# Supplementary material for: Delineation of Cocoa Agroforests Using Multi-Season Sentinel-1 SAR Images: Low Grey Level Range Reduces Uncertainties in GLCM Texture-Based Mapping
Source: Preprints.org preprint supplement (doi:10.20944/preprints201901.0050.v1), 2019-01-07
Supplement: Supplementary file 1 [file VH_TemporalProfile_For_LULC.xlsx]

## Sheet: Water_VH
Pixel-X	Pixel-Y	Longitude	Latitude	Sigma0_VH_db_mst_07Apr2015	Sigma0_VH_db_slv1_25May2015	Sigma0_VH_db_slv3_06Jun2015	Sigma0_VH_db_slv5_18Jun2015	Sigma0_VH_db_slv7_12Jul2015	Sigma0_VH_db_slv9_24Jul2015	Sigma0_VH_db_slv15_05Aug2015	Sigma0_VH_db_slv17_17Aug2015	Sigma0_VH_db_slv19_10Sep2015	Sigma0_VH_db_slv21_22Sep2015	Sigma0_VH_db_slv23_04Oct2015	Sigma0_VH_db_slv25_16Oct2015	Sigma0_VH_db_slv27_28Oct2015	Sigma0_VH_db_slv29_21Nov2015	Sigma0_VH_db_slv31_03Dec2015	Sigma0_VH_db_slv33_15Dec2015	Sigma0_VH_db_slv35_08Jan2016	Sigma0_VH_db_slv37_20Jan2016	Sigma0_VH_db_slv39_13Feb2016	Sigma0_VH_db_slv41_08Mar2016	Sigma0_VH_db_slv43_20Mar2016	Sigma0_VH_db_slv45_01Apr2016	Sigma0_VH_db_slv47_13Apr2016	Sigma0_VH_db_slv49_07May2016	Sigma0_VH_db_slv53_19May2016	Sigma0_VH_db_slv55_31May2016	Sigma0_VH_db_slv57_12Jun2016	Sigma0_VH_db_slv59_06Jul2016	Sigma0_VH_db_slv61_18Jul2016	Sigma0_VH_db_slv63_30Jul2016	Sigma0_VH_db_slv65_11Aug2016	Sigma0_VH_db_slv67_23Aug2016	Sigma0_VH_db_slv69_04Sep2016	Sigma0_VH_db_slv71_16Sep2016	Sigma0_VH_db_slv73_28Sep2016	Sigma0_VH_db_slv75_10Oct2016	Sigma0_VH_db_slv77_22Oct2016	Sigma0_VH_db_slv79_03Nov2016	Sigma0_VH_db_slv81_15Nov2016	Sigma0_VH_db_slv83_27Nov2016	Sigma0_VH_db_slv85_21Dec2016	Sigma0_VH_db_slv87_02Jan2017	Sigma0_VH_db_slv89_14Jan2017	Sigma0_VH_db_slv91_26Jan2017	Sigma0_VH_db_slv93_07Feb2017	Sigma0_VH_db_slv95_19Feb2017
193.5	586.5	11.1269	4.57194	-18.0246	-11.8298	-14.0253	-11.7494	-17.9255	-21.9569	-24.607	-16.1173	-12.1278	-9.03103	-13.1143	-11.2741	-12.0499	-14.9471	-15.9571	-15.7081	-13.7187	-17.5109	-17.8228	-13.5066	-16.2311	-15.281	-16.632	-16.4918	-18.8502	-19.2002	-17.1297	-15.2642	-17.5904	-25.2556	-15.3935	-14.9189	-16.259	-25.2525	-17.5171	-19.6876	-19.9142	-17.0968	-16.4526	-16.8885	-17.224	-17.0635	-16.7164	-16.7028	-21.9094	-17.9523
193.5	587.5	11.1269	4.57185	-16.4619	-9.36561	-12.1008	-10.3973	-18.8165	-21.3574	-21.1971	-16.7211	-10.8891	-9.19354	-13.2563	-8.37482	-14.9207	-21.1946	-16.4566	-18.7247	-15.1746	-16.6851	-15.4568	-13.4299	-14.6756	-15.4425	-19.747	-16.435	-17.1532	-14.3273	-15.8197	-14.8772	-17.7575	-20.0432	-16.4771	-12.9143	-14.0139	-21.3833	-18.5333	-17.9258	-23.9448	-16.2363	-14.7894	-15.9268	-17.8913	-16.9928	-17.589	-15.5747	-24.3777	-19.0839
192.5	588.5	11.1268	4.57176	-19.1674	-12.1953	-12.5314	-15.6072	-21.397	-22.5298	-22.5457	-15.0545	-13.8073	-14.7008	-12.9947	-9.68619	-16.6273	-24.1244	-14.4379	-17.6355	-18.9406	-14.7845	-13.3671	-12.8038	-15.8497	-15.4804	-19.5122	-15.7666	-14.7	-13.0759	-14.1185	-18.4958	-11.0823	-11.4277	-14.5072	-13.6968	-11.1006	-18.2282	-17.6416	-18.039	-18.1135	-17.7532	-17.2251	-16.6995	-19.3908	-17.1124	-16.3018	-17.4236	-17.6454	-15.865
192.5	589.5	11.1268	4.57167	-15.4616	-13.7336	-14.1011	-15.0802	-19.2163	-20.9417	-19.56	-11.2039	-14.2206	-14.5052	-12.1432	-10.8216	-15.7262	-24.2759	-14.9052	-16.5637	-20.8288	-13.6436	-18.5299	-13.4919	-15.2851	-18.3975	-18.1008	-17.592	-13.9093	-18.5473	-11.5164	-15.2003	-12.4882	-11.8877	-14.4388	-16.022	-12.6804	-19.3349	-19.0241	-14.9269	-17.0227	-19.4931	-19.8073	-18.8905	-17.1662	-16.7629	-15.036	-19.3371	-18.0607	-15.2589
192.5	590.5	11.1268	4.57158	-16.1885	-16.0901	-15.8546	-14.5591	-17.4133	-18.8156	-22.0296	-8.9516	-15.4007	-13.2721	-13.1333	-12.5346	-17.1626	-23.8942	-15.5306	-16.3725	-17.7174	-15.7849	-26.9925	-15.8386	-14.1711	-17.7271	-18.4784	-17.415	-15.7157	-19.0663	-13.228	-15.7975	-17.6766	-12.4761	-14.7299	-15.484	-16.7147	-19.9354	-18.5859	-15.2554	-17.875	-17.229	-17.6652	-16.348	-14.574	-16.4311	-15.4439	-15.6348	-20.6158	-14.3124
192.5	591.5	11.1268	4.57149	-17.9574	-16.7791	-16.1277	-15.2873	-17.7392	-20.2288	-21.0032	-10.1624	-15.4364	-12.3844	-16.5653	-13.2295	-17.958	-25.5013	-14.7769	-15.8907	-18.3153	-17.2163	-22.9711	-16.7212	-14.7966	-17.9895	-15.2082	-17.9408	-13.9938	-16.8963	-14.6023	-18.1506	-23.0902	-13.5945	-13.7766	-15.0087	-17.8225	-18.3507	-18.4779	-16.9909	-17.3915	-13.1637	-16.749	-13.3068	-14.6101	-15.6065	-16.8343	-15.4219	-17.168	-13.3722
192.5	592.5	11.1268	4.5714	-17.3931	-18.208	-15.9353	-17.0153	-19.0594	-22.5605	-18.1006	-14.3587	-14.8342	-13.4582	-17.9584	-15.2261	-20.2209	-25.8382	-14.5648	-16.9444	-17.6486	-13.4838	-18.5388	-17.6761	-17.0744	-14.4255	-14.7093	-18.953	-12.5884	-19.1668	-13.1207	-15.5602	-19.0492	-15.0425	-14.6734	-18.2959	-15.815	-19.2431	-16.4272	-15.728	-17.7359	-12.5765	-17.6614	-14.4309	-15.4939	-16.1595	-17.7118	-14.5165	-15.9152	-12.5403
220.5	654.5	11.1292	4.56582	-16.9577	-11.6716	-13.2231	-13.8335	-16.0402	-16.9618	-21.5729	-14.315	-10.7904	-11.1513	-11.0686	-12.1851	-12.2659	-11.7774	-13.4362	-10.9803	-11.6594	-10.6453	-13.588	-9.87219	-14.3409	-10.5623	-10.1323	-12.6932	-13.1123	-11.2043	-15.3769	-12.0958	-11.438	-12.9867	-15.5113	-12.5376	-16.3263	-14.1905	-10.005	-15.2397	-14.1751	-10.6871	-10.2082	-15.1135	-12.7656	-15.468	-12.4111	-12.3018	-11.8506	-18.0971
221.5	655.5	11.1293	4.56573	-16.8412	-14.7642	-11.8048	-13.3772	-15.4237	-18.7549	-17.5756	-13.64	-12.2019	-10.4259	-13.7852	-11.1939	-14.0813	-14.2449	-13.239	-10.8191	-12.5531	-12.3051	-11.0719	-12.2595	-13.7132	-10.5101	-12.734	-11.0751	-12.9715	-10.2818	-18.3041	-12.0867	-13.5881	-12.6807	-13.5861	-14.1397	-16.1535	-13.2409	-12.0617	-12.991	-12.1369	-10.3895	-14.3674	-13.4126	-10.6853	-13.3736	-13.4205	-13.9346	-12.6229	-16.9422
222.5	656.5	11.1294	4.56564	-17.7487	-16.2148	-11.5155	-12.8916	-15.7169	-16.77	-16.7612	-15.8727	-16.4504	-11.7539	-15.1183	-9.50985	-15.2004	-18.4283	-12.8695	-13.2243	-12.1055	-15.9371	-10.7306	-12.4824	-12.8239	-11.4517	-14.8881	-12.3177	-16.1382	-11.4425	-20.3142	-12.4308	-14.133	-11.2801	-11.5615	-15.1099	-12.4593	-12.5051	-14.0074	-14.5527	-11.2891	-10.1419	-17.4384	-14.238	-12.1414	-17.4613	-12.5815	-15.2492	-15.3899	-14.3923
223.5	657.5	11.1295	4.56555	-14.4206	-15.4582	-13.2029	-11.2605	-18.3179	-17.6147	-14.9646	-14.9541	-14.3998	-16.338	-14.4543	-6.93773	-12.4363	-17.6546	-13.0037	-12.9554	-12.2332	-14.4641	-12.2845	-11.3197	-10.9312	-13.0279	-16.9583	-13.0606	-13.065	-12.2009	-15.9567	-14.2679	-13.7856	-10.5709	-12.0179	-14.2144	-12.4874	-15.1293	-14.9083	-14.1297	-11.2457	-10.3076	-15.8564	-13.2473	-17.2101	-13.3761	-11.1003	-16.5069	-18.0755	-15.3726
224.5	658.5	11.1296	4.56546	-12.6188	-15.2855	-15.2371	-12.3536	-16.0306	-19.1664	-13.4793	-12.5239	-14.6774	-15.461	-12.3611	-9.40904	-9.29947	-18.4984	-11.7726	-14.4332	-10.9546	-8.6374	-13.8123	-9.75393	-13.3617	-14.4833	-15.5046	-14.5645	-11.5418	-13.5439	-12.8192	-14.2128	-15.4171	-12.6528	-15.7982	-14.3927	-14.7994	-13.3827	-12.5056	-12.1848	-10.0596	-14.3024	-14.0658	-14.4695	-13.4635	-9.35277	-12.8558	-15.149	-19.0159	-14.2949
257.5	740.5	11.1325	4.55808	-16.2773	-9.43153	-14.2673	-13.8247	-16.6236	-15.0474	-18.2873	-15.1678	-13.2889	-13.392	-14.9342	-16.2236	-13.3269	-15.7144	-16.0183	-15.4512	-15.1276	-14.3902	-18.3967	-20.7789	-20.554	-15.854	-17.7302	-16.1224	-14.0448	-16.4867	-16.4883	-15.475	-19.499	-15.4732	-16.7714	-14.5464	-14.5535	-14.0456	-16.817	-10.135	-13.5568	-12.0509	-10.9285	-16.4403	-13.2705	-15.7425	-13.4105	-12.705	-18.8805	-22.4079
258.5	742.5	11.1325	4.5579	-14.0525	-13.8004	-13.6575	-15.3193	-24.5442	-17.6293	-18.8277	-11.7144	-13.9354	-12.8599	-12.2294	-12.3546	-15.2782	-16.3995	-18.4093	-16.1592	-12.62	-19.06	-18.6887	-17.2252	-18.0288	-18.3656	-13.6463	-14.4725	-15.5804	-16.8324	-17.7318	-16.6313	-17.2983	-18.2009	-12.6933	-16.7925	-16.4666	-13.8674	-15.7352	-16.4076	-10.6177	-17.575	-17.3886	-16.617	-15.6238	-14.8153	-15.3854	-11.0163	-17.2902	-22.3998
259.5	744.5	11.1326	4.55772	-15.755	-10.545	-17.4843	-12.8832	-17.4565	-20.2966	-17.3122	-12.3017	-14.4558	-11.0309	-11.4366	-15.5218	-15.5341	-14.3778	-15.8076	-14.5478	-14.3655	-16.1625	-13.0759	-20.7274	-13.5629	-13.7583	-15.1094	-15.8548	-11.7595	-14.9798	-14.332	-15.9371	-19.4868	-18.6227	-14.8278	-17.4019	-15.0459	-14.9665	-14.7488	-16.8561	-14.1843	-15.1275	-15.9952	-16.6954	-16.7105	-13.1963	-19.1085	-13.9499	-13.69	-16.9397
259.5	745.5	11.1326	4.55763	-16.2302	-11.5038	-14.8904	-13.6813	-16.2239	-17.7082	-15.6502	-14.2577	-17.0848	-10.3256	-12.8343	-16.4385	-16.1328	-15.6118	-16.8912	-11.7458	-12.6077	-16.1246	-12.0592	-15.5578	-14.445	-14.0504	-12.1964	-14.4411	-12.8042	-16.0155	-12.0375	-17.0268	-18.6653	-15.2219	-16.1304	-14.1074	-13.912	-11.7207	-13.177	-15.8319	-15.7828	-17.9104	-15.149	-16.9341	-14.7049	-14.8919	-16.7133	-17.2125	-13.1623	-16.8616
266.5	748.5	11.1332	4.55736	-14.3731	-10.8711	-14.5578	-13.7075	-16.6283	-15.2359	-17.1159	-18.174	-17.3266	-14.2599	-16.8327	-18.388	-17.4498	-13.6474	-16.8287	-15.415	-17.2244	-12.2532	-15.8632	-21.372	-21.2132	-18.6541	-13.2885	-18.752	-16.9782	-17.0008	-14.7066	-15.5887	-18.8362	-21.0865	-18.206	-17.9114	-16.707	-16.0584	-15.5543	-19.3189	-16.8175	-16.7451	-14.1996	-17.9155	-16.2325	-15.3736	-17.2503	-19.1603	-17.5098	-17.2927
267.5	748.5	11.1333	4.55736	-13.1588	-9.46177	-14.091	-14.3023	-17.5803	-16.6843	-18.5411	-17.4327	-16.5465	-14.7597	-16.6892	-17.1593	-15.6568	-13.7537	-13.668	-14.4724	-15.6091	-14.0761	-17.9011	-23.7125	-21.2652	-17.2832	-17.6467	-18.8943	-15.2907	-16.3977	-14.7747	-17.2864	-20.0014	-21.1671	-19.3797	-20.3943	-18.6354	-17.4814	-16.2745	-16.998	-15.7089	-16.9542	-15.6236	-18.6703	-17.9882	-15.9591	-17.6239	-17.7056	-19.3334	-17.9111
266.5	757.5	11.1332	4.55655	-17.748	-10.0904	-8.77755	-13.6885	-15.4652	-13.9379	-14.6519	-12.7352	-13.222	-15.5265	-10.8048	-11.7261	-12.4434	-14.5288	-15.8083	-16.0446	-13.2528	-14.7597	-17.7763	-16.8435	-15.8411	-14.4117	-12.8481	-15.6587	-16.6514	-11.6734	-14.8361	-16.1413	-13.4615	-14.6772	-14.4123	-13.8358	-14.1027	-14.5011	-17.1689	-15.2975	-16.2251	-14.7739	-14.2198	-17.8328	-17.5382	-14.8067	-17.1765	-17.2559	-14.3166	-12.7774
266.5	758.5	11.1332	4.55646	-17.6591	-11.8136	-8.99353	-12.0092	-16.0548	-15.6365	-15.7274	-13.0792	-13.9511	-14.1381	-11.9971	-13.0092	-12.1182	-18.0852	-15.7999	-16.7825	-14.2612	-12.8577	-16.0057	-18.5608	-14.0875	-13.3123	-13.7394	-13.6701	-15.5108	-15.9149	-13.5939	-16.8545	-13.1986	-14.0222	-14.0518	-13.5244	-15.1506	-13.9557	-18.3367	-15.0972	-16.0391	-14.4536	-14.66	-15.0863	-15.1637	-14.5001	-15.2792	-16.199	-12.8094	-14.5973
265.5	760.5	11.1331	4.55629	-16.1551	-10.9256	-13.3136	-14.822	-16.041	-14.3662	-12.0416	-12.422	-12.7281	-10.7306	-12.0775	-12.5365	-13.6022	-16.637	-16.989	-15.9632	-15.9774	-14.6442	-15.6495	-17.5929	-10.5675	-12.7011	-15.46	-15.2737	-16.8315	-13.0094	-14.5826	-16.2139	-16.0205	-14.6235	-12.4404	-14.5342	-15.2779	-13.8593	-12.6651	-10.0815	-12.7454	-8.58834	-15.0399	-17.2166	-15.2857	-14.1055	-14.832	-17.5702	-17.4003	-17.7203
264.5	762.5	11.1331	4.55611	-17.2289	-13.7458	-17.4303	-11.6564	-16.897	-17.9025	-15.8876	-13.0127	-11.0308	-11.1262	-13.5963	-12.6405	-11.4572	-15.0406	-17.6585	-12.2659	-14.9616	-13.7618	-16.7085	-15.0708	-14.3389	-13.8608	-15.8061	-18.7107	-16.7442	-17.2817	-15.8906	-15.2117	-16.4361	-12.6944	-18.6622	-16.1749	-11.6358	-15.6733	-17.2825	-13.4294	-12.8816	-12.5112	-15.8335	-14.7299	-14.1743	-15.119	-15.644	-16.6037	-15.3092	-24.6122
264.5	763.5	11.1331	4.55602	-15.0166	-13.6361	-17.6226	-10.8053	-19.5964	-15.9481	-15.252	-13.2685	-12.1297	-10.2221	-13.0288	-13.8709	-11.8878	-15.5749	-17.7205	-15.2773	-16.4333	-15.7503	-17.7426	-14.3259	-15.5334	-15.6293	-17.4339	-19.8567	-16.2765	-19.0239	-16.7803	-14.7587	-17.0088	-13.7012	-18.1837	-14.3831	-12.9738	-14.9343	-14.5857	-14.676	-13.591	-16.4477	-19.8139	-13.284	-14.7875	-15.883	-16.3971	-17.5053	-15.8569	-21.7034
267.5	768.5	11.1333	4.55557	-14.127	-14.0635	-15.2332	-10.3419	-20.8757	-15.0427	-16.5618	-10.2811	-15.6216	-15.3913	-13.6156	-12.1935	-16.7334	-13.9185	-13.6971	-12.8423	-13.1217	-14.4989	-14.0161	-13.4037	-12.6775	-21.3496	-14.4212	-13.2901	-16.488	-17.695	-14.6321	-16.6488	-14.9203	-18.0328	-14.045	-11.931	-15.4602	-15.1038	-16.9877	-15.6636	-9.67488	-13.037	-18.4966	-16.378	-13.6329	-15.0611	-11.4064	-12.1642	-16.3745	-16.3384
270.5	769.5	11.1336	4.55547	-16.0229	-13.9676	-13.864	-14.6821	-18.9473	-15.87	-15.6857	-12.7936	-13.7735	-16.3329	-16.6947	-14.2054	-15.685	-14.9713	-13.5149	-17.0006	-12.3018	-13.8366	-14.7412	-17.0414	-18.0561	-15.4114	-21.109	-14.8021	-14.4566	-14.1838	-18.2325	-13.6627	-13.4758	-14.1955	-11.9942	-14.6215	-15.0189	-14.4605	-14.0155	-13.3475	-14.1039	-13.7775	-13.3049	-10.282	-15.9652	-11.3752	-17.968	-14.9392	-15.2791	-12.4126
271.5	769.5	11.1337	4.55547	-15.2453	-14.1736	-13.7974	-15.8661	-16.5735	-16.2624	-15.8115	-12.4035	-12.4265	-16.0031	-16.5388	-12.7219	-17.3998	-15.0109	-10.2799	-14.6096	-13.8431	-16.0866	-11.4898	-14.757	-14.6198	-16.5501	-20.4086	-12.6367	-11.9149	-12.832	-18.7317	-15.3695	-14.71	-16.0126	-12.6771	-15.7568	-15.6295	-12.624	-17.8699	-13.9796	-15.7318	-14.8899	-13.6283	-12.4673	-13.6325	-11.4665	-19.6246	-15.3175	-15.7802	-13.1854
272.5	769.5	11.1338	4.55547	-15.4256	-17.155	-15.1925	-16.0783	-16.0388	-17.8721	-16.2178	-12.4484	-11.9086	-14.2201	-17.3537	-12.6862	-18.3931	-14.3709	-9.31041	-14.2457	-15.5836	-15.7002	-10.1926	-15.0841	-13.3405	-17.4861	-17.4087	-13.1323	-11.9239	-13.1604	-15.7974	-14.8203	-16.578	-17.3607	-14.6471	-17.6626	-15.8847	-10.6594	-20.0324	-14.3549	-14.7726	-15.4119	-14.7286	-16.3739	-13.0618	-13.5001	-20.7027	-17.1404	-14.3892	-12.6169
273.5	782.5	11.1338	4.55431	-10.1988	-11.5185	-14.2831	-18.4208	-14.478	-12.5357	-13.1966	-18.7427	-13.4015	-14.1711	-14.1963	-19.2282	-19.0834	-21.5399	-11.5225	-12.8887	-13.4182	-13.5749	-7.89154	-13.8206	-14.2631	-13.3923	-11.977	-13.3759	-11.0548	-16.2405	-14.1081	-14.871	-13.9704	-10.5975	-11.1711	-14.5791	-13.1053	-13.8506	-11.7787	-13.5358	-7.19522	-11.5455	-11.301	-15.9095	-10.9707	-11.8835	-11.0538	-13.3041	-15.389	-12.4524
273.5	783.5	11.1338	4.55422	-11.4956	-11.3774	-14.3819	-15.7729	-14.53	-13.208	-13.0622	-16.3525	-12.7246	-12.0387	-14.4487	-20.6434	-20.0607	-20.9965	-10.4315	-12.79	-13.9704	-11.9483	-9.47005	-13.5018	-10.5102	-12.0392	-9.0939	-13.3233	-11.7419	-15.6473	-12.5459	-14.9175	-14.5645	-10.1155	-11.4044	-13.1333	-15.2349	-14.4937	-13.4484	-14.9353	-7.13953	-11.4325	-13.6592	-14.8538	-11.5895	-11.0701	-11.7519	-12.9525	-13.9483	-13.4788
272.5	784.5	11.1337	4.55413	-16.0216	-13.0724	-15.7083	-15.5816	-16.8076	-12.9842	-17.6303	-14.4078	-13.9405	-11.7749	-13.8072	-17.2605	-14.0701	-19.9775	-12.545	-11.3126	-12.9576	-14.536	-13.3264	-12.0658	-11.2909	-11.1906	-11.6313	-16.4486	-10.2387	-15.8332	-13.7284	-15.8127	-21.2995	-11.9492	-15.3706	-14.6536	-16.2117	-16.224	-17.5733	-16.6715	-9.97745	-14.4354	-11.8535	-14.7879	-15.7964	-13.228	-14.3228	-16.8285	-16.7089	-16.1136
272.5	785.5	11.1337	4.55404	-18.501	-13.1441	-15.4629	-13.6756	-18.2712	-14.9364	-20.5538	-12.7337	-13.3029	-11.7975	-13.2597	-16.7514	-15.1029	-22.2921	-13.6983	-11.0611	-12.6579	-14.5159	-14.5022	-9.06791	-10.1512	-12.5808	-15.1481	-17.5069	-10.9525	-15.2182	-13.8243	-15.0242	-23.8276	-13.3781	-15.9592	-15.2941	-13.843	-21.8871	-16.5243	-17.5822	-13.4874	-14.3195	-12.6118	-13.2299	-15.8743	-14.0941	-14.8125	-17.1469	-18.4933	-20.1124
278.5	786.5	11.1343	4.55394	-14.0516	-14.127	-17.1798	-16.1517	-18.3315	-16.5144	-16.8401	-16.676	-12.7336	-16.3185	-14.0239	-15.0121	-16.7539	-14.4751	-17.7008	-23.1172	-20.31	-21.4129	-17.8457	-19.9177	-24.1196	-17.7115	-23.114	-13.7716	-19.3049	-16.7466	-14.8262	-17.4449	-22.6726	-22.3524	-17.4547	-20.6776	-19.9339	-14.3989	-25.0861	-16.5398	-20.6898	-17.3392	-22.1628	-19.8253	-17.6622	-16.4916	-19.6093	-20.3516	-9.64481	-10.0005
279.5	786.5	11.1344	4.55394	-16.0564	-13.1831	-15.8655	-16.4719	-18.6986	-18.9757	-16.6534	-18.1887	-13.3387	-14.4976	-14.3371	-13.2924	-15.1139	-14.8515	-18.9076	-21.755	-20.0301	-21.7067	-21.6116	-17.951	-18.6443	-16.6096	-20.7832	-13.5328	-17.3619	-16.5271	-16.8556	-21.7802	-20.1327	-24.4738	-17.6849	-24.0416	-19.4463	-15.1155	-19.4628	-17.1562	-17.2136	-22.0405	-21.8296	-21.715	-17.0392	-17.6191	-20.0245	-20.14	-10.3341	-14.8665
277.5	787.5	11.1342	4.55386	-18.3495	-17.1177	-15.6461	-18.5255	-19.4422	-18.3072	-16.0063	-15.3544	-13.6354	-15.548	-15.3304	-16.0641	-16.7909	-16.6041	-13.2525	-18.3853	-15.9688	-17.1109	-13.1265	-19.7392	-20.7052	-17.6709	-17.8445	-17.9175	-12.7926	-15.7048	-15.9792	-11.1652	-16.9216	-13.9886	-16.2816	-12.973	-13.9034	-13.6698	-19.9136	-15.2761	-15.8624	-13.0466	-15.0423	-16.4975	-14.5519	-12.2889	-13.0886	-23.7333	-11.1651	-12.8616
276.5	788.5	11.1341	4.55377	-16.3139	-17.9422	-16.0875	-15.3228	-18.6051	-19.0593	-22.3536	-13.5187	-14.944	-14.3688	-17.2256	-18.3697	-15.5854	-18.6563	-12.6608	-11.811	-12.8531	-12.7863	-14.8892	-14.9103	-15.7601	-14.9418	-16.0685	-17.1017	-12.3129	-15.9809	-15.5079	-12.0815	-12.8629	-10.7245	-11.7782	-9.91777	-8.88213	-14.9281	-18.4726	-10.2866	-13.3171	-14.2528	-10.5279	-16.5174	-12.5288	-11.6152	-11.1369	-16.8586	-14.5636	-16.3139
274.5	789.5	11.1339	4.55368	-16.7113	-13.7746	-17.7572	-14.865	-16.8261	-16.1067	-14.2132	-14.9331	-18.2311	-16.3664	-19.2843	-17.415	-16.2162	-14.4279	-13.6522	-13.9518	-17.9903	-16.8181	-16.1531	-13.5963	-10.2583	-13.468	-17.5877	-15.6755	-15.1117	-11.8779	-18.7524	-13.9569	-16.0553	-12.7567	-14.2006	-13.4501	-10.9236	-20.0927	-15.014	-13.2769	-14.6873	-13.2296	-12.1966	-20.6397	-17.1933	-15.0527	-13.3941	-15.8868	-19.4764	-18.4266
306.5	794.5	11.1368	4.5532	-11.0153	-11.927	-16.4108	-14.2287	-14.1408	-15.2829	-21.9171	-19.1008	-16.7204	-14.5004	-17.0073	-15.9553	-14.6109	-13.2536	-15.6518	-17.1947	-15.8007	-15.6199	-16.8961	-16.9419	-17.4876	-16.831	-18.7411	-21.9474	-14.3547	-18.5122	-14.1006	-11.4049	-18.4919	-14.3755	-16.0716	-16.3182	-16.8545	-16.5238	-11.3203	-17.1744	-14.9564	-16.5301	-17.0966	-19.7831	-16.3159	-13.4757	-14.1263	-16.259	-16.2213	-17.4462
307.5	794.5	11.1369	4.5532	-12.0277	-10.7802	-16.8948	-14.3816	-15.0828	-16.3618	-16.5938	-19.9375	-16.4516	-12.9233	-15.9139	-15.4238	-15.1816	-16.9612	-18.3192	-18.8604	-17.227	-17.6437	-17.295	-21.0251	-17.9794	-19.534	-16.5771	-18.3499	-14.1263	-17.9634	-16.5577	-15.0206	-19.2215	-20.6203	-16.2316	-16.6989	-22.4321	-16.1481	-10.4991	-16.4794	-15.947	-17.2929	-15.802	-21.6304	-17.136	-15.017	-13.8455	-17.3575	-16.6592	-18.2371
308.5	794.5	11.1369	4.5532	-13.832	-11.4409	-17.9907	-15.2268	-14.8998	-16.0884	-15.0799	-20.3303	-20.2069	-13.4379	-15.4966	-14.5061	-15.7197	-16.6512	-17.6422	-22.623	-16.3243	-20.2524	-19.1863	-23.0088	-19.4751	-18.1775	-14.9378	-16.1933	-15.0499	-17.52	-19.0056	-14.9831	-19.1894	-20.8686	-17.8462	-16.7258	-18.1936	-15.9077	-12.5461	-15.8031	-16.6156	-14.1912	-15.6286	-17.304	-16.8609	-19.1254	-15.0097	-18.5375	-17.7146	-17.1287
455.5	850.5	11.15	4.54803	-11.9525	-13.199	-13.7826	-12.3782	-16.7023	-14.4416	-16.4106	-14.773	-14.428	-13.5478	-11.1901	-11.1048	-11.9304	-15.5188	-18.7638	-15.6414	-17.4482	-18.6552	-15.7033	-18.8628	-15.7174	-19.7813	-14.8868	-21.2343	-15.8414	-18.6188	-15.2594	-17.6758	-16.4457	-13.2322	-22.411	-12.8962	-16.14	-14.8504	-16.2	-14.4475	-18.1459	-13.1184	-18.1796	-18.1481	-15.8434	-16.9995	-19.1004	-17.4843	-23.586	-21.6471
454.5	851.5	11.1499	4.54794	-11.9398	-14.2141	-18.7551	-13.8117	-12.6332	-12.1587	-16.1089	-15.9396	-14.114	-13.4032	-13.4586	-14.3668	-14.6851	-11.7656	-17.7762	-16.0527	-21.769	-16.0391	-18.0233	-16.9539	-22.5752	-19.3267	-19.1902	-18.647	-14.6823	-18.8879	-21.3812	-17.334	-20.4848	-15.0784	-21.4707	-15.6547	-16.074	-13.4037	-15.0222	-15.7707	-14.968	-15.2043	-20.4961	-19.2363	-19.9149	-15.0994	-18.4951	-17.5133	-21.5358	-21.6058
455.5	851.5	11.15	4.54794	-12.3808	-14.2613	-16.888	-13.2133	-14.4524	-13.9816	-17.1626	-13.7077	-13.8361	-12.3472	-12.7005	-13.1398	-14.0055	-13.0361	-17.7151	-15.6505	-20.161	-14.4654	-15.5197	-15.8915	-17.2681	-23.4378	-17.109	-18.7691	-16.4619	-18.2796	-16.9101	-15.8272	-18.2526	-13.8198	-22.3262	-13.1195	-17.1477	-14.8787	-15.7795	-15.497	-17.2388	-13.3037	-22.3763	-18.2689	-15.5013	-15.5602	-20.0528	-16.3939	-21.2162	-22.9809
454.5	852.5	11.1499	4.54785	-11.4288	-15.6211	-17.1592	-16.961	-13.4979	-12.7199	-15.7868	-14.3131	-13.2813	-13.2844	-13.8439	-14.8427	-16.9459	-12.6449	-16.3017	-18.111	-19.9633	-16.0811	-18.9399	-17.2983	-25.327	-17.7786	-19.7785	-17.3185	-18.8751	-17.6057	-18.7111	-18.1003	-22.2257	-13.9855	-17.1757	-18.4049	-16.3489	-13.7691	-15.6337	-19.024	-15.4643	-15.855	-22.078	-17.0326	-21.2105	-14.8959	-17.6883	-17.6148	-19.62	-18.7498
454.5	853.5	11.1499	4.54777	-13.2548	-17.118	-14.6207	-16.9537	-15.2733	-12.1139	-14.9401	-13.3572	-15.175	-14.0037	-12.7433	-12.8432	-15.7294	-15.5309	-16.0785	-19.9123	-17.5159	-17.7393	-18.421	-18.3147	-20.3605	-17.5758	-19.5032	-16.2729	-22.1948	-14.9665	-15.7449	-18.094	-19.9879	-13.22	-17.3033	-18.4391	-15.8406	-13.0008	-16.1226	-23.0826	-16.5496	-13.9411	-20.4639	-15.2645	-25.6895	-16.0014	-17.9851	-18.7655	-20.2014	-21.3959
[truncated: 7 more columns]

## Sheet: SavannahShrub
Pixel-X	Pixel-Y	Longitude	Latitude	Sigma0_VH_db_mst_07Apr2015	Sigma0_VH_db_slv1_25May2015	Sigma0_VH_db_slv3_06Jun2015	Sigma0_VH_db_slv5_18Jun2015	Sigma0_VH_db_slv7_12Jul2015	Sigma0_VH_db_slv9_24Jul2015	Sigma0_VH_db_slv15_05Aug2015	Sigma0_VH_db_slv17_17Aug2015	Sigma0_VH_db_slv19_10Sep2015	Sigma0_VH_db_slv21_22Sep2015	Sigma0_VH_db_slv23_04Oct2015	Sigma0_VH_db_slv25_16Oct2015	Sigma0_VH_db_slv27_28Oct2015	Sigma0_VH_db_slv29_21Nov2015	Sigma0_VH_db_slv31_03Dec2015	Sigma0_VH_db_slv33_15Dec2015	Sigma0_VH_db_slv35_08Jan2016	Sigma0_VH_db_slv37_20Jan2016	Sigma0_VH_db_slv39_13Feb2016	Sigma0_VH_db_slv41_08Mar2016	Sigma0_VH_db_slv43_20Mar2016	Sigma0_VH_db_slv45_01Apr2016	Sigma0_VH_db_slv47_13Apr2016	Sigma0_VH_db_slv49_07May2016	Sigma0_VH_db_slv53_19May2016	Sigma0_VH_db_slv55_31May2016	Sigma0_VH_db_slv57_12Jun2016	Sigma0_VH_db_slv59_06Jul2016	Sigma0_VH_db_slv61_18Jul2016	Sigma0_VH_db_slv63_30Jul2016	Sigma0_VH_db_slv65_11Aug2016	Sigma0_VH_db_slv67_23Aug2016	Sigma0_VH_db_slv69_04Sep2016	Sigma0_VH_db_slv71_16Sep2016	Sigma0_VH_db_slv73_28Sep2016	Sigma0_VH_db_slv75_10Oct2016	Sigma0_VH_db_slv77_22Oct2016	Sigma0_VH_db_slv79_03Nov2016	Sigma0_VH_db_slv81_15Nov2016	Sigma0_VH_db_slv83_27Nov2016	Sigma0_VH_db_slv85_21Dec2016	Sigma0_VH_db_slv87_02Jan2017	Sigma0_VH_db_slv89_14Jan2017	Sigma0_VH_db_slv91_26Jan2017	Sigma0_VH_db_slv93_07Feb2017	Sigma0_VH_db_slv95_19Feb2017
333.5	611.5	11.1394	4.56956	-15.2103	-12.5194	-13.8946	-16.4788	-11.3973	-17.6097	-15.7452	-17.0639	-12.3099	-16.4611	-15.6535	-14.0214	-15.5714	-17.0218	-15.4006	-18.0244	-17.8448	-18.1768	-19.1814	-15.1104	-20.086	-19.3133	-16.0484	-15.5207	-19.0013	-17.477	-15.6928	-14.5824	-15.7592	-12.9079	-16.4534	-14.4241	-15.7431	-15.5733	-11.3414	-14.1591	-15.0017	-13.5978	-19.1436	-18.9707	-18.5705	-20.2883	-20.3703	-16.3233	-26.0355	-16.3862
332.5	612.5	11.1393	4.56947	-16.874	-13.9651	-16.2633	-15.6883	-12.3415	-18.3291	-17.2954	-15.6218	-10.2808	-19.187	-12.8885	-12.4118	-16.6418	-15.2399	-17.5243	-15.2678	-17.8218	-19.539	-18.059	-18.3318	-17.906	-22.2945	-14.7632	-18.78	-20.6212	-20.7235	-14.7361	-15.1172	-16.9058	-16.6046	-20.1044	-14.8786	-17.9561	-15.7476	-16.1411	-18.5177	-16.3733	-16.2036	-17.4511	-23.4604	-16.5254	-23.6312	-21.4902	-18.7303	-22.3955	-17.6989
333.5	612.5	11.1394	4.56947	-13.5434	-15.2339	-16.1306	-16.301	-15.8276	-17.8633	-16.2397	-17.6702	-11.6634	-16.8223	-14.4171	-13.9998	-15.618	-17.6935	-17.8786	-17.8269	-17.0932	-18.2656	-18.1722	-17.4476	-17.2348	-18.0521	-15.5349	-16.9628	-18.8294	-16.5605	-17.4476	-15.6436	-14.7667	-13.9501	-16.7094	-14.9867	-16.2282	-14.5918	-12.1783	-16.4529	-15.1398	-14.7323	-15.4933	-18.0747	-16.7138	-20.0494	-17.8543	-17.6335	-24.8506	-17.6323
334.5	612.5	11.1395	4.56947	-13.651	-18.8487	-17.1065	-15.5573	-17.8308	-17.7859	-13.8215	-20.2325	-15.88	-16.3958	-15.0249	-15.503	-14.2966	-15.3887	-17.2029	-17.7019	-15.9637	-17.0748	-17.5558	-19.8757	-16.7274	-16.1634	-14.4292	-15.6972	-14.1938	-15.3727	-16.631	-16.7284	-12.6348	-13.9164	-16.1855	-16.5123	-13.0128	-16.3205	-11.6737	-16.9015	-15.5385	-15.0465	-14.5531	-14.6954	-14.552	-16.2871	-15.254	-16.613	-19.9559	-22.476
331.5	613.5	11.1392	4.56938	-16.6566	-16.4554	-17.3443	-16.177	-12.4534	-16.9441	-13.7927	-17.4121	-12.6609	-17.2401	-14.5616	-13.7007	-16.3727	-13.4481	-15.483	-12.7836	-16.6548	-20.1156	-18.2843	-20.447	-20.7075	-21.688	-16.6149	-18.4809	-18.9537	-20.7361	-14.8263	-16.0031	-16.905	-22.1332	-21.0682	-17.6676	-15.859	-14.1178	-23.802	-20.3597	-18.3551	-19.2118	-19.0114	-20.3343	-12.3948	-17.5148	-17.0451	-18.8429	-18.1584	-15.9825
332.5	613.5	11.1393	4.56938	-15.9378	-16.2076	-16.7644	-15.957	-13.1532	-17.1263	-15.9877	-16.8797	-10.8966	-18.5118	-13.4388	-12.8048	-18.0527	-16.7387	-16.7589	-13.4467	-16.8583	-17.4912	-18.3833	-21.2061	-19.926	-20.178	-17.7904	-19.3097	-24.3805	-18.1322	-16.5156	-14.8467	-15.2943	-16.8369	-19.698	-17.3631	-19.3806	-12.1122	-17.5275	-20.7209	-17.8594	-18.1925	-15.9285	-21.6494	-15.4753	-21.6582	-19.3823	-20.78	-20.6655	-19.0267
333.5	613.5	11.1394	4.56938	-13.1338	-17.1847	-17.1829	-14.7967	-17.1806	-15.4263	-16.3802	-17.9652	-12.5293	-16.0679	-13.7768	-13.3547	-15.6719	-17.9202	-17.5555	-16.5759	-19.2898	-18.7998	-18.0634	-19.8633	-19.132	-18.887	-16.6332	-17.6279	-19.3821	-16.3318	-18.3729	-16.5445	-13.2853	-14.9878	-17.908	-15.6731	-14.2438	-13.9807	-14.3837	-19.5885	-16.7499	-15.4075	-13.2788	-17.6403	-15.697	-18.7548	-17.8217	-17.3611	-18.7878	-17.3589
334.5	613.5	11.1395	4.56938	-12.2811	-17.2319	-19.5165	-14.6548	-18.6429	-15.6104	-14.7604	-21.0295	-16.7706	-15.3443	-14.6276	-15.2649	-13.8327	-15.868	-17.6287	-16.0845	-18.4305	-20.9561	-18.9619	-20.7823	-16.6447	-18.4502	-13.5839	-16.7331	-14.8495	-15.282	-18.8848	-17.726	-12.9813	-14.6653	-18.4547	-16.2739	-11.9065	-16.2691	-15.4503	-18.5899	-15.3597	-14.9519	-13.5216	-15.89	-12.8753	-16.806	-15.8323	-16.7387	-17.4169	-18.1864
335.5	613.5	11.1395	4.56938	-12.8176	-18.3197	-21.2165	-14.0981	-17.4842	-16.805	-14.9199	-20.6884	-16.8304	-17.0153	-14.3119	-17.1302	-13.799	-14.6957	-16.7479	-15.9522	-15.6184	-19.5203	-20.3746	-23.2675	-17.042	-19.6844	-13.2657	-19.7329	-14.3044	-15.2647	-17.469	-16.3181	-13.8674	-13.33	-18.819	-15.5995	-12.4551	-14.7482	-17.1249	-17.5293	-14.8027	-16.0323	-15.4082	-13.2947	-12.4915	-16.9657	-14.718	-16.8637	-17.7241	-15.6796
330.5	614.5	11.1391	4.56929	-13.778	-14.852	-14.9052	-16.3261	-16.8705	-14.2383	-14.2911	-18.6557	-17.1738	-14.9325	-15.3584	-12.0298	-16.4539	-13.8883	-17.2557	-14.7601	-18.6846	-19.8131	-16.6029	-17.5807	-20.0939	-20.6523	-16.9862	-16.7892	-22.1263	-18.0595	-15.4242	-16.1919	-15.9338	-18.0742	-21.3992	-19.7822	-15.1463	-13.1647	-19.5668	-19.6003	-15.9061	-18.0786	-15.6432	-19.6916	-13.5173	-15.5117	-19.4501	-18.9978	-19.0415	-13.9325
331.5	614.5	11.1392	4.56929	-15.5215	-16.0135	-15.7109	-18.025	-13.9019	-14.777	-13.4253	-18.8354	-15.9532	-18.0996	-13.9474	-13.8517	-17.7895	-15.7776	-17.4022	-13.213	-15.5351	-18.7908	-17.2127	-23.8857	-18.7201	-21.0545	-18.1365	-17.2115	-25.4448	-15.6132	-16.4552	-14.3004	-17.9179	-19.0425	-23.0257	-19.4847	-17.3392	-11.0858	-20.4136	-19.2781	-18.5398	-18.3145	-17.7028	-17.0415	-14.3487	-17.9061	-18.0239	-20.9493	-19.8138	-15.9798
332.5	614.5	11.1393	4.56929	-14.0977	-15.4168	-16.463	-16.6003	-13.674	-16.371	-14.4633	-19.1396	-13.5781	-19.0835	-11.8286	-13.8725	-17.8468	-19.1145	-17.1157	-13.687	-17.6807	-16.928	-17.9889	-24.7726	-19.2497	-19.7949	-20.3304	-19.7879	-23.5547	-16.7498	-18.0936	-14.1776	-16.3931	-15.3303	-19.0811	-16.0417	-16.7548	-11.8105	-16.0909	-19.977	-19.7631	-16.9624	-15.5706	-18.4861	-18.4329	-18.331	-18.8226	-20.1868	-20.2253	-15.9415
333.5	614.5	11.1394	4.56929	-13.1554	-13.6728	-17.9243	-14.5683	-16.2255	-14.9886	-16.9346	-19.5115	-14.9407	-15.9638	-12.0768	-13.5632	-15.1852	-18.4627	-16.5954	-15.8904	-18.9679	-20.6494	-18.3663	-19.9014	-24.0301	-21.9071	-16.3676	-18.0813	-18.0914	-15.4687	-18.3629	-15.6946	-15.6234	-13.7317	-18.4862	-14.5025	-13.0102	-15.8841	-14.6349	-17.7768	-17.6084	-15.8186	-13.678	-17.6804	-15.5163	-16.8308	-17.7141	-18.6283	-17.6869	-15.3383
334.5	614.5	11.1395	4.56929	-12.035	-14.7263	-20.7138	-13.6718	-18.4164	-15.3414	-16.498	-22.3722	-16.8211	-14.5919	-15.6542	-15.6098	-12.927	-18.9721	-17.6433	-16.1779	-15.0265	-21.4609	-21.0193	-20.3637	-21.2215	-21.3335	-13.0622	-16.9469	-15.6856	-15.5714	-19.5327	-15.4143	-15.3889	-13.1793	-18.5286	-14.2757	-12.262	-16.0205	-14.7935	-15.7917	-16.2058	-16.3155	-14.6171	-17.7398	-12.9752	-16.803	-16.1367	-18.7768	-18.6255	-15.7842
335.5	614.5	11.1395	4.56929	-13.148	-17.1812	-21.2462	-13.7333	-16.8694	-17.4475	-17.4423	-21.8795	-16.2409	-15.3181	-16.4404	-15.8406	-12.2097	-18.294	-17.3768	-16.757	-13.9602	-18.4379	-23.6081	-23.5088	-18.6531	-21.1513	-13.8716	-17.508	-16.7342	-16.4516	-18.3888	-14.4783	-16.096	-12.2355	-21.66	-14.4952	-13.7648	-15.1515	-15.1389	-14.7278	-15.3074	-17.2668	-16.4517	-15.8994	-12.9951	-17.6149	-15.2083	-20.2179	-17.8017	-15.3028
336.5	614.5	11.1396	4.56929	-14.1372	-16.5128	-20.0366	-14.5509	-16.3298	-16.2271	-15.719	-19.792	-16.6553	-16.1165	-14.9873	-13.9023	-12.2069	-17.9936	-16.2769	-16.9016	-15.2094	-18.2592	-23.501	-22.7111	-19.5978	-22.5602	-17.1494	-19.1943	-17.6235	-14.4762	-16.8668	-15.4875	-18.1236	-11.903	-21.1095	-15.2258	-16.0512	-14.3162	-15.3494	-12.5781	-14.0988	-15.1849	-16.8369	-13.3406	-14.1322	-17.0779	-15.2918	-22.4897	-15.6625	-15.3778
331.5	615.5	11.1392	4.5692	-13.7869	-17.4437	-15.1297	-19.4767	-14.921	-12.1883	-11.1174	-18.8542	-17.4754	-19.2477	-14.0638	-14.4211	-17.6845	-20.6089	-16.9426	-15.4988	-15.7569	-20.22	-16.5004	-26.6006	-16.0781	-21.4789	-18.7908	-16.5948	-19.5474	-16.2311	-16.1505	-14.1661	-17.0767	-15.2204	-18.4393	-18.2755	-16.2738	-12.2565	-16.619	-16.9287	-17.0066	-16.1195	-16.2928	-17.314	-18.5771	-17.2161	-18.6825	-23.9523	-19.4257	-17.7899
332.5	615.5	11.1393	4.5692	-13.4973	-17.3533	-15.949	-17.2012	-14.4189	-12.9565	-12.7803	-21.0846	-15.9856	-19.5572	-11.6798	-15.951	-17.8864	-18.8069	-16.6047	-15.097	-18.3234	-19.5666	-17.3467	-25.122	-17.1009	-22.1215	-19.8703	-18.5601	-17.5361	-15.5164	-17.8813	-14.996	-17.4531	-14.1527	-17.0716	-14.0884	-16.1592	-15.6214	-13.98	-17.3521	-17.469	-15.4611	-18.1358	-17.421	-23.0025	-17.2682	-18.4242	-23.5123	-23.2468	-16.816
333.5	615.5	11.1394	4.5692	-12.8249	-14.5571	-17.5848	-14.8309	-17.0471	-13.7362	-15.0553	-21.9591	-15.8478	-15.9394	-12.2857	-15.3206	-15.3383	-16.0634	-17.4427	-16.6972	-15.6837	-19.1181	-18.7632	-18.835	-21.602	-22.682	-15.9015	-18.4886	-15.9757	-15.3556	-16.0217	-15.3515	-17.2712	-13.6541	-18.3221	-13.913	-15.0833	-16.1827	-13.6989	-15.1584	-13.8416	-16.0792	-16.4154	-16.4801	-18.0559	-17.1836	-16.8229	-20.6269	-23.0288	-15.5423
334.5	615.5	11.1395	4.5692	-12.672	-15.8618	-20.085	-13.3677	-17.4312	-15.8335	-16.327	-21.1996	-15.7049	-14.4738	-16.7494	-16.8167	-13.3205	-19.9262	-17.958	-18.2049	-13.2169	-17.3229	-21.6534	-18.7256	-26.0976	-23.3367	-13.5518	-16.9405	-15.8046	-17.3316	-15.5059	-14.7216	-16.3104	-13.5965	-19.8958	-14.5763	-15.1277	-16.0852	-14.4636	-14.5905	-12.4448	-16.9322	-15.907	-17.1768	-14.9185	-17.102	-16.4617	-19.5013	-27.8952	-16.5817
332.5	616.5	11.1393	4.56911	-15.3544	-18.6302	-16.0672	-16.7009	-14.9596	-12.5439	-12.5229	-20.6866	-15.6092	-17.295	-14.0772	-17.2276	-18.7868	-16.0533	-16.6868	-16.7092	-17.9917	-17.8286	-18.5601	-22.2861	-17.5831	-23.7821	-20.276	-17.796	-16.3095	-18.7748	-15.8904	-16.644	-16.4339	-14.2436	-14.5939	-13.9301	-15.1245	-15.2551	-12.789	-15.8663	-15.3781	-16.2113	-19.1523	-17.8679	-18.9842	-18.1605	-18.253	-21.2401	-21.612	-19.5231
333.5	616.5	11.1394	4.56911	-15.8447	-18.0097	-17.1599	-15.8904	-17.5797	-12.3872	-13.9356	-21.7355	-15.6081	-15.2053	-14.5815	-16.0889	-15.9618	-13.8487	-18.6975	-17.6772	-15.4479	-16.602	-20.9477	-18.8754	-19.9308	-21.682	-17.7433	-20.3167	-15.7253	-18.8359	-13.9237	-15.7579	-15.9034	-14.7502	-16.6101	-15.3982	-17.0598	-14.4018	-13.2232	-15.0805	-12.3297	-15.3246	-17.3654	-15.819	-17.9068	-18.9105	-16.6224	-18.3692	-20.6891	-19.9034
231.5	622.5	11.1303	4.56868	-14.5931	-13.2554	-14.5014	-11.2391	-15.9396	-13.0737	-7.74105	-14.471	-14.0857	-15.8024	-13.3165	-12.7566	-13.0536	-13.1982	-14.9955	-13.6429	-14.4987	-15.8497	-14.8674	-14.7638	-18.1728	-12.1432	-15.4698	-16.7293	-13.4601	-12.593	-14.7029	-18.2275	-16.4338	-12.4032	-16.0338	-14.9822	-13.5115	-13.1061	-14.7236	-13.8068	-12.8077	-11.9793	-14.0469	-16.3452	-13.3354	-13.8532	-17.2444	-11.2606	-12.9361	-16.7454
232.5	622.5	11.1303	4.56868	-14.5691	-12.4062	-15.2234	-12.217	-12.4473	-13.5889	-9.36273	-13.2233	-12.8643	-15.6396	-11.8134	-14.1728	-12.9318	-11.0702	-13.9578	-12.4593	-13.4596	-14.3946	-15.7751	-12.7149	-20.1304	-11.4807	-14.08	-17.4422	-11.9093	-12.1855	-12.2616	-14.6257	-18.6919	-11.7238	-16.5215	-15.8609	-13.4339	-11.6164	-15.3959	-14.6885	-13.8781	-13.5087	-14.3648	-17.1934	-14.4934	-14.4839	-18.8371	-12.5806	-11.2168	-15.6352
233.5	622.5	11.1304	4.56868	-15.2296	-12.6865	-18.4146	-14.6445	-12.8501	-13.1109	-12.9994	-11.9592	-12.3652	-14.1111	-9.98098	-14.6471	-12.578	-12.3571	-12.412	-11.7347	-15.2081	-14.5141	-18.3111	-11.3304	-23.167	-10.4057	-13.6133	-16.8076	-12.2817	-13.6289	-10.6912	-12.6963	-20.4814	-10.915	-15.6743	-17.1331	-12.6933	-12.3605	-15.838	-17.4994	-15.9743	-15.8206	-14.6822	-17.1733	-14.0726	-12.7747	-18.0108	-13.308	-12.3017	-13.5275
234.5	622.5	11.1305	4.56868	-16.0439	-13.5353	-17.7865	-17.7286	-14.204	-13.4363	-12.7348	-11.7395	-12.6041	-12.6557	-9.81831	-13.9926	-11.5344	-12.8161	-12.114	-11.7136	-16.4241	-17.503	-16.6667	-12.8935	-20.4102	-10.8806	-13.2638	-15.9572	-15.6583	-15.5118	-12.0708	-14.3346	-15.9379	-11.3495	-14.6141	-17.0043	-11.44	-16.328	-16.4162	-19.194	-17.3591	-15.4431	-13.733	-17.0122	-14.0879	-11.1658	-19.9356	-12.8358	-14.9237	-11.3301
235.5	622.5	11.1306	4.56867	-16.3964	-12.2329	-15.1837	-17.4231	-14.5168	-14.3535	-11.8958	-10.9837	-14.8468	-11.7988	-9.45447	-13.5234	-11.314	-12.1907	-12.178	-12.6692	-16.2448	-20.3586	-16.5893	-15.4128	-20.2332	-12.8474	-14.5471	-17.8865	-18.2206	-13.4022	-13.5605	-18.2732	-14.0576	-12.3796	-15.1554	-17.8821	-11.8368	-14.1931	-18.2868	-17.0313	-16.9166	-14.2097	-12.4752	-17.9107	-13.5552	-12.1259	-15.4183	-11.1685	-16.428	-10.9448
236.5	622.5	11.1307	4.56867	-15.2645	-12.4999	-13.4687	-15.0387	-13.4073	-15.0679	-12.2936	-10.2422	-17.1749	-11.3656	-9.18152	-13.8091	-12.3976	-11.8233	-11.9722	-13.2778	-14.373	-17.0506	-16.9078	-16.5714	-23.0354	-12.549	-14.7459	-20.6654	-18.4156	-13.5851	-14.268	-20.8526	-14.3008	-12.7402	-15.9636	-19.6206	-13.4644	-13.8987	-15.2529	-17.5204	-18.9997	-14.2634	-12.7953	-16.7723	-12.7257	-13.1587	-12.9057	-11.8124	-15.274	-12.0945
237.5	622.5	11.1308	4.56867	-11.4119	-14.2331	-13.1023	-14.8808	-13.3707	-13.0001	-14.1063	-10.492	-17.9104	-11.4234	-9.71869	-13.5575	-12.9144	-12.3322	-12.2557	-13.6139	-13.032	-15.8601	-17.0278	-16.6732	-19.9809	-12.8868	-14.5595	-21.5071	-18.2378	-13.5771	-14.7808	-17.5178	-14.7103	-11.9214	-14.669	-16.597	-13.1249	-14.9887	-13.1959	-19.2914	-15.847	-13.4996	-13.921	-14.665	-13.3201	-13.9971	-13.761	-13.9745	-14.4664	-14.0605
231.5	623.5	11.1303	4.56859	-12.8668	-12.2319	-13.6857	-11.733	-13.8394	-13.366	-8.56255	-14.9636	-15.2163	-15.2281	-13.8466	-11.8546	-12.2616	-14.4225	-14.67	-13.0629	-13.2568	-14.2601	-13.6741	-15.9718	-16.5268	-12.8824	-14.8351	-18.0544	-14.5499	-13.8028	-13.3452	-15.8544	-17.9493	-14.7933	-17.0876	-12.6621	-13.103	-12.8249	-16.7778	-14.8679	-13.8735	-10.9695	-14.8405	-16.9065	-14.6347	-13.3366	-16.9613	-14.458	-14.9448	-16.0925
232.5	623.5	11.1303	4.56859	-13.8194	-11.2694	-15.0979	-12.1736	-11.5599	-13.5946	-10.3908	-13.8889	-14.3145	-13.5154	-13.1059	-12.8652	-11.1836	-12.3818	-14.4513	-12.4879	-11.9284	-13.7354	-14.4112	-15.3058	-17.0717	-11.0364	-14.1399	-19.648	-15.1784	-13.4777	-12.3749	-12.3329	-19.1745	-13.9211	-15.5284	-14.7089	-13.5081	-12.0456	-16.868	-15.1091	-14.0787	-12.974	-15.091	-17.1797	-17.0931	-14.031	-16.8664	-14.7846	-12.7245	-17.0412
233.5	623.5	11.1304	4.56859	-15.1171	-11.6718	-17.1866	-13.3633	-11.8925	-13.7567	-13.4728	-11.8838	-12.7213	-11.5227	-11.9841	-13.7252	-12.627	-13.5019	-13.3408	-13.2086	-13.8871	-16.1101	-14.7874	-14.567	-19.9327	-8.49363	-14.4046	-20.0184	-16.09	-14.4545	-12.1859	-11.927	-19.6138	-12.1624	-15.4696	-18.2125	-13.3859	-12.8503	-14.7447	-16.9079	-15.506	-16.2326	-14.9846	-14.9724	-13.6868	-11.2063	-14.6255	-16.4502	-13.0254	-16.5845
234.5	623.5	11.1305	4.56859	-16.1189	-12.862	-14.734	-15.5963	-13.28	-14.336	-14.8914	-12.6845	-11.8392	-10.2822	-11.0789	-13.7025	-12.7852	-14.0022	-13.859	-13.4662	-16.7591	-16.6946	-15.1678	-15.2515	-17.8911	-8.99461	-13.2691	-19.9948	-16.9646	-14.6438	-12.8201	-14.3278	-16.4513	-12.4073	-16.1194	-14.3552	-13.0251	-13.6233	-14.6506	-16.7325	-17.7406	-16.048	-13.3636	-12.88	-12.6925	-10.0299	-16.0015	-16.1443	-14.1332	-16.0073
235.5	623.5	11.1306	4.56858	-16.5585	-13.1766	-12.4028	-16.3415	-15.2347	-14.9099	-13.981	-11.4709	-13.7286	-10.0922	-9.88387	-13.3793	-12.6088	-14.0141	-14.0171	-14.4511	-15.7083	-15.9724	-15.6421	-16.5071	-16.992	-11.6077	-14.1716	-18.7644	-15.6435	-14.0162	-13.2714	-18.6741	-13.7239	-13.5615	-16.8619	-14.1139	-13.4781	-15.9687	-15.5364	-15.6218	-18.2671	-15.2913	-12.3146	-13.9108	-12.6478	-11.631	-14.6753	-12.4484	-14.7304	-14.5087
236.5	623.5	11.1307	4.56858	-14.5151	-13.5432	-12.222	-14.428	-14.1037	-14.6862	-14.4239	-10.3482	-16.6595	-11.0359	-9.78712	-13.3541	-11.0584	-14.0179	-12.7849	-16.0344	-13.5283	-14.7627	-15.392	-17.2067	-18.0928	-13.1751	-15.3035	-17.7594	-15.8737	-14.0174	-13.1161	-21.4423	-12.4571	-13.1397	-16.2455	-15.5999	-14.3717	-15.7916	-13.7393	-16.3204	-15.5434	-14.1149	-12.8188	-12.8995	-12.7168	-13.9153	-14.1563	-12.5126	-14.6651	-14.4121
237.5	623.5	11.1308	4.56858	-11.5333	-14.6935	-14.6229	-14.1847	-13.4568	-12.1706	-15.2338	-10.2164	-18.4744	-11.788	-11.3425	-13.1114	-9.05151	-14.6321	-11.911	-16.5634	-12.6944	-14.9268	-15.1251	-16.4717	-18.8501	-13.8684	-15.6419	-16.954	-16.4657	-13.3023	-12.8072	-18.8537	-12.7813	-11.0472	-14.883	-16.0823	-13.5997	-13.1452	-12.5489	-18.1876	-13.3211	-13.5415	-13.5786	-11.319	-12.7802	-16.3245	-14.9783	-14.7918	-15.0649	-14.5701
231.5	624.5	11.1302	4.5685	-11.6641	-12.6407	-14.7851	-12.4051	-12.4078	-12.5689	-9.69679	-15.1552	-16.9556	-13.02	-12.3141	-11.3279	-11.1041	-16.6733	-13.8447	-13.4259	-11.6741	-13.872	-14.7174	-16.4103	-11.9701	-15.1217	-14.2786	-16.2332	-15.1399	-14.9043	-12.3183	-13.1284	-17.5572	-18.1293	-16.1573	-12.1264	-12.3538	-12.3042	-15.6325	-15.4171	-15.7355	-9.59117	-16.2592	-15.0794	-15.7718	-13.7291	-16.3588	-17.0684	-19.1813	-15.3066
232.5	624.5	11.1303	4.5685	-12.2192	-11.4363	-16.4616	-12.7929	-11.417	-12.5086	-11.0964	-14.6462	-16.8794	-11.2429	-12.8706	-11.7063	-11.4208	-17.1345	-13.5678	-13.2676	-11.255	-13.0093	-13.213	-17.0854	-12.6157	-12.8214	-14.7364	-16.1704	-18.5096	-14.8238	-12.2081	-11.7226	-18.9044	-18.5569	-14.0308	-13.0284	-14.821	-10.7318	-15.7291	-13.7452	-16.0633	-11.431	-16.1988	-17.6585	-18.3581	-15.8488	-12.6251	-14.6577	-15.9861	-16.6213
233.5	624.5	11.1304	4.5685	-13.2114	-11.6094	-16.3918	-13.1986	-11.386	-13.2277	-13.2102	-13.0761	-15.5863	-10.7085	-13.3491	-12.4718	-13.6581	-15.8067	-13.9622	-14.9456	-13.5521	-12.9018	-12.308	-16.8645	-15.8338	-10.2613	-14.0645	-16.2478	-21.4411	-14.925	-11.4049	-12.2464	-15.9462	-15.7998	-14.2537	-14.1601	-16.1331	-11.5809	-14.1469	-13.1892	-16.3656	-13.6444	-13.8371	-15.6227	-15.0232	-13.7761	-11.8152	-15.482	-15.1821	-15.093
234.5	624.5	11.1305	4.5685	-15.3044	-12.7757	-13.9776	-12.969	-12.1336	-14.8129	-15.1379	-13.751	-13.8168	-10.1914	-13.554	-13.5462	-13.4978	-15.0176	-15.9579	-15.6309	-16.9929	-12.6568	-12.8325	-16.0571	-16.4227	-10.4392	-13.1534	-18.2255	-18.0035	-14.5726	-11.7082	-14.6045	-13.0282	-14.7512	-14.7841	-12.2101	-16.2916	-16.0996	-14.5294	-12.8097	-16.5906	-13.6553	-13.1083	-12.7587	-14.9749	-13.0402	-13.6186	-16.4654	-15.6537	-13.4913
235.5	624.5	11.1306	4.5685	-15.5684	-14.7315	-11.5523	-12.7155	-14.4842	-17.4929	-16.1568	-12.4043	-14.1018	-10.2195	-13.1712	-14.2322	-11.5976	-15.5567	-15.6988	-15.3441	-15.655	-13.3028	-14.1141	-15.5524	-16.7385	-12.7003	-14.4	-17.4638	-14.631	-14.9149	-12.4995	-17.7193	-11.3816	-14.7097	-14.833	-12.2491	-14.6925	-18.638	-16.1023	-13.2977	-14.8158	-12.4743	-13.5418	-13.7974	-15.6438	-13.3879	-15.205	-15.3787	-16.1221	-13.542
236.5	624.5	11.1307	4.56849	-13.9881	-14.7981	-11.1449	-12.9028	-14.9935	-14.3134	-16.8763	-10.3545	-15.5007	-11.3837	-13.0967	-13.397	-9.4325	-15.805	-13.8699	-15.5757	-13.8489	-13.7211	-14.3027	-15.1957	-17.6633	-15.2643	-16.3977	-15.9577	-13.9531	-14.8886	-12.2509	-19.3166	-11.2761	-14.0417	-14.6722	-13.8284	-14.3325	-13.7459	-15.7964	-14.5168	-12.698	-12.0804	-14.8872	-12.7655	-15.1057	-14.5099	-15.7513	-15.3615	-16.1467	-14.4123
237.5	624.5	11.1308	4.56849	-12.7032	-13.9506	-13.4564	-13.5984	-14.1678	-11.9193	-15.0021	-9.91974	-16.0821	-12.5597	-14.6977	-11.9366	-8.16025	-16.1531	-12.6933	-15.4099	-13.574	-14.5747	-14.1983	-14.6009	-18.405	-16.8297	-17.2748	-15.1146	-14.4937	-13.254	-11.0972	-17.6754	-12.506	-12.803	-14.8471	-16.622	-15.0871	-10.5467	-14.1203	-15.6683	-12.4991	-12.3325	-15.7325	-11.1894	-14.0626	-15.8836	-16.5162	-16.3731	-15.6138	-13.9993
231.5	625.5	11.1302	4.56841	-10.476	-13.8806	-18.638	-13.1056	-12.0278	-12.2707	-10.6913	-14.0805	-17.3751	-11.323	-11.436	-10.245	-11.9236	-15.3693	-14.5138	-14.3723	-12.3323	-14.4352	-14.7444	-13.2607	-10.8464	-16.569	-14.0149	-15.1385	-14.192	-15.2574	-12.417	-12.3429	-15.9169	-20.4083	-14.4027	-13.1308	-12.21	-11.2868	-12.6551	-15.8634	-15.0817	-10.3384	-17.4188	-15.5874	-16.6199	-14.2078	-11.1924	-15.2421	-17.2238	-14.677
232.5	625.5	11.1303	4.56841	-10.0682	-12.8457	-18.6285	-14.8281	-11.087	-11.57	-11.0997	-12.3354	-18.6045	-10.0624	-11.9342	-10.7015	-13.1203	-13.481	-14.3114	-14.6147	-12.9884	-13.6701	-12.7237	-14.213	-11.2859	-14.5785	-13.9355	-16.1865	-17.3957	-14.8093	-12.7253	-12.7676	-16.8643	-20.0759	-12.3609	-12.3823	-15.7368	-10.469	-12.7639	-12.4213	-15.8311	-11.7449	-17.739	-18.4295	-17.41	-14.8665	-9.33879	-13.5634	-18.4221	-14.3816
233.5	625.5	11.1304	4.56841	-10.6305	-12.2289	-16.5397	-14.273	-10.7887	-11.4816	-11.9263	-12.1925	-18.137	-10.9256	-12.5775	-12.5691	-13.6414	-12.7524	-15.9411	-16.229	-15.588	-12.2281	-12.4051	-14.7936	-13.6796	-12.9288	-14.2363	-17.2318	-21.6981	-14.9934	-11.6772	-13.1602	-15.2116	-16.0795	-12.6627	-12.6644	-16.9678	-11.929	-13.3991	-11.7329	-15.7271	-12.9059	-14.3865	-16.2553	-17.3064	-14.5292	-10.7585	-13.1065	-19.1278	-12.5244
234.5	625.5	11.1305	4.56841	-12.6367	-12.2416	-14.4407	-12.4187	-10.9248	-12.0313	-13.0543	-12.4464	-15.091	-11.5889	-13.3892	-15.4318	-11.6132	-13.1669	-16.6405	-15.9104	-16.5467	-11.7653	-14.0191	-15.7849	-15.7365	-13.0288	-14.233	-18.47	-19.2024	-14.6988	-11.6481	-14.4299	-13.5298	-14.1638	-12.4406	-12.5395	-15.4825	-13.6657	-14.909	-12.4489	-14.0753	-12.1578	-13.9599	-15.9013	-18.4999	-15.1202	-13.8988	-12.5438	-19.8389	-11.1839
235.5	625.5	11.1306	4.56841	-13.4988	-13.4522	-12.2068	-11.6662	-11.8276	-13.6902	-15.2991	-11.9677	-12.9375	-12.6935	-15.7474	-16.361	-9.12106	-14.4137	-15.8782	-14.3809	-14.8855	-13.0217	-15.7319	-15.8753	-17.6964	-13.797	-14.3465	-16.6816	-15.4373	-15.0801	-12.2268	-16.4074	-12.2247	-13.9573	-11.9986	-12.8826	-13.9128	-14.5475	-17.3313	-13.6143	-11.8668	-11.4547	-15.0079	-16.409	-20.0404	-15.4077	-15.7513	-13.1881	-19.3784	-11.8999
236.5	625.5	11.1307	4.5684	-13.4864	-13.5894	-11.5192	-11.8621	-12.7165	-12.5121	-15.07	-9.59943	-12.2952	-13.6692	-19.3668	-12.7679	-7.71103	-15.3548	-15.3155	-13.3382	-14.2044	-14.2434	-15.3096	-14.0865	-18.6906	-14.9162	-14.9453	-15.0784	-14.3317	-15.5205	-11.698	-18.2917	-12.2771	-14.6502	-11.806	-14.0479	-13.6612	-12.0819	-16.8894	-13.9638	-10.8938	-11.8545	-15.7001	-14.1223	-17.7338	-14.5102	-15.6146	-14.9965	-18.2542	-13.4802
237.5	625.5	11.1308	4.5684	-12.9261	-13.0956	-12.9642	-12.3238	-13.3819	-11.2635	-12.861	-9.27853	-12.4109	-13.0232	-18.8454	-10.2191	-9.55168	-17.06	-14.8394	-13.3225	-14.4171	-15.041	-14.9207	-13.9021	-16.5945	-15.603	-16.1502	-14.6304	-13.9859	-13.5474	-9.97238	-16.3804	-14.6137	-15.6406	-12.018	-15.6683	-15.1272	-10.3376	-14.7181	-14.7265	-12.1388	-12.238	-14.6149	-12.0223	-15.2486	-15.191	-14.9952	-15.0143	-13.4277	-13.9589
231.5	626.5	11.1302	4.56832	-9.62497	-15.2118	-15.3609	-12.4793	-11.7287	-12.9059	-11.5522	-12.5171	-18.8958	-11.2801	-11.2043	-8.76173	-13.6088	-14.1787	-16.1268	-14.7421	-13.0202	-14.0865	-12.8038	-13.093	-11.3434	-14.6848	-13.4058	-15.069	-13.5643	-15.6212	-13.6082	-12.8181	-12.8987	-17.1607	-15.1785	-15.284	-13.3372	-11.6819	-13.0409	-12.932	-12.3438	-14.3292	-15.1338	-16.0667	-14.5341	-14.306	-9.00134	-13.0894	-17.0574	-15.3023
232.5	626.5	11.1303	4.56832	-9.37009	-14.5035	-15.2964	-14.5792	-11.2095	-11.3475	-11.414	-11.0962	-17.4147	-10.4027	-10.9551	-9.70585	-14.0031	-12.6428	-16.2971	-14.7626	-13.3869	-14.8832	-12.4491	-11.7626	-11.5384	-13.8782	-13.0319	-18.4579	-15.0985	-15.0609	-14.8142	-14.089	-13.7806	-16.8335	-12.6617	-13.8124	-14.4554	-10.8616	-12.8872	-11.3934	-13.3364	-14.5237	-16.0244	-17.7477	-14.7532	-13.5743	-8.95346	-12.2514	-20.5177	-14.0363
233.5	626.5	11.1304	4.56832	-10.1811	-13.1651	-14.8377	-13.3781	-11.0265	-10.7093	-12.1831	-10.9822	-16.1192	-11.3344	-11.2087	-11.6958	-12.9917	-11.9122	-18.2611	-16.1275	-14.6721	-14.6829	-12.8385	-12.0415	-13.3168	-13.5344	-14.1096	-22.2697	-17.0308	-14.6993	-14.3443	-14.5388	-15.199	-14.7444	-11.351	-14.2444	-13.7444	-10.4811	-13.325	-11.8826	-13.3672	-13.5301	-15.6598	-17.4037	-15.3896	-13.485	-11.6055	-12.6725	-19.8886	-12.2651
234.5	626.5	11.1305	4.56832	-12.1826	-12.241	-13.928	-11.8304	-11.2593	-10.6612	-13.3081	-11.3839	-14.7694	-12.2578	-12.0667	-14.3362	-10.8475	-12.4308	-18.395	-17.6374	-14.4132	-15.6891	-14.324	-13.4084	-15.1261	-13.323	-14.1179	-18.8271	-17.7775	-13.993	-13.4848	-14.4698	-16.6822	-13.3366	-10.9411	-14.015	-12.6568	-11.877	-14.5973	-13.0406	-11.6777	-12.2501	-15.7113	-16.9452	-15.862	-14.0902	-14.6445	-13.4744	-19.6189	-12.0432
235.5	626.5	11.1306	4.56832	-13.1198	-12.6989	-12.315	-10.7136	-11.6264	-12.0495	-13.5604	-12.3622	-12.6832	-13.0008	-15.5049	-14.4477	-8.61068	-13.335	-16.8766	-15.4757	-13.1588	-16.1196	-16.3545	-15.4972	-15.3741	-12.8521	-13.0936	-15.8157	-17.3585	-13.846	-13.015	-14.4626	-17.3015	-13.9268	-11.2357	-14.25	-12.4498	-13.4764	-16.1633	-12.7993	-10.2464	-12.0057	-15.9708	-15.3496	-16.0581	-14.6739	-14.5813	-13.4387	-18.3474	-14.4441
236.5	626.5	11.1307	4.56832	-13.0892	-12.7543	-12.3282	-9.66239	-11.7173	-11.8088	-12.6223	-10.4005	-10.3861	-14.6466	-18.3479	-10.9982	-8.63422	-14.5171	-16.5178	-12.8208	-13.7281	-16.1924	-16.7158	-14.4319	-13.9801	-13.2254	-12.5298	-14.5982	-17.4492	-14.3838	-12.8738	-17.9169	-16.2042	-15.8774	-12.1615	-14.7063	-12.9724	-11.6477	-16.3449	-12.5804	-10.2936	-13.1672	-15.9171	-13.7514	-16.7272	-13.6454	-14.2626	-14.1486	-16.1806	-13.4054
237.5	626.5	11.1308	4.56831	-11.8644	-13.0056	-13.5616	-10.0439	-11.7129	-10.476	-11.6158	-9.67883	-10.9674	-13.7614	-17.2863	-8.97207	-12.6363	-15.4685	-15.071	-13.0701	-14.8183	-16.7525	-16.7807	-15.1055	-12.8465	-14.2541	-12.1409	-15.0486	-15.8966	-14.3463	-10.9814	-16.6799	-19.2069	-14.1089	-12.7008	-14.5007	-14.1693	-10.0926	-14.6593	-14.361	-12.2692	-13.2601	-13.6107	-12.6552	-16.4592	-15.1952	-13.7557	-13.8981	-12.7533	-13.2106
303.5	708.5	11.1366	4.5609	-13.0607	-12.6039	-13.9058	-14.4907	-13.7796	-15.2386	-14.999	-16.802	-12.7639	-15.5277	-11.0249	-11.2031	-17.713	-12.9365	-16.2304	-16.2381	-12.7745	-17.1288	-13.8436	-12.4791	-15.7795	-15.9646	-17.9681	-13.9405	-13.3568	-14.2643	-14.3857	-14.53	-15.3364	-14.9354	-15.1265	-17.608	-17.1789	-14.7314	-13.7956	-13.8303	-13.5381	-15.2004	-14.5053	-16.4749	-16.5973	-17.3436	-14.076	-16.8613	-16.4536	-15.9002
304.5	708.5	11.1367	4.5609	-12.9679	-16.7903	-15.0751	-17.8894	-13.7578	-14.6949	-14.3281	-14.1666	-12.335	-15.9326	-13.1188	-10.5417	-17.7651	-14.6163	-15.1449	-16.1893	-13.9203	-19.4021	-13.8166	-14.1036	-16.5794	-16.0491	-18.767	-13.1822	-14.0659	-13.6877	-17.0785	-13.8447	-16.0258	-14.9876	-14.965	-16.2823	-16.3189	-13.922	-18.0454	-15.3687	-13.8039	-13.5835	-13.7472	-15.9161	-14.5906	-19.1264	-13.5958	-19.1086	-17.9551	-17.2551
305.5	708.5	11.1368	4.5609	-12.7687	-18.0078	-14.5688	-18.7823	-9.2883	-11.023	-12.8327	-15.3518	-13.5028	-16.2794	-15.5269	-12.397	-16.4447	-14.5336	-14.5665	-15.0065	-13.8525	-18.0608	-15.1758	-15.2677	-17.369	-17.7307	-17.1532	-16.0073	-14.9005	-16.3352	-15.4278	-13.876	-19.2979	-15.7835	-16.4839	-15.9646	-17.3566	-15.985	-22.751	-16.8205	-14.6886	-13.6028	-15.1303	-16.379	-14.1525	-19.521	-14.4198	-17.773	-17.0564	-16.1507
306.5	708.5	11.1369	4.5609	-13.3739	-16.1825	-14.6127	-17.6101	-8.31686	-9.98024	-12.0689	-18.4854	-14.0415	-16.0327	-18.1062	-12.7783	-13.4871	-16.8308	-15.4595	-14.3568	-14.4916	-15.3446	-18.6592	-16.1729	-18.1997	-19.4387	-17.943	-19.5954	-15.93	-18.9219	-14.0803	-16.0355	-18.9823	-14.6348	-20.4629	-16.3139	-16.151	-17.7702	-20.9705	-19.6987	-15.7241	-14.6984	-16.9928	-15.9329	-14.5245	-18.1003	-14.6622	-15.3067	-15.3356	-15.2668
303.5	709.5	11.1366	4.56081	-10.7866	-16.269	-12.6832	-12.5914	-13.6805	-13.0675	-16.8181	-16.1523	-15.1474	-16.0964	-12.3189	-10.9628	-17.274	-14.8068	-15.8072	-16.5105	-14.2581	-15.0031	-15.3934	-12.5587	-16.1298	-13.838	-15.5895	-15.4551	-11.5104	-14.3153	-14.4494	-16.6947	-15.2707	-13.5394	-14.0966	-18.3677	-16.8953	-12.3171	-12.2249	-12.8043	-13.2024	-13.5848	-15.4794	-16.1831	-13.4642	-16.6015	-12.3606	-15.0303	-14.8835	-17.7356
304.5	709.5	11.1367	4.56081	-11.4519	-19.5604	-15.9893	-15.559	-16.4936	-14.5652	-16.7131	-15.4713	-15.5353	-17.2214	-14.297	-12.1634	-16.9055	-14.4478	-15.1295	-14.4283	-14.7599	-15.3536	-15.7787	-14.3824	-15.7676	-13.513	-13.8921	-14.6566	-12.7658	-13.1076	-13.1044	-15.5774	-16.1941	-15.4793	-14.0219	-18.2872	-16.289	-14.6817	-15.4425	-13.4486	-14.6643	-14.0033	-15.8602	-15.1638	-12.4599	-17.6002	-13.6593	-16.2055	-15.8197	-16.2556
305.5	709.5	11.1368	4.56081	-12.9092	-18.7024	-16.5048	-18.0718	-10.2624	-13.3087	-13.2753	-16.6334	-15.7893	-16.0087	-16.3967	-14.759	-16.569	-13.3967	-14.6606	-13.087	-14.3343	-14.6839	-16.6859	-15.1301	-17.4402	-14.8253	-13.5061	-15.9108	-15.144	-14.2959	-12.3993	-16.7094	-17.1066	-17.0228	-15.7735	-17.7909	-17.6389	-17.8586	-19.1021	-15.4174	-16.7635	-14.3819	-19.0022	-13.6728	-12.9834	-17.5733	-15.0577	-15.7584	-14.9366	-14.0996
306.5	709.5	11.1369	4.56081	-14.3346	-18.2975	-14.2054	-19.9698	-10.1893	-11.3069	-12.265	-17.9512	-14.615	-14.0591	-16.7397	-12.9874	-14.3893	-14.9006	-15.5167	-12.7412	-14.0018	-14.533	-17.1645	-15.4267	-17.9907	-17.5702	-15.6452	-17.4124	-15.8291	-16.4883	-12.8478	-19.2911	-15.9146	-15.1601	-18.6874	-15.5678	-17.26	-19.0374	-18.8977	-18.5674	-15.9901	-13.3463	-17.0475	-13.2238	-14.8721	-15.4286	-15.2656	-14.0969	-14.004	-12.8603
307.5	709.5	11.1369	4.56081	-11.7284	-15.4053	-11.6646	-17.018	-14.5378	-9.5534	-13.4143	-19.8176	-15.6936	-13.1249	-13.8615	-12.1544	-13.619	-18.3282	-17.681	-13.4037	-14.3307	-16.0092	-17.643	-16.2677	-14.7457	-18.2135	-14.8168	-17.2907	-16.1432	-16.666	-12.5272	-18.6935	-14.2346	-13.1852	-16.7697	-15.0608	-15.0283	-17.2258	-18.249	-19.4513	-12.8339	-11.4411	-14.4893	-13.8889	-15.2614	-15.0009	-15.5233	-13.6612	-14.2276	-13.0752
308.5	709.5	11.137	4.56081	-11.3835	-13.9886	-13.4668	-15.2296	-19.4775	-10.0364	-13.8748	-19.3286	-15.9692	-13.8778	-13.0602	-13.8602	-16.2355	-21.8177	-18.4038	-13.8903	-15.1564	-17.3651	-17.9574	-16.6377	-14.1008	-16.6724	-13.8147	-16.9601	-15.9352	-15.8242	-11.9601	-15.8772	-13.5127	-13.1191	-12.8702	-16.5352	-14.0595	-16.335	-15.9756	-17.3688	-11.3148	-10.2848	-14.5051	-14.0551	-13.7309	-17.0365	-16.7103	-14.6531	-14.3383	-14.7171
303.5	710.5	11.1366	4.56072	-10.1301	-17.9226	-14.8373	-11.523	-13.1892	-12.2347	-18.5467	-15.2291	-16.541	-15.462	-12.8483	-11.3498	-16.2673	-16.5475	-15.1455	-14.6817	-15.8954	-15.7168	-18.2533	-16.5933	-16.3994	-13.6699	-15.8056	-17.2884	-9.69922	-13.8936	-12.7201	-17.8437	-15.271	-11.8148	-13.8808	-16.0156	-16.509	-13.3496	-13.5228	-12.0811	-14.2567	-12.3487	-16.0376	-17.1844	-12.5858	-15.3785	-13.826	-15.8665	-16.6083	-18.4093
304.5	710.5	11.1367	4.56072	-11.8068	-18.4001	-18.6719	-13.4778	-14.9524	-13.9104	-18.2062	-15.3821	-16.7085	-14.5789	-13.9602	-13.1618	-17.1506	-14.9607	-14.0538	-12.6627	-15.0153	-15.6967	-16.4341	-16.2128	-16.0727	-14.0097	-13.8881	-15.8511	-10.8388	-11.9668	-11.223	-16.5753	-14.5922	-12.5241	-13.6852	-19.9597	-15.5488	-17.7881	-16.6066	-12.7476	-15.0726	-13.4285	-17.4413	-15.675	-12.6721	-16.3413	-15.3028	-16.8482	-16.2658	-15.2763
305.5	710.5	11.1368	4.56072	-12.9417	-19.3543	-18.9567	-16.6039	-12.0595	-15.9836	-15.3304	-16.6019	-16.0584	-14.4193	-15.1573	-14.6724	-15.3534	-13.0559	-14.8295	-11.0686	-13.7541	-15.6461	-14.2698	-15.0956	-17.0846	-14.6114	-13.2456	-15.6454	-12.5003	-11.3354	-11.1859	-17.3227	-14.3892	-13.8918	-14.8289	-20.6268	-16.2809	-18.6869	-17.3572	-14.0763	-15.8699	-13.529	-18.9059	-13.0037	-13.8629	-15.3565	-16.0304	-15.7088	-14.8066	-12.9643
306.5	710.5	11.1369	4.56072	-12.8963	-20.6747	-15.2546	-19.9689	-12.6716	-12.4146	-12.9358	-16.1184	-16.0595	-12.8816	-14.4528	-12.7864	-14.3136	-12.89	-17.5652	-10.5582	-13.167	-16.5055	-13.3396	-15.5589	-18.0139	-15.7712	-15.0259	-16.3832	-13.9101	-11.8311	-12.2728	-17.381	-14.1432	-13.9452	-16.1903	-15.796	-16.886	-17.4118	-16.5974	-14.6309	-15.6172	-12.6461	-15.522	-12.7408	-15.7982	-13.3167	-15.5329	-13.7544	-14.3007	-12.3805
307.5	710.5	11.1369	4.56072	-11.5425	-15.9294	-12.5932	-16.8313	-14.431	-10.0615	-12.7196	-16.7028	-17.0337	-11.4499	-12.883	-11.988	-14.6182	-14.4663	-20.4461	-12.5835	-14.0706	-17.4047	-14.7494	-18.0733	-17.3678	-16.8376	-15.4182	-16.7803	-14.3462	-14.2102	-12.8625	-15.2624	-14.4574	-13.5976	-15.0923	-14.2671	-15.1547	-15.9238	-17.5197	-13.7355	-14.4298	-11.7997	-13.8791	-13.8166	-15.9197	-12.6932	-15.3162	-12.7889	-14.8787	-13.9149
308.5	710.5	11.137	4.56072	-11.0847	-15.4002	-14.1812	-16.355	-14.0156	-11.5434	-13.3722	-15.6982	-15.6167	-12.4017	-12.8412	-13.2806	-16.6219	-16.1089	-19.41	-15.2164	-15.4806	-17.7457	-16.4112	-18.5184	-17.3472	-17.1363	-13.9882	-15.7152	-14.3228	-16.7938	-13.4709	-14.3068	-15.5527	-16.1218	-12.4299	-15.0987	-13.8531	-15.2588	-17.9242	-13.3307	-13.8046	-11.7382	-14.9104	-14.6742	-14.4522	-14.7954	-17.0431	-13.9822	-13.9721	-16.6905
302.5	711.5	11.1365	4.56064	-12.0479	-16.4373	-14.7111	-12.4542	-9.87903	-14.8307	-17.8721	-15.7577	-16.9992	-14.9164	-15.3626	-11.8419	-14.4125	-14.9145	-19.5373	-15.9841	-15.779	-15.6752	-18.8785	-21.0159	-14.3341	-14.6814	-13.4305	-16.8438	-10.5994	-15.6331	-14.9647	-20.6268	-14.5103	-11.8442	-14.7534	-12.7717	-15.5485	-13.4695	-13.6134	-14.0911	-15.0904	-13.2631	-14.2498	-14.7188	-13.2761	-19.8811	-16.7602	-20.7035	-17.1226	-16.1111
303.5	711.5	11.1366	4.56063	-12.2753	-16.6519	-16.6107	-12.2805	-10.368	-12.6247	-17.8435	-16.1014	-17.1748	-13.6997	-14.355	-11.7178	-15.1828	-16.773	-14.4935	-14.7065	-15.0791	-17.2904	-17.5249	-19.4773	-13.5711	-15.5292	-14.6298	-15.2492	-10.4569	-13.9861	-13.5114	-19.4337	-12.9	-10.7537	-16.1481	-12.752	-15.5998	-15.6279	-14.6119	-13.4598	-14.5776	-11.8526	-14.9242	-14.6904	-13.181	-16.2073	-16.4154	-21.3814	-17.7122	-15.9423
304.5	711.5	11.1367	4.56063	-14.1845	-16.0497	-17.13	-13.6492	-12.274	-13.6485	-18.6974	-16.1603	-15.5632	-13.1996	-15.183	-13.4664	-14.1809	-14.0012	-12.9459	-12.9398	-13.3939	-18.4324	-15.2072	-15.4388	-14.592	-17.1811	-13.8458	-14.4784	-11.6585	-12.5114	-13.0387	-16.7201	-12.6325	-10.9496	-15.6174	-14.8741	-16.0019	-17.7567	-15.8283	-13.3287	-14.5394	-12.4531	-16.2523	-14.4853	-14.8469	-15.6126	-18.1309	-18.3324	-16.9621	-14.4387
305.5	711.5	11.1368	4.56063	-13.7186	-18.9923	-19.5736	-17.148	-13.5825	-17.94	-16.299	-16.9197	-14.7035	-13.9616	-15.8064	-13.4741	-14.1154	-13.3689	-13.9603	-10.7971	-12.2269	-19.4421	-13.5432	-14.3132	-16.1383	-17.0508	-14.9814	-14.3271	-12.6791	-12.4361	-13.5088	-14.6787	-13.028	-11.7436	-15.0591	-16.3972	-17.3472	-15.9027	-15.2096	-12.6417	-15.3405	-13.3514	-16.3725	-12.75	-15.5932	-13.7474	-17.9311	-13.8324	-15.4843	-13.2598
306.5	711.5	11.1369	4.56063	-11.9226	-21.9358	-15.9998	-19.2391	-13.8621	-13.5942	-14.8941	-14.8213	-16.0087	-13.8717	-14.8081	-12.1517	-13.8394	-12.8792	-17.2314	-9.47486	-12.8914	-18.7886	-13.0812	-16.0809	-16.8162	-15.9143	-16.6498	-15.3781	-12.9222	-13.1379	-13.809	-12.9187	-14.0771	-12.5867	-15.7093	-15.8251	-16.232	-13.9758	-15.2129	-11.2412	-15.7928	-13.413	-14.3673	-12.5365	-15.5146	-11.6126	-15.9316	-11.0311	-14.5496	-13.5275
307.5	711.5	11.1369	4.56063	-13.7533	-17.0746	-13.1924	-16.8604	-12.4754	-12.5856	-14.4922	-14.6293	-17.2483	-12.2582	-13.078	-12.4253	-13.2485	-12.432	-18.3885	-11.7829	-14.9706	-17.6479	-14.5103	-19.2	-16.8257	-15.3142	-15.736	-15.7868	-13.1034	-13.8575	-14.3583	-12.4725	-15.6474	-13.2018	-15.6582	-15.0745	-13.9726	-13.7421	-16.1045	-10.2958	-14.995	-12.7825	-13.0485	-13.8227	-15.9792	-11.5743	-14.4747	-10.3436	-14.2679	-15.3304
304.5	712.5	11.1367	4.56054	-16.3085	-13.8674	-14.8683	-16.2514	-12.1019	-12.8346	-17.0949	-16.3968	-15.6806	-13.3271	-16.1775	-13.7109	-12.8202	-13.9754	-13.4376	-14.6011	-12.5529	-19.3674	-14.8344	-15.5617	-15.2821	-18.7254	-12.4145	-13.2785	-13.2352	-14.5304	-15.7509	-15.9109	-11.9862	-11.879	-20.2761	-11.9358	-16.0344	-15.2992	-14.0084	-13.4335	-13.7645	-12.3819	-15.6034	-12.697	-16.1057	-15.5016	-18.2851	-16.7363	-18.3194	-13.5701
305.5	712.5	11.1368	4.56054	-14.9715	-17.4438	-19.4734	-18.5105	-14.1391	-17.3847	-15.1458	-16.1302	-15.0671	-13.8052	-15.6357	-12.2713	-13.5623	-14.5415	-14.9822	-12.2729	-12.3489	-20.6492	-13.5924	-15.3813	-16.3049	-18.7383	-14.3676	-13.317	-12.4736	-14.5461	-15.1901	-12.6661	-12.9709	-14.1132	-20.3339	-13.786	-17.5493	-13.5834	-14.1914	-12.378	-14.8505	-13.4431	-15.9848	-12.5253	-16.3979	-13.3407	-19.0855	-12.3776	-16.3783	-13.1733
306.5	712.5	11.1369	4.56054	-12.7207	-21.2587	-15.863	-16.6168	-13.5837	-15.5732	-16.0815	-13.56	-17.0267	-15.9784	-15.3723	-11.8275	-14.3263	-13.8743	-17.1152	-11.101	-14.2228	-19.6753	-13.4703	-18.4892	-15.6377	-16.6743	-17.578	-14.061	-11.7348	-14.757	-15.0291	-11.4653	-14.9193	-13.8143	-18.8564	-15.9584	-15.121	-13.1465	-14.9938	-11.5173	-15.9359	-12.5407	-13.7972	-13.2334	-15.874	-11.3577	-16.4056	-10.2548	-14.2538	-13.6634
307.5	712.5	11.1369	4.56054	-14.7009	-17.5653	-14.3835	-16.2006	-11.8274	-14.1864	-16.7407	-12.9921	-15.6164	-15.0851	-13.8647	-13.3667	-12.7985	-11.3414	-15.9018	-12.5925	-16.9291	-18.3519	-15.548	-21.3292	-15.011	-14.4517	-15.344	-14.7795	-12.1704	-14.4667	-14.4107	-12.4351	-18.886	-12.6278	-17.2633	-14.9863	-13.5448	-14.9792	-14.6567	-10.1786	-15.7904	-11.414	-12.7177	-14.4583	-16.3437	-11.3253	-14.3355	-10.4188	-13.7093	-15.3715
307.5	713.5	11.1369	4.56045	-13.8742	-17.1622	-14.2374	-15.6727	-13.2639	-15.8633	-15.8407	-13.2412	-14.979	-15.0062	-13.7909	-13.875	-14.1856	-11.2667	-15.6925	-15.6078	-18.806	-16.9093	-13.9543	-21.4698	-14.5902	-14.1839	-14.2811	-14.1103	-11.1037	-14.7773	-12.0211	-13.1599	-23.597	-11.2836	-16.3514	-12.2842	-13.2992	-16.7721	-13.0445	-11.8829	-17.6193	-12.2857	-13.279	-15.9744	-18.1783	-12.2142	-15.9336	-13.6629	-14.9622	-17.0184
276.5	749.5	11.1341	4.55726	-16.8656	-17.8475	-16.6591	-16.369	-14.0049	-15.1266	-20.5755	-16.4302	-11.9308	-17.7498	-12.8043	-23.5103	-13.5648	-14.8955	-18.6166	-14.4766	-18.8544	-21.0375	-11.7005	-16.9869	-15.2422	-13.9789	-13.2318	-14.3916	-15.7601	-15.1876	-11.9288	-17.0608	-18.5774	-13.2298	-15.3064	-11.5636	-14.2029	-15.4933	-16.6619	-11.4915	-13.0435	-13.4531	-15.1479	-11.9054	-16.8144	-18.7339	-26.391	-16.6096	-11.3244	-17.2239
275.5	750.5	11.134	4.55717	-14.9531	-18.7435	-16.376	-14.8671	-13.6019	-16.9596	-15.6871	-15.6638	-13.847	-14.4596	-12.7186	-16.5647	-13.2453	-18.8847	-15.0352	-12.6439	-15.1298	-19.1447	-13.7827	-12.396	-16.3368	-12.4334	-12.8602	-13.4671	-16.7554	-17.5462	-14.6463	-14.9399	-17.9828	-18.8882	-19.3487	-14.0463	-14.3218	-14.5057	-17.9467	-12.7317	-13.94	-14.4893	-19.94	-13.4363	-18.4825	-16.8112	-22.5747	-16.634	-9.43128	-14.5715
276.5	750.5	11.1341	4.55717	-17.4185	-19.5818	-15.3563	-15.6724	-13.7046	-17.0968	-15.8441	-16.1029	-13.1538	-16.5613	-11.9949	-16.4678	-13.6445	-15.4501	-16.8042	-15.8898	-18.588	-18.7816	-13.1253	-17.4129	-17.4747	-13.2529	-12.2625	-14.6674	-18.3053	-16.7275	-14.412	-16.5369	-16.8671	-14.7487	-17.1173	-11.225	-13.5815	-15.4258	-16.9573	-13.3979	-15.8796	-14.1706	-19.0447	-11.9379	-18.8096	-16.7995	-23.1502	-17.5539	-9.92255	-14.8388
277.5	750.5	11.1342	4.55717	-14.6613	-17.4476	-14.2436	-15.8074	-14.1194	-14.6083	-19.3102	-15.9455	-13.0765	-21.2807	-13.5902	-16.1285	-12.6411	-18.5318	-17.0889	-16.6656	-18.6162	-15.4566	-13.4989	-18.0264	-18.6652	-13.4329	-13.4653	-14.2171	-19.2673	-15.244	-13.9837	-16.3794	-14.6143	-12.0036	-14.7635	-8.82012	-14.2858	-15.3672	-15.4281	-13.5955	-16.7826	-11.6917	-17.206	-13.3371	-18.3576	-14.7995	-20.7866	-20.2101	-11.8364	-15.3573
274.5	751.5	11.134	4.55708	-14.0498	-15.8731	-15.0202	-15.0474	-13.1983	-14.7961	-14.6229	-17.4687	-16.444	-14.5491	-12.4696	-14.9591	-12.5503	-16.7757	-12.5004	-14.1863	-16.5749	-17.6059	-11.6217	-13.8461	-16.849	-13.6873	-13.7729	-13.597	-17.3967	-16.636	-11.1556	-13.9105	-14.7563	-17.4709	-14.2354	-14.3431	-16.9139	-13.7003	-16.3228	-16.3085	-15.1209	-13.2175	-17.1121	-15.2408	-16.6508	-16.0786	-15.7198	-15.7156	-10.6557	-12.9939
275.5	751.5	11.134	4.55708	-15.863	-18.0572	-14.7478	-17.3734	-13.5789	-15.6246	-13.2142	-18.0794	-17.4082	-13.266	-11.8712	-13.3906	-12.5052	-18.8949	-15.3371	-15.5321	-18.1963	-17.4799	-14.328	-16.3166	-15.9979	-12.6825	-13.4917	-14.2356	-17.0898	-18.2868	-13.6021	-17.5314	-13.8879	-19.4324	-16.6752	-13.5619	-15.1739	-15.6515	-17.7905	-15.1794	-18.1952	-16.1715	-17.0931	-14.3095	-16.5735	-15.9053	-17.3318	-17.4393	-10.2172	-12.7781
276.5	751.5	11.1341	4.55708	-17.7403	-18.7027	-14.3296	-16.0498	-14.5728	-18.3172	-14.0337	-18.5784	-15.2209	-13.9841	-12.0223	-13.3531	-14.1881	-17.0301	-16.8927	-18.1986	-17.5818	-17.6805	-15.8588	-20.1277	-18.2238	-13.5104	-12.7691	-17.3449	-19.1057	-18.6702	-16.4622	-17.1909	-14.0009	-17.4751	-16.4203	-11.3532	-14.2799	-18.2309	-18.1437	-15.4399	-18.5753	-15.9445	-16.791	-14.617	-17.9552	-15.498	-17.5789	-18.4761	-10.652	-12.9602
277.5	751.5	11.1342	4.55708	-13.6704	-17.1854	-14.6609	-15.0755	-14.8684	-16.9123	-17.0945	-17.1066	-14.8805	-17.33	-13.1688	-13.911	-12.9431	-18.36	-15.1701	-15.318	-17.819	-14.9976	-15.4887	-20.0305	-19.597	-15.1838	-13.3755	-15.7143	-20.8846	-16.3145	-16.6045	-16.2309	-13.5126	-14.2972	-15.7908	-9.51817	-15.8072	-17.0468	-16.1547	-14.0636	-16.0495	-13.5493	-18.124	-18.5338	-17.7083	-14.0503	-17.1343	-19.9072	-11.6976	-13.7497
278.5	751.5	11.1343	4.55708	-10.4172	-16.4684	-15.4943	-14.0337	-14.0562	-16.8845	-17.1369	-15.8543	-17.3893	-19.1392	-14.6332	-15.1534	-12.5595	-17.0517	-14.814	-16.4095	-17.859	-14.9599	-14.7887	-17.0826	-19.2445	-16.9579	-15.2108	-16.7803	-17.1663	-13.403	-15.5961	-16.7075	-12.4069	-13.3646	-16.6987	-9.09624	-12.5792	-14.9384	-15.0816	-15.4379	-16.4431	-13.4295	-18.3795	-20.2863	-18.1282	-14.5061	-16.4375	-17.7489	-13.9501	-15.1739
273.5	752.5	11.1339	4.55699	-13.1377	-14.3605	-17.354	-13.5709	-13.6746	-15.5997	-17.2467	-15.2031	-12.1046	-14.958	-16.2677	-19.5431	-13.7453	-14.4315	-10.1546	-15.1058	-14.3122	-13.5936	-8.15526	-13.6527	-17.6469	-13.9914	-13.5372	-15.8207	-16.652	-14.0728	-11.3675	-13.1442	-12.0395	-11.1659	-12.0132	-13.5032	-17.9466	-14.0085	-11.718	-13.2101	-13.0599	-9.76842	-10.9374	-14.7321	-17.6252	-18.5917	-13.3003	-13.0397	-13.0236	-14.5778
274.5	752.5	11.134	4.55699	-14.167	-13.4368	-17.147	-15.2914	-13.9299	-14.0552	-13.8119	-13.768	-13.484	-14.0586	-13.7962	-15.0096	-11.9427	-13.6188	-13.68	-15.996	-17.8765	-17.0543	-11.0702	-15.6291	-18.1119	-14.8831	-14.233	-16.4273	-15.3134	-13.3826	-11.9172	-16.1561	-11.1752	-13.7552	-10.8631	-13.8984	-17.804	-14.6358	-16.2682	-14.0017	-16.94	-10.5063	-12.2632	-14.4351	-15.3866	-15.0063	-12.929	-14.9127	-12.4637	-13.0467
275.5	752.5	11.134	4.55699	-16.3701	-15.7347	-14.7351	-19.8073	-14.4111	-15.3878	-12.4955	-14.3808	-15.8374	-13.0191	-12.1292	-12.7811	-12.039	-14.7567	-16.475	-18.6148	-18.1189	-19.2087	-14.9477	-16.7284	-16.6635	-14.3564	-14.5128	-17.6305	-16.2997	-14.6521	-14.9391	-21.1043	-12.0338	-16.0017	-13.4176	-13.8981	-16.4248	-17.4038	-18.0378	-14.0569	-20.0108	-14.9974	-14.5462	-13.1346	-15.8243	-13.8306	-13.3003	-16.682	-13.1162	-12.1207
276.5	752.5	11.1341	4.55699	-17.1596	-19.1198	-13.9397	-18.1433	-14.9438	-18.977	-13.752	-17.9595	-15.7322	-13.0308	-12.3032	-12.6392	-14.2144	-15.8831	-14.51	-20.958	-17.1419	-18.9055	-19.2186	-17.7049	-17.5162	-15.3609	-13.903	-18.779	-17.1172	-15.7403	-20.1488	-17.6459	-13.0621	-17.2201	-14.7413	-12.0111	-16.6516	-18.9444	-16.8892	-14.5057	-17.7462	-16.6723	-16.6948	-14.7118	-16.5258	-14.5739	-15.3629	-18.0819	-12.2058	-12.6456
277.5	752.5	11.1342	4.55699	-14.5842	-17.6128	-14.2864	-15.9866	-15.8702	-19.3212	-16.4301	-19.6359	-15.6278	-14.9459	-13.4624	-13.7334	-15.3349	-16.1019	-13.2953	-17.9964	-17.8418	-14.996	-19.0712	-19.3945	-19.133	-18.7638	-14.4427	-17.8228	-15.8263	-14.6239	-19.1868	-17.1555	-14.4355	-16.7837	-16.3778	-11.3818	-16.5741	-16.961	-15.5605	-13.3202	-13.9989	-15.7222	-18.5213	-17.7175	-16.4124	-15.2037	-16.5319	-17.5927	-11.1408	-13.9919
278.5	752.5	11.1343	4.55699	-10.8615	-17.0181	-14.9986	-13.8236	-15.5023	-18.2146	-18.6536	-18.2171	-15.737	-17.7956	-14.6074	-14.9545	-13.5392	-15.9227	-14.1116	-17.5735	-17.8509	-15.0196	-17.9127	-19.9035	-18.766	-20.9678	-14.4835	-19.0508	-14.6581	-13.8759	-16.2117	-18.2289	-15.0718	-14.9723	-18.189	-12.0806	-13.9199	-15.4235	-15.0886	-13.7179	-13.9686	-17.8393	-19.15	-15.8372	-15.8236	-15.4529	-15.6905	-15.3807	-13.1642	-14.3887
279.5	752.5	11.1344	4.55699	-9.39748	-17.8973	-15.6872	-12.8761	-13.9514	-18.7562	-18.4825	-16.8778	-14.5769	-18.92	-15.8436	-15.426	-13.6913	-15.5747	-17.0837	-19.1208	-15.9249	-16.2305	-17.2027	-18.3623	-20.0792	-21.1252	-15.2388	-19.7448	-14.8405	-15.8115	-16.0757	-17.3267	-13.9974	-14.7334	-17.3469	-16.3399	-13.6863	-15.1234	-14.1493	-14.1666	-17.8729	-17.5333	-16.3448	-13.9234	-16.134	-16.3826	-14.594	-15.7417	-18.0388	-16.6039
280.5	752.5	11.1345	4.55699	-9.45549	-17.7535	-15.0651	-13.2224	-13.2974	-19.32	-17.222	-16.0753	-12.6354	-15.2805	-16.791	-14.3117	-13.5063	-15.5307	-21.2426	-17.9719	-15.8118	-19.665	-16.7334	-17.9817	-22.0423	-19.4823	-16.0977	-22.6424	-17.2395	-19.7439	-17.1975	-16.3566	-15.0763	-15.5543	-14.3584	-19.7464	-16.2252	-13.2812	-14.5801	-13.0264	-15.2978	-13.8805	-12.1957	-15.0633	-17.3365	-15.76	-13.8104	-16.591	-21.4742	-20.1774
273.5	753.5	11.1339	4.5569	-14.3843	-13.7065	-18.2968	-14.2681	-13.2363	-16.1071	-18.5793	-17.0236	-13.7161	-14.9973	-18.4398	-17.592	-13.5934	-15.3901	-12.4874	-12.7715	-13.7061	-12.4061	-9.06303	-15.7579	-14.5972	-14.313	-14.3297	-15.4352	-14.4464	-12.6773	-12.5908	-11.3656	-10.5899	-9.49543	-10.3707	-13.6339	-19.2254	-15.6378	-12.2687	-12.8432	-13.2106	-9.05722	-9.00717	-17.533	-18.2733	-13.1881	-13.1211	-14.1332	-12.8992	-15.7013
274.5	753.5	11.134	4.5569	-13.6676	-13.0337	-17.8057	-15.5976	-13.5637	-16.769	-14.8369	-13.6454	-13.525	-14.9716	-17.4086	-15.5148	-11.4086	-12.8479	-16.4039	-14.6711	-15.41	-14.5382	-11.0171	-15.8014	-18.6758	-16.0713	-14.56	-18.8561	-13.607	-11.2526	-13.6603	-15.1892	-10.7395	-12.1312	-9.51485	-13.0871	-15.5583	-15.7278	-17.1124	-12.485	-16.613	-8.65669	-9.42349	-15.1447	-17.7122	-11.0976	-12.1956	-14.8871	-15.0057	-13.9696
275.5	753.5	11.134	4.5569	-14.6659	-15.4907	-15.9132	-17.0942	-14.3438	-17.0263	-13.2001	-12.9666	-13.2288	-13.6088	-14.0573	-13.7412	-12.3105	-13.3058	-15.8536	-18.4373	-14.8927	-17.2191	-14.2354	-14.4132	-18.4524	-16.0111	-15.0146	-19.3303	-15.5968	-11.9666	-17.8185	-17.9172	-12.308	-16.2489	-12.1467	-12.7375	-14.0994	-15.0159	-19.5096	-13.1664	-16.6443	-11.2092	-11.6359	-13.3751	-16.3686	-10.9992	-12.6474	-15.6205	-16.7143	-12.5336
276.5	753.5	11.1341	4.5569	-14.1842	-19.4003	-15.2498	-18.5229	-14.8265	-16.9561	-13.5096	-16.1649	-13.1591	-12.5305	-12.7378	-14.1904	-16.4184	-16.3474	-13.2468	-22.1621	-15.6684	-19.2637	-18.158	-15.4196	-17.3179	-16.5436	-15.8677	-16.6762	-16.6782	-14.1796	-23.3589	-16.7164	-14.0306	-19.0179	-17.1713	-13.5075	-15.0464	-16.1779	-17.2339	-14.14	-15.1167	-14.7073	-15.6214	-14.2263	-15.5677	-13.206	-15.2115	-16.6791	-12.4797	-13.5828
277.5	753.5	11.1342	4.5569	-14.4617	-18.0253	-15.5649	-17.8785	-16.31	-17.338	-14.6129	-18.7702	-13.2666	-13.8069	-14.5836	-15.0892	-20.1269	-16.125	-12.4379	-21.3965	-18.3979	-17.5638	-20.3562	-17.692	-18.9874	-19.2291	-17.1667	-16.6386	-15.5104	-15.2208	-19.3056	-16.6618	-15.9993	-16.9391	-19.6614	-14.299	-15.4079	-17.4449	-15.2873	-14.1781	-12.2903	-17.2865	-20.4393	-16.4157	-15.9339	-16.9416	-17.4975	-16.8135	-10.5166	-15.1555
278.5	753.5	11.1343	4.5569	-13.9205	-17.719	-15.1354	-15.317	-18.2781	-16.9614	-17.965	-19.4287	-13.8593	-16.5899	-16.615	-15.45	-16.0782	-15.0849	-13.8887	-19.409	-16.9376	-16.9212	-20.9214	-19.3492	-18.6405	-21.2142	-15.8428	-18.8722	-14.0684	-14.7038	-16.6451	-17.1587	-17.8121	-14.5922	-18.6987	-15.5683	-13.7241	-17.2439	-14.4892	-14.6003	-12.781	-18.1849	-18.4631	-15.331	-15.7577	-17.0656	-16.0967	-15.7486	-12.6308	-15.2373
279.5	753.5	11.1344	4.5569	-12.8826	-18.3545	-14.9359	-12.1438	-15.8936	-16.9242	-20.0814	-18.2967	-13.5765	-24.7415	-17.3206	-14.8724	-14.2193	-15.5986	-18.098	-17.1815	-14.7308	-16.724	-18.8209	-20.6875	-18.5085	-22.5576	-15.2589	-20.4651	-13.3643	-15.1046	-16.4241	-17.7216	-17.3791	-13.8472	-17.1531	-18.2781	-13.6028	-15.0322	-14.8454	-15.6005	-15.9431	-16.7897	-15.0007	-13.4871	-14.7183	-14.9345	-14.4386	-15.6975	-16.9581	-15.6201
280.5	753.5	11.1345	4.5569	-12.269	-18.6985	-15.6853	-12.3515	-12.9405	-20.0551	-18.295	-17.8634	-13.3347	-18.5424	-15.9356	-13.7558	-12.8243	-16.2567	-19.4954	-15.7235	-14.6918	-18.1068	-17.5806	-21.2832	-21.1651	-21.0866	-15.8534	-20.4955	-14.3631	-17.1237	-16.4389	-18.6897	-15.9777	-14.3703	-15.1473	-18.3032	-15.7807	-13.9979	-16.7999	-15.6617	-14.9076	-14.0752	-12.4535	-13.7085	-16.7934	-14.7346	-14.7676	-15.5182	-22.7588	-15.509
281.5	753.5	11.1346	4.5569	-12.1638	-18.2315	-16.7054	-13.5958	-12.897	-20.6632	-16.9916	-17.7144	-13.4146	-14.9992	-15.8455	-12.7949	-12.0377	-16.8028	-15.1764	-14.9887	-16.281	-20.1113	-18.0437	-20.3605	-19.0154	-19.6776	-16.9822	-19.15	-15.57	-19.3573	-15.2012	-18.4231	-16.7648	-14.6673	-16.3284	-17.6602	-17.7212	-13.9229	-17.5517	-16.5488	-14.9732	-12.25	-11.165	-14.1179	-18.0802	-15.9342	-14.8616	-14.1356	-19.4923	-14.9286
273.5	754.5	11.1339	4.55681	-15.1668	-12.955	-17.7138	-14.567	-14.9653	-16.6729	-21.026	-18.9726	-13.2218	-15.9832	-14.8207	-15.0505	-13.3648	-14.5154	-13.5199	-13.5753	-13.7719	-10.9999	-10.2621	-16.9102	-13.5767	-14.723	-13.3031	-12.9037	-13.6909	-10.6715	-14.9371	-12.1533	-10.7061	-9.69869	-10.9474	-13.3766	-16.1221	-16.1055	-13.3027	-14.0619	-12.7828	-10.0808	-9.17611	-16.9947	-15.7719	-11.6366	-13.341	-15.1644	-12.2787	-16.1101
274.5	754.5	11.134	4.55681	-13.7415	-14.562	-16.7284	-14.7039	-14.9459	-17.6375	-17.2872	-16.7805	-12.7382	-16.9768	-16.093	-14.689	-10.2051	-13.8	-16.0028	-14.9388	-14.5162	-11.7182	-10.7642	-17.0144	-16.2851	-16.1417	-13.963	-15.4388	-12.6626	-9.77649	-15.4332	-14.1043	-12.5763	-11.6847	-9.70987	-11.253	-12.7118	-14.1014	-15.7852	-13.1714	-13.5145	-8.02311	-9.15389	-19.2687	-15.7061	-9.56056	-13.6139	-14.9909	-15.627	-15.1599
275.5	754.5	11.134	4.55681	-13.7293	-16.9272	-16.0653	-15.8701	-14.3259	-14.8215	-15.3532	-15.4275	-11.8802	-14.6101	-15.5328	-15.3315	-10.2514	-14.6635	-15.155	-17.376	-13.6127	-13.498	-12.3983	-17.0154	-16.8907	-16.2823	-15.7728	-15.9163	-14.3737	-10.9858	-19.232	-14.1974	-14.2158	-16.3793	-11.0938	-10.1483	-11.4996	-13.5593	-17.4552	-12.8042	-13.8881	-9.46232	-10.8336	-17.7357	-15.3346	-10.1582	-15.1198	-15.4575	-16.7116	-14.0563
276.5	754.5	11.1341	4.55681	-12.5885	-18.661	-17.1203	-17.3686	-15.4331	-14.0569	-14.7558	-15.7252	-11.4566	-12.0364	-14.533	-16.9627	-13.0761	-18.9947	-14.6208	-17.0846	-14.4216	-16.2603	-15.3824	-17.4228	-17.5263	-16.3849	-18.0877	-14.5883	-17.5863	-14.6417	-22.0039	-13.8119	-15.7324	-24.3978	-15.7949	-11.7765	-13.2839	-14.9448	-16.941	-13.8375	-13.5503	-13.1727	-14.6087	-16.4941	-14.7107	-13.3467	-17.2837	-16.0996	-12.9819	-14.7336
277.5	754.5	11.1342	4.55681	-12.4375	-18.1235	-18.2462	-17.8757	-16.519	-15.6161	-14.8028	-16.9918	-12.1968	-12.7724	-15.7028	-17.1063	-17.2914	-17.8403	-16.1839	-14.6527	-17.1445	-18.6547	-17.8775	-18.5167	-18.9838	-17.1208	-20.2517	-14.6087	-17.4628	-17.6704	-19.2201	-15.152	-17.4617	-18.5728	-21.1058	-16.0882	-16.421	-15.7696	-15.5054	-16.0632	-12.9469	-17.3026	-19.8313	-16.4539	-16.0099	-19.5535	-18.7064	-16.69	-11.8626	-15.322
278.5	754.5	11.1343	4.55681	-13.6414	-16.8097	-17.442	-16.4245	-18.2032	-17.5587	-17.2314	-18.106	-13.0216	-15.1037	-16.7157	-15.2534	-17.7298	-15.329	-18.0046	-14.071	-16.7057	-19.8864	-20.748	-19.3022	-19.0304	-19.7471	-18.9702	-17.1003	-14.9882	-15.5603	-18.0995	-16.6214	-19.5204	-15.6645	-18.8203	-17.9923	-14.7779	-15.5568	-14.4505	-17.993	-13.7765	-19.8867	-17.5529	-15.374	-19.1024	-16.6462	-18.9536	-16.638	-12.897	-15.5121
279.5	754.5	11.1344	4.55681	-16.0848	-16.1678	-15.3575	-12.6236	-21.4383	-18.0253	-19.2715	-18.7607	-13.7516	-19.5952	-14.9976	-13.5162	-16.4127	-14.2623	-20.4786	-14.6217	-15.0179	-18.5732	-21.0297	-22.1894	-19.1691	-22.5524	-16.7435	-20.1892	-13.8825	-14.4362	-18.394	-18.3943	-19.455	-14.6787	-18.3073	-17.8908	-13.0523	-15.5079	-14.692	-16.2357	-15.0409	-16.5362	-15.435	-14.5995	-16.4785	-13.2463	-16.0468	-16.792	-15.1756	-15.5974
280.5	754.5	11.1345	4.55681	-16.5855	-16.9622	-14.6162	-12.0875	-15.6947	-18.6853	-18.7366	-19.5946	-14.7796	-21.3497	-13.54	-12.356	-14.775	-13.9685	-16.5407	-14.4733	-14.7352	-17.7541	-18.8571	-24.2088	-18.9524	-20.3975	-15.7991	-19.1473	-14.7911	-15.5741	-16.8993	-21.9005	-16.8906	-14.699	-18.1159	-17.9592	-15.2195	-13.9169	-15.8818	-15.7745	-12.7453	-14.2938	-14.4113	-14.0649	-16.0294	-13.8599	-16.2917	-15.3847	-17.355	-14.2422
281.5	754.5	11.1346	4.55681	-15.1849	-17.7518	-15.0852	-12.9531	-13.6822	-19.3907	-17.5638	-20.3862	-16.0038	-18.2405	-14.1263	-12.1564	-12.9215	-13.8209	-13.381	-15.1031	-15.4942	-20.116	-20.4606	-19.7411	-19.0235	-18.5513	-16.2137	-18.4089	-15.9384	-17.5592	-14.3599	-19.001	-16.7152	-15.5289	-20.9899	-17.2641	-19.1352	-12.5337	-16.7936	-17.3888	-12.6095	-12.6477	-12.9434	-13.9426	-18.5989	-15.3884	-18.4071	-12.9588	-16.5254	-13.9114
282.5	754.5	11.1347	4.55681	-13.4521	-15.838	-15.9614	-15.0474	-13.2522	-18.1877	-16.6694	-18.3528	-15.6097	-15.8555	-13.7652	-13.0415	-12.222	-13.8355	-14.6081	-15.1552	-16.2951	-19.2777	-21.7846	-18.2465	-20.3279	-17.9349	-17.2078	-19.7174	-15.7805	-20.3074	-12.2165	-15.231	-20.4013	-16.5195	-19.3198	-17.1375	-18.1501	-13.2066	-15.7108	-16.8428	-14.48	-12.1697	-12.2478	-16.3795	-17.4806	-15.0375	-17.7734	-12.4452	-16.258	-16.799
274.5	755.5	11.134	4.55672	-13.5679	-13.6273	-15.6804	-15.2997	-13.6153	-16.7973	-16.0553	-18.0092	-11.9972	-17.4303	-13.4307	-15.1378	-10.7456	-13.0087	-13.7768	-16.9775	-15.5964	-11.2466	-10.9332	-16.2057	-15.6696	-13.386	-13.0237	-12.1323	-11.8586	-9.64743	-15.8473	-14.2149	-14.7176	-11.6748	-10.0447	-10.965	-11.8395	-13.9197	-14.7177	-12.9506	-12.4751	-8.59432	-10.8716	-17.4435	-12.8606	-12.1911	-13.858	-13.0294	-16.3968	-16.1928
275.5	755.5	11.134	4.55672	-13.3313	-15.462	-15.6272	-16.0809	-13.6918	-15.5277	-15.144	-16.5784	-12.2773	-15.8708	-15.3174	-16.1722	-10.0184	-14.0541	-13.6952	-17.0301	-13.6565	-12.3392	-11.4895	-19.1482	-15.746	-14.1518	-15.2181	-13.622	-13.2405	-11.2551	-16.2399	-13.3389	-16.3768	-14.4744	-9.7175	-9.69739	-11.2358	-14.5422	-16.1007	-11.7705	-12.5019	-9.88763	-12.2949	-19.6173	-13.453	-12.5208	-16.0855	-14.927	-18.0374	-16.2369
276.5	755.5	11.1341	4.55672	-12.637	-16.1975	-16.8834	-16.9695	-15.6032	-15.0994	-14.0323	-15.7395	-12.1959	-13.4978	-16.4727	-17.3776	-11.5937	-16.8592	-15.9277	-15.1	-14.1177	-13.8488	-14.3657	-18.9346	-17.043	-15.3619	-17.4632	-15.1144	-16.3948	-15.104	-16.7298	-12.6609	-17.2594	-20.9789	-13.1512	-11.4272	-13.706	-15.3062	-16.0202	-13.3858	-13.2626	-14.1292	-15.7089	-19.1997	-14.7822	-14.9365	-16.1073	-16.7104	-16.9148	-15.5825
277.5	755.5	11.1342	4.55672	-12.2305	-17.176	-18.4922	-16.9303	-16.4768	-16.1821	-13.5158	-15.817	-13.0112	-14.1538	-17.1765	-17.2236	-15.1236	-17.537	-21.249	-12.992	-15.7559	-14.981	-18.7647	-18.5296	-19.3574	-15.3789	-18.6892	-15.3004	-18.0055	-18.5552	-15.7028	-14.0429	-19.8198	-18.4886	-22.0478	-16.3018	-18.8697	-15.9582	-15.2158	-17.5701	-15.8795	-18.6097	-17.274	-17.2145	-18.1023	-18.9463	-16.9658	-17.6492	-14.9833	-14.8865
278.5	755.5	11.1343	4.55672	-13.0817	-17.2352	-19.6733	-16.7615	-15.2882	-16.1629	-14.5216	-16.4558	-13.8694	-16.2269	-16.4942	-15.5847	-17.2299	-15.5902	-20.1487	-12.6116	-16.1426	-17.1448	-22.6177	-18.7447	-20.651	-17.6452	-18.2595	-15.7259	-15.4317	-18.3662	-15.3657	-15.9107	-19.6911	-16.192	-19.5091	-17.206	-16.2193	-16.8624	-14.9939	-18.971	-17.3024	-18.1022	-16.027	-15.4072	-19.634	-15.7809	-23.0998	-18.7283	-13.3055	-13.9888
279.5	755.5	11.1344	4.55672	-14.6855	-15.4403	-17.4639	-15.1961	-14.6655	-14.7587	-16.2868	-17.422	-14.3939	-18.7307	-14.0191	-13.8667	-17.0624	-14.5985	-19.6455	-13.8575	-15.6457	-17.8167	-20.4859	-20.2856	-21.0243	-20.8396	-17.4112	-17.3236	-14.2064	-15.713	-16.6919	-17.7789	-18.7769	-15.4253	-19.3347	-17.0572	-13.9367	-14.9795	-15.0526	-16.7367	-16.3753	-15.6421	-15.7228	-15.7639	-15.9949	-12.8546	-19.6104	-19.2695	-13.6093	-15.2703
280.5	755.5	11.1345	4.55672	-16.6394	-15.5622	-16.2084	-13.8178	-14.7542	-15.0054	-17.0648	-20.0238	-15.0369	-20.6231	-13.7247	-12.5498	-16.5966	-14.7084	-15.9934	-14.8299	-15.1961	-16.9172	-17.8812	-19.5726	-19.279	-19.761	-16.3795	-16.9169	-14.8132	-15.3469	-16.4517	-20.9812	-17.6464	-16.1982	-19.8569	-21.2631	-16.4795	-13.2466	-15.2869	-15.1763	-14.4917	-14.8836	-14.799	-15.2032	-16.1818	-14.8969	-17.2306	-17.8156	-15.1288	-15.258
281.5	755.5	11.1346	4.55672	-16.8119	-16.0885	-16.0524	-14.1156	-15.2457	-16.4721	-18.266	-22.5463	-15.1688	-20.6908	-13.6983	-13.0092	-17.083	-15.536	-13.8437	-15.6676	-14.0874	-18.4585	-20.3094	-17.6432	-18.9203	-19.4424	-15.5825	-18.5953	-16.5669	-16.7235	-15.1935	-19.9677	-16.5887	-15.3333	-19.7485	-19.8723	-22.7127	-12.9734	-15.3329	-16.3006	-14.4102	-13.692	-13.0467	-14.4699	-18.5979	-16.9412	-19.4285	-14.114	-15.994	-14.62
275.5	756.5	11.134	4.55663	-13.4254	-13.4393	-17.1368	-16.6224	-14.3586	-17.1839	-14.6443	-17.5499	-12.6672	-16.1892	-14.4419	-14.8273	-12.2814	-13.3279	-11.8125	-17.6419	-14.2336	-12.5799	-11.9434	-15.7526	-17.5371	-12.022	-13.1573	-12.496	-13.7824	-12.4683	-12.7142	-15.2493	-14.9995	-13.1792	-8.25446	-11.1572	-13.4955	-15.9582	-15.003	-11.1699	-13.1309	-11.9429	-13.6489	-15.6476	-13.8347	-14.6071	-13.3247	-14.7543	-18.0506	-17.664
276.5	756.5	11.1341	4.55663	-13.0357	-14.5189	-17.316	-17.0466	-15.9895	-18.1357	-12.917	-16.7533	-14.118	-16.1754	-15.2461	-16.7576	-14.0987	-15.5445	-14.506	-16.2231	-15.9309	-12.7017	-15.0503	-15.0266	-17.9709	-14.1945	-15.3717	-15.6004	-15.2918	-15.2231	-13.069	-13.1217	-17.3896	-14.9292	-11.4758	-12.4791	-14.5627	-15.7116	-13.3505	-14.4889	-14.5872	-15.0577	-14.6545	-17.7232	-16.354	-14.1024	-15.9358	-16.2216	-17.9755	-16.2478
277.5	756.5	11.1342	4.55663	-12.887	-16.3847	-16.4808	-17.467	-15.9536	-19.0102	-12.1251	-15.7845	-14.834	-17.4295	-17.164	-20.8399	-16.9215	-15.9342	-19.2477	-15.1875	-16.5662	-13.2766	-19.9281	-16.2757	-20.0034	-14.6558	-18.1271	-17.8109	-15.3239	-18.8507	-12.357	-13.8077	-22.5878	-15.2653	-19.8474	-14.3813	-17.1724	-15.2882	-14.7883	-19.623	-18.9408	-17.6236	-14.9073	-19.1646	-20.4866	-15.6634	-19.2423	-16.058	-15.5934	-14.6829
278.5	756.5	11.1343	4.55663	-14.3219	-17.8448	-17.1097	-18.1507	-13.8733	-16.8161	-12.9424	-16.4293	-15.6666	-19.1134	-16.3574	-21.5853	-16.8342	-15.6056	-16.8522	-13.9791	-15.2128	-15.6083	-19.5371	-18.5434	-22.121	-16.5812	-17.5376	-17.2941	-14.6999	-23.3596	-12.647	-14.9599	-18.0512	-14.8535	-19.145	-13.6558	-15.1967	-14.3418	-16.4367	-17.9421	-18.6449	-15.8655	-14.6747	-19.6887	-17.213	-15.6023	-22.0618	-18.9123	-12.7253	-13.3565
279.5	756.5	11.1344	4.55663	-16.0752	-16.3164	-17.155	-18.8864	-11.6269	-14.0346	-13.5199	-18.0818	-16.4413	-18.3104	-15.3918	-17.7387	-15.5572	-15.3147	-16.8623	-14.3627	-14.8066	-16.6936	-17.4777	-17.8807	-19.503	-19.2944	-17.7953	-16.5153	-13.7818	-16.8988	-14.8981	-16.1414	-16.9611	-15.0666	-20.0707	-15.5307	-12.9621	-13.9438	-15.5269	-18.7733	-17.3559	-13.944	-14.9054	-17.561	-15.6264	-14.8266	-18.9331	-23.9662	-12.1803	-14.2289
280.5	756.5	11.1345	4.55663	-17.3263	-16.236	-17.6833	-16.816	-11.8564	-13.8845	-13.6156	-21.6951	-15.0741	-17.9656	-15.241	-15.8596	-15.3058	-16.2487	-16.899	-15.6269	-14.6431	-17.015	-16.8657	-15.5348	-18.6256	-19.9961	-16.9045	-16.1778	-13.506	-15.6416	-17.1574	-18.9968	-16.4115	-15.6698	-21.2999	-22.6871	-15.2442	-14.5131	-14.7587	-17.792	-15.374	-14.1943	-14.6624	-14.0033	-18.9204	-16.4326	-15.863	-22.24	-14.0397	-15.2765
276.5	757.5	11.1341	4.55654	-13.3015	-15.6864	-18.2422	-17.3815	-16.0563	-20.5496	-14.0094	-17.6177	-16.778	-16.4556	-13.4443	-16.7056	-17.1948	-17.6723	-13.8183	-17.3771	-16.4282	-12.9401	-16.5444	-13.4802	-20.1464	-12.4927	-14.7816	-16.939	-14.4857	-15.9224	-11.8972	-14.4914	-16.2002	-13.3523	-11.8273	-14.2324	-14.147	-14.8446	-13.2527	-15.6437	-13.918	-12.6607	-12.1852	-16.9482	-14.9418	-13.5969	-16.3359	-14.7647	-17.045	-15.9485
277.5	757.5	11.1342	4.55654	-12.6585	-17.4708	-15.7525	-16.6655	-15.4272	-21.457	-13.5838	-17.2444	-17.3231	-17.6012	-15.1652	-23.4379	-18.2422	-16.9848	-16.4837	-17.6399	-17.0921	-13.5473	-18.8301	-14.828	-19.5241	-13.6675	-17.5737	-17.4755	-13.3208	-18.2484	-11.3895	-14.5333	-18.8835	-14.9318	-16.4613	-12.7525	-14.9593	-13.6577	-14.8599	-19.6479	-14.6181	-14.5517	-11.7446	-19.4818	-16.607	-14.947	-21.9994	-14.4798	-15.2562	-13.5502
278.5	757.5	11.1343	4.55654	-14.0534	-18.6794	-16.492	-16.9654	-14.0546	-17.4	-14.6806	-18.7511	-17.3073	-18.1025	-15.3689	-30.2195	-16.7355	-15.1384	-14.3918	-15.2416	-14.6978	-14.522	-18.1441	-17.8753	-21.9285	-17.0389	-17.4768	-17.5846	-13.6655	-21.2102	-12.4712	-13.6815	-16.7775	-15.251	-17.611	-11.4952	-14.4747	-14.0129	-17.1187	-18.2747	-15.7246	-14.6183	-13.3317	-20.7531	-13.8566	-16.6554	-18.7797	-16.0043	-12.9413	-12.5209
279.5	757.5	11.1344	4.55654	-16.0441	-18.0826	-17.9376	-17.2354	-12.5018	-15.0611	-12.8096	-20.947	-16.0291	-18.0068	-14.9676	-21.5386	-15.2977	-14.5933	-14.0397	-14.6714	-14.4048	-16.0896	-16.4757	-15.9395	-16.8249	-19.8473	-18.2137	-18.266	-13.759	-16.8316	-15.384	-14.6348	-17.0266	-15.4171	-19.2165	-14.1045	-12.4831	-15.1436	-15.467	-19.5976	-15.3969	-13.8401	-15.2776	-17.7084	-13.7281	-17.1862	-16.9523	-18.1483	-12.1109	-12.6829
278.5	758.5	11.1343	4.55645	-13.441	-18.2955	-17.7367	-15.2163	-15.8072	-16.6112	-14.453	-19.6051	-16.8845	-14.2544	-13.9837	-20.6768	-16.776	-14.3051	-13.7254	-17.992	-16.2352	-15.4942	-18.3913	-16.3425	-19.8434	-19.3442	-16.7112	-18.5131	-14.6466	-14.6325	-12.3556	-13.8072	-15.926	-13.9323	-16.7493	-12.6144	-14.7584	-16.2678	-16.9916	-18.4614	-13.6329	-16.5654	-13.6349	-14.6583	-12.8364	-16.8785	-16.9323	-13.5995	-14.8518	-12.5937
542.5	403.5	11.1582	4.58797	-14.6347	-13.8893	-13.6445	-15.3391	-15.8369	-18.2655	-16.5673	-15.0437	-15.6124	-19.147	-13.772	-15.9592	-14.4768	-16.2096	-15.495	-15.3095	-16.7152	-13.8196	-17.5131	-17.7849	-16.4042	-17.0717	-25.4371	-21.1799	-18.5391	-16.5887	-11.2659	-18.902	-19.0742	-14.884	-17.1407	-16.2227	-17.7675	-13.5673	-15.5197	-16.7872	-16.5744	-16.1161	-16.4165	-17.4212	-19.4149	-16.3796	-17.622	-19.2652	-16.5537	-18.0498
543.5	403.5	11.1583	4.58797	-14.3275	-11.9219	-14.0982	-16.6883	-15.2759	-17.7619	-14.9902	-14.1815	-14.149	-18.6194	-13.7659	-15.3997	-14.5334	-15.4973	-16.8589	-14.5959	-16.1978	-13.134	-17.605	-16.7794	-17.0656	-18.2759	-23.3388	-18.7328	-19.9839	-17.412	-13.1786	-18.6241	-15.4602	-15.339	-16.6198	-13.9736	-18.4769	-14.07	-15.6663	-15.8069	-16.8118	-13.9239	-14.594	-17.805	-18.8885	-18.3336	-20.5122	-15.9357	-19.5246	-17.4836
542.5	404.5	11.1582	4.58788	-16.6213	-15.3835	-15.6189	-13.717	-18.6441	-14.576	-17.8379	-14.6158	-16.8549	-20.2952	-11.5595	-13.2584	-12.681	-16.963	-17.5103	-19.9851	-17.1419	-17.8007	-19.3262	-20.6217	-18.1195	-20.3022	-19.9746	-20.7279	-15.6587	-17.2841	-14.8323	-17.408	-16.7617	-16.0052	-15.0321	-14.694	-14.7708	-16.6391	-15.0203	-16.1509	-16.0203	-17.729	-14.2381	-16.1637	-17.3593	-14.2614	-14.5975	-18.7377	-17.6523	-19.4659
543.5	404.5	11.1583	4.58788	-15.7129	-14.6215	-15.9287	-15.2843	-16.8657	-15.4471	-15.4735	-14.3319	-16.2851	-19.9966	-12.4032	-14.1751	-12.9618	-14.0377	-17.303	-18.2029	-15.7592	-15.8236	-17.3257	-18.7853	-19.2881	-18.3455	-20.6249	-20.3978	-18.0102	-17.6391	-14.2127	-18.9275	-16.424	-15.0566	-18.7917	-13.9459	-19.09	-20.0365	-14.1585	-16.0336	-17.5724	-15.2853	-13.6782	-18.2436	-17.5797	-16.8888	-15.0872	-15.6493	-17.2515	-18.2354
544.5	404.5	11.1584	4.58788	-15.5119	-14.6056	-15.3955	-15.3291	-15.1655	-15.6409	-13.5259	-13.5316	-14.4932	-17.3236	-14.0672	-14.5714	-14.4015	-12.6033	-19.5359	-17.6159	-15.4859	-14.4448	-15.9999	-19.8885	-19.0469	-16.3384	-18.9486	-17.9648	-16.6211	-16.4438	-14.2639	-18.1246	-16.8341	-13.8347	-15.101	-15.2134	-22.602	-17.0937	-13.8475	-14.1691	-17.7742	-14.9856	-12.5721	-16.2165	-16.2093	-18.5247	-16.1122	-17.3108	-19.5857	-18.7857
545.5	404.5	11.1585	4.58788	-14.2469	-15.8779	-15.8909	-13.5559	-14.7442	-14.6994	-13.0707	-14.5235	-12.9336	-17.3113	-13.3213	-14.2636	-16.3102	-13.2681	-19.5896	-17.9069	-16.5377	-15.7564	-15.2853	-19.6542	-18.6082	-15.165	-19.514	-16.1935	-16.0867	-14.6139	-13.6983	-15.2761	-18.5962	-14.3343	-13.5163	-17.5865	-16.6106	-13.9783	-14.7952	-16.8536	-15.507	-16.7507	-12.9281	-13.6765	-18.1592	-18.5318	-16.3293	-17.2126	-21.0257	-18.5477
542.5	405.5	11.1582	4.58779	-17.6016	-16.2254	-15.6336	-13.3591	-18.5566	-12.9264	-18.5818	-15.6162	-15.4365	-19.9966	-12.8395	-12.2757	-11.8307	-15.9816	-19.1166	-18.6647	-18.9306	-23.8187	-20.2934	-23.1302	-18.9737	-22.0101	-17.6906	-17.779	-15.5373	-18.3797	-16.5329	-17.957	-15.5101	-15.0859	-13.9242	-13.3833	-12.8326	-20.029	-14.9966	-14.2553	-14.2332	-16.9073	-13.9194	-15.7382	-17.6888	-13.4558	-13.6331	-20.0048	-19.5523	-19.8365
543.5	405.5	11.1583	4.58779	-17.0551	-17.0456	-15.0209	-14.1758	-16.5243	-14.0373	-16.9987	-14.9618	-15.8163	-18.3635	-13.5233	-13.2609	-11.6847	-13.3953	-16.3318	-17.5732	-16.1033	-23.009	-18.8763	-19.985	-24.2826	-20.8181	-18.4948	-19.0984	-15.8628	-17.6324	-13.9831	-20.2876	-16.9457	-14.5677	-16.8146	-12.7865	-16.6937	-18.3339	-14.8587	-16.9746	-14.0512	-16.1477	-15.0843	-18.2656	-18.4904	-16.4406	-14.0353	-17.7785	-17.1419	-20.4528
544.5	405.5	11.1584	4.58779	-14.8579	-15.4372	-15.7141	-14.3516	-14.6004	-14.7876	-13.9093	-14.6246	-15.3999	-15.7657	-14.5397	-15.1984	-12.8855	-11.951	-17.4207	-17.6414	-15.2927	-17.0953	-17.4091	-19.2141	-21.9572	-18.5591	-21.1182	-23.2457	-15.6316	-16.4962	-13.6179	-17.4243	-17.2358	-14.4685	-15.6433	-13.6021	-17.7247	-14.6469	-13.8523	-15.3012	-15.404	-12.8056	-15.033	-16.6536	-16.9155	-17.8037	-15.7943	-18.4783	-15.7214	-17.3989
545.5	405.5	11.1585	4.58779	-13.167	-15.4878	-15.857	-13.1733	-14.8435	-13.8064	-12.2794	-17.9306	-14.0685	-18.1998	-13.4811	-15.8107	-14.6319	-12.1751	-20.9503	-19.9511	-15.4127	-15.8985	-16.931	-20.2671	-18.1297	-16.5656	-21.2666	-19.9636	-15.8857	-15.787	-13.0178	-15.5656	-18.84	-14.3708	-15.1169	-15.0678	-17.9989	-14.3495	-14.3836	-16.5838	-15.1778	-12.2349	-13.8747	-12.7859	-20.0762	-19.2095	-17.4181	-18.0439	-18.7055	-16.4125
546.5	405.5	11.1586	4.58779	-12.4153	-15.9033	-16.1076	-13.5566	-15.733	-13.8626	-12.4394	-14.5818	-16.1301	-23.2255	-11.9411	-15.2646	-15.4753	-14.0618	-19.7224	-21.9697	-15.0442	-15.7214	-18.8928	-21.6102	-18.2808	-14.4349	-21.7109	-18.0506	-18.4615	-15.69	-12.5485	-15.0847	-18.1344	-13.9487	-18.0247	-14.9678	-17.4193	-12.8796	-13.6923	-17.276	-15.2691	-13.7012	-15.753	-13.1386	-20.3963	-20.598	-17.397	-20.5875	-17.7409	-16.16
542.5	406.5	11.1582	4.5877	-17.7866	-16.7978	-16.2252	-14.8348	-21.4218	-13.8939	-18.7534	-17.5671	-14.1398	-17.2195	-15.1453	-12.3031	-12.5891	-14.8063	-17.8169	-15.6948	-19.273	-22.4239	-21.9235	-23.8671	-18.534	-19.2115	-19.5525	-15.7716	-17.0418	-16.125	-18.0129	-17.9723	-17.0112	-13.8709	-16.7222	-13.4804	-13.0816	-20.4381	-15.5486	-15.4501	-13.719	-16.5556	-16.0899	-15.4447	-15.9302	-13.8604	-14.7955	-18.3533	-16.6278	-20.7993
543.5	406.5	11.1583	4.5877	-17.1447	-16.7694	-15.772	-15.7543	-17.6677	-13.8303	-20.0348	-17.0094	-14.1151	-15.2576	-15.4427	-13.0213	-12.4271	-14.1413	-15.2676	-15.1074	-16.1591	-26.2427	-20.0262	-21.383	-23.2188	-18.8034	-18.3913	-16.9207	-15.2964	-17.0493	-15.1819	-18.5795	-16.6815	-13.4523	-17.0865	-12.8624	-15.8852	-14.802	-15.1584	-18.2501	-12.7835	-17.0601	-18.2582	-15.6531	-21.0325	-17.1895	-16.8729	-17.4136	-14.8073	-19.9595
544.5	406.5	11.1584	4.5877	-14.5632	-14.7127	-16.6217	-15.3445	-13.9164	-13.0135	-15.924	-17.617	-15.223	-14.241	-14.2094	-14.7567	-13.3841	-14.1011	-14.7796	-16.3087	-15.2552	-20.4651	-21.8074	-21.7532	-21.8879	-19.474	-19.8185	-22.1109	-14.5123	-16.8738	-14.6086	-18.2264	-16.3965	-14.8753	-16.2061	-12.8745	-14.9292	-13.8482	-14.6708	-17.5693	-13.5366	-13.2159	-17.4508	-16.2237	-19.2396	-16.923	-19.7847	-16.5655	-13.255	-17.0121
545.5	406.5	11.1585	4.5877	-13.3445	-14.8078	-16.4519	-14.3746	-13.4464	-12.6806	-13.2606	-19.2767	-14.4478	-17.4956	-12.6282	-15.7816	-14.0366	-14.3499	-17.8908	-18.9148	-15.1325	-17.6858	-20.173	-23.2065	-18.645	-20.0676	-22.7538	-24.8593	-14.2887	-18.4972	-16.6014	-16.4879	-17.4462	-14.0132	-16.857	-13.6929	-15.4519	-15.1265	-14.0642	-16.7538	-14.6969	-11.5951	-16.2988	-14.6989	-19.4763	-16.87	-18.1194	-14.751	-15.778	-17.7639
546.5	406.5	11.1586	4.5877	-13.6492	-15.5651	-15.9279	-15.4614	-14.3602	-13.3088	-12.4578	-15.399	-15.3087	-23.6367	-12.3004	-15.506	-14.756	-15.0509	-21.1773	-18.4117	-15.1541	-19.6558	-21.4791	-21.4909	-19.5943	-16.3794	-20.5702	-20.1693	-15.4433	-19.209	-15.1023	-16.1651	-18.1723	-12.4166	-17.9176	-15.7111	-18.2741	-16.5397	-13.9266	-15.971	-16.6083	-12.0349	-16.474	-14.8383	-18.2949	-17.2531	-14.5529	-16.0267	-19.16	-17.9583
542.5	407.5	11.1582	4.58761	-15.4042	-17.6039	-15.7596	-14.5513	-21.2414	-15.4476	-19.5659	-19.8065	-14.7791	-16.7162	-16.8195	-14.0987	-14.3212	-14.7877	-18.6721	-13.0064	-18.1501	-22.4878	-29.8073	-22.8423	-19.6014	-23.4827	-22.273	-15.9399	-18.3811	-16.631	-17.8016	-15.5104	-19.2724	-14.8202	-20.512	-13.6807	-13.2104	-14.4918	-15.5932	-16.0244	-14.7975	-18.4662	-16.0244	-17.4289	-15.271	-17.0407	-15.4742	-15.5711	-16.0135	-18.8857
543.5	407.5	11.1583	4.58761	-14.4464	-16.343	-15.8244	-16.0655	-16.7686	-13.197	-20.3947	-21.193	-16.1352	-14.6342	-17.1117	-14.1654	-14.2916	-15.9953	-16.5718	-13.3622	-16.7005	-25.2217	-21.0264	-19.8986	-22.1891	-19.2864	-22.3064	-15.7583	-16.4051	-17.5211	-16.6138	-15.7091	-18.2012	-13.3365	-17.8456	-14.9084	-15.1122	-13.8777	-16.3994	-18.5787	-14.0557	-20.5943	-19.524	-15.1287	-15.7268	-19.146	-18.3544	-15.3679	-13.4128	-21.6878
544.5	407.5	11.1584	4.58761	-14.0226	-14.7425	-17.5526	-16.3174	-13.061	-12.2093	-17.2388	-23.3547	-16.0081	-14.6151	-14.1924	-15.2638	-14.2433	-18.1501	-14.4751	-15.1096	-17.7456	-21.2148	-20.0107	-20.2885	-23.5034	-18.9214	-22.1979	-21.2461	-15.0298	-17.3348	-16.9347	-17.4744	-16.8498	-12.3275	-20.205	-15.0096	-16.5075	-15.1762	-15.7676	-20.0766	-14.4357	-15.3995	-17.31	-16.1265	-20.6795	-18.3152	-18.8589	-16.3908	-13.0011	-19.8967
545.5	407.5	11.1585	4.58761	-14.2012	-14.6161	-17.1707	-15.6577	-12.3727	-13.0369	-14.4628	-21.1638	-14.2969	-16.9706	-11.9053	-15.2872	-13.0517	-18.9962	-14.1183	-17.4669	-17.225	-18.0329	-20.0787	-20.2451	-22.0704	-20.1199	-21.0471	-34.2895	-14.8644	-17.2611	-18.9893	-17.5724	-18.1875	-13.2194	-20.0437	-13.9852	-15.8081	-18.4264	-13.6885	-19.0611	-14.4574	-13.5712	-13.7595	-17.0318	-20.8492	-15.7619	-16.7378	-15.3714	-15.3326	-21.2048
546.5	407.5	11.1586	4.58761	-13.9779	-15.1708	-16.3447	-16.9878	-13.0734	-14.6539	-13.401	-16.8328	-14.2417	-19.4247	-12.1929	-15.4145	-13.8137	-17.2328	-15.695	-17.5182	-14.6973	-18.1053	-22.1622	-19.5005	-21.833	-17.83	-18.4509	-23.2531	-16.2609	-16.5884	-17.474	-17.4115	-17.1975	-12.0415	-20.1597	-17.3114	-15.7994	-19.1595	-13.4405	-19.3897	-16.1147	-14.8753	-13.9416	-17.2384	-18.8757	-14.2946	-13.6371	-15.6412	-19.3779	-21.9859
542.5	408.5	11.1582	4.58752	-14.4533	-17.0485	-14.1968	-15.0012	-20.3065	-15.0312	-22.9107	-21.5616	-13.3187	-16.66	-16.3155	-14.2199	-13.9939	-15.2788	-20.7733	-15.5639	-14.9805	-26.564	-22.4841	-19.9402	-19.9657	-20.963	-22.3691	-17.0385	-21.0484	-17.4725	-15.3537	-16.2556	-17.6215	-17.4001	-18.3894	-13.0318	-15.1064	-17.4094	-16.9447	-15.416	-14.1521	-20.4511	-16.1754	-16.0292	-15.5157	-17.1094	-15.1516	-15.589	-13.6935	-14.7715
543.5	408.5	11.1583	4.58752	-12.4695	-15.8314	-15.5549	-15.3929	-16.5054	-12.6961	-19.3967	-20.6947	-16.5167	-15.2106	-18.8396	-14.8592	-13.9584	-16.59	-18.2355	-15.1537	-16.6651	-24.299	-20.2126	-20.0344	-20.1115	-22.066	-23.0493	-15.9616	-21.0532	-19.1771	-16.3682	-16.1999	-19.7632	-16.8059	-16.1766	-16.0748	-16.818	-16.1527	-18.856	-18.6615	-15.2781	-22.9507	-18.3332	-16.0584	-13.9433	-19.8	-17.7213	-15.876	-12.325	-17.7989
544.5	408.5	11.1584	4.58752	-12.7728	-14.8328	-18.3795	-15.4986	-12.7721	-11.9668	-16.6025	-17.6702	-17.4696	-14.6577	-15.6663	-16.6731	-13.1495	-18.1212	-16.6232	-14.5915	-17.0113	-19.9862	-16.7566	-20.1083	-20.4001	-21.8941	-27.3111	-20.0581	-17.7896	-17.5217	-17.8933	-16.3449	-18.3505	-12.1201	-20.0399	-19.7572	-19.8217	-17.8818	-20.8563	-19.9725	-17.0418	-18.5227	-20.2861	-17.8244	-16.9774	-21.3188	-17.3364	-17.9514	-13.2437	-19.2267
545.5	408.5	11.1585	4.58752	-14.1686	-13.8248	-17.0069	-14.7867	-12.1312	-14.6944	-14.4382	-17.3663	-15.5682	-15.3703	-12.0032	-15.568	-11.804	-19.9999	-14.4944	-16.1709	-16.3734	-17.0892	-17.1844	-22.166	-20.941	-21.0544	-21.0548	-32.2153	-16.3278	-14.2087	-18.9925	-15.9197	-19.2865	-11.4596	-25.2953	-19.4892	-17.8929	-18.7624	-15.8858	-19.8594	-15.6489	-16.2743	-16.2632	-17.6161	-19.8799	-17.1793	-17.056	-18.3509	-16.4245	-21.5512
545.5	409.5	11.1585	4.58743	-12.2792	-12.9191	-18.8293	-13.5691	-14.0333	-15.6712	-14.399	-15.3628	-15.1899	-15.2163	-13.1199	-13.9863	-11.7716	-15.338	-18.0087	-13.5483	-15.0575	-15.2297	-15.4877	-21.5379	-18.4067	-21.4354	-22.1858	-25.1833	-17.3677	-14.4118	-20.4931	-15.8816	-17.8446	-13.5163	-22.3737	-21.0237	-19.3013	-16.3329	-17.823	-17.3503	-17.68	-18.5534	-20.0724	-16.82	-20.0662	-19.6373	-20.2214	-21.4502	-15.8266	-19.1132
562.5	427.5	11.16	4.5858	-16.0627	-15.6582	-15.444	-17.1875	-15.9044	-21.8394	-11.1682	-19.7116	-13.8699	-17.558	-14.5664	-17.0336	-23.0297	-20.6539	-18.5654	-14.0625	-13.996	-12.5021	-18.06	-17.0625	-12.907	-15.897	-15.4436	-15.4704	-14.6678	-13.6775	-13.1632	-14.0682	-14.5996	-16.5499	-10.5119	-13.2678	-12.0908	-12.7323	-7.80502	-11.6859	-14.7132	-12.398	-12.7596	-15.0666	-13.7825	-14.0926	-13.8871	-15.6859	-13.7938	-15.6571
563.5	427.5	11.1601	4.5858	-13.9487	-14.3904	-17.0435	-18.8164	-14.4007	-19.4929	-13.3763	-26.4664	-15.4816	-17.1854	-14.1767	-16.5123	-20.1803	-18.191	-18.9693	-15.2876	-15.2942	-13.2255	-17.762	-20.704	-15.2021	-15.3054	-16.4334	-16.5082	-13.9082	-13.1028	-11.3983	-14.4253	-13.765	-15.7871	-9.65742	-12.3195	-10.9596	-13.3462	-9.36342	-9.40961	-14.6817	-12.0073	-11.0199	-12.8299	-11.9671	-11.6699	-11.7429	-15.2283	-13.5627	-14.2801
561.5	428.5	11.1599	4.58571	-14.8245	-18.6986	-15.4249	-17.4676	-14.7774	-17.7583	-14.0875	-15.2842	-15.8039	-15.8828	-14.8101	-18.0359	-21.2945	-17.8807	-19.7388	-13.4929	-13.6619	-11.5711	-20.1573	-16.1634	-13.6404	-18.4133	-15.3746	-16.0436	-18.0958	-16.4661	-14.7225	-14.8874	-13.8455	-16.6519	-12.1963	-11.741	-14.5025	-14.9895	-9.06015	-12.6456	-14.5622	-11.4652	-12.4721	-14.628	-14.6668	-14.8333	-16.9161	-15.1565	-16.8773	-15.7612
562.5	428.5	11.16	4.58571	-15.1637	-15.9527	-14.671	-16.7963	-16.1866	-17.6812	-11.2059	-22.0375	-13.9919	-17.2297	-15.4591	-18.4567	-22.6172	-16.5469	-18.0707	-15.8805	-13.6066	-12.7597	-20.4079	-18.7648	-12.8734	-14.5643	-15.3072	-17.6603	-14.1307	-15.0351	-12.4919	-13.3799	-12.5316	-16.8651	-10.3705	-11.5091	-12.2323	-13.6218	-8.5304	-11.5297	-13.925	-12.1753	-12.4038	-12.4834	-12.7707	-13.5716	-14.7946	-14.4157	-14.5298	-13.6148
563.5	428.5	11.1601	4.58571	-15.577	-15.53	-15.535	-15.8243	-15.0266	-17.3125	-14.466	-25.1765	-13.9952	-18.2248	-14.8583	-19.426	-18.5604	-16.999	-18.1408	-18.3815	-13.9911	-13.6988	-19.6916	-24.9328	-14.6406	-14.3893	-16.3834	-17.2564	-12.1955	-13.8759	-13.4687	-14.877	-12.7265	-16.298	-9.90729	-10.2615	-11.7457	-15.1522	-8.06295	-9.68899	-13.0407	-13.0865	-13.2042	-10.805	-13.1386	-13.4266	-12.5393	-14.9522	-15.6053	-14.8369
564.5	428.5	11.1602	4.58571	-15.7157	-15.9279	-14.6254	-16.3196	-17.025	-18.8878	-24.0199	-20.9422	-15.6509	-14.8943	-13.5213	-18.4188	-15.3506	-18.8594	-18.6486	-19.4606	-13.5774	-15.7198	-20.3415	-28.8824	-19.3329	-18.2088	-18.8324	-17.8507	-11.6547	-11.0511	-15.9124	-15.0854	-14.0369	-19.8402	-11.0695	-9.33295	-12.1776	-16.9446	-10.6734	-9.39342	-15.1379	-12.9057	-13.2831	-10.7821	-12.9885	-17.7755	-15.1178	-14.2367	-16.4446	-16.6629
560.5	429.5	11.1598	4.58562	-14.2377	-17.2724	-15.685	-17.2336	-15.6391	-16.5461	-17.2445	-17.1913	-15.5268	-17.6098	-18.4178	-16.8036	-19.48	-16.5044	-16.7431	-13.2656	-13.9135	-13.8294	-20.2905	-18.0801	-17.1837	-20.0421	-17.7225	-18.5381	-19.467	-15.8952	-16.8798	-16.3405	-16.2319	-18.5079	-12.9883	-15.1799	-13.2608	-16.3837	-12.4222	-12.0215	-12.349	-11.8238	-13.629	-14.4277	-13.7797	-15.7106	-15.8734	-14.6944	-19.8814	-18.8759
561.5	429.5	11.1599	4.58562	-14.5191	-14.473	-15.6435	-17.4734	-17.4431	-16.1356	-15.0049	-19.6206	-16.5982	-16.9163	-17.0419	-17.5624	-22.8972	-15.3045	-17.0661	-13.5279	-14.1331	-12.7798	-20.1306	-17.8906	-14.5405	-16.463	-16.7677	-17.1158	-14.9638	-15.6135	-12.8212	-15.9311	-14.7934	-17.6292	-11.2375	-11.2735	-12.3618	-13.8708	-12.0712	-12.1817	-12.8217	-12.5108	-11.7088	-12.042	-13.9309	-14.4478	-17.4217	-13.4683	-17.4312	-15.0895
562.5	429.5	11.16	4.58562	-14.8259	-14.0307	-14.9988	-15.9636	-18.3772	-15.2392	-13.9314	-25.1601	-15.2284	-18.4564	-16.1649	-17.7265	-21.6513	-13.7825	-18.107	-16.2587	-13.8854	-13.8294	-20.5803	-21.2863	-14.5943	-14.2327	-15.1243	-18.1317	-12.9317	-16.2785	-12.8544	-15.0695	-12.8675	-16.8773	-10.789	-10.8408	-11.819	-13.0427	-10.6107	-11.7723	-14.896	-13.6573	-12.5499	-10.7786	-12.9054	-16.2053	-17.4178	-12.7856	-19.2263	-14.7901
563.5	429.5	11.1601	4.58562	-17.6608	-15.3778	-15.9651	-14.292	-16.4023	-16.2297	-16.8088	-23.4074	-13.727	-15.263	-15.1309	-17.7311	-16.1231	-15.7376	-19.0799	-20.6349	-14.3047	-15.2555	-20.8678	-24.2435	-16.3647	-15.3376	-16.3455	-17.4818	-12.1439	-15.149	-15.2721	-16.7384	-13.5853	-16.2756	-11.2067	-10.495	-13.1935	-14.6086	-10.3905	-10.9899	-15.3625	-14.0563	-16.4845	-9.94262	-14.1851	-17.3366	-16.487	-14.0862	-20.2928	-17.6593
564.5	429.5	11.1602	4.58562	-17.5175	-15.6338	-14.5304	-15.531	-16.2633	-18.1243	-20.8019	-19.7555	-15.1831	-14.1632	-13.3232	-18.9176	-12.9448	-20.8869	-19.8084	-21.457	-14.1858	-17.0917	-20.8836	-22.4499	-20.9253	-17.6991	-19.4311	-16.4145	-12.0411	-13.4789	-17.235	-16.7486	-16.7201	-15.9967	-12.7739	-11.2108	-13.4096	-17.1745	-12.0271	-11.3119	-16.1047	-12.2443	-16.2433	-9.75664	-13.1616	-16.9994	-16.005	-15.9676	-18.9324	-16.1081
565.5	429.5	11.1603	4.58562	-14.476	-15.7774	-13.2642	-17.1309	-16.3215	-17.1364	-19.7453	-17.2236	-16.3435	-15.601	-12.4281	-17.5059	-12.6196	-20.3647	-18.7478	-19.381	-15.942	-19.901	-20.9989	-20.254	-21.4518	-16.3198	-18.7859	-16.0608	-11.3645	-14.7159	-19.9059	-15.0534	-13.0272	-14.0269	-13.0694	-11.9254	-11.9578	-19.6249	-13.8649	-13.0866	-16.1991	-12.036	-13.0542	-11.8506	-11.1979	-14.3204	-13.3066	-13.4378	-18.5305	-16.2735
559.5	430.5	11.1597	4.58554	-15.727	-17.1492	-16.2398	-17.0054	-16.7317	-17.6465	-19.841	-15.4315	-20.37	-14.9016	-19.8858	-16.038	-17.2205	-21.0763	-17.9467	-17.374	-15.0807	-18.4704	-20.6752	-22.2051	-19.4395	-17.8723	-17.6325	-17.9812	-16.5775	-15.7758	-16.7892	-15.6444	-16.7374	-17.0476	-12.4355	-18.3465	-15.041	-15.5561	-16.3396	-17.5933	-13.7444	-13.5214	-14.1404	-15.8049	-14.5389	-14.5792	-13.2137	-14.0617	-19.9874	-19.1773
560.5	430.5	11.1598	4.58554	-15.149	-15.584	-17.2551	-16.8555	-18.3119	-18.1786	-17.5788	-19.7531	-15.933	-16.3307	-18.0163	-14.4357	-23.8478	-16.6198	-15.2745	-13.6315	-16.1077	-15.4193	-21.1661	-22.0596	-17.3364	-18.2229	-17.7054	-15.7454	-18.231	-17.5454	-14.3797	-16.3432	-14.7864	-14.9864	-11.6216	-17.9805	-12.065	-12.7502	-17.9682	-14.9703	-11.2186	-12.472	-14.1846	-13.6154	-13.6271	-15.2951	-14.5941	-13.9706	-19.831	-18.5793
561.5	430.5	11.1599	4.58553	-14.9872	-13.6254	-16.3434	-16.4852	-21.4657	-16.4397	-18.6455	-25.2132	-16.1677	-16.2196	-17.4607	-14.9448	-21.6959	-14.5887	-15.8449	-12.739	-16.8357	-14.5374	-20.2768	-20.572	-15.3426	-17.6956	-17.0934	-15.1901	-16.3607	-15.6395	-12.8643	-18.0828	-14.9833	-15.6986	-11.5289	-12.1739	-11.4567	-10.1067	-14.8924	-12.9351	-12.735	-13.074	-11.8979	-11.2808	-13.9664	-16.3053	-18.792	-12.9649	-18.3501	-17.3103
562.5	430.5	11.16	4.58553	-14.2648	-13.0884	-15.3769	-16.2086	-18.4961	-16.7484	-20.1088	-25.8805	-15.7513	-15.7577	-15.9966	-15.3258	-18.6392	-13.3472	-18.6071	-15.6072	-16.1436	-16.1054	-21.0471	-20.4592	-16.5804	-17.2239	-15.8409	-17.4988	-15.6531	-16.544	-13.9826	-19.1511	-14.5603	-17.3724	-12.4836	-11.6927	-13.0852	-10.8507	-12.7937	-11.7192	-16.597	-14.6867	-13.1771	-11.5254	-13.13	-20.3175	-20.3197	-12.0548	-21.6622	-19.663
563.5	430.5	11.1601	4.58553	-16.0782	-13.9805	-16.6827	-14.9317	-17.1497	-17.6994	-18.5544	-18.5702	-14.3016	-13.479	-15.7818	-14.8606	-16.2692	-15.1683	-18.6822	-20.2334	-16.0219	-17.2923	-21.4074	-20.1069	-21.1046	-17.2553	-17.991	-17.2936	-14.8217	-16.346	-15.4644	-20.5141	-15.8029	-17.6544	-12.5557	-12.7658	-15.4941	-14.0325	-13.8318	-12.1811	-19.6973	-14.4657	-17.0748	-11.1633	-13.2083	-16.6113	-16.0035	-14.4386	-19.2621	-17.4334
564.5	430.5	11.1602	4.58553	-17.4886	-15.2275	-16.4992	-15.8804	-15.4411	-17.7324	-19.0224	-16.2644	-14.4652	-12.8864	-14.1	-16.7214	-13.2912	-19.7007	-19.5861	-20.411	-16.2246	-17.7528	-20.945	-21.8942	-22.8127	-17.1985	-23.064	-16.6328	-14.0316	-16.8559	-16.0982	-18.5415	-16.0754	-16.732	-13.1229	-13.8979	-13.5853	-17.5747	-13.7876	-13.4496	-18.8798	-12.7602	-14.0027	-10.7514	-12.4707	-14.4135	-12.7347	-19.4602	-17.9961	-13.4665
560.5	431.5	11.1598	4.58545	-14.8687	-15.9382	-19.0005	-16.3945	-19.1405	-17.5015	-19.8208	-18.0313	-16.2481	-15.3907	-14.9924	-13.7385	-19.1311	-17.788	-15.6297	-14.0114	-16.8273	-16.2862	-20.652	-19.872	-18.7966	-16.7336	-17.441	-13.4389	-19.5551	-17.4087	-15.3238	-17.1302	-14.5756	-12.912	-12.2588	-18.7673	-13.0856	-10.1567	-18.0237	-15.9333	-13.5543	-12.1285	-14.1172	-15.7976	-14.2614	-14.9686	-14.9256	-13.4239	-16.8101	-18.1833
561.5	431.5	11.1599	4.58544	-14.0464	-15.5435	-17.3496	-15.8985	-19.584	-17.116	-20.9385	-24.4474	-14.7632	-16.6664	-16.4931	-15.2596	-16.5871	-16.5686	-15.9905	-13.7904	-19.7724	-15.3725	-21.4273	-21.8484	-17.0243	-18.1313	-18.0368	-14.4365	-19.4375	-16.5695	-15.4191	-17.825	-13.6255	-16.2236	-13.4011	-13.757	-13.0335	-10.3121	-14.4302	-13.0738	-14.9125	-12.8998	-12.2542	-13.6226	-14.9817	-14.9001	-16.989	-12.4619	-16.6589	-17.0158
562.5	431.5	11.16	4.58544	-12.7429	-15.3285	-16.1339	-17.3736	-17.7254	-18.5167	-21.9949	-25.5603	-15.101	-14.857	-16.7199	-14.7697	-14.9064	-15.3573	-18.2342	-15.6893	-20.5165	-18.3026	-26.446	-20.3469	-17.4805	-20.0851	-17.6691	-16.6807	-19.4898	-16.0687	-15.313	-19.1039	-12.8503	-19.9767	-13.7033	-13.5872	-15.1983	-12.9022	-13.3752	-12.4343	-16.0072	-14.1886	-13.598	-14.8614	-12.7938	-16.3008	-17.5603	-12.5632	-19.6559	-19.4999
563.5	431.5	11.1601	4.58544	-13.0934	-15.4187	-17.3544	-17.8039	-16.7937	-17.8463	-18.2716	-18.1436	-14.0514	-12.7349	-16.3373	-14.206	-16.6917	-15.4469	-17.4734	-17.6738	-18.098	-19.4679	-22.8477	-20.087	-21.9593	-17.3024	-18.7488	-17.4281	-17.6017	-17.8802	-15.2151	-20.5346	-14.5298	-16.9213	-13.3472	-13.8166	-13.811	-15.7563	-13.5448	-12.2773	-15.7823	-14.8191	-14.1706	-13.4079	-11.6816	-14.3563	-15.3187	-15.6125	-18.3561	-15.9679
561.5	432.5	11.1599	4.58536	-13.3673	-16.4055	-17.6738	-15.4425	-17.3512	-17.1602	-20.0814	-27.5872	-14.815	-18.2172	-13.0343	-16.5806	-13.9322	-19.2752	-16.7713	-17.0467	-21.3834	-17.4819	-20.4415	-23.9376	-19.2954	-20.2527	-19.8792	-16.243	-17.1924	-16.9462	-15.9458	-15.347	-14.0268	-18.9345	-14.2624	-15.8206	-16.7446	-12.5761	-13.534	-13.4655	-15.5323	-13.2982	-13.4404	-15.8882	-15.4616	-13.2464	-14.7609	-11.5058	-17.1926	-17.8635
562.5	432.5	11.16	4.58535	-10.989	-17.3322	-16.2929	-16.1377	-17.4347	-20.0105	-20.7309	-22.4349	-15.0693	-15.0752	-13.6758	-17.0363	-12.8399	-19.2205	-17.986	-16.3686	-19.137	-21.3174	-24.5535	-21.7341	-17.24	-21.8942	-18.1693	-16.3142	-17.4218	-18.084	-15.4078	-17.2814	-12.4742	-18.644	-13.2615	-15.4517	-14.1369	-13.6367	-12.4688	-11.996	-14.7828	-11.8087	-12.8676	-14.8119	-12.9595	-14.3278	-14.2634	-12.4605	-22.0041	-18.0575
639.5	485.5	11.1668	4.58053	-15.4896	-12.7804	-16.7651	-15.8405	-13.1679	-13.403	-14.7657	-18.0199	-16.1874	-16.6663	-14.0966	-15.5701	-18.6727	-17.1704	-15.7125	-12.4871	-14.6274	-16.8269	-16.4423	-15.1333	-15.0851	-17.5937	-15.4911	-14.1389	-17.2923	-17.2516	-14.3874	-20.122	-15.8355	-13.3314	-14.011	-16.3572	-11.9336	-13.6991	-18.9881	-18.979	-14.136	-15.4172	-17.0835	-15.0228	-16.3368	-18.4735	-13.7723	-13.9806	-11.4112	-12.9233
640.5	485.5	11.1669	4.58053	-14.471	-12.6879	-16.9861	-14.9655	-11.7938	-12.8428	-17.5206	-19.0307	-16.4176	-15.8054	-13.8325	-13.0145	-15.4557	-20.4077	-13.5978	-12.5409	-17.06	-19.828	-16.5439	-15.4028	-15.9601	-20.0673	-15.0617	-14.3661	-17.5043	-19.1878	-15.5758	-18.8783	-16.6181	-12.782	-13.9375	-16.7296	-13.9057	-12.3171	-16.4864	-16.88	-15.4471	-16.5073	-17.2399	-17.1316	-16.429	-16.4544	-14.7596	-11.7607	-12.8699	-12.7707
641.5	485.5	11.167	4.58053	-14.0346	-14.8327	-16.6869	-13.1248	-10.9533	-12.5667	-19.1561	-18.188	-14.4809	-17.9022	-13.0455	-11.3936	-13.2726	-19.9491	-14.9502	-13.9148	-20.3846	-16.7223	-14.1621	-17.8768	-16.46	-17.8205	-16.3209	-14.8584	-16.4512	-14.8156	-17.1155	-16.2283	-17.34	-13.9501	-16.2739	-15.2571	-16.1266	-11.2319	-15.9509	-16.1894	-14.4424	-16.4688	-16.9043	-17.9468	-13.7642	-13.6848	-15.0841	-10.8205	-16.1437	-17.2537
642.5	485.5	11.1671	4.58053	-15.6716	-17.9073	-16.0871	-13.1586	-11.9968	-12.9881	-17.1502	-15.9792	-12.5998	-23.2187	-12.4223	-12.1977	-11.9396	-18.545	-16.4519	-15.2164	-19.9896	-16.2986	-14.8077	-16.7257	-16.7291	-17.1004	-19.3525	-14.7119	-15.9443	-11.7759	-18.3783	-14.3443	-17.6098	-14.0516	-15.9262	-13.2269	-19.284	-11.3508	-16.5001	-18.2516	-13.307	-20.2111	-17.7408	-21.734	-13.6646	-14.5675	-14.7201	-10.9465	-17.6894	-16.6277
643.5	485.5	11.1672	4.58052	-16.8801	-19.3542	-14.9144	-13.9961	-13.878	-13.2859	-16.331	-14.0427	-12.9899	-22.2281	-12.7398	-13.2741	-11.7297	-18.1951	-15.2343	-16.438	-20.2805	-18.3314	-17.7323	-16.2523	-17.1642	-16.195	-19.3746	-13.0143	-18.5584	-11.526	-19.537	-15.0547	-19.2141	-14.2278	-13.9661	-13.3272	-17.7739	-13.9186	-16.1504	-15.4319	-12.0264	-17.9984	-19.0381	-22.201	-14.1271	-16.8059	-17.0445	-11.8872	-16.1253	-12.6857
639.5	486.5	11.1668	4.58044	-15.3577	-14.0732	-17.5798	-14.4134	-14.3955	-14.2259	-16.2051	-19.1093	-16.0978	-18.3028	-14.1844	-15.7861	-15.6938	-16.9534	-18.8203	-11.3767	-15.0961	-15.0446	-19.9661	-15.3154	-17.2927	-15.5331	-14.4675	-14.505	-19.1545	-18.4141	-16.6114	-23.5191	-15.6878	-14.9568	-11.788	-16.671	-12.8856	-14.1931	-16.1835	-15.9878	-12.911	-15.0595	-16.9441	-15.4084	-16.424	-17.3971	-15.838	-14.9934	-11.9341	-14.1548
640.5	486.5	11.1669	4.58044	-15.0631	-14.5731	-17.0976	-15.0956	-13.1711	-14.1628	-19.6912	-19.4983	-16.418	-16.3044	-15.6558	-13.4325	-16.4806	-18.9412	-15.1856	-11.8655	-18.5207	-18.7374	-16.6102	-16.0855	-17.115	-16.5218	-14.8622	-16.3185	-17.1013	-17.3338	-14.155	-25.3626	-15.9155	-14.7728	-12.4272	-16.2871	-12.9745	-15.1607	-15.4839	-16.0872	-13.5461	-15.6016	-16.5104	-14.5589	-14.3473	-16.1971	-15.8953	-11.3064	-12.0721	-13.4594
641.5	486.5	11.167	4.58044	-15.5795	-16.2003	-16.3334	-14.1479	-13.0322	-13.9439	-17.7824	-18.3736	-13.8786	-17.7893	-15.2846	-12.5627	-15.3208	-18.2053	-15.593	-13.5346	-20.6417	-17.398	-13.8792	-18.0148	-16.277	-16.4941	-17.242	-16.0505	-13.9968	-14.6568	-14.5408	-18.3529	-16.6109	-16.1496	-13.9324	-16.051	-15.6775	-13.3007	-16.279	-16.013	-15.565	-15.5043	-15.6009	-15.1092	-11.6861	-15.0831	-15.5366	-10.8243	-14.073	-15.132
642.5	486.5	11.1671	4.58044	-17.8298	-18.3442	-15.583	-14.4937	-14.8478	-13.5077	-16.6194	-16.5532	-12.5744	-19.177	-14.8827	-13.6602	-13.3844	-18.4956	-16.6388	-15.1016	-19.8946	-18.2101	-14.0058	-18.6003	-17.2804	-16.4043	-20.3556	-15.3651	-13.8744	-14.5578	-16.6427	-14.9584	-16.8007	-16.4423	-14.4603	-15.0822	-17.8714	-14.739	-20.1737	-15.5917	-13.6959	-17.9682	-16.3622	-18.4385	-12.1565	-15.9329	-15.3491	-10.6338	-16.4888	-14.9405
643.5	486.5	11.1672	4.58044	-17.7823	-17.5103	-15.0089	-15.492	-15.0227	-13.6526	-17.6985	-15.456	-13.0509	-17.9467	-14.0168	-15.0978	-11.9144	-19.9062	-15.9705	-16.4918	-18.5996	-19.6559	-15.8759	-19.2264	-18.9535	-15.6788	-22.5562	-14.3421	-17.0194	-13.7501	-19.3206	-14.3837	-18.1266	-15.2924	-15.0972	-14.427	-16.7444	-16.4817	-15.4275	-14.8017	-11.334	-17.0443	-18.4592	-21.565	-12.7661	-17.2804	-16.885	-11.9708	-13.4852	-12.4471
639.5	487.5	11.1668	4.58035	-14.0903	-15.1128	-17.6525	-15.4252	-16.8598	-13.6442	-16.3293	-17.3866	-14.4765	-15.6234	-15.8082	-14.7869	-15.3511	-16.3756	-19.6453	-13.0879	-15.672	-15.1307	-21.8261	-15.6295	-15.4041	-15.0076	-13.8766	-16.7551	-19.9484	-16.6414	-16.9574	-19.7842	-16.3673	-17.4369	-12.3513	-15.9964	-13.5674	-15.777	-15.211	-14.3588	-13.0682	-17.9708	-16.1995	-14.6686	-15.4712	-17.0244	-18.9056	-16.1713	-13.7417	-15.1586
640.5	487.5	11.1669	4.58035	-14.557	-14.1584	-16.5564	-16.4742	-15.4375	-14.5461	-19.1209	-18.9099	-13.4039	-15.5637	-14.4328	-13.5068	-18.472	-16.4574	-15.2583	-13.5515	-18.8008	-17.7472	-16.4026	-15.4265	-15.0569	-13.1866	-13.4019	-17.0967	-17.0041	-17.1309	-15.7736	-21.836	-16.5222	-14.568	-13.5527	-19.9536	-13.9418	-16.072	-13.5843	-17.6453	-13.6864	-16.8745	-14.2511	-14.9643	-15.4385	-15.1077	-16.0607	-12.1123	-12.355	-16.1444
641.5	487.5	11.167	4.58035	-16.7697	-14.3536	-15.7784	-16.892	-15.5304	-15.8012	-21.7214	-19.0227	-11.7845	-16.7081	-13.7842	-13.2907	-18.7034	-16.5261	-14.5181	-14.8904	-22.9303	-18.879	-14.4109	-16.8905	-14.0642	-14.32	-15.8367	-16.0054	-14.4701	-17.6367	-14.081	-18.5343	-17.2038	-14.8155	-13.8323	-20.2779	-14.7095	-14.6964	-13.2597	-17.5941	-16.3612	-14.6097	-15.1876	-15.9001	-13.8573	-15.0116	-14.2733	-12.5876	-12.5373	-17.3712
642.5	487.5	11.1671	4.58035	-17.706	-15.1689	-16.361	-16.7947	-16.3423	-16.8267	-21.6558	-18.5932	-11.1755	-16.5694	-13.8041	-14.674	-15.2421	-17.7234	-15.2882	-16.6777	-19.6863	-20.2434	-14.4241	-19.9161	-14.467	-15.4215	-20.055	-16.2756	-14.2729	-16.6338	-15.6628	-15.554	-16.26	-15.9196	-13.4775	-16.6966	-15.6382	-17.8406	-15.6622	-15.1278	-13.837	-15.4133	-16.6719	-16.5323	-13.9038	-14.9137	-14.3191	-10.9301	-16.2764	-16.379
643.5	487.5	11.1672	4.58035	-16.2889	-14.4298	-15.8596	-16.7252	-15.4492	-16.2855	-21.6222	-17.7825	-12.9955	-14.0609	-13.9814	-15.9479	-12.6752	-19.7139	-14.5996	-19.1391	-17.0458	-20.5691	-15.8596	-21.2189	-15.2598	-15.6348	-23.8494	-17.819	-15.6056	-15.386	-18.8341	-15.006	-15.4225	-14.5801	-13.8167	-13.5782	-16.2613	-15.4786	-14.3881	-14.9699	-12.1911	-16.097	-19.3533	-16.4541	-12.8878	-16.071	-14.8419	-11.7327	-13.6871	-14.0499
639.5	488.5	11.1668	4.58026	-14.088	-15.0065	-17.7271	-17.9004	-17.8661	-12.854	-14.1347	-15.4243	-13.5986	-15.5104	-16.8197	-13.2492	-16.8903	-16.126	-19.608	-17.2259	-16.2272	-16.994	-20.4897	-17.6496	-13.1565	-14.4793	-15.4681	-18.3386	-19.6439	-15.8184	-15.7756	-18.8807	-18.0753	-18.0042	-16.585	-14.6186	-12.6666	-17.3342	-15.3255	-15.0151	-14.3632	-20.1763	-16.7374	-13.1525	-16.0399	-16.4658	-17.0576	-16.9485	-14.2325	-13.5294
640.5	488.5	11.1669	4.58026	-14.7418	-13.6798	-17.9044	-19.0701	-16.0293	-13.5626	-15.7458	-16.1789	-10.8856	-15.7737	-13.322	-14.5802	-18.2344	-15.4638	-15.2818	-17.0561	-18.051	-17.7849	-15.4798	-15.9234	-13.478	-11.6653	-13.5198	-17.3665	-18.0702	-16.8066	-19.0084	-19.5013	-17.8334	-15.8676	-17.8644	-21.9266	-16.4995	-15.162	-13.0642	-20.7398	-14.7489	-18.3534	-14.4955	-15.1082	-18.7213	-15.3996	-16.0533	-14.7481	-13.7916	-15.9884
641.5	488.5	11.167	4.58026	-15.4899	-13.7359	-17.2609	-19.0529	-14.515	-15.5773	-21.159	-17.2016	-9.90456	-17.4079	-12.1966	-16.5891	-17.706	-15.7089	-13.1838	-16.4739	-20.9529	-18.5165	-13.8129	-16.487	-13.7396	-12.1876	-14.5659	-16.0484	-14.7799	-17.1873	-15.6578	-17.8091	-15.8901	-14.1331	-15.3164	-22.1791	-13.9442	-16.0774	-12.2732	-19.3058	-17.0339	-14.5153	-15.8169	-17.8544	-18.8802	-15.9074	-13.065	-15.1666	-13.5834	-17.6977
642.5	488.5	11.1671	4.58026	-14.1558	-13.8662	-17.0451	-18.8521	-15.1896	-18.2837	-23.5224	-18.8039	-11.806	-17.233	-12.09	-17.2595	-14.3757	-17.3223	-14.1355	-16.9098	-20.0446	-18.5997	-14.355	-19.9792	-14.1559	-14.0153	-17.8945	-16.0548	-15.6316	-14.4039	-15.7281	-16.4774	-15.3468	-14.459	-13.9882	-16.1277	-14.8409	-18.6701	-14.1078	-16.8939	-15.0217	-13.8272	-17.6985	-15.529	-16.3072	-14.7267	-12.4842	-10.7337	-17.8167	-17.5467
643.5	488.5	11.1672	4.58026	-14.0976	-13.4822	-14.9553	-17.3113	-16.4846	-18.8827	-27.9056	-19.0376	-14.7357	-13.1282	-12.8829	-16.1593	-12.4948	-18.8772	-13.8533	-18.5506	-17.736	-17.5845	-16.1039	-19.0316	-14.0685	-15.6687	-21.8021	-17.6265	-15.202	-15.2143	-17.6815	-16.6347	-14.304	-14.884	-13.7886	-12.9913	-16.4828	-16.147	-14.7652	-16.5026	-13.617	-14.368	-20.5763	-13.7478	-13.8433	-15.3795	-13.4918	-10.7069	-17.9994	-16.0405
639.5	489.5	11.1668	4.58017	-13.6219	-15.7493	-18.4768	-18.8634	-18.3579	-13.0743	-12.9093	-15.1858	-12.121	-17.426	-17.1721	-12.4252	-14.9013	-16.4106	-21.4338	-17.9937	-16.128	-16.8045	-18.2835	-19.3949	-14.1118	-16.2671	-16.7004	-15.9006	-16.4367	-17.2919	-14.9108	-23.2216	-15.9481	-17.5328	-15.5806	-14.5749	-10.7295	-19.3072	-17.7146	-15.807	-16.7899	-18.828	-17.8446	-12.7092	-14.4006	-16.5278	-14.9671	-15.8363	-14.9328	-12.7351
640.5	489.5	11.1669	4.58017	-16.1644	-14.8235	-19.7036	-19.1673	-15.7377	-13.1217	-14.2436	-14.008	-9.98489	-16.1546	-13.2981	-14.4384	-13.2208	-15.8041	-18.4844	-17.3431	-17.1756	-16.2374	-14.7868	-17.7724	-13.8519	-12.2945	-14.1099	-14.6055	-17.4591	-19.1168	-17.3674	-19.4445	-16.9505	-20.2557	-16.7202	-17.6666	-16.7644	-16.4757	-16.7273	-20.2206	-16.4801	-19.0404	-16.8869	-15.1863	-17.2008	-17.3671	-18.6053	-18.4577	-15.1318	-15.2276
641.5	489.5	11.167	4.58017	-14.1004	-15.2923	-17.8525	-17.3761	-13.6136	-14.9878	-18.8451	-14.8515	-10.0025	-17.252	-11.8494	-18.4641	-14.0136	-15.6889	-15.2015	-16.0352	-17.6554	-17.4509	-13.0973	-16.9722	-14.8444	-12.0044	-14.2353	-15.2252	-14.9376	-15.8403	-18.2541	-15.3265	-14.4629	-14.7034	-16.7761	-20.3796	-15.5439	-17.7092	-15.255	-18.6047	-17.1936	-15.9712	-16.1904	-18.4103	-20.6105	-17.332	-13.1692	-16.2863	-16.5383	-15.4931
642.5	489.5	11.1671	4.58017	-12.9264	-15.5559	-16.2056	-16.9192	-14.6505	-14.9143	-17.4612	-16.7769	-12.8619	-17.1171	-12.0351	-18.7293	-13.3878	-17.4622	-15.3898	-15.53	-18.4655	-17.3667	-14.7295	-18.6708	-15.8932	-13.5252	-15.9529	-15.5797	-15.361	-12.7849	-16.9124	-15.356	-13.5098	-14.2661	-16.0042	-16.7826	-17.0872	-16.0063	-16.3055	-17.5376	-15.4226	-12.3253	-15.9653	-14.9887	-15.2635	-16.4349	-11.0688	-9.97185	-18.6218	-15.5242
643.5	489.5	11.1672	4.58017	-13.1	-14.32	-15.7112	-15.5116	-15.2718	-15.2608	-19.6353	-18.0317	-15.9157	-14.8637	-12.7906	-16.1194	-12.4663	-18.4734	-16.0526	-15.7031	-18.8351	-15.198	-16.0483	-17.1639	-16.3725	-16.0216	-17.9015	-16.3637	-14.6047	-14.4207	-17.0204	-16.914	-14.0571	-15.1291	-15.9886	-14.7127	-17.6797	-15.3565	-16.6215	-17.1212	-14.5606	-11.7049	-17.2842	-13.6474	-14.0624	-15.46	-12.58	-9.76647	-23.373	-17.9885
433.5	556.5	11.1483	4.57438	-18.198	-16.2331	-16.7623	-13.3764	-15.0122	-16.7561	-13.2466	-15.0265	-19.0657	-17.1889	-14.8914	-12.7424	-15.3009	-13.4935	-16.8776	-15.8504	-15.5501	-15.7381	-17.1389	-22.9833	-22.1179	-25.1462	-21.5433	-20.7748	-16.925	-20.4714	-16.4927	-16.7931	-18.5826	-23.526	-16.2696	-17.4594	-22.2359	-17.3054	-20.5202	-19.302	-15.4106	-21.1818	-18.1808	-14.4312	-20.1583	-19.4732	-17.554	-16.9083	-13.4533	-12.4012
434.5	556.5	11.1484	4.57438	-16.8649	-17.2301	-18.6886	-14.3551	-14.5145	-21.6132	-12.6422	-16.335	-17.9499	-19.2847	-19.8495	-12.775	-12.6065	-12.8	-14.9307	-15.3881	-13.9877	-16.6451	-19.4291	-20.2689	-19.1361	-21.7562	-19.4188	-19.2024	-19.1655	-18.8039	-17.332	-18.1593	-20.2812	-19.531	-18.1764	-20.6399	-17.8533	-15.2638	-18.9474	-16.8505	-13.9737	-20.4523	-16.7182	-17.7571	-24.563	-16.7043	-14.7326	-17.4255	-15.4878	-15.1559
433.5	557.5	11.1483	4.57429	-16.0475	-14.2086	-18.1088	-14.8252	-15.1396	-15.3505	-15.7825	-16.0989	-14.4422	-15.5759	-15.1443	-11.5814	-15.7112	-15.8643	-21.9092	-14.8116	-12.6899	-15.1713	-17.3211	-20.6574	-21.2646	-20.3318	-16.994	-20.5666	-17.7438	-19.5953	-19.4231	-17.1916	-21.9104	-23.3007	-15.7668	-16.5998	-20.4969	-16.6776	-17.8138	-17.1904	-17.7257	-19.2443	-16.2144	-19.4314	-16.5208	-17.6969	-21.3338	-16.4235	-13.6202	-11.6689
434.5	557.5	11.1484	4.57429	-16.6665	-15.6227	-18.8887	-14.3006	-15.4091	-16.6869	-14.1451	-16.1936	-15.868	-17.3499	-15.9112	-11.9466	-13.216	-14.6722	-17.2794	-16.6248	-12.4517	-14.8908	-19.9498	-21.0326	-17.499	-21.2667	-17.5389	-18.1554	-21.7997	-19.3559	-18.3781	-18.4285	-24.5196	-21.166	-18.8662	-17.2252	-19.1607	-14.0468	-20.0956	-20.0939	-16.2761	-22.6862	-16.7581	-21.7066	-20.0104	-18.6283	-17.0592	-20.9845	-14.4513	-12.6468
435.5	557.5	11.1485	4.57429	-17.9605	-17.1236	-18.0299	-16.045	-14.9619	-17.9702	-12.7062	-16.5194	-16.2596	-16.4256	-13.8904	-13.3877	-13.3826	-15.915	-15.5285	-15.7401	-13.739	-13.8691	-17.8804	-19.8255	-16.5542	-20.914	-19.546	-16.8377	-21.5363	-20.9341	-17.477	-17.473	-24.5176	-18.9999	-19.3461	-21.5379	-18.7895	-12.0497	-16.448	-18.6482	-15.9238	-23.2169	-17.5861	-21.0549	-21.2266	-17.8335	-16.6325	-20.8696	-15.1602	-16.0879
436.5	557.5	11.1486	4.57429	-16.2694	-16.0129	-15.6651	-17.8604	-14.5712	-16.7785	-14.2682	-15.7588	-16.0618	-16.6036	-14.3145	-12.6354	-13.1493	-21.6533	-15.1128	-16.4844	-14.8569	-13.6034	-17.7774	-20.1919	-17.397	-20.2426	-20.3729	-17.8794	-20.7448	-21.7965	-17.3627	-16.2741	-21.6353	-17.0699	-19.1846	-26.6391	-17.2046	-12.4515	-13.7377	-18.636	-15.8566	-19.9959	-16.3497	-17.321	-19.0742	-19.7063	-17.0217	-18.5918	-18.5415	-17.3932
433.5	558.5	11.1483	4.5742	-12.7615	-14.7832	-18.6815	-16.4582	-16.5428	-15.6533	-18.3619	-17.6395	-14.0633	-13.1798	-14.9665	-12.3118	-14.3917	-19.4158	-21.5953	-16.8896	-12.9757	-17.0397	-20.3066	-18.1683	-20.9686	-18.63	-14.0122	-17.2516	-17.6218	-18.3981	-18.8484	-16.4261	-18.9808	-18.0595	-15.34	-15.1812	-16.9673	-15.046	-16.4765	-14.3357	-16.9382	-15.6696	-16.0493	-16.238	-15.7115	-16.9603	-18.6512	-15.9953	-13.8589	-10.9115
434.5	558.5	11.1484	4.5742	-13.5527	-14.7439	-18.637	-14.6295	-15.8176	-15.3395	-14.9042	-16.31	-15.9004	-13.188	-13.8209	-15.1349	-13.2305	-17.4664	-16.8331	-18.2726	-11.6927	-14.6397	-18.4651	-19.7707	-18.5305	-18.9136	-15.2786	-16.1581	-21.8559	-17.9245	-18.0171	-16.1888	-21.8205	-19.5075	-17.7197	-15.7688	-21.722	-12.2851	-18.6301	-18.8496	-18.0926	-18.9622	-16.2501	-19.3799	-15.7306	-21.5983	-18.815	-20.2881	-14.4297	-11.3855
435.5	558.5	11.1485	4.5742	-16.0411	-16.0443	-16.2296	-16.9097	-14.3387	-18.1742	-13.3145	-16.3527	-14.8537	-14.2766	-12.269	-16.4739	-14.2125	-18.1148	-15.8777	-15.4511	-12.3038	-12.984	-17.3657	-18.7519	-15.8304	-20.9181	-16.8263	-15.406	-22.9766	-22.2049	-17.9961	-17.3011	-22.2498	-20.4106	-17.1435	-17.9382	-18.7047	-11.7349	-15.7527	-20.7746	-15.6079	-24.0344	-17.2818	-22.0279	-19.1332	-20.6034	-19.2961	-18.1815	-14.6355	-16.3288
436.5	558.5	11.1486	4.5742	-15.5596	-15.9521	-14.6395	-19.278	-15.5522	-16.6468	-14.5413	-17.4456	-12.4306	-16.7987	-12.9167	-12.9547	-14.6041	-21.2465	-16.8325	-15.1835	-13.6532	-13.4241	-18.8294	-19.0542	-15.7356	-17.8412	-17.9583	-16.585	-23.4318	-19.0404	-17.4855	-17.7124	-19.9886	-18.179	-16.1014	-18.5135	-16.6395	-13.4112	-13.0811	-19.2343	-13.4479	-21.4371	-15.8335	-19.7578	-19.19	-20.0725	-20.6585	-14.4432	-16.7657	-18.5859
437.5	558.5	11.1487	4.5742	-15.5933	-14.0443	-14.2399	-17.9132	-18.743	-13.7053	-15.8426	-21.5654	-11.4618	-16.0137	-14.0966	-10.8556	-13.4009	-16.9181	-14.2848	-15.5961	-14.4824	-16.8041	-18.8463	-20.1585	-16.1079	-16.1542	-18.9214	-19.1837	-24.3818	-17.7727	-15.552	-17.8113	-15.7133	-16.0928	-14.0121	-16.6051	-15.2092	-16.5201	-12.7422	-15.7328	-13.159	-18.5306	-15.7135	-16.7576	-18.4412	-19.826	-21.3729	-15.6025	-17.245	-15.87
438.5	558.5	11.1488	4.5742	-15.6712	-14.4121	-14.9881	-17.5953	-15.7128	-14.4305	-16.3735	-18.8089	-12.5597	-14.6796	-14.8513	-12.9326	-14.5226	-15.2215	-13.8041	-15.0811	-14.3927	-21.6547	-19.6559	-21.9458	-16.3587	-18.1604	-21.3211	-19.139	-21.7373	-16.415	-14.543	-17.443	-14.0619	-15.297	-14.5532	-15.1752	-15.4435	-15.4469	-13.6241	-15.5495	-12.7483	-16.1609	-17.4912	-16.0401	-16.9301	-20.0448	-17.2343	-16.0125	-14.3449	-13.4663
433.5	559.5	11.1483	4.57411	-13.792	-17.6071	-17.2547	-15.3503	-18.5977	-16.8207	-17.891	-18.5855	-15.2769	-12.7701	-14.9259	-13.44	-14.8187	-19.9173	-20.6056	-18.6025	-15.564	-17.4204	-17.7195	-16.7131	-19.579	-17.4925	-13.6349	-15.8294	-16.0791	-19.8273	-20.1967	-17.446	-16.9695	-16.221	-16.104	-15.6893	-17.1616	-13.1276	-16.3009	-14.6701	-17.6975	-13.9918	-18.3199	-16.4753	-17.2752	-16.4468	-17.4695	-15.5756	-13.6605	-11.3271
434.5	559.5	11.1484	4.57411	-13.6442	-16.4519	-19.074	-15.0922	-16.2531	-16.1857	-15.8218	-18.3459	-18.2103	-12.4082	-13.1752	-16.9531	-14.2431	-17.8619	-16.431	-19.0833	-12.4053	-15.1798	-16.1219	-17.8587	-23.3225	-17.3234	-14.534	-16.2162	-18.2539	-18.2504	-17.6701	-16.9898	-17.7695	-16.0593	-18.3604	-17.371	-21.7201	-13.2962	-16.245	-16.4027	-17.8633	-16.8587	-16.0539	-17.2383	-17.6405	-21.1156	-18.2228	-17.7938	-14.3376	-13.5577
435.5	559.5	11.1485	4.57411	-14.824	-15.936	-17.0334	-16.177	-14.4634	-19.8842	-14.1	-19.2522	-15.727	-13.48	-12.3824	-18.5417	-14.8812	-17.7539	-15.6949	-16.4401	-11.6024	-13.8406	-18.9501	-16.0363	-21.84	-20.4918	-14.6511	-15.6619	-20.8872	-21.8819	-17.4559	-19.2345	-19.2225	-17.0242	-18.0797	-18.6555	-17.8261	-14.4428	-15.9078	-18.6855	-15.1002	-18.8526	-13.8101	-20.7237	-19.8597	-20.3762	-18.5093	-15.0464	-16.796	-16.6525
436.5	559.5	11.1486	4.57411	-14.5795	-16.237	-15.25	-17.8226	-15.627	-16.7892	-14.5814	-22.2325	-12.1253	-15.7389	-13.1027	-13.7963	-15.872	-18.3676	-17.2122	-14.9196	-13.3445	-15.2177	-22.6444	-16.9448	-18.6814	-17.262	-14.5378	-16.2542	-21.9926	-19.5533	-17.277	-19.6115	-18.9615	-17.8182	-17.5621	-17.0423	-16.7536	-15.5619	-14.9906	-17.8965	-12.7818	-18.279	-12.1709	-24.7657	-19.2179	-17.4759	-18.7772	-12.6611	-17.1688	-17.8697
437.5	559.5	11.1487	4.57411	-14.9788	-14.7169	-15.3058	-16.276	-18.1768	-14.3085	-16.0182	-24.446	-11.4913	-15.5188	-13.2862	-11.4057	-16.6248	-16.058	-13.0682	-15.3094	-16.4429	-18.2116	-21.3864	-18.8199	-16.5361	-14.4733	-15.0336	-17.4013	-24.2287	-17.0553	-17.0729	-18.1815	-17.1823	-18.4474	-15.4664	-15.6289	-16.6109	-13.6178	-13.2683	-14.8625	-12.2305	-18.198	-12.2927	-17.6841	-19.5724	-16.512	-20.4218	-14.7235	-15.9367	-15.1937
438.5	559.5	11.1488	4.57411	-16.1378	-14.0757	-15.2738	-16.9328	-16.1873	-15.4862	-16.655	-21.8178	-14.0677	-14.7863	-13.0076	-12.3063	-15.6695	-15.7915	-12.7343	-19.076	-14.6712	-16.9378	-18.9205	-20.9356	-15.9818	-16.0802	-17.5979	-16.6581	-23.3541	-15.8463	-15.1548	-16.1558	-16.8903	-17.4673	-15.678	-14.9139	-16.5631	-11.5177	-15.4549	-15.3793	-11.635	-15.4809	-14.3378	-15.3846	-19.8793	-17.7114	-19.7899	-16.7412	-15.1223	-13.2918
433.5	560.5	11.1483	4.57402	-16.646	-16.9681	-15.4491	-14.1258	-16.3266	-16.7552	-17.0377	-19.1534	-14.2863	-14.2946	-14.7904	-15.178	-14.8993	-19.0824	-21.6042	-14.7308	-18.9689	-15.5785	-17.2015	-17.4512	-18.1598	-16.6289	-15.273	-16.3682	-16.9498	-24.675	-24.6069	-18.4775	-18.4206	-17.3485	-22.9534	-16.913	-18.839	-12.327	-18.0127	-17.6659	-19.7589	-16.8234	-19.6475	-16.8979	-18.565	-18.7772	-19.529	-16.0952	-13.9308	-12.5315
434.5	560.5	11.1484	4.57402	-16.8053	-16.2468	-17.0866	-14.5227	-16.3539	-17.1194	-16.5044	-20.5965	-14.6532	-14.1935	-13.326	-16.1178	-15.1598	-17.2438	-20.7873	-14.7152	-14.2879	-16.8573	-17.4901	-18.4421	-24.3466	-17.3686	-14.828	-18.7311	-17.684	-22.2565	-17.317	-21.1995	-19.8228	-15.2362	-22.9266	-19.3989	-22.76	-14.49	-16.6216	-18.245	-18.4139	-19.1338	-17.0257	-19.1903	-18.7305	-19.47	-16.5693	-15.4221	-14.65	-15.6757
435.5	560.5	11.1485	4.57402	-16.0546	-14.1719	-18.0856	-15.3418	-17.1536	-19.8123	-14.5173	-20.5342	-15.8494	-15.4168	-13.4106	-16.0877	-14.7834	-16.4624	-15.9937	-15.7751	-11.9446	-17.7187	-21.2904	-17.9038	-23.0765	-19.757	-14.8502	-16.675	-17.6783	-21.3901	-15.8118	-18.9357	-18.5735	-14.9633	-20.8349	-18.7024	-16.697	-15.3932	-16.3635	-17.0243	-16.9715	-16.4724	-12.3668	-21.2239	-17.469	-17.8546	-14.7215	-14.1387	-16.9689	-16.8054
436.5	560.5	11.1486	4.57402	-14.6871	-15.2274	-15.817	-16.3627	-18.6249	-16.1136	-14.2402	-23.885	-14.947	-16.164	-14.8118	-14.8147	-14.4782	-16.1349	-14.3761	-15.2692	-13.3928	-17.678	-20.9291	-17.8384	-19.0341	-19.6459	-15.3233	-14.5685	-17.5645	-21.6184	-16.3001	-16.5232	-18.7499	-14.2739	-18.2828	-16.1825	-16.5817	-13.1758	-14.4062	-16.0857	-16.2197	-15.4548	-10.2437	-29.1871	-16.7235	-15.6664	-14.2926	-13.4789	-16.0177	-16.1788
437.5	560.5	11.1487	4.57402	-14.5802	-15.2243	-17.506	-15.9087	-19.7372	-14.6393	-15.958	-24.2763	-13.6175	-15.4404	-13.8013	-12.837	-15.4096	-15.1539	-12.8134	-15.7927	-16.9158	-16.9515	-19.3111	-17.9419	-16.4165	-16.311	-14.9371	-15.2537	-18.8167	-18.9849	-16.1862	-15.6904	-21.1289	-14.02	-16.4068	-16.758	-18.5736	-11.0713	-12.3034	-14.2241	-15.4787	-16.8689	-10.794	-21.0805	-18.3994	-14.7159	-15.6844	-15.1147	-14.4895	-15.1142
438.5	560.5	11.1488	4.57402	-19.0491	-14.704	-16.7789	-15.8787	-18.4024	-16.0502	-17.4762	-19.0743	-15.7342	-15.1475	-13.3663	-12.8811	-14.7867	-15.2288	-12.3797	-14.7421	-16.1769	-14.1611	-16.9849	-17.5052	-16.0736	-16.2885	-16.085	-15.7946	-18.9086	-17.1435	-15.0423	-15.1135	-19.4518	-16.5716	-16.2097	-17.0817	-18.7024	-10.5089	-13.8528	-14.2526	-14.3937	-16.9771	-13.5679	-16.4757	-21.2818	-14.752	-16.8864	-17.0589	-14.855	-14.3278
436.5	561.5	11.1486	4.57393	-16.2994	-14.6855	-18.2012	-16.8328	-18.2972	-16.6687	-14.533	-20.0053	-16.5945	-18.2586	-15.1204	-17.9582	-13.6346	-15.3471	-12.8424	-16.2161	-13.3497	-17.5626	-17.972	-21.4611	-18.3267	-21.9463	-18.2683	-13.1588	-15.7014	-19.1918	-15.2254	-14.5222	-20.2602	-13.3824	-17.1887	-13.4758	-16.6303	-10.6255	-13.3939	-14.348	-18.1284	-15.0675	-10.7883	-20.503	-13.6238	-15.0711	-14.0333	-14.5013	-15.4439	-15.197
437.5	561.5	11.1487	4.57393	-14.8409	-13.9275	-19.3873	-17.715	-18.6571	-16.0108	-16.27	-19.4518	-15.8192	-15.2734	-13.1223	-16.1407	-14.9534	-15.414	-13.0024	-15.7695	-14.6878	-15.5343	-16.6999	-17.9089	-16.9523	-17.6772	-20.2304	-12.8992	-17.4242	-21.103	-17.5078	-14.4004	-23.044	-13.0243	-14.2898	-15.3498	-19.2985	-10.8265	-11.5456	-13.9335	-18.2086	-14.8236	-12.4688	-19.1453	-15.2744	-14.9099	-14.3255	-15.7505	-14.7092	-15.2709
612.5	663.5	11.1642	4.56462	-14.508	-17.8793	-14.1335	-21.6513	-15.4425	-16.3235	-15.862	-18.2493	-16.4756	-18.4794	-13.8822	-14.4747	-11.8287	-13.8746	-12.3594	-15.3549	-15.1306	-13.5032	-11.3798	-14.0609	-17.5357	-16.1353	-13.2474	-16.1574	-18.4008	-18.3808	-17.5889	-18.1061	-17.1764	-18.8716	-19.9802	-19.8549	-17.543	-11.7673	-15.8514	-21.1927	-12.674	-23.532	-16.7519	-18.6313	-17.3416	-16.5896	-13.6497	-11.8148	-18.6743	-14.3111
613.5	663.5	11.1643	4.56462	-12.8956	-18.9036	-11.8398	-18.8194	-16.7936	-18.4062	-15.5878	-15.763	-15.497	-16.8231	-14.1828	-16.5152	-14.2036	-13.6358	-14.5999	-15.4786	-14.3128	-12.3308	-17.0366	-15.2627	-16.4682	-13.3636	-12.5325	-17.0682	-16.8229	-15.3326	-14.47	-17.1827	-15.246	-15.3859	-23.3351	-18.1785	-15.8583	-13.482	-18.9923	-17.1312	-15.875	-16.5852	-16.1645	-20.1521	-13.4404	-17.7038	-15.1163	-11.2264	-17.8551	-14.8547
614.5	663.5	11.1644	4.56462	-12.045	-17.8536	-12.4115	-14.5958	-14.3143	-19.5875	-16.0886	-16.4733	-15.9183	-15.9338	-15.5529	-20.4568	-13.0782	-13.9704	-18.8986	-19.7003	-14.5184	-13.092	-22.298	-16.1308	-13.5752	-12.3693	-15.1017	-18.4733	-18.4897	-14.8924	-11.3943	-16.3171	-13.0576	-13.5467	-22.5537	-14.4151	-15.6994	-12.6705	-14.5389	-15.0297	-17.0801	-13.9781	-14.4119	-16.5399	-12.7698	-18.0942	-17.9803	-11.4764	-17.7536	-15.8025
612.5	664.5	11.1642	4.56453	-16.2904	-17.5114	-15.4812	-19.022	-16.0433	-17.4211	-16.1836	-15.8721	-18.6219	-17.0366	-12.7748	-14.2395	-14.0314	-13.9493	-14.1544	-16.8165	-16.2657	-13.6691	-11.6492	-13.3114	-14.847	-19.3982	-12.9898	-16.7822	-22.5349	-21.0307	-17.0522	-17.4827	-20.697	-19.2934	-19.6304	-21.0557	-16.5852	-12.8572	-16.7696	-19.7016	-13.9925	-18.7278	-17.8489	-19.0786	-22.1587	-18.348	-17.883	-12.6648	-17.5792	-16.5083
613.5	664.5	11.1643	4.56453	-13.155	-17.0993	-13.1433	-20.2042	-16.4927	-20.0869	-14.9645	-15.4111	-17.6291	-15.9412	-13.6696	-15.5096	-17.522	-14.74	-15.7631	-15.2381	-16.0168	-11.714	-13.9191	-15.3049	-15.471	-13.3747	-12.1004	-18.4305	-19.5597	-18.2234	-16.956	-16.162	-15.3586	-17.095	-24.0715	-17.4301	-20.0319	-13.6574	-18.4662	-16.5394	-14.3931	-17.7899	-20.077	-18.2476	-17.277	-17.3475	-16.1608	-12.0802	-17.9151	-17.9298
612.5	665.5	11.1642	4.56444	-17.3904	-18.4942	-19.1128	-17.717	-15.5552	-17.1427	-17.1581	-16.2293	-15.8443	-15.2997	-13.0268	-15.1317	-12.8567	-14.3269	-16.614	-16.1402	-14.929	-14.5325	-13.6919	-14.5254	-15.4117	-20.9569	-13.2804	-15.3154	-25.4965	-22.0504	-17.1058	-17.6414	-18.8108	-15.7687	-18.9173	-20.1806	-13.6347	-13.2831	-17.6226	-19.9247	-16.3016	-16.2667	-19.5153	-17.4803	-21.2483	-18.8503	-17.4976	-14.2012	-16.3442	-19.1165
613.5	665.5	11.1643	4.56444	-14.9645	-16.6209	-16.3964	-19.0235	-16.0228	-18.576	-15.8076	-17.828	-17.1342	-14.535	-14.3398	-15.0984	-15.4056	-16.8042	-18.0543	-15.1946	-14.7906	-12.5567	-14.0691	-17.8165	-15.6042	-16.3117	-12.9709	-16.085	-21.0509	-19.4537	-19.8352	-15.4858	-15.1908	-14.7296	-17.3351	-19.644	-20.034	-14.5206	-17.4333	-16.1793	-15.3147	-18.668	-19.5893	-17.8369	-18.5699	-18.0858	-16.1485	-14.3749	-15.7997	-19.294
374.5	666.5	11.143	4.56459	-12.7534	-15.8957	-19.7131	-15.9301	-14.8099	-12.4687	-13.326	-15.6719	-14.2069	-18.1453	-12.7971	-15.295	-15.3596	-17.2826	-14.8241	-12.975	-16.0218	-11.8688	-14.9732	-18.305	-16.4701	-21.683	-13.6848	-18.527	-16.6144	-15.8243	-12.5692	-16.5197	-16.2486	-15.6211	-13.7238	-11.4391	-18.0389	-15.6292	-15.5689	-14.5911	-13.5135	-15.7822	-14.3876	-14.2433	-16.6585	-13.3149	-14.2873	-19.4123	-20.9525	-17.3183
375.5	666.5	11.1431	4.56459	-13.3091	-17.2073	-20.7042	-16.7232	-15.3507	-12.814	-12.4825	-16.4352	-13.6947	-16.6452	-11.9158	-14.3979	-17.2647	-17.4756	-15.5116	-15.349	-15.644	-10.4231	-14.8341	-20.2029	-17.3471	-20.6528	-16.7946	-20.6783	-16.8406	-16.3378	-13.9394	-17.4992	-16.7727	-18.4742	-12.464	-12.8037	-15.2658	-13.9209	-17.1329	-14.0478	-13.152	-15.4647	-14.6968	-14.6727	-15.6456	-15.7139	-16.961	-21.4518	-20.2705	-14.6411
376.5	666.5	11.1431	4.56459	-14.1019	-17.5686	-19.8656	-16.5417	-14.4888	-12.9215	-12.6373	-16.7545	-14.2964	-15.31	-12.8452	-14.3975	-16.0715	-16.9495	-16.096	-16.6728	-15.1386	-12.4072	-14.6138	-21.722	-18.0842	-19.1604	-20.4013	-22.4345	-15.2263	-18.546	-14.5932	-17.1485	-16.3995	-18.3122	-12.5637	-13.486	-12.7109	-12.0587	-15.4526	-13.7197	-15.1196	-15.8957	-16.5888	-14.2591	-15.29	-18.0647	-20.0016	-21.3265	-21.4744	-16.731
377.5	666.5	11.1432	4.56459	-14.5591	-17.4342	-19.2616	-16.4164	-14.6091	-12.7039	-14.8421	-18.2561	-15.0261	-15.5618	-12.8408	-15.115	-14.2402	-16.2229	-16.0511	-16.3589	-16.2103	-16.6556	-16.0775	-21.8519	-20.7427	-18.9861	-19.409	-24.918	-16.1319	-20.1807	-16.8015	-17.4679	-16.2203	-13.6083	-13.7155	-13.4885	-13.1747	-12.6425	-14.5496	-13.8678	-17.692	-16.2231	-17.8526	-12.6415	-14.5049	-16.9486	-18.3489	-18.3979	-20.5115	-23.6558
613.5	666.5	11.1643	4.56435	-16.3833	-17.4332	-18.1923	-17.1393	-14.999	-19.3671	-17.9552	-20.0966	-16.6503	-15.7632	-14.4774	-16.7573	-13.7006	-18.0132	-21.9452	-15.9206	-15.7725	-14.1029	-16.2159	-21.4808	-15.4802	-19.0613	-14.8169	-15.7169	-18.5964	-19.8689	-17.8814	-15.9139	-15.1254	-14.4721	-13.9219	-14.9285	-15.0699	-15.1705	-14.3955	-15.0105	-16.5055	-18.2865	-16.59	-17.7134	-18.6068	-18.9084	-15.1068	-15.4177	-14.6481	-18.3483
373.5	667.5	11.1429	4.5645	-13.2236	-18.489	-17.9979	-14.352	-11.6503	-13.6559	-13.1704	-17.4471	-19.1612	-22.0808	-13.3482	-16.5145	-15.5403	-19.4709	-14.7154	-11.733	-15.8625	-16.314	-15.5301	-18.268	-17.0743	-18.435	-12.1829	-16.8814	-16.5248	-12.7458	-12.322	-18.0584	-17.7189	-15.6963	-14.3962	-14.4601	-15.0528	-15.2905	-14.9466	-15.8117	-16.3358	-16.0275	-17.4055	-13.6905	-18.7645	-15.329	-16.1841	-20.0126	-13.6879	-16.7155
374.5	667.5	11.143	4.5645	-12.8741	-18.3671	-21.8614	-15.2016	-13.4789	-13.3733	-14.2214	-17.6465	-15.8633	-23.9125	-11.8425	-17.0438	-15.5483	-17.9201	-14.3305	-13.7176	-15.9519	-12.8591	-15.4115	-20.7635	-15.0002	-17.9629	-13.7445	-15.4147	-15.7597	-14.0385	-12.544	-16.7181	-18.1921	-16.1617	-15.583	-13.7381	-16.5575	-14.1462	-13.0401	-14.7715	-15.3451	-15.4222	-14.493	-14.2507	-19.0757	-15.5011	-14.72	-23.0318	-15.7376	-16.646
375.5	667.5	11.1431	4.5645	-14.1078	-18.0281	-20.9816	-15.8692	-16.1327	-13.661	-13.5795	-15.8257	-14.1747	-19.2613	-11.6076	-15.3429	-14.9567	-16.5136	-14.3207	-16.286	-15.9771	-12.0029	-15.5357	-21.1699	-17.142	-18.763	-16.3997	-17.6757	-15.0192	-14.0467	-13.279	-16.7062	-15.7301	-17.0867	-14.107	-14.7246	-14.4812	-12.1327	-12.4405	-13.3356	-12.9107	-14.168	-13.5389	-14.9138	-18.139	-16.6909	-14.9575	-21.498	-17.2381	-15.1122
376.5	667.5	11.1431	4.5645	-15.0216	-18.063	-19.1403	-16.1887	-16.0574	-13.3253	-14.0918	-15.9455	-14.4274	-15.8536	-13.3843	-15.521	-13.647	-16.0482	-15.0581	-17.646	-14.2757	-14.4404	-16.2028	-22.0354	-18.3901	-19.3501	-20.3625	-21.8573	-15.681	-16.308	-13.4298	-16.543	-14.5366	-16.2691	-13.4474	-16.5258	-12.0206	-11.6242	-13.1695	-13.1008	-13.1134	-15.326	-14.5414	-14.4105	-16.5117	-17.2613	-17.5514	-19.24	-22.276	-16.3575
377.5	667.5	11.1432	4.5645	-14.0698	-20.2706	-18.4606	-16.7183	-16.5377	-13.4219	-16.6578	-18.5711	-15.3126	-15.1363	-14.5834	-15.7391	-13.6444	-16.2927	-15.8082	-17.9328	-14.2004	-17.9311	-16.8002	-20.4131	-18.8181	-17.9211	-21.1036	-21.5931	-17.2727	-19.918	-15.1653	-15.4224	-15.5962	-13.1561	-14.3437	-16.081	-11.7747	-14.0991	-15.5825	-12.9412	-14.5971	-16.1468	-15.6869	-13.3734	-14.7327	-17.9562	-16.4315	-17.7135	-24.2792	-18.3021
378.5	667.5	11.1433	4.5645	-15.0312	-18.7446	-18.1913	-16.6115	-21.2465	-15.8636	-17.2152	-19.4644	-17.7867	-16.0857	-15.1743	-14.3192	-14.5551	-19.1805	-15.6788	-20.2754	-15.7497	-18.7181	-17.0173	-20.1181	-22.8572	-18.8306	-20.7801	-18.7652	-16.9152	-21.21	-17.4088	-16.8915	-15.3721	-12.5131	-16.0978	-15.8438	-12.8156	-17.6947	-16.6963	-13.1572	-13.5944	-15.8046	-17.9272	-13.6715	-14.1208	-17.8477	-15.213	-17.6708	-19.9697	-16.2857
379.5	667.5	11.1434	4.5645	-16.5242	-15.7004	-19.1993	-17.2052	-24.4889	-17.049	-16.2784	-19.3796	-20.5409	-16.5472	-15.9486	-13.8001	-14.9396	-19.2039	-16.5682	-18.8168	-16.7749	-19.1538	-18.0115	-21.4347	-21.7389	-19.6377	-19.955	-19.6666	-17.2432	-18.5629	-17.8216	-18.7632	-14.1408	-14.5856	-17.2135	-17.39	-13.5488	-15.8883	-14.5706	-12.353	-12.8348	-13.1777	-17.7183	-15.645	-14.3865	-17.2151	-19.5916	-18.2249	-19.4405	-15.7026
380.5	667.5	11.1435	4.5645	-16.1667	-14.453	-19.0991	-17.253	-18.7854	-15.8877	-14.8324	-16.4742	-17.5512	-17.6972	-16.4367	-13.3605	-14.1855	-18.7432	-19.0023	-16.5851	-17.3233	-19.698	-19.4636	-24.1979	-19.9323	-21.3376	-17.8347	-18.601	-17.9861	-19.9699	-18.9496	-20.6116	-14.7361	-17.0967	-14.191	-16.1761	-14.3724	-15.8791	-14.1479	-13.2716	-15.9167	-12.4681	-18.8146	-17.4735	-15.7838	-16.9739	-24.2792	-17.9609	-20.1877	-18.2315
381.5	667.5	11.1436	4.5645	-14.055	-14.2149	-16.5568	-15.7927	-16.0861	-14.8746	-13.6652	-15.505	-15.8109	-19.6084	-13.1262	-12.846	-12.6878	-23.7269	-19.4495	-16.2951	-19.1563	-15.9876	-21.9344	-24.4702	-21.9373	-25.0897	-18.5891	-17.072	-17.5052	-22.4171	-18.7753	-23.4445	-17.0018	-16.8543	-14.1846	-14.8048	-15.934	-17.4477	-16.7494	-16.0621	-20.3446	-14.2207	-19.3663	-18.0478	-18.0385	-19.5754	-19.7782	-18.5417	-19.28	-19.4813
373.5	668.5	11.1429	4.56441	-14.5716	-18.0125	-17.9567	-12.8861	-12.0813	-14.4863	-14.6278	-19.2357	-21.6544	-19.9374	-12.0149	-16.9503	-15.7344	-18.6513	-14.6553	-12.4315	-16.1604	-15.3518	-17.6163	-19.8407	-16.1963	-20.5978	-12.2581	-15.1057	-17.4872	-14.6398	-14.1714	-21.8677	-16.9588	-14.5702	-15.9128	-17.0378	-15.2312	-14.0339	-16.3668	-17.8308	-18.0843	-15.2168	-18.4274	-17.4875	-19.7064	-17.4832	-17.3796	-28.2598	-12.4707	-16.0206
374.5	668.5	11.143	4.56441	-14.4234	-19.509	-19.5982	-13.7649	-14.7382	-15.9918	-14.3842	-19.0265	-17.5096	-22.6006	-11.1436	-17.441	-15.0611	-17.8772	-14.5648	-14.0502	-15.7342	-14.1574	-18.1169	-21.3221	-13.8094	-17.8775	-13.3581	-13.7303	-15.9419	-14.6044	-13.613	-16.883	-17.3523	-15.7015	-17.9059	-18.4076	-16.1346	-13.1817	-12.9803	-15.5089	-15.6432	-13.4341	-14.5768	-16.4925	-19.8496	-16.599	-14.4203	-21.3818	-13.4003	-15.0579
375.5	668.5	11.1431	4.56441	-15.0971	-18.4199	-20.6956	-14.6783	-16.4697	-15.3499	-13.5052	-18.3363	-14.6708	-19.9981	-12.2603	-16.5742	-14.3586	-20.9342	-14.4613	-16.4674	-16.9803	-14.2854	-18.3573	-22.1844	-16.8694	-19.9609	-15.3703	-15.5651	-14.817	-13.4584	-14.4324	-15.6599	-14.3214	-16.7634	-14.8291	-18.1445	-14.7398	-12.9157	-10.9924	-13.7403	-13.9913	-11.6494	-12.3561	-16.906	-16.5017	-14.0767	-13.5991	-17.0463	-15.6876	-14.7974
376.5	668.5	11.1431	4.56441	-14.262	-20.014	-18.9864	-15.344	-16.3071	-13.9405	-13.8665	-17.0301	-15.1017	-18.4617	-15.3621	-19.9745	-13.8314	-18.7399	-15.1963	-20.699	-15.8059	-16.8569	-18.8942	-21.0147	-17.694	-24.8192	-17.7904	-21.1178	-15.7038	-14.5206	-15.7279	-16.3838	-13.2498	-16.0753	-13.6045	-18.1306	-11.7429	-14.2825	-11.6886	-13.7743	-13.3324	-12.8347	-12.1003	-16.623	-14.5128	-13.1076	-14.2975	-16.2772	-19.9479	-16.3045
377.5	668.5	11.1432	4.56441	-12.6565	-21.4204	-17.1214	-15.1588	-17.7876	-15.1569	-16.5039	-19.3411	-17.438	-17.5482	-17.4621	-20.399	-15.5068	-18.1871	-15.8744	-27.5435	-14.6793	-19.5694	-17.869	-19.6796	-19.083	-22.0888	-20.2701	-20.0135	-17.0787	-15.4048	-17.7739	-16.2684	-14.0546	-14.8045	-14.2685	-16.111	-10.8	-17.191	-14.0592	-13.9018	-12.8957	-13.5434	-13.1754	-14.6774	-14.1177	-14.7769	-14.7611	-16.7519	-21.7451	-14.1519
378.5	668.5	11.1433	4.56441	-13.0318	-19.4046	-16.7804	-14.5879	-20.1961	-16.8414	-16.4188	-19.1745	-20.2652	-16.152	-17.3271	-16.1885	-17.5486	-20.1705	-15.2023	-22.125	-15.5534	-17.419	-17.6668	-19.6464	-25.1208	-20.6436	-21.6577	-17.8111	-18.217	-15.5724	-18.2952	-17.3442	-13.0637	-14.5646	-15.7904	-16.3378	-11.8304	-15.9786	-15.2875	-13.4763	-13.2512	-12.94	-15.1036	-13.6555	-14.6634	-17.6759	-16.4667	-17.531	-19.1677	-12.6723
379.5	668.5	11.1434	4.56441	-14.7086	-15.5585	-17.7531	-16.4791	-21.4578	-15.8929	-17.0424	-17.9682	-18.625	-15.0106	-16.987	-14.8945	-17.6617	-20.1054	-16.8509	-19.3779	-16.431	-16.2648	-19.1781	-20.7959	-23.0501	-19.9394	-21.5326	-18.9566	-18.8037	-15.6293	-17.4195	-18.764	-13.9298	-16.4587	-16.9072	-18.6888	-13.1795	-14.564	-15.5138	-13.454	-13.6361	-13.2964	-16.4402	-15.4793	-15.5668	-18.7068	-18.7566	-17.9214	-18.0496	-14.9409
380.5	668.5	11.1435	4.56441	-15.3159	-12.9252	-18.431	-16.369	-17.5128	-16.2822	-16.4717	-17.1353	-16.4771	-16.2059	-14.6744	-13.2547	-16.2934	-19.6762	-21.6131	-18.3334	-16.3392	-16.6866	-19.9809	-23.2788	-19.74	-19.6389	-19.4266	-19.8907	-17.9972	-16.5124	-18.9302	-20.935	-15.5882	-17.642	-14.8899	-16.7239	-14.0822	-14.633	-17.0806	-14.659	-16.2626	-13.6283	-18.7185	-15.9622	-16.1969	-18.8895	-19.265	-17.6438	-18.6551	-16.8575
373.5	669.5	11.1429	4.56432	-14.8827	-16.424	-18.7402	-12.3019	-14.6348	-14.4832	-14.382	-16.9731	-22.5874	-17.0205	-10.8368	-16.2294	-16.7352	-15.5966	-14.9992	-13.1476	-14.8349	-15.72	-14.8562	-17.7408	-16.384	-17.138	-13.2267	-17.7459	-21.7511	-18.9983	-18.2181	-20.3756	-15.2595	-15.1027	-18.2346	-15.3015	-17.9473	-13.4022	-16.955	-17.4435	-17.4386	-13.7918	-17.8265	-17.8784	-17.1696	-16.7884	-18.1703	-19.5875	-12.7702	-12.602
374.5	669.5	11.143	4.56432	-16.0216	-17.8378	-19.5529	-12.8194	-16.9501	-16.067	-13.7979	-18.0638	-21.5531	-19.8201	-10.3265	-14.0433	-15.7874	-16.0491	-14.5359	-13.174	-14.3146	-15.0806	-17.3241	-20.197	-15.0396	-17.7104	-13.2827	-16.085	-17.1807	-17.6459	-16.0904	-17.624	-15.498	-15.4157	-17.993	-18.0604	-17.9469	-16.2849	-13.3295	-15.4105	-14.3917	-12.8594	-15.5528	-15.9305	-17.5841	-15.0572	-13.9241	-18.7569	-12.7821	-11.7915
375.5	669.5	11.1431	4.56432	-15.8007	-18.7002	-20.6225	-14.1936	-15.7305	-15.0625	-13.2742	-19.8544	-17.517	-18.5816	-12.4407	-13.7063	-14.384	-19.6648	-14.6869	-14.7991	-18.3847	-14.9439	-17.7822	-20.9961	-16.4048	-20.6012	-14.9373	-17.4052	-15.6809	-15.2835	-15.6665	-16.2675	-14.1964	-15.9667	-15.3948	-16.5283	-15.2679	-15.5022	-11.6156	-14.3263	-13.2481	-11.1322	-12.6123	-17.4974	-13.7883	-12.3444	-12.1001	-15.1358	-15.3132	-12.7338
376.5	669.5	11.1431	4.56432	-14.1973	-19.881	-18.0877	-14.9856	-15.2664	-13.7236	-13.4324	-19.7538	-17.2688	-21.3465	-15.0691	-14.8855	-15.0846	-21.5984	-15.3301	-18.248	-18.8094	-15.6122	-18.8544	-19.7174	-18.8776	-27.3702	-17.9197	-21.0194	-15.5858	-15.3703	-16.2209	-18.6164	-13.1845	-16.8381	-14.4365	-14.3573	-11.6282	-16.0104	-11.7982	-14.6052	-12.8139	-11.2942	-11.2989	-17.081	-12.31	-11.8062	-11.882	-15.4371	-18.2676	-15.7987
377.5	669.5	11.1432	4.56432	-12.1294	-19.9146	-15.7232	-15.003	-17.3305	-15.6482	-14.8898	-19.1705	-19.655	-18.4672	-16.1361	-16.3214	-17.4896	-18.515	-17.1494	-18.4424	-16.2757	-15.9407	-18.3288	-20.3618	-22.8054	-24.556	-22.834	-22.1776	-16.2655	-13.8522	-17.2354	-19.4862	-14.5083	-15.8962	-15.1145	-13.2781	-10.438	-14.7102	-12.9162	-14.2581	-12.5819	-10.8217	-11.3927	-14.7649	-13.0263	-13.6984	-13.5263	-16.6514	-18.5552	-14.3665
378.5	669.5	11.1433	4.56432	-11.9869	-20.221	-15.2143	-16.1178	-19.4312	-18.7698	-14.5716	-18.6083	-17.2817	-17.207	-16.8072	-18.7738	-19.6922	-16.9658	-15.3836	-17.1044	-16.4565	-15.8391	-19.536	-20.753	-22.5076	-19.9332	-26.6536	-20.8397	-17.9584	-12.4915	-16.6535	-17.0785	-13.9426	-14.3236	-17.0132	-14.1051	-11.5198	-12.5831	-14.0678	-14.0689	-14.313	-10.9826	-12.7657	-14.3755	-16.1429	-16.248	-18.0359	-17.6228	-18.4223	-13.9313
379.5	669.5	11.1434	4.56432	-13.4255	-15.2254	-16.3955	-18.9738	-18.0761	-19.0337	-15.7444	-18.2081	-15.6315	-14.8606	-14.952	-17.9774	-18.4494	-17.1529	-17.5358	-17.4176	-16.9197	-15.3425	-23.5977	-19.4392	-21.5542	-18.4188	-24.2372	-21.9472	-18.5448	-13.3246	-16.2784	-16.1162	-14.9027	-15.0614	-17.8491	-16.108	-13.9438	-12.5508	-16.732	-14.7415	-16.0212	-13.4303	-14.4106	-15.6772	-18.3787	-17.2798	-18.5332	-18.0716	-19.2566	-17.1006
380.5	669.5	11.1435	4.56432	-14.8706	-12.6861	-17.1882	-17.1705	-15.6513	-16.5943	-15.845	-18.9874	-16.8182	-14.129	-12.2146	-13.6628	-15.716	-19.9703	-25.4475	-19.8321	-17.6081	-16.3883	-21.3777	-19.8784	-21.8027	-17.71	-22.1267	-23.1996	-17.926	-15.2614	-19.1675	-18.7221	-15.8332	-16.069	-16.9639	-15.6432	-14.5726	-13.462	-20.2261	-16.0841	-17.7251	-14.9318	-16.6195	-16.1056	-15.4667	-16.8863	-16.3592	-17.0701	-21.1918	-17.1977
373.5	670.5	11.1429	4.56424	-15.7303	-16.1178	-18.3702	-14.8018	-15.8423	-16.0828	-15.1705	-15.9975	-20.8312	-16.2359	-11.9182	-14.1311	-19.5945	-14.5167	-14.312	-15.2719	-14.0388	-15.8197	-16.3061	-17.3229	-17.8024	-13.6974	-14.391	-20.7892	-23.7279	-17.5305	-22.1787	-19.983	-14.7601	-18.2092	-18.9736	-14.1526	-17.9768	-19.6566	-16.681	-15.7876	-13.877	-12.7485	-17.6295	-17.3458	-14.4809	-17.5837	-18.6971	-18.5359	-13.7485	-10.2828
374.5	670.5	11.143	4.56423	-18.167	-16.5566	-20.6306	-15.629	-17.3664	-16.2829	-14.5589	-17.3682	-26.6027	-17.1948	-11.5265	-11.6329	-16.318	-15.3924	-13.8829	-13.725	-13.659	-17.3001	-16.5967	-20.7291	-18.7118	-14.7602	-13.8875	-19.1307	-18.9681	-18.646	-19.0886	-17.9453	-18.7704	-16.2041	-17.42	-16.2903	-19.992	-15.408	-13.9907	-14.7438	-12.9061	-14.9435	-18.745	-15.3796	-17.494	-17.6837	-14.3593	-20.2847	-13.6794	-9.59083
375.5	670.5	11.1431	4.56423	-16.5751	-17.95	-21.0211	-15.1428	-14.8668	-13.9572	-14.0762	-20.4106	-21.6991	-17.3073	-13.1094	-10.8314	-14.167	-18.4423	-14.9298	-14.3527	-17.8992	-17.7535	-15.4352	-18.5479	-21.5964	-19.5227	-14.7695	-18.09	-16.2542	-17.0588	-16.9973	-16.1262	-15.8553	-14.6409	-16.2016	-15.3826	-16.5218	-12.9533	-13.1622	-15.1996	-12.0553	-12.9298	-14.6611	-17.4546	-14.8409	-13.5107	-11.7615	-15.447	-14.8955	-11.6286
376.5	670.5	11.1431	4.56423	-15.0917	-18.2427	-17.0989	-15.2498	-13.9457	-12.7799	-14.2753	-22.09	-19.958	-19.7816	-13.5265	-11.3968	-15.3708	-18.534	-15.1104	-17.0867	-16.8819	-15.9966	-16.6698	-18.6695	-24.6152	-21.1519	-17.4691	-19.6033	-14.3753	-15.1974	-15.7069	-16.9246	-13.4794	-14.9835	-14.8855	-14.3423	-12.4046	-14.3108	-12.8313	-15.6866	-11.8384	-11.6564	-13.8042	-19.1088	-13.0484	-13.1345	-11.1736	-15.5377	-16.7189	-15.8491
377.5	670.5	11.1432	4.56423	-13.5859	-17.6168	-14.532	-15.3128	-15.0242	-13.6135	-15.0308	-18.4399	-18.6245	-17.3676	-14.8893	-13.4448	-16.2918	-15.7597	-16.8033	-16.9777	-15.2005	-14.8604	-20.0498	-23.5068	-23.2219	-19.6415	-20.6409	-22.6487	-15.6097	-13.7761	-15.8879	-18.24	-15.3848	-12.7071	-15.0019	-12.9954	-10.7957	-12.2233	-13.4818	-13.7136	-13.1637	-10.4536	-13.4965	-16.6135	-13.3976	-14.6742	-12.6674	-15.9378	-16.3913	-16.7614
378.5	670.5	11.1433	4.56423	-13.0514	-16.8534	-13.9393	-15.4574	-17.3764	-15.7386	-14.1678	-17.423	-14.4147	-16.6265	-17.6559	-18.2479	-16.7029	-15.1879	-17.9301	-15.599	-16.4627	-15.3821	-20.588	-25.627	-19.6169	-17.9677	-22.5727	-23.1207	-19.0082	-13.7057	-16.5629	-14.9431	-17.3235	-11.2309	-16.888	-13.4196	-12.1603	-10.6473	-15.0613	-13.3723	-14.5928	-11.6407	-13.4216	-15.945	-17.6665	-15.1991	-16.6636	-16.0463	-16.7456	-17.9012
379.5	670.5	11.1434	4.56423	-13.5075	-15.3558	-13.9846	-17.516	-17.0617	-16.4003	-14.5709	-18.9657	-14.1609	-15.3837	-15.2711	-18.9341	-16.756	-16.4368	-20.0958	-16.5963	-15.9923	-16.2784	-23.4308	-20.2103	-19.4271	-18.8432	-23.3874	-24.5507	-19.862	-15.0492	-17.6861	-15.0556	-17.1826	-12.3441	-19.5228	-14.0333	-15.974	-12.1924	-18.1387	-15.0061	-14.5224	-15.394	-14.4797	-16.4482	-20.4989	-16.6994	-20.1873	-17.9149	-19.5247	-18.7751
380.5	670.5	11.1435	4.56423	-15.531	-14.6207	-14.4713	-18.2701	-14.0608	-15.3036	-14.9403	-21.97	-16.2206	-12.6329	-12.8036	-14.4661	-14.9985	-18.8733	-23.4819	-20.7324	-17.5908	-18.2554	-22.4897	-20.3461	-21.5357	-18.9699	-22.7634	-25.7375	-20.6288	-17.3586	-20.2838	-17.7518	-15.8968	-14.9379	-19.9183	-13.7785	-15.9257	-13.8221	-15.719	-15.4954	-15.9409	-15.0333	-16.6603	-17.1739	-15.1375	-16.3348	-15.6838	-16.7284	-23.3339	-16.5287
373.5	671.5	11.1429	4.56415	-14.2306	-16.8101	-18.0645	-17.1382	-14.5389	-16.0122	-17.5062	-16.6553	-18.2673	-17.8978	-13.7479	-13.8076	-17.2608	-14.9227	-14.3875	-15.8628	-13.6978	-16.812	-16.6295	-17.2658	-17.6282	-12.8788	-15.6625	-16.9172	-17.3801	-14.4905	-23.2225	-20.232	-14.2673	-19.7235	-18.6861	-14.5963	-14.5739	-16.5526	-17.134	-15.5918	-12.1854	-12.7678	-15.1363	-16.771	-14.9812	-15.7493	-16.0155	-17.9846	-13.9876	-9.98187
374.5	671.5	11.143	4.56414	-15.2669	-17.2509	-19.6918	-17.8545	-17.5056	-15.3875	-15.7668	-17.6466	-19.0786	-17.8316	-15.3922	-11.7877	-15.9392	-15.9511	-13.3543	-14.6952	-13.156	-17.7194	-17.2497	-17.7713	-20.0837	-14.0852	-15.6601	-17.5502	-18.5457	-18.3037	-20.5624	-19.2031	-17.5103	-16.8658	-19.2879	-16.2017	-18.6152	-11.612	-16.3484	-16.5418	-13.282	-14.6651	-18.3628	-15.3865	-18.1065	-18.4499	-16.6731	-18.7777	-14.9374	-10.4356
375.5	671.5	11.1431	4.56414	-14.372	-18.0605	-21.7098	-15.3178	-15.2485	-13.1835	-15.5026	-22.0358	-19.9088	-18.2926	-16.001	-10.8968	-14.7513	-18.4344	-14.3724	-15.7547	-15.7799	-20.3717	-16.0521	-15.7761	-20.8356	-18.4577	-16.0349	-17.1544	-16.994	-16.747	-19.4414	-14.7298	-17.4508	-13.4046	-17.3679	-15.8809	-15.8542	-11.5336	-16.9765	-16.1846	-12.2162	-13.9817	-16.4037	-15.3953	-18.7136	-16.2675	-14.4852	-15.9951	-15.9995	-13.6002
376.5	671.5	11.1431	4.56414	-14.348	-16.9188	-17.151	-15.4395	-13.259	-12.1527	-16.5371	-23.1081	-20.3159	-18.0283	-14.2092	-12.0017	-14.7963	-17.3471	-14.8009	-16.4383	-15.2124	-18.7838	-15.951	-17.0065	-22.2908	-17.3168	-16.1005	-17.9661	-14.5576	-13.6503	-17.7284	-13.2597	-14.5418	-12.1456	-16.3489	-15.5019	-12.1349	-12.4965	-16.5763	-15.4312	-12.0103	-12.0227	-14.5088	-18.1164	-16.5434	-14.8594	-13.9804	-14.6429	-16.3255	-17.3045
377.5	671.5	11.1432	4.56414	-15.0188	-15.7657	-14.3074	-16.4582	-13.3399	-12.3959	-15.5358	-18.0641	-18.9098	-17.0286	-15.8359	-14.6234	-14.296	-14.7633	-15.9305	-14.8938	-13.6484	-18.377	-18.8178	-24.0834	-20.5087	-17.1652	-15.4243	-19.0158	-14.6867	-12.582	-17.0012	-14.4011	-15.4927	-11.514	-14.2571	-15.627	-11.5237	-10.4333	-16.2477	-12.7188	-14.6099	-10.6077	-15.2523	-18.5259	-15.7184	-15.997	-13.8771	-13.4975	-15.186	-17.9019
378.5	671.5	11.1433	4.56414	-15.7602	-15.2796	-14.2686	-16.0632	-15.3452	-13.4315	-14.3056	-16.1752	-16.0741	-16.1864	-20.3844	-16.7314	-15.1246	-15.423	-19.191	-14.6334	-14.8894	-19.6176	-21.1315	-30.0064	-18.837	-17.1936	-17.367	-18.2823	-19.3118	-15.2614	-18.042	-15.035	-16.7512	-10.8995	-12.69	-15.2575	-14.16	-10.8617	-18.9532	-12.0563	-13.3038	-12.5591	-17.0537	-18.8904	-17.4591	-17.9679	-14.8253	-13.9809	-15.3968	-19.5987
379.5	671.5	11.1434	4.56414	-15.3748	-15.2845	-14.0569	-16.9222	-17.3037	-13.892	-14.8601	-17.781	-16.0134	-14.5466	-20.2449	-16.635	-16.1846	-17.1067	-20.1451	-16.8114	-15.1875	-19.0553	-19.9225	-25.0333	-19.944	-22.3519	-18.3617	-19.9308	-24.0126	-19.6031	-21.0076	-16.0365	-15.8229	-11.8699	-14.6711	-14.6473	-17.1308	-14.1616	-19.6932	-13.742	-12.3592	-17.9943	-16.8646	-17.7534	-17.8835	-19.3943	-17.4363	-16.1355	-18.9312	-17.2232
380.5	671.5	11.1435	4.56414	-17.4495	-15.7817	-13.1964	-18.4168	-14.4952	-15.0631	-15.9365	-20.9378	-15.8244	-12.5331	-17.4221	-15.5123	-14.4949	-16.8777	-18.1811	-18.7124	-17.3134	-20.0662	-19.9596	-25.6259	-22.5895	-21.498	-19.1385	-21.109	-28.3004	-19.3658	-23.4279	-18.131	-16.2868	-13.9157	-19.9857	-14.0057	-18.1	-14.2657	-15.8058	-14.1103	-15.1347	-14.2649	-18.8764	-18.3278	-16.0972	-18.7659	-14.7743	-16.5642	-22.6107	-16.503
373.5	672.5	11.1429	4.56406	-14.3772	-18.5471	-17.856	-16.8864	-14.3592	-14.6191	-16.6041	-16.8489	-16.5706	-20.3009	-14.1192	-14.6141	-14.7456	-16.3251	-15.9387	-14.6801	-13.124	-19.8659	-14.7761	-16.5091	-16.4467	-12.8967	-19.0615	-15.2591	-15.3262	-13.4839	-20.5114	-19.1147	-14.5005	-17.1349	-18.0129	-15.7943	-13.2888	-13.3614	-17.9729	-15.5911	-13.3065	-14.6877	-13.2885	-16.9999	-15.656	-15.3628	-15.1816	-16.2437	-13.5115	-11.6771
374.5	672.5	11.143	4.56406	-13.7252	-18.5217	-17.2636	-16.2299	-16.9603	-13.4646	-15.8235	-16.0433	-15.5211	-21.5849	-16.2702	-14.3567	-15.4539	-16.5771	-13.6934	-14.4499	-11.7189	-18.6594	-17.1399	-16.0132	-18.5684	-14.6222	-18.767	-16.3881	-16.3476	-17.9185	-18.1729	-18.4438	-17.5586	-15.3411	-19.2411	-16.9887	-16.1995	-10.9597	-19.6053	-15.5683	-15.2192	-12.9243	-14.9558	-14.9476	-16.4906	-16.4255	-19.4728	-17.7767	-15.123	-14.8882
375.5	672.5	11.1431	4.56405	-12.8656	-17.7242	-20.9091	-14.3756	-16.2152	-12.2668	-16.6347	-18.5374	-16.4819	-18.7703	-18.675	-13.9554	-15.9942	-19.208	-13.922	-16.8856	-12.6071	-17.9845	-17.533	-16.3666	-19.3364	-18.3609	-19.1581	-16.258	-17.0804	-16.5642	-18.2813	-14.8816	-18.2647	-11.7143	-14.8781	-16.4956	-13.6719	-11.7308	-19.1785	-13.9332	-13.7154	-12.3182	-15.461	-12.5609	-18.5458	-15.1165	-19.7616	-15.6107	-17.7584	-18.9022
376.5	672.5	11.1431	4.56405	-13.1852	-15.5088	-17.5667	-15.2121	-14.0462	-12.1985	-18.5033	-21.4034	-19.7067	-16.2508	-16.8869	-15.1611	-15.9467	-18.0985	-14.1606	-15.9597	-14.6473	-17.8431	-15.8518	-19.5815	-20.4276	-17.7861	-16.3172	-16.5451	-16.2515	-13.2683	-16.8646	-12.704	-16.7418	-10.0099	-13.8028	-18.2577	-10.848	-10.932	-19.2196	-12.6469	-13.096	-11.4412	-14.2657	-13.4733	-17.77	-13.589	-19.1559	-13.6606	-18.5104	-20.3553
377.5	672.5	11.1432	4.56405	-14.9022	-14.8942	-14.7662	-16.6718	-12.9495	-12.4415	-13.9743	-17.9755	-21.0562	-16.2857	-18.6249	-16.9514	-14.3913	-14.0596	-15.3154	-13.4239	-15.5959	-19.0431	-16.2189	-24.7761	-20.8701	-16.3195	-15.83	-17.8609	-15.1167	-13.1166	-15.048	-14.4222	-16.4264	-10.186	-12.6708	-19.8577	-11.4657	-9.55479	-19.757	-11.452	-15.5242	-10.4086	-15.8913	-15.4332	-17.1007	-13.482	-16.3049	-12.7738	-15.8621	-17.9082
378.5	672.5	11.1433	4.56405	-17.0529	-15.7858	-15.7693	-15.977	-14.4228	-13.9266	-12.2815	-15.5576	-18.246	-16.9793	-19.2521	-17.125	-15.5399	-15.0584	-18.9846	-13.3643	-15.5615	-19.5145	-18.29	-24.3643	-18.7299	-17.1825	-17.1863	-16.9775	-17.3442	-16.5175	-16.3622	-16.5652	-17.1185	-11.6531	-10.8404	-17.45	-15.395	-11.9364	-21.6876	-11.6632	-12.939	-11.5172	-18.799	-17.7742	-16.9392	-14.7785	-14.7406	-13.9676	-15.0659	-17.7957
379.5	672.5	11.1434	4.56405	-16.2536	-15.9162	-15.5077	-16.042	-17.815	-16.1448	-13.9336	-16.9066	-17.2537	-15.709	-17.996	-16.614	-16.85	-16.7595	-18.511	-15.9654	-15.1014	-18.8668	-17.7492	-26.4393	-19.1998	-21.4379	-16.776	-16.9317	-22.7447	-19.5008	-20.1154	-17.2247	-15.4992	-12.3382	-11.7394	-16.5952	-18.2678	-16.2274	-19.5103	-13.7459	-12.1225	-14.5559	-16.5174	-19.0731	-16.2557	-19.0851	-15.244	-15.4599	-16.8497	-19.074
380.5	672.5	11.1435	4.56405	-17.8669	-15.1381	-12.9205	-16.7215	-16.8371	-17.8621	-15.7718	-19.7909	-16.5532	-14.2827	-17.1985	-16.183	-14.1679	-15.7469	-16.394	-15.9179	-16.2461	-19.4681	-17.3306	-27.8965	-24.1704	-20.7483	-16.3173	-18.4196	-28.718	-17.8921	-21.5527	-18.2429	-15.0227	-12.4693	-15.4308	-15.6299	-18.8054	-14.5825	-18.8174	-14.0651	-14.5221	-12.5206	-16.8984	-20.5802	-16.5769	-19.4026	-14.2534	-16.2209	-17.6652	-20.215
373.5	673.5	11.1429	4.56397	-16.6328	-16.3928	-17.2756	-16.8391	-16.2942	-15.747	-15.9513	-16.9667	-16.2069	-18.8129	-15.5061	-16.0101	-14.9155	-17.6751	-15.0361	-13.8178	-12.9363	-18.6795	-13.8847	-16.1692	-15.0039	-12.8969	-17.0752	-13.9615	-13.695	-15.5134	-16.0136	-14.611	-17.0964	-16.9079	-18.8259	-17.9101	-14.0218	-13.335	-19.5788	-14.6193	-15.0308	-18.6861	-14.6936	-16.7576	-17.0087	-15.9639	-16.8743	-15.2461	-13.4763	-13.9507
374.5	673.5	11.143	4.56397	-15.4855	-16.0474	-15.4751	-15.0856	-17.2065	-14.1206	-15.3635	-15.3934	-15.5635	-19.1623	-17.8586	-15.8708	-14.989	-17.3173	-14.1679	-14.8417	-10.6204	-18.0209	-14.1154	-15.9146	-15.2041	-14.3027	-19.3608	-15.922	-14.8146	-18.0011	-16.5021	-13.9914	-18.4421	-14.6887	-18.9906	-20.6604	-16.2461	-12.8231	-22.1243	-14.0493	-17.721	-14.7078	-14.1602	-15.3652	-16.6955	-18.2079	-21.2797	-17.3926	-14.7669	-15.9056
375.5	673.5	11.143	4.56396	-14.6473	-16.6719	-17.453	-14.2718	-15.8372	-13.219	-17.0009	-16.014	-16.1413	-18.2833	-18.6601	-16.8591	-15.6339	-19.1664	-14.646	-16.9756	-10.4089	-15.6771	-14.1886	-18.1833	-18.9312	-16.3041	-21.5177	-15.429	-15.7863	-16.1058	-16.125	-13.9201	-18.0335	-11.393	-13.3544	-17.0979	-13.4306	-13.6566	-19.0619	-12.333	-16.4453	-12.6197	-15.1866	-12.5809	-17.687	-14.8001	-21.7088	-15.0846	-17.9534	-19.2634
376.5	673.5	11.1431	4.56396	-14.4111	-15.5127	-16.5788	-16.226	-14.1226	-12.9093	-17.8141	-18.0913	-19.1954	-16.7881	-19.3977	-16.6685	-15.7727	-18.0395	-13.3089	-15.9486	-13.2123	-14.7266	-13.7056	-19.2301	-24.5746	-17.2929	-18.2234	-15.6609	-15.8717	-12.9209	-15.485	-13.7273	-17.4382	-9.68609	-11.4613	-18.0849	-10.9996	-10.3357	-18.2329	-10.9576	-14.7478	-12.0312	-15.4728	-12.4196	-17.1568	-13.2598	-19.368	-13.1321	-21.5316	-20.2812
377.5	673.5	11.1432	4.56396	-15.4548	-15.2739	-14.9361	-16.872	-13.0626	-12.9254	-13.7628	-17.7899	-20.0574	-16.6572	-21.058	-16.2234	-14.6329	-14.1488	-12.9503	-15.172	-17.0396	-15.6185	-14.5604	-19.6867	-25.1406	-17.5592	-17.9919	-18.434	-16.486	-13.471	-14.5813	-14.7473	-16.2346	-9.27548	-11.963	-20.3656	-12.4431	-9.49173	-17.4762	-11.2652	-15.0147	-11.5276	-17.5898	-14.4652	-16.603	-13.3295	-16.9407	-13.4058	-17.3263	-17.4082
378.5	673.5	11.1433	4.56396	-15.9126	-15.7636	-16.2338	-15.7965	-15.3556	-15.7573	-12.8016	-15.8813	-16.5593	-18.5624	-16.964	-16.6788	-16.128	-14.2772	-15.7729	-15.0829	-17.7957	-16.9024	-19.363	-19.4713	-19.9457	-18.1449	-19.8499	-18.4369	-18.1713	-17.5695	-15.1289	-15.3415	-17.2861	-11.5217	-12.0204	-16.9853	-15.93	-12.8087	-18.4076	-12.2177	-13.6746	-11.5684	-16.5131	-17.78	-17.5634	-12.2569	-14.9324	-14.2834	-14.2902	-15.0884
379.5	673.5	11.1434	4.56396	-14.573	-14.9109	-15.5625	-15.0601	-18.1562	-20.0658	-14.1201	-17.6366	-13.9832	-17.1571	-15.8967	-15.6634	-16.3718	-15.8656	-17.7154	-15.9377	-15.9098	-17.6109	-17.7975	-21.3977	-18.6473	-18.211	-18.2969	-17.0999	-19.7451	-18.1587	-17.475	-16.9422	-16.0349	-13.0544	-12.2292	-16.3155	-16.8514	-15.3452	-19.4899	-14.2768	-13.2872	-13.9553	-14.1658	-18.7959	-17.1474	-13.1882	-14.8171	-14.2974	-15.2075	-14.8813
380.5	673.5	11.1435	4.56396	-15.8284	-14.7202	-13.1528	-14.8552	-16.0036	-18.5561	-14.5828	-18.3115	-13.8376	-14.6198	-13.2713	-15.0325	-14.2041	-16.0282	-16.3983	-14.8353	-15.2577	-18.7406	-16.9872	-24.0785	-19.3644	-19.0577	-17.2468	-18.2297	-22.562	-17.2492	-18.2531	-18.3771	-14.6855	-12.6571	-15.2691	-16.3166	-16.346	-14.6578	-20.3047	-15.2079	-15.0414	-12.8571	-15.203	-19.9818	-17.3036	-15.0718	-15.3009	-14.7352	-17.8897	-17.9311
374.5	674.5	11.143	4.56388	-15.8979	-14.5755	-14.4111	-16.6302	-17.994	-16.2408	-15.7287	-17.4856	-17.1056	-18.8123	-17.4038	-17.0018	-14.1164	-18.3435	-13.9233	-15.1272	-11.0611	-11.4705	-11.9542	-17.7062	-15.09	-14.6969	-19.7306	-17.1021	-15.7648	-20.0039	-15.1251	-12.4422	-23.0348	-15.8079	-17.6825	-20.1154	-21.4682	-17.9814	-19.136	-12.9956	-19.0049	-19.2559	-17.471	-20.6984	-22.2818	-22.6116	-18.9495	-15.6835	-13.7966	-14.2383
375.5	674.5	11.143	4.56387	-16.2709	-16.5489	-14.9269	-16.2173	-15.9986	-15.6068	-15.8386	-16.4151	-19.7114	-19.613	-18	-14.5388	-15.4068	-17.8552	-14.6863	-15.6803	-10.4819	-12.1313	-11.7909	-17.9302	-17.2247	-13.2841	-20.1348	-16.3178	-15.5434	-16.3051	-16.7341	-12.9367	-21.126	-13.2454	-14.2219	-18.8566	-17.1345	-13.8824	-17.5042	-11.3268	-18.0412	-14.3968	-17.9808	-16.1716	-24.622	-16.7239	-16.6532	-13.0041	-16.0982	-17.0982
376.5	674.5	11.1431	4.56387	-16.8382	-16.8051	-17.3108	-18.1641	-14.3373	-14.1382	-15.8696	-16.7396	-19.7179	-18.3284	-18.0304	-14.1735	-16.5278	-16.0576	-13.1825	-15.0564	-13.1792	-12.6809	-11.785	-15.0133	-22.9576	-14.2288	-18.3563	-16.637	-13.9934	-13.0646	-18.1988	-13.0163	-17.7814	-11.3676	-11.7316	-18.711	-14.4947	-9.8155	-18.7418	-10.5422	-16.0213	-13.1641	-17.8597	-14.8299	-16.9553	-15.3978	-14.3805	-12.4141	-20.7511	-18.4665
377.5	674.5	11.1432	4.56387	-17.1659	-16.9726	-15.7249	-18.9395	-14.8744	-14.2144	-15.4376	-17.1632	-17.2789	-18.0571	-19.5581	-16.7749	-15.6244	-14.577	-11.4747	-17.0827	-18.6427	-13.0944	-12.5666	-14.8455	-27.1431	-16.6964	-17.5325	-19.5749	-16.4625	-14.055	-18.2209	-13.5407	-15.9702	-10.2011	-12.2416	-18.8761	-14.3287	-10.696	-15.4958	-12.308	-14.7662	-14.0916	-16.6377	-16.6248	-15.149	-15.8555	-14.6434	-13.5446	-15.5817	-16.0435
378.5	674.5	11.1433	4.56387	-16.5288	-16.1625	-15.3952	-16.8209	-18.8085	-16.4717	-16.7122	-17.1736	-15.8951	-20.1943	-17.38	-17.5495	-15.2454	-14.4265	-13.0458	-17.7192	-17.9684	-15.457	-17.1617	-16.8258	-22.0419	-18.5513	-17.7904	-21.5418	-16.3277	-17.9996	-16.4635	-13.176	-16.3684	-12.1086	-15.9343	-15.7941	-14.3272	-14.1045	-15.5957	-13.1709	-13.7712	-14.6707	-13.4728	-19.5986	-17.2648	-14.57	-15.5988	-13.3874	-12.8016	-12.5282
379.5	674.5	11.1434	4.56387	-14.5356	-13.9408	-15.0132	-16.5577	-21.5941	-19.2062	-16.4383	-19.0497	-13.9938	-16.3377	-15.5326	-14.3836	-14.4037	-15.267	-16.6397	-15.4712	-17.0932	-18.7987	-18.2864	-19.7886	-18.7623	-17.3456	-18.4872	-20.3322	-14.8217	-15.6632	-16.1139	-15.2213	-15.1092	-14.5498	-15.1817	-15.9469	-14.9431	-15.7356	-19.3109	-14.3951	-14.8667	-15.7736	-13.1914	-17.1448	-18.813	-14.0518	-15.6261	-13.5386	-14.3048	-12.1015
380.5	674.5	11.1435	4.56387	-14.0601	-14.4472	-14.3592	-14.1718	-16.5089	-17.2007	-15.5584	-16.6964	-13.8997	-12.9068	-12.7796	-14.3035	-13.8388	-16.466	-15.9938	-14.8315	-15.2566	-19.7495	-18.4849	-20.6118	-18.3967	-17.8885	-19.8383	-19.9204	-17.8306	-16.1692	-17.9268	-17.4437	-14.6716	-14.7619	-17.1803	-16.6086	-14.813	-13.6073	-19.9607	-15.6172	-17.2142	-15.6129	-15.5898	-17.1391	-17.2467	-13.2188	-15.6388	-14.8517	-17.0176	-14.6491
379.5	675.5	11.1434	4.56378	-15.6241	-15.3677	-16.6326	-16.0026	-20.4706	-15.5759	-16.5253	-18.1936	-15.5361	-15.6177	-14.381	-15.3951	-13.5622	-14.0864	-15.0384	-17.1045	-17.4616	-16.9164	-15.4667	-18.7164	-20.0575	-18.5129	-17.3387	-21.8861	-13.6458	-17.8518	-15.3928	-16.058	-13.38	-16.9993	-17.0063	-17.0532	-15.6887	-11.1256	-20.2018	-18.3165	-16.1608	-17.5015	-13.8162	-16.677	-18.115	-14.0327	-16.973	-15.203	-13.4747	-11.4778
380.5	675.5	11.1435	4.56378	-14.2273	-16.0401	-16.4481	-12.9901	-16.3184	-14.7653	-17.5154	-16.4352	-16.8831	-14.0112	-12.2836	-14.9891	-13.7301	-15.5621	-16.4332	-15.6612	-15.5046	-19.3528	-17.6781	-19.4665	-19.5369	-18.5303	-20.5021	-19.6163	-16.3426	-16.4257	-18.3572	-16.7108	-15.1732	-17.1944	-15.9357	-17.8116	-16.1055	-10.0454	-20.1834	-16.7117	-19.4226	-16.629	-16.3737	-15.6956	-17.6723	-13.4466	-16.117	-18.5004	-14.7639	-13.3212
471.5	684.5	11.1516	4.56288	-14.2535	-15.029	-18.5686	-16.1595	-13.6334	-15.7324	-17.3026	-14.5229	-15.4769	-14.5758	-12.2579	-14.4605	-13.3929	-16.2943	-20.2312	-15.4224	-20.4034	-20.9891	-21.2457	-18.0118	-16.0235	-17.9801	-18.0182	-20.7643	-18.3394	-16.559	-16.7321	-19.0688	-12.7516	-14.471	-12.4973	-15.6703	-14.6134	-16.3484	-16.8023	-12.7004	-14.8601	-16.0062	-17.6672	-17.5186	-16.9546	-16.0543	-17.3279	-20.5654	-15.8627	-18.0104
469.5	685.5	11.1514	4.56279	-12.9903	-16.57	-18.197	-13.3862	-14.1336	-17.2752	-15.9699	-19.6554	-15.1743	-16.9254	-13.4136	-20.6192	-14.4573	-16.0075	-18.0195	-15.36	-14.9651	-19.8517	-18.0409	-16.4808	-19.7624	-17.4687	-20.6813	-18.6511	-18.0773	-18.7441	-17.7682	-17.3573	-14.0234	-11.5986	-14.4052	-15.029	-13.6048	-14.4616	-15.3905	-12.107	-17.2225	-13.0777	-15.017	-14.8201	-16.3835	-17.9547	-18.8583	-19.1973	-14.8491	-15.6741
470.5	685.5	11.1515	4.56279	-14.9103	-15.0678	-17.6057	-13.6268	-12.229	-17.7395	-16.548	-21.7476	-15.132	-13.9837	-11.9087	-18.5579	-15.1025	-17.1076	-21.0443	-15.1487	-15.5793	-24.0241	-23.3138	-17.5323	-21.4301	-16.9998	-19.709	-22.5116	-22.3783	-20.3958	-16.3802	-20.5138	-12.9535	-11.2246	-12.2435	-16.3462	-13.9364	-17.388	-14.8203	-10.9304	-17.759	-16.1707	-15.261	-18.7405	-16.2705	-17.0931	-17.911	-18.9531	-15.7317	-17.6241
471.5	685.5	11.1516	4.56279	-16.268	-14.4563	-17.3796	-14.3681	-12.6765	-16.2374	-16.423	-18.205	-14.9831	-15.1768	-12.9301	-16.0034	-15.5947	-16.24	-23.5467	-15.5733	-17.2376	-23.6981	-22.7194	-17.6844	-18.9711	-16.4151	-15.9797	-21.0182	-25.1071	-18.657	-17.161	-24.3589	-14.6061	-13.7653	-12.1701	-16.4111	-13.3406	-19.81	-15.4063	-11.1485	-15.0047	-17.8115	-15.826	-17.3813	-15.7802	-16.4232	-18.7885	-18.1795	-15.9679	-19.1515
469.5	686.5	11.1514	4.5627	-15.1662	-15.9807	-15.3465	-14.1893	-15.3223	-18.3267	-13.9022	-19.6664	-14.8574	-17.6903	-14.3817	-16.628	-16.194	-14.4501	-18.5388	-14.327	-14.5006	-20.4749	-19.7076	-20.3726	-17.2846	-17.8142	-19.1145	-16.5566	-17.4473	-18.0227	-18.29	-18.6452	-16.8944	-11.5179	-16.1371	-12.8038	-15.518	-15.2658	-15.6709	-12.9483	-15.1572	-12.3046	-13.2238	-14.3698	-16.5244	-15.1925	-17.3257	-15.6612	-14.7633	-15.3333
470.5	686.5	11.1515	4.5627	-16.0526	-15.244	-15.8799	-13.9013	-13.0288	-17.4838	-14.7356	-19.3777	-14.2197	-15.8709	-13.7759	-15.6804	-17.3555	-15.2188	-20.4405	-14.1848	-13.973	-22.5323	-22.4716	-18.0562	-20.7972	-16.4303	-16.9682	-16.283	-18.7906	-21.5538	-15.8429	-19.9744	-14.3977	-12.6351	-15.0077	-14.9078	-14.9575	-17.2254	-15.2371	-10.9025	-14.5637	-16.2167	-14.1643	-15.5869	-15.8266	-14.8939	-16.5875	-16.2064	-16.8735	-17.6325
471.5	686.5	11.1516	4.5627	-16.1146	-14.1366	-15.6166	-13.7777	-13.7872	-16.3266	-15.7904	-20.6004	-13.5635	-16.3249	-14.7053	-16.3408	-16.2928	-16.9121	-25.5757	-14.7254	-14.6558	-19.7491	-18.864	-15.3085	-22.4512	-16.8172	-15.332	-17.8351	-17.9205	-21.6446	-17.2427	-19.8464	-15.1268	-15.0233	-13.5507	-16.5111	-14.5468	-14.1102	-14.6109	-10.2354	-14.6974	-16.9721	-15.9503	-16.8432	-14.8849	-16.1822	-17.66	-16.7712	-18.3742	-20.9651
472.5	686.5	11.1517	4.5627	-15.2341	-13.8967	-15.311	-15.1276	-14.3878	-14.5225	-16.739	-17.9868	-15.0213	-14.9083	-17.2729	-15.0293	-16.1437	-18.257	-19.4306	-15.0894	-17.883	-18.7881	-17.9197	-16.6699	-19.9847	-16.0346	-15.3643	-22.3837	-18.8477	-18.2428	-19.3839	-19.2971	-18.9879	-16.6078	-14.2938	-17.0608	-15.7779	-10.6967	-13.3902	-10.8007	-16.8263	-16.0442	-17.4441	-19.4101	-15.8464	-22.765	-19.2314	-17.3687	-18.4042	-19.6721
469.5	687.5	11.1514	4.56261	-16.1964	-15.7916	-14.0849	-14.4479	-14.4447	-15.9534	-14.8243	-16.9829	-16.5715	-17.4074	-14.2005	-15.8725	-16.8427	-13.088	-16.3541	-13.7364	-15.2545	-19.2861	-20.3722	-19.0191	-16.6283	-20.2818	-16.5685	-16.9295	-17.7118	-15.2017	-18.2418	-18.35	-16.3088	-12.5393	-16.0985	-11.9573	-16.0287	-14.6703	-13.643	-13.9515	-13.5905	-10.9531	-12.9801	-12.771	-14.0232	-14.3623	-15.8405	-14.4247	-16.4598	-16.8505
470.5	687.5	11.1515	4.56261	-15.5268	-15.485	-14.1405	-13.7948	-14.139	-15.2063	-15.4289	-15.6875	-14.2845	-16.8901	-14.7122	-15.5132	-15.156	-13.4698	-19.4595	-14.0229	-14.3429	-18.446	-18.9811	-16.4775	-17.8442	-16.8592	-14.2968	-15.6503	-16.5785	-17.4639	-16.8936	-18.8708	-14.4289	-14.7173	-16.3405	-13.786	-14.4928	-14.087	-13.3399	-11.9846	-12.6008	-14.718	-13.6583	-13.976	-14.8295	-15.284	-15.2783	-15.7085	-20.1535	-19.4198
471.5	687.5	11.1516	4.56261	-15.1899	-15.0586	-14.3736	-13.6653	-15.8116	-16.6995	-15.9976	-17.4016	-13.0625	-15.6423	-15.7073	-16.6498	-12.6302	-15.2362	-24.5079	-15.3023	-14.2957	-16.0049	-16.6743	-13.743	-20.6666	-16.0289	-14.1062	-18.0743	-14.8576	-20.0462	-15.9451	-17.5073	-15.1587	-15.8849	-14.4518	-16.1109	-14.6396	-12.0557	-13.71	-11.2536	-12.8425	-16.042	-14.0973	-15.105	-15.0807	-16.9894	-16.4624	-17.4131	-19.8661	-23.1181
472.5	687.5	11.1517	4.56261	-14.6826	-14.2877	-15.4732	-14.9102	-16.9243	-16.4969	-17.2298	-18.3782	-14.8662	-13.7941	-16.1714	-17.0945	-13.4051	-16.9881	-21.0745	-17.3377	-16.3808	-15.8446	-17.7757	-14.697	-19.1356	-17.6866	-16.8478	-22.5536	-15.5831	-19.0608	-16.1909	-17.2517	-20.1864	-15.0685	-14.8149	-17.2463	-18.1436	-12.3397	-12.9747	-11.5854	-15.3204	-17.7895	-16.105	-18.2001	-16.8746	-19.142	-17.7745	-18.6084	-18.054	-25.0272
470.5	688.5	11.1515	4.56252	-13.6075	-16.4903	-14.5285	-12.9008	-15.5119	-14.8693	-18.6262	-13.2785	-15.2183	-15.4446	-13.4934	-17.264	-15.1726	-13.0142	-17.7954	-14.7885	-13.9566	-17.6214	-17.8594	-14.9959	-17.6919	-17.6178	-13.1115	-16.9736	-17.738	-14.2214	-16.4039	-17.1139	-15.6523	-13.0128	-13.9225	-15.6504	-12.9682	-12.1683	-12.43	-13.6945	-10.4482	-12.8631	-15.4588	-13.4111	-16.3107	-17.0929	-17.2785	-17.5638	-21.5722	-19.6863
471.5	688.5	11.1516	4.56252	-14.635	-16.9035	-14.5387	-13.1093	-16.8959	-17.2276	-17.3962	-15.3126	-14.3848	-15.2485	-13.7274	-16.7832	-12.2799	-13.528	-18.5963	-16.7375	-13.7088	-14.3817	-16.8803	-13.4119	-21.0732	-16.2524	-13.5855	-18.5304	-16.3862	-16.7937	-15.9591	-16.4142	-17.0114	-13.699	-14.2341	-17.1199	-14.3315	-12.7273	-14.1918	-14.0081	-10.4713	-14.4267	-14.9059	-12.981	-18.1238	-16.8369	-17.4335	-18.1695	-18.2877	-20.0691
341.5	749.5	11.1399	4.55719	-10.5881	-17.3445	-19.219	-15.7313	-16.1737	-15.509	-17.4703	-20.2706	-18.2132	-18.9652	-15.8639	-16.7029	-16.9343	-16.3594	-18.0798	-16.9396	-17.1652	-18.2554	-16.2443	-20.4257	-23.5593	-17.7183	-16.8559	-18.2448	-13.4871	-14.9213	-16.347	-13.3917	-16.1556	-17.7269	-19.4952	-14.3379	-19.4844	-12.0364	-19.9942	-15.3711	-17.0966	-15.5853	-14.9611	-15.0265	-17.3905	-13.517	-21.0263	-17.7397	-17.1954	-24.1295
341.5	750.5	11.1399	4.5571	-13.6397	-17.8031	-21.0097	-15.937	-18.0045	-15.9535	-22.8278	-17.9032	-20.4879	-19.7776	-14.156	-16.8013	-15.4025	-17.3662	-18.5895	-17.4022	-19.5588	-18.739	-14.9382	-22.9507	-24.4813	-18.1707	-18.3926	-16.4785	-14.639	-16.2052	-15.0889	-13.594	-16.6761	-15.7266	-20.5604	-14.9106	-20.1105	-13.7798	-21.6941	-15.242	-17.8029	-17.3928	-17.4463	-14.0681	-19.701	-16.1851	-20.9112	-15.7569	-15.101	-22.0895
342.5	750.5	11.14	4.5571	-14.2579	-17.4416	-22.2222	-16.6136	-15.7979	-14.1775	-22.7657	-17.4137	-22.7357	-19.2518	-15.5865	-18.0531	-15.367	-21.2186	-20.1985	-17.6777	-17.5531	-19.0273	-17.1819	-20.1377	-23.6838	-16.7081	-19.7306	-18.4829	-13.5451	-14.2463	-13.6111	-13.2376	-18.186	-15.2282	-17.6096	-15.3288	-18.4247	-16.2643	-19.7776	-14.2921	-15.4646	-15.9933	-14.6083	-15.5799	-19.6331	-17.0374	-18.9984	-13.453	-17.3688	-20.7844
343.5	750.5	11.1401	4.5571	-14.4893	-17.7072	-20.0889	-16.6725	-14.4737	-13.606	-23.0728	-16.831	-20.9186	-19.2542	-14.2104	-18.8332	-16.6929	-22.2018	-18.8842	-17.2804	-17.5636	-19.0972	-15.8692	-17.9483	-23.3788	-17.0969	-17.5161	-18.003	-13.6578	-13.8321	-14.8709	-15.6275	-16.258	-14.2847	-17.8541	-16.2429	-16.764	-14.9093	-17.921	-15.9119	-14.6248	-14.0836	-13.6625	-14.5717	-18.8129	-19.9983	-16.6231	-14.606	-18.2533	-18.8151
344.5	750.5	11.1402	4.5571	-12.9688	-17.2336	-17.7081	-16.4122	-14.5552	-13.5595	-21.5261	-16.7777	-19.2166	-19.6944	-13.9395	-19.4791	-17.5715	-18.4946	-18.5939	-17.6708	-18.1945	-19.3472	-16.2751	-17.1042	-23.8341	-19.8089	-16.7337	-17.9362	-15.8341	-16.2161	-17.6284	-18.7992	-14.2164	-13.6917	-17.3	-15.3416	-16.1281	-14.3246	-16.5772	-20.3773	-15.7391	-13.2396	-16.1723	-13.9813	-18.7617	-21.2128	-16.5839	-19.6685	-14.4617	-18.859
345.5	750.5	11.1403	4.5571	-12.0367	-16.3496	-16.2237	-17.2043	-15.2225	-14.9442	-21.3189	-17.4937	-19.2547	-18.4576	-14.4909	-20.1267	-16.9814	-16.7044	-19.6343	-17.5088	-17.7198	-20.0282	-19.7979	-17.0532	-22.2804	-22.9178	-16.3108	-18.9013	-17.5287	-18.646	-18.4705	-20.066	-13.961	-13.4997	-16.913	-15.084	-16.1223	-14.6847	-14.9949	-18.754	-15.5169	-13.5252	-21.5147	-15.3536	-20.0838	-20.0813	-18.7266	-23.0014	-15.0251	-16.91
341.5	751.5	11.1399	4.55701	-14.6185	-17.3918	-21.8061	-18.2579	-16.3338	-17.4005	-27.4294	-17.2153	-17.9045	-19.789	-15.1032	-16.4336	-14.0376	-16.8794	-18.5453	-18.9534	-19.8068	-17.499	-14.4081	-22.1183	-23.1351	-19.7888	-19.8177	-18.4434	-16.8804	-16.9327	-15.5533	-14.7621	-18.4332	-16.5537	-19.7463	-17.0583	-21.823	-17.851	-18.0914	-13.8231	-18.4899	-16.5539	-19.2282	-13.9591	-19.4536	-17.8337	-20.269	-14.1769	-13.8694	-16.8981
342.5	751.5	11.14	4.55701	-13.8849	-17.4984	-23.9452	-17.6535	-15.0326	-15.9562	-30.4362	-17.1869	-18.6001	-17.5357	-15.6597	-17.3025	-14.5587	-17.8148	-19.0339	-18.2364	-18.0536	-17.3209	-16.9674	-20.546	-20.6908	-20.0211	-17.1839	-19.8278	-15.5107	-15.3557	-15.0797	-15.7586	-18.1493	-14.8402	-17.9496	-16.2543	-17.9759	-17.0905	-15.7859	-13.2296	-14.3248	-13.4453	-15.9032	-15.131	-18.7174	-18.358	-18.8657	-12.3344	-16.2177	-18.1955
343.5	751.5	11.1401	4.55701	-12.3776	-18.6373	-20.1295	-17.085	-15.1241	-15.4589	-29.8322	-17.5993	-16.6329	-16.4063	-15.0507	-19.034	-17.119	-18.9443	-18.2796	-18.5255	-17.78	-18.3451	-15.9821	-17.8743	-23.2017	-23.3174	-15.2989	-18.7263	-15.6472	-14.5446	-15.5198	-17.5005	-16.7775	-14.2888	-16.2217	-14.4632	-15.1043	-16.9831	-14.526	-16.169	-13.8081	-13.0781	-15.1496	-14.9841	-19.4091	-18.0245	-17.3518	-13.1894	-17.8909	-17.8506
344.5	751.5	11.1402	4.55701	-10.0453	-17.1677	-17.6052	-17.167	-15.5533	-15.6829	-24.4738	-18.132	-16.5822	-16.1199	-15.9346	-20.6074	-17.8894	-18.8352	-19.0633	-18.6503	-18.4244	-19.4927	-16.024	-17.5834	-25.0361	-24.678	-15.9551	-18.4098	-15.9189	-15.5533	-16.3841	-19.2853	-14.6487	-14.2231	-15.5774	-13.4909	-13.5121	-16.9372	-13.7388	-19.4857	-15.6753	-13.3591	-17.7363	-15.3245	-20.4507	-15.8066	-17.1971	-15.932	-14.9607	-17.4991
345.5	751.5	11.1403	4.55701	-9.33254	-15.7092	-15.8728	-17.9459	-14.8266	-16.1365	-21.1357	-19.6352	-19.5938	-16.1429	-16.9828	-20.3295	-16.7333	-17.3808	-18.6349	-18.0836	-18.2966	-20.6486	-19.8206	-17.9671	-23.8924	-24.5417	-17.0113	-18.9483	-16.6519	-15.8121	-17.9987	-20.3204	-13.5407	-15.0704	-16.6937	-14.249	-14.2276	-14.2435	-13.7631	-17.0372	-15.8797	-14.4889	-22.7914	-16.4873	-22.9921	-16.2159	-17.6547	-17.3204	-16.642	-16.1416
346.5	751.5	11.1404	4.55701	-12.8674	-16.1877	-16.013	-17.2657	-14.3479	-15.4666	-19.7463	-23.0913	-19.5176	-18.8134	-16.1395	-19.6145	-16.944	-16.4306	-18.3057	-17.7172	-17.3734	-21.9993	-24.1109	-18.2046	-23.6522	-23.1118	-17.0251	-19.08	-18.8027	-17.7015	-18.1918	-17.8317	-15.3489	-16.2648	-20.9545	-16.7317	-16.7597	-12.3652	-14.8077	-16.4546	-13.8779	-14.9006	-23.2122	-17.5737	-24.2165	-20.0589	-17.7292	-19.3508	-19.2151	-17.1494
347.5	751.5	11.1405	4.55701	-13.2736	-17.3857	-17.6609	-16.4158	-15.0831	-14.7501	-19.1886	-27.2023	-19.3798	-23.2617	-17.07	-18.1224	-19.0231	-17.0272	-21.3339	-19.099	-18.1303	-23.094	-20.3636	-18.3188	-23.0085	-20.1093	-16.3579	-18.4094	-19.085	-19.2795	-17.2285	-16.904	-18.5471	-16.3154	-26.6032	-18.7367	-18.4199	-12.6375	-15.141	-15.051	-12.5556	-13.8345	-23.0976	-20.8753	-24.2295	-25.6478	-17.1233	-22.7564	-20.3933	-19.0452
348.5	751.5	11.1406	4.55701	-12.1382	-18.3704	-18.3909	-16.1737	-14.8389	-15.5451	-19.1622	-23.9481	-20.9231	-20.9258	-17.1625	-16.2699	-19.308	-18.6486	-19.8525	-21.2415	-20.9559	-22.378	-16.7192	-18.1788	-21.8286	-18.7522	-18.8912	-18.6546	-16.8605	-20.9961	-17.3849	-15.2993	-18.9388	-15.0991	-24.1711	-16.2139	-17.4016	-15.8169	-16.2462	-13.6372	-13.0569	-14.1387	-20.2946	-22.9994	-23.8614	-22.9146	-17.4709	-21.1486	-22.8172	-22.3285
349.5	751.5	11.1407	4.55701	-12.3115	-18.4805	-16.4716	-15.1486	-14.4748	-17.4086	-20.1959	-20.9971	-18.2614	-17.7984	-16.5126	-16.5683	-17.512	-18.66	-19.4023	-21.7884	-19.8473	-20.3229	-16.5117	-16.8567	-20.4787	-18.354	-20.3244	-19.622	-17.0915	-19.7167	-15.5346	-15.4188	-16.5124	-15.5716	-17.2447	-14.4554	-17.1256	-18.8097	-20.294	-13.2858	-14.931	-15.2361	-16.1637	-18.9561	-23.9431	-20.5682	-18.6842	-18.1408	-21.5886	-21.3379
341.5	752.5	11.1399	4.55692	-14.2643	-18.6231	-19.481	-19.4075	-17.0462	-17.3476	-22.1587	-18.7907	-16.0618	-19.7465	-18.2943	-15.3261	-14.1474	-15.3647	-14.9877	-17.4603	-19.8988	-16.9371	-14.5823	-20.3933	-22.7004	-22.3126	-21.4685	-18.3704	-15.4544	-18.2997	-14.7648	-15.9117	-17.4314	-16.6578	-21.2367	-17.9376	-21.8923	-15.1282	-16.9901	-12.4897	-20.2979	-14.9728	-17.6377	-16.1781	-19.3825	-17.5803	-21.2338	-15.6255	-11.8304	-12.1293
342.5	752.5	11.14	4.55692	-13.1801	-18.1078	-21.8657	-17.1779	-16.0956	-16.3895	-22.1411	-18.7225	-15.4983	-16.5844	-17.5429	-15.8248	-14.4404	-14.325	-14.6325	-17.6379	-18.4253	-17.6287	-17.4147	-20.1738	-22.7362	-25.528	-16.7419	-19.2651	-14.6716	-14.9444	-13.729	-18.0781	-17.3766	-14.0481	-17.6092	-16.9723	-19.2912	-15.3801	-13.3119	-12.0122	-16.5306	-12.3124	-16.2877	-16.9148	-17.0252	-16.7582	-21.9604	-14.3181	-14.233	-16.252
343.5	752.5	11.1401	4.55692	-12.289	-19.6701	-20.1514	-16.6861	-16.8706	-17.2541	-22.0208	-19.6172	-14.1377	-14.9683	-17.5298	-17.4068	-17.0299	-15.2151	-15.5384	-19.1726	-19.3734	-19.9564	-17.2888	-18.1017	-25.0253	-29.489	-15.2823	-18.9024	-16.1683	-13.4391	-14.5566	-20.6985	-18.6956	-13.0586	-14.6567	-15.0234	-17.2365	-16.8075	-12.0031	-15.0584	-15.9793	-13.829	-16.5843	-17.2644	-17.2988	-16.4574	-18.9829	-14.2474	-16.8069	-18.1348
344.5	752.5	11.1402	4.55692	-10.5338	-19.9528	-19.5261	-16.9563	-16.7841	-19.3446	-20.9482	-20.7349	-14.6676	-15.1312	-18.6991	-20.3288	-17.9803	-17.3752	-18.0152	-18.9918	-21.7218	-20.9837	-16.8711	-18.94	-23.3132	-29.4154	-16.5739	-19.1255	-15.5135	-13.2639	-14.6056	-24.2721	-17.941	-14.223	-14.7986	-14.2575	-16.0015	-15.9889	-12.4086	-15.4914	-17.069	-14.4537	-18.8509	-19.6702	-17.8291	-15.7397	-18.3886	-14.3639	-15.8374	-17.418
345.5	752.5	11.1403	4.55692	-10.0156	-19.1853	-18.7428	-16.3674	-14.2139	-19.1074	-19.3113	-21.3493	-17.1553	-16.0984	-19.1517	-19.5946	-16.0053	-17.7573	-16.9074	-20.4776	-21.1963	-21.2895	-21.3144	-19.4698	-20.2998	-27.3595	-18.3909	-19.8431	-16.5111	-14.6415	-16.3945	-19.7178	-15.4403	-18.1073	-15.7958	-14.5258	-15.608	-13.028	-13.4409	-14.3741	-16.5455	-16.0815	-20.5143	-20.1583	-19.8721	-15.9385	-18.9431	-14.417	-17.1703	-16.9299
346.5	752.5	11.1404	4.55692	-13.0443	-18.2376	-18.5119	-15.4296	-13.0924	-16.2102	-17.5502	-21.248	-17.6066	-20.0186	-17.378	-18.5955	-15.3995	-17.4866	-17.1666	-21.5051	-20.2959	-21.2825	-20.5298	-17.0666	-19.0452	-25.9548	-19.1415	-19.155	-18.1289	-16.7571	-16.7448	-16.163	-16.6596	-20.7711	-17.5798	-14.6601	-17.0577	-12.3599	-15.8083	-15.7734	-14.2732	-17.3472	-19.8861	-19.8399	-20.8815	-18.9316	-19.3958	-17.5118	-19.8641	-18.517
347.5	752.5	11.1405	4.55692	-12.8682	-17.9194	-19.4242	-15.485	-14.2207	-16.2704	-18.298	-20.9789	-18.3449	-23.9584	-16.9818	-18.3664	-17.0362	-18.2855	-21.3952	-22.2137	-22.8037	-19.3728	-17.9748	-18.0431	-20.3463	-21.7042	-18.5378	-15.9204	-18.1706	-17.3268	-15.217	-15.8731	-20.81	-16.2712	-19.5533	-14.3352	-17.6157	-14.8637	-18.4085	-15.4393	-13.5424	-16.0474	-21.3494	-20.4522	-26.8528	-22.7309	-17.7388	-20.0715	-23.6777	-21.1018
348.5	752.5	11.1406	4.55692	-11.3023	-18.3492	-20.1635	-15.9854	-13.6141	-18.3035	-20.9122	-19.947	-21.0459	-19.9679	-16.4628	-19.5639	-17.0306	-19.8775	-25.5939	-22.1666	-22.5327	-17.9524	-16.7838	-19.5259	-20.9049	-21.0023	-17.4405	-14.9684	-17.878	-18.7933	-14.7903	-16.025	-22.4797	-13.226	-19.0366	-14.2376	-15.9412	-18.5807	-18.3925	-13.7725	-14.5793	-14.7974	-24.7643	-18.7808	-26.104	-21.6009	-18.4499	-18.3843	-24.2395	-24.0571
349.5	752.5	11.1406	4.55692	-10.6645	-17.8754	-16.4852	-15.3023	-13.4358	-20.0915	-21.2949	-18.6994	-18.4964	-16.6995	-18.042	-21.0709	-15.5399	-21.0027	-20.8352	-22.5248	-19.0796	-16.4225	-17.4171	-18.4119	-21.9954	-20.4869	-15.5775	-18.9326	-17.6794	-18.5422	-14.4473	-17.6287	-19.0038	-13.595	-16.7915	-13.6396	-16.0781	-15.6037	-19.6787	-13.6591	-16.4203	-14.6804	-18.2625	-15.7728	-25.09	-21.0884	-19.2259	-19.0405	-22.0547	-20.962
350.5	752.5	11.1407	4.55692	-11.8814	-16.0731	-13.0808	-14.04	-15.8794	-22.3976	-23.5427	-19.2654	-18.001	-15.1974	-21.1203	-19.3598	-17.0156	-19.0821	-16.2932	-21.6159	-17.9196	-17.1456	-18.5688	-18.0568	-21.7065	-21.0321	-15.5313	-18.9886	-21.2848	-17.9198	-14.5329	-21.6771	-17.6605	-14.2337	-15.3874	-15.4301	-15.8846	-15.0802	-18.9703	-14.4819	-17.8635	-15.8163	-16.6278	-14.1727	-23.1727	-22.0163	-19.3654	-23.7608	-22.1872	-18.6714
341.5	753.5	11.1399	4.55684	-14.8985	-18.0325	-18.7304	-17.9797	-21.241	-16.0067	-20.4435	-26.6881	-14.3049	-20.119	-19.7239	-15.4902	-13.762	-15.3779	-11.4659	-14.1285	-20.8564	-17.4606	-16.0616	-22.9184	-21.278	-23.4968	-21.505	-14.6565	-13.7733	-18.154	-12.8501	-17.7686	-15.314	-15.0785	-20.5797	-17.6174	-22.1168	-12.7662	-17.0646	-12.7446	-19.339	-15.0348	-15.7158	-18.7797	-19.8455	-20.7484	-18.894	-19.9175	-11.796	-9.5809
342.5	753.5	11.14	4.55683	-14.0728	-17.3917	-22.4308	-16.3783	-19.783	-14.9279	-19.8177	-24.9189	-14.4161	-16.1296	-18.6487	-16.9437	-13.6769	-14.2365	-11.6882	-14.9255	-18.0163	-18.049	-18.2418	-23.337	-23.6947	-25.9216	-19.1333	-15.8493	-11.7876	-13.8599	-11.0493	-20.2958	-16.4436	-13.3163	-16.3384	-16.3679	-18.477	-13.6679	-12.9768	-12.2981	-18.8118	-12.8872	-15.1344	-17.8654	-16.0811	-16.4053	-18.8133	-16.2728	-13.6772	-14.1292
343.5	753.5	11.1401	4.55683	-13.8415	-19.1519	-20.3467	-16.8372	-18.6832	-15.4812	-19.952	-21.5791	-14.1135	-14.8709	-17.3992	-17.2764	-15.4105	-15.1191	-13.8104	-20.0362	-17.2068	-18.6626	-17.2749	-18.4854	-24.0868	-25.1329	-17.4082	-16.7984	-13.3315	-12.8927	-11.9761	-23.1491	-20.7625	-11.6786	-14.8185	-15.8877	-17.8138	-15.5785	-12.6888	-14.6478	-18.5802	-15.2559	-16.6508	-19.1891	-15.5473	-17.0257	-18.4351	-15.6811	-16.9107	-18.8248
344.5	753.5	11.1402	4.55683	-13.7026	-21.5446	-20.096	-17.5046	-15.336	-17.9684	-20.2711	-22.1025	-15.352	-16.1156	-16.8226	-16.8608	-17.2812	-17.6083	-16.3001	-20.3323	-20.3886	-18.8542	-17.2705	-19.3199	-21.5104	-27.0556	-16.957	-18.2675	-15.0854	-13.2764	-13.4543	-23.9247	-19.0298	-13.7088	-14.8164	-16.3034	-18.2714	-14.3652	-14.255	-14.4378	-17.4362	-15.4556	-18.8635	-20.3366	-16.6412	-18.347	-19.4915	-17.373	-16.759	-19.0547
345.5	753.5	11.1403	4.55683	-14.8695	-21.2336	-19.4466	-16.1296	-12.9278	-22.7069	-19.8629	-18.7296	-17.8374	-16.6086	-16.7899	-17.7096	-15.5382	-18.2422	-16.5747	-20.6288	-22.6474	-21.6063	-19.5079	-20.9766	-19.8334	-26.4409	-17.6757	-18.4689	-16.9971	-15.469	-16.3061	-17.8952	-14.8402	-18.1371	-15.2069	-14.7553	-15.8364	-12.982	-14.5805	-14.9428	-16.4547	-17.9292	-18.5676	-18.533	-17.545	-18.3153	-20.2108	-18.9382	-16.6097	-20.463
346.5	753.5	11.1404	4.55683	-15.0425	-18.6841	-19.7365	-15.8668	-13.0628	-23.5009	-18.7517	-16.3462	-16.6675	-18.4559	-16.8341	-18.846	-14.9605	-18.2785	-17.3012	-21.0876	-21.9368	-22.4511	-18.6616	-18.0966	-19.4721	-22.2146	-18.1472	-18.2796	-16.9319	-16.2428	-16.4574	-15.9061	-15.9349	-19.4989	-16.3822	-12.8343	-15.4202	-14.9856	-16.8767	-17.6328	-13.8009	-20.0276	-18.365	-18.7828	-19.5699	-18.9677	-20.4919	-20.3421	-18.9519	-22.2699
347.5	753.5	11.1405	4.55683	-13.1955	-16.9524	-20.3176	-16.9165	-14.3383	-21.9837	-21.0189	-17.9811	-17.5984	-21.2409	-16.0361	-18.8056	-18.3453	-18.8235	-19.7682	-21.8945	-22.6793	-20.1771	-17.16	-17.2757	-20.1089	-19.4556	-18.0495	-16.4504	-17.8909	-16.7298	-14.0504	-16.6243	-19.758	-14.5744	-16.8548	-12.4834	-16.1966	-16.1288	-18.6707	-15.7766	-12.9057	-18.5005	-19.8973	-19.0279	-29.6786	-20.5511	-18.9246	-19.173	-25.0225	-22.6359
348.5	753.5	11.1406	4.55683	-11.7827	-17.854	-19.9762	-16.9064	-13.1264	-20.5224	-23.5458	-19.1818	-21.3383	-20.3803	-15.8906	-19.044	-18.5134	-20.9522	-20.0418	-23.6142	-22.6541	-19.5322	-17.4716	-19.5291	-20.0884	-19.3001	-15.4204	-15.601	-20.2051	-17.6999	-13.1996	-18.7217	-25.1577	-11.9513	-16.2473	-13.2726	-15.2836	-14.1397	-17.8854	-13.5412	-15.0325	-15.3563	-22.4634	-17.3926	-25.5039	-22.243	-19.3437	-17.9704	-23.2071	-24.2896
349.5	753.5	11.1406	4.55683	-10.9011	-18.4048	-17.9485	-15.5305	-12.5863	-19.2201	-23.3775	-18.742	-20.9648	-17.3762	-16.3862	-20.0169	-16.083	-22.3388	-16.5574	-24.8137	-21.7805	-17.6598	-20.2579	-21.44	-22.4331	-20.3775	-13.8203	-19.5796	-20.5336	-17.3416	-14.2524	-23.3469	-23.3816	-11.8875	-15.9116	-13.4496	-14.5887	-14.0119	-18.8334	-13.3681	-17.0825	-14.11	-22.7629	-14.6804	-24.4987	-22.8439	-20.3652	-19.0539	-20.6753	-24.3165
350.5	753.5	11.1407	4.55683	-11.9149	-16.0373	-15.5185	-14.9682	-13.5663	-19.4491	-26.9618	-19.5287	-24.0229	-15.4957	-15.8995	-18.9801	-18.706	-20.2889	-15.3715	-21.5237	-21.7271	-18.1316	-21.2981	-20.5836	-23.5301	-20.7279	-14.7348	-19.2528	-21.9817	-17.7428	-15.6868	-23.4398	-21.6803	-13.0977	-14.5511	-15.3006	-13.8632	-15.4807	-19.1566	-14.4328	-17.2148	-13.7532	-19.4531	-14.483	-24.476	-19.7007	-20.5911	-20.3311	-22.1884	-23.3169
341.5	754.5	11.1399	4.55675	-14.1181	-18.1682	-20.6388	-19.3029	-17.5617	-17.9078	-19.1377	-21.4118	-14.287	-17.2003	-17.8952	-15.6278	-12.8584	-15.5741	-9.85087	-12.9439	-18.3618	-18.9945	-16.0506	-25.1782	-19.9041	-20.065	-18.2265	-12.875	-13.1981	-16.1857	-12.8923	-18.1565	-16.611	-16.3672	-17.5553	-17.1222	-21.5497	-11.4858	-15.9628	-15.0455	-18.1642	-16.6279	-14.9854	-17.1746	-16.0218	-22.4645	-16.0458	-16.3402	-13.5581	-9.03328
342.5	754.5	11.14	4.55674	-14.3064	-17.6001	-21.2325	-17.036	-20.7045	-15.1041	-19.2206	-18.7718	-14.9048	-15.528	-17.5432	-15.6843	-12.9745	-16.1832	-10.9624	-14.077	-16.7437	-19.7475	-16.8213	-27.7939	-22.8947	-18.9536	-18.0923	-13.9289	-11.181	-13.6941	-11.1056	-21.6778	-16.8317	-15.2461	-14.8398	-18.4472	-17.6235	-13.4025	-14.9639	-15.1883	-17.9824	-14.7901	-13.8678	-16.0876	-14.711	-17.9865	-15.856	-13.5716	-16.6483	-12.0176
343.5	754.5	11.1401	4.55674	-13.7976	-18.9685	-19.0592	-16.7732	-18.9731	-14.0205	-21.1125	-19.5526	-16.0962	-15.1967	-16.3453	-14.9979	-14.4823	-19.9813	-13.788	-17.9556	-16.4329	-17.7614	-16.0756	-21.0213	-23.4217	-20.1469	-17.445	-16.9438	-12.764	-13.8057	-11.3544	-22.6998	-19.5284	-13.6315	-14.6621	-20.5354	-16.7218	-15.0336	-16.9068	-16.4818	-16.1223	-15.4772	-15.5886	-16.2997	-15.344	-17.9941	-17.402	-15.7019	-19.4014	-18.5488
344.5	754.5	11.1402	4.55674	-15.0775	-21.6415	-19.2422	-17.3876	-14.679	-15.3687	-20.5429	-23.7714	-18.9794	-16.6942	-15.2162	-15.2899	-15.9823	-20.3759	-16.2519	-19.6727	-17.7836	-18.1684	-17.2405	-19.4979	-21.7435	-26.4559	-17.5028	-19.1263	-15.453	-15.0587	-12.9364	-21.0456	-17.77	-13.1386	-16.0433	-20.4834	-16.2235	-13.8494	-18.8649	-14.8594	-15.9463	-15.12	-17.9722	-14.6199	-17.0965	-19.0129	-17.9973	-22.4234	-19.6761	-20.9777
345.5	754.5	11.1403	4.55674	-17.1853	-21.313	-18.9612	-17.2704	-12.3488	-18.3226	-19.1566	-19.1313	-19.7235	-16.6067	-14.0619	-17.4824	-14.6939	-19.645	-17.0729	-18.0625	-19.6232	-22.7565	-20.4385	-21.2316	-19.4844	-22.8463	-17.6112	-18.0533	-18.5939	-15.9931	-15.9913	-17.8672	-14.996	-13.1933	-16.8915	-16.3275	-14.4811	-14.8098	-14.8168	-15.7457	-15.7181	-17.711	-19.1804	-14.9724	-17.0898	-19.6333	-17.5491	-23.8902	-17.1203	-19.5095
346.5	754.5	11.1404	4.55674	-15.2773	-18.9875	-19.7924	-17.3361	-12.2734	-20.9955	-21.0614	-17.202	-16.0088	-16.8101	-13.8335	-20.4352	-14.5719	-19.9786	-17.5369	-18.7499	-19.9594	-25.3573	-20.7415	-23.1122	-21.023	-19.3844	-17.0635	-18.3975	-17.6006	-15.4673	-15.9856	-17.0289	-15.6116	-13.0587	-17.4241	-13.7376	-14.181	-16.2718	-14.5889	-18.5681	-13.4592	-18.6693	-20.4231	-17.7262	-19.2273	-18.561	-18.0838	-20.2337	-18.6478	-19.7775
347.5	754.5	11.1405	4.55674	-13.7242	-17.2482	-19.6603	-18.9331	-14.3621	-19.2353	-23.4981	-18.8752	-16.7636	-19.7707	-13.7632	-19.086	-18.7979	-19.4908	-17.8958	-20.7288	-19.6332	-22.9135	-19.4324	-20.1817	-20.2004	-18.3278	-15.5473	-19.8211	-19.6935	-16.4312	-13.5742	-17.3017	-19.2157	-11.6842	-16.2721	-14.1008	-14.7743	-14.4231	-14.0875	-15.4836	-13.5757	-18.4243	-20.2705	-18.4837	-22.8473	-19.9475	-17.9648	-18.5314	-23.6204	-19.392
348.5	754.5	11.1406	4.55674	-12.5034	-18.3761	-18.8319	-18.7793	-14.046	-17.0666	-19.5672	-19.6678	-19.6259	-22.5401	-14.3843	-16.3925	-20.8134	-21.1027	-17.2702	-22.4695	-20.3318	-20.8001	-20.4209	-20.4977	-18.9526	-20.3544	-14.2675	-19.7466	-20.8972	-17.3816	-12.9426	-17.4543	-22.711	-10.6907	-14.8802	-14.0105	-14.8188	-13.4712	-14.9318	-13.1043	-16.3621	-16.1202	-21.0227	-16.8436	-22.559	-21.274	-19.5083	-18.1356	-19.5999	-20.0638
349.5	754.5	11.1406	4.55674	-11.8441	-20.3538	-19.5264	-16.6491	-13.5498	-16.9693	-20.9948	-19.4202	-18.9645	-19.2593	-14.6366	-17.8675	-18.2777	-20.1977	-15.3005	-22.037	-23.5339	-22.1061	-21.3145	-24.3018	-21.4208	-23.5492	-15.1137	-19.5125	-19.4502	-17.7107	-15.33	-18.1294	-21.2077	-11.7548	-14.6514	-13.6786	-13.9543	-14.0396	-17.3127	-12.6801	-16.938	-14.2567	-23.1504	-15.711	-22.5058	-20.3202	-21.6189	-19.395	-18.6342	-20.982
350.5	754.5	11.1407	4.55674	-12.6042	-19.0777	-18.0168	-17.4831	-14.3448	-18.872	-22.6993	-18.8932	-18.377	-17.7307	-13.8836	-18.869	-19.7185	-18.727	-15.456	-21.1165	-23.6717	-23.3127	-20.5636	-23.6054	-23.3251	-20.2086	-16.4141	-18.7911	-18.9236	-17.2162	-17.9297	-19.1593	-19.4927	-14.6079	-14.98	-15.1021	-12.7843	-14.6479	-18.358	-13.7167	-16.1495	-13.2818	-20.1457	-17.0898	-23.4182	-17.9375	-19.8558	-21.0286	-19.0573	-26.0145
341.5	755.5	11.1399	4.55666	-14.9362	-18.3462	-21.7535	-19.6387	-14.3855	-22.4458	-15.9826	-17.5006	-15.4265	-15.3929	-18.4163	-15.3996	-12.8491	-15.4051	-10.537	-14.414	-15.6811	-19.9556	-15.5196	-19.0883	-17.987	-16.5955	-16.5483	-12.6429	-13.8364	-15.0703	-14.1899	-19.7448	-19.4847	-19.1115	-16.6203	-16.1317	-20.5659	-12.9724	-15.4903	-18.0399	-18.0937	-17.2132	-15.7259	-17.2429	-15.0553	-22.3331	-16.4995	-15.1816	-13.739	-9.84248
342.5	755.5	11.14	4.55666	-13.7743	-17.8	-19.4623	-17.3201	-17.3844	-18.0453	-16.9856	-16.7196	-16.9003	-15.4078	-16.5125	-14.2312	-13.2284	-18.4179	-11.9476	-15.1269	-15.5982	-21.7306	-15.5561	-22.8178	-25.1618	-15.615	-15.4693	-13.6184	-13.8812	-14.1007	-12.3495	-18.3251	-20.6875	-17.5952	-14.9915	-20.0442	-18.7635	-14.7814	-17.3394	-19.6831	-15.514	-16.1643	-14.1558	-15.878	-14.3493	-21.2531	-16.2172	-14.0885	-16.015	-11.8188
343.5	755.5	11.1401	4.55665	-12.6972	-18.0562	-17.6067	-15.7247	-19.0177	-15.3391	-19.2986	-19.6406	-19.5518	-15.247	-14.6895	-14.3144	-15	-21.6084	-15.3462	-17.7697	-18.0945	-17.309	-15.447	-21.7368	-24.7355	-17.1314	-14.6708	-15.9457	-15.5048	-15.2309	-12.4834	-17.2529	-18.7352	-15.524	-15.471	-27.6617	-17.9627	-14.6802	-20.6645	-17.9149	-13.3143	-14.2763	-12.8389	-14.459	-15.8184	-17.6881	-16.8222	-16.6099	-15.0655	-19.1256
344.5	755.5	11.1402	4.55665	-13.2451	-19.9967	-17.7803	-16.1496	-15.9035	-15.5168	-18.017	-25.2146	-23.3008	-16.3811	-13.1551	-15.5327	-15.4607	-19.2757	-19.1278	-18.221	-21.5935	-18.0531	-17.3857	-20.5103	-23.8376	-20.1425	-15.2867	-18.7812	-18.1135	-16.3184	-14.3317	-17.3056	-16.765	-12.2563	-17.7999	-20.9463	-16.7041	-14.9079	-17.3392	-13.2428	-15.4111	-13.0187	-13.7055	-13.9629	-16.8259	-16.9876	-16.6408	-19.9534	-18.5079	-23.1683
345.5	755.5	11.1403	4.55665	-13.6357	-19.8039	-19.3057	-18.4781	-14.3659	-16.1194	-16.8342	-20.123	-18.8562	-16.2315	-12.3518	-17.2203	-13.6167	-19.3617	-18.5445	-17.6435	-20.6727	-21.614	-22.7453	-21.9547	-19.3135	-21.8976	-17.2348	-19.5772	-20.8316	-15.6763	-16.4347	-19.622	-16.4811	-10.779	-19.6817	-17.0901	-14.9697	-15.095	-14.0351	-11.7799	-16.0971	-13.8489	-18.2789	-16.5368	-17.2331	-17.1775	-16.3028	-19.2686	-16.6077	-19.29
346.5	755.5	11.1404	4.55665	-13.4068	-21.9465	-20.0958	-16.9764	-14.7292	-15.6704	-20.538	-18.4014	-15.3689	-17.2769	-12.0117	-19.76	-12.892	-20.4309	-17.2483	-19.2778	-20.0538	-24.6681	-24.57	-23.9324	-19.0726	-20.9397	-17.9516	-20.1037	-21.1447	-15.1125	-15.7017	-18.5147	-18.1651	-10.6806	-18.2514	-15.4078	-14.4564	-13.7634	-12.6365	-12.9935	-13.4895	-16.3815	-20.8397	-20.9002	-18.3289	-18.1252	-16.8616	-18.353	-15.9546	-17.2772
347.5	755.5	11.1405	4.55665	-13.5452	-20.4934	-17.9766	-17.7479	-15.8343	-15.5061	-23.6121	-19.4959	-15.5088	-20.0325	-12.3254	-19.0397	-14.7486	-19.5551	-17.1323	-21.036	-19.1305	-22.5442	-22.5106	-23.3996	-19.0566	-21.2359	-16.8203	-22.7741	-21.6741	-15.1381	-14.5382	-15.8396	-19.6715	-10.3284	-15.5416	-15.0326	-14.3725	-12.991	-12.1803	-13.5159	-14.016	-18.6213	-17.3196	-18.5012	-18.7742	-19.7753	-18.2291	-18.3302	-19.0516	-17.6089
348.5	755.5	11.1406	4.55665	-11.9334	-18.7726	-18.0926	-19.1804	-15.5902	-15.5152	-18.4559	-19.1126	-17.2347	-21.2105	-12.8972	-16.5999	-16.4679	-20.7686	-17.4033	-22.8959	-19.5065	-20.2994	-21.6796	-22.3052	-18.942	-24.5394	-16.4475	-21.114	-20.0421	-15.4293	-13.0988	-15.5181	-18.6564	-9.51234	-13.9398	-14.1272	-14.1621	-12.2566	-12.9321	-12.3579	-16.3634	-17.9445	-16.5705	-17.5017	-19.3	-21.1436	-21.0725	-18.7745	-19.402	-18.9298
349.5	755.5	11.1406	4.55665	-11.2543	-18.2359	-19.6704	-17.9769	-15.6011	-17.4403	-20.3432	-18.6084	-16.9289	-18.5534	-14.0182	-19.5454	-16.9401	-19.9692	-17.2904	-18.6789	-22.5769	-21.6807	-19.5879	-22.1075	-20.9661	-25.3673	-18.5672	-18.9277	-17.1043	-16.2264	-14.5296	-15.8749	-16.1632	-11.905	-13.881	-13.4257	-13.8464	-12.0226	-15.5729	-12.0639	-17.0839	-15.6802	-19.7268	-17.6456	-21.1413	-20.6556	-23.1531	-20.3224	-19.6832	-20.5545
350.5	755.5	11.1407	4.55665	-12.6214	-18.2748	-19.8616	-19.3919	-16.6731	-22.8007	-19.2556	-17.9025	-16.022	-18.506	-15.02	-19.8888	-16.3875	-19.4867	-16.7894	-18.7947	-22.145	-23.8761	-20.1929	-22.0545	-23.2795	-20.0268	-18.0431	-19.5299	-16.4263	-17.3861	-16.8244	-16.4554	-14.9078	-16.4001	-14.8554	-15.0815	-13.1704	-13.9415	-17.2371	-13.4039	-16.4104	-15.42	-20.0249	-19.0436	-21.4847	-18.7023	-18.6049	-22.0263	-20.0853	-19.8168
341.5	756.5	11.1399	4.55657	-14.1863	-17.5424	-20.8537	-18.4521	-16.9208	-18.0032	-15.5583	-16.4222	-16.7769	-13.7223	-18.9751	-17.315	-13.114	-16.1318	-12.9079	-15.4586	-14.9129	-18.5643	-14.5622	-14.901	-15.8057	-14.5065	-16.0885	-13.2519	-15.4023	-14.5396	-13.0884	-15.8808	-20.4438	-17.2806	-16.5946	-15.0872	-16.5434	-14.9477	-15.4722	-17.9735	-18.4364	-16.0139	-15.3352	-17.8025	-14.9372	-16.5062	-17.9113	-16.44	-15.2014	-11.4418
342.5	756.5	11.14	4.55657	-12.3838	-16.2945	-19.4307	-17.0528	-18.5638	-19.3583	-15.835	-16.3667	-18.3194	-14.0883	-15.1678	-14.6254	-13.9523	-18.9568	-14.23	-16.2541	-16.073	-19.439	-16.9016	-16.7244	-18.4356	-14.602	-15.3181	-14.1506	-18.0819	-14.0603	-12.2579	-13.1842	-22.7624	-16.4695	-15.8746	-17.1979	-17.0644	-15.991	-16.5778	-18.6229	-16.0484	-16.144	-13.9367	-17.7907	-14.3757	-18.9505	-16.4153	-17.8861	-14.7865	-13.0157
343.5	756.5	11.1401	4.55656	-11.892	-16.6567	-17.1249	-15.9501	-17.9825	-18.5098	-16.3233	-18.3393	-20.8275	-15.2771	-13.1879	-15.2712	-17.0253	-18.7529	-17.7494	-16.9524	-20.5411	-17.5862	-16.6703	-18.8612	-18.4866	-16.656	-15.7221	-16.0758	-20.7275	-15.0356	-13.7623	-13.0792	-19.5278	-15.474	-16.1437	-16.88	-17.5683	-14.6159	-17.5291	-16.0104	-15.3433	-13.3527	-12.5577	-15.6007	-15.9992	-17.8227	-16.0269	-20.6586	-12.7803	-17.6972
344.5	756.5	11.1402	4.55656	-12.5922	-18.0179	-16.5252	-16.0182	-16.7236	-17.9023	-15.7798	-21.9499	-20.338	-16.4652	-12.4059	-17.4407	-15.8944	-16.5458	-21.0709	-17.3818	-23.3784	-18.6291	-17.2941	-20.6127	-20.4814	-19.3692	-16.6525	-17.8831	-21.5136	-16.0207	-16.7432	-14.4743	-17.1274	-12.3823	-17.7411	-15.1336	-16.59	-13.9419	-16.629	-12.0034	-18.6632	-12.3469	-13.1315	-17.6596	-17.0146	-17.3559	-16.6992	-20.7689	-15.2265	-18.5637
345.5	756.5	11.1403	4.55656	-12.2851	-17.7638	-18.6985	-18.8755	-18.4699	-16.4034	-17.6193	-21.558	-18.4826	-15.3737	-12.5518	-16.8355	-13.943	-16.4975	-18.6069	-20.4103	-21.1104	-22.2787	-20.4353	-23.8467	-20.1451	-21.2801	-17.8134	-19.3563	-20.707	-15.5551	-17.8074	-18.8865	-16.5499	-10.9018	-19.5038	-14.5943	-16.7578	-13.1265	-14.2821	-10.3957	-18.9255	-13.148	-15.9104	-21.2379	-17.5941	-18.7048	-17.0085	-20.2833	-15.9116	-18.4448
346.5	756.5	11.1404	4.55656	-12.4245	-19.6675	-20.7295	-18.6053	-17.588	-15.7229	-21.8593	-20.0222	-15.7692	-17.1565	-13.0499	-18.2881	-13.58	-17.4485	-16.4967	-21.6432	-22.6236	-22.4973	-23.4803	-25.7529	-19.427	-23.6818	-18.4863	-19.5411	-20.7166	-14.9629	-17.3323	-19.198	-17.2271	-11.1646	-17.4715	-14.9062	-16.5937	-13.2332	-13.0595	-10.784	-15.466	-15.4272	-17.5357	-21.9901	-18.637	-21.0919	-17.5518	-21.0715	-14.8352	-17.1757
347.5	756.5	11.1405	4.55656	-13.2564	-21.6218	-18.8773	-17.3804	-15.4274	-16.1768	-21.3995	-19.6091	-14.764	-18.4057	-12.8131	-18.3701	-14.9777	-17.685	-17.478	-20.9576	-20.0679	-21.5358	-21.5867	-21.7667	-20.0602	-21.41	-17.6743	-20.9322	-20.6047	-14.6323	-17.4816	-15.5086	-17.571	-10.9371	-14.3003	-14.345	-15.5881	-12.9901	-13.7636	-12.3181	-14.3909	-17.2628	-14.9469	-19.5561	-18.1969	-20.5671	-19.3771	-21.0351	-16.8797	-17.4126
348.5	756.5	11.1406	4.55656	-11.5867	-18.4154	-18.2283	-17.0153	-16.207	-16.7837	-19.8557	-18.0478	-15.9431	-18.3659	-12.5181	-18.5846	-16.0209	-19.0919	-19.8392	-21.5475	-19.5541	-21.0325	-21.0531	-19.4926	-20.7714	-17.9265	-17.8062	-19.9657	-18.6455	-14.3909	-14.7381	-15.3052	-15.9847	-10.6417	-12.9936	-13.3585	-14.1861	-11.8893	-14.4764	-12.5029	-14.8819	-17.4265	-14.954	-18.253	-18.2497	-18.8541	-24.6969	-20.0257	-20.4526	-19.6297
349.5	756.5	11.1406	4.55656	-11.1252	-16.7698	-19.4244	-17.5396	-16.8375	-18.5003	-23.1998	-16.856	-16.9111	-17.2283	-13.6051	-20.7415	-15.9562	-23.3194	-20.1665	-17.6917	-22.0848	-21.4026	-20.3896	-19.8759	-20.5105	-16.2372	-18.6429	-17.8812	-17.5139	-15.4085	-13.1605	-15.0236	-14.3429	-12.5805	-12.8944	-13.2079	-13.7579	-13.185	-15.43	-13.493	-16.8651	-15.8582	-18.4595	-18.3432	-22.1445	-19.3182	-22.3615	-20.0012	-21.7634	-22.6157
350.5	756.5	11.1407	4.55656	-13.0402	-17.223	-20.9397	-21.0299	-18.9007	-19.9642	-20.5144	-17.0522	-17.321	-16.4885	-16.1958	-19.3728	-14.9468	-24.2208	-18.279	-17.1727	-21.9193	-22.2071	-21.8577	-21.1754	-19.9598	-17.8701	-17.4588	-18.9842	-17.2718	-17.5192	-14.2561	-15.7294	-13.926	-15.1272	-13.2318	-15.4802	-14.4337	-17.4775	-17.4231	-16.025	-17.4385	-16.5691	-19.8013	-19.7659	-21.7407	-19.8846	-17.6069	-21.1962	-22.1293	-21.0195
342.5	757.5	11.14	4.55648	-11.1891	-17.3666	-19.2662	-15.4391	-20.3928	-16.1226	-16.5818	-14.0521	-18.706	-12.5285	-14.5878	-15.8282	-14.0188	-17.7713	-15.5618	-16.2717	-18.2704	-15.678	-19.1073	-16.0823	-16.8645	-14.1421	-15.9028	-14.5061	-18.151	-15.3834	-10.9295	-11.1222	-17.0653	-13.5555	-16.1553	-14.5113	-14.6328	-16.0154	-15.5846	-16.1828	-17.3489	-15.2574	-11.4936	-18.2995	-15.3442	-16.638	-15.553	-17.6234	-14.5371	-14.1232
343.5	757.5	11.1401	4.55647	-11.6253	-17.1261	-18.0865	-17.7533	-17.1574	-18.4172	-15.3542	-16.2246	-18.695	-15.6865	-13.8667	-15.8492	-16.8165	-17.9861	-19.4157	-17.723	-22.9403	-16.4571	-20.2234	-17.5504	-17.4417	-17.1185	-17.4718	-16.2398	-18.2334	-14.5197	-13.9335	-11.5408	-18.2259	-14.2728	-15.4696	-13.0816	-16.7001	-14.7139	-17.8267	-14.464	-21.0252	-13.4403	-11.253	-17.1728	-16.1236	-18.0046	-17.1439	-22.7119	-13.8583	-14.7113
344.5	757.5	11.1402	4.55647	-13.709	-18.1373	-17.2358	-18.0099	-15.7089	-18.5268	-15.2713	-21.3623	-17.5807	-16.2196	-13.8324	-17.8585	-15.7953	-17.1015	-18.5904	-17.9661	-20.7295	-18.6379	-18.4266	-19.1021	-18.6452	-19.9006	-19.7789	-17.7609	-17.4136	-15.0535	-17.3808	-13.7155	-17.2624	-13.3974	-16.5816	-11.6739	-15.6551	-14.8352	-16.9895	-12.2133	-26.8754	-13.7085	-12.4685	-19.6842	-16.971	-18.8057	-18.2296	-22.5732	-15.3837	-14.7306
345.5	757.5	11.1403	4.55647	-14.2641	-17.5105	-19.4951	-18.8289	-18.4569	-16.9708	-20.0471	-25.1591	-17.5507	-15.7881	-13.8495	-20.0241	-15.8458	-15.7543	-16.2237	-25.735	-19.9278	-21.0342	-19.6376	-20.1709	-20.7815	-19.3937	-19.8211	-18.2031	-16.9505	-16.8453	-18.4653	-19.4904	-16.2722	-13.9592	-18.4974	-12.2926	-16.0376	-15.3723	-14.5341	-10.4336	-22.3472	-15.3411	-14.5601	-20.7727	-18.5776	-20.8558	-18.9117	-22.252	-15.8792	-15.7568
346.5	757.5	11.1404	4.55647	-13.9088	-18.0306	-22.0815	-19.4669	-15.1719	-17.3562	-21.4	-24.0664	-16.3127	-18.1497	-13.9586	-20.2174	-16.6711	-16.5283	-15.4411	-21.9883	-24.7691	-19.9167	-23.5786	-20.3289	-22.1128	-20.3554	-19.1675	-16.8126	-18.0371	-17.6447	-18.4314	-21.2982	-17.7993	-13.569	-16.7062	-13.9788	-16.2909	-15.3544	-14.8782	-11.28	-18.4116	-15.7427	-15.9145	-19.5964	-21.2415	-23.8379	-18.3995	-23.7352	-15.6956	-15.8167
347.5	757.5	11.1405	4.55647	-13.8547	-19.1394	-20.2024	-17.1251	-13.688	-18.6681	-19.128	-22.6948	-15.2665	-18.9192	-13.2643	-19.1161	-18.0066	-17.9426	-17.933	-19.919	-21.1338	-19.0174	-21.5297	-18.7534	-22.9077	-17.4305	-18.5501	-18.709	-19.043	-16.2018	-18.15	-18.1306	-17.2508	-12.4869	-14.0878	-12.9413	-15.6289	-14.0715	-17.4751	-13.2419	-16.2728	-13.6665	-14.8841	-19.2331	-19.1553	-19.8472	-18.0502	-24.3418	-17.714	-16.8042
348.5	757.5	11.1406	4.55647	-12.2736	-18.5081	-18.6807	-15.3111	-15.4463	-18.8804	-19.6825	-18.1341	-15.729	-17.8217	-12.7932	-20.1399	-18.948	-17.898	-19.1609	-20.6715	-19.806	-19.6557	-18.9907	-17.6197	-23.319	-14.6277	-16.4866	-22.3114	-18.4608	-15.6773	-16.8213	-17.1198	-15.2792	-12.7129	-13.8751	-11.7458	-14.9899	-13.3462	-17.2007	-14.6453	-14.6544	-13.7092	-17.069	-16.9765	-18.6995	-17.226	-17.1957	-20.1942	-20.1337	-19.565
349.5	757.5	11.1406	4.55647	-12.0343	-17.5898	-18.7924	-15.3935	-15.9207	-18.4785	-19.8847	-16.0741	-16.8746	-16.4971	-14.0647	-21.6706	-17.9449	-19.8076	-17.727	-18.9402	-20.1833	-20.4447	-17.4885	-19.0657	-20.8456	-13.5181	-16.0495	-18.6	-18.2048	-16.4213	-15.2096	-16.1764	-14.448	-13.178	-14.0821	-12.0746	-16.165	-15.0981	-17.4213	-16.5357	-15.6615	-14.2176	-18.7237	-15.4306	-20.3742	-18.2329	-16.9937	-18.8721	-21.9018	-23.0264
345.5	758.5	11.1403	4.55638	-15.6372	-17.0643	-19.7595	-18.1668	-13.7467	-16.3069	-20.1149	-26.3639	-16.4268	-17.4779	-16.4643	-19.8536	-16.5199	-17.6441	-15.957	-21.2657	-18.173	-18.0105	-19.6321	-17.7404	-22.2638	-20.7641	-20.1586	-17.9476	-13.633	-18.6601	-17.2081	-18.3768	-14.5508	-17.3944	-17.7373	-11.781	-13.2941	-15.6319	-14.3658	-11.4542	-18.8173	-15.5243	-13.9727	-14.9606	-18.295	-20.5511	-21.5512	-19.4484	-14.6788	-14.0525
346.5	758.5	11.1404	4.55638	-14.874	-15.8916	-20.1452	-17.9337	-13.188	-17.5129	-19.9867	-21.4145	-15.9725	-21.4092	-15.1319	-21.4205	-17.2226	-17.5554	-15.1546	-18.7836	-22.993	-17.099	-20.9164	-16.8508	-26.2259	-20.4911	-19.8452	-15.8284	-15.5413	-17.7394	-15.9427	-19.8368	-16.445	-16.1793	-17.2434	-13.9939	-13.1863	-16.9547	-15.9292	-12.6861	-18.2814	-14.5014	-17.8814	-15.6338	-20.152	-20.1634	-18.2563	-19.8697	-15.729	-15.7735
347.5	758.5	11.1405	4.55638	-14.5575	-16.6028	-20.5756	-16.7685	-13.5516	-20.4801	-19.1487	-19.313	-15.5231	-21.5507	-13.4575	-20.0571	-15.5047	-19.5461	-17.612	-19.3048	-20.4979	-17.0738	-19.9152	-16.2678	-23.0663	-17.2359	-19.2478	-18.4332	-17.3557	-18.1452	-16.3714	-19.8112	-18.1265	-14.9881	-15.5505	-12.4099	-14.0373	-15.7909	-16.2873	-15.6656	-20.8059	-12.1587	-18.2897	-16.807	-18.4888	-19.5629	-16.8909	-20.3757	-18.0522	-17.2653
348.5	758.5	11.1406	4.55638	-13.2989	-18.8187	-19.7872	-15.5717	-14.3378	-20.1482	-21.1887	-18.4718	-15.8519	-18.3658	-13.0832	-20.0042	-14.5834	-19.0319	-16.3053	-20.5744	-19.3371	-18.0257	-16.5131	-16.1501	-23.3926	-15.0905	-14.9021	-26.7941	-19.3421	-18.6475	-16.2668	-19.1639	-16.4461	-14.1528	-15.9178	-12.0414	-14.7765	-15.67	-16.3906	-16.8788	-20.863	-11.8575	-21.1382	-16.0124	-18.1772	-17.7651	-16.0543	-18.3567	-19.8162	-18.8413
349.5	758.5	11.1406	4.55638	-12.8344	-20.4728	-18.9754	-15.4511	-13.5243	-18.2548	-21.3396	-17.8054	-16.8601	-16.6364	-15.7253	-18.9247	-15.9029	-19.1342	-14.9663	-19.0358	-19.1075	-19.0046	-15.2577	-18.2696	-22.9406	-15.1038	-13.6525	-24.1095	-21.0675	-18.8575	-15.8292	-19.7014	-15.3787	-12.5628	-17.3238	-11.9378	-16.1819	-15.5402	-17.6689	-16.4582	-18.7139	-12.659	-20.1952	-14.8722	-17.8054	-19.1405	-16.0442	-17.3958	-22.4676	-20.1171
349.5	759.5	11.1406	4.55629	-12.7166	-23.5811	-20.0773	-17.6899	-11.6402	-16.8966	-21.2898	-21.3461	-17.6731	-17.7525	-14.5986	-16.8016	-13.4849	-21.1597	-15.4471	-17.3228	-19.1338	-22.469	-17.8288	-20.0533	-23.7586	-16.9186	-13.7884	-19.6093	-20.8949	-20.1352	-15.615	-20.4889	-15.8202	-12.4063	-19.887	-12.7919	-14.1854	-16.3126	-14.7318	-15.2995	-20.297	-12.6155	-17.4968	-15.2649	-17.6336	-18.5995	-17.5036	-17.7051	-18.8883	-19.6145
628.5	801.5	11.1655	4.55224	-13.5319	-17.8426	-18.9677	-18.0707	-12.7081	-17.8245	-17.5018	-19.2406	-16.6083	-13.4632	-11.5266	-14.4202	-12.6753	-16.5552	-16.548	-19.2933	-13.5115	-20.9636	-17.9642	-22.3641	-18.5026	-16.6098	-18.4909	-17.7677	-17.2637	-16.7428	-14.6875	-16.5989	-15.954	-13.6238	-14.7905	-14.6926	-13.464	-10.5401	-17.9343	-19.0672	-12.0605	-14.1822	-15.0253	-12.3162	-15.5214	-17.1962	-17.8677	-18.1588	-15.5233	-15.3178
629.5	801.5	11.1656	4.55224	-15.2515	-20.0084	-18.9477	-16.6686	-16.5818	-18.6141	-18.8794	-19.5746	-15.8747	-14.1326	-13.2384	-13.9123	-12.0074	-15.4404	-14.9394	-19.3833	-14.8863	-18.3379	-16.7804	-21.8316	-20.285	-16.7658	-17.6321	-18.1091	-16.1427	-18.161	-14.4345	-16.8757	-16.7673	-13.6756	-12.8499	-17.6181	-14.6042	-12.5068	-14.6265	-19.4492	-13.1193	-14.447	-13.2856	-10.553	-14.7482	-15.667	-18.2494	-16.8073	-13.9697	-13.1329
627.5	802.5	11.1654	4.55216	-14.5729	-18.5366	-15.8906	-20.489	-10.1203	-16.6542	-19.8933	-18.4503	-14.3627	-17.4412	-11.7974	-14.4618	-13.6577	-15.7443	-17.3857	-15.966	-15.415	-20.8822	-17.7087	-20.6605	-18.2351	-15.3612	-17.4092	-21.347	-22.0562	-16.9803	-12.4551	-15.5937	-15.9054	-15.5447	-15.5171	-14.4478	-13.3783	-11.1236	-17.4135	-15.8732	-13.2714	-13.9358	-18.1883	-15.5899	-15.8031	-18.336	-15.8127	-19.0735	-22.6244	-20.511
628.5	802.5	11.1655	4.55215	-18.7285	-16.8542	-15.1795	-18.5226	-12.7902	-17.1738	-19.3193	-19.3236	-14.9562	-16.6482	-12.0641	-14.5027	-13.4877	-15.0158	-16.8664	-17.4788	-13.8652	-18.9875	-19.1994	-21.2969	-17.3659	-15.1783	-15.6443	-18.3297	-18.8339	-18.3109	-13.0577	-15.2593	-20.4192	-14.8274	-14.9013	-13.5689	-13.3475	-11.9905	-18.0161	-18.6596	-13.2392	-13.4414	-15.5129	-13.362	-15.8886	-17.0052	-15.5494	-19.1237	-19.0101	-17.2261
629.5	802.5	11.1656	4.55215	-17.8276	-18.6265	-15.4399	-16.216	-16.107	-18.8813	-18.9792	-19.3006	-15.908	-16.2716	-13.0159	-13.9488	-12.7384	-13.9734	-15.6176	-18.8567	-14.3648	-15.2899	-18.8025	-20.5206	-17.7418	-14.8032	-16.2644	-18.3161	-16.9464	-19.4333	-13.9012	-16.6599	-20.2714	-14.1802	-13.5553	-15.4515	-13.6535	-14.9132	-16.6113	-19.2756	-14.1482	-15.3267	-13.172	-11.2071	-14.8504	-14.6166	-16.3826	-18.2086	-17.2379	-15.6145
630.5	802.5	11.1657	4.55215	-18.172	-18.3128	-15.5157	-14.5653	-16.6146	-23.1497	-17.7775	-17.7855	-15.9246	-17.8937	-14.0912	-15.4479	-12.3438	-16.4214	-15.2738	-17.0771	-15.6004	-15.2457	-18.9333	-16.6827	-19.081	-15.3804	-16.5893	-20.5877	-16.8041	-20.0435	-14.4062	-18.7548	-16.7591	-15.4217	-13.1552	-19.0425	-14.483	-18.3262	-13.2627	-17.8521	-14.853	-16.3544	-12.1991	-10.9051	-14.3868	-15.3477	-18.4563	-17.7449	-16.6787	-15.6484
631.5	802.5	11.1658	4.55215	-20.5471	-15.5384	-15.1183	-12.801	-15.9809	-19.5291	-17.493	-17.0221	-15.0585	-17.2861	-15.6098	-15.7464	-12.4622	-20.3518	-16.6007	-15.6386	-18.0341	-16.5384	-18.5031	-15.7565	-22.9757	-16.8969	-14.8242	-19.3773	-17.3147	-19.0122	-15.5587	-18.5832	-14.2736	-15.8774	-13.1368	-17.4085	-15.7325	-18.6088	-11.9595	-14.5773	-14.0044	-15.5111	-14.7908	-12.6898	-14.3232	-19.486	-18.0581	-21.0783	-17.2333	-16.0495
632.5	802.5	11.1659	4.55215	-16.9861	-14.0434	-14.8559	-12.1513	-14.8481	-17.742	-19.4347	-17.2129	-15.0568	-14.4536	-16.6026	-13.8994	-13.0587	-19.4868	-18.5809	-16.0972	-19.3359	-15.4939	-18.2338	-17.0993	-21.0177	-17.8586	-15.2057	-18.0184	-17.4856	-17.2435	-17.3372	-18.2496	-14.1784	-16.243	-13.8938	-15.5252	-15.1613	-16.3207	-11.3793	-11.4953	-13.5742	-15.9496	-16.9186	-16.6524	-14.8698	-21.734	-17.7114	-25.252	-18.2705	-16.5953
633.5	802.5	11.1659	4.55215	-13.2674	-13.9517	-14.8691	-13.1297	-14.7759	-16.1981	-17.4082	-17.4136	-14.8622	-13.0104	-16.165	-12.2566	-12.6601	-17.1703	-18.0835	-16.9013	-18.3501	-16.6867	-19.5216	-18.8445	-19.668	-20.1042	-18.4338	-17.8718	-18.1841	-18.4086	-17.6778	-18.482	-14.3105	-16.1892	-15.2534	-14.0988	-15.1637	-13.9497	-11.5923	-12.2464	-13.6006	-15.6145	-14.0125	-16.0916	-14.2002	-19.7032	-18.8707	-25.2143	-18.9243	-19.1694
627.5	803.5	11.1654	4.55207	-15.413	-19.1378	-15.1769	-18.4533	-11.9038	-17.0452	-23.3236	-18.1529	-14.0104	-22.2055	-14.0307	-15.3243	-14.27	-16.5273	-19.2348	-15.2254	-16.3735	-20.0809	-13.7787	-19.6625	-17.4038	-16.8398	-15.0243	-17.7674	-18.244	-17.7147	-13.1927	-13.8344	-13.1964	-14.0958	-16.5148	-14.253	-15.6724	-8.64353	-15.1362	-17.5785	-15.2852	-16.5343	-15.8769	-16.768	-15.3031	-15.9752	-15.636	-14.4514	-20.1209	-24.1083
628.5	803.5	11.1655	4.55207	-17.0811	-18.1861	-14.3965	-17.4299	-13.5256	-17.7258	-19.2578	-19.8381	-13.7535	-21.6998	-14.146	-15.3533	-15.0639	-16.8748	-17.7848	-16.9825	-15.6526	-16.5792	-15.3053	-19.3165	-15.9412	-16.5382	-15.074	-18.7611	-16.3046	-19.5091	-13.0072	-13.9867	-18.1316	-14.8859	-17.2472	-13.7525	-16.2687	-12.1438	-15.0249	-19.1223	-14.4144	-15.6259	-16.9337	-15.6519	-14.1936	-14.5038	-13.6527	-14.1141	-20.9765	-23.0507
629.5	803.5	11.1656	4.55206	-15.9915	-18.408	-14.3617	-17.0014	-14.927	-19.0721	-17.8431	-19.3671	-15.7473	-18.3413	-13.3171	-15.3323	-13.4787	-16.6952	-17.5107	-17.6885	-15.4729	-13.4544	-16.7042	-19.612	-16.1425	-15.6244	-16.0297	-19.139	-15.2853	-21.4274	-15.3879	-16.2101	-23.2623	-15.6885	-16.7014	-16.44	-13.5963	-19.148	-15.9504	-19.1612	-13.1871	-17.5534	-15.2963	-12.5546	-15.2312	-12.2678	-14.3256	-15.9158	-19.9889	-21.4799
630.5	803.5	11.1657	4.55206	-15.971	-17.5743	-15.0653	-15.388	-13.9568	-20.4953	-16.7118	-17.6733	-16.8586	-16.7205	-13.6961	-16.7196	-11.5274	-19.4125	-18.6613	-16.5419	-16.2776	-14.7055	-17.0724	-18.7856	-18.9401	-15.7811	-15.9495	-19.5318	-14.969	-21.195	-17.4397	-17.963	-18.0363	-16.1724	-17.3243	-20.0087	-14.1322	-18.4121	-13.9694	-19.4154	-12.6703	-18.0135	-14.2036	-10.4471	-14.1167	-12.9628	-16.4407	-17.3263	-18.6487	-20.3965
631.5	803.5	11.1658	4.55206	-16.908	-15.5317	-15.5657	-13.6755	-14.1273	-19.4043	-16.4288	-17.4055	-16.0202	-15.5419	-15.7068	-15.4022	-11.0709	-21.6225	-19.0078	-16.9242	-17.3397	-19.155	-16.8603	-18.5604	-26.0568	-17.4347	-14.4507	-20.6194	-15.5523	-18.923	-18.6799	-16.3981	-15.6609	-15.3817	-16.3513	-18.893	-15.9962	-15.8365	-11.81	-15.0509	-11.9726	-18.5842	-17.1311	-10.8961	-12.5616	-15.517	-18.3731	-19.9865	-19.1669	-17.3963
632.5	803.5	11.1659	4.55206	-14.6517	-13.9449	-14.6403	-13.0778	-14.7036	-19.3361	-17.2989	-17.8696	-14.61	-14.1118	-16.1764	-12.7683	-12.1564	-20.7919	-17.6375	-18.6236	-17.4872	-22.5492	-17.9656	-19.851	-20.7402	-19.4739	-14.785	-19.6562	-16.0104	-18.5925	-19.1517	-17.12	-14.8329	-15.838	-15.0297	-17.2349	-18.6187	-13.9822	-11.1141	-12.3179	-12.5086	-19.652	-15.7509	-15.0923	-11.9128	-18.4961	-19.3791	-23.9743	-19.1793	-15.2791
633.5	803.5	11.1659	4.55206	-11.8357	-13.6113	-13.7686	-13.5188	-15.548	-18.662	-18.1931	-16.8203	-13.6058	-13.0686	-14.3119	-11.5793	-13.9472	-17.9161	-16.6201	-18.3401	-17.147	-21.0739	-20.1802	-20.4638	-17.7114	-21.7245	-16.7631	-17.8972	-16.7545	-19.6394	-16.8565	-21.4067	-14.5967	-16.0158	-15.4702	-16.228	-19.3444	-12.5298	-11.9669	-12.1619	-13.4445	-20.2288	-12.9335	-16.7082	-11.7209	-19.2919	-20.1008	-27.4009	-19.6322	-15.3866
634.5	803.5	11.166	4.55206	-11.2178	-15.0609	-14.0983	-15.0798	-14.8906	-17.1997	-18.4452	-15.5056	-13.3129	-13.3764	-13.7538	-10.9772	-12.3471	-15.606	-15.768	-16.6728	-16.4241	-21.3043	-21.0124	-19.8145	-16.6615	-22.5152	-18.8045	-17.6598	-18.3141	-20.0275	-15.1885	-21.634	-15.1421	-14.5819	-16.3503	-16.2629	-17.5036	-12.9161	-14.0735	-13.3836	-12.9302	-16.9443	-13.3366	-17.4591	-12.7415	-19.4254	-20.4949	-22.934	-23.4191	-18.5361
635.5	803.5	11.1661	4.55206	-12.8921	-16.2187	-14.6695	-16.5875	-12.9011	-16.4938	-19.4296	-16.1544	-13.2908	-14.9859	-13.3413	-11.6564	-12.9695	-14.3873	-14.5328	-15.4909	-15.5625	-19.0416	-18.2433	-19.8887	-16.1907	-21.4215	-19.4345	-19.1971	-20.4362	-19.7867	-15.5286	-19.0266	-16.3849	-13.9703	-15.2551	-17.4637	-15.0069	-15.809	-16.3987	-13.6348	-11.7473	-15.0922	-17.1252	-16.9518	-16.8515	-20.2753	-21.9779	-19.5687	-20.4711	-20.5626
636.5	803.5	11.1662	4.55206	-13.6571	-16.4059	-14.681	-15.9719	-11.7804	-16.4069	-19.9732	-17.1551	-14.6899	-16.6997	-12.2855	-12.4963	-14.3597	-14.9595	-13.0891	-16.2563	-15.6589	-16.6825	-15.5718	-19.0953	-16.6303	-20.8156	-18.1667	-21.2752	-20.0392	-19.5976	-17.606	-19.6397	-16.1456	-14.5983	-13.3816	-17.1459	-13.0647	-18.8353	-17.3729	-14.2068	-12.9353	-15.1565	-19.6357	-15.8536	-20.86	-19.6513	-22.4176	-18.6601	-18.3735	-20.459
627.5	804.5	11.1654	4.55198	-14.2225	-17.1438	-15.8082	-16.2647	-12.7021	-17.8368	-22.2179	-18.1012	-15.6239	-26.066	-15.4472	-13.5842	-14.6301	-16.5756	-17.3685	-16.4476	-18.5292	-17.3079	-13.4966	-18.2565	-17.4486	-19.3596	-14.5808	-14.7405	-16.7454	-19.4365	-12.9073	-14.5056	-13.3016	-14.0547	-20.1986	-14.8621	-14.6143	-10.0887	-14.1319	-17.2389	-18.118	-15.5471	-14.3823	-17.3373	-13.6086	-16.4036	-15.418	-14.1728	-17.6397	-22.0066
628.5	804.5	11.1655	4.55198	-14.2836	-17.6718	-15.2134	-15.9182	-12.5451	-16.9144	-18.4524	-18.9045	-13.8595	-19.8665	-14.4048	-13.6091	-16.3722	-18.1175	-17.8454	-18.1977	-17.834	-15.0344	-13.5804	-18.3257	-16.9217	-19.7599	-15.4866	-17.0801	-16.0154	-19.7632	-13.4877	-14.2458	-15.6419	-14.3424	-19.6233	-15.0075	-15.7785	-15.6852	-12.8959	-18.002	-16.7484	-14.8305	-16.136	-16.7363	-12.2396	-15.0615	-13.8215	-14.4003	-19.603	-23.2388
629.5	804.5	11.1656	4.55197	-13.8863	-17.7392	-15.4856	-17.8413	-12.4974	-16.5916	-18.1379	-18.8827	-14.534	-17.0831	-12.9105	-15.1767	-14.7135	-19.3712	-19.7278	-17.7141	-16.0211	-13.7869	-14.371	-19.3239	-17.4425	-18.266	-16.1407	-18.7516	-15.2066	-21.8949	-17.1329	-17.1477	-19.2034	-15.6581	-19.9128	-16.9896	-15.1878	-20.6449	-12.9357	-18.6472	-13.0843	-16.1295	-15.3617	-13.4007	-13.4791	-12.9372	-14.0332	-15.2957	-19.3811	-23.7261
630.5	804.5	11.1657	4.55197	-14.6031	-17.0547	-16.9024	-16.7267	-12.1063	-17.5519	-18.0368	-17.8647	-16.4085	-15.955	-13.6018	-17.5634	-12.4654	-20.3505	-23.5107	-16.4536	-15.3004	-16.0615	-15.3993	-20.7502	-20.4279	-17.1964	-16.9992	-18.2933	-15.1356	-20.8953	-17.134	-19.7367	-19.1706	-15.4148	-20.0581	-19.8916	-15.2073	-18.0406	-12.8353	-18.6922	-13.0251	-17.5639	-15.0157	-11.1912	-14.3634	-12.8474	-15.6826	-16.5615	-17.8917	-21.3822
631.5	804.5	11.1658	4.55197	-15.2819	-15.6543	-18.1008	-14.8132	-12.1275	-18.4928	-17.9318	-17.3311	-17.2808	-15.4605	-16.9211	-17.0482	-10.8414	-21.0553	-22.9178	-17.2219	-15.9598	-20.6757	-15.3843	-21.6075	-23.4825	-18.2923	-18.4672	-17.699	-15.6267	-18.9259	-17.0287	-18.9542	-17.569	-14.0311	-17.3289	-21.822	-16.038	-15.737	-11.8424	-15.4184	-12.358	-17.1085	-16.9352	-12.1507	-13.0279	-14.4054	-17.9252	-17.914	-17.7761	-18.4531
632.5	804.5	11.1658	4.55197	-12.8327	-15.0133	-15.4851	-14.7161	-12.6314	-19.3556	-17.8127	-17.1612	-17.1326	-15.5689	-15.6238	-13.8279	-11.2248	-20.2014	-18.7391	-19.1916	-17.9495	-23.501	-16.622	-20.751	-21.8772	-21.225	-18.8789	-18.5044	-15.73	-19.4277	-18.7978	-21.5255	-17.0671	-15.8959	-15.7741	-19.1018	-16.6924	-14.0318	-11.7844	-12.7174	-12.5069	-14.5262	-15.139	-14.9563	-11.2262	-16.5795	-19.7245	-19.0334	-16.9518	-18.1569
633.5	804.5	11.1659	4.55197	-10.7215	-15.8912	-14.3904	-16.2264	-13.2052	-20.5549	-16.9265	-15.556	-16.2239	-15.9113	-13.7648	-12.8317	-13.5366	-17.6416	-16.5643	-19.3626	-18.2909	-25.3428	-19.3312	-18.2288	-18.3215	-23.3153	-18.3854	-18.6505	-15.9378	-20.1827	-16.061	-24.6549	-17.0813	-15.2264	-16.7867	-17.3956	-17.5295	-13.1063	-13.1741	-12.5408	-13.2677	-13.443	-12.2225	-17.0984	-10.2217	-20.1214	-21.5305	-21.0515	-17.4066	-18.6307
634.5	804.5	11.166	4.55197	-11.3944	-15.9215	-14.2476	-18.1866	-13.8379	-21.1549	-16.2798	-14.4783	-13.9704	-16.2356	-12.9141	-11.661	-14.218	-15.2264	-16.7006	-18.7101	-17.0253	-20.4529	-20.5976	-17.7118	-16.262	-22.1251	-17.9987	-17.6674	-17.7083	-17.5129	-14.1004	-25.5518	-18.3055	-15.3355	-17.7251	-18.0414	-17.9745	-13.8642	-14.649	-13.9233	-13.7843	-15.2214	-12.9804	-18.5996	-11.47	-21.2057	-21.2195	-23.2081	-19.7084	-20.2825
635.5	804.5	11.1661	4.55197	-13.1502	-15.2671	-15.2126	-17.6606	-12.9025	-18.6744	-16.6472	-14.6112	-13.6946	-16.0173	-13.7061	-11.5175	-14.1301	-13.9022	-15.6477	-18.0712	-16.1976	-16.3659	-18.7109	-17.8276	-16.0161	-20.5116	-18.6974	-17.6402	-21.6072	-16.9105	-14.9205	-23.9385	-18.8232	-16.6524	-14.8846	-21.304	-14.7337	-16.5715	-17.0183	-13.7995	-12.6605	-14.9546	-17.0903	-21.0158	-17.0747	-20.507	-20.4071	-20.8003	-18.4116	-20.4144
636.5	804.5	11.1662	4.55197	-12.4872	-14.7534	-15.2619	-15.8161	-12.5903	-16.9893	-15.2641	-15.0917	-14.9089	-16.0073	-13.3286	-12.2605	-13.06	-15.3691	-13.7196	-17.3385	-17.1377	-15.9249	-17.8078	-17.1976	-17.2217	-20.7405	-17.0994	-18.9201	-23.5219	-17.9695	-17.4297	-20.0032	-16.9753	-15.6809	-12.2154	-21.8399	-12.84	-18.8105	-18.9369	-14.4464	-13.3729	-14.7204	-18.5428	-20.6774	-19.6503	-19.9462	-21.3157	-18.6939	-17.1761	-18.3327
626.5	805.5	11.1653	4.55189	-12.9462	-15.6766	-16.3501	-19.4455	-14.555	-19.6255	-24.6726	-17.8911	-18.2955	-19.8198	-14.6361	-15.4651	-13.4631	-14.4827	-18.9005	-16.414	-16.3596	-15.7006	-14.2497	-17.4203	-15.8107	-19.5326	-15.4184	-14.2705	-16.8849	-20.4427	-15.5597	-18.0173	-17.55	-15.249	-19.1451	-18.0652	-16.3684	-10.0736	-12.7292	-17.3188	-16.127	-14.836	-12.8687	-17.9636	-15.8206	-18.2338	-16.034	-17.3044	-15.9641	-17.9085
627.5	805.5	11.1654	4.55189	-13.8032	-16.5866	-15.8945	-15.8333	-12.4775	-19.5172	-20.1783	-17.6572	-17.8033	-20.0553	-13.0927	-13.6832	-14.3195	-13.5875	-18.0033	-16.7372	-17.4263	-14.5064	-15.2874	-17.8674	-18.8597	-20.3567	-16.1633	-15.4421	-16.7233	-20.1821	-13.8127	-15.9183	-14.9879	-15.1042	-18.5717	-18.0908	-15.5947	-13.9889	-14.2388	-15.6377	-18.6638	-13.2097	-14.0279	-16.9555	-13.3608	-17.2284	-15.4259	-15.7947	-16.7316	-19.5358
628.5	805.5	11.1655	4.55189	-13.9605	-15.8099	-15.4382	-15.6488	-12.211	-17.1271	-18.2537	-18.762	-14.6631	-17.2017	-12.2915	-13.4856	-15.3645	-15.1689	-17.8131	-17.6004	-17.6796	-14.1846	-14.021	-17.5992	-20.7008	-20.1328	-16.3514	-15.6312	-16.0389	-20.5858	-14.7869	-15.2295	-14.5601	-15.022	-17.7362	-16.8261	-14.7448	-22.2339	-13.7211	-15.0407	-16.9843	-11.7897	-15.9245	-15.4897	-12.4298	-14.9957	-14.8222	-14.9245	-19.5804	-20.934
629.5	805.5	11.1656	4.55189	-13.8741	-16.0897	-16.0525	-16.9229	-12.5566	-16.0504	-18.9069	-18.9872	-13.7004	-16.2901	-13.2385	-15.5302	-14.7401	-18.0856	-18.7827	-18.3464	-16.3578	-15.1491	-14.0752	-18.4719	-20.0591	-18.4587	-16.346	-16.3157	-15.0687	-22.9153	-17.0181	-18.6285	-16.4691	-16.3137	-17.0772	-16.7174	-14.5729	-21.948	-12.5234	-14.3806	-13.5963	-12.061	-15.337	-13.5693	-13.3142	-13.7486	-14.5601	-14.8246	-19.7397	-19.4757
630.5	805.5	11.1657	4.55188	-15.3626	-16.6412	-19.8575	-16.2138	-12.0252	-16.9036	-19.7548	-18.3731	-15.7116	-16.414	-14.9417	-16.602	-14.6544	-18.9067	-20.1255	-17.2331	-15.844	-16.5581	-15.7723	-20.3268	-19.9828	-17.3683	-18.3423	-17.6057	-15.3213	-20.4965	-15.6215	-20.415	-17.0856	-15.857	-16.1434	-17.3595	-16.0599	-18.2493	-13.8031	-15.1186	-13.5829	-14.231	-15.1657	-13.4342	-15.6541	-14.4062	-14.6098	-15.6411	-16.7369	-15.9948
631.5	805.5	11.1658	4.55188	-15.7341	-15.8559	-18.7485	-15.4304	-10.8893	-17.9667	-18.4424	-17.8009	-20.6727	-17.1262	-17.815	-16.0532	-12.5087	-17.6212	-19.7869	-15.9489	-17.7802	-17.2485	-15.9972	-20.4543	-20.8902	-19.5323	-23.5073	-18.5295	-16.6047	-18.0373	-14.8459	-19.1734	-16.9612	-14.403	-16.1976	-18.6937	-17.3888	-16.8548	-14.0017	-15.1104	-14.7721	-15.1218	-17.8218	-15.5989	-15.3786	-15.6784	-15.0144	-15.5663	-15.3873	-14.4876
632.5	805.5	11.1658	4.55188	-12.6409	-15.3439	-15.8297	-16.8847	-10.5904	-17.7478	-15.9214	-17.1498	-23.0966	-18.9912	-16.4109	-14.9271	-12.332	-17.54	-18.7781	-16.2451	-22.604	-19.3033	-16.1144	-17.9221	-22.5505	-24.384	-27.9488	-19.4023	-16.8952	-19.3765	-15.2281	-21.8608	-18.3306	-16.792	-16.7888	-17.3093	-16.9212	-14.979	-13.3702	-12.7679	-13.3282	-12.5576	-15.4005	-18.0345	-12.3317	-15.7544	-16.7429	-14.7741	-14.6597	-15.6585
633.5	805.5	11.1659	4.55188	-11.2172	-15.2681	-14.6767	-17.8669	-11.0225	-17.4032	-15.2762	-16.3449	-22.0503	-20.0369	-14.4365	-13.2425	-13.9469	-16.4955	-16.8786	-18.0651	-21.6639	-21.9614	-16.8869	-16.2504	-21.7788	-26.5597	-23.6043	-20.9168	-16.7492	-19.0601	-15.468	-22.9362	-19.1011	-14.1607	-18.5531	-16.9499	-16.4708	-12.8433	-13.9473	-12.7688	-12.4833	-12.1809	-12.5334	-16.7945	-10.1408	-18.2096	-19.7059	-17.3062	-15.2449	-19.3086
634.5	805.5	11.166	4.55188	-12.8165	-14.8724	-14.7523	-18.1548	-12.1632	-17.6931	-15.4743	-15.9192	-17.9659	-18.5848	-12.6278	-11.853	-14.6921	-13.8349	-17.5869	-19.3862	-18.7964	-19.5847	-18.8044	-17.1514	-19.8155	-23.9244	-19.8484	-18.5255	-18.3105	-15.7869	-14.2182	-22.4738	-19.7232	-14.7205	-18.8804	-18.1336	-17.072	-13.9208	-14.4577	-14.2887	-14.3244	-15.188	-13.8713	-17.9287	-11.6718	-20.5616	-21.1372	-20.4916	-16.561	-23.5091
635.5	805.5	11.1661	4.55188	-12.6952	-14.4814	-15.8319	-17.66	-13.474	-14.9192	-16.0277	-15.3751	-15.0885	-16.8771	-12.939	-11.368	-13.5386	-13.1731	-17.3862	-19.9841	-16.5431	-15.8889	-19.9275	-17.9662	-18.7352	-20.2648	-22.7627	-17.6906	-21.2452	-15.8969	-14.4077	-24.0114	-20.4024	-17.2451	-14.6079	-19.2597	-15.0871	-17.4896	-15.3321	-14.8789	-14.7201	-16.2473	-18.9208	-21.7965	-17.9921	-21.336	-20.4919	-19.8991	-15.6777	-20.2213
636.5	805.5	11.1662	4.55188	-11.1886	-14.1778	-16.0403	-16.7841	-13.9758	-14.1607	-15.2448	-14.6151	-16.759	-15.7529	-12.7421	-12.3422	-11.879	-15.0758	-15.7044	-20.511	-15.2013	-16.0883	-21.5287	-17.1456	-18.2313	-19.2106	-17.8305	-17.783	-23.0261	-18.2894	-15.9506	-21.6507	-17.7752	-16.3419	-11.2873	-18.2637	-13.9298	-18.0642	-15.9445	-14.8926	-16.3295	-14.8882	-18.8746	-22.5016	-17.4161	-21.88	-20.7019	-20.0699	-14.7549	-17.6687
626.5	806.5	11.1653	4.5518	-12.9726	-18.0196	-15.1438	-17.0137	-14.5675	-19.5304	-22.4212	-17.0709	-19.5752	-16.1505	-14.1618	-15.6595	-15.5451	-12.7226	-18.2069	-17.2102	-14.5202	-15.2333	-16.5576	-17.4063	-16.1878	-17.8193	-16.3972	-17.7368	-16.4149	-19.9052	-18.0486	-16.6649	-18.4212	-14.2938	-17.0591	-16.8413	-16.7921	-15.0427	-14.4643	-16.0042	-16.5901	-13.3535	-13.8413	-19.2143	-14.9064	-19.3666	-17.3024	-17.3037	-16.8648	-17.3324
627.5	806.5	11.1654	4.5518	-14.0476	-17.7807	-15.7439	-16.1577	-13.2168	-17.3585	-19.9799	-17.1554	-18.8038	-16.7733	-11.9004	-15.3304	-13.7595	-11.6173	-19.0506	-15.6942	-15.8597	-13.4157	-17.3307	-18.1836	-20.0395	-18.7922	-16.7846	-18.5929	-16.6989	-19.8584	-15.9252	-16.1126	-14.8432	-14.9661	-15.2891	-16.6829	-15.8621	-18.7051	-15.5142	-14.0833	-16.8864	-14.032	-12.9276	-16.8853	-14.0692	-16.4754	-16.416	-15.4983	-18.1488	-17.694
628.5	806.5	11.1655	4.5518	-15.1182	-15.2975	-14.2672	-16.9134	-13.1708	-15.6475	-18.9797	-18.8224	-16.031	-14.9504	-10.6063	-15.2465	-12.9417	-12.9687	-17.3793	-15.7434	-17.2791	-14.231	-14.7007	-18.7315	-22.1094	-19.0408	-16.7601	-15.8376	-15.1451	-20.58	-15.2318	-16.622	-13.8285	-15.7073	-14.944	-18.1001	-13.3366	-19.3458	-15.0773	-13.2109	-16.1852	-13.0274	-15.4397	-14.943	-13.7223	-13.8235	-15.2136	-12.9702	-20.318	-18.816
629.5	806.5	11.1656	4.5518	-15.1979	-15.495	-14.5767	-18.3799	-14.6674	-15.9	-18.8533	-18.7743	-14.6851	-14.6952	-13.02	-18.1262	-13.3132	-16.4577	-16.4829	-19.4159	-17.4751	-16.475	-14.016	-18.9024	-19.8232	-17.102	-17.2562	-15.0683	-13.2	-21.2114	-15.6182	-18.4997	-17.1233	-15.0751	-14.3084	-16.2299	-12.4844	-16.5296	-12.4525	-12.3856	-13.6686	-11.6864	-17.8601	-14.2141	-14.4054	-13.5355	-15.0846	-12.4292	-19.3632	-17.8759
630.5	806.5	11.1657	4.55179	-14.2406	-16.4301	-16.7442	-17.4689	-14.0408	-17.0469	-17.9255	-17.1291	-16.1021	-16.4834	-15.5978	-16.6148	-15.9844	-17.4233	-15.9214	-19.3614	-17.2387	-15.69	-16.5815	-18.6245	-17.8153	-17.2743	-19.7803	-16.342	-14.0607	-18.6845	-14.888	-17.4635	-16.223	-14.2127	-12.7334	-14.6755	-15.0067	-14.6772	-13.2995	-14.1233	-12.3073	-12.3146	-16.9053	-15.5464	-15.9572	-16.3861	-14.3739	-14.2886	-17.5825	-14.4973
631.5	806.5	11.1658	4.55179	-15.1425	-15.8359	-16.7709	-17.6887	-11.0505	-17.9084	-14.8229	-16.8296	-21.2801	-18.108	-17.9547	-15.9264	-15.3095	-14.6359	-16.6424	-15.9559	-19.1297	-14.9997	-17.7311	-17.8321	-17.9889	-20.2671	-21.0767	-18.977	-17.03	-16.6785	-14.4129	-16.0228	-15.4164	-15.0823	-14.0531	-15.3116	-18.8447	-14.676	-13.2715	-14.441	-12.9112	-12.5846	-17.6937	-19.0737	-16.8594	-16.6427	-14.2921	-14.0038	-15.6405	-12.6169
632.5	806.5	11.1658	4.55179	-13.9881	-14.7896	-15.8292	-19.5047	-10.7146	-16.8097	-13.8744	-17.617	-22.42	-18.0873	-16.63	-16.0859	-15.1201	-15.9272	-17.0193	-15.3255	-21.1773	-15.7794	-16.7657	-17.2812	-20.1361	-23.7662	-20.8714	-23.5944	-19.421	-17.9251	-14.3271	-17.8186	-18.9123	-15.7238	-17.0121	-15.5456	-18.1573	-13.3236	-12.4153	-12.9811	-12.6081	-12.0909	-14.331	-19.9455	-14.5234	-14.219	-16.2507	-13.2114	-14.4862	-13.7218
633.5	806.5	11.1659	4.55179	-13.0923	-13.8646	-15.5195	-19.3278	-11.8951	-16.049	-15.414	-18.348	-20.124	-17.1671	-14.3955	-13.5172	-15.4504	-16.4026	-16.4414	-16.4387	-19.5342	-18.2964	-17.0538	-17.4788	-23.2943	-27.3528	-23.404	-21.0114	-19.957	-16.5681	-14.8542	-18.9938	-22.1533	-13.4743	-17.9593	-16.7626	-16.0825	-13.7574	-12.9476	-13.7266	-11.4031	-13.7641	-12.9644	-18.1241	-12.1585	-15.791	-19.3927	-15.564	-15.2806	-17.2216
634.5	806.5	11.166	4.55179	-13.2656	-13.1961	-16.3211	-18.4687	-12.8009	-15.467	-16.7535	-17.825	-18.0693	-16.2663	-12.7755	-11.6862	-15.6202	-13.9627	-16.9508	-18.2426	-17.6118	-19.3772	-18.4903	-19.6072	-24.1467	-25.4029	-21.1254	-18.1364	-20.1291	-15.3236	-14.2298	-19.2271	-20.4899	-13.5643	-16.5724	-19.478	-16.1772	-16.9754	-13.4401	-14.7055	-13.7695	-16.4174	-15.3524	-18.3463	-13.8534	-19.2332	-19.4136	-15.5436	-15.9663	-20.2683
635.5	806.5	11.1661	4.55179	-12.0227	-13.9928	-16.8049	-18.1556	-14.3257	-13.7786	-17.0385	-15.5179	-16.5191	-15.7719	-12.4309	-11.0564	-14.4727	-13.6985	-17.3031	-19.6805	-16.8571	-19.1051	-20.3251	-20.1853	-25.6298	-21.1664	-19.6673	-18.0411	-20.5667	-16.717	-14.0222	-19.6092	-19.2428	-15.0381	-13.9763	-20.657	-16.5265	-17.0667	-14.4277	-15.3656	-16.3611	-18.2615	-19.2105	-19.5296	-17.1494	-21.2614	-19.9107	-15.9704	-14.3647	-19.7906
636.5	806.5	11.1662	4.55179	-10.6468	-14.3997	-16.8585	-17.8272	-15.4271	-13.5546	-16.588	-13.6386	-16.819	-15.6679	-12.1602	-11.7856	-13.3427	-14.6656	-16.3066	-21.8198	-15.9316	-20.0275	-22.7971	-18.0971	-18.3414	-20.1423	-16.8363	-17.9198	-22.5402	-18.9496	-15.325	-19.5663	-18.0706	-15.2581	-12.3455	-17.5923	-15.6467	-16.9424	-15.227	-15.1424	-18.9548	-16.7345	-19.1372	-18.2534	-17.1704	-21.7261	-19.7949	-18.2281	-13.8995	-18.9876
626.5	807.5	11.1653	4.55171	-12.9321	-16.9146	-16.0986	-15.462	-15.348	-16.8256	-17.1634	-15.4182	-18.9774	-14.8794	-15.1769	-13.9607	-14.3082	-13.6774	-17.1871	-17.8895	-13.5689	-15.934	-18.331	-17.9639	-18.5283	-16.1844	-18.8462	-19.9697	-16.6218	-20.0743	-20.1271	-16.2319	-17.3765	-15.2475	-18.0236	-16.8251	-15.6777	-17.7395	-14.97	-15.0003	-15.2439	-13.4966	-14.3823	-17.0477	-15.4154	-19.6598	-18.6826	-18.3235	-20.5648	-17.01
627.5	807.5	11.1654	4.55171	-12.7508	-16.6025	-16.465	-16.083	-14.2868	-15.2603	-15.4885	-15.9753	-17.6057	-15.1425	-12.5885	-15.0308	-14.2306	-12.001	-17.6846	-16.5933	-16.5351	-13.657	-17.3649	-18.2401	-19.8082	-16.3037	-17.5744	-20.4382	-16.1191	-18.462	-15.9644	-14.0556	-14.9249	-15.8604	-14.762	-16.8403	-16.8007	-17.6643	-15.1281	-13.7955	-15.87	-14.8706	-12.6295	-15.7161	-15.5542	-16.6012	-16.0501	-15.1993	-22.1526	-17.4204
628.5	807.5	11.1655	4.55171	-13.3468	-14.3037	-14.2199	-16.6877	-14.2302	-14.3057	-14.9699	-15.5993	-15.3624	-14.0702	-11.574	-15.3414	-12.7071	-12.928	-17.9899	-16.2046	-17.2218	-15.3516	-13.777	-19.9448	-20.5337	-18.1436	-17.1048	-19.1188	-14.6198	-17.1295	-14.7375	-13.9862	-14.8241	-15.3261	-13.9074	-20.5201	-14.8886	-13.5965	-13.719	-12.2687	-16.4297	-14.5634	-14.9461	-14.4171	-15.2998	-14.8905	-15.1513	-12.309	-22.1057	-18.4083
629.5	807.5	11.1656	4.55171	-13.8703	-15.1001	-13.7133	-18.0699	-16.3689	-13.9591	-16.9821	-14.9231	-15.4151	-15.6733	-13.8547	-16.2996	-13.815	-15.8126	-16.4818	-19.2392	-17.8441	-17.5664	-13.8228	-19.5662	-19.6874	-17.8062	-17.4182	-16.9684	-12.9446	-17.2971	-15.0381	-15.0813	-18.335	-13.9554	-13.4621	-16.0203	-13.3168	-11.2611	-12.522	-11.1936	-14.8076	-13.1549	-18.6427	-14.2063	-15.9671	-16.0853	-15.1567	-13.5458	-17.23	-19.8605
630.5	807.5	11.1657	4.55171	-13.194	-15.9636	-14.719	-19.7288	-15.5234	-14.2915	-15.1273	-14.7008	-16.6251	-18.0624	-16.6908	-15.0444	-16.4663	-16.7022	-15.0908	-19.2458	-18.5922	-16.6245	-16.4433	-19.0037	-18.5111	-19.1834	-19.5136	-16.6355	-13.9246	-18.1445	-15.068	-15.5167	-16.7852	-13.3773	-13.1169	-12.4534	-15.5574	-11.6139	-12.5523	-12.8451	-13.4758	-12.3571	-17.5728	-15.8133	-15.8025	-19.2252	-14.513	-15.2924	-14.965	-17.0378
631.5	807.5	11.1658	4.5517	-13.8214	-15.8752	-16.5272	-20.4012	-12.604	-15.2775	-12.3829	-15.8422	-17.2654	-17.3042	-17.3435	-15.247	-16.6149	-14.2818	-15.1454	-16.3661	-19.8774	-16.3147	-19.3285	-18.0697	-18.6025	-20.4231	-18.9916	-17.403	-17.6847	-17.3739	-15.5749	-16.021	-15.1539	-13.2622	-16.0487	-12.4183	-18.119	-12.9058	-11.7073	-13.3073	-13.7735	-11.1065	-14.3281	-16.8371	-16.2273	-16.1455	-15.5494	-13.8928	-14.638	-13.7548
632.5	807.5	11.1658	4.5517	-15.7701	-15.5511	-17.4387	-19.3812	-12.9845	-14.904	-13.5299	-17.9748	-17.0699	-15.8303	-15.3349	-16.7927	-15.5784	-16.2112	-15.1893	-15.8092	-20.178	-15.9837	-19.0441	-18.2725	-19.6731	-19.9025	-18.0445	-19.0545	-22.5244	-18.3433	-16.5336	-17.8489	-18.6577	-13.3273	-17.5718	-14.4732	-17.3675	-14.9497	-11.8555	-13.0402	-12.1995	-11.5111	-11.983	-16.5228	-16.7789	-13.6985	-19.0792	-13.2733	-14.8763	-14.0509
633.5	807.5	11.1659	4.5517	-16.0558	-15.3555	-18.6145	-17.4009	-14.1483	-15.241	-16.3881	-20.1276	-17.3475	-14.3282	-14.0542	-15.3178	-14.793	-16.5009	-15.1353	-16.073	-17.7552	-16.1968	-18.2834	-20.0413	-22.2646	-20.7006	-19.2561	-17.9741	-22.6781	-16.204	-16.0401	-18.7707	-24.4231	-13.1909	-15.6989	-16.6423	-14.5438	-16.9888	-12.6844	-14.0438	-11.5435	-13.805	-13.3323	-15.8542	-15.6243	-14.5031	-21.2156	-13.8001	-16.1574	-16.9265
634.5	807.5	11.166	4.5517	-13.9152	-14.4981	-20.7559	-16.1689	-14.9402	-16.0545	-19.1431	-19.2398	-18.4702	-13.2385	-13.2147	-12.6218	-14.31	-15.7094	-16.3701	-16.2372	-16.5264	-18.6948	-17.3171	-23.5427	-26.9545	-21.654	-18.7327	-16.9817	-20.895	-15.7933	-14.8531	-17.7421	-22.9853	-13.2726	-13.7217	-18.9272	-13.982	-16.7219	-12.6761	-14.6283	-13.5557	-15.4391	-16.6113	-16.1038	-16.6947	-17.6427	-19.4263	-13.7124	-17.5282	-17.8707
635.5	807.5	11.1661	4.5517	-12.1892	-14.5201	-21.0523	-17.4716	-16.3424	-16.0651	-18.6964	-15.4182	-17.5916	-13.9442	-12.5856	-11.3638	-14.2016	-16.7352	-17.0813	-16.919	-18.4075	-22.3742	-17.8703	-23.1443	-28.4835	-22.0414	-17.1597	-17.928	-19.2016	-17.4978	-14.4369	-16.5874	-20.2467	-13.3076	-12.744	-19.7128	-14.7053	-16.5286	-13.4919	-14.2523	-16.8914	-17.0229	-19.5133	-16.4433	-17.648	-19.6727	-20.1987	-14.891	-16.8067	-18.9846
627.5	808.5	11.1654	4.55162	-11.9715	-15.3318	-16.8288	-15.9863	-13.6736	-14.944	-14.426	-15.5546	-15.7188	-15.2257	-13.7355	-14.3204	-13.7368	-14.4515	-18.4161	-18.3432	-16.9339	-16.4275	-15.925	-17.3444	-20.6892	-17.6635	-20.9192	-20.296	-16.2864	-17.7602	-15.8849	-13.3519	-16.684	-17.9556	-16.7324	-15.4205	-16.6237	-13.7811	-12.2597	-13.7544	-14.2937	-14.8459	-13.4791	-14.4229	-16.9176	-17.6709	-18.0456	-15.9782	-18.4799	-19.3129
628.5	808.5	11.1655	4.55162	-11.5764	-14.6329	-15.2869	-15.5028	-14.1524	-15.26	-13.8796	-14.8228	-15.0117	-14.9362	-12.4674	-14.8036	-14.1644	-14.3048	-18.636	-18.5949	-17.3636	-18.09	-13.539	-19.2929	-19.0723	-19.5309	-18.2636	-20.9621	-14.9042	-16.1356	-15.6149	-11.8007	-17.5921	-16.3593	-14.7891	-19.4762	-15.1902	-10.9457	-12.8281	-12.7596	-14.2395	-14.9561	-15.4396	-13.2904	-15.3744	-16.527	-17.0217	-13.7874	-23.2392	-19.8958
629.5	808.5	11.1656	4.55162	-11.281	-14.7716	-15.0181	-16.108	-16.052	-14.3078	-15.3743	-14.9808	-16.1446	-17.0369	-12.9722	-14.6739	-15.7409	-14.8346	-17.218	-19.3884	-18.0202	-18.205	-14.341	-20.8362	-19.4537	-21.4665	-16.8398	-20.6554	-13.6365	-15.4474	-15.9253	-13.0006	-19.8929	-14.5983	-14.4558	-15.4371	-14.8314	-10.4145	-13.9788	-11.5558	-14.279	-15.5881	-18.1417	-14.0803	-16.1393	-17.6253	-16.599	-16.1866	-17.4356	-21.3143
630.5	808.5	11.1657	4.55162	-11.9588	-15.5839	-16.3191	-18.2016	-15.9146	-12.9307	-13.9067	-16.3406	-16.0197	-18.2081	-14.3565	-14.3422	-17.3531	-14.2836	-15.9868	-18.657	-19.8395	-17.7771	-17.1031	-19.841	-20.972	-23.2518	-18.4876	-18.8935	-14.1289	-17.5645	-16.6507	-14.9953	-16.6169	-14.3123	-15.3561	-11.781	-15.4343	-11.0586	-14.729	-12.3251	-15.5178	-14.1078	-16.8297	-15.6353	-15.622	-18.4473	-15.9999	-17.121	-14.754	-21.0661
631.5	808.5	11.1658	4.55161	-13.0762	-17.0306	-19.2538	-19.5998	-15.6427	-13.3223	-13.057	-17.3912	-14.7278	-17.637	-15.4188	-15.148	-15.8043	-14.6918	-15.3222	-16.5854	-22.6029	-17.618	-20.48	-17.5433	-22.7205	-21.4215	-19.8058	-17.7889	-16.5104	-17.2837	-17.8484	-17.528	-15.1623	-14.34	-17.0591	-12.1533	-15.2058	-13.3545	-14.9626	-13.5418	-15.2	-11.5892	-12.9694	-15.0536	-15.8148	-16.5218	-16.6543	-14.1658	-14.4958	-17.4004
632.5	808.5	11.1658	4.55161	-14.8219	-18.7836	-20.2486	-19.2826	-16.2544	-14.1641	-15.3203	-18.2473	-14.6023	-16.8029	-15.1008	-17.7814	-13.6072	-16.5001	-14.2176	-14.3593	-22.8921	-16.6258	-19.8363	-16.6018	-21.0729	-19.2714	-18.9652	-17.798	-20.1578	-16.9929	-18.2559	-19.1051	-17.2991	-13.7206	-16.1371	-15.3983	-14.6445	-16.2374	-15.2168	-13.8712	-12.7182	-11.1309	-11.333	-14.2509	-17.7291	-15.2939	-20.7449	-13.5486	-14.6779	-16.2473
633.5	808.5	11.1659	4.55161	-17.4746	-19.8681	-20.1389	-17.8797	-16.533	-15.371	-19.5369	-20.846	-16.6011	-16.1542	-15.1565	-19.818	-13.2764	-16.442	-13.8103	-12.9055	-18.1128	-15.9518	-16.5666	-17.3212	-21.2135	-18.7698	-17.6706	-17.1836	-21.6138	-17.0887	-16.8164	-18.2554	-19.4124	-13.4229	-14.1123	-17.6975	-13.2494	-15.897	-14.0723	-14.0337	-12.4811	-12.4413	-13.3992	-13.7038	-17.0255	-16.0738	-23.8226	-13.9076	-15.9882	-18.901
634.5	808.5	11.166	4.55161	-17.7994	-18.5205	-20.0775	-16.663	-17.0235	-17.4956	-21.8462	-20.7318	-19.6896	-15.4395	-14.8524	-15.6922	-13.3074	-16.9274	-16.7123	-13.883	-17.3287	-16.7432	-15.0756	-19.1084	-24.033	-19.8273	-17.3599	-16.5182	-19.0458	-17.3189	-15.9516	-17.1336	-19.462	-13.0461	-12.4078	-17.3268	-12.4163	-15.6093	-13.0606	-13.4629	-14.3051	-14.0649	-17.3493	-13.8453	-16.5829	-17.5919	-22.0267	-14.6317	-17.8318	-19.4705
635.5	808.5	11.1661	4.55161	-14.8642	-16.0299	-20.3481	-15.7414	-18.4145	-20.1911	-21.1784	-17.5218	-19.9348	-14.663	-13.8385	-13.2262	-13.2335	-19.4962	-17.1691	-15.4074	-19.5307	-19.1425	-16.2939	-20.3787	-26.1286	-21.7458	-17.0757	-16.4937	-17.147	-18.0543	-14.0326	-14.9954	-19.1307	-12.3531	-11.7359	-16.3497	-12.4685	-17.3147	-13.2849	-12.7589	-16.9974	-16.3413	-19.9136	-14.747	-17.3238	-18.4289	-21.0517	-16.2364	-21.2112	-21.3135
630.5	809.5	11.1657	4.55153	-11.8686	-16.3769	-15.7605	-16.2148	-15.7085	-14.2499	-15.7338	-17.6608	-15.052	-16.8796	-13.6699	-16.634	-15.8848	-13.297	-16.3693	-19.6101	-19.4707	-16.5525	-18.6116	-20.1915	-22.9277	-23.1003	-19.1525	-19.0882	-14.6739	-18.3096	-17.2164	-15.0003	-18.539	-16.0022	-16.837	-12.2558	-14.0323	-11.5531	-16.2384	-14.8891	-14.2424	-15.762	-17.3734	-17.2098	-17.9533	-16.0476	-17.4015	-15.7252	-17.3968	-19.1233
631.5	809.5	11.1658	4.55153	-12.6194	-18.5983	-17.8109	-18.6647	-18.5607	-14.0712	-14.7505	-17.0235	-14.5644	-17.7327	-14.252	-16.5787	-13.3272	-13.7555	-16.4267	-17.8754	-19.2528	-16.0719	-19.8467	-17.3199	-29.1737	-22.915	-19.9065	-17.9459	-15.8635	-15.887	-16.855	-18.8828	-17.4413	-17.5042	-15.6851	-13.5257	-12.8597	-14.4206	-14.6578	-16.0424	-14.8108	-13.1739	-14.1029	-15.0186	-16.3874	-17.9656	-19.0794	-13.9983	-16.661	-20.4054
632.5	809.5	11.1658	4.55152	-12.5479	-17.4159	-18.9949	-19.6596	-20.1106	-15.3495	-15.1626	-17.0449	-14.9745	-18.7504	-15.6626	-17.1316	-11.5669	-14.9435	-14.1995	-13.7404	-17.2243	-14.7613	-18.5279	-14.9361	-22.8526	-20.9733	-18.8094	-17.0481	-17.6265	-14.8801	-15.1614	-19.0248	-17.0553	-16.2822	-13.8796	-18.0711	-12.5848	-16.8067	-13.5913	-14.6246	-13.1426	-11.9868	-12.9197	-13.172	-16.902	-18.5558	-22.786	-14.7227	-15.6494	-20.5993
633.5	809.5	11.1659	4.55152	-14.2324	-15.6047	-19.0944	-18.6189	-19.3491	-16.5722	-16.4622	-20.6511	-17.8179	-19.4073	-17.1918	-17.4376	-12.1721	-15.7741	-14.0693	-11.3626	-16.7536	-14.0992	-15.5698	-13.9852	-21.2124	-19.6472	-16.9944	-17.7982	-19.0325	-15.8432	-14.9738	-17.2946	-15.9361	-14.4033	-13.2903	-19.075	-12.9339	-17.6186	-13.1058	-13.4553	-13.1426	-12.0765	-15.111	-13.7604	-15.5518	-17.9998	-23.5145	-16.5442	-16.3535	-21.2497
634.5	809.5	11.166	4.55152	-18.5025	-14.6363	-18.2571	-17.3152	-18.5214	-16.8812	-19.6476	-22.0232	-20.1546	-18.5594	-18.9572	-16.3922	-12.8078	-16.4438	-16.0323	-12.7307	-18.3119	-15.116	-15.3453	-14.6499	-21.4255	-19.3541	-16.7394	-18.0183	-17.8218	-17.352	-16.0904	-17.0641	-15.6561	-13.4114	-12.4842	-16.8318	-12.9148	-18.1672	-12.7985	-12.3618	-14.6241	-13.1704	-18.2433	-15.1756	-14.4799	-18.3517	-22.8807	-17.3484	-17.9872	-22.8175
634.5	810.5	11.166	4.55143	-14.8625	-10.6638	-15.5182	-15.8119	-19.1916	-15.4714	-18.6984	-17.1584	-20.6645	-16.1693	-14.974	-14.4248	-10.6468	-16.8719	-15.7562	-14.4139	-17.0654	-15.4703	-16.5674	-14.2304	-23.9531	-18.4258	-15.3078	-20.1371	-18.4071	-15.8605	-15.4211	-19.8673	-15.3939	-14.2613	-14.0053	-16.1384	-15.2563	-18.7617	-12.1763	-12.4937	-14.6624	-12.7374	-17.5652	-16.0466	-15.4458	-17.3248	-21.1308	-20.4076	-16.8983	-18.1265
622.5	849.5	11.1649	4.54795	-13.5433	-18.1167	-17.3418	-14.5886	-17.4588	-16.0845	-15.807	-17.6037	-16.9252	-15.6451	-12.678	-15.7335	-15.6735	-18.1179	-15.3232	-18.3331	-16.7835	-18.7196	-16.5064	-18.7702	-23.5852	-16.0917	-13.6873	-18.6571	-16.8496	-16.2308	-17.8609	-14.2116	-16.1126	-13.1125	-14.383	-17.9402	-14.8357	-17.3016	-14.278	-13.6478	-15.6982	-12.1397	-11.4128	-19.2358	-15.8408	-13.0337	-19.2623	-14.1593	-15.5797	-18.1579
623.5	849.5	11.165	4.54795	-12.4833	-18.3995	-16.5925	-12.7632	-17.9551	-18.3756	-17.1484	-16.9924	-15.816	-18.0307	-15.0348	-19.1167	-14.0898	-18.3953	-15.374	-18.6477	-18.8815	-21.6336	-20.7362	-21.5504	-20.3844	-14.022	-15.0147	-17.7322	-15.8867	-18.6214	-18.2023	-15.9781	-19.4843	-13.4748	-15.303	-18.3462	-14.1086	-19.6318	-13.9013	-13.2047	-16.7719	-15.1791	-11.8723	-18.1108	-14.8638	-15.3761	-19.2107	-15.3233	-15.994	-17.9835
624.5	849.5	11.1651	4.54795	-12.4673	-17.3545	-16.5667	-15.3713	-16.4029	-19.793	-16.9123	-17.1433	-15.5573	-21.0751	-16.1218	-17.1815	-12.5268	-15.8255	-15.8589	-16.6433	-18.4512	-20.1522	-21.7955	-23.0093	-16.9571	-13.9359	-18.4373	-16.3615	-15.488	-19.5019	-17.3152	-16.7817	-19.0906	-13.1347	-15.5886	-16.0895	-14.6207	-19.2441	-13.903	-13.5534	-15.9206	-17.9317	-13.1806	-14.4893	-15.6167	-16.3424	-17.6377	-17.7877	-17.8771	-17.8718
625.5	849.5	11.1652	4.54795	-12.2908	-15.6707	-15.499	-19.0942	-16.511	-18.2316	-16.3278	-17.2768	-14.4195	-22.8292	-16.7058	-16.8293	-11.3028	-14.9503	-16.0375	-16.7858	-17.5325	-17.9103	-20.1935	-25.6985	-15.8847	-15.1295	-19.5721	-16.0745	-15.3528	-20.1764	-16.8194	-17.4545	-20.0663	-12.9208	-14.8641	-15.6244	-16.3132	-18.2921	-14.4335	-14.6849	-14.1056	-16.7406	-13.1527	-15.4938	-18.0276	-16.0877	-15.4784	-17.1469	-17.2612	-18.5316
622.5	850.5	11.1649	4.54786	-11.5963	-15.5829	-15.9613	-14.1372	-17.2613	-17.0784	-17.7217	-19.6415	-14.7346	-16.2247	-13.4249	-15.59	-12.7279	-16.4951	-16.7879	-16.7354	-15.0652	-17.7474	-14.8661	-17.1624	-22.9338	-17.6633	-14.6413	-17.7995	-18.0026	-15.0376	-16.782	-14.1028	-14.0462	-14.1916	-16.853	-19.816	-12.7982	-17.1719	-13.8127	-13.2	-16.9589	-14.2925	-13.8059	-18.1619	-15.4114	-16.0582	-19.6381	-16.07	-13.2374	-18.7842
623.5	850.5	11.165	4.54786	-11.0751	-16.4787	-16.1625	-12.8028	-15.619	-18.658	-18.4053	-17.7012	-13.3812	-16.639	-15.2108	-16.9116	-12.5366	-17.8267	-17.183	-19.7156	-16.2671	-19.6448	-18.5564	-19.9369	-20.4435	-16.4997	-16.4827	-20.5842	-17.9773	-15.1055	-16.0672	-14.9782	-17.2098	-13.7798	-17.9165	-17.5676	-13.1018	-19.1322	-16.6266	-13.361	-15.9408	-14.6255	-14.9945	-16.6968	-14.9922	-18.4775	-19.5285	-17.0612	-13.8153	-18.8158
624.5	850.5	11.1651	4.54786	-11.4232	-14.6829	-15.6364	-13.6379	-15.732	-18.1771	-20.6303	-17.144	-13.9538	-18.4701	-14.7832	-15.2842	-13.0376	-16.6878	-17.3636	-18.0768	-16.4318	-18.9449	-20.5319	-24.4569	-18.4188	-16.3787	-20.0869	-17.9459	-17.5933	-15.9983	-15.232	-15.3925	-21.8405	-12.9238	-16.394	-15.2589	-14.3224	-18.421	-17.6872	-14.4731	-13.7109	-14.7735	-15.1023	-15.3381	-16.0418	-21.4149	-17.9239	-18.1727	-17.0913	-19.1753
625.5	850.5	11.1652	4.54786	-12.4389	-12.7234	-15.552	-15.4958	-16.6358	-15.8395	-21.9662	-17.6869	-14.8124	-19.7059	-15.8404	-13.9327	-12.5542	-16.9128	-18.3727	-15.8873	-15.9881	-17.1392	-18.7833	-25.9712	-19.0292	-16.5462	-20.1851	-17.0564	-16.7493	-18.7745	-15.183	-17.6127	-24.9308	-13.0484	-14.0131	-14.6346	-16.7263	-16.1919	-17.7343	-15.565	-12.1444	-13.4177	-13.7102	-15.5301	-18.9663	-20.8607	-16.4107	-16.1995	-17.5828	-17.1986
621.5	851.5	11.1648	4.54777	-11.0651	-15.5157	-14.1317	-17.5658	-17.4157	-19.1569	-16.292	-16.3799	-15.024	-16.1586	-12.4307	-14.8171	-10.508	-20.7786	-16.8015	-12.5333	-16.1847	-15.6823	-14.054	-16.1194	-16.5986	-16.2511	-15.7514	-12.8276	-17.3119	-16.0183	-13.6258	-13.716	-13.2687	-17.2839	-17.0015	-17.8933	-12.8235	-14.5059	-12.3657	-14.3842	-14.2225	-14.351	-14.143	-15.8819	-14.5625	-15.1352	-15.1038	-14.5769	-15.362	-21.3237
622.5	851.5	11.1649	4.54777	-10.838	-13.8642	-15.6165	-16.0599	-14.9108	-18.0191	-17.6608	-19.9878	-14.3199	-16.2943	-14.309	-14.868	-9.01642	-22.7462	-15.6542	-16.2225	-15.6205	-17.5987	-14.2638	-17.6047	-18.3565	-16.5405	-17.7969	-14.865	-17.2598	-14.9372	-14.8353	-15.0956	-12.9956	-18.6534	-20.0293	-18.3909	-13.1935	-16.1765	-13.9035	-13.9772	-16.9675	-13.1316	-14.386	-16.9454	-14.3376	-17.8388	-16.577	-14.9531	-13.7768	-18.2917
623.5	851.5	11.165	4.54777	-11.5962	-14.9688	-16.3179	-14.9474	-13.6418	-17.8209	-18.3259	-18.3959	-13.2395	-16.7185	-15.284	-15.62	-10.353	-19.0597	-15.7803	-19.508	-15.2821	-20.9665	-16.9584	-20.6039	-21.1029	-17.6977	-24.3197	-18.6649	-16.9732	-14.48	-15.5255	-15.314	-14.6116	-16.4002	-21.9098	-18.4921	-14.0137	-16.3778	-16.3284	-14.8042	-16.4968	-13.5374	-14.2427	-15.9725	-14.6024	-19.1423	-16.8448	-15.9744	-14.2936	-17.8614
624.5	851.5	11.1651	4.54777	-12.9011	-14.7011	-15.4758	-13.8486	-14.9453	-16.1568	-21.022	-17.1166	-14.05	-19.2265	-14.4295	-16.1463	-13.0782	-17.9401	-18.2832	-19.7835	-15.3631	-18.9281	-17.478	-23.751	-20.862	-22.2567	-23.6497	-18.5308	-17.4137	-16.1065	-15.07	-16.287	-18.0212	-13.9862	-17.9553	-17.6835	-14.8476	-14.9466	-17.0687	-16.5021	-13.7498	-15.7465	-14.8962	-15.3771	-15.719	-20.9425	-16.8828	-16.8506	-15.6902	-16.5517
625.5	851.5	11.1652	4.54777	-13.8191	-12.4112	-15.959	-13.4792	-16.6783	-13.7756	-23.4287	-17.0675	-15.7824	-19.3252	-15.0828	-14.3689	-13.309	-18.5065	-21.5154	-15.9128	-15.8231	-16.5025	-17.6437	-20.6436	-20.4361	-19.426	-20.8071	-18.107	-17.7408	-19.9957	-14.8448	-16.9359	-17.7143	-13.7401	-14.115	-14.2236	-14.8849	-14.074	-16.1345	-14.9163	-12.0833	-13.8316	-13.2696	-15.8889	-16.5457	-20.8664	-16.3851	-15.2841	-15.8566	-15.8321
333.5	645.5	11.1393	4.56651	-16.3887	-13.1445	-16.2265	-16.5962	-16.6605	-18.5188	-17.618	-19.0933	-13.4556	-12.4021	-10.326	-14.0876	-15.4341	-18.3098	-20.8657	-14.1908	-14.9915	-18.1471	-16.4722	-18.4825	-15.6961	-16.9157	-19.8063	-18.716	-18.5127	-18.5435	-20.0893	-15.8545	-15.6708	-13.1179	-13.0034	-12.273	-12.3784	-12.9915	-14.2294	-15.5127	-15.7566	-13.5091	-13.2853	-17.0135	-15.1485	-15.8809	-17.7503	-15.3688	-16.0396	-20.4147
334.5	645.5	11.1394	4.56651	-16.1026	-13.3322	-14.8421	-15.9954	-16.4481	-21.2693	-20.2649	-16.8648	-16.0897	-12.0736	-10.598	-12.4914	-12.4074	-17.2688	-20.771	-13.4821	-16.2659	-14.4453	-15.0105	-20.7833	-17.5526	-15.4136	-18.998	-18.4003	-20.4382	-19.9024	-22.9924	-13.2548	-17.7396	-14.2102	-14.3051	-14.5233	-17.4276	-14.5633	-13.0663	-17.137	-17.4442	-15.9053	-16.909	-17.4625	-14.3372	-17.5481	-23.0241	-16.9011	-15.4492	-20.3758
335.5	645.5	11.1395	4.56651	-14.9458	-14.9016	-12.9427	-17.2562	-17.4518	-14.4953	-17.04	-15.4778	-17.6532	-11.3697	-11.8434	-12.2993	-11.4854	-19.2426	-17.7041	-14.6021	-14.9724	-14.6002	-15.1023	-19.8001	-18.7558	-15.0079	-18.1808	-19.3226	-20.5056	-15.6322	-22.1581	-13.1098	-17.2668	-14.3487	-14.9573	-19.6192	-16.8008	-10.491	-14.1793	-15.7931	-14.6529	-19.8452	-22.1061	-19.8181	-16.3804	-17.8019	-21.7829	-17.1373	-15.4889	-20.9089
336.5	645.5	11.1396	4.56651	-12.9577	-14.5868	-11.8348	-17.585	-18.6169	-14.9359	-13.8143	-15.241	-14.7514	-12.4499	-14.431	-12.3466	-11.527	-15.3166	-15.9316	-15.717	-16.7206	-16.0428	-14.8374	-17.8639	-19.1957	-16.0997	-16.1102	-18.7524	-18.0378	-15.5017	-17.9507	-14.0184	-17.0044	-13.2112	-16.4001	-19.2537	-16.3036	-10.1879	-17.2491	-13.9238	-13.3739	-14.7445	-20.285	-18.001	-18.4494	-16.6212	-21.5017	-17.671	-16.3831	-20.2764
337.5	645.5	11.1397	4.56651	-12.2416	-12.247	-12.1897	-18.1055	-15.2158	-14.8095	-12.843	-15.5675	-13.4911	-14.3087	-15.8359	-12.91	-11.975	-12.2976	-14.9875	-16.7204	-19.8693	-15.2997	-13.833	-17.5364	-18.8814	-18.6978	-15.6528	-17.788	-17.0969	-18.1912	-14.5641	-14.593	-17.2229	-14.7489	-17.861	-17.8315	-16.3431	-11.6451	-15.8994	-14.07	-14.2801	-13.0729	-17.3418	-14.5888	-19.2575	-17.6714	-20.1328	-16.2482	-17.544	-19.47
338.5	645.5	11.1398	4.56651	-12.5049	-11.8746	-13.7646	-18.7829	-13.1605	-13.5573	-12.7576	-15.9704	-14.7098	-16.0032	-14.6814	-14.9981	-11.6046	-12.4304	-14.8471	-16.6548	-18.1824	-15.1138	-13.3824	-19.1372	-18.6409	-20.5111	-15.6217	-16.5189	-17.6568	-20.3334	-13.0649	-15.7895	-15.4606	-18.4709	-19.0255	-17.1763	-13.7485	-13.565	-15.6853	-15.7121	-14.2009	-14.1869	-15.2526	-13.7476	-19.6563	-21.7786	-17.2194	-14.8214	-15.8488	-22.3437
333.5	646.5	11.1393	4.56643	-15.0937	-15.5369	-14.3805	-16.8475	-17.7721	-16.0247	-16.5384	-16.2661	-13.6006	-13.4774	-11.1813	-13.5235	-16.4559	-18.2682	-19.4843	-14.1526	-15.4167	-17.4385	-16.6705	-18.4004	-19.1058	-16.2328	-20.7655	-15.9665	-22.0105	-19.2946	-20.378	-17.6038	-16.491	-14.3104	-14.9545	-12.1135	-14.1098	-14.4052	-14.9057	-16.2384	-16.247	-13.8684	-17.0685	-17.0043	-15.0764	-17.0379	-18.9755	-17.8746	-16.6774	-19.8481
334.5	646.5	11.1394	4.56642	-16.2568	-13.2808	-14.2259	-15.2786	-16.1686	-15.6901	-15.1202	-15.754	-16.3202	-14.6649	-11.2133	-12.6538	-13.7721	-17.9904	-15.9417	-13.9722	-18.8874	-13.1501	-16.1423	-20.6301	-21.4982	-15.5796	-21.7479	-16.083	-27.3586	-17.1054	-20.8329	-13.6762	-15.9077	-13.9626	-14.7836	-14.8176	-18.9511	-12.9308	-13.5011	-15.0621	-15.7722	-13.3108	-19.6733	-19.5313	-16.265	-17.2449	-20.2767	-17.4514	-15.3212	-17.3571
335.5	646.5	11.1395	4.56642	-15.9142	-12.5539	-13.3125	-16.1371	-15.7995	-14.0447	-13.0635	-15.9875	-18.8246	-14.8334	-11.7266	-12.1192	-12.4871	-20.3173	-15.5104	-15.02	-15.8203	-13.6914	-15.4349	-19.6499	-20.3972	-16.5684	-19.1884	-17.0283	-19.0715	-15.4236	-17.2298	-13.9107	-13.691	-14.7893	-15.6854	-19.1708	-15.9174	-10.8081	-14.3057	-14.0028	-13.6912	-14.0711	-20.3643	-20.1974	-17.635	-19.2754	-19.9954	-14.8633	-15.4785	-19.1141
336.5	646.5	11.1396	4.56642	-12.6736	-12.8575	-12.7781	-18.7372	-16.118	-14.4671	-11.8659	-16.3119	-17.8444	-14.3305	-13.2548	-11.8218	-12.3764	-18.618	-16.6625	-16.3172	-15.1679	-16.4602	-14.679	-16.0369	-20.0745	-18.7356	-15.7021	-18.3756	-15.1917	-16.7825	-16.6383	-14.1364	-16.1172	-14.5904	-18.7755	-21.3622	-15.0433	-10.0208	-16.4047	-14.0685	-14.6198	-11.1226	-18.6942	-17.5605	-17.1355	-18.0889	-18.2308	-15.7581	-17.1817	-20.0141
337.5	646.5	11.1397	4.56642	-11.3045	-11.796	-13.5348	-19.5799	-14.7215	-14.9717	-12.0894	-15.0461	-17.3755	-14.7267	-13.4593	-11.4585	-12.2156	-15.1961	-16.1511	-17.0979	-16.5258	-17.6623	-13.4155	-14.8721	-20.4332	-21.084	-13.9624	-17.8053	-16.0533	-18.9551	-13.5951	-14.8063	-16.0572	-14.6426	-17.9121	-18.2448	-16.5876	-11.5701	-14.7075	-15.7375	-15.3886	-10.6728	-16.5961	-14.6879	-20.3804	-17.6846	-16.2592	-15.256	-18.6461	-19.1059
338.5	646.5	11.1398	4.56642	-12.0271	-11.7276	-14.0688	-17.8297	-12.9611	-14.5505	-13.3584	-15.33	-18.6781	-15.9768	-13.2462	-12.4852	-11.0713	-14.2689	-15.5812	-17.1554	-16.36	-16.1147	-12.2257	-16.9574	-21.9073	-21.8866	-13.5362	-15.8493	-19.2894	-18.5945	-12.4403	-17.9336	-14.5214	-17.7315	-16.3643	-15.2816	-14.7129	-17.3388	-14.5672	-18.3248	-12.6174	-12.68	-16.2824	-12.9291	-17.9833	-19.498	-16.509	-13.6347	-16.3992	-19.5478
333.5	647.5	11.1393	4.56634	-14.4869	-18.2755	-12.3225	-15.0658	-17.1652	-13.6317	-13.8528	-13.6117	-14.7236	-14.4578	-13.6211	-14.5968	-18.5604	-17.9371	-17.0671	-15.7427	-14.5451	-17.9379	-16.1155	-19.3159	-21.2906	-16.7551	-15.6188	-14.2649	-21.2372	-16.5324	-16.9161	-19.7244	-18.1817	-16.0419	-14.1867	-13.6166	-15.0114	-15.3776	-17.831	-15.7216	-16.0984	-14.0219	-21.6897	-17.7717	-15.7165	-15.8878	-18.559	-19.6345	-18.3258	-18.4246
334.5	647.5	11.1394	4.56633	-14.9073	-14.777	-13.8117	-14.1736	-14.6888	-14.2833	-12.8195	-14.0256	-15.9607	-16.2425	-13.5194	-14.3008	-15.4377	-17.949	-14.667	-16.9147	-17.2197	-15.44	-16.1503	-21.4792	-23.873	-17.9638	-16.824	-14.0207	-23.4189	-14.7573	-17.6951	-18.195	-17.8412	-15.1991	-14.4859	-17.3877	-18.2612	-13.0759	-16.6065	-14.4137	-14.4784	-11.837	-18.9151	-18.2338	-17.3348	-17.1983	-17.0682	-18.8327	-16.4109	-16.0651
335.5	647.5	11.1395	4.56633	-12.8731	-13.2943	-13.8216	-14.5836	-13.3491	-15.4317	-11.6243	-16.8599	-16.7728	-17.8726	-13.7331	-12.8157	-14.1676	-18.785	-16.3104	-17.4882	-14.6516	-15.5639	-15.1683	-19.0923	-20.3861	-20.4951	-17.598	-14.3945	-17.564	-15.1491	-15.726	-17.4105	-15.4524	-15.8979	-16.4875	-18.7238	-15.9948	-9.93593	-16.2305	-13.1863	-13.8514	-11.7984	-16.3311	-15.134	-16.3111	-18.5548	-17.9251	-16.1923	-15.9563	-16.2337
336.5	647.5	11.1396	4.56633	-10.8538	-12.1655	-14.3961	-17.3109	-14.1062	-16.8187	-11.096	-15.8343	-17.9066	-15.6005	-13.3352	-12.1288	-14.0004	-18.4872	-18.8971	-20.4218	-13.5864	-18.8163	-14.8327	-15.7983	-17.826	-22.1477	-14.8013	-16.9631	-14.1224	-17.2935	-16.6562	-15.875	-16.1741	-16.8187	-20.1699	-19.3434	-14.2857	-8.55071	-15.0319	-14.4367	-16.5328	-9.8558	-15.7738	-17.097	-17.4418	-18.3973	-17.6379	-15.4823	-16.3627	-17.1959
337.5	647.5	11.1397	4.56633	-10.6748	-11.7203	-15.0171	-17.5904	-14.2532	-17.6001	-12.21	-13.2995	-20.0661	-13.7519	-12.4165	-11.6203	-12.8589	-17.1161	-16.3934	-19.5867	-16.1282	-20.415	-14.8318	-14.7002	-18.2868	-21.4502	-13.1658	-18.7132	-15.7108	-16.4075	-13.9139	-15.8981	-14.1197	-16.9493	-15.7897	-19.1293	-15.9597	-13.1204	-12.9652	-17.843	-17.8885	-9.93539	-14.2525	-16.5555	-21.8036	-17.9848	-13.9911	-15.0783	-18.7067	-19.1274
338.5	647.5	11.1398	4.56633	-11.6497	-11.8423	-15.6902	-16.0018	-12.6557	-17.9743	-14.493	-13.8055	-21.4525	-13.2162	-13.1005	-12.1986	-11.9027	-16.7983	-17.2088	-17.8811	-17.5555	-16.1393	-13.1402	-17.1268	-20.0391	-20.5551	-13.0563	-15.9134	-19.6756	-15.2519	-12.9581	-18.5036	-13.8218	-18.418	-14.3866	-16.2093	-17.9903	-18.0745	-13.9272	-19.4499	-13.1116	-12.4662	-14.6992	-14.1252	-16.8128	-18.243	-14.7711	-13.9114	-18.0154	-18.8374
333.5	648.5	11.1393	4.56625	-14.308	-18.9568	-12.5552	-14.5035	-15.5754	-13.0525	-12.7168	-11.6789	-15.7639	-14.3518	-15.1487	-13.6363	-18.0997	-18.137	-15.2943	-17.5806	-13.2602	-18.2578	-17.331	-22.911	-20.4094	-18.2273	-11.6992	-13.4182	-17.4479	-15.098	-14.9653	-17.4243	-19.5554	-16.0366	-16.7133	-14.9348	-15.0341	-14.2784	-19.2535	-14.9804	-15.0814	-15.7537	-16.9574	-18.3035	-16.1224	-13.6517	-16.5784	-18.1624	-16.6123	-20.4214
334.5	648.5	11.1394	4.56624	-15.2059	-16.7391	-13.723	-14.8253	-12.8869	-14.6988	-13.7578	-12.485	-16.241	-15.3796	-15.2464	-12.7093	-14.2113	-18.2832	-14.6374	-18.2655	-14.7882	-18.24	-16.7174	-23.3054	-22.0678	-19.8322	-13.864	-12.4013	-16.8824	-14.4046	-17.298	-20.936	-20.4729	-15.2529	-15.7802	-19.5008	-15.9177	-11.3189	-19.2993	-14.4811	-13.8765	-13.2791	-15.4838	-17.3752	-17.0372	-16.2979	-15.442	-20.1259	-15.7007	-17.5739
335.5	648.5	11.1395	4.56624	-13.5418	-15.274	-13.7304	-16.232	-10.9094	-16.0588	-13.6522	-16.7097	-14.0427	-15.1402	-15.094	-12.1165	-13.5499	-16.9256	-17.0753	-18.3604	-13.4751	-19.0964	-15.2966	-19.5373	-20.4088	-20.0957	-17.0854	-13.023	-16.0563	-14.9078	-18.4628	-20.1484	-17.395	-15.7585	-17.0636	-17.8545	-16.3287	-8.29249	-18.1536	-13.5681	-13.9748	-13.3975	-14.238	-14.5584	-16.3489	-15.9826	-16.6032	-19.1203	-16.2204	-14.3251
336.5	648.5	11.1396	4.56624	-11.6802	-13.0961	-13.5823	-18.8782	-12.7328	-18.3501	-12.7769	-17.6679	-14.3362	-13.223	-13.7605	-12.1564	-13.6354	-15.3373	-18.075	-20.0734	-13.1743	-20.9741	-15.5165	-17.425	-16.7079	-18.8812	-15.1024	-16.0085	-15.0468	-15.6305	-18.7802	-18.7634	-14.0878	-16.081	-19.2267	-17.832	-14.9667	-10.1522	-15.2375	-14.4651	-16.9846	-11.5849	-14.9888	-17.1547	-19.1804	-16.0764	-16.9457	-16.1051	-16.7391	-15.0262
337.5	648.5	11.1397	4.56624	-12.0485	-12.1494	-14.0239	-16.8331	-14.2053	-20.6384	-13.7336	-15.4061	-15.8084	-12.2134	-13.0731	-12.9264	-13.2057	-14.4753	-15.3756	-17.3027	-15.758	-19.0456	-17.3507	-17.3051	-16.2166	-20.1053	-14.0842	-18.7606	-16.7821	-14.36	-15.0912	-17.3988	-12.324	-15.3432	-15.8699	-20.2049	-15.3009	-14.7222	-12.8139	-15.5241	-16.7368	-11.2372	-15.0033	-19.1233	-20.365	-17.3022	-15.6591	-15.467	-19.7531	-19.4843
338.5	648.5	11.1398	4.56624	-12.3068	-12.085	-15.8961	-16.4273	-12.6405	-21.1977	-15.1101	-14.2371	-16.5489	-11.2846	-14.4367	-14.322	-12.7277	-14.8678	-15.719	-14.4916	-18.3963	-14.9214	-16.2915	-19.6085	-17.7469	-20.6164	-15.3052	-16.2955	-18.3544	-12.6831	-12.9775	-16.1722	-13.7053	-15.5976	-14.0901	-18.9418	-17.8802	-15.7138	-13.4901	-16.623	-13.6032	-12.9577	-17.01	-15.8241	-17.0322	-19.3122	-15.5432	-16.4037	-21.5822	-19.2528
333.5	649.5	11.1393	4.56616	-13.9656	-18.1179	-14.9061	-14.3723	-16.075	-14.2617	-13.3166	-11.8245	-15.3511	-14.0366	-13.1436	-12.5469	-13.8478	-18.3765	-14.1711	-16.5681	-14.8903	-17.3536	-19.1253	-24.4498	-22.2438	-19	-11.2293	-15.8799	-15.6638	-16.4608	-12.983	-15.4069	-17.3825	-18.2005	-19.4062	-15.6312	-16.4818	-12.3484	-16.6104	-15.124	-14.5218	-18.005	-13.1201	-17.7373	-15.065	-13.5758	-15.0411	-17.8943	-14.589	-27.2318
334.5	649.5	11.1394	4.56616	-15.1947	-16.8682	-14.4617	-15.4293	-12.5147	-16.0529	-17.0903	-13.1742	-17.738	-14.1236	-13.4864	-12.3411	-11.3498	-20.0571	-14.5164	-15.563	-15.8597	-14.4801	-19.1368	-25.387	-23.4637	-19.7449	-13.8937	-13.6069	-14.8069	-16.1797	-15.8337	-17.4539	-19.6551	-16.3844	-17.1063	-17.8821	-15.4133	-9.78211	-16.3159	-16.4461	-14.4624	-15.5786	-13.0187	-17.8603	-15.8817	-16.4967	-16.3343	-19.2779	-15.1788	-21.6297
335.5	649.5	11.1395	4.56615	-14.4603	-14.8384	-13.6033	-16.5778	-10.0904	-16.3366	-17.8443	-15.3738	-15.7207	-13.5869	-13.3992	-12.1959	-11.3108	-16.0751	-16.5745	-15.1832	-14.2691	-15.2663	-18.7919	-22.5086	-22.6858	-18.8855	-17.2278	-13.905	-15.3001	-15.6848	-20.5664	-19.5742	-16.6293	-15.5538	-16.3045	-17.8217	-15.7871	-9.16064	-15.6212	-15.3324	-14.0666	-15.0394	-13.5682	-15.9769	-16.1151	-16.6004	-17.3164	-20.2701	-17.6616	-15.8522
336.5	649.5	11.1396	4.56615	-13.2583	-12.9375	-13.2244	-18.2589	-11.7689	-16.3323	-15.917	-16.5715	-14.3355	-13.139	-13.0249	-12.4085	-12.9466	-13.4564	-16.912	-16.1714	-13.7329	-17.2423	-18.186	-21.0832	-18.5683	-17.9003	-15.7987	-15.2787	-15.7462	-15.0229	-20.1563	-20.5908	-13.1755	-13.9653	-17.8046	-17.8357	-15.869	-12.0312	-15.3227	-13.7061	-15.6037	-13.4737	-14.013	-17.7247	-18.0967	-15.2361	-16.6461	-16.8838	-19.6254	-15.8213
337.5	649.5	11.1397	4.56615	-13.0096	-12.4745	-13.5382	-18.7346	-13.347	-16.0264	-14.7376	-16.4807	-13.6976	-12.7373	-13.799	-13.5459	-14.293	-12.6738	-14.9897	-15.4727	-15.1836	-16.5431	-20.3195	-23.1694	-18.7794	-19.5913	-15.7643	-16.2653	-15.9999	-14.5068	-16.8936	-18.6493	-12.5508	-12.7561	-18.0767	-19.7434	-14.6426	-13.4738	-14.2007	-12.9414	-16.0171	-12.4185	-15.1863	-21.4585	-19.0521	-15.8434	-15.8016	-15.9847	-23.9183	-19.3933
338.5	649.5	11.1398	4.56615	-12.7761	-12.5331	-15.334	-18.4377	-12.9976	-16.3751	-13.2087	-16.1938	-13.5924	-11.6884	-15.1366	-15.8743	-14.2859	-12.8014	-15.4522	-13.9291	-16.9724	-15.0456	-19.783	-24.14	-19.1532	-20.7195	-18.7188	-15.6068	-16.2511	-13.617	-14.378	-15.914	-14.0612	-13.1811	-16.7048	-20.8184	-15.2524	-14.3858	-13.7676	-14.0943	-14.9242	-13.3029	-18.8896	-17.1406	-17.4597	-17.9851	-15.8735	-18.2544	-27.0256	-20.1201
333.5	650.5	11.1393	4.56607	-14.0718	-18.9474	-14.9431	-12.7099	-17.4402	-15.227	-14.3326	-12.7939	-14.7517	-13.3791	-11.9045	-12.1785	-11.9564	-16.0756	-14.1463	-16.0015	-17.2499	-17.0331	-20.0189	-27.9374	-24.1949	-17.311	-13.2289	-17.0053	-15.8968	-18.5756	-12.6506	-17.2483	-15.3846	-18.0648	-15.23	-15.2362	-20.666	-12.0682	-16.2084	-15.5397	-14.269	-16.4687	-13.7496	-15.8998	-13.7508	-14.7169	-15.0246	-19.1512	-13.289	-25.8305
334.5	650.5	11.1394	4.56607	-14.8912	-17.8834	-13.1852	-13.067	-13.5059	-16.1927	-16.7164	-14.2997	-16.3683	-12.6301	-12.5733	-12.8118	-10.4493	-16.4492	-15.9572	-15.7258	-19.0405	-13.7295	-20.9657	-23.5247	-25.7318	-17.0866	-16.6078	-17.5577	-14.5294	-19.2853	-14.5132	-16.8216	-18.5755	-17.1142	-13.8857	-18.3797	-16.1565	-10.0595	-14.4692	-17.1217	-14.9035	-15.0986	-12.3924	-18.4598	-15.0373	-15.8933	-18.3505	-16.7121	-16.2542	-24.0289
335.5	650.5	11.1395	4.56606	-14.322	-15.685	-12.576	-13.5784	-11.3445	-16.2701	-17.1264	-14.4008	-17.1227	-12.9352	-13.4975	-13.8469	-11.0211	-14.9495	-18.3436	-15.5162	-16.3724	-13.7941	-23.4052	-21.0075	-22.6475	-17.5271	-18.0012	-16.2703	-15.7634	-16.2019	-15.8977	-16.8298	-18.04	-15.1798	-13.8882	-18.8608	-15.9872	-11.1994	-12.6201	-15.6441	-14.1614	-13.4709	-12.5955	-18.884	-15.9088	-17.6655	-18.6184	-17.564	-19.7655	-20.2262
336.5	650.5	11.1396	4.56606	-12.8186	-13.8928	-13.9614	-15.1418	-11.276	-15.1327	-16.5317	-14.3706	-15.618	-15.4509	-13.2744	-13.7012	-13.7223	-12.7996	-17.1126	-16.0819	-15.0946	-15.4131	-21.4564	-19.2674	-21.0482	-18.3057	-15.3405	-15.6717	-16.3025	-14.9827	-16.8554	-18.3823	-16.4537	-13.487	-15.1833	-16.651	-16.8028	-12.512	-13.676	-12.4961	-14.6616	-11.3775	-12.4341	-19.5035	-16.8106	-17.6998	-17.1717	-16.5027	-20.1777	-18.9754
337.5	650.5	11.1397	4.56606	-12.0416	-13.7448	-15.5894	-18.4489	-12.2391	-14.4385	-15.2465	-15.3207	-13.5201	-15.892	-12.4037	-13.6037	-16.7246	-11.5237	-15.1676	-16.1594	-15.6591	-16.194	-19.9857	-19.7845	-24.3981	-19.623	-15.6723	-15.7843	-15.9251	-14.9716	-19.3629	-19.1745	-15.7577	-12.5771	-16.4595	-16.2081	-14.2002	-12.6435	-16.1866	-11.8457	-16.5068	-10.9484	-13.6715	-23.3506	-17.4088	-16.3517	-16.3984	-16.3407	-20.6754	-20.0589
338.5	650.5	11.1398	4.56606	-12.2156	-14.0567	-15.8075	-19.9675	-13.8259	-14.3227	-12.895	-17.7553	-13.3238	-13.8561	-12.0846	-14.7804	-17.6154	-11.0786	-16.4617	-15.1933	-17.5845	-16.505	-18.4354	-20.8172	-22.1787	-18.5812	-19.6962	-14.6549	-17.3692	-15.2351	-18.0913	-17.5501	-15.4674	-13.3997	-17.8839	-18.6612	-13.859	-12.6142	-16.3685	-13.2667	-16.3388	-12.6415	-16.5768	-18.2473	-16.5074	-16.7324	-17.1697	-17.8775	-21.8112	-21.0836
245.5	753.5	11.1314	4.55693	-15.6391	-16.4341	-15.2809	-16.1729	-16.0907	-18.0707	-14.9861	-18.2561	-13.8132	-16.0208	-18.499	-14.6695	-11.3602	-15.4713	-16.9712	-18.3442	-19.8132	-17.6844	-20.7149	-17.1513	-18.45	-15.8256	-17.0337	-20.2494	-22.4092	-14.9262	-11.4128	-16.5733	-15.5405	-16.6636	-14.2115	-14.6464	-19.016	-11.5421	-15.2472	-13.7057	-12.3257	-13.0499	-17.052	-14.5987	-16.1291	-18.7403	-15.3299	-16.3018	-14.116	-16.6145
246.5	753.5	11.1315	4.55693	-18.4426	-18.6857	-16.7826	-16.7233	-17.1641	-16.8035	-15.6183	-19.4004	-13.5198	-14.1913	-19.5498	-15.1612	-11.8128	-18.1669	-16.9169	-16.1518	-18.9927	-18.2225	-18.8065	-20.4041	-19.405	-16.4028	-14.7328	-18.4924	-17.2527	-13.7085	-12.8895	-19.0658	-14.2728	-14.9474	-12.9399	-14.4413	-21.8213	-14.7911	-13.9783	-13.0132	-13.161	-14.9694	-19.3675	-13.7369	-16.9537	-18.2571	-14.5454	-18.0932	-16.424	-20.0188
242.5	754.5	11.1311	4.55685	-14.6856	-12.3695	-18.9405	-15.7545	-14.9333	-14.0031	-14.0631	-15.887	-12.7263	-16.9635	-13.1561	-15.0382	-14.0349	-15.2252	-16.0146	-17.0575	-15.3321	-16.2662	-16.2963	-14.6997	-24.0243	-18.6336	-19.4153	-20.7534	-16.2142	-14.0099	-17.0173	-14.7168	-15.8089	-12.8389	-16.5661	-13.9523	-25.8632	-13.4574	-16.4476	-16.715	-16.5299	-16.3828	-15.064	-16.8267	-15.1444	-15.0384	-17.3565	-19.8256	-16.8038	-14.0749
243.5	754.5	11.1312	4.55685	-12.9046	-10.8014	-18.9637	-14.3377	-13.9372	-14.7004	-14.6306	-14.3354	-13.1151	-18.0598	-14.5556	-15.1542	-13.4841	-14.7674	-16.462	-16.3874	-16.5246	-16.0259	-17.3539	-17.805	-23.2056	-17.8983	-21.0985	-16.3318	-15.5546	-13.0476	-18.6995	-13.9386	-14.0343	-12.6963	-17.9505	-14.8393	-22.9477	-12.7589	-16.2467	-15.3386	-14.7637	-15.9127	-15.2476	-16.7299	-14.6856	-17.1768	-16.5603	-16.3744	-20.2568	-17.564
244.5	754.5	11.1313	4.55684	-11.6381	-11.7388	-16.8356	-14.2397	-13.1854	-16.6747	-15.5179	-15.146	-13.9666	-20.8044	-15.8961	-15.5096	-14.1935	-16.2322	-15.3632	-16.7893	-18.1128	-15.2886	-18.193	-20.1476	-22.1122	-20.4567	-18.5992	-16.4038	-18.2084	-13.6539	-15.6381	-15.8949	-16.7381	-13.5922	-18.0259	-16.9147	-21.2452	-11.6299	-15.2993	-14.1316	-13.723	-14.7633	-16.4187	-16.2861	-15.9894	-20.5081	-14.8439	-15.0946	-17.3167	-16.4934
245.5	754.5	11.1314	4.55684	-11.8288	-15.3846	-15.9537	-15.4163	-14.1838	-20.3985	-16.0978	-18.1279	-13.682	-21.8918	-17.1297	-16.2059	-12.0805	-17.503	-14.6191	-16.88	-18.5948	-17.2909	-19.1041	-19.929	-20.3859	-19.0301	-15.1722	-19.1283	-20.7602	-14.1897	-12.7788	-16.9916	-17.0848	-15.1793	-13.6761	-15.2652	-21.674	-12.8058	-14.5327	-12.8718	-12.9006	-17.0786	-19.6531	-15.5099	-17.8373	-18.8666	-14.8082	-14.5941	-14.4242	-14.2007
246.5	754.5	11.1315	4.55684	-14.6473	-17.839	-16.247	-16.1223	-16.1284	-23.4766	-16.7216	-19.142	-14.6606	-15.5037	-17.3512	-16.1878	-12.3109	-17.8983	-14.9363	-15.7902	-18.2753	-19.5085	-17.4833	-20.9872	-18.5701	-17.4783	-13.5043	-19.1829	-17.9077	-12.7312	-14.1105	-17.4012	-14.1895	-14.928	-12.33	-16.232	-21.0131	-16.3532	-14.715	-13.4425	-13.5949	-18.0918	-19.8151	-14.683	-20.7753	-18.2707	-14.6527	-16.6247	-16.5445	-17.2828
241.5	755.5	11.131	4.55676	-13.6421	-17.1481	-16.0103	-15.2109	-18.2125	-15.2657	-15.9059	-15.7572	-13.4181	-19.8911	-12.1267	-14.0985	-13.9597	-18.7981	-15.9946	-15.0984	-14.1738	-17.5241	-16.9713	-15.5026	-16.6363	-18.1832	-19.3873	-16.6801	-19.3021	-15.2708	-18.3927	-15.9335	-15.1877	-15.3146	-16.5194	-16.4587	-21.2581	-15.8689	-18.2283	-14.8611	-19.2273	-17.0022	-22.1285	-15.6369	-16.2403	-15.5247	-16.9384	-21.9607	-19.3879	-16.0389
242.5	755.5	11.1311	4.55676	-14.1205	-15.4319	-17.5196	-16.0884	-18.7309	-14.9363	-14.3255	-16.1759	-12.4171	-18.9858	-11.8682	-13.0077	-13.9093	-16.9913	-16.8451	-18.9794	-13.7808	-15.6708	-17.223	-15.6889	-16.7622	-19.5594	-24.6143	-20.3292	-18.8474	-13.4264	-18.3196	-14.1806	-15.3554	-13.216	-15.0006	-16.717	-20.5641	-15.5331	-16.3279	-14.7174	-18.8073	-17.41	-17.8322	-15.31	-17.6137	-15.1897	-19.6316	-18.7768	-18.8003	-17.0685
243.5	755.5	11.1312	4.55676	-12.5428	-13.108	-18.9014	-14.2468	-16.2841	-14.1848	-14.5148	-14.6809	-12.0526	-17.8078	-14.355	-13.3978	-13.6205	-18.5252	-17.3427	-19.4806	-16.2468	-17.3255	-16.93	-19.2494	-18.6614	-21.0437	-23.5852	-16.9298	-18.1526	-12.3237	-17.4593	-13.4406	-13.9233	-12.1858	-15.4859	-16.3454	-18.7397	-14.5851	-14.8657	-14.5703	-15.1708	-16.6998	-15.5208	-14.8857	-16.826	-15.3724	-18.1014	-15.6883	-18.131	-19.5814
244.5	755.5	11.1313	4.55675	-11.5825	-13.1109	-15.9663	-14.4078	-13.738	-15.3383	-15.2796	-15.5208	-12.3892	-18.5509	-16.5968	-17.0631	-16.0247	-19.8437	-16.6223	-17.8522	-17.4548	-18.5338	-16.4064	-23.617	-21.3169	-21.6743	-19.0562	-15.4956	-18.3249	-12.2325	-17.3872	-15.5484	-15.7496	-12.2438	-17.2968	-15.8343	-19.0868	-13.2804	-14.4902	-13.2655	-14.5606	-16.8628	-15.7247	-15.0151	-17.478	-16.4672	-15.7801	-15.6145	-16.7594	-18.6311
245.5	755.5	11.1314	4.55675	-11.5548	-14.6777	-14.3344	-16.0299	-12.9463	-18.106	-16.01	-18.173	-12.8993	-19.3789	-17.0699	-18.5824	-15.3845	-18.8365	-15.8294	-16.5752	-16.4278	-18.8596	-17.1291	-19.7388	-23.3287	-18.148	-16.3739	-16.042	-18.3869	-12.5945	-16.4824	-16.8431	-19.2177	-12.9489	-14.9487	-15.5261	-20.0796	-13.6191	-14.3037	-11.927	-14.709	-18.4177	-17.5483	-17.5402	-17.936	-16.6803	-16.7773	-17.8406	-15.6251	-17.1029
246.5	755.5	11.1315	4.55675	-14.0052	-16.6038	-14.5135	-16.6315	-14.2866	-21.1607	-16.3589	-17.7686	-14.6417	-15.753	-15.7001	-17.9924	-15.5277	-19.2984	-15.8929	-16.1823	-16.7143	-19.6554	-16.8494	-17.0596	-20.9348	-17.4627	-14.7439	-18.1946	-19.5349	-12.7509	-16.6868	-17.2633	-18.3997	-14.1007	-13.4662	-17.779	-15.8358	-15.5658	-14.4723	-13.5377	-15.5021	-18.6865	-17.8334	-17.5985	-18.4677	-17.7725	-17.8448	-18.7168	-17.8233	-19.054
247.5	755.5	11.1315	4.55675	-16.9443	-18.6488	-15.431	-15.2716	-15.4628	-21.6853	-16.7601	-19.2268	-18.2605	-13.2415	-14.2848	-19.3083	-18.1748	-20.567	-16.5547	-15.4803	-20.6223	-17.031	-17.6243	-17.765	-18.7143	-17.7228	-15.1519	-17.0149	-20.5886	-12.8823	-18.3394	-18.8798	-19.7637	-16.0082	-12.716	-20.2807	-14.0464	-17.0257	-14.5161	-16.5034	-18.1196	-14.7103	-15.2502	-15.4359	-21.4867	-19.6889	-17.8266	-16.2043	-24.4441	-19.6
242.5	756.5	11.1311	4.55667	-16.3813	-16.9385	-16.4395	-17.4994	-20.6184	-15.856	-15.9045	-19.3278	-14.6706	-17.8647	-13.1167	-13.642	-13.2147	-15.775	-16.5326	-17.2543	-14.2825	-16.1207	-17.864	-16.9018	-14.9375	-17.7485	-21.5169	-19.6473	-18.2693	-15.125	-19.9218	-15.9405	-16.5429	-14.9732	-15.2497	-17.3278	-16.9381	-17.7867	-19.2242	-16.1725	-18.7273	-18.5441	-19.2668	-15.7338	-20.1667	-15.3695	-23.1386	-17.5456	-21.2034	-19.9015
243.5	756.5	11.1312	4.55667	-14.8277	-17.1249	-17.0273	-15.9889	-20.6245	-14.8342	-16.3445	-16.0526	-13.4475	-17.8061	-15.8635	-13.413	-14.9527	-24.4254	-15.0795	-19.2409	-17.744	-17.6732	-16.3076	-21.8088	-17.3463	-19.5868	-21.7955	-18.5545	-15.7919	-14.9536	-17.2587	-15.4606	-14.9035	-14.3574	-15.6564	-16.3353	-15.8407	-15.6406	-15.942	-15.319	-15.0902	-15.2793	-14.3829	-14.91	-20.8594	-14.5505	-22.2	-15.4463	-17.7784	-23.8866
244.5	756.5	11.1313	4.55667	-13.5582	-16.6546	-14.9809	-15.5954	-15.4119	-15.4158	-16.4159	-17.1208	-12.6926	-18.6741	-17.2621	-17.494	-20.1971	-20.4259	-14.8032	-19.8471	-20.4556	-21.0425	-15.7995	-22.5501	-20.7843	-18.4669	-20.127	-16.3884	-14.8724	-13.8257	-18.8762	-16.443	-15.6955	-13.5648	-17.0672	-14.8616	-17.7934	-12.5771	-15.8387	-13.2953	-15.6134	-15.6045	-12.4169	-13.8577	-21.6612	-14.637	-19.1314	-17.2945	-17.0629	-25.4346
245.5	756.5	11.1314	4.55666	-13.4215	-14.7054	-14.3496	-16.17	-13.039	-16.1757	-16.0412	-18.9359	-12.6362	-18.8926	-17.7213	-16.614	-20.7457	-17.8666	-16.3827	-19.2799	-16.9996	-21.6231	-17.4974	-19.2451	-19.0703	-16.273	-19.4037	-15.807	-16.3113	-12.8783	-25.0126	-17.8973	-16.7233	-12.2374	-16.0823	-15.4153	-19.7708	-11.335	-15.3998	-11.6988	-17.8581	-15.9951	-14.0589	-13.4888	-19.5651	-15.0361	-21.0623	-21.009	-17.1486	-24.7868
246.5	756.5	11.1315	4.55666	-16.3319	-15.4079	-14.8751	-15.2866	-13.7267	-16.2333	-15.4517	-16.8708	-13.1988	-16.6605	-17.5814	-17.4678	-19.3523	-20.2636	-17.9132	-17.4887	-17.3549	-19.6322	-17.8033	-17.2223	-17.8175	-16.5572	-17.8308	-16.6319	-20.192	-13.3343	-19.4555	-19.4354	-17.365	-12.8442	-15.0205	-18.4264	-13.7773	-13.3949	-15.0556	-12.935	-18.7693	-14.8581	-15.8568	-14.343	-16.9954	-15.7813	-19.9383	-20.4121	-18.7747	-21.8497
247.5	756.5	11.1315	4.55666	-16.88	-17.6744	-16.5347	-15.6147	-17.72	-16.7232	-16.185	-16.4687	-15.9734	-13.7745	-14.1336	-19.9902	-17.5734	-18.4235	-17.1525	-15.3797	-20.527	-16.6248	-18.0793	-17.4075	-18.9393	-17.7277	-17.792	-17.389	-21.0246	-14.6919	-18.4682	-21.0826	-18.8548	-15.266	-13.8041	-22.3664	-12.2705	-15.4082	-15.8523	-15.7343	-20.6957	-12.8895	-15.3436	-14.2813	-17.6169	-16.086	-16.9946	-16.8832	-19.1684	-17.2288
242.5	757.5	11.1311	4.55658	-18.8517	-15.6675	-15.1692	-16.9478	-17.2215	-16.8352	-17.9199	-14.132	-15.2431	-17.4477	-14.9231	-16.7138	-13.0974	-15.4075	-16.3988	-14.0146	-15.8054	-17.7251	-16.8195	-15.8145	-17.0199	-15.9335	-16.7537	-20.0219	-19.4406	-15.8393	-19.3794	-20.4056	-16.171	-15.4094	-17.7847	-16.038	-14.7433	-17.7103	-21.3517	-18.905	-15.4277	-17.0893	-18.5697	-17.4953	-17.6782	-15.689	-19.8847	-19.2823	-22.074	-16.7527
243.5	757.5	11.1312	4.55658	-18.0111	-17.2614	-15.4739	-16.467	-19.1895	-18.3571	-17.4603	-13.7488	-15.386	-16.6936	-15.6426	-15.295	-15.1996	-20.8356	-13.961	-16.6118	-19.1902	-18.4409	-17.4367	-17.1427	-21.312	-18.3938	-17.656	-18.2332	-16.4942	-16.832	-18.6936	-18.5557	-14.7298	-16.6883	-19.0913	-15.0212	-14.1113	-14.3531	-16.7185	-16.9545	-15.5041	-15.871	-14.8755	-16.4559	-19.5661	-15.1913	-20.2993	-17.7737	-17.5754	-19.4697
244.5	757.5	11.1313	4.55658	-15.3585	-18.0666	-15.1665	-15.5074	-15.453	-19.1901	-15.6428	-16.8766	-13.8139	-18.8213	-15.8911	-15.2602	-20.8676	-20.9745	-14.9615	-18.2188	-25.3107	-21.3419	-16.3719	-19.4708	-23.1845	-16.5783	-18.765	-16.8437	-14.1809	-16.1636	-20.4863	-18.7244	-15.5106	-16.842	-22.9788	-14.5901	-16.0233	-11.5222	-16.0676	-13.0013	-17.7391	-16.3923	-12.9198	-16.2366	-21.9224	-15.3538	-20.0342	-19.6357	-16.5073	-29.2783
245.5	757.5	11.1314	4.55657	-14.0093	-16.1593	-16.1364	-14.8957	-14.1574	-17.5026	-15.195	-18.1433	-12.8819	-18.7866	-15.3824	-14.4666	-20.8038	-19.4705	-16.9954	-17.74	-20.3946	-20.5997	-16.5057	-19.9555	-18.7769	-15.5116	-20.2284	-17.0684	-15.0958	-14.7423	-23.2908	-19.0119	-15.0853	-14.0691	-20.2008	-15.3375	-19.1567	-12.1664	-16.2109	-11.3288	-21.2977	-15.6643	-13.7377	-14.2633	-21.8584	-17.5887	-20.9588	-23.8684	-17.1161	-21.4598
246.5	757.5	11.1315	4.55657	-16.2535	-16.785	-18.676	-13.8315	-15.8754	-15.6351	-15.2485	-15.8611	-12.3206	-17.6564	-17.8157	-16.3554	-17.3866	-19.2729	-17.3894	-18.0099	-21.1107	-18.391	-18.2394	-18.7158	-17.6024	-16.7677	-18.4547	-17.3866	-19.2245	-14.9897	-20.2888	-19.6092	-15.68	-13.5374	-19.0804	-16.1189	-16.0992	-15.5056	-15.4211	-14.0891	-19.8542	-11.7324	-15.1021	-12.5856	-17.934	-16.5907	-17.5015	-19.8935	-17.553	-17.8738
247.5	757.5	11.1315	4.55657	-16.0244	-16.3215	-20.079	-15.0406	-19.8207	-14.868	-16.014	-14.2477	-13.596	-15.153	-16.002	-18.9129	-15.8983	-15.6358	-16.4757	-15.9412	-21.9157	-17.0473	-18.2591	-19.7433	-19.797	-17.5613	-18.735	-18.593	-20.7265	-15.3825	-20.8421	-19.5058	-16.8675	-14.7712	-15.8579	-19.3193	-13.1534	-16.227	-16.8223	-15.5123	-18.0486	-11.8856	-15.8564	-12.9172	-15.4755	-14.9637	-13.7354	-16.4342	-17.8741	-17.1
242.5	758.5	11.1311	4.55649	-16.8114	-14.2236	-13.866	-16.3551	-14.784	-16.7541	-18.1941	-12.6557	-13.4123	-13.8598	-14.3894	-18.2762	-13.1974	-17.3895	-17.4295	-13.396	-14.6904	-17.3679	-17.4586	-15.9811	-17.374	-17.1794	-15.0085	-20.5792	-20.1001	-14.1565	-19.264	-19.6363	-15.7322	-15.1467	-19.8085	-15.9536	-13.9289	-16.6542	-18.5198	-19.1106	-12.3785	-17.3438	-18.1057	-17.7503	-15.546	-16.3918	-18.9544	-20.094	-20.787	-15.7379
243.5	758.5	11.1312	4.55649	-17.0081	-15.597	-15.4318	-15.3877	-15.7397	-19.2176	-17.2867	-12.9412	-15.4557	-14.1981	-13.9513	-17.1565	-13.7827	-21.0675	-16.2579	-15.5673	-16.7959	-16.4799	-20.1801	-15.5646	-20.4889	-22.291	-17.4571	-18.7781	-18.8462	-14.937	-17.7639	-17.6884	-13.0666	-15.892	-19.2115	-16.0469	-13.3092	-14.0685	-18.0195	-16.9475	-15.2081	-18.2027	-16.0504	-16.6296	-17.2094	-15.5605	-19.2042	-19.2997	-16.7441	-17.6958
244.5	758.5	11.1313	4.55649	-14.6541	-16.3829	-15.8562	-15.6566	-15.1162	-21.6558	-15.4084	-15.7896	-15.0713	-16.4802	-14.9872	-14.6459	-16.0799	-19.5942	-19.2184	-17.831	-18.1726	-17.5553	-18.1246	-18.9139	-20.4237	-17.3783	-16.5581	-17.5343	-16.1142	-15.6683	-18.8839	-20.3555	-14.3016	-13.5975	-20.1279	-16.2045	-15.3083	-13.5024	-17.5871	-13.1965	-18.0993	-17.6988	-14.874	-17.6583	-18.546	-15.0872	-19.0208	-18.7016	-15.4584	-22.1126
245.5	758.5	11.1314	4.55649	-12.8156	-16.7318	-16.6476	-16.0559	-14.8076	-18.9364	-14.5074	-17.1089	-13.6694	-18.4553	-14.823	-13.4678	-16.2422	-16.7439	-20.698	-17.6965	-17.8596	-17.855	-16.0321	-20.0179	-19.9001	-15.3239	-15.8429	-17.3741	-15.7516	-15.0012	-20.1523	-19.1034	-15.8139	-13.1982	-20.6993	-15.2006	-17.9022	-15.6456	-16.8392	-11.8323	-19.5759	-15.2664	-14.7694	-19.202	-18.4276	-15.7745	-19.4068	-20.327	-15.8121	-18.5941
246.5	758.5	11.1315	4.55648	-13.9272	-16.7908	-19.7885	-15.5204	-16.3345	-17.4856	-15.2849	-15.4283	-12.7027	-17.0044	-16.4324	-15.058	-15.0459	-15.1771	-17.8041	-18.6481	-22.9526	-18.2819	-17.5442	-17.4333	-20.4011	-17.5846	-15.5338	-17.0504	-18.8662	-16.1714	-20.1255	-19.1395	-17.5371	-14.0986	-19.8865	-14.3917	-15.7899	-15.9026	-15.6363	-15.3803	-21.049	-11.8375	-15.3119	-13.8359	-15.7152	-16.33	-16.693	-21.302	-16.9121	-18.7681
247.5	758.5	11.1315	4.55648	-15.2662	-15.9962	-21.7178	-15.923	-19.3535	-17.1809	-16.3222	-16.0536	-13.4625	-16.0262	-17.637	-17.3063	-14.8035	-14.383	-17.7312	-17.2733	-20.3173	-19.0751	-17.0971	-18.7908	-22.2891	-19.4819	-16.3642	-18.8501	-21.545	-16.599	-22.2634	-18.5975	-16.7676	-15.3185	-16.692	-14.7257	-13.1318	-18.8508	-17.1406	-15.1993	-16.6503	-12.1681	-16.2122	-13.4422	-14.5032	-15.5105	-13.9248	-16.1673	-20.6215	-19.5649
242.5	759.5	11.1311	4.5564	-13.7782	-15.0031	-14.2134	-13.8714	-13.2629	-15.2911	-17.5184	-13.5778	-14.5357	-13.7666	-14.0998	-18.5262	-13.3817	-19.6299	-20.2502	-15.6333	-13.514	-14.6795	-19.6002	-15.1614	-15.0993	-21.8422	-15.755	-19.2181	-15.5064	-13.7921	-20.1805	-17.5107	-15.0378	-15.5411	-18.3203	-16.7614	-14.2794	-16.2447	-16.0762	-17.7564	-11.836	-16.9677	-18.967	-15.3584	-15.883	-15.6371	-17.2778	-16.9427	-20.3889	-18.9493
243.5	759.5	11.1312	4.5564	-14.0968	-15.3996	-16.0557	-15.0858	-14.2994	-16.5442	-17.5821	-15.4675	-15.3125	-13.8512	-13.0723	-19.1536	-12.9802	-20.0509	-22.3865	-17.1583	-15.4886	-13.7444	-21.1462	-14.9976	-15.839	-22.7708	-20.0063	-17.7613	-15.3674	-14.9051	-17.5501	-17.1499	-12.6301	-14.3671	-19.1782	-19.6292	-13.2646	-14.5758	-17.136	-16.9762	-14.4732	-17.4948	-18.4305	-15.7603	-19.2419	-15.3611	-16.7578	-17.5251	-17.8382	-18.9267
244.5	759.5	11.1313	4.5564	-13.6132	-15.0505	-16.3543	-17.2199	-15.2849	-18.5944	-16.4708	-18.062	-15.9792	-15.8776	-14.4981	-16.9836	-13.9231	-17.3735	-24.9359	-17.9782	-15.5251	-14.3215	-19.5663	-16.9024	-15.3971	-17.0856	-16.6244	-18.1585	-15.3667	-15.9989	-18.2849	-20.115	-14.3719	-11.3123	-18.4214	-19.4372	-15.424	-15.3584	-18.5327	-14.4314	-15.5688	-16.2344	-17.2389	-17.0216	-19.3584	-14.6502	-18.4539	-17.6267	-15.8883	-20.0142
289.5	776.5	11.1353	4.55483	-11.6251	-18.5027	-18.9124	-15.3741	-10.7764	-14.214	-18.4994	-17.1242	-14.3085	-15.7813	-13.8364	-18.3345	-14.2824	-15.3395	-18.9601	-15.2948	-14.024	-16.4667	-12.699	-15.3528	-17.2639	-20.9088	-17.6067	-16.8765	-16.1121	-17.6931	-17.7952	-15.1474	-14.4986	-14.8361	-17.8438	-18.4184	-12.4781	-17.5119	-16.9342	-15.0602	-13.738	-10.0039	-16.3013	-13.9289	-14.1594	-14.0436	-17.9843	-14.3324	-17.5145	-13.7767
286.5	777.5	11.135	4.55474	-12.5827	-16.6513	-16.766	-15.6597	-12.9478	-14.4738	-13.3834	-19.2469	-13.9322	-16.7351	-14.4606	-15.2918	-16.1138	-16.3896	-17.036	-13.9773	-15.0766	-13.6743	-16.8602	-17.7261	-17.4417	-12.2929	-12.8352	-14.9251	-15.924	-20.0119	-15.1061	-13.061	-16.745	-14.1681	-19.9179	-17.192	-15.7869	-13.6646	-14.1789	-18.0233	-14.2922	-14.9852	-17.9368	-15.0878	-15.2869	-16.3865	-20.2655	-17.189	-16.9886	-19.8737
287.5	777.5	11.1351	4.55474	-12.2229	-16.6479	-17.6551	-15.3377	-11.8133	-12.2271	-15.7056	-18.8858	-14.4636	-16.4587	-13.2512	-15.336	-15.6727	-16.4965	-18.9397	-15.0477	-16.8025	-14.5181	-15.0618	-22.0055	-16.2257	-15.0447	-16.2784	-15.1186	-14.322	-20.3367	-15.7174	-12.9726	-17.214	-15.832	-19.4823	-17.9656	-12.7925	-16.3936	-16.1294	-16.0153	-15.7358	-11.5172	-16.1154	-13.2439	-15.6717	-16.18	-16.8646	-17.8717	-15.8491	-20.3263
288.5	777.5	11.1352	4.55474	-11.6815	-17.7489	-18.5902	-16.0919	-10.9372	-12.3254	-18.6936	-18.6829	-14.8625	-14.9787	-13.9842	-15.2319	-15.4641	-18.343	-19.5137	-14.8861	-17.1954	-15.2942	-14.8873	-18.6439	-16.2429	-16.2561	-18.9776	-15.9134	-13.7607	-18.9685	-13.9701	-13.0768	-16.2289	-15.6965	-18.9635	-17.3889	-11.7377	-19.9374	-18.5467	-14.9582	-15.5381	-8.79229	-15.5029	-12.2196	-14.7584	-15.1246	-15.7408	-14.5487	-15.7789	-15.4059
289.5	777.5	11.1353	4.55474	-11.7597	-20.7359	-19.537	-16.9142	-10.7398	-14.783	-19.1127	-17.599	-14.6856	-16.3581	-14.9113	-17.2869	-14.6947	-19.0516	-18.0298	-15.7248	-16.2743	-16.7523	-14.695	-15.3492	-17.0708	-17.3051	-18.1181	-17.6948	-14.0929	-19.1027	-14.8925	-14.4137	-16.461	-13.939	-16.8807	-16.6714	-13.2274	-18.2767	-18.8674	-16.213	-13.7796	-9.66712	-15.9989	-12.4808	-14.6279	-14.1799	-16.6534	-13.2796	-16.389	-12.6527
283.5	778.5	11.1347	4.55466	-11.4823	-18.0372	-17.7671	-16.6384	-11.7796	-15.8777	-16.4243	-16.682	-12.8504	-16.2058	-14.6455	-15.4893	-14.7375	-15.1532	-13.8722	-18.8947	-14.5907	-13.6391	-17.4636	-17.6127	-16.566	-16.133	-15.5062	-14.5474	-20.6034	-24.238	-13.6509	-16.711	-16.6425	-19.5893	-22.2211	-17.5253	-17.2009	-12.8619	-18.0075	-19.4808	-17.5291	-14.6739	-19.7343	-16.587	-13.5485	-15.7563	-17.7478	-16.9581	-16.0221	-9.4877
284.5	778.5	11.1348	4.55465	-11.3896	-16.548	-17.6275	-15.1174	-13.5621	-15.0435	-15.1367	-17.7635	-12.9404	-17.933	-15.5801	-14.8583	-14.1571	-15.4321	-14.6104	-17.8462	-14.4793	-13.5064	-16.4654	-17.2504	-16.2655	-13.9217	-13.9807	-15.4675	-20.432	-21.9971	-13.4339	-14.9098	-16.8181	-18.2671	-20.2259	-16.9414	-18.3489	-14.3572	-18.7921	-21.4624	-18.1055	-14.5107	-19.865	-18.2727	-15.2249	-17.2142	-20.1184	-20.3877	-19.1662	-11.6015
285.5	778.5	11.1349	4.55465	-13.0937	-16.5991	-16.3082	-14.6042	-15.3704	-15.1119	-14.3252	-19.5923	-14.2736	-16.7322	-15.7439	-15.4532	-13.3812	-15.4778	-15.8496	-14.6085	-13.3286	-14.0341	-17.8694	-17.2494	-16.961	-12.364	-12.9124	-16.6899	-18.6747	-21.836	-11.0574	-14.4702	-15.8063	-14.9492	-18.9549	-17.212	-20.5795	-13.4837	-17.2595	-21.4431	-17.4875	-15.7299	-17.9546	-17.0228	-17.0482	-15.6386	-19.6335	-21.4418	-19.4279	-15.3305
286.5	778.5	11.135	4.55465	-14.7616	-16.5625	-16.6014	-14.7167	-14.9846	-14.6249	-14.8991	-20.18	-15.0197	-15.4014	-15.0349	-17.1821	-13.6723	-15.2891	-17.8878	-13.7189	-13.4356	-15.7673	-18.9314	-19.5262	-17.1793	-12.7206	-13.6149	-17.8498	-17.5318	-21.3583	-11.6394	-14.3535	-16.3045	-14.4973	-19.9429	-16.7493	-17.4472	-14.5569	-16.3847	-17.9225	-17.0957	-15.0519	-15.4362	-15.1817	-19.4846	-14.7834	-16.5164	-20.7406	-16.8985	-19.0712
287.5	778.5	11.1351	4.55465	-14.1312	-16.6671	-17.5407	-15.0841	-12.9974	-13.5313	-16.3337	-19.1325	-15.3546	-15.2513	-14.757	-17.0986	-15.1964	-16.9251	-18.4441	-15.7589	-15.2871	-15.3227	-16.7864	-21.2996	-16.7856	-13.105	-16.9981	-18.9921	-15.8573	-21.3863	-14.3701	-13.7574	-17.9163	-16.0173	-21.5141	-16.1709	-12.7668	-16.9138	-16.4559	-17.5705	-16.8865	-10.748	-14.0619	-12.8776	-18.3421	-14.4171	-14.4931	-17.2992	-14.9562	-20.7946
288.5	778.5	11.1352	4.55465	-12.5667	-19.3419	-19.0022	-16.4512	-11.8568	-14.1011	-16.6244	-18.8211	-14.5351	-14.9039	-14.427	-15.6707	-15.8046	-19.3696	-19.4485	-16.8777	-18.1668	-14.6994	-16.0916	-18.2933	-17.174	-12.9457	-17.2724	-17.7342	-14.9113	-24.6784	-13.3997	-13.903	-17.0234	-13.8874	-19.4069	-14.3612	-11.6417	-15.8799	-17.2342	-17.8864	-16.4829	-8.4161	-13.6243	-11.2905	-14.9874	-14.9082	-14.4469	-13.656	-14.2813	-16.7508
289.5	778.5	11.1353	4.55465	-11.952	-22.9037	-20.8894	-18.3176	-11.7767	-15.7014	-16.4468	-19.7722	-14.1282	-16.4808	-12.4908	-15.9039	-15.6917	-20.1122	-17.778	-16.5655	-18.4512	-19.2016	-16.1222	-16.0434	-18.7108	-14.5341	-16.0713	-17.6476	-13.7703	-22.6915	-14.0036	-15.2137	-17.6993	-12.7042	-16.7343	-14.9073	-13.9762	-16.0418	-18.3129	-17.9057	-13.7758	-10.079	-13.9803	-11.1702	-14.8232	-16.222	-16.1369	-13.6397	-15.0732	-14.312
284.5	779.5	11.1348	4.55456	-11.1525	-15.4677	-16.7658	-15.1275	-16.0724	-13.7092	-18.0094	-16.2315	-13.6471	-16.5864	-14.6178	-14.9164	-13.2283	-16.6876	-15.5964	-16.6703	-16.412	-13.3495	-19.0822	-20.9614	-17.966	-17.2083	-14.3996	-17.4863	-19.5102	-22.4378	-11.579	-14.2299	-18.7576	-16.1694	-17.3722	-15.2934	-16.2983	-13.8673	-15.7532	-21.7184	-22.3381	-16.169	-19.0906	-17.6223	-15.5449	-16.9862	-15.5685	-17.3266	-20.2701	-14.9724
285.5	779.5	11.1349	4.55456	-13.5744	-15.0977	-16.3755	-14.9568	-18.421	-14.2483	-16.6399	-16.1792	-15.041	-15.8845	-16.1086	-16.5184	-13.2892	-16.3151	-16.6704	-13.7796	-14.4273	-13.1581	-17.8703	-17.938	-18.9341	-15.1566	-14.7071	-19.1443	-17.3323	-21.0449	-10.3165	-16.0973	-16.9165	-15.4054	-14.494	-17.146	-18.713	-13.4042	-16.1409	-20.4958	-19.2265	-15.6	-14.8305	-17.77	-16.5928	-14.6341	-16.1973	-21.3155	-20.7663	-16.0608
286.5	779.5	11.135	4.55456	-14.5251	-16.0446	-17.472	-15.6013	-15.2935	-15.4746	-16.6994	-16.7886	-15.3905	-15.2593	-16.9082	-19.6349	-14.2276	-18.8434	-17.8543	-13.72	-15.2033	-16.4785	-17.8861	-17.2602	-18.2009	-14.9391	-15.956	-18.2463	-16.8124	-19.0711	-11.2014	-15.9413	-15.8073	-15.4021	-14.6563	-15.0754	-18.2709	-15.1357	-15.3636	-18.2676	-15.2256	-12.8723	-11.6564	-15.9222	-16.5048	-13.9039	-16.3146	-21.6432	-18.5573	-17.012
287.5	779.5	11.1351	4.55456	-12.9732	-16.8784	-17.3556	-16.3621	-13.6707	-16.3108	-17.2317	-17.5324	-15.2686	-15.3334	-17.5595	-20.8906	-16.0098	-19.7452	-17.7483	-15.6563	-16.9842	-18.026	-16.9608	-16.9164	-17.7761	-15.1568	-17.1915	-17.6242	-16.9969	-21.1026	-13.9176	-14.2413	-17.5857	-14.6235	-19.2744	-13.4085	-13.6217	-15.4203	-14.1851	-17.5997	-15.076	-9.63947	-11.7439	-12.7983	-14.792	-14.2886	-14.0679	-16.4499	-14.9321	-18.0667
288.5	779.5	11.1352	4.55456	-11.6923	-19.9642	-18.2611	-17.3772	-13.5131	-16.3633	-16.9297	-18.1747	-13.879	-15.2527	-14.1385	-18.154	-17.2184	-18.4055	-20.6672	-16.8962	-18.531	-15.0275	-15.658	-17.1613	-18.4446	-14.9944	-16.3348	-16.5563	-19.1154	-27.7107	-14.5384	-13.9238	-17.4169	-13.2029	-18.3312	-13.4212	-13.2202	-14.3927	-14.8023	-15.609	-14.6474	-9.62521	-13.0773	-11.5091	-13.906	-16.2176	-14.3863	-13.4916	-13.7026	-15.2217
289.5	779.5	11.1353	4.55456	-11.1854	-20.0897	-19.6271	-19.2115	-14.0786	-16.1526	-15.9749	-21.2662	-12.3244	-15.5033	-10.7846	-15.9741	-18.2847	-17.7266	-20.6439	-15.9447	-17.506	-17.7197	-15.5289	-17.8061	-19.9139	-14.9428	-15.4235	-15.7496	-15.9005	-21.2828	-15.0896	-14.9961	-18.2689	-12.6435	-16.7599	-15.7429	-15.8883	-16.2508	-16.1789	-14.2833	-13.4297	-11.9069	-13.1833	-12.1291	-13.4405	-18.8308	-16.7492	-13.0684	-14.1598	-12.2422
284.5	780.5	11.1348	4.55448	-14.1274	-15.7776	-17.3272	-14.9585	-16.6703	-13.432	-16.0419	-17.4883	-15.2805	-16.3627	-13.0617	-14.4574	-14.6954	-16.8744	-16.8598	-14.9166	-18.5408	-12.8014	-17.9556	-20.7493	-19.531	-19.1711	-15.2982	-18.6413	-16.3609	-16.6164	-12.4175	-15.4762	-19.1744	-14.2271	-16.5452	-16.4995	-18.626	-12.1225	-12.3287	-16.1252	-19.0379	-14.651	-19.0966	-18.6568	-15.6615	-14.3006	-13.8801	-14.6785	-18.6635	-19.0029
285.5	780.5	11.1349	4.55447	-15.0784	-15.275	-18.6606	-15.8361	-16.8294	-14.3295	-15.4252	-16.8489	-17.245	-17.2365	-16.8167	-15.5095	-15.9397	-16.2615	-18.6946	-12.4167	-16.0885	-11.7407	-16.0471	-19.194	-19.4318	-17.0849	-15.8199	-20.7162	-15.5491	-16.6817	-12.4941	-17.1501	-15.7263	-14.7617	-12.2732	-17.9446	-20.8428	-13.9207	-11.4709	-16.6485	-16.8846	-12.7259	-13.8464	-19.0988	-15.8088	-13.4852	-15.4115	-16.0905	-20.9819	-17.4563
286.5	780.5	11.135	4.55447	-12.3897	-16.3241	-19.9411	-17.6517	-14.5313	-16.4647	-15.236	-16.79	-16.0628	-16.8149	-20.668	-19.0306	-17.9054	-17.2377	-18.0857	-12.6277	-17.2151	-15.8123	-15.5031	-17.8729	-19.5298	-16.2931	-16.263	-19.0232	-15.163	-16.9316	-13.2478	-16.9033	-14.4372	-14.5912	-12.0187	-14.0476	-16.8019	-14.7695	-10.7946	-16.5816	-13.718	-10.06	-11.1727	-18.2315	-13.0962	-14.2379	-17.6899	-17.4076	-18.94	-16.3752
287.5	780.5	11.1351	4.55447	-10.2218	-17.8405	-19.1944	-18.4124	-13.3999	-19.4929	-14.9216	-17.7763	-16.5353	-16.3226	-18.1825	-22.4981	-18.6899	-17.2526	-18.2002	-13.5851	-19.4454	-19.3818	-15.9109	-16.6997	-18.2979	-17.6656	-16.8909	-17.8729	-16.5268	-17.6856	-13.9968	-15.6	-16.2243	-13.8597	-14.616	-12.0619	-14.1062	-14.0266	-12.003	-14.1849	-11.9128	-9.06552	-11.5254	-14.843	-11.7652	-16.523	-15.1847	-15.8352	-15.4459	-14.8642
288.5	780.5	11.1352	4.55447	-10.3279	-19.2767	-18.7473	-17.4833	-14.4416	-18.9424	-14.4755	-19.0598	-14.7769	-15.6712	-14.2895	-18.208	-18.2176	-15.7812	-20.7355	-13.7075	-18.702	-15.6087	-16.2263	-17.1467	-19.011	-18.036	-17.8587	-16.2356	-18.7777	-18.0311	-14.8013	-15.7288	-17.928	-12.9293	-16.1514	-13.7618	-14.8834	-13.9127	-14.151	-11.8959	-11.5776	-10.285	-12.6844	-13.6787	-11.5089	-18.6159	-14.9811	-14.1803	-14.7227	-13.4116
289.5	780.5	11.1353	4.55447	-11.0379	-20.562	-18.3837	-17.1753	-17.9903	-16.4282	-15.4416	-22.7104	-12.661	-15.5286	-11.9856	-15.6936	-18.5003	-14.9937	-21.1518	-13.5964	-16.4664	-16.4758	-16.5017	-18.7295	-19.379	-15.9534	-16.601	-15.2371	-17.819	-16.6054	-16.5278	-16.8191	-19.6026	-12.5181	-16.5604	-15.7606	-17.8835	-15.3931	-15.5112	-10.9906	-11.9393	-13.0032	-13.2105	-14.106	-11.2431	-18.7275	-16.7706	-13.7307	-14.7805	-12.4094
290.5	780.5	11.1354	4.55447	-12.3188	-20.6048	-19.2719	-17.9317	-16.1181	-16.9225	-19.3192	-21.0098	-13.5965	-18.6803	-11.2509	-15.0497	-18.3366	-16.2159	-19.094	-14.1637	-14.5426	-18.2061	-17.4826	-17.9563	-19.3943	-14.9836	-15.2533	-14.7284	-16.5684	-15.3781	-16.812	-17.4807	-18.8952	-13.1751	-15.4564	-16.6488	-18.4189	-17.7741	-15.0589	-11.0482	-12.5134	-15.942	-14.062	-15.7157	-11.5188	-18.3013	-18.0445	-15.2309	-14.7115	-10.4891
284.5	781.5	11.1348	4.55439	-14.0097	-15.4493	-16.401	-15.8993	-14.9383	-13.1584	-14.4	-18.6768	-15.3789	-17.3065	-10.8916	-14.5951	-15.6733	-15.4373	-16.609	-15.5914	-14.9634	-12.6973	-15.5115	-19.8224	-17.1385	-16.8618	-16.4587	-16.4867	-14.9063	-14.4865	-14.7272	-19.1209	-16.0792	-12.0804	-16.49	-17.9263	-18.2648	-13.4182	-11.6764	-16.5252	-14.4373	-13.3264	-20.0574	-24.2636	-17.3874	-14.3278	-14.4032	-17.2044	-16.8461	-17.578
285.5	781.5	11.1349	4.55438	-12.7801	-15.0367	-16.6217	-15.74	-14.113	-13.634	-14.7297	-18.0597	-16.6824	-18.0929	-14.2358	-14.6462	-17.717	-14.7598	-18.0139	-11.3441	-13.2966	-11.7563	-14.7144	-20.6024	-17.2872	-15.5475	-15.137	-16.2889	-14.275	-15.2937	-15.6709	-18.9742	-14.7163	-13.8366	-12.7535	-16.3895	-18.7905	-14.0611	-10.2995	-15.5546	-14.2434	-10.7214	-15.965	-19.0672	-15.3094	-13.069	-15.1424	-16.1039	-21.3923	-17.4262
286.5	781.5	11.135	4.55438	-10.3924	-16.7057	-17.4866	-17.9571	-13.5718	-15.4052	-14.5726	-18.2957	-15.5533	-16.1183	-17.733	-17.4232	-19.9512	-14.8674	-16.6015	-10.7704	-13.9279	-14.9635	-13.8613	-20.235	-19.803	-15.6732	-14.6655	-16.9442	-14.6742	-15.9942	-16.019	-18.6259	-14.2003	-15.0593	-12.4647	-14.6818	-14.8775	-14.0742	-9.93556	-14.2224	-13.5483	-8.86962	-12.8762	-18.476	-12.261	-13.7929	-15.1424	-15.1549	-19.4298	-15.5168
287.5	781.5	11.1351	4.55438	-9.00722	-18.7136	-19.8639	-18.9608	-13.0887	-19.8137	-14.7805	-18.6308	-15.5365	-15.9115	-16.5726	-20.863	-19.7641	-14.704	-14.7393	-11.6191	-17.0104	-18.8661	-14.5674	-18.6541	-19.5918	-16.6289	-16.3953	-19.2097	-15.9553	-16.0116	-15.1916	-18.1518	-16.1025	-13.5731	-13.6296	-14.5122	-13.3853	-14.1038	-12.1169	-11.8342	-11.1722	-8.76089	-12.0754	-19.2425	-11.0163	-16.3801	-14.6509	-15.2018	-16.4964	-13.2503
288.5	781.5	11.1352	4.55438	-9.81363	-18.4506	-18.8065	-17.2692	-13.5319	-21.789	-14.6571	-20.0939	-14.4524	-16.0071	-14.9702	-17.5703	-16.1531	-13.6104	-14.3906	-12.0967	-20.2509	-19.263	-17.2876	-18.1956	-19.4401	-16.1739	-17.8609	-19.0852	-16.1793	-16.2463	-15.4028	-18.2798	-17.7157	-11.667	-14.7161	-14.4211	-14.5499	-14.4937	-15.2628	-10.6863	-10.5515	-10.1129	-12.9489	-17.6227	-10.7208	-18.9659	-15.246	-15.3795	-16.5502	-13.2384
289.5	781.5	11.1353	4.55438	-10.9789	-16.7292	-17.3742	-15.1876	-14.9919	-16.1671	-14.746	-23.9037	-14.5049	-16.6727	-13.9242	-14.7745	-15.7927	-13.7342	-16.1811	-12.7314	-17.7931	-18.5996	-19.6084	-18.088	-18.7867	-15.2977	-16.1962	-17.1044	-15.6313	-15.4704	-17.5314	-18.9529	-16.7964	-11.5002	-15.8836	-14.6106	-16.3086	-16.2806	-15.592	-10.8281	-11.025	-12.7147	-14.7033	-16.5847	-11.0537	-19.3877	-15.7928	-15.6086	-14.1747	-15.0927
290.5	781.5	11.1354	4.55438	-12.3452	-17.0176	-18.002	-15.7556	-15.5944	-14.2042	-17.7732	-25.3829	-15.627	-18.9993	-13.3292	-15.5734	-17.3912	-15.54	-17.8303	-14.0402	-15.9893	-18.5757	-20.2282	-16.8044	-17.8168	-14.6487	-14.8771	-15.7155	-16.2102	-14.7562	-16.8871	-21.3345	-15.1083	-13.2875	-17.0066	-15.3482	-17.0032	-17.2341	-15.0515	-11.2303	-11.8033	-16.1928	-16.2733	-16.9951	-12.5164	-17.9929	-15.8648	-16.5032	-14.0953	-13.4472
285.5	782.5	11.1349	4.5543	-10.8239	-14.6228	-16.7997	-15.6404	-13.2626	-12.6817	-14.3604	-15.9478	-14.5842	-15.407	-12.4401	-15.2216	-16.8138	-14.1487	-18.0132	-10.0551	-12.2558	-12.1362	-15.4118	-17.8517	-17.1455	-14.7364	-15.0214	-12.9348	-15.2481	-15.6486	-13.5456	-19.7077	-13.5377	-12.6657	-15.6735	-14.6862	-16.2252	-13.7902	-11.0683	-14.4237	-12.9976	-10.9934	-16.6005	-15.5022	-13.7072	-12.7347	-14.6701	-13.7576	-20.098	-15.5144
286.5	782.5	11.135	4.55429	-9.73454	-16.5131	-18.0433	-16.7267	-13.433	-14.2897	-14.7999	-16.7314	-13.5176	-13.8258	-15.0604	-16.2349	-20.3256	-13.9284	-16.9104	-9.46966	-12.7623	-13.4466	-13.3774	-18.5477	-20.6308	-15.2649	-14.8292	-13.2751	-15.5472	-15.851	-15.9625	-19.1061	-14.2788	-14.2485	-14.7261	-14.3072	-14.0041	-14.9229	-10.466	-12.5626	-12.2601	-9.66242	-14.5075	-16.8685	-12.2417	-12.9155	-14.0536	-13.6258	-21.3455	-13.4115
287.5	782.5	11.1351	4.55429	-9.92827	-18.0047	-17.8394	-18.0933	-13.9662	-18.8772	-16.9194	-17.6858	-13.5347	-15.0537	-15.8193	-17.0568	-17.4812	-13.4458	-13.86	-10.868	-15.8352	-15.6612	-13.3304	-18.97	-20.9684	-17.1951	-15.886	-14.6862	-16.7098	-16.6908	-16.6353	-17.8062	-16.3638	-13.6019	-13.9722	-14.8461	-12.9005	-15.3433	-12.7729	-11.3302	-11.075	-9.8608	-12.7771	-20.6376	-11.3144	-15.3986	-14.5816	-14.7883	-17.0912	-13.546
288.5	782.5	11.1352	4.55429	-10.4846	-17.6614	-16.8676	-17.7139	-13.9786	-21.3213	-18.6291	-19.7887	-14.5221	-16.6163	-15.9613	-15.8019	-14.5277	-12.8428	-12.2267	-11.6516	-21.7153	-18.5273	-16.1237	-18.3035	-19.8804	-18.1255	-16.7291	-16.9901	-16.7097	-18.365	-15.9503	-17.69	-18.0628	-11.338	-13.8085	-14.81	-13.3976	-15.1607	-16.8948	-11.3481	-11.0182	-11.031	-13.8449	-19.2675	-11.2948	-17.6983	-15.7131	-16.6136	-15.7985	-15.996
289.5	782.5	11.1353	4.55429	-10.978	-16.5309	-16.2163	-16.2697	-14.4549	-15.3831	-17.0371	-23.0019	-16.2351	-16.9203	-15.6543	-14.6867	-14.4321	-13.8377	-13.5142	-13.9455	-19.9474	-20.4207	-19.7823	-18.7381	-19.1841	-17.1288	-15.7574	-18.6796	-15.7684	-18.1544	-15.9714	-19.0006	-17.5811	-11.6297	-14.4228	-15.2107	-15.2205	-15.9923	-14.8728	-12.8438	-11.8133	-12.0949	-16.5854	-17.3566	-12.568	-17.7868	-14.5827	-17.8036	-13.7272	-17.2096
290.5	782.5	11.1354	4.55429	-11.6286	-16.2652	-17.2882	-17.6551	-15.4349	-13.4382	-17.8902	-21.0265	-17.2471	-16.7132	-15.8399	-15.0833	-16.087	-15.8579	-15.8754	-16.0438	-18.6051	-19.6303	-20.7386	-19.6841	-18.5824	-16.3249	-15.7559	-17.0269	-15.5118	-16.2009	-15.6074	-21.2696	-16.2457	-14.1546	-16.2266	-16.4046	-18.0018	-16.2231	-14.6023	-12.8647	-12.9048	-13.5088	-18.0096	-17.5124	-15.3894	-18.4388	-13.5034	-17.7089	-13.6999	-15.7897
285.5	783.5	11.1349	4.55421	-12.1499	-17.2506	-18.3584	-15.0488	-14.0947	-14.4437	-13.554	-15.1547	-14.188	-16.0197	-13.4444	-14.0862	-15.4265	-14.6258	-19.4754	-10.3175	-14.1364	-13.2187	-15.5927	-16.0214	-16.645	-15.3944	-14.4562	-12.8908	-17.0325	-18.2215	-11.8208	-18.2571	-14.3672	-11.7552	-19.6342	-14.1678	-15.0011	-15.7798	-13.0936	-13.0484	-12.2756	-11.2554	-14.435	-14.0382	-13.0774	-14.2834	-14.9509	-12.6103	-17.0074	-15.6818
286.5	783.5	11.135	4.5542	-11.0503	-17.5551	-18.6992	-15.9448	-13.838	-15.6712	-15.26	-16.3339	-13.5198	-14.2268	-13.9252	-13.8855	-20.2359	-13.647	-21.1891	-10.1497	-13.6657	-12.4013	-13.7296	-16.9704	-19.1522	-15.6673	-15.8118	-13.1294	-16.1198	-16.5782	-15.7443	-17.3095	-15.36	-13.1292	-16.7772	-14.1	-14.6616	-16.577	-12.2312	-12.9929	-11.0812	-11.7762	-14.7777	-16.058	-12.4353	-15.2687	-15.4153	-13.1276	-18.5466	-14.2024
287.5	783.5	11.1351	4.5542	-11.8299	-16.7339	-16.9522	-18.1207	-15.2021	-18.7175	-18.9645	-17.3	-14.4631	-15.6675	-15.3841	-14.1755	-18.6643	-12.9712	-15.7213	-11.972	-15.3992	-12.3954	-13.5893	-16.9869	-22.1585	-18.0753	-16.7091	-14.2155	-16.7414	-17.4719	-19.6512	-15.2181	-17.3806	-14.5075	-15.8083	-14.8344	-14.0822	-15.2119	-13.8388	-11.9038	-11.2437	-12.8758	-13.7135	-19.7073	-11.8683	-17.612	-16.1981	-14.1829	-15.4442	-15.5494
473.5	486.5	11.152	4.58061	-14.8347	-16.3135	-16.5961	-17.9863	-20.1932	-16.5305	-17.6658	-16.8419	-13.9251	-17.1761	-11.3588	-13.5751	-15.8798	-14.711	-12.2196	-15.9281	-13.2923	-15.6144	-19.1031	-18.3689	-20.3822	-14.8569	-13.7974	-12.6498	-19.0745	-17.1749	-15.2237	-16.7799	-16.0531	-12.4682	-12.0173	-21.7147	-14.8988	-23.5077	-13.7666	-13.3363	-13.4417	-15.2712	-12.6369	-11.9602	-17.2014	-14.9457	-12.5132	-12.01	-16.521	-19.2453
470.5	487.5	11.1517	4.58052	-13.0339	-14.9183	-15.584	-18.6458	-16.334	-14.7837	-16.7656	-18.7515	-12.7104	-14.4317	-12.4115	-12.5203	-14.4775	-16.9788	-20.946	-18.0141	-16.3355	-15.2075	-18.5453	-18.6552	-17.3565	-16.8672	-20.7307	-15.0495	-16.0082	-17.8408	-14.6814	-15.6585	-11.7072	-17.2597	-18.7014	-17.2514	-14.4307	-17.0528	-17.6966	-13.7052	-15.1358	-15.0463	-15.7307	-16.0737	-15.0329	-18.9069	-16.531	-19.0351	-18.8509	-19.557
471.5	487.5	11.1518	4.58052	-14.472	-16.6261	-14.5074	-17.1223	-17.7357	-13.94	-15.2602	-16.7867	-12.5193	-16.3304	-12.3753	-13.2659	-15.4827	-17.3918	-18.3533	-17.1823	-15.4192	-14.5427	-17.1906	-17.5371	-15.4512	-14.1744	-17.1536	-12.7674	-16.579	-16.2091	-12.2203	-17.7361	-11.8829	-16.5627	-15.8185	-15.5297	-16.2401	-20.0478	-19.3798	-14.5946	-13.8689	-15.4234	-16.0821	-16.3979	-18.3003	-17.3298	-14.2223	-17.7141	-20.6431	-16.4245
472.5	487.5	11.1519	4.58052	-15.1806	-17.594	-15.3536	-16.1987	-18.4706	-15.3894	-14.8343	-16.1129	-13.3475	-17.3231	-11.299	-15.1301	-16.9652	-15.4271	-14.9384	-17.6848	-12.9046	-16.9314	-18.4949	-15.7432	-17.1668	-12.4797	-15.2781	-11.4977	-16.6501	-16.0568	-12.594	-17.458	-13.1036	-16.2755	-14.589	-16.5296	-15.9689	-20.1646	-21.1785	-15.631	-13.7248	-15.8615	-15.7982	-17.2156	-21.0226	-15.3878	-15.1697	-15.1571	-19.4709	-16.5795
473.5	487.5	11.152	4.58052	-15.7431	-17.1328	-16.6393	-16.9535	-18.4667	-18.2664	-16.3262	-15.4921	-13.653	-16.4457	-11.1319	-15.3154	-16.3228	-14.5405	-14.9156	-17.7231	-12.4527	-14.6293	-19.6213	-19.8215	-21.1923	-12.9466	-13.064	-11.4859	-17.2827	-17.2665	-15.2338	-17.0169	-14.47	-14.5308	-12.4832	-17.1241	-14.7208	-17.8762	-16.212	-16.0173	-13.8016	-15.4187	-16.2952	-14.6341	-17.9931	-13.2266	-14.8888	-13.6996	-17.0214	-18.1965
468.5	488.5	11.1515	4.58044	-15.7698	-16.9169	-16.5214	-17.664	-16.5037	-17.8474	-12.9525	-16.1772	-16.246	-15.3386	-13.7208	-14.113	-15.348	-16.9723	-15.9253	-20.1503	-17.8627	-17.8608	-17.444	-24.6258	-19.2668	-22.0616	-20.1127	-19.4486	-17.6755	-15.3151	-16.8489	-15.0376	-15.7852	-13.1936	-18.2672	-15.6797	-15.9257	-14.4207	-18.7495	-14.4383	-12.8626	-15.8462	-14.6902	-14.2279	-14.7813	-16.7949	-19.8272	-19.9223	-17.2556	-14.6502
469.5	488.5	11.1516	4.58043	-12.6004	-15.7799	-15.8785	-18.8226	-15.5158	-20.2716	-14.5673	-19.1865	-15.148	-14.5174	-12.5947	-13.6799	-14.7379	-15.3783	-17.1983	-19.8435	-17.7527	-19.0068	-17.2251	-21.1424	-22.6748	-26.2084	-20.3776	-16.849	-15.113	-16.6903	-17.1488	-14.2333	-13.2485	-13.1081	-17.6877	-16.3375	-14.1974	-14.9034	-16.7638	-12.4277	-14.2658	-13.0992	-15.5107	-14.3934	-15.8192	-18.4433	-18.9301	-18.4462	-15.3125	-13.9571
470.5	488.5	11.1517	4.58043	-12.831	-15.5903	-15.1311	-20.1674	-16.1392	-15.7395	-16.2748	-18.7891	-14.3528	-14.8408	-12.0872	-12.1034	-13.901	-15.9105	-18.7022	-19.1801	-16.0392	-16.9798	-16.7014	-20.6622	-18.567	-22.1673	-19.1839	-14.3835	-15.693	-16.0783	-16.0868	-15.5272	-12.8718	-13.9948	-17.3421	-18.0573	-14.6321	-19.2944	-16.5074	-11.8868	-16.4128	-11.3062	-17.2131	-15.9471	-15.8661	-17.5627	-17.8445	-19.4936	-16.2156	-16.307
471.5	488.5	11.1518	4.58043	-14.2554	-17.3442	-13.9616	-18.1062	-17.4863	-15.2961	-15.3177	-16.6131	-14.7015	-17.2158	-11.8499	-11.8397	-15.2653	-16.4679	-16.8659	-18.5385	-15.1586	-14.6332	-17.2329	-20.2099	-14.9896	-17.1274	-17.5511	-12.596	-20.1784	-15.222	-13.6146	-16.6206	-13.6372	-15.7158	-14.991	-15.2514	-17.4948	-18.1903	-17.8303	-11.9989	-15.9589	-12.2866	-17.4516	-17.4827	-19.0504	-15.1885	-15.2938	-17.8171	-19.1075	-17.9244
472.5	488.5	11.1519	4.58043	-15.0172	-17.3671	-14.5221	-15.9099	-16.5929	-16.8672	-14.907	-16.8256	-15.3662	-18.2184	-11.0534	-15.4414	-19.2604	-14.3948	-16.1561	-16.7528	-14.3007	-15.347	-18.3869	-18.2331	-14.5274	-13.4001	-15.9328	-12.6288	-18.476	-13.7549	-12.1139	-19.0949	-12.4396	-16.0527	-14.6548	-13.2268	-17.4323	-15.6935	-18.923	-15.0852	-15.101	-14.091	-17.8346	-17.0086	-20.0715	-14.6051	-17.4598	-16.7759	-19.2447	-17.2803
473.5	488.5	11.152	4.58043	-16.5268	-16.8814	-15.3014	-16.0031	-17.0479	-19.2259	-15.4903	-16.3194	-16.0956	-15.9968	-10.2711	-21.7818	-20.9127	-13.4531	-17.0723	-17.5896	-15.1381	-14.6518	-18.3972	-21.0337	-18.5098	-12.0295	-14.9371	-13.3039	-17.192	-15.1872	-12.8851	-18.8046	-12.3682	-15.0742	-14.9198	-12.7376	-14.9294	-14.5846	-18.506	-18.1143	-15.6566	-14.2553	-18.9823	-15.7888	-17.1094	-13.4789	-18.2369	-15.6384	-18.079	-18.0384
474.5	488.5	11.1521	4.58043	-17.7033	-18.8978	-16.9205	-15.3564	-17.4126	-17.5359	-15.7505	-15.6761	-12.6111	-17.8435	-10.5444	-19.1722	-15.5257	-13.9652	-18.2889	-20.6584	-15.6371	-11.1261	-19.2303	-18.6274	-20.9254	-14.9703	-14.7564	-15.1245	-13.57	-13.5052	-14.7155	-16.7934	-12.6119	-14.4765	-13.0504	-12.4285	-13.3114	-13.612	-16.5161	-19.4828	-16.0759	-16.0123	-18.9236	-16.9528	-15.0016	-13.307	-18.1277	-12.2752	-17.0514	-18.4424
469.5	489.5	11.1516	4.58035	-13.4964	-15.9812	-14.9933	-15.9644	-14.1092	-21.2436	-13.9545	-17.1096	-18.6155	-15.9319	-11.1959	-15.3421	-18.5315	-15.4773	-17.1724	-17.8002	-14.6609	-17.2458	-15.4259	-22.1499	-23.8947	-21.2899	-18.8036	-17.8319	-17.8706	-19.4049	-16.4085	-14.1212	-13.8252	-11.7348	-16.9868	-16.7837	-17.5774	-16.4801	-16.3585	-15.1924	-14.4953	-12.6589	-16.9536	-12.8627	-17.4825	-21.9204	-19.1334	-17.6591	-13.0174	-13.1862
470.5	489.5	11.1517	4.58034	-14.0464	-16.6864	-15.6645	-16.9914	-14.9321	-17.0956	-15.2523	-17.4518	-17.2002	-17.2404	-11.1644	-12.7575	-14.4387	-15.6774	-16.4269	-17.9937	-14.582	-20.0226	-16.1865	-20.7235	-19.903	-26.0887	-18.3703	-14.9332	-19.0242	-17.4179	-18.543	-16.773	-13.5302	-11.9764	-17.0574	-18.7657	-19.8577	-15.7949	-15.6266	-13.2027	-16.1467	-10.133	-18.1867	-13.0105	-17.9698	-20.129	-17.5173	-16.8204	-13.9485	-16.9716
471.5	489.5	11.1518	4.58034	-16.9988	-16.5313	-15.9069	-15.5636	-15.137	-15.8526	-16.4453	-16.1505	-14.1668	-18.9705	-11.3604	-11.8487	-13.3917	-15.4087	-16.5374	-18.3131	-16.2271	-15.2924	-18.0327	-20.7163	-15.0266	-22.3688	-17.966	-13.7493	-22.5806	-15.4809	-16.4012	-17.9748	-14.4649	-15.3326	-14.8476	-17.6873	-19.2838	-14.5946	-15.318	-12.3278	-16.4584	-11.0346	-19.5925	-15.1769	-18.8165	-15.6627	-16.2005	-16.897	-16.1648	-21.604
472.5	489.5	11.1519	4.58034	-16.5439	-15.5858	-14.2932	-13.9501	-13.5674	-15.868	-17.13	-15.6552	-13.8875	-18.4125	-11.0321	-16.1198	-15.6116	-12.5057	-17.0865	-16.3399	-16.5901	-14.6569	-16.8913	-19.077	-13.8884	-15.4867	-17.6881	-15.0215	-21.5641	-13.5264	-12.3356	-19.8671	-12.0559	-16.5671	-14.7061	-12.469	-17.9058	-12.9404	-15.3812	-14.8035	-17.3219	-13.5456	-20.4663	-15.9576	-17.5299	-14.9701	-17.3756	-16.833	-18.2738	-20.6823
473.5	489.5	11.152	4.58034	-17.0058	-16.4668	-13.2982	-15.1391	-15.0795	-16.4642	-16.2247	-15.3978	-16.8282	-16.9093	-9.84304	-22.2744	-19.6641	-11.253	-18.9095	-17.7778	-17.6909	-16.1464	-16.2304	-20.4098	-17.4734	-13.3301	-18.173	-17.0617	-17.429	-14.9963	-11.1977	-21.665	-11.4246	-15.598	-17.8003	-11.1212	-16.9643	-14.1009	-15.9818	-18.5525	-18.0106	-14.9759	-16.2572	-15.4045	-17.0195	-15.0164	-17.0484	-16.6668	-19.6962	-19.6033
474.5	489.5	11.1521	4.58034	-17.6305	-18.8712	-14.3303	-13.0917	-16.5392	-15.4227	-14.4163	-15.322	-15.0595	-19.7733	-9.39878	-18.7583	-17.5923	-13.0569	-21.3736	-20.3926	-15.8561	-13.738	-19.2641	-16.1907	-20.7015	-14.342	-17.9649	-17.1103	-13.3466	-14.3173	-12.434	-18.1609	-12.8574	-14.6004	-15.2526	-12.6139	-16.9163	-14.9872	-17.4362	-18.6444	-16.6271	-18.1695	-16.4695	-16.9764	-16.7291	-16.0409	-18.1994	-13.9867	-19.3165	-18.6917
469.5	490.5	11.1516	4.58026	-14.8839	-15.5071	-15.6899	-15.2943	-12.9333	-17.8161	-14.8546	-13.9051	-14.8188	-15.0957	-11.0889	-15.7341	-17.565	-13.7127	-19.5485	-16.4331	-14.9103	-17.8531	-17.3796	-20.6282	-22.6199	-17.6123	-17.9948	-17.2336	-21.1346	-18.3003	-16.1235	-13.52	-14.6389	-12.3476	-18.7135	-16.4768	-17.6054	-13.7701	-17.0238	-18.1135	-13.0907	-15.1422	-16.2261	-15.9888	-17.2616	-20.062	-19.4557	-17.7397	-11.8405	-15.1354
470.5	490.5	11.1517	4.58025	-14.9834	-16.5956	-17.1325	-16.229	-13.3131	-15.8154	-15.7667	-14.6127	-15.6329	-15.7816	-10.7499	-14.0277	-14.5022	-15.3493	-18.2173	-17.1968	-14.7414	-19.4489	-19.9263	-20.3076	-22.5493	-20.7084	-16.6911	-15.8364	-19.9897	-17.733	-18.9714	-17.4863	-14.6836	-11.7621	-18.7667	-19.9018	-19.8834	-13.1552	-15.5548	-16.5524	-13.2873	-12.5923	-18.4252	-15.5142	-19.6709	-18.0759	-17.1553	-14.5298	-12.39	-19.5373
471.5	490.5	11.1518	4.58025	-16.0979	-15.9902	-17.4758	-13.6112	-12.9723	-14.0966	-17.5876	-15.3287	-13.1406	-18.3819	-10.5215	-14.2763	-11.5285	-14.1761	-18.1363	-16.7397	-17.8019	-16.4738	-20.8506	-21.58	-17.8666	-23.4766	-15.7678	-14.9604	-19.4566	-16.3053	-17.4113	-19.2263	-14.9562	-15.6326	-16.2566	-20.755	-19.8901	-12.3199	-14.9922	-14.5117	-13.4806	-12.8373	-21.3828	-15.7449	-18.6712	-15.9487	-16.065	-15.1757	-14.6148	-22.4074
472.5	490.5	11.1519	4.58025	-15.7045	-14.7573	-15.8436	-12.6318	-12.2249	-14.0913	-20.2372	-14.4299	-13.1422	-19.0237	-10.1823	-17.7797	-11.7783	-10.4689	-19.4967	-16.2322	-17.7678	-15.0655	-16.4417	-20.2593	-17.2453	-17.6423	-16.2461	-15.769	-19.1511	-14.2079	-13.408	-17.6822	-13.2281	-16.7352	-15.619	-14.8412	-17.9104	-12.3299	-14.4243	-15.2121	-15.3923	-14.5871	-20.8608	-16.7298	-16.6944	-14.808	-16.0742	-16.7366	-18.012	-21.6812
473.5	490.5	11.152	4.58025	-15.2549	-15.3419	-13.2819	-13.8337	-13.7204	-14.4135	-17.1429	-13.4158	-15.3449	-18.1314	-9.65762	-17.1798	-14.4015	-9.3296	-22.2834	-18.062	-17.2017	-16.6479	-15.5143	-18.9211	-18.341	-15.8045	-19.5778	-16.7921	-16.6577	-13.2693	-12.1112	-19.6383	-12.5052	-15.2314	-17.3791	-14.0879	-16.984	-14.9284	-14.6398	-17.9329	-16.026	-15.7171	-16.3464	-17.6058	-17.1001	-14.913	-16.642	-16.6079	-21.7484	-20.0978
474.5	490.5	11.1521	4.58025	-14.1653	-17.5829	-12.9825	-12.9536	-15.4515	-15.1109	-14.2864	-13.7175	-16.7183	-18.4188	-9.62208	-14.9928	-16.528	-11.651	-27.5493	-18.4034	-15.0592	-15.6034	-19.2117	-14.8869	-18.4536	-15.9953	-19.4899	-17.5861	-14.3663	-13.4964	-13.129	-19.5911	-14.8925	-15.1819	-16.4962	-15.2517	-17.2505	-15.1722	-17.2155	-18.2264	-14.7648	-16.3108	-15.3575	-17.6587	-19.5481	-16.9847	-19.3238	-15.4648	-22.2412	-17.2172
475.5	490.5	11.1522	4.58025	-13.2393	-17.6372	-14.5498	-13.0794	-15.6643	-15.2154	-13.758	-14.1629	-17.1935	-20.3559	-10.4261	-15.0631	-16.4808	-15.5305	-27.3973	-15.9206	-13.5054	-15.7935	-21.4033	-14.5139	-18.4359	-16.1132	-17.3596	-16.9895	-14.2731	-16.0025	-17.669	-17.4766	-16.6479	-18.9172	-18.7509	-16.8122	-16.2059	-12.6901	-20.1484	-15.837	-14.3372	-15.308	-14.3677	-16.5813	-17.3465	-19.3826	-18.64	-14.1249	-21.2811	-20.2716
470.5	491.5	11.1517	4.58017	-14.6854	-15.4285	-16.9864	-14.8588	-11.9165	-14.3837	-13.6693	-12.4614	-12.7824	-13.7632	-10.4573	-17.2409	-13.3611	-16.7641	-20.7905	-17.2736	-16.2513	-20.6565	-23.2448	-19.7742	-23.6956	-18.0275	-15.1269	-17.4906	-19.369	-14.6298	-21.5227	-19.3265	-17.8664	-14.7415	-21.7564	-21.5322	-17.9586	-13.6167	-16.508	-16.9096	-12.7787	-16.8554	-16.3384	-20.2874	-24.3117	-18.8335	-18.1866	-14.917	-12.3762	-17.3967
471.5	491.5	11.1518	4.58016	-14.1997	-15.5243	-16.0354	-14.0818	-11.7912	-13.6303	-15.4867	-14.8747	-12.5463	-14.611	-9.52177	-17.9937	-10.9865	-13.3304	-19.7567	-17.7948	-17.6059	-17.934	-23.9637	-21.49	-21.2195	-19.7955	-14.4911	-16.6251	-18.3192	-14.3326	-18.5968	-19.1716	-16.8641	-18.0486	-19.3029	-22.2935	-18.8399	-12.7701	-17.4344	-14.3375	-13.3364	-15.7374	-18.1517	-19.0185	-24.3464	-15.1144	-18.4246	-15.1041	-14.7774	-19.9515
472.5	491.5	11.1519	4.58016	-13.1103	-14.1746	-15.8035	-13.4595	-12.449	-13.5284	-19.1486	-15.2788	-14.4388	-16.0262	-9.70622	-16.6924	-10.8469	-9.97814	-24.1987	-17.7845	-19.1115	-16.1915	-18.184	-20.8012	-21.3494	-19.8137	-15.6077	-18.1071	-17.0702	-13.3259	-16.1184	-15.8016	-15.0446	-17.1155	-18.0787	-17.9911	-17.8278	-13.7771	-16.5533	-14.5348	-14.3716	-13.8082	-16.6872	-16.8321	-18.9354	-13.6165	-18.1331	-16.3347	-19.1515	-20.9659
473.5	491.5	11.152	4.58016	-12.6481	-13.4118	-13.8862	-13.3394	-14.7965	-13.9325	-17.0283	-13.4564	-16.6698	-15.5014	-10.1138	-13.7129	-12.8097	-9.11637	-24.3685	-18.3023	-20.6804	-16.6723	-16.77	-18.3042	-20.3154	-18.3453	-18.2544	-19.6827	-16.9773	-12.3302	-14.6901	-17.2089	-14.0231	-15.4274	-18.3231	-18.5123	-16.1833	-16.5655	-15.5355	-16.5496	-13.6539	-13.7744	-14.2267	-17.6134	-17.913	-13.9978	-17.1735	-17.2748	-21.0774	-20.0179
474.5	491.5	11.1521	4.58016	-12.4089	-14.8993	-12.6929	-12.9048	-16.171	-15.4146	-14.0851	-13.4351	-15.8342	-15.6262	-10.3466	-11.6298	-13.5188	-11.4956	-22.013	-17.5588	-15.9466	-17.4972	-19.6973	-15.117	-18.3641	-18.4502	-17.8278	-18.2935	-17.4102	-13.5163	-14.507	-20.9209	-16.4068	-15.2256	-17.3703	-20.7667	-15.0457	-15.7472	-18.3441	-17.4657	-13.0581	-14.3861	-13.8823	-16.9106	-18.9603	-15.5025	-19.5198	-16.1772	-19.7669	-17.5561
470.5	492.5	11.1517	4.58008	-13.121	-14.4386	-14.961	-13.9003	-12.8241	-15.1368	-13.8339	-12.9155	-13.497	-14.1905	-10.3655	-15.1985	-13.2345	-18.6035	-24.3766	-19.4774	-15.9909	-19.2682	-20.902	-19.4203	-23.9521	-18.9797	-16.4332	-17.0184	-19.3093	-13.833	-21.4482	-18.7534	-15.5993	-16.4754	-20.4704	-20.278	-17.6741	-16.7223	-17.2933	-15.2583	-14.7421	-14.7336	-15.8041	-19.5569	-24.6553	-17.7505	-20.7604	-15.7254	-13.7824	-16.9812
471.5	492.5	11.1518	4.58007	-12.931	-16.035	-15.1171	-15.0685	-12.9455	-15.3148	-15.288	-15.9749	-12.8729	-12.8357	-9.10177	-15.9093	-12.0857	-13.2223	-25.6582	-22.8788	-16.2785	-18.2172	-20.5165	-20.3385	-26.894	-21.4292	-15.5341	-17.3833	-17.7379	-14.8324	-21.1606	-16.8325	-13.44	-18.7319	-20.8826	-20.8787	-17.2958	-15.6862	-19.9213	-13.0687	-15.0326	-15.3595	-17.6641	-19.9566	-25.8563	-17.4275	-22.8279	-18.3025	-15.78	-19.3787
472.5	492.5	11.1519	4.58007	-12.0644	-15.0219	-15.7054	-17.1181	-13.9444	-15.1559	-17.2932	-18.4227	-13.7635	-12.1619	-10.7703	-14.2557	-12.3049	-10.5555	-28.3206	-21.6134	-18.9516	-16.4086	-18.8181	-20.9856	-21.8518	-22.5339	-17.4003	-19.3873	-16.4062	-14.0619	-19.1988	-15.924	-13.0853	-17.5284	-21.0527	-18.4578	-18.0044	-17.7352	-16.9105	-14.7931	-15.4489	-12.531	-15.7416	-15.0924	-18.9405	-14.0386	-22.1953	-17.271	-18.0631	-20.1289
357.5	605.5	11.1415	4.57007	-14.1137	-14.685	-12.3478	-14.885	-17.2965	-21.2951	-18.1818	-15.7394	-17.2154	-14.1988	-12.7485	-13.7167	-11.7524	-15.3075	-16.7013	-19.4544	-17.5935	-18.9624	-17.0162	-14.7687	-19.5753	-19.407	-17.7574	-26.1908	-13.0756	-14.5086	-14.8895	-16.2807	-15.0776	-16.3966	-11.6762	-15.9267	-17.2337	-19.2864	-22.502	-14.0556	-17.1581	-14.3109	-14.2212	-13.5691	-12.3434	-18.5806	-18.218	-15.5416	-19.5216	-20.1327
358.5	605.5	11.1416	4.57007	-12.153	-14.6391	-11.6145	-14.5193	-19.6446	-21.221	-17.3508	-16.748	-17.5821	-13.645	-11.2166	-15.3355	-13.1401	-15.9293	-15.8639	-18.6166	-15.3547	-24.2947	-16.8482	-14.6769	-23.9504	-19.7688	-17.0615	-22.5703	-16.8808	-17.1133	-15.3516	-16.8062	-18.618	-18.5552	-14.0861	-15.1143	-16.1761	-16.5049	-18.6585	-13.0247	-16.6961	-18.8605	-14.7122	-12.0325	-16.7174	-21.1328	-19.5586	-14.7136	-15.746	-19.6013
359.5	605.5	11.1417	4.57007	-13.1538	-15.2615	-12.696	-12.2368	-24.7939	-17.9968	-16.3433	-15.1835	-16.9103	-14.1586	-10.6792	-15.9378	-12.3764	-17.9088	-13.8113	-20.1384	-16.554	-21.5791	-16.2551	-15.6981	-19.3454	-18.6297	-16.5137	-22.1048	-20.9375	-18.5917	-20.6503	-19.3492	-18.3232	-16.2741	-16.458	-17.5418	-16.7405	-16.1967	-17.023	-12.8411	-13.7408	-16.4939	-14.6737	-12.3806	-17.0721	-20.8923	-16.4258	-15.5347	-16.3468	-17.9998
357.5	606.5	11.1415	4.56998	-14.9534	-15.3267	-13.7904	-15.2192	-16.3095	-22.914	-17.75	-15.9309	-16.613	-16.8727	-12.5139	-13.9349	-12.2598	-16.0227	-15.8914	-19.7725	-16.2126	-17.4119	-16.0879	-13.0776	-19.4397	-18.779	-16.7568	-23.8734	-13.6241	-14.2332	-13.922	-15.9959	-14.7636	-13.6592	-12.3262	-14.0789	-16.3833	-17.0034	-19.9816	-12.3686	-18.8005	-16.7934	-12.686	-15.419	-14.6299	-18.7389	-15.7792	-16.3894	-18.8158	-18.8567
358.5	606.5	11.1416	4.56998	-12.4515	-14.5203	-12.2223	-16.1358	-17.6672	-20.515	-16.8621	-15.5463	-17.0076	-17.7464	-10.9918	-14.3532	-12.7643	-17.4524	-17.7717	-16.5551	-17.1842	-23.2485	-16.1119	-13.8807	-22.5397	-19.0256	-16.8417	-18.9295	-17.0707	-15.101	-15.3102	-16.3918	-17.4024	-17.493	-17.1704	-12.9888	-16.6958	-15.8362	-15.092	-11.5016	-18.4114	-18.9996	-14.3745	-13.2544	-18.2304	-19.1161	-16.0406	-15.2847	-15.247	-22.2755
359.5	606.5	11.1417	4.56998	-12.0709	-15.5634	-11.2653	-14.3579	-18.8726	-15.4016	-18.0448	-15.6424	-18.3335	-16.6056	-10.0221	-14.981	-11.2539	-17.1864	-15.1182	-17.7918	-18.1155	-22.0386	-15.2713	-15.4636	-20.3373	-20.4205	-17.0807	-17.3159	-17.5489	-19.221	-19.8541	-16.7629	-18.0747	-15.0462	-18.5551	-16.5617	-17.3434	-16.1508	-15.4613	-11.48	-15.5669	-13.8039	-15.9237	-13.6575	-20.0426	-20.7808	-15.0824	-16.4842	-14.0742	-18.9866
360.5	606.5	11.1418	4.56998	-13.6543	-18.1836	-12.4772	-13.4976	-16.5954	-13.4296	-17.2351	-17.2664	-19.5334	-15.8419	-10.5229	-14.0786	-12.3834	-15.4986	-14.1659	-17.8064	-19.2258	-20.2955	-16.703	-18.2398	-19.3771	-22.9159	-17.6687	-16.0598	-15.9895	-20.1412	-17.9905	-14.772	-19.0591	-14.3021	-21.5459	-17.1335	-18.225	-15.2383	-15.9604	-14.752	-15.5881	-12.6481	-14.9412	-16.8026	-18.0797	-19.9378	-17.3978	-19.0863	-14.5096	-17.6426
361.5	606.5	11.1419	4.56998	-13.0878	-16.5483	-15.2482	-14.6964	-16.3101	-13.4331	-14.5984	-19.5892	-17.3608	-17.7992	-13.8438	-13.9705	-13.8072	-14.3068	-14.1881	-16.3536	-18.4143	-19.2954	-19.9174	-19.8902	-14.6219	-22.3308	-18.0094	-14.7216	-16.7818	-19.3202	-14.2042	-13.6852	-19.9005	-15.0336	-19.5263	-15.8701	-16.4364	-14.5587	-17.3932	-17.1513	-16.0072	-14.7028	-15.4745	-17.4624	-18.8198	-18.4049	-17.4799	-17.6372	-16.0198	-16.3587
362.5	606.5	11.142	4.56998	-12.6927	-16.056	-16.8502	-15.5615	-16.7333	-15.2848	-13.9843	-18.473	-13.9301	-17.7067	-13.8138	-17.1488	-15.8423	-14.3145	-15.3272	-14.5999	-16.8631	-19.0881	-22.0033	-19.3856	-14.5792	-21.7533	-18.9449	-14.684	-17.9268	-17.8373	-12.969	-13.679	-20.4607	-17.3171	-18.3032	-14.4055	-15.2838	-15.1893	-16.3447	-16.9675	-16.8274	-16.8972	-14.9415	-16.2457	-19.2022	-16.5252	-17.1835	-17.1712	-17.085	-19.3273
357.5	607.5	11.1415	4.56989	-13.8942	-14.7993	-14.1437	-12.327	-14.2908	-21.3942	-16.8642	-15.4919	-16.4857	-15.2801	-12.2596	-13.4007	-11.9326	-17.1777	-15.8593	-20.8655	-15.2207	-16.8726	-15.6538	-15.145	-18.7739	-16.1104	-20.3039	-19.6336	-15.9898	-14.9194	-13.3982	-16.2601	-15.6441	-15.5454	-16.7243	-14.9059	-14.7051	-13.9556	-16.9635	-12.4297	-17.159	-16.9682	-12.4659	-16.7478	-15.867	-17.4813	-15.5974	-16.5446	-19.3501	-21.8541
358.5	607.5	11.1416	4.56989	-12.9993	-13.5351	-12.3506	-14.0035	-14.6088	-17.3838	-17.1389	-14.3865	-16.4721	-17.7356	-12.3497	-11.2172	-11.5969	-18.3274	-17.7332	-17.3152	-17.2865	-18.1523	-15.9506	-15.7715	-19.1618	-15.6986	-20.4895	-15.888	-17.6466	-16.7179	-14.0288	-16.7562	-16.891	-15.7139	-21.7815	-13.3938	-18.0294	-16.1642	-13.1293	-12.72	-18.3935	-17.437	-15.3695	-13.98	-19.2052	-15.8095	-14.8498	-16.4644	-15.5025	-22.5205
359.5	607.5	11.1417	4.56989	-12.9773	-14.1196	-10.7716	-14.7422	-15.6092	-14.0779	-17.7968	-14.2377	-17.7606	-17.1477	-11.8927	-13.2621	-11.2901	-15.9697	-17.4792	-16.8014	-19.3429	-19.3363	-15.4571	-16.6923	-19.2799	-19.153	-18.623	-15.5934	-15.3638	-20.7739	-17.6744	-15.3951	-17.6119	-13.6124	-19.2787	-14.9866	-19.0986	-16.1269	-13.7829	-12.6657	-16.4677	-12.1462	-16.5611	-15.6953	-21.1255	-17.7806	-15.7558	-18.4912	-13.5738	-20.612
360.5	607.5	11.1418	4.56989	-12.1415	-15.077	-11.3548	-14.8192	-14.5396	-12.8277	-15.7862	-13.8994	-20.3006	-16.2675	-10.9245	-14.0646	-12.5405	-14.0856	-16.1357	-16.6759	-19.6782	-18.9221	-16.3984	-17.2895	-23.5698	-22.447	-17.745	-15.7511	-14.5326	-19.2582	-18.5895	-14.0041	-18.4312	-13.4143	-22.639	-17.4421	-18.8104	-13.249	-15.5375	-14.8981	-16.3175	-12.9623	-14.4951	-16.5851	-19.7414	-18.9149	-16.7319	-18.873	-14.2461	-17.1433
361.5	607.5	11.1419	4.56989	-11.1327	-15.8199	-14.1138	-16.3579	-15.291	-13.496	-14.0751	-15.0759	-18.8243	-18.1453	-13.9445	-14.804	-14.1064	-13.0552	-15.0589	-15.4521	-19.0516	-17.9648	-19.0213	-16.2548	-17.2499	-23.878	-17.4563	-15.2387	-15.8989	-17.8987	-16.7682	-13.4153	-18.2025	-13.6088	-22.1604	-18.8406	-16.8236	-13.1652	-18.2161	-17.192	-16.48	-15.5472	-15.8452	-15.8717	-17.1666	-19.0696	-15.5887	-17.2571	-16.2349	-14.5199
362.5	607.5	11.142	4.56989	-11.9153	-14.9756	-16.2192	-15.8858	-17.2139	-15.8896	-14.0039	-18.277	-14.4604	-17.1352	-14.9892	-14.2689	-16.558	-13.7428	-14.7962	-14.0755	-18.6532	-17.1342	-21.2025	-15.7119	-14.5033	-19.7954	-18.4208	-15.3737	-18.1107	-17.5875	-15.5194	-13.7681	-17.9942	-14.1214	-19.8252	-16.3665	-15.9864	-14.2513	-16.329	-16.0116	-17.0085	-17.0543	-17.2148	-15.0829	-16.0959	-16.6299	-15.5773	-16.4672	-17.3852	-16.33
357.5	608.5	11.1415	4.5698	-13.7109	-13.4869	-13.6637	-11.0609	-14.086	-17.02	-17.0075	-15.9886	-17.8145	-13.8956	-12.4212	-13.8698	-10.2579	-17.7119	-18.8055	-19.2561	-15.5553	-17.7675	-16.0922	-20.9981	-15.7035	-14.6528	-20.8667	-18.5302	-18.687	-14.1494	-14.0819	-17.7105	-17.427	-17.414	-24.5661	-15.6408	-13.347	-13.7335	-16.1264	-15.2584	-16.5526	-16.2545	-14.1238	-15.6059	-16.2657	-17.0806	-17.0615	-15.1695	-21.2259	-23.7098
358.5	608.5	11.1416	4.5698	-14.2611	-12.7517	-12.6929	-12.7357	-14.0135	-16.3126	-16.7782	-14.433	-16.5107	-16.0445	-13.7179	-11.4365	-10.6467	-17.864	-19.3698	-19.4885	-18.9892	-18.2356	-16.537	-19.7796	-17.385	-14.9223	-21.2882	-16.2006	-17.4542	-15.2632	-14.1241	-19.5073	-17.5515	-15.1105	-21.3798	-15.0204	-19.0469	-17.5624	-13.035	-15.8768	-17.6638	-16.907	-14.5586	-14.2198	-17.0865	-14.5259	-17.1346	-15.4828	-17.11	-18.8887
359.5	608.5	11.1417	4.5698	-14.5039	-12.8261	-11.2078	-14.5829	-15.0342	-15.1102	-15.9242	-13.3019	-16.1476	-16.3335	-14.0552	-12.0256	-12.176	-16.0334	-17.7803	-19.1536	-21.4164	-18.9838	-17.3612	-19.9282	-19.857	-17.5929	-19.0889	-16.0668	-16.5766	-17.0445	-16.3048	-17.9931	-21.8747	-13.4547	-17.0918	-15.2257	-21.9515	-13.257	-13.0463	-14.0559	-16.4007	-13.6171	-14.5072	-17.4527	-16.3944	-16.1599	-16.9881	-17.9391	-16.0222	-20.61
360.5	608.5	11.1418	4.5698	-11.0594	-12.8643	-11.1383	-15.1237	-14.6305	-13.8406	-14.5719	-12.9594	-16.9851	-16.1391	-12.898	-12.4817	-13.938	-14.5004	-17.8139	-16.5977	-18.8362	-17.8047	-17.2292	-17.5848	-21.3138	-20.3377	-17.0069	-15.935	-16.096	-17.6447	-18.3955	-15.2239	-22.7704	-14.0007	-18.4424	-17.1359	-19.4754	-12.9237	-15.2001	-15.3237	-17.4092	-15.1073	-14.0422	-16.9733	-18.7314	-18.0067	-15.9426	-19.3701	-17.8702	-18.7175
361.5	608.5	11.1419	4.5698	-9.47625	-14.1774	-13.102	-15.6152	-14.4524	-14.0572	-14.4327	-14.762	-18.2309	-18.4008	-14.3724	-14.2933	-15.0838	-13.8125	-18.0589	-13.9479	-17.2071	-17.5803	-17.6242	-14.6952	-16.8149	-22.5974	-16.2691	-15.2743	-16.1302	-17.9141	-19.277	-14.1578	-18.5191	-14.2239	-20.2527	-17.0924	-18.0678	-13.0709	-21.2118	-16.8052	-18.0279	-16.6435	-16.5638	-15.4112	-15.7582	-18.981	-14.7139	-19.5186	-19.5465	-15.1317
362.5	608.5	11.142	4.5698	-10.3224	-14.443	-15.7463	-13.4987	-17.1305	-16.8375	-15.7012	-18.252	-16.2971	-16.6755	-14.0055	-14.1168	-17.7491	-14.4577	-16.0665	-12.3337	-17.0966	-18.6171	-17.914	-14.7419	-14.6507	-19.111	-16.8918	-15.0533	-16.3745	-18.748	-17.6613	-14.2884	-17.3577	-15.105	-18.395	-15.4409	-17.9921	-14.4898	-19.343	-14.9422	-17.2306	-15.5543	-20.3456	-15.63	-15.0678	-16.6086	-14.8799	-18.3149	-18.7142	-15.4182
357.5	609.5	11.1415	4.56971	-14.9998	-11.836	-13.5287	-11.8959	-14.8686	-14.2849	-17.3689	-15.5575	-17.6442	-14.1714	-13.6751	-14.8585	-10.5667	-18.692	-23.1132	-17.2354	-15.6686	-18.5894	-16.8778	-18.0572	-15.1348	-15.1281	-20.4315	-20.6422	-18.2319	-13.7587	-15.4871	-19.3806	-19.825	-16.6315	-18.4897	-16.6893	-13.2268	-15.8084	-15.9721	-20.2542	-16.969	-16.5434	-13.765	-15.3326	-15.0973	-16.1614	-16.324	-15.1079	-19.026	-21.1609
358.5	609.5	11.1416	4.56971	-15.4387	-12.4489	-12.9352	-13.3769	-15.4856	-16.5539	-16.131	-14.2122	-14.7927	-15.1585	-14.0567	-13.2025	-11.2833	-17.9595	-22.0453	-18.4847	-18.1053	-20.375	-17.0415	-19.1649	-17.8256	-15.778	-21.2012	-19.4041	-16.5802	-14.384	-14.6577	-19.8875	-20.386	-15.8792	-17.8059	-15.9755	-17.8923	-15.7025	-14.5428	-18.5017	-19.5188	-16.5701	-13.3314	-16.8933	-15.6612	-15.7758	-17.8155	-16.2529	-16.752	-19.6049
359.5	609.5	11.1417	4.56971	-14.2438	-13.3234	-11.7621	-15.5871	-16.0624	-18.1451	-14.0901	-12.9889	-14.2039	-15.0458	-14.0569	-12.7131	-13.153	-16.2769	-16.2157	-18.9473	-20.4103	-18.6097	-18.5959	-21.104	-21.9526	-17.1253	-19.6864	-17.4222	-17.1071	-15.8166	-14.9458	-20.7238	-22.4041	-14.6679	-15.6684	-17.4851	-20.6677	-13.2416	-13.6589	-13.2559	-16.3653	-16.1681	-14.3962	-24.7055	-14.8437	-16.7424	-16.4694	-17.7711	-17.1199	-22.3905
360.5	609.5	11.1418	4.56971	-10.9091	-13.4326	-11.699	-16.8173	-15.7821	-18.4055	-13.32	-13.775	-15.9862	-16.4263	-13.7723	-12.4429	-14.9665	-15.0578	-15.9211	-15.7063	-17.1977	-16.7326	-17.2722	-18.0135	-18.9329	-19.3819	-17.806	-16.5221	-17.8696	-17.3511	-16.0222	-18.0608	-19.4599	-15.14	-15.4609	-19.4243	-21.0796	-13.0808	-15.8302	-12.2065	-16.826	-16.9748	-15.6259	-16.7187	-15.3003	-17.5581	-15.7226	-17.8727	-19.5063	-19.5236
361.5	609.5	11.1419	4.56971	-9.621	-14.5422	-13.096	-15.1794	-15.4643	-17.3309	-14.2648	-16.9401	-18.0091	-18.2997	-12.901	-13.8773	-14.8539	-14.6485	-19.4747	-12.1417	-15.7733	-17.5714	-16.2296	-15.4575	-15.0011	-22.1052	-16.3515	-16.3484	-15.305	-18.3789	-16.4877	-16.5542	-17.4444	-14.7773	-15.8795	-16.9065	-18.1561	-13.3615	-20.2103	-15.02	-17.6133	-16.642	-18.1933	-15.1501	-14.9789	-17.5613	-13.6604	-20.4395	-21.6971	-16.7205
362.5	609.5	11.142	4.56971	-10.0273	-15.5407	-15.0712	-12.3001	-17.3999	-18.7465	-16.1297	-19.0189	-17.2485	-16.7072	-11.3602	-14.5676	-14.9308	-14.8049	-17.2158	-11.04	-16.5557	-19.4181	-18.2665	-16.4369	-14.2805	-19.6702	-15.4177	-16.8702	-13.8689	-19.0204	-15.7147	-15.1614	-17.1844	-16.4117	-17.0811	-15.324	-18.0286	-12.9733	-17.0856	-16.0776	-17.7441	-13.6228	-19.2649	-16.2734	-15.8573	-16.233	-13.5849	-20.7738	-18.224	-16.2648
359.5	610.5	11.1417	4.56962	-15.1897	-15.0331	-12.1833	-15.8781	-15.1728	-14.1818	-14.9127	-12.6772	-13.5524	-12.8298	-12.5466	-13.4722	-12.661	-14.6392	-14.353	-17.8456	-18.7776	-19.5266	-18.1142	-18.5682	-20.7727	-16.7563	-24.1415	-19.4644	-15.4882	-17.9012	-15.3477	-19.3151	-20.7455	-14.887	-14.9266	-16.9537	-18.7388	-15.7271	-14.6523	-13.9502	-15.3072	-15.7938	-14.283	-20.0059	-16.1461	-18.0992	-15.2476	-16.4633	-13.0916	-21.8986
360.5	610.5	11.1418	4.56962	-11.7128	-17.382	-13.3419	-18.4486	-14.7648	-15.4915	-12.8785	-14.1845	-15.5051	-13.2455	-12.6263	-13.5784	-15.3404	-13.3843	-13.8312	-14.8379	-16.5821	-16.8038	-16.3655	-15.5024	-17.4949	-17.1816	-21.4763	-17.7858	-16.0352	-17.5919	-14.6239	-21.1673	-16.3914	-15.2185	-14.4265	-21.0076	-21.283	-16.1752	-16.1042	-12.7845	-15.5408	-15.243	-16.3885	-15.5046	-13.3753	-17.8039	-16.0134	-17.0902	-13.8067	-19.6365
361.5	610.5	11.1419	4.56962	-10.3196	-16.9097	-16.1481	-15.8705	-15.7143	-16.6529	-12.8763	-19.1162	-16.155	-14.6155	-11.3471	-14.3862	-14.9808	-14.5133	-16.1795	-12.0372	-15.2115	-17.5739	-15.3397	-14.328	-14.3257	-20.4802	-18.4223	-16.3977	-15.3953	-18.2435	-14.3563	-19.2828	-15.7999	-14.7369	-13.6959	-17.8406	-16.7331	-11.8864	-16.1023	-14.5243	-17.3264	-16.0795	-17.8279	-14.5305	-14.3432	-16.8431	-13.904	-19.1924	-16.6725	-18.0403
350.5	620.5	11.1409	4.56874	-14.228	-16.4898	-13.0509	-17.588	-17.8575	-17.48	-16.2741	-14.5783	-14.5122	-14.7022	-13.2702	-18.6725	-21.1592	-15.0029	-20.142	-17.2094	-19.3254	-20.0187	-22.2401	-24.5739	-22.1538	-16.7156	-16.84	-18.1231	-19.7506	-16.3493	-19.8282	-17.839	-15.3856	-15.8083	-21.5682	-16.5961	-14.7108	-13.9918	-23.7707	-12.5917	-11.525	-15.4708	-16.5269	-16.9422	-22.3812	-17.5768	-21.0291	-19.0048	-18.0395	-17.4126
351.5	620.5	11.141	4.56874	-13.6241	-16.697	-13.1977	-18.3127	-15.2623	-16.579	-15.9716	-15.2927	-14.0872	-14.2314	-12.17	-16.9567	-15.1569	-16.2299	-23.1265	-14.8574	-18.142	-18.4165	-20.5418	-21.568	-19.9705	-16.4343	-19.5692	-17.5442	-20.9096	-18.4914	-18.5669	-17.1749	-14.9371	-18.0242	-20.3081	-16.188	-15.3647	-15.791	-24.3362	-13.2674	-12.3452	-17.3945	-19.5912	-16.4106	-18.9875	-21.0556	-18.4782	-18.5748	-17.0355	-18.3652
349.5	621.5	11.1408	4.56865	-14.1699	-17.4376	-13.9509	-15.295	-17.5021	-17.4221	-17.7062	-15.8041	-15.1635	-14.5416	-12.2853	-19.0681	-16.3291	-16.9246	-16.093	-16.4165	-18.1834	-19.4927	-20.544	-20.7489	-21.53	-17.5218	-15.6221	-20.6255	-22.9581	-15.4832	-16.2697	-18.1046	-15.3228	-12.3473	-16.409	-17.3458	-15.1748	-17.0361	-20.7531	-12.3092	-14.1231	-15.5133	-14.521	-16.2845	-16.1574	-15.0254	-18.956	-16.1609	-20.1614	-17.2425
350.5	621.5	11.1409	4.56865	-13.1649	-16.6014	-13.3891	-17.0362	-16.2892	-16.8655	-17.2937	-15.603	-14.2597	-14.2117	-12.4794	-19.7611	-14.3833	-15.5066	-18.4422	-16.1623	-17.9983	-18.9709	-20.275	-22.4534	-22.3731	-17.0499	-15.4093	-17.0174	-22.0981	-15.1635	-16.3128	-16.6356	-15.6927	-14.5797	-16.9214	-16.5498	-14.6988	-16.5109	-21.3478	-11.6831	-12.0699	-16.3679	-17.6984	-16.1027	-18.2839	-16.29	-18.7596	-15.5189	-19.5121	-18.0684
351.5	621.5	11.141	4.56865	-12.2666	-16.5703	-13.395	-18.3189	-14.9575	-14.7115	-14.1896	-16.3934	-14.6823	-14.5148	-11.2491	-18.7073	-12.5123	-15.4317	-20.0318	-15.0959	-17.7378	-17.8858	-21.0026	-23.3135	-20.567	-16.3056	-16.9962	-17.5285	-19.4092	-16.6627	-14.8983	-15.1264	-17.4146	-17.0121	-17.3526	-15.8832	-15.9677	-17.3772	-22.4123	-12.8971	-12.0351	-20.39	-23.8649	-14.8923	-16.7089	-19.842	-16.9861	-15.4493	-19.0943	-18.9963
348.5	622.5	11.1407	4.56856	-14.5955	-15.1567	-13.1305	-15.9391	-18.2855	-19.6796	-13.9049	-18.0107	-15.406	-13.9503	-13.9036	-18.9585	-14.7646	-17.2306	-16.3623	-14.8792	-18.2174	-17.3025	-19.3293	-17.5121	-21.3653	-22.9962	-17.3216	-26.8001	-20.638	-16.4052	-14.5153	-18.6764	-14.8216	-13.0995	-13.2771	-13.6959	-17.8617	-19.7502	-14.8642	-11.9859	-16.743	-15.3784	-17.2289	-16.5168	-10.7544	-18.2656	-18.006	-16.8431	-20.2074	-17.0238
349.5	622.5	11.1408	4.56856	-14.1888	-17.2484	-13.299	-15.9397	-18.1844	-16.5645	-16.3804	-17.9175	-17.4319	-13.8671	-13.3515	-15.7006	-14.2024	-17.3322	-16.7259	-15.7757	-19.0059	-19.1898	-19.2881	-18.2011	-18.4508	-20.2996	-15.8235	-17.6781	-23.4913	-15.6345	-16.5362	-18.477	-15.5714	-12.9593	-15.9212	-15.346	-15.745	-19.9683	-18.6948	-12.4181	-16.2503	-17.6149	-17.2636	-15.9277	-11.107	-16.9688	-17.3722	-15.9838	-18.9193	-16.8668
350.5	622.5	11.1409	4.56856	-13.9121	-16.2831	-12.6518	-16.953	-17.1369	-14.919	-16.2584	-16.2332	-17.5979	-14.3622	-13.0197	-15.1482	-12.7861	-18.2483	-17.2168	-16.6842	-18.793	-18.4983	-16.7261	-20.5065	-19.133	-19.6538	-16.5028	-14.9622	-20.8938	-15.285	-15.3298	-17.6694	-16.5321	-13.7477	-14.6768	-16.3641	-15.5374	-17.4547	-18.2213	-12.4901	-14.8422	-17.954	-17.8949	-15.4704	-14.0248	-17.0155	-18.8335	-15.1532	-18.1529	-19.1293
351.5	622.5	11.141	4.56856	-12.9635	-15.8091	-12.7104	-17.7982	-16.4329	-12.8839	-13.7186	-16.7679	-17.7294	-15.9248	-12.4316	-16.1391	-11.5222	-19.3386	-17.7142	-16.8706	-18.2938	-17.3261	-17.4126	-21.4842	-20.18	-18.784	-18.3225	-16.5841	-18.2493	-15.8514	-14.5514	-16.4618	-18.146	-14.5167	-14.4449	-15.9283	-16.0505	-15.6313	-19.7488	-13.5359	-12.4886	-21.5092	-18.5393	-14.6226	-14.8095	-18.3142	-18.3104	-15.3964	-19.1117	-19.0309
352.5	622.5	11.141	4.56855	-12.7145	-15.2611	-14.033	-15.4784	-16.5522	-11.8587	-12.9541	-17.932	-17.6771	-16.4017	-12.6123	-15.5945	-11.3222	-17.7098	-13.1931	-18.1979	-20.0923	-19.1943	-23.3156	-20.998	-21.0814	-17.5927	-20.0979	-20.4309	-17.8505	-16.305	-14.1783	-18.8566	-20.0867	-15.1559	-15.9826	-16.4444	-16.0608	-15.5346	-17.8494	-14.2319	-12.0202	-18.1564	-18.2303	-15.056	-15.0099	-17.4999	-16.2104	-17.0983	-21.1316	-18.3856
346.5	623.5	11.1405	4.56847	-13.5552	-12.3201	-15.9331	-16.669	-17.9288	-19.6998	-17.5738	-22.4948	-17.1991	-14.8131	-14.446	-15.1161	-12.4023	-12.9274	-18.6981	-19.7138	-19.0237	-22.1497	-16.7233	-16.1472	-22.2625	-22.2142	-17.8513	-23.3661	-22.116	-16.5381	-15.9039	-15.3108	-17.6958	-14.2483	-11.2649	-14.4206	-17.9807	-16.3216	-16.099	-13.5709	-17.0102	-12.3238	-15.8317	-16.5872	-14.7854	-16.3241	-20.5807	-18.8001	-15.985	-20.797
347.5	623.5	11.1406	4.56847	-13.4456	-13.3765	-13.698	-19.1436	-18.0491	-19.4742	-17.764	-20.6905	-16.1426	-15.1207	-16.1204	-16.9458	-13.1902	-13.1523	-20.5392	-16.9308	-18.3127	-17.5293	-20.0441	-17.0092	-24.052	-21.1549	-19.3702	-27.6468	-20.8372	-16.6116	-16.0746	-16.6294	-16.1326	-14.1216	-10.7915	-13.2215	-18.5258	-16.0321	-13.6368	-11.8155	-16.5046	-13.9913	-18.2976	-17.2635	-13.4114	-16.8346	-19.9673	-17.9241	-18.3096	-20.4206
348.5	623.5	11.1407	4.56847	-12.1252	-17.2379	-12.2022	-18.4826	-17.9788	-18.7082	-15.4487	-20.0029	-16.7911	-15.5132	-15.7026	-15.2114	-14.7246	-15.383	-21.7624	-14.9029	-18.2666	-16.5325	-23.5842	-17.5917	-19.7458	-23.1979	-18.8013	-25.4866	-19.9619	-15.674	-17.403	-17.6041	-14.2305	-13.7001	-12.8315	-12.7233	-18.9616	-15.9264	-15.5229	-12.3985	-17.4248	-17.3793	-19.0444	-16.8493	-11.6093	-15.3546	-18.6189	-17.027	-18.681	-18.5213
349.5	623.5	11.1408	4.56847	-13.9624	-19.9224	-12.5493	-17.638	-19.4048	-18.1304	-15.3478	-18.8225	-18.9682	-14.8802	-16.875	-12.5986	-14.0191	-16.3307	-17.1584	-16.7783	-19.5262	-17.4463	-19.9833	-18.5074	-17.3034	-21.4609	-18.2677	-18.5185	-18.8551	-15.0891	-16.7188	-18.6376	-15.8466	-14.1453	-16.7434	-15.2477	-15.1272	-17.8123	-18.8234	-14.2668	-18.8161	-18.0463	-17.0012	-15.5491	-11.0168	-18.2061	-19.0287	-16.6522	-17.6442	-18.7405
350.5	623.5	11.1409	4.56847	-14.9998	-17.5977	-12.1003	-16.8293	-21.1512	-15.3875	-14.8013	-17.0283	-21.5146	-15.1642	-15.1155	-11.9816	-13.9739	-18.7822	-17.1523	-17.6	-18.6736	-17.6567	-15.1651	-19.9946	-17.8113	-20.3785	-19.5342	-16.3567	-17.4991	-15.8959	-16.1419	-19.2787	-17.3105	-14.3039	-15.508	-18.4415	-14.8542	-14.2096	-19.4892	-15.9607	-16.9275	-17.1388	-17.2047	-15.6476	-12.1563	-19.3077	-21.4867	-16.7519	-16.8945	-20.0642
351.5	623.5	11.141	4.56847	-13.4156	-16.2157	-12.1806	-17.6185	-19.1485	-13.407	-14.2042	-16.6873	-19.7861	-17.3971	-14.2412	-12.5845	-13.0091	-21.3892	-15.6145	-17.8145	-18.5643	-17.3695	-15.2274	-20.8167	-19.5435	-19.7497	-22.7641	-16.7819	-18.2106	-15.8119	-16.6063	-18.6325	-15.6945	-15.1138	-13.976	-17.4761	-16.4835	-14.33	-21.2064	-15.4784	-13.5414	-19.965	-14.8179	-15.8465	-13.839	-19.1759	-20.1597	-16.6622	-17.5508	-18.594
352.5	623.5	11.141	4.56847	-13.4095	-14.6332	-13.6953	-15.9775	-16.602	-12.258	-14.2884	-17.435	-16.2688	-19.009	-14.3562	-14.7568	-11.9014	-17.2507	-13.3724	-17.9091	-20.1097	-18.6118	-18.3795	-22.9491	-20.4533	-17.9755	-21.8286	-18.3919	-18.9638	-15.6656	-15.0505	-19.9176	-15.4285	-14.9666	-15.4522	-16.897	-17.3846	-16.1311	-18.7532	-13.8068	-12.7915	-17.9871	-14.2782	-15.821	-16.1992	-20.3655	-17.3098	-16.558	-19.1486	-18.705
353.5	623.5	11.1411	4.56846	-12.2208	-14.6014	-15.6363	-13.937	-15.9355	-13.9188	-13.1783	-18.7625	-13.12	-15.2015	-14.7846	-14.3149	-13.6167	-13.0431	-15.0429	-14.6825	-19.5237	-19.458	-18.1983	-20.4286	-18.624	-18.9307	-18.8952	-16.9712	-17.8555	-16.5218	-14.2328	-17.4548	-15.572	-16.0111	-17.6238	-16.2296	-17.7866	-15.0621	-17.7629	-13.8915	-13.7383	-15.9044	-17.8467	-16.0677	-21.4191	-21.6277	-18.6579	-16.0977	-18.3381	-22.8582
347.5	624.5	11.1406	4.56838	-13.1256	-12.3914	-14.3503	-19.4212	-17.8192	-17.3131	-18.986	-22.2022	-18.9622	-17.5113	-17.2256	-15.1401	-16.7857	-14.0209	-25.8599	-17.3987	-19.1007	-17.3952	-19.8151	-17.8751	-21.0569	-22.2676	-22.6005	-23.7893	-19.2766	-17.8386	-16.3266	-14.7512	-17.4281	-14.5242	-10.6479	-15.758	-16.2255	-14.6831	-17.5007	-13.012	-17.052	-14.6855	-19.7416	-15.7815	-17.2493	-19.1316	-19.3408	-19.4084	-17.4006	-20.8162
348.5	624.5	11.1407	4.56838	-12.0858	-16.0215	-12.6911	-18.1658	-17.6705	-17.069	-16.2013	-18.6882	-19.4954	-16.5887	-15.5178	-12.4894	-16.3176	-14.7284	-19.6877	-16.3799	-18.248	-16.0379	-21.7767	-20.0589	-19.835	-22.3247	-19.3678	-24.1253	-17.3133	-18.2846	-15.0424	-14.3127	-15.8776	-13.9051	-12.9224	-14.3048	-15.7821	-13.845	-17.8611	-14.197	-16.6634	-15.4764	-16.2187	-14.7083	-15.4523	-16.8051	-21.0695	-18.2945	-17.8743	-21.8509
349.5	624.5	11.1408	4.56838	-13.6221	-17.6184	-12.2858	-17.534	-19.315	-17.0296	-14.816	-17.248	-19.5074	-14.3505	-15.4053	-11.4229	-14.2761	-14.8038	-16.048	-18.3416	-17.7498	-16.4294	-19.093	-19.9813	-18.591	-20.3262	-18.2237	-20.9233	-15.9915	-14.8626	-13.0931	-16.5124	-18.7004	-14.2009	-16.7919	-17.107	-13.1525	-12.8218	-19.2667	-17.5977	-20.1528	-13.7569	-16.011	-14.4093	-13.5343	-17.7128	-22.3194	-18.4206	-18.6986	-23.2664
350.5	624.5	11.1409	4.56838	-13.9115	-17.0099	-12.0258	-17.9303	-20.0396	-16.414	-14.1094	-17.1516	-18.6704	-15.1172	-14.6607	-11.8655	-13.4701	-16.3347	-16.0307	-17.9676	-16.505	-16.9685	-15.5463	-18.7108	-18.1469	-20.2813	-18.6817	-19.6692	-15.5535	-15.6456	-14.289	-17.7943	-17.31	-13.8681	-18.9363	-19.8622	-13.0957	-12.2151	-22.4586	-21.4638	-17.1332	-14.0796	-18.3358	-16.2575	-12.2971	-20.16	-23.1843	-17.1843	-18.6105	-20.4988
351.5	624.5	11.141	4.56838	-12.1192	-15.8901	-12.5586	-18.1727	-16.6244	-15.6756	-14.6303	-15.3721	-17.6532	-17.416	-14.0053	-12.2762	-13.3112	-16.9916	-14.1766	-18.3932	-16.7737	-17.4932	-15.76	-20.14	-19.2153	-19.735	-20.6185	-20.9182	-17.4003	-16.8073	-17.9959	-17.0989	-14.2017	-15.8759	-18.6728	-17.806	-15.2245	-13.1867	-24.271	-16.1552	-14.1676	-17.8724	-16.1182	-17.9551	-13.0165	-19.6027	-20.8136	-16.8221	-17.1107	-18.029
352.5	624.5	11.141	4.56838	-12.9945	-13.8756	-13.2606	-15.8621	-13.8222	-13.564	-14.6298	-15.9903	-14.7678	-17.3174	-14.7988	-14.5222	-12.5073	-14.543	-14.1612	-18.3442	-19.021	-18.4426	-17.38	-21.9713	-17.887	-18.2993	-20.2698	-20.5977	-20.4239	-15.5112	-15.178	-17.8659	-13.7669	-16.1933	-18.6956	-15.7902	-16.859	-14.5904	-20.4968	-12.8078	-14.0101	-18.573	-15.0014	-16.3402	-14.4648	-19.5199	-19.3928	-15.7765	-18.1358	-19.499
347.5	625.5	11.1406	4.56829	-14.4883	-11.9724	-14.6447	-15.7277	-18.7172	-16.6347	-16.9176	-19.283	-17.1131	-17.1567	-14.855	-13.2968	-18.3648	-15.5448	-21.937	-19.2467	-17.8557	-17.023	-18.6893	-18.0296	-19.2409	-22.0229	-20.6094	-18.7982	-20.3743	-17.6416	-15.9592	-14.5377	-17.6124	-16.0977	-11.1551	-18.2238	-16.4503	-12.8305	-16.0432	-13.8526	-14.7246	-16.7963	-16.8485	-15.2407	-19.6735	-20.331	-20.7159	-20.396	-16.2767	-19.2816
348.5	625.5	11.1407	4.56829	-14.1736	-13.674	-14.2483	-13.2927	-18.0538	-16.0097	-14.6529	-15.1199	-16.5713	-13.5183	-13.8672	-12.3378	-17.945	-14.4259	-17.1258	-20.4687	-17.8088	-16.5484	-17.6289	-22.5839	-20.0621	-22.852	-16.7905	-18.618	-18.044	-21.8958	-13.1083	-14.9639	-17.6592	-14.3167	-12.8846	-17.0546	-15.3842	-12.1922	-15.7216	-15.6147	-14.5989	-15.975	-16.4772	-13.9247	-19.7318	-17.4603	-20.5222	-19.5439	-15.7115	-19.1184
349.5	625.5	11.1408	4.56829	-14.0432	-14.7182	-14.047	-14.0257	-18.0723	-14.4876	-13.7341	-15.7759	-18.4028	-12.037	-14.3859	-12.4189	-14.8099	-13.4576	-14.8174	-17.868	-17.2341	-17.4181	-16.9167	-21.2038	-19.4685	-21.6285	-16.1511	-19.7843	-15.9781	-16.0719	-10.8904	-17.2326	-18.2263	-13.3622	-16.4516	-18.6652	-12.7569	-12.0892	-17.26	-17.202	-17.2679	-12.4168	-16.1813	-14.2776	-16.7377	-15.9105	-20.0724	-18.8192	-17.4394	-20.4919
350.5	625.5	11.1409	4.56829	-12.8577	-17.1024	-14.2248	-17.2672	-15.7977	-16.673	-14.6431	-18.6603	-18.7616	-13.1872	-13.4642	-13.6341	-13.2335	-13.784	-14.6662	-15.8489	-16.6832	-16.4374	-17.1815	-18.4372	-17.7857	-20.4814	-16.5485	-21.2504	-15.3373	-16.5648	-12.4458	-17.1611	-15.5661	-13.5833	-23.3268	-18.5889	-12.6675	-11.4477	-17.6649	-17.32	-16.3487	-12.3352	-17.8951	-16.8274	-13.41	-17.9078	-21.3915	-16.7149	-19.1446	-18.3223
351.5	625.5	11.141	4.56829	-12.2211	-15.6588	-14.7175	-17.6875	-14.476	-15.6647	-15.497	-15.8941	-16.5615	-16.0579	-12.3487	-13.3202	-12.9398	-13.3145	-14.0076	-16.2529	-16.9135	-16.2095	-18.3055	-19.2131	-17.4484	-19.4234	-17.5177	-21.6532	-16.8571	-19.6118	-16.4448	-16.4338	-14.8358	-15.1409	-21.9886	-18.0877	-14.6524	-12.419	-20.2294	-14.4086	-14.1497	-15.6945	-18.2696	-17.0852	-12.6282	-17.0608	-19.97	-17.2683	-17.6553	-17.6978
348.5	626.5	11.1407	4.5682	-14.6201	-13.9474	-13.9766	-11.4806	-18.3315	-14.5749	-14.6266	-12.8137	-13.6654	-12.5305	-12.3074	-10.142	-16.0295	-13.7936	-14.4906	-18.8981	-21.3241	-18.2928	-16.4302	-21.853	-17.5933	-21.0743	-16.3541	-15.1876	-17.4818	-19.221	-14.0432	-18.1929	-16.7293	-13.4924	-13.1291	-18.0625	-17.4661	-13.6655	-14.17	-15.4272	-13.7262	-19.2107	-17.0726	-17.0933	-22.6635	-18.2274	-16.4544	-19.3365	-14.3046	-17.5776
349.5	626.5	11.1408	4.5682	-13.5897	-13.0368	-15.9115	-12.3358	-18.1738	-13.2053	-15.1913	-14.9781	-16.9869	-12.9074	-13.932	-11.5803	-14.8095	-12.9721	-13.698	-14.5347	-19.9715	-20.1604	-18.2252	-21.0523	-18.723	-18.6828	-15.6639	-18.6622	-16.4696	-20.2808	-11.8073	-20.7527	-15.8996	-13.4393	-16.7667	-17.0489	-16.1751	-13.2572	-16.1173	-18.4905	-15.2655	-14.7696	-15.4663	-16.5455	-19.447	-16.4879	-17.4757	-17.0391	-15.2928	-17.7794
350.5	626.5	11.1409	4.5682	-13.405	-14.2349	-17.444	-16.2648	-16.1241	-14.1718	-16.3347	-18.5401	-17.239	-12.4644	-12.8428	-12.515	-13.8765	-12.6074	-14.3722	-12.6673	-19.4472	-16.748	-17.9664	-19.8105	-18.3207	-17.4614	-15.5919	-21.5972	-14.42	-19.5586	-13.3094	-18.7422	-16.3179	-14.4682	-18.883	-17.4823	-14.1844	-12.372	-15.5168	-16.8469	-14.6918	-13.6296	-16.3895	-17.2825	-15.4588	-16.0041	-21.8238	-17.2005	-15.7354	-17.4422
[truncated: 7 more columns]

## Sheet: CoAF
Pixel-X	Pixel-Y	Longitude	Latitude	Sigma0_VH_db_mst_07Apr2015	Sigma0_VH_db_slv1_25May2015	Sigma0_VH_db_slv3_06Jun2015	Sigma0_VH_db_slv5_18Jun2015	Sigma0_VH_db_slv7_12Jul2015	Sigma0_VH_db_slv9_24Jul2015	Sigma0_VH_db_slv15_05Aug2015	Sigma0_VH_db_slv17_17Aug2015	Sigma0_VH_db_slv19_10Sep2015	Sigma0_VH_db_slv21_22Sep2015	Sigma0_VH_db_slv23_04Oct2015	Sigma0_VH_db_slv25_16Oct2015	Sigma0_VH_db_slv27_28Oct2015	Sigma0_VH_db_slv29_21Nov2015	Sigma0_VH_db_slv31_03Dec2015	Sigma0_VH_db_slv33_15Dec2015	Sigma0_VH_db_slv35_08Jan2016	Sigma0_VH_db_slv37_20Jan2016	Sigma0_VH_db_slv39_13Feb2016	Sigma0_VH_db_slv41_08Mar2016	Sigma0_VH_db_slv43_20Mar2016	Sigma0_VH_db_slv45_01Apr2016	Sigma0_VH_db_slv47_13Apr2016	Sigma0_VH_db_slv49_07May2016	Sigma0_VH_db_slv53_19May2016	Sigma0_VH_db_slv55_31May2016	Sigma0_VH_db_slv57_12Jun2016	Sigma0_VH_db_slv59_06Jul2016	Sigma0_VH_db_slv61_18Jul2016	Sigma0_VH_db_slv63_30Jul2016	Sigma0_VH_db_slv65_11Aug2016	Sigma0_VH_db_slv67_23Aug2016	Sigma0_VH_db_slv69_04Sep2016	Sigma0_VH_db_slv71_16Sep2016	Sigma0_VH_db_slv73_28Sep2016	Sigma0_VH_db_slv75_10Oct2016	Sigma0_VH_db_slv77_22Oct2016	Sigma0_VH_db_slv79_03Nov2016	Sigma0_VH_db_slv81_15Nov2016	Sigma0_VH_db_slv83_27Nov2016	Sigma0_VH_db_slv85_21Dec2016	Sigma0_VH_db_slv87_02Jan2017	Sigma0_VH_db_slv89_14Jan2017	Sigma0_VH_db_slv91_26Jan2017	Sigma0_VH_db_slv93_07Feb2017	Sigma0_VH_db_slv95_19Feb2017
315.5	498.5	11.1379	4.5797	-12.4626	-13.3145	-11.728	-11.5962	-9.83401	-11.4102	-11.5043	-12.1821	-12.0322	-14.0415	-13.882	-14.8227	-13.2694	-13.0695	-16.5691	-17.6583	-15.2427	-16.3746	-17.7834	-16.1607	-8.44572	-14.5005	-16.9164	-16.5267	-18.6306	-16.2509	-20.4216	-26.4439	-16.3459	-14.757	-17.6405	-21.7232	-16.8882	-17.4734	-14.8321	-15.8848	-15.1014	-16.4046	-14.4401	-11.7462	-15.5731	-18.3004	-19.7936	-15.1316	-18.2629	-13.9184
316.5	498.5	11.138	4.5797	-13.6103	-12.8786	-11.1829	-12.1517	-10.0592	-12.631	-10.4567	-12.7936	-11.7695	-11.4705	-16.5613	-15.2708	-13.569	-14.5942	-15.2905	-15.9557	-15.544	-16.8545	-14.9633	-15.5587	-7.92888	-14.7321	-16.4598	-15.5986	-14.2318	-14.3013	-15.7161	-20.4111	-17.9463	-13.7955	-17.1392	-20.4919	-11.8027	-16.9812	-15.5526	-15.2113	-10.8008	-15.1787	-16.6399	-8.95291	-13.908	-14.7495	-16.1503	-14.0981	-17.6886	-15.054
317.5	498.5	11.1381	4.57969	-13.5321	-13.1971	-11.7789	-13.792	-9.81899	-15.5006	-11.8996	-15.1647	-12.7624	-11.2501	-14.3329	-15.3937	-14.4692	-19.3083	-14.4687	-15.1575	-14.8648	-15.7809	-13.442	-14.1905	-11.245	-15.5152	-17.7601	-15.4323	-12.4768	-12.9387	-18.4245	-15.7125	-18.1492	-13.4373	-13.5008	-14.7968	-9.56423	-17.7727	-14.5617	-15.7189	-8.95498	-12.0437	-14.1991	-8.84556	-13.9497	-12.3219	-14.7571	-11.9859	-16.9192	-15.5154
314.5	499.5	11.1378	4.57961	-11.6944	-13.1023	-9.21144	-10.6876	-13.7593	-11.6058	-13.5031	-11.1617	-11.3062	-14.657	-9.73369	-15.6236	-11.1416	-16.0256	-15.886	-16.4209	-15.1939	-18.2844	-23.5468	-16.8249	-15.7372	-18.6966	-16.8555	-21.0067	-18.7662	-16.4144	-20.9905	-22.6423	-16.0402	-13.1929	-16.2931	-22.0929	-17.6734	-15.662	-14.6942	-15.5933	-19.2294	-16.1405	-12.3139	-16.1508	-20.0191	-14.6928	-17.7338	-18.6288	-17.3192	-19.0554
315.5	499.5	11.1379	4.57961	-11.4049	-13.3274	-10.9567	-8.91334	-13.173	-11.6097	-11.8157	-11.2759	-12.2238	-15.2077	-11.1614	-15.6584	-11.0714	-13.9973	-17.0774	-13.9078	-14.5878	-15.2609	-19.2338	-14.6661	-11.4852	-16.8364	-14.9926	-19.0804	-18.9133	-17.1707	-22.5159	-24.1387	-15.7956	-15.7196	-18.1817	-21.8646	-15.362	-14.3643	-13.8503	-14.799	-16.7976	-15.5553	-12.5517	-15.1907	-15.1835	-15.7329	-17.7408	-17.6022	-17.7872	-16.2957
316.5	499.5	11.138	4.57961	-12.9886	-13.835	-12.7166	-10.8	-11.5913	-11.236	-10.8208	-12.9439	-15.3314	-12.1227	-12.821	-16.4731	-11.9126	-13.1622	-17.2343	-13.5668	-15.118	-14.7833	-15.1075	-13.4999	-10.9288	-15.2292	-15.4443	-16.9223	-17.5143	-16.0045	-23.345	-17.5476	-17.8579	-15.4366	-16.6977	-20.784	-12.9912	-14.7513	-13.8046	-14.7404	-11.6867	-17.2114	-14.0819	-11.7429	-12.5297	-15.7823	-16.1724	-16.4611	-17.5183	-17.2764
317.5	499.5	11.1381	4.57961	-13.5585	-15.2915	-12.7408	-14.4599	-11.4536	-13.1758	-11.9038	-15.0838	-16.4423	-11.0839	-12.7764	-16.6302	-11.9427	-15.4215	-16.3453	-14.4802	-13.6528	-14.2246	-13.1033	-12.4725	-13.9346	-15.0441	-18.3147	-15.7084	-15.6107	-15.1358	-21.24	-14.134	-19.8664	-13.2804	-14.681	-17.3626	-12.0295	-15.9929	-13.6741	-14.4529	-8.6525	-17.9769	-14.9561	-10.151	-12.0432	-13.9103	-14.2774	-13.6774	-16.593	-18.3259
314.5	500.5	11.1378	4.57952	-10.5131	-14.7011	-8.97745	-9.64151	-16.215	-11.8642	-12.1466	-12.128	-9.37081	-11.3903	-10.0762	-13.9705	-11.0986	-15.0485	-13.1535	-21.3909	-15.2685	-19.3567	-19.4886	-17.9123	-17.0739	-18.1666	-16.3892	-22.5799	-15.6945	-16.0753	-19.3614	-18.6719	-14.9964	-15.6299	-19.0466	-18.7691	-20.4486	-13.9918	-16.7977	-15.2208	-17.6188	-16.0233	-13.4299	-14.269	-17.397	-11.7465	-15.7553	-21.2167	-18.4791	-19.6752
315.5	500.5	11.1379	4.57952	-9.88091	-15.1747	-10.4318	-8.76551	-16.4247	-13.0528	-10.9358	-12.4246	-9.5547	-12.4871	-9.87167	-14.8544	-9.55942	-13.7537	-14.0791	-17.9448	-14.4816	-17.9738	-17.205	-15.3001	-14.2091	-17.6223	-13.725	-19.9265	-15.7821	-17.4647	-19.2629	-20.0523	-17.9315	-17.5355	-21.0407	-19.9462	-19.6663	-13.3646	-15.8972	-14.5051	-19.2004	-17.2055	-13.6541	-14.4158	-16.5753	-13.4247	-16.525	-19.8371	-18.182	-19.1456
316.5	500.5	11.138	4.57952	-12.1414	-14.7629	-12.4241	-10.0311	-13.5756	-13.2427	-12.0079	-13.3729	-14.1746	-13.1856	-10.7764	-17.0145	-9.84195	-11.6398	-15.5217	-15.3893	-15.2742	-15.1519	-15.2691	-14.4787	-13.2713	-17.3245	-14.0234	-15.5152	-18.4905	-18.6874	-19.2023	-15.3538	-20.8761	-16.8244	-19.4025	-18.0639	-17.4721	-14.2829	-13.9086	-14.1125	-14.8559	-18.1546	-14.04	-14.4312	-14.479	-16.2792	-15.7834	-15.3645	-16.9841	-19.5058
317.5	500.5	11.1381	4.57952	-13.3159	-15.1285	-11.9795	-12.5948	-13.2591	-14.0282	-13.6054	-13.521	-19.3588	-11.746	-12.1585	-16.3182	-10.7436	-12.5757	-15.7283	-14.9642	-14.7093	-12.5445	-13.0513	-13.56	-13.4872	-15.3475	-15.8199	-13.4116	-18.8263	-19.1546	-18.5116	-13.3419	-22.1342	-15.0106	-14.775	-17.2027	-16.015	-16.4251	-13.5285	-13.9409	-12.6413	-20.6794	-17.0475	-13.4624	-12.3922	-15.4101	-15.6873	-13.2672	-15.8601	-21.4482
314.5	501.5	11.1378	4.57943	-12.7191	-15.9145	-10.9407	-9.75567	-15.6634	-12.8001	-12.7521	-13.1838	-9.57612	-11.1153	-11.9869	-14.3471	-12.4068	-14.9408	-12.8358	-18.1321	-13.2013	-16.9214	-17.829	-17.3402	-17.2833	-16.7178	-18.8868	-23.82	-16.6656	-17.414	-17.3057	-16.9182	-14.4249	-17.4765	-17.4639	-15.3813	-17.4891	-13.6027	-19.22	-17.2012	-15.2329	-16.8046	-15.7874	-14.5434	-14.3307	-11.9267	-13.0673	-15.3092	-17.3917	-17.7787
315.5	501.5	11.1379	4.57943	-12.6997	-15.0771	-11.3265	-10.5893	-16.8381	-15.3947	-11.2179	-14.4505	-9.29979	-12.1091	-11.1746	-14.4922	-10.2379	-13.0938	-13.3485	-17.356	-13.2722	-17.7747	-15.4636	-14.5081	-13.0613	-14.9551	-15.293	-22.723	-17.5032	-17.3597	-15.5401	-18.5112	-16.9567	-18.6624	-21.8758	-17.3182	-20.0192	-15.6855	-21.4537	-18.6423	-16.5621	-18.9632	-16.0264	-13.9472	-16.3897	-14.6596	-14.724	-17.722	-18.9728	-18.73
316.5	501.5	11.138	4.57943	-13.3532	-14.0537	-11.1601	-10.5191	-12.4741	-14.9119	-12.7958	-14.3716	-12.3823	-13.7366	-10.8891	-15.5763	-10.4094	-10.4123	-13.5095	-19.6904	-12.8629	-14.5481	-13.4783	-13.2386	-10.2401	-15.9045	-14.5023	-15.7028	-18.3154	-20.6065	-15.7609	-16.1072	-20.536	-19.0924	-20.5164	-17.0698	-19.5517	-19.3518	-17.9882	-18.7922	-18.2694	-19.9185	-15.882	-14.4547	-17.3453	-19.75	-15.0909	-17.2316	-17.6396	-22.7483
317.5	501.5	11.138	4.57943	-12.2073	-14.0729	-10.0714	-10.3189	-12.7511	-15.3139	-16.3387	-13.5701	-15.0728	-13.4983	-11.4458	-13.5056	-12.1867	-11.5343	-14.4141	-15.8954	-13.533	-12.4717	-11.7235	-13.9487	-9.81031	-16.7621	-14.9486	-12.8875	-18.1533	-20.9791	-15.8866	-14.3012	-21.896	-17.2258	-15.7624	-15.9065	-16.8978	-20.5314	-15.2423	-16.8952	-15.9949	-17.8863	-16.8342	-15.7312	-14.5434	-17.3805	-14.5806	-14.4914	-16.5367	-23.7681
318.5	501.5	11.1381	4.57943	-13.2593	-15.8558	-10.9569	-11.9259	-14.0174	-16.8577	-18.6748	-13.9791	-14.2914	-12.2997	-13.4674	-10.7062	-13.4185	-15.2811	-14.0361	-15.8747	-14.9866	-11.6619	-14.4127	-14.1445	-11.7401	-16.5507	-12.8203	-13.6272	-16.2058	-17.4628	-15.2946	-14.7105	-18.3622	-17.5615	-14.634	-15.2454	-15.5687	-20.3634	-14.1326	-16.1712	-14.8805	-17.0781	-18.2119	-14.6717	-14.6706	-14.6635	-13.3144	-14.7054	-16.0165	-18.79
314.5	502.5	11.1378	4.57934	-14.4525	-16.602	-14.0753	-10.7048	-14.3683	-15.2318	-13.7947	-15.1206	-11.4388	-13.1455	-13.9521	-12.9073	-15.3344	-17.0574	-15.3743	-16.1963	-12.3502	-13.9788	-15.42	-13.6592	-16.1932	-16.2079	-15.4065	-20.6478	-15.2891	-16.9688	-14.7223	-16.716	-17.3564	-18.7671	-17.6002	-15.1965	-16.8846	-14.5692	-18.3727	-20.6503	-14.3717	-20.0074	-17.0944	-14.2563	-12.9641	-15.1312	-13.3175	-14.2754	-15.1768	-18.9516
315.5	502.5	11.1379	4.57934	-15.4674	-14.896	-12.5794	-14.1792	-15.5589	-16.6981	-14.2439	-15.0452	-11.302	-12.8632	-13.7977	-13.5022	-12.5431	-14.6182	-13.7748	-16.7752	-12.082	-11.4369	-13.8592	-12.8236	-13.3166	-14.7087	-15.7571	-20.1501	-17.6924	-17.0872	-13.9406	-18.1278	-18.8519	-19.6151	-19.6511	-17.5673	-21.6018	-18.0289	-21.1286	-25.4642	-14.6991	-21.1437	-16.2562	-15.5002	-15.3982	-16.1706	-14.0304	-15.9024	-16.1624	-16.239
316.5	502.5	11.138	4.57934	-13.4455	-13.325	-11.1621	-13.3172	-11.8208	-14.0844	-15.061	-13.213	-14.9152	-13.9901	-12.1174	-14.9421	-12.823	-11.9028	-13.4519	-18.935	-10.9162	-11.4258	-10.8562	-11.6076	-9.96815	-14.6655	-14.8847	-14.2733	-18.9917	-20.7303	-13.5633	-19.5258	-21.1789	-19.6411	-24.0324	-17.7944	-23.097	-17.8217	-17.9525	-25.9774	-18.3321	-19.5265	-16.6452	-16.0245	-17.7278	-19.3737	-14.8607	-17.4384	-15.8503	-18.0057
317.5	502.5	11.138	4.57934	-11.5803	-13.4222	-9.68322	-10.5947	-11.8498	-13.2893	-17.9848	-13.082	-15.148	-13.8689	-12.1694	-12.4391	-15.4991	-12.6158	-13.9745	-14.2846	-11.5699	-12.1411	-9.54966	-12.6064	-9.09582	-16.3129	-14.3872	-12.6785	-17.2641	-21.2136	-14.1751	-17.4196	-19.7693	-16.7211	-17.6393	-15.7625	-15.5988	-18.788	-15.3207	-18.644	-16.1628	-16.8225	-15.3452	-15.4745	-16.9027	-17.6807	-14.541	-15.2721	-16.2416	-18.2956
318.5	502.5	11.1381	4.57934	-12.6067	-14.2975	-11.3329	-10.3737	-15.1754	-15.1758	-18.6937	-13.8019	-13.9322	-13.4855	-14.0001	-9.26161	-17.1179	-15.1937	-12.7999	-13.6818	-13.6035	-11.1936	-12.2223	-15.3765	-11.071	-17.0974	-11.6616	-13.2482	-17.1955	-16.2697	-14.8577	-15.3532	-15.6975	-16.0101	-16.0816	-13.5748	-13.4652	-18.4202	-12.7103	-17.3874	-13.151	-15.1451	-15.3252	-14.3035	-16.9461	-14.9711	-12.5149	-14.7178	-15.8405	-14.6952
287.5	545.5	11.1353	4.57552	-15.334	-17.9734	-14.843	-14.78	-16.1876	-15.5488	-16.6952	-12.5593	-17.9813	-14.0445	-13.0125	-13.6137	-15.3183	-16.7649	-13.0996	-14.0165	-14.7326	-15.8294	-14.1274	-17.4813	-13.0328	-15.7326	-16.1647	-14.8092	-11.832	-11.7992	-18.3003	-13.8956	-13.0751	-18.3931	-17.3971	-12.4168	-13.8194	-17.1346	-15.8705	-11.7877	-17.5531	-15.268	-12.2194	-12.904	-14.7946	-12.5874	-13.6979	-10.2402	-18.3612	-11.9111
288.5	545.5	11.1354	4.57552	-15.5536	-18.2039	-15.7067	-17.0872	-16.3129	-16.5414	-15.904	-12.7227	-18.1438	-12.6919	-11.7767	-13.7011	-16.3194	-21.4609	-13.2298	-13.3064	-14.3873	-16.6931	-15.8103	-18.5431	-12.0144	-13.0981	-15.8718	-13.0571	-12.8144	-13.3507	-16.6143	-15.4204	-15.7546	-17.0723	-15.9546	-15.1724	-15.4578	-18.8389	-16.3988	-12.5763	-15.9139	-17.8926	-15.2996	-14.2528	-14.2707	-11.851	-12.6541	-11.3866	-16.4565	-12.7008
289.5	545.5	11.1355	4.57551	-15.2971	-15.369	-16.6333	-18.1875	-16.864	-18.1569	-15.4536	-13.8675	-14.9313	-12.4648	-12.5023	-13.0985	-16.3029	-21.6047	-14.0979	-15.7604	-14.2885	-16.6636	-18.0567	-16.6775	-14.049	-13.366	-16.9101	-14.3764	-14.6339	-14.5002	-15.0695	-14.1539	-15.0783	-18.1158	-12.7581	-17.4206	-17.7639	-14.1463	-14.4268	-12.4703	-14.123	-15.5491	-17.9833	-12.8534	-13.7258	-13.264	-10.6996	-13.0888	-15.4201	-13.772
290.5	545.5	11.1356	4.57551	-15.7893	-13.1443	-17.1508	-16.9609	-17.0277	-16.8211	-14.1773	-15.4413	-12.8132	-13.5449	-13.4159	-12.4761	-16.6242	-19.6491	-15.9118	-15.1534	-16.3825	-16.5312	-17.2587	-16.9893	-16.7181	-15.7475	-17.0329	-14.5732	-13.8749	-15.4058	-12.6551	-14.2786	-14.4665	-18.0093	-14.28	-17.116	-17.3662	-13.4513	-11.2257	-12.0346	-15.3191	-15.1984	-16.9956	-13.4195	-15.1471	-11.7072	-12.6618	-10.8575	-14.0472	-13.8011
310.5	545.5	11.1374	4.57549	-15.6563	-8.02441	-13.7552	-11.6822	-11.1922	-16.1913	-10.5964	-13.1252	-12.2549	-11.1419	-12.8436	-11.8104	-11.1597	-11.3038	-17.3945	-13.4338	-12.9053	-21.4262	-13.0415	-15.9135	-18.1962	-15.2398	-15.9489	-14.4358	-14.2923	-13.8976	-12.0878	-13.7742	-10.311	-12.729	-12.9972	-10.3576	-14.3737	-13.4757	-13.1173	-11.783	-10.902	-7.82399	-13.0296	-14.2617	-8.47853	-11.8502	-10.9632	-13.5378	-15.4974	-16.9754
311.5	545.5	11.1375	4.57549	-13.8834	-14.3811	-13.1867	-15.5065	-12.9645	-14.036	-13.1942	-15.7662	-14.3547	-11.655	-13.5057	-18.6963	-14.1115	-13.6163	-14.6494	-16.0267	-12.2893	-16.9145	-14.1592	-14.9152	-15.5074	-14.8747	-16.557	-13.8304	-14.778	-13.0468	-13.4153	-13.2283	-10.8689	-11.1414	-12.4168	-11.3646	-14.056	-15.0222	-11.6169	-11.3262	-10.8103	-9.54223	-12.5976	-19.0825	-9.52119	-12.6991	-11.0056	-13.5651	-15.6033	-19.0261
312.5	545.5	11.1376	4.57549	-11.6514	-17.5577	-16	-13.0677	-11.5973	-13.7226	-13.4736	-14.0471	-16.137	-13.7143	-15.9445	-14.8541	-16.5654	-12.3361	-12.7648	-15.7812	-10.0856	-12.5546	-13.9321	-13.885	-13.5737	-14.4551	-14.4108	-15.0641	-14.8131	-11.8101	-15.0644	-14.1813	-11.7687	-9.97283	-12.4497	-13.382	-12.8504	-16.385	-12.3191	-11.4964	-10.6057	-12.2987	-14.6473	-14.8741	-10.8358	-14.837	-12.8866	-14.3118	-15.9386	-18.5162
313.5	545.5	11.1376	4.57549	-11.9371	-17.9375	-16.6723	-15.3948	-13.6513	-12.3837	-13.5205	-12.7743	-17.6211	-13.7169	-17.8273	-15.8779	-16.2099	-9.81641	-12.4398	-15.0555	-10.0712	-11.0955	-12.311	-13.7133	-13.6397	-14.8858	-11.4432	-17.5399	-10.9601	-10.2197	-15.601	-17.3361	-11.5888	-9.35495	-12.4919	-15.5302	-12.5661	-14.6218	-12.4243	-11.6941	-10.2668	-12.0161	-15.496	-11.8493	-11.3146	-14.326	-14.6766	-15.6971	-15.1668	-17.3911
314.5	545.5	11.1377	4.57549	-11.5138	-16.5211	-19.5409	-19.359	-16.4369	-12.658	-15.8372	-15.8559	-24.375	-16.6199	-23.0446	-18.3594	-21.2826	-11.6186	-12.5149	-17.321	-15.1149	-10.385	-12.181	-11.9664	-12.1448	-15.1912	-10.4853	-14.8737	-9.65054	-9.5481	-13.998	-14.9895	-10.5099	-9.62133	-11.7253	-13.5295	-11.6604	-13.3627	-10.8638	-11.2684	-10.0189	-9.96985	-14.3802	-10.3708	-13.0902	-10.2431	-14.1681	-14.3685	-14.4139	-16.3901
286.5	546.5	11.1352	4.57543	-14.4279	-19.8791	-14.5204	-14.2849	-17.4498	-16.9364	-18.6973	-14.7351	-14.46	-18.0374	-12.8654	-14.4654	-16.1656	-15.6946	-12.4426	-13.0025	-12.7689	-13.3457	-13.048	-13.7308	-14.732	-17.8543	-12.1258	-16.1991	-12.0885	-11.5772	-15.7913	-11.4858	-13.3231	-18.3468	-16.2302	-13.0826	-14.2722	-15.0448	-12.9802	-10.6258	-15.1843	-13.4261	-14.0408	-13.8526	-13.8522	-15.491	-19.1738	-10.594	-13.5556	-13.9993
287.5	546.5	11.1353	4.57543	-14.9926	-22.3762	-15.2616	-14.5118	-16.0605	-16.9335	-20.6512	-13.8027	-15.178	-15.9548	-12.1229	-15.859	-18.4718	-15.9694	-13.1627	-13.1453	-12.2618	-18.6616	-11.5389	-16.1476	-13.8994	-16.4378	-13.2742	-17.9061	-13.0045	-11.5479	-14.2317	-12.8835	-13.9409	-18.1484	-16.9304	-13.6549	-13.9177	-17.2262	-17.0419	-11.7259	-15.9479	-16.4913	-15.1873	-13.9255	-14.46	-13.7316	-16.5562	-9.1927	-16.7411	-15.0168
288.5	546.5	11.1354	4.57543	-12.931	-19.0542	-16.1541	-15.826	-15.9231	-16.7076	-16.5156	-14.3199	-17.1169	-15.4781	-12.2206	-15.2118	-17.6384	-19.7971	-14.3577	-14.2365	-13.434	-17.9702	-14.3648	-15.6165	-12.8124	-13.4689	-14.1857	-15.0596	-13.6056	-13.8043	-12.9224	-14.824	-17.3138	-16.358	-15.2275	-16.2283	-16.8607	-14.6926	-17.9839	-14.6218	-15.9678	-17.9115	-16.4386	-14.5277	-15.5919	-14.0629	-14.6042	-11.0476	-14.6923	-16.9669
289.5	546.5	11.1355	4.57543	-14.3437	-15.1604	-17.1941	-17.2396	-16.6901	-16.5427	-14.6363	-15.1755	-14.6086	-15.4307	-13.523	-14.1343	-16.6664	-19.5926	-14.093	-15.5217	-15.96	-15.2931	-16.7833	-14.7427	-14.6617	-13.9501	-15.7617	-15.1181	-14.2747	-16.3191	-14.0463	-14.7731	-16.9841	-17.3642	-13.1647	-17.357	-19.3685	-12.6993	-15.5917	-16.3242	-14.9572	-16.7229	-17.5018	-13.9829	-13.839	-12.527	-13.0677	-13.4438	-12.4537	-15.3694
290.5	546.5	11.1356	4.57542	-16.1309	-13.1011	-18.2175	-18.1021	-17.9808	-15.4638	-13.5421	-15.5592	-13.8545	-14.4324	-14.5608	-13.6876	-16.0763	-20.7487	-15.4617	-14.9512	-19.2976	-16.6849	-15.9511	-16.1617	-14.8526	-16.1728	-18.7708	-15.2155	-14.8585	-15.3419	-13.2062	-14.8371	-14.9216	-16.1976	-12.1397	-16.2318	-15.9001	-13.7696	-12.4866	-15.4211	-17.2449	-14.6938	-18.9364	-15.2612	-14.6037	-10.0747	-15.0249	-12.0916	-11.8876	-12.7603
291.5	546.5	11.1357	4.57542	-16.7808	-12.4222	-17.813	-15.9055	-16.434	-13.119	-13.5361	-15.1098	-13.531	-13.4089	-14.2379	-14.2783	-15.669	-19.5721	-18.0024	-14.9706	-24.1062	-17.936	-17.5228	-16.3056	-17.801	-19.0861	-20.61	-12.9658	-12.5862	-15.939	-12.9718	-16.5133	-16.0352	-16.6718	-11.5673	-16.0624	-11.4699	-13.2436	-12.2482	-12.9678	-17.0197	-11.232	-15.9971	-17.0358	-17.9935	-10.945	-12.8224	-13.0281	-12.5525	-10.8996
310.5	546.5	11.1374	4.5754	-14.0213	-8.80128	-13.82	-11.0174	-9.57398	-16.0663	-10.4325	-13.4656	-13.308	-11.2088	-13.152	-12.4176	-10.9769	-13.2487	-15.0318	-14.5012	-13.9337	-19.6554	-12.2614	-16.614	-18.1208	-14.2233	-12.8948	-14.7415	-14.1697	-15.0466	-12.4926	-14.2768	-12.3768	-10.5247	-13.2366	-14.6966	-15.4307	-13.3725	-14.6534	-16.0002	-10.9685	-8.89689	-13.7661	-13.4363	-10.8546	-14.8549	-15.048	-15.6029	-15.9592	-19.2561
311.5	546.5	11.1375	4.5754	-11.938	-13.6949	-12.9741	-13.5239	-11.254	-14.2189	-13.5465	-14.3118	-15.0677	-11.977	-15.3944	-18.6504	-15.0823	-13.2647	-15.1006	-16.3179	-13.6906	-18.5309	-13.1855	-17.6856	-17.2082	-14.3792	-14.7945	-13.8389	-17.3809	-13.1544	-12.579	-14.5453	-14.2864	-10.0647	-13.4986	-13.954	-16.2861	-15.0696	-13.7276	-15.0375	-11.3089	-11.7319	-12.8372	-13.1283	-11.2366	-13.8497	-15.1349	-15.7957	-16.8905	-21.4749
312.5	546.5	11.1376	4.5754	-11.1555	-16.7105	-15.6563	-12.1597	-10.2255	-12.6892	-13.3644	-13.16	-18.2634	-15.2219	-15.7012	-17.7206	-15.5319	-11.0618	-14.9091	-16.1759	-11.4949	-17.0244	-13.0641	-14.6965	-14.3449	-15.7594	-15.2928	-14.2116	-15.3504	-11.9725	-12.7801	-16.6928	-15.294	-10.0623	-14.6635	-14.2541	-13.8269	-16.6216	-14.4311	-14.164	-11.6502	-13.7985	-15.2158	-12.5003	-12.5283	-14.4424	-15.9283	-16.3394	-17.594	-17.6025
313.5	546.5	11.1376	4.5754	-12.4151	-15.3102	-18.2656	-13.5334	-10.5437	-13.2969	-11.3143	-12.9508	-19.7723	-18.1109	-16.0925	-17.1827	-14.8528	-8.891	-13.9646	-16.2507	-11.0794	-15.9505	-11.7867	-14.2412	-12.2373	-16.4716	-13.3095	-15.7616	-12.3746	-10.8077	-13.5992	-18.4646	-13.3949	-10.3486	-15.4215	-13.902	-12.56	-16.6026	-15.8276	-11.8449	-10.8005	-13.3762	-17.5714	-10.8639	-12.9999	-13.5081	-16.1425	-17.05	-17.8777	-15.4839
314.5	546.5	11.1377	4.5754	-11.0681	-14.438	-18.6538	-18.0145	-14.4375	-15.655	-13.3027	-16.6337	-21.3392	-20.76	-18.9061	-17.6605	-19.3948	-11.676	-13.5204	-15.7741	-14.7511	-13.652	-11.6041	-11.7801	-12.0603	-14.7524	-13.8044	-11.7662	-10.6676	-9.61775	-13.9699	-16.7998	-11.2887	-11.0467	-14.1016	-12.3673	-11.7115	-16.1675	-14.1274	-10.4018	-9.92408	-11.0286	-17.7761	-10.4061	-12.9542	-11.2525	-15.0446	-15.6311	-17.0912	-15.8581
286.5	547.5	11.1352	4.57534	-16.8257	-20.2802	-14.7166	-15.8512	-20.719	-17.5317	-17.9451	-14.9547	-15.0049	-16.0024	-13.0052	-17.5917	-19.25	-17.614	-12.7849	-13.0876	-11.7217	-11.9677	-12.3311	-12.4669	-13.4724	-17.9742	-11.7937	-13.5932	-11.3088	-11.474	-15.3256	-11.3975	-13.1017	-18.0322	-18.1482	-15.4707	-14.7724	-15.3278	-12.6203	-10.0408	-14.7607	-15.7576	-19.1964	-14.365	-13.5348	-13.9296	-20.4123	-11.0726	-13.6277	-11.8589
287.5	547.5	11.1353	4.57534	-15.699	-19.4319	-14.4071	-14.915	-18.0049	-17.1095	-21.101	-15.3568	-15.4896	-15.1455	-11.6898	-19.3691	-20.3272	-17.4837	-11.4706	-14.6667	-11.3403	-13.1637	-11.6768	-15.939	-14.124	-15.5398	-11.7069	-17.9247	-14.3757	-12.2457	-13.7329	-12.5773	-13.4246	-18.1285	-16.2736	-15.1071	-15.8344	-14.76	-17.5595	-11.315	-16.276	-16.6722	-18.0721	-15.8579	-14.6476	-14.9393	-18.1353	-10.1579	-15.447	-12.68
288.5	547.5	11.1354	4.57534	-11.5152	-17.0215	-14.1586	-15.417	-17.2658	-16.4341	-18.01	-16.5931	-18.3251	-16.0957	-11.0916	-14.9695	-17.2497	-18.9417	-11.9093	-15.4177	-12.892	-13.1184	-14.3934	-14.4895	-14.8345	-12.6948	-12.6266	-15.7974	-14.2863	-14.4259	-11.3675	-16.3473	-17.4617	-16.0219	-14.3562	-16.0648	-21.063	-13.5233	-18.2738	-14.4592	-18.0519	-16.8897	-15.6153	-17.0269	-16.84	-16.9671	-15.821	-12.8627	-12.4653	-13.3351
289.5	547.5	11.1355	4.57534	-12.3335	-15.1478	-14.9876	-15.8733	-18.1135	-15.7999	-15.6479	-16.5556	-19.1985	-15.188	-11.7774	-13.3004	-14.8641	-18.7503	-13.3676	-15.9053	-14.8966	-15.2208	-15.4462	-12.4319	-15.8285	-15.1315	-14.6194	-16.6961	-13.5095	-13.8249	-12.2488	-14.8876	-17.3049	-16.7619	-13.786	-14.6492	-19.1405	-15.0658	-16.0221	-16.0717	-15.3744	-16.3669	-15.2771	-14.8983	-15.273	-13.5422	-15.331	-15.8517	-10.2728	-14.9581
290.5	547.5	11.1356	4.57533	-15.4434	-13.8503	-15.846	-17.1825	-18.5975	-15.1229	-14.4114	-14.7357	-17.0706	-13.3914	-11.8065	-12.8927	-13.9191	-17.6889	-14.409	-15.5775	-17.7052	-19.1512	-14.8715	-13.8229	-15.4311	-19.3185	-19.7496	-18.9411	-16.5735	-14.1544	-13.5039	-14.4501	-15.319	-16.6925	-13.2158	-13.899	-15.3298	-12.9082	-14.3831	-15.1296	-14.5001	-14.6229	-17.0496	-16.1208	-14.503	-12.1344	-17.2394	-14.0224	-10.6079	-13.1658
291.5	547.5	11.1357	4.57533	-17.1204	-13.1688	-16.6047	-19.0421	-16.2351	-13.5786	-13.8158	-13.5701	-15.579	-12.2783	-11.6378	-13.5042	-13.115	-17.0543	-18.9194	-16.6708	-23.8152	-23.3206	-16.1684	-16.9975	-19.668	-20.3464	-23.2312	-15.4456	-14.703	-17.4858	-14.3354	-14.4056	-16.4252	-17.1031	-13.7847	-14.9609	-12.2396	-10.9064	-12.7405	-13.5184	-15.6316	-12.0482	-16.8155	-18.605	-17.395	-12.3425	-13.8471	-13.52	-12.6525	-11.2601
310.5	547.5	11.1374	4.57531	-12.9281	-9.98196	-14.174	-12.1797	-9.50098	-16.8508	-12.0532	-11.5666	-14.2825	-11.9387	-14.8275	-10.7328	-8.64867	-14.0812	-12.86	-16.8125	-14.6532	-16.1186	-13.6894	-14.8578	-16.2467	-11.9668	-12.1088	-18.0769	-14.3639	-13.7452	-13.009	-13.0481	-14.2497	-11.4788	-11.5207	-14.9282	-14.4947	-12.2808	-14.1245	-15.901	-12.9778	-11.1399	-13.5918	-15.9255	-13.8304	-18.388	-17.1651	-15.9806	-16.5033	-18.2647
311.5	547.5	11.1375	4.57531	-10.1219	-12.9928	-13.0099	-12.5836	-11.6936	-14.3148	-13.5622	-12.3453	-14.8207	-14.2474	-18.3183	-16.2227	-13.5138	-12.7761	-12.8689	-17.2575	-14.8645	-15.4287	-15.1828	-18.8084	-16.9716	-11.6566	-15.1151	-16.6274	-14.3188	-13.4316	-12.9217	-13.988	-15.6961	-10.6854	-12.6166	-14.7149	-14.4651	-12.4877	-14.8046	-14.1939	-12.5015	-12.3856	-14.1473	-14.752	-12.2767	-16.1647	-16.7996	-16.4826	-17.7558	-18.5618
312.5	547.5	11.1376	4.57531	-10.0275	-15.5315	-14.6189	-12.455	-10.7552	-12.4436	-12.8664	-12.5327	-18.7792	-18.7629	-14.6798	-17.7049	-15.4412	-11.398	-13.2669	-16.2469	-15.2933	-16.3744	-15.5842	-18.3353	-15.8443	-15.6405	-16.2288	-15.2077	-14.1104	-13.326	-13.0988	-15.4282	-15.7024	-11.1669	-14.4569	-14.4239	-13.9049	-13.0252	-15.4758	-12.2031	-11.2535	-13.4201	-15.3166	-11.7986	-11.3361	-15.0044	-17.2205	-17.5639	-19.4163	-18.5635
313.5	547.5	11.1376	4.57531	-12.2769	-12.3319	-14.3061	-13.6694	-11.3052	-14.8593	-11.3752	-14.4196	-27.9143	-20.7853	-13.783	-15.3977	-15.2601	-9.71295	-13.3375	-16.0155	-14.8341	-16.9083	-12.6579	-15.5686	-13.8634	-17.7668	-15.3341	-16.333	-14.7928	-13.4123	-14.3035	-15.6613	-14.1247	-11.8753	-15.5949	-13.9406	-13.063	-15.5881	-13.7564	-10.0883	-10.5654	-13.5504	-16.6857	-10.4084	-10.6506	-14.0206	-14.8571	-18.737	-19.3827	-16.175
314.5	547.5	11.1377	4.57531	-11.6228	-12.626	-19.1869	-16.6248	-15.3259	-18.1034	-13.3257	-16.5368	-21.7391	-20.9971	-16.3438	-15.7205	-17.5755	-12.3562	-13.6218	-14.7836	-14.7367	-15.1993	-11.044	-12.0729	-13.5107	-14.4904	-15.4627	-14.711	-13.5915	-10.6672	-15.4204	-16.1074	-12.9353	-12.7753	-12.8958	-11.6518	-12.4295	-16.2224	-12.8492	-8.65893	-11.0056	-12.0216	-17.4053	-10.2246	-9.82454	-11.9522	-13.3374	-17.0517	-19.144	-14.9473
290.5	548.5	11.1356	4.57524	-15.0086	-13.4644	-13.2977	-17.4195	-19.4758	-15.5168	-15.8165	-15.2655	-17.3976	-12.5964	-9.98795	-12.2934	-13.1377	-15.5321	-14.4395	-15.2252	-15.0987	-20.6215	-12.8815	-15.8035	-15.7797	-18.2925	-17.5859	-17.195	-16.3014	-15.8041	-15.0399	-12.0777	-16.2656	-15.9724	-14.9388	-11.9329	-16.3727	-11.2774	-16.2686	-13.5301	-13.7273	-13.3873	-14.5335	-16.2275	-13.9705	-17.6516	-15.5552	-14.9582	-11.305	-13.9633
291.5	548.5	11.1357	4.57524	-17.1509	-12.5128	-13.6038	-17.6882	-17.2382	-14.5929	-13.4904	-13.9116	-14.9864	-12.3942	-10.0165	-11.8516	-11.9169	-14.1431	-20.8836	-19.0308	-21.7374	-25.9484	-15.457	-18.0248	-20.4633	-19.0585	-17.0566	-15.9202	-19.4006	-15.3657	-14.9897	-11.6677	-18.2513	-19.607	-17.0824	-13.2559	-15.4831	-11.0188	-13.9362	-14.4218	-13.3195	-13.274	-16.1415	-19.0807	-16.3661	-16.4679	-16.5588	-14.6008	-12.5618	-13.8341
310.5	548.5	11.1374	4.57522	-12.8122	-11.196	-14.4881	-16.1722	-11.3897	-14.8666	-13.2211	-10.7245	-14.5324	-12.0963	-15.4074	-10.9372	-11.4454	-13.0371	-12.9961	-15.5026	-14.0853	-13.511	-14.8573	-14.6008	-15.7994	-11.9279	-14.5864	-21.3259	-15.4661	-11.2818	-12.3903	-11.5961	-13.7793	-13.271	-11.7626	-13.6866	-14.015	-10.4973	-13.8259	-13.9587	-13.58	-12.9957	-14.8876	-16.6404	-16.5144	-15.2523	-16.2415	-16.4291	-19.5538	-17.5147
311.5	548.5	11.1375	4.57522	-10.5921	-13.5548	-14.6239	-14.7736	-13.9331	-14.2568	-13.0238	-11.9473	-15.6563	-15.9921	-20.8053	-16.9368	-15.3168	-12.4963	-12.1259	-14.9141	-16.8498	-12.9219	-14.2102	-17.3097	-17.1268	-12.0953	-18.3996	-17.7063	-14.8812	-11.1686	-12.8031	-11.9332	-14.6895	-12.1837	-13.1087	-13.7502	-13.1913	-10.6705	-15.7143	-15.2957	-12.4336	-12.2637	-15.077	-15.5699	-15.1243	-14.5447	-15.3636	-18.0472	-19.7413	-16.0796
312.5	548.5	11.1376	4.57522	-10.3879	-16.8628	-14.6596	-15.1506	-12.8168	-12.4914	-11.6841	-13.2807	-18.1365	-17.5487	-16.7253	-19.062	-17.5105	-13.2776	-12.0597	-14.5046	-18.0846	-13.3538	-15.1872	-18.9557	-17.1646	-14.6173	-18.2533	-15.7824	-14.6873	-11.6233	-14.0507	-12.3971	-13.2958	-11.8844	-14.7274	-14.742	-12.6842	-12.9757	-16.2854	-14.0769	-11.4683	-11.317	-15.1104	-13.2602	-13.9996	-15.4789	-15.1192	-18.7654	-23.1426	-15.5106
313.5	548.5	11.1376	4.57522	-11.5132	-11.6071	-11.6701	-14.3684	-15.1161	-14.2961	-12.5355	-16.9176	-18.2375	-16.2446	-14.5842	-16.4934	-15.67	-11.6253	-12.7918	-14.5934	-16.4835	-14.1247	-13.6899	-16.0583	-15.4926	-16.2702	-15.514	-15.7611	-16.5745	-13.0497	-15.6591	-12.7694	-13.4781	-12.521	-14.7827	-15.5861	-12.5211	-14.3062	-13.9274	-10.4078	-10.7982	-11.5427	-14.6658	-11.4883	-12.432	-14.6751	-13.2172	-19.2219	-27.0828	-14.5029
314.5	548.5	11.1377	4.57522	-12.9232	-11.1623	-16.0371	-15.462	-16.6392	-15.567	-15.4401	-16.7777	-20.007	-16.7336	-16.056	-16.4395	-15.3982	-12.9771	-12.8815	-14.2841	-13.8654	-15.0089	-10.3718	-12.4064	-12.5589	-13.92	-13.3543	-15.3573	-17.2055	-12.1054	-15.7319	-13.4164	-14.7173	-14.2337	-13.2985	-14.1912	-13.0477	-12.2815	-12.2367	-8.62756	-12.2286	-11.6867	-15.2762	-10.6764	-10.4443	-13.0525	-11.4108	-17.3086	-21.8099	-13.06
301.5	687.5	11.1364	4.56279	-15.6493	-10.4502	-15.8968	-15.0358	-15.0224	-16.383	-14.5806	-13.1789	-13.9712	-11.7469	-10.6767	-13.1463	-13.5571	-14.9206	-14.2213	-14.3982	-13.0725	-11.6401	-14.7956	-16.432	-14.6042	-15.3887	-17.0813	-19.1497	-19.0255	-13.1553	-12.241	-13.7789	-20.8913	-16.5398	-15.0351	-17.4424	-15.2748	-16.3084	-15.0245	-18.4508	-13.4227	-15.0559	-14.1152	-15.6913	-17.898	-12.9062	-14.434	-18.2751	-13.4018	-14.6793
300.5	688.5	11.1363	4.5627	-16.1953	-14.3454	-15.9936	-15.6818	-13.9544	-16.8882	-16.2256	-16.1709	-15.5405	-11.8333	-11.3722	-17.9945	-13.7132	-17.3408	-10.7397	-15.0494	-9.88133	-9.86402	-15.6077	-13.3084	-16.5561	-12.59	-15.0946	-15.4636	-14.2853	-14.5031	-11.6271	-13.5103	-16.822	-15.1345	-13.8894	-15.4978	-15.7611	-15.8308	-14.5872	-17.4517	-15.0992	-14.3191	-15.0984	-12.4029	-15.5595	-14.6037	-16.0753	-15.347	-18.5457	-10.7953
301.5	688.5	11.1364	4.5627	-14.3938	-12.3871	-13.7479	-14.0834	-14.1806	-15.9664	-15.3613	-13.8078	-15.3612	-10.3131	-12.4456	-14.6868	-14.2503	-15.9322	-11.2315	-15.6103	-10.5125	-11.007	-17.4811	-14.1019	-17.4143	-15.9459	-16.6399	-17.5649	-14.0102	-18.4874	-12.2756	-16.0867	-18.6798	-14.8796	-12.9863	-17.4472	-13.7412	-16.8609	-15.5848	-20.7147	-14.7547	-17.7321	-15.0846	-15.297	-18.0462	-14.5493	-14.7155	-16.6157	-15.8148	-11.143
302.5	688.5	11.1365	4.5627	-10.2769	-11.9344	-12.3275	-15.4348	-14.9135	-13.6198	-14.5202	-13.0974	-14.0614	-10.9684	-12.3952	-11.4233	-13.9043	-18.4913	-13.8042	-20.8307	-12.164	-13.8194	-14.3209	-17.0312	-18.0719	-20.4112	-17.3287	-18.0741	-16.0639	-18.8689	-12.7954	-18.5949	-16.7142	-16.3985	-13.9022	-16.5444	-13.6626	-17.3124	-16.3354	-18.0361	-16.356	-17.422	-16.5952	-16.4173	-15.2827	-14.5098	-15.1702	-15.3821	-14.1397	-15.9472
299.5	689.5	11.1363	4.56261	-15.3663	-16.8482	-13.618	-16.0503	-15.6873	-16.2044	-17.9489	-14.6872	-16.0544	-17.063	-12.2478	-16.0352	-12.4592	-18.2281	-13.2531	-12.6669	-9.54958	-10.5816	-12.308	-14.0412	-15.2055	-12.8191	-12.5301	-12.2695	-15.6432	-14.9973	-11.4376	-12.9735	-17.4494	-13.797	-11.5305	-12.207	-16.6315	-15.9862	-15.3568	-15.6745	-12.9554	-12.2382	-14.4068	-12.2228	-13.7144	-15.1907	-19.3037	-12.4581	-19.5465	-12.4493
300.5	689.5	11.1363	4.56261	-14.926	-16.1012	-12.7958	-15.261	-14.685	-16.0633	-18.1014	-16.6909	-15.8278	-12.8216	-12.2767	-15.6446	-13.72	-17.8237	-9.86167	-13.135	-8.95434	-10.0794	-16.3671	-13.0728	-16.8524	-11.4809	-13.0053	-12.5703	-12.6293	-12.947	-12.497	-14.7315	-16.6813	-15.5662	-12.3824	-16.751	-14.9869	-17.0795	-16.0364	-14.6564	-16.0946	-13.1396	-15.7563	-12.9316	-14.7644	-16.8226	-16.0917	-12.76	-18.7945	-9.52264
301.5	689.5	11.1364	4.56261	-13.7735	-15.4304	-11.5743	-14.4371	-15.2596	-16.0649	-15.6365	-14.5286	-16.613	-11.3861	-13.5191	-12.3573	-15.352	-16.6919	-9.92648	-15.5642	-9.03416	-10.7101	-17.0623	-13.1266	-19.4009	-14.9095	-15.5141	-15.1953	-11.5711	-13.884	-11.655	-17.6097	-18.1539	-14.8609	-12.8519	-18.7071	-13.3063	-17.3418	-17.2151	-14.7481	-16.834	-14.8238	-16.5386	-16.4346	-15.9099	-16.8057	-13.7618	-13.2984	-14.648	-10.2474
302.5	689.5	11.1365	4.56261	-11.7674	-15.0683	-10.7199	-15.8854	-17.0169	-16.4253	-13.1738	-12.0379	-15.2474	-10.681	-14.2468	-9.8893	-15.1014	-17.5536	-12.0016	-19.5463	-11.1726	-12.2004	-13.4389	-15.1348	-19.2599	-20.1122	-19.8383	-19.1091	-13.6318	-16.8926	-11.0958	-16.6647	-17.8381	-16.2314	-13.6712	-16.9486	-13.4513	-17.8273	-18.8608	-16.2982	-18.1874	-14.7278	-17.3463	-17.5559	-14.9305	-14.1944	-14.8251	-14.3342	-13.5141	-14.6626
303.5	689.5	11.1366	4.56261	-10.948	-15.0069	-10.3827	-13.9335	-18.389	-17.7449	-13.3346	-10.851	-13.9576	-10.2017	-14.166	-9.81995	-13.4492	-16.05	-14.0435	-15.3978	-16.7493	-14.1361	-14.6164	-15.422	-18.307	-13.914	-20.6454	-17.2514	-15.7643	-18.6412	-12.9109	-16.1519	-16.4797	-18.1614	-14.7297	-18.042	-14.7846	-18.3215	-22.0603	-16.8152	-15.7988	-13.9927	-16.437	-19.0599	-14.5122	-14.9955	-17.6571	-14.428	-14.2623	-12.853
300.5	690.5	11.1363	4.56252	-14.9182	-16.4104	-12.5143	-16.1712	-14.5485	-18.1374	-16.9676	-16.231	-15.0133	-16.1863	-13.1435	-16.0146	-14.4563	-20.945	-11.0859	-11.2718	-8.22487	-11.4711	-15.1849	-13.7177	-14.5113	-11.0946	-11.7903	-12.8578	-10.7208	-11.9812	-11.7286	-14.7925	-15.0978	-16.4657	-13.1058	-16.6547	-15.1887	-16.7874	-16.4701	-11.3157	-16.1038	-11.015	-14.9846	-14.4784	-12.4982	-15.3575	-12.1759	-12.3779	-14.4727	-11.4446
301.5	690.5	11.1364	4.56252	-14.7116	-15.2739	-11.4421	-16.1052	-15.5392	-17.3386	-14.7159	-14.9159	-15.4108	-14.6978	-13.9806	-13.5217	-16.6179	-16.2066	-11.0169	-13.3853	-8.25506	-9.9796	-15.9431	-13.2024	-16.167	-12.5195	-14.6352	-14.2932	-10.4209	-12.9751	-10.653	-14.5848	-16.327	-17.2564	-13.7748	-16.7169	-13.0939	-16.2486	-20.1464	-12.2824	-17.6012	-11.4732	-17.853	-15.2522	-12.6472	-16.5281	-12.0086	-12.2813	-11.4693	-12.0897
302.5	690.5	11.1365	4.56252	-14.9656	-13.221	-10.8775	-13.9901	-18.5814	-19.7035	-13.1542	-13.0485	-14.6108	-13.1581	-15.8462	-10.8134	-17.342	-15.4121	-11.8998	-16.1875	-10.1185	-10.8059	-13.8883	-14.0862	-15.7977	-15.647	-20.1137	-18.2162	-12.9807	-16.0369	-11.2317	-13.4214	-18.6734	-17.9556	-12.9802	-14.9288	-13.7591	-16.3072	-20.4563	-16.4051	-17.4072	-13.0395	-18.8154	-14.0006	-13.9781	-14.8472	-13.6906	-13.1497	-12.1824	-13.2561
303.5	690.5	11.1366	4.56252	-15.0132	-13.1562	-10.573	-10.7695	-18.5777	-21.9871	-14.0504	-12.7423	-13.9667	-11.2998	-15.788	-10.4736	-14.4567	-15.2766	-13.0718	-14.7763	-12.7776	-14.0876	-14.4903	-13.548	-16.1908	-13.0457	-18.9264	-20.5334	-15.7777	-16.575	-13.8341	-13.657	-19.4291	-17.8302	-13.6261	-14.6021	-15.2326	-16.4241	-20.2667	-20.0763	-17.5418	-14.6745	-16.7949	-14.4734	-14.4789	-15.2386	-16.7288	-13.9334	-14.0886	-13.3187
304.5	690.5	11.1367	4.56251	-13.5749	-14.3706	-13.2655	-9.6821	-15.618	-18.6559	-15.4005	-13.1074	-14.0375	-10.1246	-13.1142	-11.8654	-11.5468	-14.5377	-14.0139	-14.8591	-15.5111	-17.2737	-16.1503	-13.5291	-14.1051	-12.8172	-17.4583	-18.305	-18.0576	-17.8241	-16.2741	-14.5827	-17.7109	-17.5963	-16.6003	-15.1922	-16.0046	-16.9482	-20.4784	-22.8923	-17.3791	-16.1219	-15.4115	-15.5149	-13.9014	-15.9162	-16.5568	-14.0329	-13.3358	-14.4491
300.5	691.5	11.1363	4.56243	-14.9304	-17.3582	-14.6391	-16.3383	-13.89	-19.7369	-15.383	-16.6734	-14.9502	-17.7636	-14.2805	-17.0044	-16.1711	-21.3514	-13.3556	-11.4657	-8.93457	-11.4014	-12.9138	-14.6806	-13.645	-11.1982	-12.3064	-15.249	-9.45685	-11.2088	-9.45481	-14.6335	-13.8963	-16.2198	-13.7779	-14.9839	-13.4325	-15.0311	-18.8551	-9.22361	-15.2302	-11.0682	-15.4014	-13.8945	-10.7991	-14.5269	-9.83892	-13.4973	-11.8332	-12.8256
301.5	691.5	11.1364	4.56243	-15.1415	-17.4784	-13.0881	-16.8504	-14.9216	-16.5895	-14.3768	-16.6263	-16.0773	-15.8268	-15.0226	-16.2689	-17.8421	-14.3936	-14.1788	-12.3043	-8.90647	-9.32812	-15.6914	-13.1184	-14.4676	-11.6773	-14.9928	-15.3322	-10.0413	-11.8627	-10.1889	-12.9793	-14.9781	-15.5741	-13.6444	-15.6608	-12.9194	-14.5943	-19.9322	-11.0825	-16.317	-11.4836	-18.0036	-14.0341	-10.5374	-16.8811	-10.7802	-12.8928	-10.0894	-13.3116
302.5	691.5	11.1365	4.56243	-15.4885	-14.6095	-12.7627	-13.4134	-18.2615	-16.4805	-14.9137	-16.0121	-16.4242	-14.4009	-19.4077	-14.4012	-18.3815	-14.3923	-13.9242	-14.2513	-10.1142	-10.9749	-15.03	-13.0493	-15.0895	-13.9983	-17.8212	-17.8256	-12.6072	-14.0127	-13.9213	-11.9614	-17.1674	-17.905	-12.2367	-13.867	-14.6845	-15.3477	-18.3325	-13.5439	-15.7632	-13.4875	-16.3096	-12.5417	-12.5091	-17.3661	-12.0794	-13.3648	-11.7489	-14.4291
303.5	691.5	11.1366	4.56243	-17.9299	-13.7036	-11.5812	-10.6599	-16.7761	-18.9662	-17.6806	-18.6344	-16.5157	-13.3081	-17.2425	-13.4341	-15.7736	-15.9069	-13.5274	-14.8469	-11.2402	-14.8047	-13.4523	-12.4383	-15.1565	-13.4268	-16.2479	-19.8604	-14.612	-14.0342	-15.6232	-12.4538	-16.8024	-19.0134	-12.6494	-12.9373	-15.8164	-14.1535	-18.4483	-16.8329	-17.1441	-15.7193	-14.1148	-12.6152	-12.4487	-15.7548	-13.5682	-14.0339	-13.9233	-13.4578
301.5	692.5	11.1364	4.56234	-14.0413	-16.8682	-14.3703	-17.4308	-15.7392	-15.6745	-15.2916	-17.9141	-14.7655	-15.5768	-16.4812	-17.866	-20.829	-13.6164	-17.1162	-14.3408	-11.8594	-10.0134	-15.1758	-12.4461	-14.6875	-12.6702	-16.8916	-15.9831	-10.1305	-11.141	-10.557	-13.5869	-15.7119	-14.3881	-14.6271	-15.981	-12.0967	-14.4551	-15.8426	-11.3168	-14.7849	-13.5062	-15.7381	-15.5456	-10.1723	-14.1042	-11.024	-13.5045	-11.1736	-12.857
527.5	416.5	11.1569	4.58682	-13.374	-13.7626	-14.002	-11.4784	-11.5282	-14.0519	-16.0109	-11.9153	-17.1648	-16.352	-13.0424	-12.0853	-12.7076	-11.4686	-14.7214	-21.2867	-18.7114	-17.4813	-15.4791	-17.0876	-14.1955	-11.2821	-17.243	-16.4292	-12.4139	-16.1559	-16.2954	-13.894	-13.5593	-11.9067	-9.55078	-16.4381	-10.8461	-15.6206	-10.411	-10.8087	-11.763	-12.8819	-12.4959	-14.3439	-16.6168	-12.6577	-14.518	-12.9045	-12.9851	-14.3258
528.5	416.5	11.157	4.58682	-13.0945	-12.3084	-13.8061	-11.2933	-13.0257	-16.4264	-15.0425	-9.83799	-13.3527	-18.0309	-11.5077	-12.8872	-12.5456	-12.5667	-14.531	-17.6225	-20.2916	-17.4959	-16.3548	-19.2445	-14.0889	-12.7112	-16.8539	-16.3457	-11.6718	-12.5723	-15.9327	-15.1585	-13.3191	-14.5425	-9.77967	-15.8187	-15.9421	-15.116	-10.6307	-11.4207	-9.66452	-10.9797	-11.9507	-14.2108	-16.7045	-11.7137	-18.5698	-11.3564	-12.7003	-12.427
529.5	416.5	11.1571	4.58682	-14.3871	-12.7671	-12.7554	-13.2927	-15.3604	-15.9992	-15.5837	-11.5166	-13.4461	-21.425	-13.9451	-15.287	-12.2681	-13.7746	-16.0961	-15.7079	-16.9269	-16.4918	-17.8355	-15.8124	-13.2028	-15.7416	-14.8708	-15.0999	-12.6716	-11.019	-16.3734	-17.0677	-13.6215	-17.685	-13.7166	-14.7482	-19.0028	-15.6105	-12.8053	-15.5304	-9.72402	-11.182	-14.6811	-12.4824	-15.4283	-12.8584	-18.6711	-11.3187	-14.3874	-13.2531
530.5	416.5	11.1571	4.58682	-14.7714	-14.6678	-13.6423	-15.2874	-17.0392	-15.2005	-13.8078	-12.2315	-14.3398	-18.3944	-18.3005	-17.0408	-11.6895	-13.486	-15.504	-13.5432	-15.9814	-15.6145	-15.978	-12.1246	-13.6193	-16.8784	-13.8636	-16.4897	-16.0777	-12.8968	-14.9924	-17.1793	-13.0895	-18.2998	-15.5255	-16.7177	-18.1311	-15.6364	-17.0395	-17.1204	-12.6567	-15.1882	-14.7133	-12.3989	-14.7918	-14.173	-16.245	-13.8602	-14.8743	-15.3997
531.5	416.5	11.1572	4.58682	-12.9765	-15.4084	-15.4583	-15.6505	-16.342	-15.5451	-12.6337	-10.6067	-12.4003	-14.7503	-16.404	-16.3495	-11.0972	-13.7001	-13.1827	-13.1077	-14.7929	-19.2119	-14.4793	-9.40953	-17.0035	-16.106	-13.4685	-11.1693	-18.7574	-16.4148	-13.1005	-15.9204	-13.1558	-16.2495	-18.0897	-15.9878	-15.46	-13.5218	-13.3814	-17.3153	-17.962	-16.3931	-15.4702	-13.9529	-16.9279	-15.3207	-16.1197	-13.7478	-16.7695	-16.7859
527.5	417.5	11.1569	4.58673	-12.0727	-12.661	-16.793	-14.1204	-9.70265	-15.1879	-14.0809	-10.9415	-14.8635	-15.4633	-13.6829	-10.4058	-12.1766	-11.3652	-13.5135	-17.7624	-15.2921	-17.5843	-18.0754	-19.7455	-13.1645	-14.01	-16.1638	-15.2286	-11.6402	-20.8444	-15.1616	-14.2903	-13.025	-13.6035	-10.438	-17.2529	-12.2125	-18.864	-12.8454	-11.9656	-10.5166	-16.1711	-16.7719	-15.165	-16.482	-14.7658	-12.0961	-17.7629	-11.9421	-13.4083
528.5	417.5	11.157	4.58673	-12.3426	-11.5726	-16.2525	-13.473	-10.1835	-15.2482	-11.8365	-9.12705	-12.7443	-15.7669	-13.011	-12.0588	-13.2524	-11.3654	-14.6633	-15.5082	-16.6557	-17.8663	-17.4061	-17.3512	-13.0224	-15.6954	-14.697	-15.9526	-10.4864	-15.5557	-14.3792	-15.1854	-14.6825	-15.3182	-9.23512	-18.1644	-15.8745	-19.3388	-13.0741	-11.7331	-8.77203	-14.1789	-14.9557	-15.0723	-14.1213	-14.4308	-14.8516	-13.8531	-11.2475	-12.9086
529.5	417.5	11.1571	4.58673	-14.9284	-12.5157	-14.2937	-14.3582	-13.7224	-13.6411	-13.469	-11.1423	-13.7509	-17.9683	-14.1862	-13.5831	-14.3221	-11.0398	-15.2456	-12.4605	-16.3954	-15.5483	-17.7086	-15.0976	-12.7393	-18.6073	-13.5989	-15.7025	-11.4084	-12.3856	-14.4416	-15.8164	-15.3925	-18.1201	-11.396	-18.0126	-18.7151	-15.6189	-14.6768	-14.1554	-9.52497	-15.3113	-14.8286	-14.8914	-12.1938	-17.295	-16.6518	-11.9135	-14.3599	-15.1662
530.5	417.5	11.1571	4.58673	-13.25	-16.2913	-13.5973	-13.8683	-15.6395	-14.0382	-14.0515	-13.163	-15.0838	-16.6166	-18.1126	-14.7192	-13.7085	-11.0122	-13.6832	-10.6551	-15.9587	-16.0382	-17.502	-12.3058	-13.8828	-16.8328	-14.4017	-15.4131	-15.0548	-13.2723	-14.4565	-15.3696	-14.212	-17.4842	-13.4706	-18.4496	-15.8155	-12.7249	-16.4759	-16.6322	-13.1355	-19.0405	-14.1339	-14.613	-12.9498	-19.2402	-15.0459	-14.732	-15.8184	-17.5322
531.5	417.5	11.1572	4.58673	-12.3421	-16.046	-15.4443	-14.3187	-14.9566	-14.4821	-11.2422	-12.2454	-14.4722	-13.6312	-16.7141	-15.7353	-13.0485	-13.6895	-11.9104	-11.1706	-16.4536	-17.3106	-16.46	-9.893	-15.6227	-15.1809	-14.9378	-9.92065	-18.3305	-15.1242	-13.3338	-14.0799	-13.7679	-15.1526	-15.3972	-15.789	-13.8492	-12.2483	-13.6132	-18.8834	-15.7811	-18.0736	-15.0458	-15.8144	-15.9093	-17.7324	-15.0838	-15.1366	-15.135	-18.9758
527.5	418.5	11.1569	4.58664	-12.1736	-12.0129	-16.1285	-17.3607	-10.5632	-15.8533	-13.5278	-11.2496	-15.0113	-15.2228	-15.6934	-9.67637	-9.66127	-11.8672	-12.5382	-14.6749	-12.4708	-13.6545	-20.6782	-18.3031	-14.2624	-16.5269	-15.423	-14.5355	-12.6337	-16.0261	-12.5989	-14.3585	-13.2135	-16.2882	-11.6417	-14.0099	-12.9195	-18.7434	-16.7551	-13.9916	-11.1235	-17.4992	-18.9364	-16.8278	-14.4652	-17.2265	-11.5229	-16.2824	-12.1655	-12.6458
528.5	418.5	11.157	4.58664	-11.7786	-10.2661	-16.8296	-15.2256	-9.6665	-14.1322	-12.0744	-9.26966	-13.3797	-13.8883	-14.8997	-10.7886	-12.4725	-12.5721	-14.4397	-14.2944	-13.8646	-14.4352	-18.7659	-17.2669	-13.5061	-16.8135	-14.8723	-13.5735	-11.3796	-16.0622	-14.0161	-15.2929	-15.2705	-16.5758	-10.2761	-14.5411	-15.6029	-16.3541	-16.811	-13.5339	-9.96842	-18.0729	-15.3732	-15.2466	-11.355	-18.0668	-12.8549	-14.6242	-12.23	-12.6303
529.5	418.5	11.1571	4.58664	-12.7147	-12.0461	-16.2398	-13.8688	-11.8191	-12.7878	-12.4243	-11.8494	-13.379	-14.703	-14.1522	-13.4261	-18.5512	-11.4698	-15.7587	-12.5181	-14.6508	-13.7295	-17.1185	-15.6708	-14.582	-15.8767	-13.9303	-13.4835	-11.96	-14.2907	-14.133	-15.2814	-16.1633	-16.7704	-11.2745	-14.5968	-15.7384	-13.5271	-16.3109	-14.3754	-11.4012	-18.7214	-14.2928	-14.9343	-9.53389	-17.9352	-14.8031	-13.3259	-15.9428	-14.708
530.5	418.5	11.1571	4.58664	-11.8982	-17.7221	-14.6859	-13.4481	-13.892	-13.0488	-13.1016	-16.6956	-13.8156	-15.4508	-17.9989	-14.7845	-16.8336	-10.8294	-14.3394	-10.2889	-14.1121	-14.2593	-16.7934	-13.3198	-16.3579	-13.6962	-14.0022	-13.6981	-14.8205	-14.1269	-14.6108	-14.1522	-14.458	-16.4372	-13.2546	-14.589	-13.5027	-12.7138	-16.3107	-15.3482	-13.7533	-21.5344	-14.4948	-16.4817	-10.5839	-17.3087	-15.3059	-14.9421	-18.6811	-15.1983
531.5	418.5	11.1572	4.58664	-11.1348	-14.5324	-15.804	-13.9856	-14.056	-13.806	-10.7966	-15.1799	-14.1929	-15.2894	-17.754	-16.0164	-16.9919	-12.635	-12.2588	-10.8856	-14.1163	-14.3149	-16.2273	-11.4571	-16.2524	-12.6679	-13.8845	-11.0466	-19.1865	-14.18	-14.7843	-12.5082	-13.7979	-14.8745	-14.5624	-14.3086	-13.5268	-13.5696	-14.8586	-16.0204	-15.1134	-21.0336	-15.0318	-17.5191	-13.4566	-16.6765	-15.6871	-16.3499	-16.3653	-17.9938
528.5	419.5	11.157	4.58655	-12.2454	-10.7809	-14.9721	-14.9067	-11.0663	-14.1189	-13.8308	-11.2588	-16.3937	-14.0146	-17.3414	-10.5842	-10.2027	-13.374	-15.5621	-13.0427	-14.9759	-12.6386	-17.1425	-17.1919	-16.2388	-17.575	-12.1334	-15.587	-13.9766	-13.6879	-14.6212	-16.0885	-15.9442	-18.2464	-12.2591	-13.4528	-14.8051	-15.333	-15.0185	-14.2124	-12.6746	-17.1439	-15.2102	-16.7463	-10.2346	-18.5351	-14.1397	-13.7536	-15.8912	-12.4643
529.5	419.5	11.1571	4.58655	-12.452	-12.3287	-16.9917	-14.7421	-11.4759	-14.2288	-13.9905	-12.3143	-14.91	-12.9816	-16.1652	-12.7585	-15.1578	-13.7488	-16.4745	-12.9987	-15.3919	-12.9868	-15.9924	-18.6266	-16.6011	-17.0808	-13.6135	-14.1136	-14.0861	-14.9429	-14.4093	-14.9311	-17.1339	-17.0222	-12.9414	-13.0039	-15.9682	-14.0747	-15.0092	-14.2695	-13.3119	-16.5681	-15.2558	-16.1846	-9.26381	-16.5996	-15.1335	-13.856	-16.1831	-13.0993
530.5	419.5	11.1571	4.58655	-12.5982	-17.1006	-17.1509	-14.8054	-12.7712	-13.8534	-15.56	-16.5142	-14.2623	-14.3633	-16.9416	-17.076	-17.5227	-13.0753	-15.0635	-12.0566	-12.3117	-12.9241	-14.8251	-15.2061	-16.0612	-14.4342	-14.3691	-13.7876	-16.8371	-16.0208	-13.3198	-12.7824	-15.048	-15.3938	-14.5189	-13.4311	-14.9836	-13.7723	-17.1367	-13.3422	-13.8047	-17.4024	-16.3671	-16.5071	-10.6568	-14.6502	-15.0876	-15.5246	-16.285	-13.6243
531.5	419.5	11.1572	4.58655	-12.1384	-15.5378	-18.6887	-15.5989	-12.7811	-13.5038	-13.532	-19.2735	-15.0749	-17.6958	-16.7834	-17.717	-20.1249	-13.1988	-13.642	-12.3326	-11.0548	-13.4257	-12.8353	-13.8664	-14.9704	-11.9258	-13.0935	-13.4288	-21.119	-15.5725	-14.0483	-11.8432	-13.6837	-14.3728	-15.6297	-14.4755	-15.9142	-14.4125	-18.9203	-12.5918	-14.768	-17.6878	-16.4149	-17.2717	-14.3633	-14.7275	-15.2043	-16.1268	-17.5544	-15.5595
528.5	420.5	11.157	4.58646	-13.8272	-13.3873	-14.7123	-14.8941	-11.1298	-14.344	-14.0732	-13.4858	-19.5865	-16.179	-16.2084	-12.7113	-9.9529	-12.5015	-16.0245	-12.54	-15.2934	-13.4887	-13.1486	-15.4564	-15.6368	-16.1786	-10.352	-17.4183	-15.281	-12.4351	-14.1334	-16.1438	-14.1121	-15.3506	-13.1474	-15.0764	-13.7222	-16.8292	-13.9741	-13.6942	-15.161	-13.807	-13.3635	-18.2415	-10.5443	-16.889	-14.2107	-13.3577	-20.3228	-13.9238
529.5	420.5	11.1571	4.58646	-14.0062	-13.9776	-16.5916	-16.168	-12.0574	-15.9226	-13.8229	-13.4288	-17.0711	-13.8524	-16.4216	-13.8675	-13.5791	-12.9833	-15.0166	-13.0743	-15.8477	-13.8597	-12.5353	-16.264	-14.2288	-18.8113	-12.4757	-15.8381	-14.9022	-15.2374	-14.2435	-15.2793	-17.5048	-15.2176	-14.1505	-15.8229	-15.0978	-15.1533	-14.6462	-13.8659	-14.4673	-13.8129	-14.9355	-17.7073	-10.4165	-16.127	-13.1624	-13.0707	-16.0125	-13.4862
530.5	420.5	11.1571	4.58646	-14.1179	-18.766	-18.9099	-15.4656	-13.6005	-14.1847	-16.5646	-16.0466	-16.4684	-15.0121	-16.0285	-18.0938	-18.6376	-14.7446	-14.6038	-13.2727	-12.4271	-13.4841	-11.9969	-15.766	-12.8943	-16.0367	-13.9452	-14.1233	-17.2463	-18.4791	-13.2124	-14.3129	-15.0113	-13.7784	-16.0138	-15.5948	-19.0345	-14.0401	-18.4902	-13.8947	-13.302	-15.7187	-18.3005	-18.7447	-11.7698	-14.8166	-12.6763	-14.7491	-14.0981	-13.1911
531.5	420.5	11.1572	4.58646	-12.2333	-20.5444	-19.6755	-15.6991	-13.3626	-13.8789	-15.52	-19.3306	-18.9201	-19.7298	-17.2379	-19.315	-20.5816	-14.4685	-15.4887	-12.8336	-10.5262	-13.9946	-11.6713	-16.5249	-12.5584	-12.9358	-12.8713	-13.4411	-18.2337	-18.5071	-13.1945	-13.0072	-13.214	-13.9193	-16.0836	-15.8748	-19.2862	-14.2802	-24.0972	-13.4935	-13.4523	-17.3449	-17.5896	-18.8881	-13.3072	-15.0661	-14.1063	-15.7058	-13.5698	-13.8895
536.5	420.5	11.1577	4.58646	-17.2857	-16.0337	-12.9872	-14.2198	-22.2275	-14.7595	-17.5376	-14.6771	-12.5824	-17.013	-16.4821	-16.4489	-12.1319	-17.3944	-14.6729	-15.9784	-17.058	-15.5624	-12.8384	-14.9762	-14.9761	-10.8755	-13.0021	-15.046	-13.111	-11.5342	-16.2349	-14.1051	-12.1688	-14.5426	-15.8774	-15.3337	-15.9832	-12.1047	-14.0007	-12.2906	-11.5836	-12.7926	-13.9331	-12.8244	-16.5032	-13.6588	-15.0206	-12.6885	-13.9015	-9.45
537.5	420.5	11.1578	4.58645	-15.1261	-16.0687	-12.5776	-16.0528	-19.3539	-15.4896	-18.9021	-13.9882	-12.6525	-16.4245	-16.2085	-14.1681	-10.4499	-16.0924	-14.6985	-17.9487	-13.3326	-11.9621	-15.3201	-15.7562	-16.3149	-12.8186	-14.2842	-15.4265	-13.5177	-13.2631	-15.546	-13.8145	-12.2275	-15.3603	-17.5289	-14.5472	-14.7148	-11.3201	-12.2816	-15.3411	-12.8891	-14.3833	-12.6565	-15.4326	-15.3152	-14.7182	-13.2728	-9.91219	-13.6682	-10.5646
538.5	420.5	11.1579	4.58645	-13.7982	-11.8958	-11.8375	-14.2744	-16.2708	-15.6807	-17.004	-12.7036	-13.9636	-14.6709	-14.0219	-12.778	-11.2191	-16.0743	-14.3479	-16.9447	-12.8463	-12.5618	-16.242	-19.3972	-19.3896	-15.611	-17.5395	-17.5938	-15.1097	-12.5031	-15.0738	-17.042	-14.9591	-15.5684	-15.8113	-14.8377	-13.4524	-13.2311	-13.9655	-19.1352	-12.6923	-13.1035	-10.7389	-15.4964	-15.4156	-15.1795	-11.1438	-9.53552	-14.3719	-11.7082
539.5	420.5	11.1579	4.58645	-14.7317	-9.94273	-11.5136	-13.557	-14.2381	-13.1438	-13.4275	-11.7857	-14.3585	-14.3925	-13.0266	-11.9117	-15.1807	-18.1285	-13.85	-17.2266	-13.128	-14.8281	-18.6193	-17.2088	-19.2038	-15.7867	-18.4477	-19.8435	-15.511	-14.1858	-14.0902	-16.5705	-16.0866	-17.3283	-17.8665	-15.1046	-13.4221	-14.9818	-14.1544	-19.889	-13.9236	-13.4923	-11.7265	-16.6075	-18.4648	-15.0366	-12.1661	-12.673	-14.0303	-12.6212
540.5	420.5	11.158	4.58645	-10.5892	-10.3661	-12.1075	-14.347	-14.5745	-12.0355	-12.9045	-13.819	-14.0493	-14.1899	-13.8111	-12.6223	-19.1097	-12.4385	-15.7749	-18.6879	-12.5442	-16.2712	-22.5996	-16.1075	-17.1297	-17.9813	-17.9178	-18.499	-17.909	-17.163	-17.9546	-15.3322	-15.9785	-17.6439	-19.0545	-15.7785	-15.946	-17.4927	-16.0739	-21.4376	-15.2686	-14.9821	-13.6375	-16.1036	-19.145	-15.9954	-14.3319	-15.7719	-15.3242	-13.4968
528.5	421.5	11.157	4.58637	-14.1893	-13.46	-14.9056	-15.2574	-11.4947	-15.3115	-14.5635	-14.9297	-19.5474	-15.4671	-17.4309	-15.0981	-11.5784	-11.2267	-14.72	-13.3725	-14.0253	-16.3454	-11.0206	-14.3741	-12.7425	-13.5863	-11.3711	-17.1279	-14.2781	-13.1263	-12.4974	-13.1345	-12.9043	-12.5398	-13.4978	-15.158	-13.2612	-18.4396	-15.8317	-12.4512	-14.3207	-12.4166	-12.3246	-15.3692	-11.0238	-14.3493	-11.7822	-15.1848	-19.9205	-17.1607
529.5	421.5	11.157	4.58637	-15.2558	-15.6925	-15.8964	-14.4202	-13.0574	-15.602	-12.9214	-15.4177	-17.5473	-15.703	-15.0617	-15.5323	-16.6749	-12.0062	-13.6157	-14.46	-14.8729	-15.72	-10.4024	-13.662	-11.6757	-15.2623	-14.0307	-16.4675	-13.9872	-16.8381	-12.7509	-11.6074	-15.6522	-11.7041	-14.4134	-15.8684	-14.0596	-14.0546	-15.4216	-13.2109	-16.5485	-13.4507	-15.0674	-16.6774	-9.86728	-16.1268	-10.8794	-14.4235	-17.0952	-14.6655
530.5	421.5	11.1571	4.58637	-14.4767	-15.9165	-17.7642	-15.3849	-14.3507	-13.1722	-13.5545	-18.0542	-16.3063	-16.7755	-13.5789	-17.4736	-20.1445	-12.6722	-14.3784	-14.7016	-13.6832	-15.0982	-10.6937	-14.4422	-11.8758	-15.0591	-14.8595	-13.7435	-15.5822	-20.352	-12.6003	-12.3142	-13.2911	-12.0255	-15.1095	-13.3132	-15.496	-12.673	-15.3222	-15.0737	-14.2341	-15.013	-17.3063	-18.6104	-10.4982	-17.2214	-10.7425	-14.2212	-15.1266	-12.9679
531.5	421.5	11.1572	4.58637	-12.7836	-16.1025	-16.2956	-17.0964	-14.4567	-13.6723	-13.1369	-19.0313	-17.1801	-18.9459	-13.2482	-18.889	-20.0877	-12.4559	-17.8797	-13.4261	-11.6996	-15.0932	-11.9852	-17.542	-12.7578	-13.9591	-13.0327	-12.4254	-14.0089	-17.6235	-13.1348	-14.4295	-12.636	-13.4931	-14.2743	-12.6448	-16.3982	-11.9051	-15.6279	-17.9449	-13.4852	-16.4898	-17.9327	-17.0853	-11.5137	-16.5288	-12.1519	-14.1799	-14.473	-12.9504
536.5	421.5	11.1577	4.58637	-13.5364	-12.9641	-12.8763	-17.9087	-24.7644	-14.409	-15.4018	-13.8254	-16.7276	-16.8604	-16.7266	-14.6538	-13.112	-15.6813	-13.2708	-16.792	-18.5096	-14.682	-16.5649	-17.9363	-13.1709	-12.0194	-14.1484	-15.6361	-12.2291	-13.0746	-16.8792	-15.9101	-15.0639	-15.4726	-15.3483	-15.2575	-15.7695	-11.6055	-14.662	-16.0949	-12.9461	-13.0296	-15.0565	-12.74	-16.8623	-14.6968	-14.3501	-13.4586	-16.2056	-9.64668
537.5	421.5	11.1578	4.58636	-12.7602	-15.5734	-12.428	-16.8107	-19.6898	-15.4743	-16.1557	-12.9741	-15.0764	-16.1153	-14.5497	-13.3535	-11.6918	-13.3331	-13.5233	-17.0619	-14.5029	-12.4855	-17.2138	-17.5848	-14.393	-12.9656	-15.9778	-14.529	-13.26	-13.7411	-16.2712	-14.3733	-14.4377	-17.3692	-15.2209	-15.1837	-15.9489	-11.6087	-12.4785	-18.4318	-12.2508	-15.34	-14.465	-15.8328	-14.4595	-17.4321	-13.94	-10.9624	-16.2134	-10.9087
538.5	421.5	11.1579	4.58636	-13.0069	-13.9402	-12.4799	-13.2462	-17.6929	-17.5408	-16.2071	-11.6482	-16.6972	-14.319	-13.459	-11.9327	-12.3572	-12.7401	-12.6446	-15.7298	-13.8944	-11.8041	-16.5183	-16.9612	-18.1695	-14.8571	-17.0712	-16.2166	-13.7343	-13.616	-15.2864	-14.7161	-15.8548	-16.8566	-16.0991	-14.3024	-17.7408	-13.597	-12.4381	-19.5208	-12.6559	-13.7151	-13.1904	-17.5085	-13.8121	-17.1474	-11.4377	-10.218	-15.2907	-11.9248
539.5	421.5	11.1579	4.58636	-13.0783	-12.1732	-12.7191	-11.8809	-16.0567	-14.803	-14.3973	-11.414	-16.5772	-13.4044	-14.1847	-10.8897	-14.9094	-14.068	-12.8393	-15.9853	-13.5878	-13.6383	-18.119	-14.9546	-21.6651	-13.0047	-17.716	-18.112	-14.5841	-14.7814	-14.3706	-14.3707	-17.692	-18.9037	-16.8061	-15.1485	-17.6079	-14.5331	-13.9851	-18.7102	-14.7479	-13.179	-15.239	-15.4025	-14.2218	-18.2083	-11.3565	-11.4116	-14.3509	-11.9159
540.5	421.5	11.158	4.58636	-11.4147	-11.9763	-13.188	-12.0594	-15.8015	-15.0499	-15.1374	-12.4502	-15.5563	-13.2869	-14.6245	-10.7786	-17.151	-12.2348	-15.8178	-15.783	-11.7516	-16.3548	-18.9458	-13.9488	-19.5659	-13.5568	-16.4467	-16.3749	-17.4195	-16.9685	-16.1621	-15.2509	-17.2852	-16.8058	-19.2686	-16.7562	-16.2867	-14.5701	-15.2288	-18.4408	-18.1532	-16.0494	-17.1654	-13.5298	-15.8054	-19.4628	-13.198	-13.228	-14.5646	-11.739
536.5	422.5	11.1577	4.58628	-11.8153	-11.3985	-14.5122	-16.5645	-22.0273	-13.3666	-13.5248	-14.0465	-20.0038	-13.9461	-15.7919	-12.4504	-11.8709	-15.3924	-11.2735	-15.0015	-18.3428	-14.4543	-14.9039	-18.7095	-13.3776	-13.7466	-14.9139	-16.3385	-12.8825	-14.7822	-14.6467	-17.962	-14.8512	-13.0304	-15.6028	-13.9342	-15.6362	-12.3016	-14.321	-19.601	-12.6952	-16.0754	-16.1476	-11.306	-16.7515	-15.8818	-13.6776	-13.3696	-17.3002	-11.7116
537.5	422.5	11.1578	4.58628	-10.904	-12.6162	-14.1632	-16.1669	-21.4247	-13.6611	-13.7094	-13.0015	-19.2995	-13.3781	-10.9327	-12.7892	-11.532	-14.5666	-13.3342	-14.4673	-15.3302	-13.0832	-16.2443	-16.4432	-14.3943	-14.4252	-15.1376	-14.5469	-12.0136	-13.411	-14.4825	-13.9898	-15.4123	-15.283	-14.8142	-14.1942	-15.5589	-13.0367	-12.8376	-20.0181	-12.0489	-16.636	-15.814	-14.3259	-13.5183	-17.4052	-15.5007	-12.4111	-19.8311	-13.0201
538.5	422.5	11.1579	4.58627	-11.0866	-13.117	-13.0008	-13.9446	-18.7686	-15.3446	-15.4214	-12.8024	-16.1944	-13.1983	-9.5308	-11.042	-12.3236	-12.2756	-12.3234	-14.2125	-15.9111	-11.3368	-15.7838	-16.7862	-18.1395	-14.3104	-13.5983	-15.7465	-12.0866	-12.9067	-15.6434	-12.6981	-16.7086	-17.9673	-17.0532	-14.4166	-19.0855	-14.733	-13.4441	-19.8128	-13.4583	-13.0785	-16.3575	-17.3853	-12.6672	-15.5839	-15.5984	-11.8807	-18.1295	-13.2291
539.5	422.5	11.1579	4.58627	-12.1976	-13.2153	-11.9168	-12.0416	-16.5471	-16.137	-16.88	-12.2036	-14.6091	-13.2841	-11.1572	-9.83236	-15.1727	-12.2874	-11.423	-16.4303	-16.699	-12.4395	-16.6256	-14.321	-20.3066	-12.9025	-14.0163	-15.7914	-13.3831	-14.5427	-14.5207	-12.4011	-19.7213	-18.7066	-17.2729	-14.6682	-21.1458	-12.6837	-14.959	-19.7117	-16.8424	-13.2948	-18.5627	-16.7338	-12.0825	-17.6167	-14.0867	-13.3631	-16.5567	-13.4995
540.5	422.5	11.158	4.58627	-12.7056	-13.3454	-11.4688	-11.5341	-15.2536	-15.2869	-16.0738	-12.1687	-14.5931	-13.999	-11.6957	-9.18591	-15.6377	-13.0243	-12.5296	-16.3441	-13.5381	-14.4716	-17.5295	-13.3653	-17.4675	-12.5903	-14.932	-14.617	-15.0279	-17.2676	-14.4772	-12.7935	-21.8069	-13.4495	-19.479	-16.3427	-15.681	-12.1202	-13.6344	-18.5623	-20.1108	-17.2247	-16.7606	-14.7381	-12.9485	-17.8173	-14.5039	-15.0928	-16.8897	-14.0456
536.5	423.5	11.1577	4.58619	-13.8511	-12.6785	-15.0788	-15.4489	-16.8505	-12.6734	-13.8153	-14.4557	-16.9075	-13.7287	-16.642	-12.7732	-10.8308	-15.2642	-12.7734	-13.4888	-16.0625	-13.7736	-11.2443	-16.9762	-15.1317	-15.1728	-14.5884	-16.6529	-16.6327	-15.2556	-13.4008	-15.2246	-14.4109	-11.3874	-16.8753	-13.9278	-14.313	-15.1648	-13.3661	-15.6032	-11.3866	-16.5786	-15.6736	-11.8146	-12.2095	-15.4217	-14.5517	-12.6851	-15.0656	-14.7165
537.5	423.5	11.1578	4.58619	-11.8555	-12.271	-16.0715	-16.1022	-16.2861	-11.691	-12.8943	-13.2776	-17.2646	-12.3425	-11.7464	-16.2873	-10.6582	-18.6586	-15.7634	-12.3274	-13.5797	-13.7734	-12.9219	-12.6472	-15.8872	-15.3905	-13.3005	-12.6341	-13.8935	-13.4689	-12.9513	-12.8216	-15.0835	-14.4347	-16.8918	-13.8227	-13.676	-16.2579	-12.8642	-16.9415	-11.2189	-14.6944	-16.7128	-15.4037	-12.3812	-15.2957	-17.9695	-12.8243	-15.7194	-15.0607
538.5	423.5	11.1579	4.58618	-11.1552	-11.8191	-14.6269	-15.4609	-16.2203	-13.1309	-14.427	-14.2385	-13.0876	-12.0736	-10.0429	-12.1374	-11.7519	-13.4356	-12.6689	-12.4437	-14.8709	-11.8137	-15.2918	-12.0956	-19.0639	-14.2991	-12.7528	-13.4059	-13.3851	-13.0011	-14.0062	-12.3529	-15.9	-16.5347	-16.1984	-15.9059	-16.773	-14.7043	-14.9254	-17.2012	-13.3392	-12.4186	-19.7036	-16.4031	-12.7498	-15.0999	-22.5108	-13.4998	-18.8739	-14.5895
539.5	423.5	11.1579	4.58618	-11.8649	-12.3524	-12.5113	-12.1325	-15.2266	-14.6806	-17.5352	-13.5249	-11.1679	-12.8799	-10.3074	-10.2972	-12.8445	-12.9142	-10.9751	-14.8238	-16.62	-12.4518	-16.3313	-13.3381	-18.2249	-14.5139	-14.374	-13.398	-15.7399	-14.8527	-12.3683	-12.5778	-16.4378	-14.22	-17.0263	-16.4709	-17.9803	-12.4391	-15.6677	-18.263	-17.2986	-14.0773	-16.7572	-15.2748	-12.4474	-18.4492	-21.7478	-15.8095	-16.7216	-15.5639
540.5	423.5	11.158	4.58618	-12.827	-12.9833	-11.6895	-10.3755	-13.7881	-13.7934	-16.0353	-12.3271	-12.274	-13.0359	-11.4004	-9.63308	-13.0723	-15.8326	-11.361	-17.2465	-15.4418	-13.7547	-16.5944	-14.2609	-14.752	-14.6691	-15.8994	-13.6121	-15.3379	-17.8091	-12.1324	-11.7707	-18.8697	-12.0118	-19.187	-17.5407	-14.5182	-14.445	-12.3699	-18.9186	-18.817	-18.5372	-14.9541	-17.0208	-12.8952	-16.791	-18.0636	-16.2369	-18.6461	-17.3305
511.5	424.5	11.1554	4.58612	-13.9765	-10.8332	-10.4997	-13.8132	-14.9007	-10.0745	-9.5589	-13.4238	-12.2495	-12.6759	-9.96981	-15.1015	-11.9718	-15.1876	-14.3403	-17.6908	-16.3213	-16.4512	-14.796	-14.3916	-12.6869	-19.1839	-15.0641	-18.1116	-15.2726	-13.6975	-12.9427	-15.9086	-16.7554	-12.245	-13.9955	-12.4627	-12.2072	-17.5603	-11.9699	-16.9218	-12.2254	-15.1808	-15.6811	-11.626	-13.0068	-16.3501	-13.7488	-12.026	-10.4594	-11.1462
536.5	424.5	11.1577	4.5861	-14.6283	-13.607	-14.3869	-14.8152	-15.7459	-14.3683	-14.6692	-15.3736	-14.5642	-13.3646	-18.1692	-12.1362	-12.3177	-14.9564	-16.7221	-14.9119	-13.1894	-13.0183	-12.2118	-16.0896	-18.7682	-19.3199	-14.7846	-16.8446	-17.4869	-15.0885	-12.8498	-14.5206	-15.6433	-12.2781	-16.2345	-15.84	-11.6904	-18.4033	-13.9407	-14.6101	-11.9008	-16.0232	-16.8517	-16.2965	-11.3402	-14.5816	-14.9935	-14.0851	-13.6848	-11.9091
537.5	424.5	11.1578	4.5861	-14.0743	-12.937	-14.9863	-15.0038	-14.5926	-13.6864	-13.6871	-15.0649	-16.5547	-13.2502	-14.9972	-15.4909	-12.1621	-17.0972	-17.1575	-12.4421	-12.2604	-14.7043	-13.9803	-11.5384	-19.6216	-15.4153	-13.1505	-11.1222	-16.1271	-13.9314	-12.241	-13.2491	-17.3199	-15.0341	-16.1921	-14.5156	-11.6765	-18.1977	-13.5629	-15.2893	-10.9224	-15.2382	-19.0568	-16.5227	-12.3896	-14.5156	-17.8242	-14.832	-13.4773	-13.0343
538.5	424.5	11.1578	4.58609	-12.7133	-12.7013	-15.047	-14.613	-13.8624	-13.1839	-14.1075	-15.9445	-11.8013	-13.3378	-12.4395	-15.5917	-12.5414	-13.3773	-12.655	-12.179	-13.6081	-13.5283	-17.4898	-9.93575	-19.7358	-14.4428	-12.9108	-12.9538	-16.8181	-13.9972	-13.2492	-13.4966	-17.4319	-14.526	-16.2186	-15.4734	-14.4707	-14.3767	-15.1321	-15.5179	-12.2792	-13.548	-21.0268	-14.3142	-14.032	-16.9388	-19.7051	-16.2679	-15.419	-14.747
539.5	424.5	11.1579	4.58609	-12.6282	-13.1345	-13.6476	-12.1485	-14.5126	-13.7302	-14.4992	-15.1142	-9.71811	-13.3399	-12.4444	-12.5832	-13.4535	-12.5504	-11.4106	-13.156	-14.925	-13.8856	-17.631	-11.9003	-17.6333	-16.8902	-17.3146	-13.7031	-18.7689	-16.3432	-12.3622	-14.6739	-15.3704	-12.5948	-18.135	-18.7758	-15.8483	-13.8583	-16.1643	-16.3757	-16.2654	-15.1403	-17.9427	-12.4161	-13.8636	-21.1066	-21.6376	-17.4115	-15.294	-16.0684
540.5	424.5	11.158	4.58609	-13.1495	-13.6151	-13.1647	-11.0878	-14.2298	-13.6247	-13.3991	-12.5786	-9.77566	-11.9933	-13.676	-10.964	-12.8268	-14.9845	-12.3057	-13.7695	-14.606	-15.2926	-15.3967	-13.8159	-14.5657	-17.7473	-17.6768	-12.974	-16.7067	-17.7401	-11.4775	-13.7779	-15.7972	-12.8782	-18.0933	-21.1791	-13.6721	-16.2244	-12.5544	-17.0913	-17.4027	-15.8922	-15.6572	-14.7615	-14.0086	-17.4948	-21.4333	-14.611	-16.8	-16.0941
507.5	425.5	11.1551	4.58604	-12.2771	-11.1774	-13.3935	-16.5578	-11.4595	-16.7953	-14.4772	-11.7991	-9.75052	-10.9567	-12.7482	-14.5429	-11.8625	-14.3194	-14.976	-11.8478	-14.0201	-12.501	-16.5854	-15.8356	-16.0624	-15.8961	-12.9288	-17.4487	-18.0088	-13.8822	-14.0768	-14.5236	-14.5552	-18.2096	-12.0352	-10.3702	-15.5147	-13.7136	-13.4815	-14.911	-12.5224	-13.3355	-16.7246	-13.8335	-17.4044	-17.9127	-14.1843	-16.3486	-13.7808	-19.1663
508.5	425.5	11.1552	4.58604	-11.4371	-10.3785	-12.3356	-17.7391	-13.4977	-17.7689	-14.6461	-10.4669	-9.52994	-9.57175	-11.924	-14.0885	-10.6002	-15.0923	-17.8498	-12.4189	-14.9555	-12.7457	-15.6457	-14.7514	-17.3212	-12.3385	-13.0061	-20.8864	-19.9176	-14.6432	-17.3186	-15.2763	-12.2061	-15.2645	-12.4638	-11.6784	-15.6455	-17.3336	-11.398	-14.9222	-10.2683	-12.3436	-17.7504	-11.7339	-14.0491	-16.9395	-14.4924	-17.4265	-12.1304	-17.6432
509.5	425.5	11.1553	4.58604	-11.6801	-9.96564	-10.9359	-16.984	-15.1895	-20.7192	-12.3073	-10.3582	-9.58491	-8.78198	-10.0996	-13.9406	-10.1971	-15.8379	-18.6424	-14.839	-14.5481	-15.3175	-13.969	-14.0867	-15.0989	-11.2882	-12.2152	-17.4947	-17.6505	-14.3936	-19.8199	-16.6194	-11.0745	-13.2577	-13.2276	-13.7806	-14.0424	-15.2299	-12.4332	-15.4438	-9.38483	-10.9265	-14.0261	-10.4357	-12.5963	-17.7621	-17.6149	-14.6695	-12.2271	-15.0304
510.5	425.5	11.1553	4.58603	-11.3849	-10.3878	-10.0734	-14.9017	-14.7087	-13.6606	-10.4347	-11.94	-10.8437	-8.69647	-9.2148	-13.9026	-10.6515	-16.3389	-16.9486	-16.5174	-13.1511	-18.4287	-14.6758	-14.5077	-14.3697	-13.9069	-13.2457	-14.4041	-16.2782	-13.9246	-14.7284	-15.22	-10.8414	-13.3679	-13.8647	-11.9268	-12.6083	-16.6544	-14.7482	-17.1328	-9.54259	-12.4645	-12.4673	-9.37671	-10.7852	-18.3161	-10.5403	-13.5849	-12.7623	-14.5601
511.5	425.5	11.1554	4.58603	-11.0082	-11.6182	-10.7329	-12.9581	-13.3953	-11.2134	-10.1972	-13.4944	-12.5026	-10.8289	-10.3899	-12.4249	-11.1242	-15.187	-16.0175	-18.2432	-14.3132	-15.1409	-15.9431	-14.4542	-14.7074	-15.4939	-14.9434	-16.1374	-15.9455	-14.1234	-12.69	-16.2225	-16.3023	-11.0864	-14.5033	-13.2279	-11.6656	-17.2851	-11.9365	-15.6849	-11.121	-15.7356	-12.353	-10.2388	-12.4595	-15.0635	-12.6663	-12.0003	-12.5538	-12.4398
508.5	426.5	11.1552	4.58595	-12.2618	-10.7546	-11.866	-16.4787	-14.7893	-19.9327	-16.2883	-12.0673	-11.472	-10.0845	-13.3731	-13.7643	-11.7499	-14.7584	-18.1718	-18.4506	-11.4325	-14.7764	-15.4333	-16.4144	-15.4769	-12.8929	-12.927	-20.6179	-21.7481	-14.3795	-17.4042	-13.4597	-14.483	-14.6402	-12.5997	-12.4923	-15.2826	-15.9974	-13.6057	-13.2531	-9.67323	-14.4974	-15.38	-10.328	-17.6858	-18.9795	-13.8959	-13.788	-13.2045	-10.3446
509.5	426.5	11.1553	4.58595	-11.5568	-10.062	-11.0498	-16.0436	-14.5901	-17.9498	-12.9714	-12.4052	-10.9404	-9.15839	-12.3525	-13.3193	-11.1257	-14.0621	-18.0171	-17.0171	-12.0116	-16.5724	-13.1086	-14.9151	-13.7985	-11.2003	-13.0633	-16.3433	-16.4502	-15.9002	-16.3534	-15.8353	-10.367	-14.8265	-13.4565	-13.6081	-13.2617	-16.206	-13.7154	-13.0404	-9.24836	-12.897	-12.2377	-8.93325	-15.8799	-18.8485	-14.8187	-13.1739	-13.7615	-10.9324
510.5	426.5	11.1553	4.58594	-11.0366	-10.5105	-10.8973	-13.9465	-13.4293	-14.3495	-11.2661	-14.0807	-11.4965	-8.75809	-11.6779	-12.219	-10.9821	-15.0593	-19.1636	-17.4623	-14.3009	-17.8725	-14.9362	-15.3712	-14.9908	-12.8619	-14.7788	-14.377	-14.5812	-16.2339	-12.6075	-15.2836	-10.2542	-15	-13.4046	-11.623	-12.4097	-16.9552	-14.4479	-14.8876	-9.69465	-13.1188	-11.4421	-8.02653	-11.2761	-18.2201	-12.1557	-14.7155	-15.5021	-14.307
511.5	426.5	11.1554	4.58594	-10.525	-11.4707	-11.2565	-13.0413	-12.8344	-12.7025	-11.3453	-15.4117	-12.3074	-10.7984	-11.7224	-11.3039	-11.116	-14.228	-18.278	-18.3581	-15.4841	-16.568	-18.5259	-16.333	-16.9878	-14.6463	-14.3397	-17.6056	-12.4803	-15.0932	-12.1939	-16.0565	-14.3625	-10.7372	-15.899	-15.4388	-11.7788	-15.322	-13.1056	-13.5761	-11.2891	-14.7287	-12.6011	-9.63953	-12.4423	-15.7548	-15.1282	-14.0925	-15.8769	-14.7088
508.5	427.5	11.1552	4.58586	-13.7276	-11.7937	-11.5935	-15.1462	-16.035	-18.6537	-14.6161	-15.04	-13.6302	-11.3758	-13.6937	-13.2606	-13.7565	-13.3308	-11.8166	-16.5729	-9.82499	-16.5483	-14.3387	-13.8114	-15.4628	-13.7273	-13.6999	-18.6572	-13.2334	-14.6872	-14.6807	-12.9684	-13.3291	-12.5035	-12.8179	-12.4448	-13.9924	-17.866	-14.4619	-13.4047	-10.3023	-15.8162	-13.2873	-12.2974	-18.3285	-20.3881	-14.2525	-10.5347	-14.5163	-10.909
509.5	427.5	11.1553	4.58586	-13.4811	-12.261	-11.5186	-15.5738	-16.3633	-14.3732	-11.7425	-13.437	-11.6338	-10.5382	-13.103	-13.3766	-13.2233	-13.4717	-15.3242	-16.2793	-11.1871	-16.4796	-12.7705	-15.3414	-13.8257	-12.8023	-14.084	-15.4908	-12.8013	-15.9154	-12.1063	-15.0063	-12.0973	-14.2378	-14.5092	-13.4385	-12.3168	-18.4653	-14.1908	-12.7315	-10.0905	-15.9773	-11.6028	-10.2574	-17.7517	-18.364	-13.4464	-10.9377	-15.5229	-9.24716
510.5	427.5	11.1553	4.58586	-12.4375	-11.8177	-11.3734	-14.1122	-14.905	-12.3801	-11.1592	-13.7376	-10.9745	-10.499	-12.0081	-11.9321	-13.4601	-14.6504	-19.137	-18.8628	-16.1469	-17.3208	-15.3743	-17.8304	-13.7386	-13.8003	-16.0792	-14.3606	-14.3407	-17.233	-10.6065	-14.4461	-12.3145	-15.4972	-15.4307	-12.7936	-11.9624	-17.0557	-13.5155	-14.8415	-11.6742	-14.4128	-11.9234	-9.34169	-13.8711	-17.5896	-15.7252	-13.5845	-14.8256	-12.3089
511.5	427.5	11.1554	4.58585	-11.6269	-11.6237	-10.8967	-13.9142	-13.4315	-11.4088	-11.0102	-15.4157	-10.7179	-12.3918	-11.2545	-11.3407	-14.2846	-14.7894	-15.5007	-19.5874	-17.8878	-19.2827	-19.2599	-20.8607	-16.98	-16.0651	-13.5766	-15.935	-12.4833	-15.7727	-11.9008	-16.221	-13.8202	-12.3811	-16.6114	-18.1607	-12.1865	-15.2141	-13.3328	-14.841	-13.1476	-14.7636	-15.506	-11.1132	-13.4587	-17.2626	-20.5138	-17.3909	-13.748	-15.2681
508.5	428.5	11.1552	4.58577	-12.3341	-11.9505	-12.0782	-15.7466	-15.0242	-16.1052	-12.5507	-14.0853	-14.1617	-11.8275	-10.8412	-14.8468	-15.7131	-13.5838	-9.17232	-16.2723	-9.30713	-14.5894	-14.4796	-12.6772	-14.9455	-16.5115	-12.978	-17.7775	-10.8352	-14.3829	-13.7576	-13.8056	-10.9461	-12.0704	-13.4276	-11.5876	-13.2473	-17.4024	-14.577	-14.0998	-11.4552	-14.4609	-13.5568	-12.6097	-16.4966	-18.2216	-12.6724	-9.79391	-14.0766	-12.1115
509.5	428.5	11.1553	4.58577	-12.7581	-14.2823	-12.6331	-16.6332	-14.2939	-12.3737	-11.0893	-11.5718	-11.0706	-11.4041	-10.3226	-14.5381	-15.7557	-12.3906	-14.9674	-16.9002	-11.692	-15.5371	-13.4002	-16.5343	-13.9631	-15.8933	-13.0389	-14.71	-11.7968	-15.0166	-11.0926	-12.7928	-11.2976	-13.6182	-14.4408	-13.192	-12.4848	-17.1523	-14.0682	-14.21	-10.8554	-16.3397	-12.6882	-12.7772	-17.2797	-18.3726	-12.4597	-10.4659	-13.3305	-10.3171
[truncated: 497 more rows]
[truncated: 7 more columns]

## Sheet: Buildup
Pixel-X	Pixel-Y	Longitude	Latitude	Sigma0_VH_db_mst_07Apr2015	Sigma0_VH_db_slv1_25May2015	Sigma0_VH_db_slv3_06Jun2015	Sigma0_VH_db_slv5_18Jun2015	Sigma0_VH_db_slv7_12Jul2015	Sigma0_VH_db_slv9_24Jul2015	Sigma0_VH_db_slv15_05Aug2015	Sigma0_VH_db_slv17_17Aug2015	Sigma0_VH_db_slv19_10Sep2015	Sigma0_VH_db_slv21_22Sep2015	Sigma0_VH_db_slv23_04Oct2015	Sigma0_VH_db_slv25_16Oct2015	Sigma0_VH_db_slv27_28Oct2015	Sigma0_VH_db_slv29_21Nov2015	Sigma0_VH_db_slv31_03Dec2015	Sigma0_VH_db_slv33_15Dec2015	Sigma0_VH_db_slv35_08Jan2016	Sigma0_VH_db_slv37_20Jan2016	Sigma0_VH_db_slv39_13Feb2016	Sigma0_VH_db_slv41_08Mar2016	Sigma0_VH_db_slv43_20Mar2016	Sigma0_VH_db_slv45_01Apr2016	Sigma0_VH_db_slv47_13Apr2016	Sigma0_VH_db_slv49_07May2016	Sigma0_VH_db_slv53_19May2016	Sigma0_VH_db_slv55_31May2016	Sigma0_VH_db_slv57_12Jun2016	Sigma0_VH_db_slv59_06Jul2016	Sigma0_VH_db_slv61_18Jul2016	Sigma0_VH_db_slv63_30Jul2016	Sigma0_VH_db_slv65_11Aug2016	Sigma0_VH_db_slv67_23Aug2016	Sigma0_VH_db_slv69_04Sep2016	Sigma0_VH_db_slv71_16Sep2016	Sigma0_VH_db_slv73_28Sep2016	Sigma0_VH_db_slv75_10Oct2016	Sigma0_VH_db_slv77_22Oct2016	Sigma0_VH_db_slv79_03Nov2016	Sigma0_VH_db_slv81_15Nov2016	Sigma0_VH_db_slv83_27Nov2016	Sigma0_VH_db_slv85_21Dec2016	Sigma0_VH_db_slv87_02Jan2017	Sigma0_VH_db_slv89_14Jan2017	Sigma0_VH_db_slv91_26Jan2017	Sigma0_VH_db_slv93_07Feb2017	Sigma0_VH_db_slv95_19Feb2017
[truncated: 610 more rows]
[truncated: 7 more columns]

[truncated: 3 more sheets: Earthroad, SForest, Farmland]
