# Supplementary material for: Delineation of Cocoa Agroforests Using Multi-Season Sentinel-1 SAR Images: Low Grey Level Range Reduces Uncertainties in GLCM Texture-Based Mapping
Source: Preprints.org preprint supplement (doi:10.20944/preprints201901.0050.v1), 2019-01-07
Supplement: Supplementary file 2 [file VV_TemporalProfile_For_LULC.xlsx]

## Sheet: Water_VV
Pixel-X	Pixel-Y	Longitude	Latitude	Sigma0_VV_db_mst_07Apr2015	Sigma0_VV_db_slv2_25May2015	Sigma0_VV_db_slv4_06Jun2015	Sigma0_VV_db_slv6_18Jun2015	Sigma0_VV_db_slv8_12Jul2015	Sigma0_VV_db_slv10_24Jul2015	Sigma0_VV_db_slv16_05Aug2015	Sigma0_VV_db_slv18_17Aug2015	Sigma0_VV_db_slv20_10Sep2015	Sigma0_VV_db_slv22_22Sep2015	Sigma0_VV_db_slv24_04Oct2015	Sigma0_VV_db_slv26_16Oct2015	Sigma0_VV_db_slv28_28Oct2015	Sigma0_VV_db_slv30_21Nov2015	Sigma0_VV_db_slv32_03Dec2015	Sigma0_VV_db_slv34_15Dec2015	Sigma0_VV_db_slv36_08Jan2016	Sigma0_VV_db_slv38_20Jan2016	Sigma0_VV_db_slv40_13Feb2016	Sigma0_VV_db_slv42_08Mar2016	Sigma0_VV_db_slv44_20Mar2016	Sigma0_VV_db_slv46_01Apr2016	Sigma0_VV_db_slv48_13Apr2016	Sigma0_VV_db_slv50_07May2016	Sigma0_VV_db_slv54_19May2016	Sigma0_VV_db_slv56_31May2016	Sigma0_VV_db_slv58_12Jun2016	Sigma0_VV_db_slv60_06Jul2016	Sigma0_VV_db_slv62_18Jul2016	Sigma0_VV_db_slv64_30Jul2016	Sigma0_VV_db_slv66_11Aug2016	Sigma0_VV_db_slv68_23Aug2016	Sigma0_VV_db_slv70_04Sep2016	Sigma0_VV_db_slv72_16Sep2016	Sigma0_VV_db_slv74_28Sep2016	Sigma0_VV_db_slv76_10Oct2016	Sigma0_VV_db_slv78_22Oct2016	Sigma0_VV_db_slv80_03Nov2016	Sigma0_VV_db_slv82_15Nov2016	Sigma0_VV_db_slv84_27Nov2016	Sigma0_VV_db_slv86_21Dec2016	Sigma0_VV_db_slv88_02Jan2017	Sigma0_VV_db_slv90_14Jan2017	Sigma0_VV_db_slv92_26Jan2017	Sigma0_VV_db_slv94_07Feb2017	Sigma0_VV_db_slv96_19Feb2017
193.5	586.5	11.1269	4.57194	-13.6933	-6.31238	-6.36502	-2.91857	-10.409	-13.0686	-10.4404	-6.04558	-5.79715	-4.47859	-1.91791	-6.54212	-4.49879	-11.0213	-12.3031	-9.51183	-13.167	-7.48446	-13.1973	-6.63363	-13.4177	-11.0057	-11.7012	-9.56582	-8.52395	-9.31195	-10.8371	-14.2665	-15.0641	-7.57952	-10.9628	-10.9813	-12.9325	-12.6208	-13.568	-15.4589	-17.5838	-9.20375	-12.7434	-12.227	-14.4533	-13.617	-9.52544	-11.1966	-17.7077	-12.0157
193.5	587.5	11.1269	4.57185	-15.4393	-5.64157	-8.38811	-4.15063	-15.079	-16.1767	-14.9441	-6.03195	-4.39587	-5.97827	-4.06396	-3.90877	-5.81714	-14.4264	-11.9493	-13.0738	-14.6671	-10.4884	-10.8925	-8.20012	-10.2909	-14.0022	-10.7596	-9.94985	-7.40387	-9.27314	-7.83357	-11.059	-11.0107	-5.5824	-9.71102	-8.032	-12.2987	-10.6073	-15.0851	-13.2071	-12.9223	-6.53044	-10.3219	-10.7525	-11.3199	-12.5448	-8.57933	-9.15744	-15.3165	-11.8622
192.5	588.5	11.1268	4.57176	-14.301	-8.61894	-9.16055	-7.51295	-16.607	-20.0168	-15.8493	-9.46988	-5.24282	-9.03484	-3.82482	-4.14576	-9.33614	-17.2257	-10.6759	-11.257	-10.6387	-9.13476	-7.22331	-6.97105	-8.19161	-10.9465	-10.0015	-6.04268	-7.06851	-10.871	-5.2369	-8.69224	-5.54458	-4.31075	-7.29091	-7.55563	-7.66642	-11.202	-10.3902	-9.59821	-13.2905	-7.71804	-8.8452	-11.6228	-11.4977	-12.3142	-8.89292	-7.88044	-12.4926	-14.9706
192.5	589.5	11.1268	4.57167	-8.95386	-6.94707	-8.74218	-8.57751	-14.6064	-16.5159	-12.8883	-12.4349	-6.45911	-6.36358	-3.50092	-4.98475	-7.96173	-15.3281	-9.48342	-10.3571	-14.1003	-9.48679	-9.36358	-6.73375	-10.7972	-12.2116	-9.43913	-5.93522	-9.82554	-7.48409	-5.18564	-10.2234	-8.00079	-5.52327	-8.44348	-10.5575	-8.61698	-11.5073	-8.21671	-7.64784	-11.9901	-5.70362	-7.51922	-8.88794	-9.8803	-10.3698	-9.50915	-7.55011	-11.5017	-10.7822
192.5	590.5	11.1268	4.57158	-8.73556	-5.22387	-8.92692	-7.99848	-13.9628	-14.2862	-14.0103	-11.1343	-7.80297	-5.60318	-3.44287	-6.26069	-6.50491	-15.0095	-8.70534	-10.6767	-14.7171	-7.73223	-11.4944	-8.41703	-12.2172	-11.7944	-10.3603	-8.32109	-8.55867	-6.01021	-5.63999	-11.2483	-10.235	-6.44008	-10.3462	-11.6739	-10.6474	-13.5408	-9.03039	-8.46139	-10.7151	-6.48952	-6.10963	-9.329	-9.71032	-9.5651	-11.322	-9.38051	-9.55899	-5.49668
192.5	591.5	11.1268	4.57149	-12.6317	-5.9964	-8.74128	-7.21628	-15.4268	-12.6292	-17.0466	-9.21707	-7.2471	-6.82103	-4.95548	-7.86322	-8.18988	-15.3837	-8.36026	-11.6051	-11.3993	-5.49079	-11.6463	-11.5143	-11.9446	-12.5	-12.468	-12.6065	-5.65587	-5.46196	-4.98801	-8.38495	-9.50746	-5.4991	-10.2721	-11.4659	-8.79604	-15.6306	-11.335	-13.4036	-9.7524	-9.1587	-5.09284	-10.152	-9.79439	-9.59898	-12.1474	-11.2008	-8.96564	-4.85156
192.5	592.5	11.1268	4.5714	-15.0918	-8.57216	-9.63903	-8.32741	-17.4696	-10.3339	-14.4237	-10.1918	-7.25777	-8.72697	-7.66094	-11.7377	-12.0323	-12.3791	-9.07643	-11.4182	-10.6733	-5.77468	-11.6249	-11.5883	-10.1466	-11.3178	-11.6241	-13.9723	-5.08141	-5.67913	-5.53672	-6.27129	-9.61521	-4.08728	-9.05088	-12.4452	-9.78422	-17.4656	-12.0189	-11.5006	-9.67427	-8.72216	-5.82428	-11.2713	-10.8849	-9.98043	-11.1014	-10.3092	-8.30226	-7.08327
220.5	654.5	11.1292	4.56582	-11.5987	-5.00772	-9.50281	-6.00973	-9.33193	-10.5201	-9.68911	-4.18728	-5.64526	-5.0093	-3.24672	-3.90414	-4.73215	-7.651	-5.09167	-4.36071	-6.82529	-4.72956	-4.95659	-8.91975	-7.59254	-7.80767	-6.30125	-4.82611	-4.76417	-7.90796	-10.8279	-9.25986	-11.2043	-8.79833	-8.11055	-8.1566	-8.31966	-8.10971	-8.95977	-6.41201	-4.09164	-6.37331	-7.006	-5.42329	-6.84735	-7.95156	-5.48301	-8.71965	-8.69713	-10.8427
221.5	655.5	11.1293	4.56573	-9.66434	-6.45624	-7.30106	-4.88882	-10.0356	-7.54485	-10.1831	-6.98909	-6.19018	-7.45138	-5.65743	-3.7951	-7.70541	-12.0629	-3.8634	-4.50161	-7.66859	-6.60737	-4.04523	-8.24221	-6.36101	-6.96063	-6.76729	-5.04808	-3.11155	-10.4641	-9.57723	-7.35923	-11.5546	-6.24811	-6.17169	-10.3008	-7.22108	-6.61469	-7.17133	-3.1472	-2.70082	-5.50543	-7.18434	-5.69352	-8.09891	-8.30936	-6.29395	-6.45802	-14.2854	-9.48662
222.5	656.5	11.1294	4.56564	-8.81924	-10.9844	-7.23294	-3.34482	-7.71644	-7.27174	-8.47767	-6.41481	-8.15633	-6.2981	-9.03461	-6.0493	-9.21678	-13.0948	-7.05549	-5.1376	-7.79437	-5.44352	-5.04211	-10.38	-2.93691	-5.69289	-8.8886	-4.01287	-3.2793	-5.54903	-6.3223	-6.15473	-10.592	-7.51882	-3.87739	-8.0022	-3.91578	-10.5729	-5.70401	-5.6948	-2.74122	-3.63426	-7.3667	-7.07523	-8.19357	-10.0497	-3.9627	-6.79678	-14.1915	-9.79889
223.5	657.5	11.1295	4.56555	-7.94442	-10.1419	-10.9968	-2.69156	-6.99958	-9.88082	-6.75232	-10.8351	-7.42425	-6.31539	-8.08149	-6.9557	-7.25917	-11.644	-10.4913	-6.96061	-7.47359	-6.66342	-9.74926	-13.7408	-5.96093	-8.30522	-8.10422	-5.32812	-3.44308	-3.69462	-6.95922	-9.44321	-8.34152	-9.03382	-3.19498	-5.26497	-5.2116	-9.91029	-3.29653	-8.36699	-4.90149	-4.86662	-4.43342	-7.35475	-9.32556	-6.98976	-4.42154	-7.52304	-11.1475	-9.56786
224.5	658.5	11.1296	4.56546	-8.82547	-7.71289	-10.5547	-3.95825	-7.08268	-10.4544	-8.35337	-8.06026	-8.58493	-6.06101	-7.06138	-4.64895	-8.24545	-15.0837	-10.0267	-5.93233	-7.60252	-9.00545	-8.68691	-12.7086	-11.9083	-8.55602	-8.22704	-8.93424	-4.99609	-5.11201	-6.73803	-11.238	-6.69551	-6.70277	-3.69226	-4.5847	-5.11559	-4.42488	-5.25054	-5.48567	-3.52983	-6.1671	-4.7154	-8.49699	-10.9854	-6.50696	-8.24301	-5.62637	-10.5678	-11.3995
257.5	740.5	11.1325	4.55808	-8.64778	-7.02841	-7.3792	-5.63122	-11.7739	-12.4455	-7.6807	-6.69993	-4.7317	-5.08878	-3.45859	-7.58256	-9.60608	-8.87502	-8.14814	-9.23018	-9.481	-7.16988	-9.79691	-13.3095	-10.4197	-12.4877	-11.4513	-10.1603	-8.91637	-8.766	-8.99962	-11.8148	-7.86184	-9.23062	-10.4228	-10.7722	-7.72613	-8.45753	-8.18197	-8.07216	-8.86389	-8.27995	-4.95615	-10.2016	-9.17217	-6.39203	-12.3201	-6.18998	-11.6199	-10.6212
258.5	742.5	11.1325	4.5579	-7.68391	-6.28912	-6.89348	-4.9769	-10.1585	-8.26514	-11.5864	-10.3527	-5.99218	-6.66847	-7.23904	-2.75055	-8.64787	-8.5249	-6.95208	-9.91699	-5.47949	-10.1208	-7.93655	-11.0767	-10.0199	-9.19079	-8.65571	-7.54509	-12.4122	-12.1966	-7.27567	-5.24889	-14.9048	-11.8908	-11.6628	-13.6066	-10.643	-6.8458	-9.39095	-7.6419	-13.3599	-10.2383	-10.2712	-14.8414	-9.8779	-5.68617	-11.3444	-10.9992	-9.02406	-9.58566
259.5	744.5	11.1326	4.55772	-10.8149	-7.77528	-5.77503	-3.76183	-11.0319	-9.58	-10.0779	-7.47754	-10.9318	-7.96391	-5.97992	-2.27658	-10.0766	-11.172	-5.80642	-8.97124	-7.23862	-9.42121	-7.77066	-9.21913	-5.74417	-9.27751	-9.18513	-9.72859	-8.10754	-10.6547	-5.6317	-6.68402	-11.82	-6.92008	-14.4634	-10.8429	-9.41472	-5.04267	-7.44733	-8.96664	-9.00465	-12.3258	-12.6173	-14.052	-11.2501	-8.51636	-8.80496	-8.6318	-7.02461	-8.88561
259.5	745.5	11.1326	4.55763	-10.7974	-8.11994	-7.38151	-3.42414	-12.225	-8.46426	-11.2033	-8.2037	-9.87634	-6.70469	-4.52316	-4.60361	-9.46792	-11.1901	-8.68253	-6.65422	-6.75751	-11.3606	-8.33953	-6.95748	-5.21387	-9.69026	-11.2758	-11.103	-7.54847	-12.0873	-5.04125	-8.55483	-13.075	-6.31362	-8.95724	-9.99883	-5.71502	-4.98394	-7.7803	-8.06897	-8.10707	-12.3575	-12.83	-12.4267	-10.1874	-7.94541	-8.02893	-9.80368	-7.92031	-9.66902
266.5	748.5	11.1332	4.55736	-13.5607	-10.3561	-4.62919	-7.20193	-10.4026	-9.09731	-7.53507	-9.26039	-5.19876	-5.64472	-10.7002	-8.38617	-9.91676	-7.71282	-10.5054	-11.5982	-11.4267	-7.58956	-7.47265	-11.2315	-8.94689	-10.9378	-7.8749	-11.9111	-8.85855	-12.7872	-9.92626	-10.1968	-12.012	-9.10544	-9.53424	-11.0316	-11.7127	-7.37431	-10.7366	-9.99011	-11.7934	-11.3979	-10.1877	-11.384	-8.16738	-10.4142	-8.72309	-14.6263	-10.4088	-6.44606
267.5	748.5	11.1333	4.55736	-10.008	-8.15406	-6.19233	-7.80719	-8.04989	-9.1128	-7.00677	-9.04747	-5.50767	-4.77202	-7.59696	-8.5198	-10.8179	-10.5655	-11.0959	-12.9696	-10.9298	-9.20987	-8.71859	-12.543	-9.95719	-11.696	-10.1376	-12.857	-9.87228	-13.195	-8.21268	-9.60859	-10.4859	-10.3868	-10.0612	-7.73797	-10.4406	-8.76198	-10.3022	-11.4179	-9.54156	-9.12528	-10.3946	-10.4953	-9.13245	-12.685	-9.38638	-10.4859	-11.9229	-7.64894
266.5	757.5	11.1332	4.55655	-6.9424	-4.19794	-6.87796	-5.67619	-4.5733	-4.58906	-5.719	-5.51086	-6.72682	-7.98948	-4.12544	-4.98098	-3.38574	-6.81462	-6.87623	-7.56346	-10.7185	-12.8628	-5.16988	-11.6944	-8.18421	-8.3434	-8.88244	-12.4203	-8.7604	-9.26878	-5.34319	-9.57742	-10.3658	-8.20273	-8.87261	-9.38233	-8.61136	-9.47811	-7.67919	-12.0581	-9.71441	-6.5764	-10.1894	-7.91186	-6.7935	-11.7297	-9.08163	-9.03514	-9.61067	-9.62548
266.5	758.5	11.1332	4.55646	-9.24872	-4.02663	-7.40189	-6.0422	-5.57829	-7.39317	-6.6016	-4.80737	-6.65427	-9.27681	-5.72562	-6.52805	-3.05695	-9.07145	-6.23953	-7.35986	-9.91617	-13.2449	-6.07049	-10.9482	-9.53301	-6.37896	-9.20838	-12.9593	-7.68769	-8.93375	-5.00092	-10.0325	-9.2532	-8.23055	-10.8222	-9.48744	-6.91065	-8.0568	-7.87825	-11.0443	-8.91801	-7.23338	-11.0272	-6.77947	-5.15777	-10.4518	-10.8339	-9.37237	-10.1952	-7.87029
265.5	760.5	11.1331	4.55629	-6.32678	-7.30291	-11.3366	-10.006	-10.0696	-9.71085	-6.96704	-5.99135	-4.72176	-7.66366	-3.95411	-8.47384	-5.74418	-9.08755	-7.33892	-9.8939	-9.50516	-8.8149	-9.55454	-10.0505	-12.6505	-8.20684	-11.8239	-10.8277	-6.52222	-3.16987	-9.34063	-13.7502	-6.15399	-9.12867	-10.3307	-9.07444	-5.80884	-8.02216	-9.26501	-7.63264	-6.86286	-5.78061	-8.26634	-7.2438	-8.1224	-11.3664	-8.35542	-6.78115	-11.5127	-10.9415
264.5	762.5	11.1331	4.55611	-8.93192	-4.78957	-8.09319	-5.25973	-12.0517	-13.22	-9.26091	-8.3152	-5.05458	-4.20893	-5.11209	-9.89984	-8.92928	-7.6125	-10.3811	-10.2688	-13.2305	-6.64407	-8.65617	-10.4421	-11.2736	-10.3979	-12.4668	-12.2374	-8.43253	-7.06572	-9.42199	-9.74158	-7.22246	-10.9287	-12.5243	-6.99789	-9.26842	-8.07581	-6.63094	-10.7981	-9.22758	-4.70952	-6.71887	-8.7812	-8.94786	-8.87029	-9.89526	-7.06816	-11.6112	-13.6041
264.5	763.5	11.1331	4.55602	-11.4622	-5.85196	-7.47609	-3.83104	-11.2871	-10.2622	-7.17833	-6.9284	-4.80581	-4.33047	-5.90062	-8.52559	-6.70287	-9.64362	-11.8331	-9.779	-10.6069	-6.7254	-11.6086	-12.0088	-11.3291	-8.78036	-15.3602	-13.7425	-9.53357	-9.7335	-8.45505	-8.88793	-7.83498	-10.7835	-12.2954	-9.67971	-8.71261	-8.59314	-7.7683	-9.79604	-8.82815	-6.14699	-7.12162	-8.49571	-9.09451	-8.92096	-12.6336	-9.24422	-11.2326	-12.7905
267.5	768.5	11.1333	4.55557	-10.2927	-4.8995	-10.0851	-7.3715	-8.95261	-7.38122	-8.77016	-6.32545	-7.65705	-7.65536	-10.636	-9.92562	-5.58687	-10.5546	-4.81124	-9.12451	-8.44855	-7.32158	-7.83901	-8.82181	-11.0455	-5.34567	-7.59451	-7.19541	-7.34479	-7.1085	-9.30352	-8.21717	-10.4489	-8.3968	-10.7631	-9.11129	-10.9028	-7.55388	-10.5075	-9.94935	-9.18926	-6.79396	-8.58189	-11.9056	-11.2322	-12.1188	-9.36862	-10.9538	-7.633	-8.72158
270.5	769.5	11.1336	4.55547	-7.22122	-6.90459	-9.62241	-5.1111	-9.95951	-6.15129	-7.68442	-8.58142	-4.96777	-5.10661	-7.86263	-7.98498	-8.24887	-5.48984	-8.10367	-6.90079	-7.11251	-8.74427	-8.56051	-13.0112	-7.60758	-10.2455	-8.04782	-10.8139	-11.8	-6.54474	-10.4903	-8.66416	-4.73646	-11.2735	-4.97696	-7.71736	-8.30157	-8.90843	-5.08315	-6.15131	-7.38774	-6.3457	-8.20351	-7.84298	-4.83373	-4.50635	-10.806	-6.97638	-7.16376	-6.74808
271.5	769.5	11.1337	4.55547	-7.70466	-7.29265	-9.7762	-6.80865	-8.262	-6.97031	-9.62103	-8.64917	-6.15513	-5.10017	-5.35943	-8.71393	-7.92166	-5.16115	-5.54728	-7.5745	-5.86777	-10.7853	-8.2324	-12.1609	-7.69702	-8.95258	-8.68194	-7.82933	-10.8792	-6.87206	-10.5916	-10.2958	-4.65496	-12.0618	-5.95105	-7.352	-6.88921	-10.9976	-6.24813	-6.46427	-6.97351	-6.22136	-9.08339	-5.07273	-4.99559	-6.02916	-11.5728	-6.14119	-9.66015	-6.12073
272.5	769.5	11.1338	4.55547	-6.19347	-5.63564	-9.20101	-9.401	-7.88254	-8.00892	-13.6439	-6.88947	-6.92114	-5.40887	-4.58474	-8.54641	-8.03615	-7.32899	-5.74269	-9.56274	-6.78472	-9.89456	-8.18956	-9.68244	-8.84393	-7.21355	-8.70896	-7.63348	-11.9586	-9.6599	-7.66448	-10.4582	-5.91334	-11.827	-8.67098	-7.77166	-7.85229	-10.3578	-8.29185	-7.1791	-8.4777	-7.85074	-10.8341	-5.26272	-7.21313	-8.76945	-12.4625	-7.80426	-7.97575	-6.15124
273.5	782.5	11.1338	4.55431	-9.04942	-6.68574	-10.9722	-11.3291	-6.71608	-7.84168	-8.88311	-10.9872	-6.74463	-5.56701	-6.77553	-9.60958	-7.17655	-4.95331	-6.91364	-8.58447	-7.23812	-8.13367	-7.91136	-8.86854	-8.1627	-8.55709	-6.18571	-11.0167	-8.51675	-7.79146	-8.1169	-6.90426	-5.56588	-6.84693	-8.02576	-7.77756	-7.2148	-7.45365	-6.5626	-5.04955	-6.7278	-8.86678	-3.80789	-6.53257	-6.22441	-5.27375	-6.95156	-6.08699	-9.47634	-7.62462
273.5	783.5	11.1338	4.55422	-9.43262	-7.28387	-9.7717	-10.4898	-7.00941	-8.69921	-9.22198	-10.0162	-8.79386	-4.08455	-6.7717	-7.73023	-7.51701	-5.255	-7.05519	-6.10718	-6.85529	-6.59027	-7.68173	-6.345	-6.58126	-7.80266	-4.59498	-9.67077	-8.35853	-7.55763	-7.22478	-8.76872	-6.84015	-7.86398	-7.96252	-10.1416	-8.00394	-5.45456	-7.81238	-7.01758	-5.34607	-9.75099	-5.50986	-4.84301	-7.03888	-5.65018	-5.54986	-4.16765	-9.74398	-8.53248
272.5	784.5	11.1337	4.55413	-7.29018	-8.55439	-7.36897	-9.19471	-6.97267	-9.75428	-8.82451	-7.02565	-9.96224	-9.12779	-6.95307	-8.09707	-8.03542	-9.95798	-8.19139	-6.75021	-4.90147	-7.381	-10.3632	-5.42985	-6.29276	-6.8037	-4.72535	-7.77987	-4.8152	-7.40496	-7.57138	-9.98498	-8.41983	-5.60365	-8.68185	-7.17635	-9.31404	-8.77295	-9.16261	-8.91403	-8.49776	-6.73117	-8.23696	-7.41559	-7.84136	-6.62205	-7.08203	-7.24327	-9.41238	-8.91171
272.5	785.5	11.1337	4.55404	-9.72384	-8.08036	-7.97145	-8.74902	-8.62793	-11.4708	-9.13452	-6.87559	-7.02322	-10.5051	-6.01939	-8.53847	-8.0489	-13.5506	-7.51518	-9.11325	-4.62525	-8.38054	-9.57513	-4.57636	-6.26727	-5.90984	-3.33301	-6.39347	-4.91895	-7.47814	-8.57312	-7.98496	-8.44566	-4.9933	-11.0502	-6.36327	-5.70054	-8.40176	-11.3887	-5.81735	-10.2746	-6.7994	-10.6652	-10.7706	-9.1816	-5.80908	-9.83201	-9.76848	-10.9546	-8.70426
278.5	786.5	11.1343	4.55394	-8.43275	-9.08968	-8.81828	-7.73204	-12.1008	-11.6282	-10.5953	-7.56239	-10.0792	-6.376	-6.71117	-7.13103	-7.93582	-6.08661	-10.7023	-13.4422	-12.7326	-15.6423	-13.0824	-11.3776	-9.2778	-16.0241	-16.057	-11.9525	-12.4876	-11.6475	-13.2318	-13.5262	-14.0702	-12.0677	-14.1827	-11.6371	-15.1501	-6.79403	-10.9678	-12.6115	-13.3562	-12.5379	-12.053	-12.8448	-9.49649	-11.4888	-14.2235	-11.5884	-9.4051	-6.52414
279.5	786.5	11.1344	4.55394	-8.50251	-7.55966	-10.3241	-7.72629	-12.3344	-11.8276	-11.936	-8.68047	-10.5057	-6.19056	-7.36082	-6.43751	-6.00192	-7.54859	-11.9196	-10.9495	-11.5843	-13.9669	-12.0318	-11.2039	-8.26674	-14.4491	-10.7544	-11.2998	-8.02831	-11.9419	-12.7268	-14.7832	-14.8255	-10.6385	-13.7441	-16.2396	-14.5863	-6.50341	-10.4745	-11.9642	-12.8264	-14.6014	-13.1422	-12.7216	-16.3119	-11.0143	-15.5369	-10.3589	-13.7512	-8.04659
277.5	787.5	11.1342	4.55386	-7.40112	-15.2185	-10.3724	-9.39915	-9.91625	-11.6485	-13.6382	-10.6958	-10.6892	-11.0165	-9.48237	-9.05875	-10.3792	-6.66439	-8.24077	-13.1103	-14.4298	-12.9113	-9.16798	-11.1174	-12.3155	-13.9399	-10.2607	-15.1541	-6.61487	-9.48852	-11.1048	-9.70461	-9.00586	-9.69354	-12.0727	-5.41889	-10.683	-8.78052	-11.0999	-7.11821	-8.81972	-8.10718	-7.45949	-7.61072	-5.93078	-7.96717	-10.0818	-9.09678	-8.32218	-7.67781
276.5	788.5	11.1341	4.55377	-7.34032	-10.4942	-11.6809	-12.4859	-7.76631	-10.62	-11.6835	-13.156	-8.00606	-10.7776	-10.0688	-7.53286	-9.9624	-9.17051	-11.7141	-9.98525	-9.41022	-5.99	-9.13368	-9.33578	-15.1339	-12.5292	-6.75459	-9.58345	-4.2691	-8.36138	-8.01403	-12.3634	-6.73559	-5.84817	-8.28095	-2.96276	-8.91355	-9.72582	-7.78629	-3.40209	-6.86996	-7.06479	-3.6896	-2.83861	-5.97919	-4.73698	-4.95044	-6.94172	-11.6204	-8.45525
274.5	789.5	11.1339	4.55368	-10.5919	-9.63961	-8.87224	-12.1151	-9.83489	-13.0634	-8.15582	-10.4568	-7.30128	-12.5854	-8.13626	-10.514	-11.8684	-9.66957	-8.09519	-9.7804	-7.07589	-5.85016	-8.80001	-10.1226	-7.5738	-9.52912	-8.41019	-4.72733	-7.1723	-9.41795	-9.26597	-10.7701	-6.53156	-8.14266	-8.06991	-7.27668	-8.60458	-9.66835	-7.35754	-5.54598	-9.74813	-12.3468	-6.73242	-7.19854	-8.74383	-8.33785	-7.69227	-6.92559	-16.6197	-11.6329
306.5	794.5	11.1368	4.5532	-9.63915	-13.5917	-8.68483	-6.47929	-10.8483	-12.7261	-10.5582	-8.1814	-10.6164	-10.3428	-8.46235	-7.51665	-7.52568	-12.7219	-7.56707	-16.9248	-12.1628	-9.9399	-10.6796	-8.88482	-11.3157	-14.3097	-10.5547	-12.4379	-12.0142	-9.69701	-10.6593	-8.91811	-10.0243	-9.3551	-11.8238	-9.66448	-7.08312	-12.455	-7.12517	-9.37124	-10.6642	-12.9179	-9.06517	-9.23767	-9.51871	-11.4453	-9.14538	-9.24359	-8.02226	-12.0798
307.5	794.5	11.1369	4.5532	-8.54828	-11.7948	-10.7658	-8.08239	-15.4803	-15.0555	-11.7585	-8.64059	-10.7355	-9.33458	-10.5179	-7.37465	-7.58613	-11.6902	-8.52294	-14.3399	-10.8669	-11.0918	-11.0713	-8.72044	-11.4427	-13.5099	-11.3918	-12.9852	-12.7202	-10.3491	-9.32959	-12.6564	-13.5717	-8.41536	-11.1535	-8.42623	-6.99037	-10.2952	-8.45806	-7.59052	-8.44931	-10.6862	-7.92598	-10.723	-9.05691	-9.52071	-10.3412	-8.43153	-5.83757	-9.43798
308.5	794.5	11.1369	4.5532	-10.6785	-11.0159	-11.2872	-9.06663	-11.5012	-12.7215	-11.7286	-9.74637	-11.2219	-11.2	-11.1018	-10.9926	-9.00345	-9.40186	-10.1961	-10.6059	-8.08203	-12.5913	-11.5521	-10.3033	-12.8735	-9.94754	-10.4271	-11.2784	-13.6123	-10.0405	-11.7232	-11.8465	-14.4993	-8.70711	-12.5939	-8.57824	-7.59488	-9.97858	-11.3609	-7.64745	-7.44185	-8.91	-8.61904	-9.34727	-8.30616	-8.62112	-10.6123	-10.2398	-3.69663	-7.81072
455.5	850.5	11.15	4.54803	-9.85747	-8.48901	-5.79444	-7.26225	-7.43146	-9.9136	-9.86552	-6.23709	-9.15352	-6.46218	-5.82157	-10.635	-5.53798	-7.67733	-12.6617	-12.3551	-12.9684	-14.1236	-13.9461	-13.9306	-12.1642	-14.2657	-10.5943	-12.9172	-10.4174	-12.0331	-11.2049	-16.5225	-14.1423	-8.45767	-8.62064	-11.5725	-10.1889	-5.73726	-10.7383	-10.0881	-9.3557	-10.8076	-11.1562	-12.6708	-15.2742	-10.8371	-13.5956	-12.8819	-15.5399	-13.0064
454.5	851.5	11.1499	4.54794	-8.81313	-10.0997	-6.57522	-10.7973	-8.14784	-9.87125	-11.7602	-9.40829	-10.8539	-7.90593	-5.78368	-10.5284	-8.14029	-7.11192	-8.91028	-13.9975	-14.5466	-12.3508	-10.3698	-14.64	-13.5463	-13.8737	-11.0264	-12.5371	-14.8172	-14.5402	-9.93948	-13.9742	-11.7165	-8.53869	-9.18466	-14.8595	-10.2313	-6.40543	-10.0139	-10.9672	-11.3721	-10.3753	-9.08249	-12.077	-12.1419	-11.6831	-14.0308	-12.2652	-16.8225	-18.1234
455.5	851.5	11.15	4.54794	-9.91491	-8.76044	-5.76975	-8.01832	-9.23764	-9.80515	-10.41	-6.72262	-9.74878	-7.87017	-7.47211	-8.96878	-4.94353	-6.97274	-11.3735	-14.3189	-16.4292	-12.4843	-11.5521	-11.9453	-11.9275	-13.6711	-9.86164	-12.3661	-11.9923	-11.4002	-11.6007	-14.6023	-12.9091	-7.75834	-8.60428	-9.8662	-9.84422	-4.42225	-10.0804	-12.0184	-11.7003	-11.4915	-9.68726	-11.6968	-13.2999	-11.3462	-13.1114	-14.3132	-16.9309	-17.6351
454.5	852.5	11.1499	4.54785	-7.63404	-8.38785	-8.04045	-11.5066	-11.3497	-9.28978	-8.55734	-9.87398	-10.654	-9.77828	-7.48163	-8.73314	-9.83901	-6.56282	-11.4324	-14.5669	-14.073	-12.5086	-10.8312	-14.403	-12.594	-11.8004	-10.8785	-10.0716	-16.1205	-12.1876	-10.7332	-13.3242	-11.353	-10.2141	-11.0492	-12.3698	-12.3123	-3.93083	-10.354	-13.0006	-10.7821	-11.0174	-8.37555	-13.2332	-10.3397	-13.2628	-16.1247	-11.1301	-14.1257	-13.3542
454.5	853.5	11.1499	4.54777	-6.34802	-8.89178	-9.21305	-9.30815	-11.2037	-9.33476	-6.89596	-10.2947	-10.7998	-12.8779	-7.1931	-6.98434	-12.1335	-6.92719	-13.7096	-14.9018	-12.1564	-12.2764	-13.9609	-16.4676	-13.9042	-11.7291	-11.34	-9.72848	-14.9104	-10.4066	-12.1833	-14.623	-13.1846	-12.2311	-12.8611	-10.8054	-14.1833	-5.22943	-10.669	-12.4273	-9.02601	-14.9908	-9.0894	-13.4107	-10.4062	-16.8902	-15.5162	-12.8226	-13.6067	-10.477
[truncated: 6 more columns]

## Sheet: SavannahShrub
Pixel-X	Pixel-Y	Longitude	Latitude	Sigma0_VV_db_mst_07Apr2015	Sigma0_VV_db_slv2_25May2015	Sigma0_VV_db_slv4_06Jun2015	Sigma0_VV_db_slv6_18Jun2015	Sigma0_VV_db_slv8_12Jul2015	Sigma0_VV_db_slv10_24Jul2015	Sigma0_VV_db_slv16_05Aug2015	Sigma0_VV_db_slv18_17Aug2015	Sigma0_VV_db_slv20_10Sep2015	Sigma0_VV_db_slv22_22Sep2015	Sigma0_VV_db_slv24_04Oct2015	Sigma0_VV_db_slv26_16Oct2015	Sigma0_VV_db_slv28_28Oct2015	Sigma0_VV_db_slv30_21Nov2015	Sigma0_VV_db_slv32_03Dec2015	Sigma0_VV_db_slv34_15Dec2015	Sigma0_VV_db_slv36_08Jan2016	Sigma0_VV_db_slv38_20Jan2016	Sigma0_VV_db_slv40_13Feb2016	Sigma0_VV_db_slv42_08Mar2016	Sigma0_VV_db_slv44_20Mar2016	Sigma0_VV_db_slv46_01Apr2016	Sigma0_VV_db_slv48_13Apr2016	Sigma0_VV_db_slv50_07May2016	Sigma0_VV_db_slv54_19May2016	Sigma0_VV_db_slv56_31May2016	Sigma0_VV_db_slv58_12Jun2016	Sigma0_VV_db_slv60_06Jul2016	Sigma0_VV_db_slv62_18Jul2016	Sigma0_VV_db_slv64_30Jul2016	Sigma0_VV_db_slv66_11Aug2016	Sigma0_VV_db_slv68_23Aug2016	Sigma0_VV_db_slv70_04Sep2016	Sigma0_VV_db_slv72_16Sep2016	Sigma0_VV_db_slv74_28Sep2016	Sigma0_VV_db_slv76_10Oct2016	Sigma0_VV_db_slv78_22Oct2016	Sigma0_VV_db_slv80_03Nov2016	Sigma0_VV_db_slv82_15Nov2016	Sigma0_VV_db_slv84_27Nov2016	Sigma0_VV_db_slv86_21Dec2016	Sigma0_VV_db_slv88_02Jan2017	Sigma0_VV_db_slv90_14Jan2017	Sigma0_VV_db_slv92_26Jan2017	Sigma0_VV_db_slv94_07Feb2017	Sigma0_VV_db_slv96_19Feb2017
333.5	611.5	11.1394	4.56956	-4.20166	-9.65306	-10.1181	-8.0136	-6.37349	-8.61131	-9.84304	-13.489	-8.72429	-8.5939	-7.44603	-9.29967	-9.26836	-12.375	-13.436	-13.6913	-11.3848	-10.1472	-10.1845	-8.71119	-7.9318	-11.9972	-7.96242	-7.50522	-10.4325	-11.789	-14.4117	-13.2749	-11.422	-5.71673	-10.5199	-10.9941	-13.5316	-9.4925	-8.24908	-9.59713	-13.0791	-13.8248	-13.8525	-14.2143	-12.0665	-13.2483	-14.0412	-12.3495	-7.57855	-11.0734
332.5	612.5	11.1393	4.56947	-2.53583	-7.27294	-9.99796	-6.88616	-7.47211	-7.8028	-9.89098	-15.4385	-7.19257	-10.0138	-8.38952	-6.78283	-8.02713	-9.88388	-13.7137	-14.3808	-11.831	-15.2552	-11.0851	-9.51806	-9.49777	-10.7854	-8.97498	-9.29755	-12.6144	-11.0341	-10.7185	-10.9991	-16.9762	-8.25708	-14.2883	-14.0379	-16.8133	-7.7618	-9.67853	-13.5404	-15.9141	-16.0262	-12.7019	-11.9963	-10.8666	-13.2786	-16.1098	-13.97	-8.23021	-10.2832
333.5	612.5	11.1394	4.56947	-2.92725	-7.52847	-13.3148	-6.47627	-7.38854	-8.07375	-10.8157	-12.538	-11.6389	-10.3917	-6.58452	-7.38116	-11.3204	-10.3727	-16.161	-13.8852	-12.4447	-12.1898	-10.7139	-10.1708	-8.53841	-12.6595	-9.48274	-6.93999	-12.1814	-13.0168	-12.7984	-12.7161	-11.4403	-6.10253	-11.683	-12.2006	-13.2372	-8.08485	-7.54152	-10.431	-12.7191	-11.9093	-12.734	-13.9008	-14.3872	-12.9739	-11.4334	-12.6506	-10.7444	-14.3559
334.5	612.5	11.1395	4.56947	-3.4861	-10.9044	-11.2776	-7.70417	-8.04533	-8.51957	-9.77141	-10.6079	-13.3248	-9.73219	-5.53648	-7.49851	-9.74561	-9.71972	-17.7284	-12.1917	-10.9621	-9.34175	-9.33448	-9.51645	-8.71226	-14.8272	-9.55711	-7.45705	-12.0495	-13.0417	-10.8431	-17.3007	-9.58597	-6.94243	-8.40206	-8.91392	-10.5491	-8.05682	-7.51507	-11.2134	-8.97751	-8.88858	-10.1111	-10.703	-11.496	-11.1026	-9.64091	-12.0408	-13.0137	-18.6291
331.5	613.5	11.1392	4.56938	-2.90304	-9.8263	-9.62933	-7.73334	-7.83647	-10.2159	-8.34984	-13.681	-7.61378	-11.4118	-10.3636	-7.15749	-9.48918	-9.74343	-11.7261	-10.9433	-12.968	-15.2886	-9.88919	-13.7593	-15.3454	-11.0543	-10.3291	-9.92835	-11.9048	-12.5028	-13.366	-12.2649	-17.2002	-12.477	-10.6131	-11.0195	-10.9758	-7.69845	-14.1402	-11.0952	-11.874	-17.7744	-8.7953	-7.67763	-14.2532	-12.6954	-15.7752	-13.1402	-13.3005	-10.2084
332.5	613.5	11.1393	4.56938	-0.803679	-7.64789	-11.3024	-5.67888	-7.34778	-8.22828	-8.88079	-14.7752	-9.69175	-10.8479	-10.9997	-6.73259	-9.65421	-9.57632	-13.2659	-14.7597	-14.9124	-14.5063	-9.4802	-10.5573	-11.5036	-10.3788	-10.5202	-9.77055	-15.085	-12.464	-11.5929	-12.1097	-15.7798	-8.05041	-15.8618	-15.0671	-15.751	-7.55544	-9.88155	-13.6474	-16.9031	-13.2356	-10.6793	-12.0029	-15.2149	-12.944	-12.9468	-17.1895	-12.9724	-13.7126
333.5	613.5	11.1394	4.56938	-2.64079	-7.8563	-13.1946	-6.09948	-7.18663	-8.06142	-9.09647	-11.8852	-13.191	-10.1099	-8.51373	-7.10722	-10.4221	-9.12485	-16.3467	-13.765	-13.1289	-15.1164	-9.72442	-9.97079	-10.5053	-12.177	-12.1699	-8.30831	-12.478	-11.6587	-11.8258	-13.5455	-10.2078	-7.18777	-12.8514	-12.7495	-12.3344	-9.23458	-8.50168	-11.7857	-13.8289	-10.0074	-9.30248	-12.6356	-15.895	-9.87321	-9.71799	-14.0193	-12.9126	-14.7438
334.5	613.5	11.1395	4.56938	-4.96666	-11.9746	-12.467	-8.63054	-7.54778	-10.1575	-8.58195	-11.842	-12.3365	-10.6435	-6.61729	-7.68388	-9.30967	-8.72533	-16.6153	-11.4589	-10.872	-11.219	-10.1051	-10.3065	-8.35679	-13.4318	-10.1124	-8.11027	-11.8921	-11.5056	-10.2659	-19.6901	-9.44862	-7.96342	-10.4357	-10.4493	-11.4091	-8.22464	-8.47573	-10.7164	-9.66042	-8.87308	-7.99887	-10.1086	-12.9471	-9.02128	-9.17318	-13.0922	-12.2256	-16.523
335.5	613.5	11.1395	4.56938	-5.89598	-12.9174	-12.2377	-10.1889	-5.98908	-11.2156	-8.33866	-13.4347	-11.4867	-11.0321	-6.68123	-8.34627	-8.25278	-9.10851	-14.7613	-10.9235	-11.0398	-7.47614	-10.524	-10.523	-6.78682	-10.1664	-6.85353	-7.20046	-10.8229	-12.9381	-7.6822	-13.5244	-10.9705	-7.87212	-9.78582	-10.9505	-11.3208	-7.23406	-9.94573	-11.2546	-7.75239	-8.77071	-7.78177	-7.34238	-11.9085	-10.363	-10.2302	-12.1516	-11.7527	-14.5766
330.5	614.5	11.1391	4.56929	-9.00376	-11.2533	-10.0938	-8.98288	-9.27447	-11.6082	-8.64767	-12.2491	-10.6267	-8.86344	-10.6247	-8.95007	-11.1228	-11.4303	-12.2982	-11.9079	-13.6819	-16.1885	-11.53	-17.3408	-15.8801	-17.7176	-11.2596	-12.9578	-10.0058	-12.6851	-15.5436	-11.7418	-12.5973	-11.3188	-10.9284	-13.3369	-8.64327	-7.9244	-15.2381	-8.88705	-8.84596	-13.006	-9.48966	-7.25352	-10.7963	-12.8463	-13.8906	-13.1525	-15.0308	-10.8578
331.5	614.5	11.1392	4.56929	-4.37093	-12.4817	-10.7164	-7.40273	-8.34617	-11.7563	-7.34727	-14.3497	-9.88459	-11.4538	-11.8181	-8.05844	-10.9443	-10.819	-11.8602	-12.3614	-14.8388	-16.0468	-9.71618	-13.6583	-17.139	-13.5648	-12.5742	-13.4921	-12.039	-13.644	-14.9297	-12.3675	-15.9726	-10.5651	-12.4104	-11.03	-11.1038	-8.18034	-11.9175	-11.7959	-11.9285	-15.1612	-10.2113	-9.51477	-17.5467	-14.9176	-12.9991	-15.7116	-14.0089	-11.8291
332.5	614.5	11.1393	4.56929	-2.4835	-10.0126	-10.6785	-7.12535	-7.16838	-9.99334	-7.83009	-13.7372	-10.3568	-11.1623	-12.4359	-8.17592	-9.90036	-10.3542	-12.8612	-13.9346	-17.0804	-15.013	-9.6044	-10.1647	-13.8814	-10.9028	-11.8327	-12.9541	-12.1709	-10.2982	-11.7779	-14.2892	-11.6203	-8.0388	-14.192	-12.8716	-14.3099	-8.97211	-9.54164	-14.9465	-16.0668	-12.453	-8.37494	-11.8806	-18.8839	-9.93263	-11.4626	-14.6234	-11.2319	-13.3346
333.5	614.5	11.1394	4.56929	-5.19241	-10.0201	-10.8032	-8.56396	-7.09308	-9.97148	-7.97638	-12.2304	-11.9639	-10.1096	-10.8872	-7.91149	-9.8676	-9.43406	-13.8609	-13.6652	-14.5089	-18.5552	-10.5326	-9.96373	-12.7845	-11.8954	-11.5062	-11.1141	-10.1198	-9.02488	-10.9488	-14.6088	-8.41779	-7.85743	-11.4623	-12.789	-11.8194	-10.3875	-9.64257	-13.5818	-13.8257	-11.2555	-7.20427	-10.2577	-16.0453	-7.84571	-10.6128	-12.7336	-12.4596	-12.0499
334.5	614.5	11.1395	4.56929	-8.10791	-10.7916	-11.2814	-10.8973	-7.82033	-9.69698	-6.8717	-12.9695	-11.5478	-11.5189	-8.30062	-8.14528	-9.58152	-10.1452	-14.3738	-11.2876	-12.1009	-13.0655	-11.8355	-11.3827	-9.30954	-13.9424	-9.55676	-9.71834	-10.614	-9.89296	-10.1256	-15.6726	-8.70083	-9.38015	-9.54171	-11.3852	-11.409	-9.82809	-10.0528	-12.0161	-12	-10.7363	-7.48459	-9.15189	-13.9954	-8.27438	-11.7118	-12.1728	-12.6027	-14.8001
335.5	614.5	11.1395	4.56929	-6.19747	-10.1563	-12.208	-12.9465	-6.25336	-9.90227	-7.2607	-15.4934	-10.0727	-14.7144	-7.57902	-9.06712	-9.36965	-11.5754	-13.0501	-10.5743	-12.4591	-8.30138	-11.7597	-10.1843	-7.66583	-11.5727	-7.21952	-7.82136	-9.99406	-12.0827	-8.01521	-12.6223	-10.5311	-10.9953	-8.62205	-11.5343	-11.1203	-9.91995	-10.8919	-11.121	-11.1665	-10.2522	-8.11521	-7.90664	-14.1777	-9.55711	-12.0354	-11.9339	-11.7466	-13.701
336.5	614.5	11.1396	4.56929	-4.20458	-10.305	-11.7237	-10.1025	-5.62049	-10.0261	-10.2011	-13.9484	-10.9744	-13.6477	-7.99968	-9.3414	-8.38652	-9.54969	-11.324	-10.8646	-13.0099	-8.22655	-10.4185	-8.93565	-8.58054	-9.46138	-7.66611	-7.69975	-8.95374	-12.2748	-7.56944	-11.6571	-10.9794	-11.1814	-8.73077	-12.7709	-11.1197	-10.1715	-12.0834	-8.69888	-10.5119	-10.1977	-9.04291	-7.99071	-13.9146	-10.1125	-11.1477	-11.4357	-12.6108	-10.2029
331.5	615.5	11.1392	4.5692	-5.97595	-13.2624	-9.67551	-8.28299	-8.05418	-10.083	-6.49747	-13.0955	-10.2048	-10.7815	-11.102	-9.80408	-12.0613	-12.0599	-13.1712	-14.1589	-12.8321	-15.3783	-9.25354	-11.7224	-16.1597	-14.2967	-12.4051	-15.089	-11.2855	-11.8946	-11.8198	-14.4183	-11.9499	-8.75607	-12.781	-11.4273	-10.4465	-9.26859	-11.2274	-12.8315	-13.3718	-13.2949	-11.212	-13.0218	-14.3999	-13.4813	-11.8936	-15.843	-11.1034	-12.3752
332.5	615.5	11.1393	4.5692	-6.54505	-10.2498	-7.99183	-10.3684	-8.03758	-9.84419	-6.49804	-12.2665	-10.82	-11.4959	-11.1971	-9.31503	-10.2946	-11.1241	-12.9491	-13.4709	-16.6419	-13.687	-9.54114	-9.71027	-13.7988	-11.3058	-11.5832	-13.4338	-10.6638	-8.08482	-10.7287	-14.4275	-10.1883	-7.37187	-13.0915	-12.4113	-11.6651	-11.2806	-9.90183	-14.1597	-13.0688	-13.25	-8.05562	-11.0427	-15.3931	-8.48644	-12.3485	-13.0484	-9.90886	-13.8646
333.5	615.5	11.1394	4.5692	-11.1402	-9.34985	-8.12882	-12.1721	-7.6294	-8.55819	-5.84082	-12.4	-11.8149	-10.2472	-10.0343	-8.53449	-10.9699	-9.62113	-13.3092	-12.5516	-14.0366	-18.8407	-10.5867	-10.0748	-12.5466	-12.0158	-9.88973	-12.3614	-9.73239	-7.62015	-10.8968	-13.3337	-8.48943	-7.96138	-10.3918	-12.5776	-9.76863	-9.86876	-10.9009	-13.4815	-11.289	-12.3203	-7.58602	-9.32323	-14.4679	-8.14647	-12.2953	-10.8588	-13.228	-12.9134
334.5	615.5	11.1395	4.5692	-9.63003	-8.55075	-10.3157	-11.2104	-8.39008	-7.7566	-5.9023	-12.1568	-10.4591	-11.8304	-8.91226	-8.8861	-11.2377	-10.9624	-14.7342	-11.9724	-12.0972	-15.3712	-11.7923	-10.3036	-11.125	-13.8356	-8.56956	-10.939	-10.4848	-9.12296	-11.4283	-12.0045	-8.86075	-9.84534	-8.89563	-11.0889	-9.69469	-9.52731	-11.6448	-12.6398	-11.1914	-10.7527	-8.69114	-8.83112	-12.416	-9.07231	-12.7027	-11.2584	-15.0709	-15.5903
332.5	616.5	11.1393	4.56911	-6.40503	-8.53484	-6.58835	-11.8405	-9.03594	-8.97082	-4.33874	-11.0517	-12.7287	-14.2745	-8.44367	-8.76458	-10.1529	-10.7875	-13.3209	-12.2824	-13.1054	-11.5945	-9.20682	-10.0848	-10.6545	-11.1546	-11.3948	-11.3853	-11.921	-8.05497	-11.9096	-13.9085	-12.9729	-7.69261	-12.1737	-11.5766	-10.407	-8.58037	-12.1813	-14.1648	-11.118	-13.291	-10.1807	-11.3192	-13.1481	-11.1397	-13.6875	-13.357	-10.7276	-16.1778
333.5	616.5	11.1394	4.56911	-9.88971	-8.33928	-6.92818	-12.4165	-7.52405	-7.49041	-3.42353	-11.5697	-10.9333	-11.1297	-6.89592	-9.45398	-10.7152	-9.30724	-13.9252	-12.1734	-11.233	-16.1348	-9.94643	-9.95246	-9.25062	-11.6001	-8.50586	-10.9505	-11.6443	-8.27453	-11.982	-11.9434	-12.3899	-8.5991	-10.362	-11.4578	-8.15716	-7.19702	-13.5312	-13.5709	-9.2927	-12.6015	-9.87744	-9.88889	-12.204	-10.3918	-13.9235	-11.8289	-13.3867	-15.9718
231.5	622.5	11.1303	4.56868	-0.291154	-5.69847	-8.42715	-7.17698	-7.08669	-7.88915	-8.12874	-12.0762	-5.8437	-8.14247	-7.11199	-6.25402	-4.86478	-10.6149	-7.28696	-10.4119	-9.40869	-6.90901	-7.37391	-7.11438	-11.1535	-7.79397	-8.66958	-10.313	-8.00549	-9.82211	-6.87746	-8.71289	-9.5171	-8.58521	-6.22836	-8.41096	-11.2788	-8.41563	-10.363	-7.00729	-7.17545	-9.57502	-8.72135	-5.2484	-8.39549	-7.64612	-7.20331	-7.62347	-9.43872	-10.7682
232.5	622.5	11.1303	4.56868	-1.61143	-6.08341	-8.93497	-7.68645	-6.67282	-7.61849	-7.99048	-10.3906	-4.9696	-7.67749	-6.23661	-5.39803	-5.73558	-8.37865	-6.19471	-11.1509	-9.59054	-7.50334	-6.6764	-7.37627	-10.3267	-8.76765	-8.66659	-9.86688	-7.33165	-8.50179	-8.02486	-7.16929	-9.17855	-9.40721	-6.25455	-11.8481	-10.381	-6.54074	-9.38683	-7.19294	-8.49569	-8.50753	-7.85962	-5.88002	-9.50151	-7.63929	-6.83819	-6.3437	-8.7417	-10.8058
233.5	622.5	11.1304	4.56868	-3.17446	-5.90702	-9.39094	-8.23846	-8.14725	-8.21278	-8.22428	-9.62177	-5.581	-7.74497	-7.60419	-5.68971	-8.34474	-9.74492	-7.75131	-10.996	-10.8027	-8.53177	-6.60536	-8.14331	-8.92061	-9.14156	-10.3975	-7.93319	-6.84396	-7.78625	-7.67404	-5.35	-8.21484	-9.47841	-6.82249	-13.2943	-9.61868	-5.98639	-9.11511	-7.06499	-10.0816	-7.64092	-7.57821	-7.34389	-9.7257	-9.57101	-7.94106	-5.97838	-10.261	-10.7238
234.5	622.5	11.1305	4.56868	-3.98569	-5.67434	-11.0876	-9.00966	-8.18115	-8.00275	-8.7496	-11.3039	-7.19547	-8.33518	-10.4885	-7.28163	-10.3494	-10.9343	-10.5772	-9.51843	-10.8957	-8.70624	-7.86428	-8.75449	-8.14547	-8.4166	-8.13083	-8.11697	-7.39279	-9.86082	-7.93857	-5.34474	-8.06992	-9.34421	-7.00128	-11.8917	-9.23684	-7.45739	-10.4879	-7.5553	-10.6691	-7.83998	-8.79005	-8.21753	-9.0876	-10.7067	-10.7787	-7.09971	-11.1062	-12.9
235.5	622.5	11.1306	4.56867	-4.53565	-5.13409	-11.3613	-9.9956	-7.03742	-7.38741	-9.28095	-12.9928	-6.56837	-7.90885	-9.18253	-7.26504	-7.22566	-10.1433	-9.78163	-7.83375	-10.2322	-7.56417	-9.89399	-9.42355	-9.13201	-7.4908	-5.93484	-9.15239	-7.80831	-10.5659	-7.99759	-7.51627	-8.7056	-9.37841	-7.15457	-11.0317	-9.21381	-7.0733	-12.2858	-9.50336	-9.01835	-9.16286	-11.1259	-8.2369	-9.29682	-10.1799	-11.1544	-9.86159	-11.094	-12.3925
236.5	622.5	11.1307	4.56867	-6.26329	-4.59807	-11.0956	-8.37606	-5.64599	-7.21973	-9.48241	-12.3754	-6.49209	-5.6584	-5.90645	-7.0668	-4.81611	-9.23353	-8.57488	-7.76024	-9.64067	-8.179	-10.5721	-9.92964	-10.0168	-7.7444	-7.42821	-7.74022	-10.6814	-10.2431	-7.93211	-8.71364	-9.49801	-9.16903	-7.25937	-10.2186	-10.8931	-4.77425	-9.10578	-9.14622	-9.86514	-8.82835	-8.1721	-8.67441	-8.57773	-10.0176	-9.68157	-9.30416	-10.1495	-10.2441
237.5	622.5	11.1308	4.56867	-5.99992	-3.72246	-9.74626	-7.71087	-5.20891	-7.21899	-9.38321	-10.3609	-6.39508	-5.16056	-3.82188	-7.04573	-4.02594	-9.11212	-8.36557	-8.87276	-9.77085	-9.14164	-8.86484	-10.2665	-8.8928	-9.13021	-8.40439	-6.38375	-11.3325	-9.40279	-7.00965	-7.76656	-9.30277	-8.8633	-7.08441	-8.75543	-13.3691	-3.28115	-6.19153	-7.86923	-10.2656	-7.69241	-7.49117	-10.0703	-6.81055	-9.01042	-8.83709	-7.36004	-8.59233	-8.98425
231.5	623.5	11.1303	4.56859	-1.62983	-6.3496	-7.01403	-10.1269	-5.39892	-9.33122	-9.0109	-9.55458	-7.95881	-7.78158	-5.82194	-5.33003	-5.98818	-10.7516	-8.80589	-10.6882	-9.31076	-7.2408	-8.60747	-7.30866	-13.8563	-7.42228	-7.74813	-8.97422	-8.78894	-12.1399	-6.40388	-7.33248	-9.28697	-11.2832	-8.01475	-9.56265	-13.6998	-7.60501	-8.17521	-7.29989	-5.96547	-8.17655	-8.81142	-5.01536	-10.2366	-10.0858	-8.59967	-9.07275	-8.45339	-11.856
232.5	623.5	11.1303	4.56859	-2.86134	-6.57111	-8.18639	-9.27994	-5.58094	-7.07634	-8.87347	-8.24337	-7.54965	-7.18045	-4.63209	-5.21445	-6.9924	-10.6416	-8.31363	-11.9398	-8.14933	-6.44687	-8.75447	-6.8184	-11.0149	-8.10385	-8.50944	-9.2322	-8.12425	-12.2923	-5.79429	-7.01702	-10.406	-12.8242	-9.08969	-10.9774	-10.6737	-4.95774	-8.82208	-7.42444	-5.4171	-7.62648	-8.80112	-4.85149	-10.164	-9.28213	-7.29645	-7.2343	-10.4002	-10.6882
233.5	623.5	11.1304	4.56859	-3.44221	-6.6977	-9.06508	-8.39685	-6.37416	-6.87076	-9.25002	-7.16929	-7.90491	-6.97195	-6.66855	-6.22116	-8.52372	-11.3931	-10.772	-10.7727	-9.67102	-6.13551	-8.42973	-7.7696	-9.17603	-7.52846	-10.4471	-6.89503	-6.45527	-11.0482	-6.00487	-5.21207	-9.52933	-10.7607	-8.46415	-11.2117	-8.70484	-4.05274	-7.89443	-7.25722	-7.32148	-6.77572	-6.92135	-5.05784	-9.96868	-10.2877	-7.65513	-5.31217	-11.9887	-9.80113
234.5	623.5	11.1305	4.56859	-3.0665	-7.03059	-10.6063	-8.31666	-6.74977	-6.55014	-9.05992	-9.37776	-8.75799	-8.48178	-9.03662	-6.68426	-10.8276	-12.05	-12.2366	-8.74656	-11.0556	-5.80067	-9.20355	-9.1765	-8.75714	-7.96672	-7.82878	-7.44071	-7.20351	-11.1426	-7.33633	-5.74702	-9.38372	-11.0715	-6.64114	-10.211	-7.86724	-4.54464	-9.64222	-8.04904	-9.98092	-8.03868	-7.12484	-5.41221	-10.675	-10.6964	-9.16682	-5.09682	-12.0145	-10.7079
235.5	623.5	11.1306	4.56858	-4.31399	-6.74053	-13.1071	-9.11996	-6.05023	-6.07956	-7.8008	-11.0019	-8.46265	-9.26648	-7.84642	-6.09201	-9.6403	-12.0014	-10.8605	-7.38105	-9.91586	-5.86338	-11.0485	-9.70643	-9.14477	-7.96988	-6.09016	-8.55754	-8.34935	-10.3335	-8.72545	-7.74973	-9.374	-10.9732	-5.66426	-9.54875	-8.22108	-3.17622	-12.0538	-8.5132	-9.11854	-9.83381	-9.44612	-5.72968	-11.5816	-10.9586	-9.08434	-7.15361	-12.3979	-11.3828
236.5	623.5	11.1307	4.56858	-6.98555	-5.96941	-12.0369	-8.22859	-4.15162	-7.27116	-6.87338	-10.7498	-8.12709	-7.58649	-4.67528	-6.0588	-7.36396	-10.7837	-9.5277	-6.98934	-8.99859	-7.59301	-10.7487	-9.382	-9.7459	-8.30788	-5.66911	-7.87399	-9.84726	-8.53592	-9.40989	-8.43746	-9.01241	-9.25481	-5.9508	-10.3733	-9.45426	-1.42753	-9.20274	-8.19116	-9.48457	-9.2126	-9.56482	-7.20229	-9.98064	-10.6844	-9.18242	-8.01088	-12.1849	-10.2843
237.5	623.5	11.1308	4.56858	-6.2554	-5.09599	-8.46497	-7.51423	-4.23211	-7.5186	-6.74567	-9.4049	-6.85751	-6.83656	-2.75577	-6.00582	-6.18488	-9.2228	-9.14766	-7.00259	-9.74856	-8.84619	-8.79299	-9.55871	-9.60648	-8.72554	-5.26828	-6.94348	-8.64357	-7.27773	-6.8714	-7.52773	-8.99388	-7.61272	-6.81764	-9.55345	-10.5978	-0.789482	-6.15698	-7.89443	-9.79607	-7.29504	-9.01028	-8.32539	-8.00533	-9.77522	-9.83565	-7.69245	-10.4137	-9.09416
231.5	624.5	11.1302	4.5685	-5.30582	-7.77895	-5.91521	-8.98565	-3.80925	-6.83983	-9.33365	-8.51123	-10.3983	-8.06877	-6.24459	-6.71748	-8.04088	-9.84552	-10.1529	-10.6065	-8.93121	-7.86694	-12.1108	-8.30844	-11.9439	-8.52285	-8.315	-9.74966	-9.07437	-12.245	-7.28806	-6.57041	-10.1821	-13.8137	-10.7272	-9.01312	-12.1512	-5.7834	-7.21029	-8.41632	-6.05734	-6.88657	-9.80529	-6.71075	-10.9351	-11.8781	-9.4845	-10.022	-8.23805	-12.5557
232.5	624.5	11.1303	4.5685	-5.68951	-7.94734	-6.50427	-7.1654	-3.60882	-4.9719	-9.35115	-7.97009	-10.7797	-7.53924	-5.50154	-7.20152	-8.47588	-11.3606	-10.2054	-11.7158	-8.66695	-6.87391	-10.1625	-8.0918	-9.55563	-8.49107	-11.6419	-11.9174	-9.12811	-13.7093	-6.44897	-7.56896	-10.8311	-13.1079	-14.8692	-9.20506	-11.2935	-3.77676	-7.69836	-9.60978	-5.444	-6.77684	-9.22002	-5.7156	-11.1055	-11.3252	-9.21505	-9.20505	-10.9788	-10.0275
233.5	624.5	11.1304	4.5685	-4.9811	-8.91869	-7.59535	-6.33532	-3.9525	-5.40708	-8.72291	-7.08499	-11.2019	-7.67614	-6.73231	-8.34608	-7.92386	-12.0217	-10.2175	-10.9624	-10.5147	-6.31717	-9.36846	-9.3678	-9.04404	-8.58619	-11.4031	-9.0786	-6.96187	-11.4433	-6.71768	-6.73535	-10.709	-12.787	-10.6556	-9.53227	-9.49361	-4.29361	-6.4667	-9.64204	-8.2133	-6.36031	-5.74943	-4.77936	-10.4132	-11.0061	-9.91324	-7.02817	-11.7957	-8.43738
234.5	624.5	11.1305	4.5685	-3.69895	-9.28827	-8.68634	-8.17037	-4.78119	-6.80174	-7.14482	-8.62894	-10.3516	-9.04067	-8.17254	-6.74018	-9.90456	-12.9402	-10.1147	-9.56255	-11.1605	-6.31593	-9.13735	-10.7515	-9.79507	-9.95285	-8.60033	-7.87525	-7.27127	-9.99001	-7.89644	-6.70689	-10.977	-13.9924	-7.26883	-7.83073	-8.37901	-3.53239	-7.30114	-9.13622	-9.20881	-6.98676	-5.38238	-4.35508	-10.4728	-11.6173	-10.6251	-6.80427	-10.6781	-9.0298
235.5	624.5	11.1306	4.5685	-5.44204	-9.07794	-8.78812	-10.0759	-5.36857	-7.69087	-5.75546	-10.1837	-9.91268	-9.91802	-7.82737	-5.40449	-11.2366	-13.1787	-9.85089	-8.51171	-9.04971	-7.00806	-9.48741	-10.7068	-9.046	-10.5685	-6.35743	-8.16899	-8.42358	-9.35429	-9.46747	-7.43002	-9.41409	-12.7168	-5.46846	-6.78985	-7.87825	-1.04452	-9.54469	-7.93316	-9.84803	-8.82655	-7.39403	-5.06668	-10.4119	-12.1282	-10.6539	-7.52496	-10.0355	-11.0309
236.5	624.5	11.1307	4.56849	-6.96316	-8.8074	-6.85989	-9.91251	-3.85911	-9.08617	-5.4369	-10.347	-8.18039	-9.28244	-5.48512	-4.59775	-9.52856	-10.2972	-9.21271	-7.86564	-7.91312	-8.70567	-9.40364	-10.3453	-8.28222	-9.277	-4.6439	-8.5756	-8.04047	-7.89035	-9.73168	-7.97084	-8.02598	-9.17178	-4.81402	-7.42263	-8.24422	0.363791	-9.69332	-7.46792	-10.6553	-9.46144	-10.065	-6.78236	-10.5878	-11.6236	-11.1974	-7.97601	-9.4501	-11.1992
237.5	624.5	11.1308	4.56849	-5.87483	-7.43075	-5.51366	-9.38652	-3.85828	-8.41294	-5.78692	-8.3902	-5.81061	-7.94687	-4.08397	-4.11791	-7.24948	-7.74257	-8.84972	-7.16145	-8.93009	-8.38466	-8.31169	-10.5028	-8.11451	-7.46152	-4.07035	-8.74789	-5.78283	-6.69752	-6.50954	-7.20984	-8.33963	-6.81925	-5.23558	-8.08718	-8.68003	0.193927	-7.30073	-8.09519	-9.82512	-7.79721	-10.6055	-7.9196	-10.2237	-10.9516	-11.0903	-7.68739	-9.16812	-9.91204
231.5	625.5	11.1302	4.56841	-8.55554	-8.79413	-6.52278	-6.28783	-3.25317	-6.53625	-6.6767	-7.78403	-12.4523	-8.8168	-6.29872	-7.93871	-7.86966	-9.31918	-8.77615	-9.98077	-7.91183	-7.75104	-10.0887	-8.82158	-9.32939	-7.88078	-8.62022	-9.75849	-9.42309	-10.5498	-7.79957	-6.73153	-10.4496	-13.6463	-12.1763	-9.15394	-10.1937	-4.83859	-7.96478	-10.0486	-5.74874	-6.34565	-9.6453	-10.2826	-9.41629	-9.68515	-10.1584	-10.7925	-8.53161	-11.8932
232.5	625.5	11.1303	4.56841	-7.37843	-9.54379	-6.56274	-5.22447	-2.57686	-4.95221	-6.75082	-9.31378	-10.5555	-8.58422	-5.45437	-7.0892	-7.99375	-11.792	-8.90143	-9.65278	-8.799	-8.19143	-8.52441	-9.32028	-7.94885	-6.93801	-11.2469	-11.2924	-8.82346	-11.8318	-8.96108	-8.41985	-8.25568	-13.2406	-14.3128	-9.82707	-8.86476	-4.78259	-6.49163	-11.1715	-6.47424	-6.13792	-7.91104	-9.02483	-10.2817	-10.6559	-11.421	-11.0262	-10.4991	-10.7048
233.5	625.5	11.1304	4.56841	-6.29964	-10.6943	-7.26577	-5.45501	-2.81494	-5.58873	-6.56049	-8.78548	-9.1546	-9.73664	-5.18887	-6.42356	-8.20471	-13.3442	-8.31133	-9.26633	-10.4067	-7.80911	-8.40769	-10.8784	-8.0275	-8.14746	-10.1623	-10.6485	-7.25773	-10.915	-8.61416	-7.86297	-7.61524	-12.1311	-9.95677	-8.88732	-7.26073	-4.94112	-5.43346	-10.2128	-9.22492	-6.11327	-5.43909	-7.39005	-9.62944	-10.7394	-13.8109	-9.9104	-10.0373	-9.16293
234.5	625.5	11.1305	4.56841	-6.59179	-11.2607	-8.28981	-7.16051	-3.38653	-7.6875	-5.7691	-9.44519	-7.6427	-11.2188	-5.25128	-5.42931	-9.53245	-13.1596	-8.64041	-9.24149	-9.91133	-8.21387	-8.83329	-11.6001	-8.51064	-11.0625	-8.5852	-8.40841	-7.44966	-10.3498	-7.87183	-7.45936	-7.68708	-10.7698	-8.0235	-6.67593	-6.92387	-2.2563	-6.04433	-8.90844	-8.88019	-6.88831	-5.38589	-5.62497	-8.83762	-11.4384	-14.7542	-9.16047	-8.90118	-9.31696
235.5	625.5	11.1306	4.56841	-8.0484	-10.7242	-7.66548	-8.54719	-3.95181	-9.36881	-5.5353	-10.8906	-6.80621	-11.7529	-6.99565	-4.76203	-11.2508	-12.1374	-9.00138	-9.74639	-7.96876	-8.83252	-9.44352	-10.1372	-8.08232	-11.9541	-6.95556	-7.9806	-8.01078	-9.84694	-7.90351	-8.3049	-7.19226	-9.68806	-6.92099	-5.53622	-7.57029	-0.0311234	-7.50035	-8.10362	-8.76006	-8.05592	-7.21509	-5.5927	-9.02897	-12.0593	-13.8513	-8.90566	-7.82119	-10.4682
236.5	625.5	11.1307	4.5684	-7.86868	-10.1262	-5.37571	-8.0143	-4.22816	-10.4458	-5.89887	-12.2669	-6.60702	-9.75094	-8.31645	-4.31718	-8.02137	-9.25465	-8.14111	-9.87621	-6.65471	-9.02652	-9.18195	-9.53472	-7.47133	-9.1831	-5.57487	-7.92851	-6.52039	-8.49457	-7.9307	-9.58517	-6.52336	-8.71887	-6.2104	-6.0718	-8.86458	0.379506	-8.21811	-8.12585	-10.1983	-8.80235	-10.6027	-6.8238	-11.2016	-11.8531	-13.8013	-9.16831	-6.39671	-11.1263
237.5	625.5	11.1308	4.5684	-6.25746	-8.35051	-3.96633	-8.02147	-4.7997	-9.27107	-6.76737	-8.72078	-5.3712	-7.92681	-6.06939	-3.40217	-5.66423	-7.18807	-7.80689	-9.19607	-8.35508	-7.92312	-7.95025	-10.115	-7.04405	-6.69515	-5.05802	-7.12619	-4.52802	-7.4928	-6.96081	-9.04719	-7.04693	-7.6058	-6.16487	-8.47396	-10.0224	-1.23788	-8.09441	-8.86041	-12.3002	-8.66231	-11.3951	-8.31932	-13.5848	-10.9745	-12.2025	-8.64853	-6.71576	-9.85529
231.5	626.5	11.1302	4.56832	-8.38016	-8.79629	-7.01624	-7.03486	-4.78121	-8.53705	-4.53136	-7.134	-12.6812	-10.1044	-3.92072	-6.66981	-6.79918	-9.65683	-8.20087	-7.5764	-7.0399	-7.24784	-8.10305	-9.05196	-8.45678	-6.15435	-7.66572	-7.48186	-9.30858	-9.71028	-8.1254	-8.56659	-8.36702	-9.50084	-12.1566	-9.34337	-8.41436	-6.02703	-8.78938	-9.14127	-4.71069	-5.82999	-10.7433	-11.3957	-7.74018	-7.69524	-9.41666	-9.05841	-10.7252	-9.84215
232.5	626.5	11.1303	4.56832	-7.48814	-9.11963	-7.48072	-6.34116	-3.95369	-6.34413	-4.60433	-9.96483	-10.1246	-9.31894	-3.50014	-5.76985	-7.52175	-12.1925	-7.41667	-6.55676	-7.61162	-8.94149	-7.99982	-9.52537	-7.2417	-5.83352	-8.57606	-8.45523	-8.89022	-11.6957	-11.3618	-10.1716	-6.1444	-9.89503	-11.6397	-10.29	-6.66375	-7.0137	-6.37751	-9.50889	-4.6156	-5.43753	-9.83458	-11.7193	-7.82951	-9.47939	-10.2745	-9.73483	-9.77681	-11.6204
233.5	626.5	11.1304	4.56832	-7.30525	-9.11487	-8.08758	-6.691	-4.0117	-5.88887	-4.91125	-10.5591	-8.33792	-9.94591	-3.27733	-4.78331	-8.54503	-12.8708	-7.36467	-6.87884	-8.49514	-8.64485	-8.74527	-10.1326	-6.86372	-6.90864	-8.34849	-9.16087	-7.98016	-12.0951	-11.0184	-9.52779	-5.47615	-8.09822	-9.25098	-8.84619	-5.29316	-4.92531	-5.61919	-9.04659	-6.20865	-5.42265	-7.89386	-9.70879	-7.81443	-10.468	-12.623	-9.93351	-7.97575	-11.0902
234.5	626.5	11.1305	4.56832	-9.59038	-9.2988	-8.6422	-6.87868	-3.6594	-6.99312	-4.98039	-10.136	-7.18255	-11.4148	-3.52196	-4.204	-9.51176	-11.1213	-8.30574	-8.70911	-9.54803	-8.71738	-9.9213	-11.5505	-6.65619	-8.72092	-8.96828	-8.61522	-7.65677	-12.0598	-8.8543	-9.40256	-5.63286	-6.02894	-8.84152	-6.79911	-4.9669	-2.27731	-5.9083	-8.85711	-7.04668	-5.69874	-7.2532	-7.34157	-8.03364	-10.5768	-13.9313	-8.7245	-8.13912	-10.4226
235.5	626.5	11.1306	4.56832	-11.7929	-10.4141	-7.43317	-6.04324	-3.95402	-7.86968	-5.93641	-9.66161	-6.51578	-14.2778	-4.62583	-4.36193	-11.716	-9.72829	-8.49226	-10.7145	-8.45369	-9.15506	-11.0106	-10.8803	-6.53067	-10.3945	-9.29613	-7.6045	-7.07102	-10.6522	-7.73092	-10.5838	-5.87996	-5.7263	-9.55327	-5.96104	-6.751	-1.29968	-6.35013	-9.30314	-6.52356	-6.50829	-8.32787	-6.43058	-9.07236	-10.7283	-12.5097	-7.43544	-7.60424	-9.0551
236.5	626.5	11.1307	4.56832	-9.26475	-10.4662	-5.10821	-4.60676	-4.71498	-8.65112	-6.76762	-8.68413	-7.33356	-10.2229	-6.89624	-5.3022	-7.53828	-8.78594	-7.49367	-10.6796	-7.10866	-9.26846	-9.75861	-9.4813	-6.63734	-9.56284	-8.51181	-6.7714	-5.5621	-9.32101	-7.25668	-12.3509	-6.18398	-7.83893	-9.82418	-6.53492	-10.2411	-2.39427	-7.36968	-9.2209	-6.80089	-8.11464	-11.3778	-6.70379	-11.9708	-11.7578	-11.6587	-8.03358	-6.49475	-9.53392
237.5	626.5	11.1308	4.56831	-7.03671	-9.48678	-3.17529	-4.52455	-6.60802	-8.93914	-7.20438	-7.07149	-7.22066	-7.30273	-5.08229	-3.85457	-4.8163	-8.65909	-7.48788	-10.698	-9.20034	-8.34546	-7.62221	-8.56755	-7.00644	-7.94125	-7.86702	-6.30875	-4.81467	-8.90725	-7.59009	-12.1086	-7.03849	-9.15955	-8.96308	-8.74023	-11.1458	-5.02884	-8.46904	-9.69319	-9.39283	-9.223	-11.752	-7.16735	-14.6842	-11.0102	-9.88107	-9.52743	-7.1262	-9.20632
303.5	708.5	11.1366	4.5609	-8.95393	-10.0635	-7.563	-9.57176	-4.99201	-6.30952	-7.93535	-9.0794	-5.15378	-7.83223	-8.39532	-8.00815	-6.88642	-9.17552	-10.3247	-9.5655	-6.5705	-10.7264	-7.77677	-10.7785	-10.8189	-10.3034	-9.58718	-7.59187	-9.4606	-11.7159	-7.41823	-11.3048	-8.1673	-8.61825	-8.08597	-10.6611	-10.2999	-10.4373	-8.45353	-6.65476	-6.83996	-6.12844	-7.42805	-13.574	-13.4209	-15.8497	-10.2082	-11.5256	-8.79125	-9.28825
304.5	708.5	11.1367	4.5609	-8.17222	-12.9887	-7.1734	-7.36848	-5.23176	-5.69094	-8.57569	-10.3607	-5.82932	-8.33873	-8.14134	-9.50593	-5.55807	-8.08859	-11.0543	-9.89514	-6.62489	-10.265	-7.63311	-11.6442	-10.0065	-10.1404	-9.27858	-6.6879	-12.2107	-10.1218	-10.911	-8.459	-10.0753	-7.35496	-7.82131	-9.83192	-10.9436	-10.3125	-8.12666	-7.72048	-6.52307	-6.78707	-8.18354	-11.683	-11.8189	-11.9145	-11.7259	-15.3231	-8.94362	-11.9354
305.5	708.5	11.1368	4.5609	-5.55017	-12.6637	-5.7593	-7.43399	-5.81401	-6.30992	-8.37397	-12.2177	-5.47855	-8.91118	-7.57217	-10.0506	-6.40126	-8.60343	-12.3421	-9.86455	-9.53227	-9.3848	-7.96918	-11.4885	-10.7525	-9.50959	-10.3374	-7.70299	-13.921	-10.6931	-8.6831	-7.24535	-13.1003	-6.53078	-9.80029	-9.05704	-10.8282	-12.158	-8.65821	-8.70526	-7.0864	-10.9972	-7.62077	-12.7347	-10.309	-12.1468	-13.3856	-13.7996	-9.99082	-14.0939
306.5	708.5	11.1369	4.5609	-5.93784	-10.5311	-6.8079	-7.41687	-5.35246	-7.66083	-7.83552	-16.4172	-10.2742	-5.81971	-6.38067	-7.92959	-7.71952	-10.554	-12.7866	-9.9916	-13.2366	-9.0871	-9.91198	-11.6591	-12.2726	-8.71124	-11.6369	-10.8655	-13.7904	-11.1041	-6.77144	-8.3228	-12.5529	-4.94796	-9.15657	-9.40263	-11.3193	-12.4554	-8.0158	-8.54528	-6.88695	-11.8109	-8.32039	-11.0897	-10.0019	-14.4958	-12.9077	-12.6618	-10.2563	-12.9086
303.5	709.5	11.1366	4.56081	-9.4839	-12.9813	-8.71791	-9.00944	-5.7166	-8.45895	-9.82977	-9.98836	-5.22625	-8.80787	-9.57208	-10.0603	-7.55867	-9.69517	-11.1285	-8.27475	-7.01288	-10.0601	-8.75802	-10.9833	-9.36046	-9.89497	-9.19773	-8.02951	-8.03168	-7.79007	-6.89496	-11.3321	-7.13011	-7.16605	-5.1698	-10.8298	-10.0453	-9.35076	-6.36654	-7.12845	-7.82789	-5.71961	-8.25648	-14.3723	-9.47484	-15.7883	-11.0494	-11.3493	-8.24639	-9.82358
304.5	709.5	11.1367	4.56081	-8.0441	-16.2911	-9.10592	-6.49392	-7.2923	-6.72884	-9.84551	-11.4391	-5.96267	-8.89514	-8.03257	-11.4508	-7.44704	-7.14905	-10.5434	-8.11247	-8.48608	-10.0034	-7.90511	-10.4753	-7.85484	-10.4521	-8.56633	-7.94406	-10.3268	-6.62498	-9.9441	-10.2032	-9.49207	-7.19435	-5.47702	-11.1203	-10.2478	-11.2571	-8.11389	-7.6968	-5.78801	-6.97492	-7.74032	-11.7311	-9.23748	-13.6824	-11.7711	-13.004	-8.37211	-11.575
305.5	709.5	11.1368	4.56081	-5.47906	-11.9741	-8.64426	-7.13401	-9.72767	-8.53612	-10.5941	-13.1228	-7.39484	-8.89559	-7.44747	-12.3328	-8.81576	-9.2219	-10.4749	-8.19437	-10.7833	-9.42284	-7.8687	-10.4208	-8.81222	-10.0412	-10.5266	-8.71503	-14.2313	-9.31105	-8.19014	-8.75226	-10.6226	-8.14189	-8.85348	-9.77563	-9.43798	-12.769	-9.8406	-8.91069	-6.35168	-10.7298	-8.24203	-13.3138	-9.87038	-15.086	-11.7099	-12.2565	-8.78758	-12.5585
306.5	709.5	11.1369	4.56081	-7.0721	-11.0804	-9.50499	-8.91846	-10.6245	-9.77	-11.9903	-15.217	-10.3585	-6.24024	-7.77579	-11.7158	-8.94856	-11.9346	-9.45042	-9.08715	-11.7729	-9.3508	-8.80773	-11.1454	-11.0123	-9.30516	-11.7768	-10.5997	-14.5868	-10.5809	-6.78855	-7.67159	-10.1857	-7.46039	-9.5658	-9.59221	-9.78768	-12.3202	-9.24029	-9.03637	-6.93086	-11.94	-9.78768	-11.7749	-11.5986	-14.4901	-11.2265	-11.1929	-9.07367	-11.7001
307.5	709.5	11.1369	4.56081	-8.6404	-10.2938	-9.04063	-9.67511	-13.0032	-9.87236	-15.5508	-9.3072	-8.85142	-6.10648	-9.61173	-9.77519	-8.16308	-8.81565	-9.82742	-10.1376	-10.9753	-10.7101	-10.6017	-10.4475	-12.9598	-8.59224	-12.4107	-9.23122	-11.8192	-8.95745	-6.34776	-7.06412	-9.21222	-6.30681	-8.46899	-9.34246	-10.2553	-10.8951	-8.13393	-8.31421	-5.6043	-10.227	-8.03323	-10.0888	-12.6852	-12.7289	-10.8378	-11.4312	-9.58855	-10.3231
308.5	709.5	11.137	4.56081	-9.85644	-8.05978	-7.7774	-11.8071	-9.69406	-9.56358	-14.9437	-7.59317	-7.9486	-9.87799	-9.77721	-6.22602	-7.53491	-8.18445	-11.636	-11.4113	-10.0425	-12.418	-11.6441	-8.20506	-12.3584	-9.31221	-11.5941	-8.18785	-9.23936	-7.75876	-6.02315	-8.64462	-8.65619	-6.69804	-7.55582	-8.86982	-10.4163	-10.0754	-7.92458	-7.13246	-4.5002	-9.22928	-6.83508	-9.36511	-11.2367	-12.3189	-10.4455	-12.6574	-10.0466	-9.05857
303.5	710.5	11.1366	4.56072	-9.69577	-13.6816	-9.17259	-8.8531	-5.60717	-10.4515	-9.55463	-9.69988	-6.65665	-7.97926	-10.6558	-10.7902	-8.40219	-8.92601	-9.85324	-9.3114	-8.83818	-9.1594	-10.6374	-11.7292	-6.98039	-10.0476	-9.57472	-8.68073	-7.04022	-5.26566	-7.07869	-9.24038	-7.04978	-6.63274	-5.15447	-8.20078	-7.14305	-9.45004	-5.98885	-7.7213	-8.10406	-5.86141	-9.15755	-11.6832	-7.01557	-12.8738	-9.35927	-10.4146	-8.73245	-12.6018
304.5	710.5	11.1367	4.56072	-8.76235	-13.9194	-10.748	-6.54132	-8.07989	-8.89744	-12.1019	-9.89871	-8.36751	-7.87374	-8.22374	-12.1401	-9.27576	-7.64615	-8.37623	-9.37307	-10.3174	-10.3849	-9.44698	-9.9908	-6.40023	-11.3106	-8.16687	-8.78093	-8.86671	-5.57347	-9.55849	-8.47805	-8.50262	-7.32625	-5.78536	-8.14124	-7.82508	-9.85593	-8.05689	-7.49943	-6.77381	-7.30352	-8.61438	-10.0203	-7.61076	-12.1274	-8.28851	-10.4834	-9.56611	-12.3996
305.5	710.5	11.1368	4.56072	-6.67038	-11.8268	-9.81987	-7.77531	-11.2759	-11.769	-12.4409	-12.2815	-8.96587	-7.9387	-7.66378	-13.267	-12.4955	-9.82265	-7.10066	-9.57119	-11.2102	-11.0762	-8.94315	-9.58925	-7.87309	-11.3885	-8.97341	-9.10689	-11.173	-8.55987	-8.2388	-6.37761	-8.86703	-8.67872	-7.869	-9.56046	-9.29557	-9.08512	-9.54603	-8.1821	-7.56804	-10.7211	-9.49861	-10.5946	-8.16582	-11.8139	-7.99575	-11.1021	-10.2772	-11.0893
306.5	710.5	11.1369	4.56072	-8.29249	-11.8285	-7.9226	-10.1569	-12.4178	-11.322	-13.3725	-12.2188	-7.69575	-7.19354	-9.11565	-13.3437	-10.623	-11.6817	-6.34823	-9.57836	-12.3764	-10.5078	-9.53191	-10.6992	-10.4215	-9.88384	-9.33277	-10.6841	-11.1788	-11.002	-6.7448	-4.92298	-9.01923	-7.84804	-7.89104	-9.86202	-11.0583	-8.91142	-9.04107	-8.926	-8.15365	-13.7237	-9.69938	-10.3413	-7.92287	-11.6561	-8.00262	-11.498	-11.4317	-10.6675
307.5	710.5	11.1369	4.56072	-8.65081	-10.8252	-7.13951	-9.53208	-14.9733	-10.9178	-15.3048	-7.95092	-6.21242	-7.55386	-11.4683	-10.9536	-8.49907	-11.3251	-7.91795	-9.49143	-12.0614	-10.5178	-10.9833	-10.7387	-11.7588	-8.26291	-8.53611	-11.1748	-10.1254	-9.75621	-6.65999	-4.6635	-9.88397	-6.46242	-6.50613	-8.61739	-10.5507	-9.70893	-8.76796	-9.22574	-6.65874	-12.3953	-8.21037	-10.0071	-7.95136	-11.9782	-9.05014	-11.6691	-12.0737	-11.2083
308.5	710.5	11.137	4.56072	-10.3385	-9.45213	-7.42824	-9.51707	-13.7879	-10.0218	-13.4728	-7.10511	-6.20776	-9.104	-9.14487	-7.33911	-8.16851	-11.4563	-10.8951	-9.95936	-9.63793	-10.9803	-10.9129	-9.27229	-11.1667	-8.44992	-7.22913	-8.95109	-9.61562	-8.74344	-7.32763	-6.53015	-11.4482	-7.52166	-6.44349	-7.32798	-10.7308	-11.3526	-9.80874	-8.23866	-5.75124	-11.121	-8.08367	-9.82061	-9.69702	-12.7906	-10.4306	-12.9678	-8.87975	-9.71151
302.5	711.5	11.1365	4.56064	-7.11817	-13.2289	-10.0169	-9.53172	-7.22028	-9.57411	-6.98647	-10.3515	-8.55578	-6.80521	-10.4578	-9.32638	-10.5787	-9.97914	-8.85219	-12.3717	-10.4226	-9.77523	-14.4902	-14.2092	-8.62294	-9.80476	-11.3952	-8.73724	-7.87701	-6.19251	-7.01461	-7.63721	-8.77961	-8.05575	-11.2118	-9.13831	-6.78762	-8.29551	-7.40902	-8.56349	-9.03996	-8.0046	-9.96806	-11.5022	-9.29059	-11.6188	-10.7492	-10.5506	-10.4527	-14.2521
303.5	711.5	11.1366	4.56063	-11.5919	-13.67	-10.43	-9.95963	-6.36717	-9.59355	-9.55342	-10.6821	-9.26085	-7.3971	-9.12735	-10.6894	-8.70729	-7.23979	-8.25905	-12.8305	-10.6409	-8.86864	-13.3958	-11.5296	-7.01262	-10.1172	-9.8653	-8.55615	-7.65453	-4.81256	-6.3564	-7.90298	-8.86117	-7.69796	-8.79456	-8.12731	-5.68969	-7.68553	-6.81855	-7.69988	-4.92129	-5.83389	-9.71628	-9.72525	-8.39321	-10.5733	-9.54564	-9.48414	-10.6687	-16.7288
304.5	711.5	11.1367	4.56063	-10.6856	-11.2665	-10.8539	-8.77028	-7.81471	-9.33087	-13.224	-10.4654	-12.8019	-7.63797	-7.37559	-13.0692	-10.3455	-6.63372	-7.17407	-11.7594	-10.4174	-11.0222	-12.0096	-8.88315	-7.20849	-10.835	-8.60638	-9.07348	-8.30617	-5.45952	-6.47978	-7.22776	-7.97279	-8.23135	-9.42306	-8.95481	-6.80112	-6.41445	-7.41571	-7.69938	-4.50995	-7.15515	-11.2868	-8.51377	-8.40497	-9.38279	-7.92204	-9.60935	-11.4653	-13.5126
305.5	711.5	11.1368	4.56063	-7.66186	-11.2125	-8.4682	-10.4194	-9.59129	-12.963	-12.5863	-11.9265	-11.3456	-8.48385	-6.36198	-12.5164	-14.3041	-8.59865	-6.1059	-10.1974	-10.8034	-13.3881	-10.304	-8.28336	-9.22693	-9.59157	-8.75536	-9.76624	-8.39152	-8.03619	-6.45854	-5.41676	-7.08814	-7.53137	-8.18994	-10.6181	-9.41972	-6.09648	-7.64556	-8.20029	-6.59314	-9.86411	-11.8974	-8.83533	-7.77743	-8.57772	-6.71261	-10.2809	-12.4585	-11.0836
306.5	711.5	11.1369	4.56063	-6.91877	-10.3508	-6.00896	-12.1023	-9.19877	-10.1422	-11.6437	-10.1595	-8.54559	-9.19203	-6.71095	-10.228	-11.4928	-10.7891	-5.87599	-8.91488	-13.6638	-13.2258	-9.69036	-9.92533	-10.6987	-8.01552	-8.3728	-11.6901	-8.31915	-11.9759	-6.54551	-3.87567	-7.24689	-5.06942	-6.22323	-10.0942	-11.2113	-6.90858	-7.62243	-8.91463	-8.63943	-12.9805	-9.27723	-9.63986	-6.52063	-8.81471	-6.45418	-11.029	-14.0139	-10.7867
307.5	711.5	11.1369	4.56063	-5.62314	-9.528	-5.83497	-8.15106	-10.1267	-7.18333	-12.9858	-7.58319	-7.18346	-9.23102	-6.9844	-10.3058	-9.32011	-13.7461	-8.18624	-9.10232	-14.8358	-11.8565	-10.432	-12.1984	-10.042	-7.3222	-7.06509	-12.9027	-8.93079	-10.8132	-6.7614	-3.90998	-9.21496	-3.72137	-5.33909	-8.61163	-9.31195	-9.04579	-8.12679	-9.29356	-7.71709	-13.3093	-7.93628	-9.87379	-5.86704	-10.6877	-8.02026	-12.4028	-15.147	-12.2151
304.5	712.5	11.1367	4.56054	-11.1319	-9.22751	-11.6115	-11.5563	-9.51504	-6.51694	-14.5505	-13.217	-11.9745	-8.91029	-6.30812	-13.6424	-7.72263	-4.20017	-7.11306	-9.89994	-8.13783	-10.6892	-11.0632	-8.59969	-9.1197	-10.7214	-8.80167	-9.20003	-9.64031	-5.34494	-4.46782	-8.25239	-6.03514	-8.32568	-10.1717	-10.4367	-7.72185	-4.17599	-7.05495	-8.35531	-3.57247	-7.84652	-12.3524	-8.41312	-10.1398	-8.68595	-10.0485	-9.50197	-12.7345	-14.6363
305.5	712.5	11.1368	4.56054	-8.15946	-10.6854	-9.49088	-11.6694	-9.33343	-9.53992	-15.076	-11.6273	-12.322	-11.2849	-5.16243	-11.7089	-9.36411	-6.99105	-6.52153	-8.64996	-8.16927	-12.2708	-8.7244	-7.67133	-10.382	-8.46887	-8.51198	-10.8507	-9.56964	-6.88772	-4.57102	-7.3513	-5.11375	-5.54223	-7.16481	-10.3647	-11.0184	-5.1781	-6.58353	-8.58682	-5.30844	-9.71104	-11.3209	-8.70847	-9.12261	-7.89846	-7.43531	-9.391	-13.3802	-12.3295
306.5	712.5	11.1369	4.56054	-6.15083	-8.95842	-6.23304	-11.5906	-8.84874	-6.81919	-13.3236	-8.4976	-10.8172	-12.035	-5.42147	-11.5242	-10.4202	-10.0613	-7.09413	-8.95719	-12.3086	-13.0524	-9.07943	-10.1168	-9.6469	-6.44909	-8.08235	-11.7472	-9.76778	-9.36157	-6.29821	-5.86484	-5.29973	-2.84083	-5.61958	-9.47491	-12.0795	-7.1022	-6.75581	-9.14411	-7.88016	-10.1129	-9.27611	-9.26203	-7.89537	-7.64656	-6.61402	-9.60449	-15.0707	-10.7222
307.5	712.5	11.1369	4.56054	-5.03667	-8.13456	-5.68598	-9.05886	-8.80281	-5.26612	-12.168	-7.2199	-11.767	-10.7048	-5.47003	-12.9856	-8.98252	-11.8151	-9.84187	-9.0403	-14.4156	-12.399	-11.8246	-13.7844	-7.7414	-6.36583	-7.09945	-11.5975	-9.39154	-9.30324	-7.16298	-5.14242	-7.2821	-2.04196	-5.75548	-8.58738	-9.5954	-8.01436	-7.33864	-8.91338	-7.36556	-7.85496	-8.42562	-9.0204	-7.54152	-8.44228	-7.99824	-11.5285	-15.4075	-10.7728
307.5	713.5	11.1369	4.56045	-7.97348	-8.43637	-6.77055	-8.58417	-9.35991	-5.53814	-10.6827	-7.9041	-8.72525	-12.4644	-7.08266	-11.7052	-7.20322	-10.4118	-10.8676	-8.07373	-11.9249	-10.3259	-10.5051	-12.0634	-7.88422	-5.51997	-7.56968	-10.1723	-9.03451	-8.79789	-7.74859	-7.72113	-8.16101	-2.8963	-7.83812	-9.30286	-9.59968	-6.99322	-6.87347	-7.61745	-5.83936	-4.37498	-8.09647	-9.32436	-10.5416	-8.77995	-9.10146	-9.55491	-10.1192	-7.62428
276.5	749.5	11.1341	4.55726	-6.55317	-12.1289	-11.0436	-9.72953	-9.81002	-12.1707	-10.2988	-14.9104	-6.79265	-11.0306	-6.59827	-11.9487	-8.5092	-10.5148	-12.4092	-9.19093	-7.91648	-8.62699	-7.0612	-8.73046	-8.73228	-12.8413	-7.12948	-6.56643	-10.4826	-11.4292	-8.51897	-6.19667	-10.1522	-8.95557	-11.1828	-6.4695	-7.53123	-11.1298	-6.37999	-6.59638	-5.59049	-7.94777	-8.04923	-10.0707	-7.5734	-8.44464	-10.0095	-12.1105	-10.5915	-14.2022
275.5	750.5	11.134	4.55717	-8.01802	-11.3228	-9.59218	-11.2303	-6.97684	-10.7172	-9.03125	-9.48961	-8.65753	-10.4391	-9.68733	-10.5703	-6.94079	-9.51972	-11.6624	-7.93995	-9.33766	-4.58636	-9.09603	-6.8737	-7.92719	-7.90744	-5.95378	-6.05195	-9.00132	-12.3032	-7.34271	-9.97154	-10.9689	-12.9572	-10.0191	-7.99318	-9.01126	-10.8042	-8.69987	-10.1718	-8.05433	-13.0764	-10.0877	-10.2998	-10.4598	-12.1754	-9.78818	-11.211	-7.59773	-10.0508
276.5	750.5	11.1341	4.55717	-7.76373	-13.5872	-10.6908	-8.18389	-10.1883	-12.7607	-9.51966	-11.4711	-6.49471	-11.6278	-9.37913	-10.6012	-7.7524	-10.2952	-12.963	-9.3093	-8.67111	-5.93821	-8.59347	-8.46649	-8.52106	-11.2249	-6.78795	-8.21069	-9.97659	-12.4889	-8.47645	-9.35704	-10.8117	-10.4308	-11.8558	-5.45153	-7.30674	-10.7513	-5.39562	-9.4106	-5.73383	-9.43822	-8.21392	-8.46016	-9.93544	-8.85937	-9.4927	-11.4974	-6.60462	-9.82534
277.5	750.5	11.1342	4.55717	-7.73252	-12.0271	-9.84606	-6.58971	-10.4836	-11.4516	-10.5455	-12.4784	-4.76861	-11.585	-7.85883	-9.91339	-9.17018	-8.87345	-11.5091	-12.5477	-9.65124	-11.0807	-11.1337	-9.30703	-10.1095	-11.6708	-7.42238	-11.6628	-8.3678	-12.0144	-8.2496	-10.396	-9.30224	-7.78315	-11.5389	-5.04325	-5.23569	-8.68516	-5.0312	-9.99583	-4.97749	-6.95991	-8.31475	-7.51961	-9.0027	-8.72696	-8.91002	-7.9702	-7.71956	-8.50943
274.5	751.5	11.134	4.55708	-7.76295	-9.70791	-10.4274	-12.3879	-5.5825	-9.09767	-5.97632	-10.6839	-7.58122	-10.5327	-9.527	-11.7273	-10.6072	-7.21129	-10.8901	-8.71821	-6.81984	-6.36602	-14.678	-7.95122	-12.2103	-6.98012	-7.17748	-7.69626	-8.44972	-11.0468	-3.84719	-11.0324	-9.43094	-7.95681	-8.89303	-11.4158	-7.92232	-9.90343	-13.3884	-9.60892	-12.2463	-11.3006	-12.4227	-9.88399	-10.0471	-11.9264	-9.16801	-9.33994	-9.47348	-8.53513
275.5	751.5	11.134	4.55708	-6.59398	-11.8713	-10.242	-11.7779	-7.3012	-11.1018	-8.561	-8.64028	-8.42394	-9.80935	-10.3863	-9.27986	-9.79291	-7.47563	-11.5219	-10.4475	-9.19828	-4.06722	-12.3845	-9.36332	-10.7761	-7.26062	-8.7793	-7.13594	-9.33698	-11.7393	-6.99119	-11.093	-12.3017	-9.06482	-11.1096	-7.93729	-7.87241	-9.71637	-9.63295	-10.0704	-10.253	-13.0468	-10.4723	-8.92041	-11.1666	-13.4262	-9.53744	-10.9435	-5.62911	-7.66962
276.5	751.5	11.1341	4.55708	-6.69866	-13.6455	-9.94292	-8.21115	-9.84012	-14.2299	-10.5403	-9.33671	-8.34307	-11.9215	-10.3491	-10.3097	-7.82616	-9.63739	-13.7063	-11.4873	-10.8285	-5.51852	-11.596	-9.68039	-10.437	-9.72314	-10.2963	-9.44727	-10.0059	-11.879	-10.6136	-12.9705	-9.67147	-9.30629	-14.5867	-5.67674	-8.14849	-8.74706	-5.23331	-11.2665	-7.67775	-9.47824	-9.87195	-7.63933	-11.9386	-10.3421	-8.00554	-10.5309	-4.02617	-7.09182
277.5	751.5	11.1342	4.55708	-7.66601	-13.5837	-10.2878	-6.54469	-10.1194	-14.9244	-11.548	-10.6472	-6.97004	-11.5085	-10.3695	-11.4971	-8.07626	-9.10033	-12.3396	-14.3399	-13.4835	-10.3217	-13.605	-10.0789	-10.0562	-9.94344	-8.91989	-13.3199	-5.60636	-10.4272	-10.1494	-15.4602	-8.33686	-7.64828	-12.4477	-6.2737	-6.26846	-7.43706	-4.91769	-11.0115	-6.43505	-7.72336	-10.8838	-6.47161	-9.34491	-9.3634	-7.16199	-6.05025	-5.42513	-5.95286
278.5	751.5	11.1343	4.55708	-10.1491	-12.4841	-9.46285	-6.31819	-7.76783	-11.8294	-12.1469	-11.1211	-5.62396	-10.2317	-9.51599	-11.6366	-8.14683	-7.21733	-13.117	-12.2344	-9.64175	-13.1099	-11.6121	-10.9043	-10.6709	-10.7803	-9.01303	-13.373	-5.28613	-10.0925	-9.27653	-13.3832	-9.01024	-7.06548	-10.9648	-6.54254	-5.48596	-7.03106	-6.86683	-7.28443	-6.63051	-7.72454	-9.61354	-6.78224	-8.33419	-10.3664	-9.26994	-5.64993	-7.95422	-5.68668
273.5	752.5	11.1339	4.55699	-9.44534	-9.22535	-10.9375	-7.14973	-8.4288	-9.1438	-6.98874	-13.7752	-6.33898	-10.4523	-7.67804	-10.4954	-10.8889	-8.05239	-7.31247	-6.8526	-4.52242	-9.65987	-6.45081	-9.36906	-10.3205	-7.70157	-10.7486	-9.24636	-9.95261	-7.28407	-3.43163	-8.30727	-7.70118	-6.24374	-6.55078	-9.56865	-6.86875	-9.69143	-10.4055	-10.0844	-14.919	-9.17687	-12.9776	-8.74151	-8.20973	-12.8119	-8.00684	-10.1947	-9.07424	-10.0817
274.5	752.5	11.134	4.55699	-6.69014	-10.001	-10.8579	-11.4033	-7.70371	-11.7058	-7.91924	-14.5422	-7.09386	-10.7176	-8.89655	-12.0117	-13.1956	-7.60311	-8.65094	-8.86662	-7.23222	-8.08365	-11.9681	-12.3397	-12.211	-8.28674	-10.0003	-9.26743	-8.2105	-8.67108	-3.38365	-8.4695	-8.95992	-7.55133	-8.91998	-11.3046	-6.29726	-9.61204	-12.3212	-8.22837	-14.2528	-9.68559	-13.1428	-9.2225	-8.22429	-12.9112	-9.60012	-8.49053	-8.45182	-8.11008
275.5	752.5	11.134	4.55699	-5.92884	-11.6903	-10.1704	-11.2478	-7.03301	-13.774	-9.54756	-12.4291	-8.50786	-12.0556	-10.6907	-9.2927	-12.7971	-9.27506	-11.2954	-12.2636	-9.94202	-7.04383	-12.8766	-13.5356	-12.9202	-9.48917	-12.4919	-9.62977	-7.62164	-8.59175	-6.39471	-9.07526	-11.1481	-8.38279	-11.9975	-8.73225	-7.32213	-9.87795	-9.16561	-9.17618	-12.5652	-10.0276	-11.8464	-9.87988	-10.3317	-13.0016	-9.24854	-10.6865	-5.75741	-6.8778
276.5	752.5	11.1341	4.55699	-5.67219	-13.4331	-9.61169	-8.71584	-9.05875	-14.6812	-12.476	-10.2683	-8.66079	-12.827	-10.6257	-8.90413	-10.0222	-11.3352	-14.6145	-15.4652	-11.4487	-8.66309	-13.8038	-11.2176	-11.5303	-10.6663	-13.09	-11.963	-8.01813	-8.89135	-11.4193	-12.1796	-9.49471	-8.07022	-12.9939	-7.204	-9.00778	-9.57398	-5.8459	-10.1791	-10.7018	-8.50081	-11.0494	-9.20013	-9.00436	-11.3623	-7.94402	-10.33	-3.73032	-6.39316
277.5	752.5	11.1342	4.55699	-5.76619	-14.4836	-10.0312	-7.91247	-11.3523	-13.7676	-13.0054	-10.252	-7.71205	-11.5945	-9.95687	-10.295	-8.1934	-10.7247	-13.622	-15.1183	-11.9562	-11.2332	-16.0092	-11.7791	-9.87438	-8.92714	-10.3067	-11.9129	-5.42691	-8.52697	-14.3122	-14.5795	-9.32275	-7.54325	-11.9159	-8.40808	-9.17163	-9.11535	-6.22778	-7.98281	-8.71942	-8.18705	-9.76033	-8.30215	-6.9334	-9.59416	-6.75135	-7.65338	-4.50708	-5.767
278.5	752.5	11.1343	4.55699	-8.34872	-15.8398	-10.2352	-7.90325	-9.74606	-13.4549	-11.2477	-11.1793	-6.76114	-11.2294	-9.77455	-11.2866	-7.99761	-9.54828	-13.9069	-11.661	-11.053	-12.8634	-14.9168	-13.5993	-11.1235	-10.2813	-9.6742	-12.1571	-5.24583	-8.97403	-12.0448	-12.0193	-10.0483	-7.83176	-10.7336	-7.73823	-8.53562	-9.17147	-8.14936	-5.60033	-7.27403	-9.85287	-8.72683	-8.67882	-6.67789	-8.93694	-7.81616	-7.5632	-7.86456	-6.13438
279.5	752.5	11.1344	4.55699	-10.1459	-14.4709	-8.80223	-8.2615	-7.78638	-14.0405	-10.7286	-12.5491	-6.12542	-11.1195	-8.73666	-10.3936	-8.35348	-10.5568	-13.5032	-11.9943	-10.963	-12.998	-14.6417	-14.2629	-12.8019	-12.2903	-9.6082	-11.0609	-7.11229	-10.0913	-10.9453	-11.8359	-11.7773	-9.89591	-11.1022	-8.0173	-8.95789	-8.81418	-8.39519	-5.61677	-7.29387	-9.96105	-11.4576	-10.6378	-8.14107	-9.49439	-11.2383	-10.6665	-10.2676	-8.55575
280.5	752.5	11.1345	4.55699	-8.5651	-10.7606	-9.31434	-8.08557	-6.24516	-12.8439	-10.1574	-10.6554	-6.03196	-10.9281	-8.07145	-7.88513	-8.49535	-11.8417	-11.0418	-11.9168	-12.4521	-13.0779	-14.8772	-12.0955	-10.4703	-11.1671	-7.5863	-9.15958	-9.36391	-8.72102	-10.8852	-12.8618	-12.3094	-8.93977	-11.7111	-9.66105	-10.03	-8.9405	-7.80201	-7.76802	-9.60047	-9.4397	-14.9258	-10.9608	-10.3792	-10.0897	-14.316	-13.7031	-11.1653	-10.2676
273.5	753.5	11.1339	4.5569	-12.8025	-7.15726	-11.7094	-7.72572	-7.21309	-9.01382	-8.97157	-12.1185	-8.58419	-7.66009	-8.84136	-10.1458	-8.78091	-7.80019	-6.67671	-8.53369	-5.56261	-11.5006	-5.86181	-9.00598	-8.21983	-6.54888	-9.91582	-9.86324	-9.07	-8.71807	-4.12183	-7.16582	-6.52156	-6.3037	-5.75791	-8.09322	-6.93974	-10.4868	-9.29353	-10.8731	-10.9964	-6.19832	-9.40413	-9.40031	-6.38775	-13.5387	-8.61605	-10.1617	-9.02835	-8.63125
274.5	753.5	11.134	4.5569	-7.03547	-8.18941	-11.0471	-9.35784	-7.30368	-11.0219	-11.6259	-13.9286	-8.31094	-9.33804	-7.66523	-11.8418	-9.68947	-7.80126	-7.30143	-10.1095	-7.75959	-10.709	-8.81532	-12.1776	-11.7061	-9.13728	-10.5189	-11.3515	-7.70103	-7.52434	-4.67215	-6.89999	-8.39994	-7.25335	-7.981	-10.8997	-6.06955	-10.4727	-10.3015	-8.94365	-10.4473	-5.91256	-8.34836	-11.1451	-6.45438	-13.7601	-7.70007	-9.94161	-8.9727	-7.29302
275.5	753.5	11.134	4.5569	-5.81652	-10.854	-9.89017	-9.75939	-7.09708	-13.1035	-11.6603	-10.5523	-8.26543	-12.5671	-9.41168	-10.1916	-8.36832	-12.5618	-10.146	-12.9934	-9.81211	-11.5836	-11.3836	-12.9188	-11.8535	-11.6158	-11.2755	-12.184	-6.02808	-6.67878	-7.28104	-7.22445	-9.65696	-9.5891	-10.1189	-11.2927	-7.43075	-10.033	-9.25207	-10.0389	-11.3836	-7.02909	-8.49887	-12.5006	-8.32145	-11.8802	-7.84582	-10.8378	-7.37287	-6.72178
276.5	753.5	11.1341	4.5569	-5.59269	-13.4961	-9.6552	-8.31987	-9.43364	-14.7244	-13.4933	-10.2858	-7.86312	-11.9746	-10.4561	-8.65269	-9.49798	-11.5607	-12.5085	-15.7537	-10.6797	-12.2041	-14.2284	-11.5265	-9.66751	-11.1592	-11.012	-13.8632	-6.10398	-7.08078	-11.0576	-9.16929	-8.69324	-11.8741	-10.8631	-10.3766	-9.94513	-9.72142	-7.24168	-10.5046	-11.1879	-8.06096	-9.70918	-12.7365	-7.81264	-11.2801	-8.11999	-11.4991	-4.74516	-7.09069
277.5	753.5	11.1342	4.5569	-3.68045	-13.9357	-10.2905	-8.76236	-12.5094	-11.3358	-11.4259	-11.7197	-7.41906	-10.2102	-9.50445	-8.92583	-9.30899	-9.15862	-12.6863	-12.1798	-10.654	-13.5746	-16.7345	-11.4796	-8.52042	-10.0121	-10.0964	-12.8805	-6.48257	-7.86682	-15.5255	-10.8706	-8.71694	-10.8706	-12.0129	-10.8292	-11.8842	-9.57452	-7.53527	-7.54877	-9.81893	-8.42039	-9.28443	-12.7198	-6.88575	-9.76377	-7.43631	-11.4454	-4.35394	-7.21499
278.5	753.5	11.1343	4.5569	-5.99747	-14.4958	-9.99411	-9.61641	-8.87019	-10.1284	-8.77432	-12.5013	-7.23962	-10.5366	-9.15886	-9.66321	-8.92942	-9.91323	-13.8585	-10.1289	-10.9505	-14.069	-16.4705	-12.1409	-11.2838	-10.558	-9.33807	-11.8988	-7.36593	-8.16467	-14.5631	-10.0233	-10.2782	-10.0384	-12.5485	-9.66216	-11.8837	-9.36006	-9.07485	-5.5566	-8.90738	-8.69084	-8.80161	-12.8799	-7.69559	-8.31373	-7.44436	-11.1402	-7.50759	-8.88901
279.5	753.5	11.1344	4.5569	-6.73239	-14.9596	-9.49597	-8.47904	-5.69144	-10.4332	-9.35209	-14.209	-7.2447	-11.0186	-9.30248	-8.69336	-9.32947	-14.0171	-14.9238	-11.7497	-12.0263	-14.0027	-15.5217	-13.1	-14.0254	-10.4813	-9.87386	-10.4838	-9.37369	-8.40967	-12.5989	-10.1595	-11.7755	-10.3462	-12.3527	-8.7471	-11.5834	-9.44189	-8.76861	-5.98606	-9.27601	-9.41462	-10.2416	-11.7008	-10.0266	-8.58917	-10.2399	-10.714	-10.4312	-11.642
280.5	753.5	11.1345	4.5569	-6.30344	-14.1277	-9.65978	-7.64089	-5.21872	-10.3628	-9.79518	-13.764	-8.03349	-10.8763	-9.46183	-7.0807	-8.70369	-12.4677	-11.0985	-13.813	-12.4736	-14.1697	-15.3275	-13.6014	-10.2015	-11.0448	-9.99716	-9.31346	-12.0827	-8.77891	-10.59	-11.7471	-11.6685	-9.09421	-11.0795	-9.80172	-11.433	-9.94158	-9.03452	-8.15974	-10.1369	-9.34099	-11.3028	-10.4173	-11.0771	-9.54549	-12.8588	-12.3334	-10.0253	-11.56
281.5	753.5	11.1346	4.5569	-6.51227	-12.3392	-11.1533	-6.98155	-6.52267	-10.1239	-9.39954	-12.7982	-8.15078	-11.0357	-7.64411	-6.04332	-7.42818	-11.6936	-9.73538	-12.7808	-13	-12.0467	-14.1027	-11.6308	-10.7172	-12.2652	-10.1662	-9.6325	-12.3855	-8.62503	-11.1046	-13.3661	-10.8207	-8.92178	-8.26704	-12.131	-8.73764	-12.2628	-9.69479	-10.5573	-10.925	-9.95885	-11.7737	-9.90801	-10.7955	-8.33651	-10.6851	-12.999	-10.5284	-12.5012
273.5	754.5	11.1339	4.55681	-11.412	-7.21977	-11.9102	-10.0469	-6.0131	-8.3705	-8.20095	-9.23386	-9.80565	-6.94204	-7.49276	-10.0938	-8.35483	-7.99205	-6.53582	-10.2539	-6.41498	-11.63	-6.52905	-7.75098	-7.51483	-6.26452	-6.69515	-10.3429	-6.99236	-8.00245	-5.04214	-8.52128	-6.42272	-6.8171	-5.71534	-8.65414	-8.8642	-11.4677	-8.75353	-10.2032	-7.53265	-4.13424	-7.2542	-7.45165	-5.4065	-11.3467	-5.61642	-11.6358	-7.63163	-8.0228
274.5	754.5	11.134	4.55681	-7.27768	-7.95961	-12.6788	-11.309	-6.42413	-10.1288	-10.2193	-10.0862	-7.79577	-8.80407	-5.92899	-10.6179	-8.30515	-7.62223	-7.11318	-10.1558	-7.41937	-10.8106	-7.73635	-9.67431	-11.0807	-8.96123	-8.94791	-12.8878	-7.53475	-6.25406	-6.3513	-7.35812	-6.78443	-6.83632	-6.47025	-10.8213	-7.71635	-10.9479	-8.80976	-9.08535	-7.26521	-3.48507	-4.56587	-9.09449	-5.13546	-9.45597	-4.79976	-11.2737	-8.30441	-7.27897
275.5	754.5	11.134	4.55681	-5.1547	-10.0816	-11.3314	-10.8405	-8.38346	-10.3411	-11.1473	-8.06345	-6.71523	-12.1694	-7.15895	-10.7656	-6.65271	-10.7171	-8.75001	-12.2781	-9.11038	-11.0784	-9.4824	-11.6254	-11.0003	-11.2565	-10.5422	-12.2076	-6.20259	-5.71635	-7.79082	-6.70282	-6.91164	-8.12882	-7.63027	-13.1296	-8.78399	-9.75619	-10.5551	-9.94525	-9.75603	-5.39861	-4.3302	-10.4958	-6.47411	-8.5788	-5.64273	-9.24033	-8.39743	-8.37647
276.5	754.5	11.1341	4.55681	-5.51723	-12.8783	-10.6614	-7.78628	-11.1434	-11.5049	-11.6835	-9.27597	-6.52289	-10.0463	-8.50678	-8.71102	-7.12235	-10.7498	-10.225	-16.5698	-10.0205	-12.5472	-12.3989	-12.1223	-8.80173	-10.6343	-10.6396	-10.0851	-5.85719	-6.99231	-9.09565	-7.53055	-7.21681	-9.40666	-9.5464	-15.4114	-11.3483	-10.1739	-11.7136	-11.9235	-11.2216	-8.71269	-6.91753	-12.945	-7.74125	-10.1407	-7.43027	-8.79081	-5.48767	-9.09273
277.5	754.5	11.1342	4.55681	-3.81513	-13.9194	-10.811	-7.53111	-11.6352	-11.406	-9.29383	-12.885	-7.38573	-8.90836	-8.62579	-8.42116	-8.37829	-8.45696	-11.0764	-13.7131	-9.64101	-14.345	-14.8861	-10.9624	-7.90591	-9.98215	-9.5782	-10.4837	-7.27996	-9.35071	-12.9296	-9.92087	-8.16502	-9.91858	-12.7078	-14.7651	-14.2388	-11.5785	-9.87333	-10.1462	-10.0875	-10.4564	-10.665	-14.8177	-8.66369	-11.5359	-7.8029	-9.98522	-4.43578	-9.65342
278.5	754.5	11.1343	4.55681	-4.30078	-13.6478	-10.8584	-9.32	-7.48173	-9.80047	-7.84451	-14.6075	-8.62865	-9.91181	-9.23601	-8.09296	-9.35514	-8.74995	-13.5174	-11.3448	-9.77043	-13.5745	-14.3348	-10.079	-10.465	-10.2331	-8.82277	-12.1377	-10.3455	-10.0873	-13.2236	-10.0709	-9.79042	-10.5183	-14.2041	-11.1734	-15.0748	-13.091	-9.09022	-8.50855	-10.0334	-10.6781	-9.65136	-12.3896	-9.87927	-10.3229	-7.70516	-10.1695	-7.21509	-10.7765
279.5	754.5	11.1344	4.55681	-4.9631	-13.5157	-10.5791	-8.72411	-4.72188	-7.89999	-9.32383	-14.9269	-9.63715	-9.39257	-11.8817	-7.53211	-9.58014	-10.8862	-15.2142	-13.2934	-12.4785	-13.0143	-11.8835	-10.718	-13.5956	-10.1852	-10.0587	-11.4992	-12.8767	-8.92567	-11.2759	-10.6602	-11.8718	-9.36749	-12.6474	-9.3733	-12.7709	-12.0602	-9.28306	-8.09805	-10.074	-10.8257	-9.55098	-10.5037	-11.1117	-8.72474	-10.598	-9.76143	-9.60374	-10.238
280.5	754.5	11.1345	4.55681	-5.97873	-15.3292	-10.346	-8.13511	-4.72378	-7.51958	-10.6073	-15.2531	-9.65334	-8.8228	-11.3535	-6.99814	-7.88865	-11.9593	-10.7763	-14.333	-11.8679	-13.6837	-12.3159	-13.1679	-11.9494	-10.8388	-11.2156	-11.7959	-16.4784	-9.17598	-9.2941	-11.9461	-12.3798	-8.42716	-10.6043	-10.9804	-12.0593	-11.803	-10.249	-9.19284	-9.98867	-9.37697	-10.2804	-10.0541	-11.3337	-8.95478	-12.131	-11.3732	-7.67787	-10.8225
281.5	754.5	11.1346	4.55681	-7.26208	-15.2777	-10.602	-8.05704	-6.19028	-8.24842	-10.6505	-16.1747	-9.85051	-8.70917	-7.95444	-6.42719	-5.12927	-12.9136	-8.87659	-14.7444	-11.2978	-12.3366	-11.963	-14.3472	-11.4473	-13.1861	-10.9185	-12.7888	-15.397	-9.62727	-10.6168	-12.0747	-11.4408	-8.80316	-8.07101	-13.932	-11.6494	-12.0365	-9.62124	-10.8569	-10.8992	-10.7816	-10.7188	-10.8604	-10.1363	-9.70774	-11.2735	-12.7987	-7.66095	-12.3116
282.5	754.5	11.1347	4.55681	-6.91287	-13.0883	-11.5639	-8.87862	-8.83768	-10.4672	-10.707	-14.6241	-8.52598	-9.13276	-6.04526	-6.22753	-4.8446	-12.7327	-8.39405	-13.098	-16.1006	-10.6569	-11.9968	-12.491	-11.8499	-13.9752	-9.65062	-12.9371	-13.1233	-8.34805	-13.7892	-10.225	-11.2411	-10.2059	-7.52824	-11.2793	-10.7525	-10.0099	-7.05286	-10.4236	-10.197	-12.0408	-11.6839	-12.2227	-10.9762	-9.91885	-12.0211	-12.0244	-9.38979	-11.9898
274.5	755.5	11.134	4.55672	-7.40877	-8.08295	-11.423	-13.9574	-7.34501	-10.4809	-8.92431	-9.20374	-7.63568	-8.46323	-5.62061	-8.70275	-9.08358	-8.99917	-6.5434	-7.91399	-7.26667	-9.67496	-6.97613	-7.53234	-11.8216	-8.46145	-8.4414	-9.90214	-8.05116	-5.40443	-6.60344	-7.50967	-4.13942	-6.32344	-5.56767	-9.43525	-9.71696	-11.4483	-7.32983	-5.93411	-4.85778	-4.61372	-3.21485	-6.71321	-5.53368	-6.06607	-3.70109	-8.02699	-7.15083	-10.114
275.5	755.5	11.134	4.55672	-4.93229	-9.43907	-12.017	-14.7422	-9.74799	-10.0191	-9.86744	-9.42347	-6.05752	-11.066	-7.02814	-9.42442	-7.62721	-11.0441	-7.93221	-12.3264	-9.48679	-10.0662	-7.94181	-10.1736	-11.9178	-10.8409	-10.4476	-9.26188	-6.98704	-5.20023	-6.54608	-7.3093	-4.5416	-6.03886	-5.51258	-11.0269	-9.85248	-11.2173	-9.80645	-6.60215	-7.69461	-6.45325	-3.26866	-7.90346	-6.63943	-6.10355	-5.2306	-6.79214	-7.88702	-12.6777
276.5	755.5	11.1341	4.55672	-5.6415	-12.633	-10.7992	-9.39403	-11.3789	-9.55642	-10.8609	-9.92624	-5.38002	-9.94241	-7.58546	-8.92805	-6.67722	-11.5217	-8.26449	-17.5405	-11.1945	-11.5238	-9.97301	-12.253	-9.76412	-10.644	-10.2469	-8.72642	-6.7784	-7.5031	-6.09954	-8.32135	-7.10849	-6.42952	-7.39696	-12.6355	-11.2535	-11.535	-12.1959	-9.83882	-11.838	-9.41756	-6.93576	-10.0142	-6.96612	-8.6737	-8.28388	-6.91141	-5.28532	-9.47438
277.5	755.5	11.1342	4.55672	-5.52351	-13.2383	-11.1949	-8.37199	-9.96153	-9.90631	-10.9527	-12.213	-5.47687	-9.78796	-7.3202	-8.17675	-6.95261	-9.5094	-9.95972	-15.7558	-9.19403	-12.8184	-11.9576	-10.2404	-8.39462	-10.6017	-9.62113	-9.42338	-8.69395	-11.2627	-9.18466	-11.2974	-9.47525	-7.11646	-11.1782	-13.4511	-14.5816	-12.2913	-9.92869	-13.1609	-10.7988	-8.39773	-12.6267	-14.4968	-9.17696	-12.3125	-7.82787	-8.45494	-5.03517	-9.20677
278.5	755.5	11.1343	4.55672	-4.59954	-12.014	-12.3144	-9.43622	-7.45258	-8.55071	-10.595	-13.6443	-6.19571	-10.0968	-7.23737	-7.54097	-7.76274	-8.01303	-13.8114	-14.1304	-9.57011	-12.6543	-11.6545	-8.99	-8.95876	-11.0932	-9.08044	-11.138	-12.6238	-9.83248	-12.1642	-11.5451	-9.67732	-8.11675	-12.3713	-11.8601	-13.5097	-12.916	-8.39434	-11.4096	-10.7882	-8.22322	-9.63769	-15.1703	-10.0326	-13.1165	-8.20388	-9.51175	-8.14477	-9.66829
279.5	755.5	11.1344	4.55672	-5.4811	-11.2658	-11.3003	-10.0586	-5.56784	-6.37585	-10.6926	-12.6604	-7.71108	-9.48505	-7.97658	-7.34781	-8.56343	-7.94667	-13.769	-15.3678	-13.4459	-12.1996	-9.7901	-9.67899	-11.0146	-10.8582	-12.1837	-11.638	-11.7262	-9.91745	-10.6442	-13.0364	-10.7051	-7.57869	-11.0153	-9.93025	-10.5831	-12.1623	-9.76109	-10.2072	-9.67761	-11.036	-9.44211	-11.9952	-9.00071	-11.5667	-11.4056	-10.0714	-9.17286	-8.46061
280.5	755.5	11.1345	4.55672	-6.73078	-12.3992	-10.7326	-10.4299	-5.11469	-5.64103	-11.0969	-11.0309	-8.86721	-8.64274	-8.08463	-7.94909	-7.54668	-9.87172	-10.7085	-13.813	-11.1613	-13.7553	-9.68866	-11.2893	-12.9653	-11.3256	-9.57626	-12.8203	-12.7812	-10.39	-10.1087	-12.6965	-11.8233	-7.21877	-10.9982	-10.81	-10.548	-12.6966	-11.5003	-10.4651	-10.037	-9.32944	-10.3261	-10.5443	-10.8284	-10.9551	-12.052	-10.7912	-7.6421	-9.33032
281.5	755.5	11.1346	4.55672	-8.57782	-12.7095	-10.7137	-10.8045	-6.12941	-6.62601	-11.1525	-11.7558	-8.46396	-8.7016	-7.18517	-7.46663	-5.34141	-13.6816	-8.74491	-13.9511	-10.781	-13.3398	-9.63092	-13.1835	-12.3747	-13.2711	-7.42904	-11.7888	-15.1506	-9.39054	-11.3335	-12.7041	-11.298	-7.90126	-9.85219	-14.7467	-12.6354	-10.3405	-8.12213	-10.8527	-12.138	-10.2725	-10.8246	-11.1486	-9.38585	-11.2105	-11.3685	-12.782	-7.95125	-11.0584
275.5	756.5	11.134	4.55663	-6.60942	-9.35105	-11.0151	-12.6166	-9.76312	-12.298	-9.87347	-13.5151	-7.13165	-10.5445	-8.76252	-8.14568	-9.39676	-13.1319	-8.16118	-13.9428	-10.413	-10.9617	-7.47521	-9.10592	-10.7386	-10.7051	-10.0606	-6.37266	-7.47556	-5.39711	-5.36469	-8.78234	-4.66582	-5.40231	-4.9099	-8.93506	-6.97618	-12.2014	-8.15471	-4.14082	-6.38314	-9.3637	-4.75804	-7.61437	-7.91903	-6.20513	-6.42568	-7.82858	-6.09232	-10.8848
276.5	756.5	11.1341	4.55663	-7.09361	-12.3108	-10.4623	-11.6937	-10.8253	-10.3219	-11.4188	-11.8709	-5.89162	-10.5816	-6.93536	-8.75619	-7.44336	-13.3673	-7.365	-12.3189	-10.6005	-12.6605	-8.88651	-10.0937	-10.9961	-10.4225	-9.54755	-6.99847	-8.20988	-8.44373	-5.01984	-11.09	-8.84139	-5.52246	-6.22184	-9.14826	-8.08517	-11.1556	-10.1172	-8.33273	-10.7941	-8.90686	-8.67326	-8.51811	-6.2126	-8.79742	-7.60043	-7.18445	-5.80667	-6.81938
277.5	756.5	11.1342	4.55663	-7.32401	-12.2812	-10.8666	-10.5769	-9.67952	-9.48257	-11.8325	-12.1033	-4.9601	-9.71443	-6.74065	-8.95486	-6.91066	-10.2264	-8.30219	-10.5671	-7.9475	-12.9406	-10.9174	-8.82677	-9.37489	-11.244	-9.67347	-8.38004	-10.0979	-12.7854	-8.14837	-11.906	-10.37	-6.36485	-8.29952	-9.50381	-9.79742	-11.5956	-10.2364	-13.3856	-10.1469	-6.41071	-9.79442	-12.8474	-7.11616	-13.0836	-6.62668	-7.82899	-7.56001	-6.11816
278.5	756.5	11.1343	4.55663	-5.19034	-10.681	-11.9346	-11.5643	-7.79859	-7.51917	-10.177	-12.7945	-5.17173	-9.46634	-7.75186	-9.19863	-7.02799	-7.80675	-11.2351	-11.6657	-10.079	-12.894	-10.1724	-8.92495	-8.48964	-12.1384	-11.2311	-9.78108	-12.059	-11.0842	-11.7686	-11.8806	-9.5571	-7.35762	-11.1989	-10.186	-9.53737	-10.9082	-8.44278	-8.64658	-10.1382	-6.74573	-8.21965	-16.0752	-7.54565	-12.4466	-8.49512	-9.50735	-9.61896	-7.99557
279.5	756.5	11.1344	4.55663	-4.61376	-10.0923	-11.5624	-13.382	-6.56421	-5.8096	-9.78879	-11.6918	-6.86595	-9.11537	-7.18322	-8.55489	-7.65567	-7.33702	-11.4433	-12.8134	-12.9432	-12.148	-8.49662	-9.46918	-8.83178	-11.0101	-16.1592	-11.826	-8.48109	-9.80319	-11.8041	-12.6318	-9.722	-7.50929	-10.3404	-8.58689	-7.97372	-11.9837	-9.69087	-7.96757	-9.95577	-9.13267	-9.62321	-15.498	-8.90214	-11.7555	-9.87097	-9.90605	-9.23833	-10.3172
280.5	756.5	11.1345	4.55663	-4.59405	-9.53575	-11.3197	-14.3358	-6.07568	-5.35829	-9.14119	-10.3029	-8.04303	-8.88069	-6.64386	-8.2923	-7.21327	-9.77046	-10.8236	-12.4857	-11.7601	-14.1014	-8.35858	-9.84194	-11.2669	-10.8196	-7.74036	-12.1102	-8.83457	-10.0155	-11.4529	-11.878	-11.0164	-7.58847	-11.4458	-8.86872	-9.01129	-12.1779	-9.91964	-10.1083	-10.7305	-8.8198	-9.31936	-11.2132	-11.5156	-13.3315	-11.6829	-10.2066	-9.18624	-10.6415
276.5	757.5	11.1341	4.55654	-9.03391	-12.8187	-11.388	-10.5719	-10.628	-11.3622	-12.0627	-11.484	-7.97956	-10.23	-6.9145	-7.85891	-8.52107	-12.4494	-7.42062	-9.21101	-10.0212	-12.7698	-7.51166	-8.61656	-10.7392	-9.41971	-8.57134	-6.37638	-9.68764	-10.2786	-5.97939	-9.5555	-9.61581	-5.38882	-6.14251	-7.14931	-6.11965	-11.3205	-7.28358	-8.96882	-9.37151	-8.70712	-8.43431	-8.11174	-5.81649	-10.0367	-3.95133	-6.29476	-8.31224	-5.26415
277.5	757.5	11.1342	4.55654	-8.45631	-12.7075	-10.6019	-9.99161	-10.5976	-10.7573	-10.5809	-12.4345	-6.59524	-8.35037	-7.23879	-7.73553	-6.37892	-10.5828	-7.30189	-8.26707	-8.69962	-11.669	-10.347	-8.99394	-10.2725	-11.7473	-10.454	-7.54843	-10.7803	-12.0896	-8.57382	-8.49962	-9.7784	-7.62727	-6.95659	-7.28237	-5.81853	-11.9453	-9.78751	-9.79855	-7.12562	-6.72449	-6.74572	-10.6216	-4.4996	-11.8382	-5.03086	-6.43306	-11.2357	-4.87763
278.5	757.5	11.1343	4.55654	-6.41088	-11.1919	-10.8676	-10.6896	-9.2692	-8.58591	-8.94282	-12.9404	-6.58816	-7.7021	-8.58782	-9.00168	-5.82979	-8.44993	-7.9518	-9.15095	-10.3918	-10.1765	-9.8464	-9.97159	-9.43961	-9.91371	-13.7669	-10.0612	-8.73618	-10.7717	-11.2804	-9.29046	-10.4469	-9.22358	-11.067	-6.75234	-6.35406	-11.6881	-9.4802	-6.03336	-7.6083	-7.46493	-7.35499	-13.935	-5.21607	-10.3088	-7.52048	-9.0545	-10.4393	-6.96161
279.5	757.5	11.1344	4.55654	-3.30113	-9.73268	-10.6774	-12.0826	-7.97509	-6.8423	-8.71182	-11.6234	-7.88468	-7.922	-9.19959	-8.55899	-6.48173	-8.11196	-9.12085	-10.2791	-12.435	-10.6067	-8.6528	-10.3753	-9.21876	-9.28245	-14.0321	-13.1267	-6.70755	-9.28121	-11.5409	-11.1646	-10.4485	-9.86862	-11.2721	-6.39894	-6.9834	-12.1054	-9.17196	-5.47624	-9.33722	-8.99656	-8.91141	-13.4259	-8.55803	-9.74833	-8.81826	-10.288	-9.37741	-11.4534
278.5	758.5	11.1343	4.55645	-9.1065	-12.0691	-11.4511	-10.6585	-11.3621	-9.59225	-11.1382	-13.0088	-9.02168	-8.21802	-8.82603	-8.13009	-4.78839	-8.03546	-7.54704	-10.2047	-9.94186	-8.87506	-11.5803	-12.0953	-11.1219	-8.90601	-12.2495	-11.1543	-7.16871	-7.86934	-8.70929	-7.23655	-10.4893	-10.9332	-11.4423	-6.119	-4.55872	-11.7257	-8.84169	-5.01075	-6.66777	-8.84153	-8.07156	-13.4019	-4.06051	-10.5557	-7.12077	-7.41789	-10.9253	-7.57411
542.5	403.5	11.1582	4.58797	-10.0651	-10.8149	-8.33588	-7.31851	-5.95045	-7.54565	-9.1636	-12.6567	-8.32181	-9.29979	-6.94348	-9.96314	-6.7097	-8.75538	-9.57258	-5.03382	-9.65716	-8.33873	-9.73555	-9.10078	-9.23283	-13.0361	-9.85538	-10.8543	-12.8918	-11.6058	-5.90288	-14.1851	-13.3088	-10.1383	-10.3446	-9.45363	-10.1534	-9.76209	-9.09539	-11.2687	-11.2325	-7.71226	-9.84576	-11.8081	-14.2512	-8.88069	-11.9643	-15.5545	-11.2879	-12.4468
543.5	403.5	11.1583	4.58797	-8.75161	-12.3579	-6.55693	-8.0702	-5.25223	-7.3981	-8.38965	-12.732	-6.01695	-11.1721	-6.59575	-10.3411	-8.47799	-7.96551	-8.97258	-8.21518	-8.58669	-11.0917	-10.0003	-12.5068	-7.57362	-15.2792	-11.2696	-12.4094	-11.0259	-7.70241	-4.28871	-14.6817	-10.6157	-10.1376	-12.057	-11.0133	-12.9664	-9.36988	-7.08912	-8.99579	-8.80467	-7.23947	-12.0498	-10.4527	-13.1415	-10.5297	-9.8872	-11.4656	-11.5155	-10.1814
542.5	404.5	11.1582	4.58788	-8.7966	-11.334	-9.55167	-8.7244	-7.95328	-9.33095	-9.38221	-8.77299	-8.04884	-12.6641	-8.77845	-7.78204	-8.65794	-8.31058	-9.57054	-5.53809	-10.3964	-9.68145	-7.98297	-8.73945	-9.05768	-10.2172	-9.90103	-9.51387	-9.81632	-10.1825	-8.66704	-15.5537	-11.7894	-8.52375	-7.96647	-9.06998	-6.97721	-9.14618	-8.14216	-8.5168	-10.3495	-5.32692	-11.5417	-10.7872	-10.8742	-10.4292	-12.3163	-15.4231	-13.6524	-13.2749
543.5	404.5	11.1583	4.58788	-7.56778	-13.2727	-7.67726	-9.2895	-7.64353	-9.60582	-9.57812	-9.51038	-4.98658	-12.9538	-7.68349	-8.23297	-9.93554	-7.92095	-7.49467	-7.07012	-7.52489	-13.1288	-9.72735	-10.8253	-9.70713	-10.5746	-8.86869	-11.1189	-10.7294	-6.19221	-5.8143	-14.8142	-11.9856	-8.96522	-9.42773	-10.2888	-10.1443	-11.0186	-5.2709	-6.68472	-7.37737	-5.23704	-13.8577	-9.95664	-12.97	-9.74867	-11.8456	-14.7542	-12.4309	-11.3306
544.5	404.5	11.1584	4.58788	-7.35284	-12.6993	-6.90234	-7.77043	-8.02684	-9.55281	-11.8493	-11.4836	-3.42426	-13.0084	-7.97398	-9.5829	-12.1359	-7.67404	-8.00471	-10.5103	-5.56898	-12.0662	-10.8044	-12.9162	-11.2832	-9.70691	-7.70165	-11.7779	-12.716	-6.83637	-5.54872	-13.3687	-9.36795	-7.77537	-9.9415	-8.91598	-8.84799	-11.9262	-6.3461	-6.75136	-6.38256	-6.6006	-12.0896	-8.65782	-13.8748	-9.34741	-11.2886	-10.7418	-12.2655	-9.29624
545.5	404.5	11.1585	4.58788	-9.22136	-11.1778	-6.36781	-7.97835	-7.97386	-9.23888	-12.7655	-12.188	-4.01641	-12.5339	-9.1243	-7.75395	-13.7042	-7.27668	-9.28901	-11.0122	-6.03554	-10.9272	-10.8139	-12.7677	-11.8509	-8.43316	-9.34366	-11.3043	-10.6821	-8.9506	-5.60346	-11.5088	-9.03587	-10.0322	-10.2456	-8.74019	-7.54645	-11.8832	-7.70634	-9.12999	-7.47145	-9.39782	-9.45882	-8.00898	-13.9104	-10.0754	-10.9825	-12.822	-11.998	-9.28876
542.5	405.5	11.1582	4.58779	-6.94533	-9.88399	-11.2592	-10.304	-9.47385	-9.009	-9.35162	-6.11781	-8.9774	-12.1106	-7.44391	-7.65072	-10.3741	-8.99424	-11.2834	-7.5826	-8.50897	-10.9534	-9.29255	-9.26382	-8.12768	-7.90915	-9.74515	-8.60193	-7.19128	-9.17768	-13.7179	-13.3383	-9.0825	-9.74693	-7.11938	-8.95792	-4.71373	-9.0691	-7.42461	-7.00601	-8.90652	-6.25163	-12.0701	-10.0596	-6.30556	-11.5084	-10.2636	-12.5975	-11.4428	-14.0872
543.5	405.5	11.1583	4.58779	-6.50769	-10.7001	-9.41832	-10.5608	-10.0988	-9.24629	-11.0153	-6.45533	-6.36842	-11.2053	-6.80926	-7.39625	-12.774	-8.35545	-7.86496	-7.95531	-6.79196	-13.161	-8.98374	-10.2015	-9.95145	-6.3216	-6.90613	-8.93514	-7.86885	-5.95197	-8.38645	-13.0419	-9.5722	-9.29997	-8.57847	-9.90017	-8.50344	-11.0209	-5.54934	-5.38908	-8.14918	-5.69028	-12.7354	-9.47563	-11.1853	-10.2059	-11.274	-12.9576	-10.4852	-13.8929
544.5	405.5	11.1584	4.58779	-8.19793	-11.5429	-9.32325	-9.8522	-10.5029	-10.1472	-14.0517	-8.89146	-4.4447	-11.2887	-6.81635	-8.72673	-14.8582	-8.81355	-6.99905	-9.39973	-4.91322	-11.5821	-10.0691	-12.0205	-11.3663	-7.65318	-5.84254	-7.94186	-10.8103	-6.19884	-5.54648	-11.2365	-10.1173	-9.3147	-10.8989	-8.84355	-8.52155	-10.2656	-6.35404	-5.14206	-7.72967	-6.67692	-12.246	-9.89549	-11.5021	-9.41493	-11.4421	-10.489	-11.0253	-9.71664
545.5	405.5	11.1585	4.58779	-10.472	-10.6769	-8.33904	-9.27602	-9.91336	-10.1071	-15.3565	-11.135	-3.62781	-12.2312	-7.95561	-9.68014	-13.9858	-8.48831	-7.57691	-8.52029	-4.82233	-11.5572	-8.68445	-12.2624	-11.2886	-9.13121	-7.90056	-9.3409	-10.8842	-7.11881	-4.54057	-9.82581	-8.85511	-10.9163	-11.4789	-9.12913	-7.53859	-7.30359	-7.94083	-9.35785	-9.1345	-8.55548	-12.7943	-10.7629	-11.9867	-9.94321	-11.4615	-11.2588	-12.017	-9.61086
546.5	405.5	11.1586	4.58779	-9.52166	-10.3813	-8.81611	-10.5357	-9.15614	-9.13088	-11.812	-11.5896	-5.35998	-11.3524	-10.3454	-7.73826	-10.1905	-8.11998	-7.16278	-7.06377	-7.02431	-8.91001	-6.41425	-13.0077	-11.0993	-8.69127	-12.0009	-11.2075	-14.0295	-8.26699	-3.79857	-9.10664	-7.78008	-11.6167	-11.301	-10.2952	-9.17673	-8.17622	-9.21042	-7.84544	-7.02478	-10.0518	-14.5624	-11.1851	-17.7301	-11.9127	-12.7196	-12.9178	-11.0193	-9.62217
542.5	406.5	11.1582	4.5877	-6.46111	-9.8321	-12.1501	-10.1426	-10.0154	-9.31398	-8.56684	-6.55239	-7.11918	-11.3104	-6.76525	-10.1032	-10.2003	-9.08267	-14.0261	-7.94722	-8.50812	-10.0474	-14.3475	-10.7167	-8.46996	-7.83676	-9.50399	-9.26296	-6.48323	-8.53429	-12.7704	-11.715	-8.97982	-12.654	-8.25563	-10.5055	-6.00013	-9.55816	-6.68331	-5.74743	-6.8326	-6.40809	-9.1982	-10.7823	-5.17218	-10.3389	-9.22296	-10.0873	-10.4084	-14.4052
543.5	406.5	11.1583	4.5877	-7.12646	-10.4614	-11.7636	-11.0394	-10.8086	-8.91753	-12.2024	-6.92013	-8.14197	-10.1702	-6.98248	-9.29577	-11.0067	-8.51047	-9.97332	-8.50436	-7.4501	-10.1162	-10.5571	-10.5766	-9.67363	-5.64549	-6.86159	-8.19796	-6.60188	-7.76217	-10.3228	-11.7349	-7.81642	-10.0628	-9.40173	-10.7832	-8.23613	-12.0468	-6.4516	-5.73665	-6.26282	-7.37993	-10.4665	-9.8413	-9.37952	-9.83145	-11.7591	-11.8356	-8.53636	-12.0152
544.5	406.5	11.1584	4.5877	-9.20537	-10.8277	-11.3688	-11.5542	-9.97095	-9.62645	-13.1104	-8.77666	-6.85219	-10.0664	-6.80179	-9.46255	-10.1255	-9.69028	-7.24261	-9.6432	-6.15931	-9.09167	-10.7012	-11.8971	-10.0616	-6.64009	-5.88735	-6.69016	-8.5278	-7.49083	-6.2472	-10.4684	-9.13093	-8.36343	-13.5	-7.87003	-9.41148	-8.72184	-5.98298	-5.19771	-6.33094	-8.01114	-10.82	-10.877	-10.8056	-9.64761	-13.4719	-9.48458	-9.31091	-8.70913
545.5	406.5	11.1585	4.5877	-7.68742	-9.81334	-10.0598	-10.682	-9.69375	-10.3223	-12.6227	-10.1484	-5.36287	-10.2133	-8.64967	-10.0056	-10.2021	-10.4968	-6.96595	-8.26225	-5.90707	-9.17582	-9.41092	-12.1372	-9.40879	-8.71195	-6.61215	-8.56812	-10.8503	-6.69486	-4.77025	-9.21458	-8.57565	-8.62147	-12.5711	-10.0193	-8.29175	-7.04738	-6.84897	-8.15074	-8.64823	-9.58698	-13.0637	-11.6145	-10.1189	-10.7076	-12.1852	-9.40021	-12.8223	-10.3003
546.5	406.5	11.1586	4.5877	-4.80539	-9.42636	-10.4919	-9.99752	-9.45527	-9.14253	-9.25695	-10.6992	-4.78227	-9.54253	-12.6619	-10.7497	-8.9266	-9.47574	-6.02843	-7.60103	-7.60842	-6.43962	-6.94605	-12.9836	-9.15584	-9.42786	-8.59925	-11.05	-12.6774	-6.82023	-4.20487	-9.9367	-8.41162	-8.78543	-9.57169	-13.4025	-9.24693	-8.56394	-8.07305	-9.32558	-8.74668	-10.5966	-13.6022	-11.4355	-12.9	-12.3905	-12.2682	-10.7539	-14.1801	-11.451
542.5	407.5	11.1582	4.58761	-9.29731	-10.9334	-10.4198	-9.87922	-12.2211	-11.2769	-8.4877	-9.39682	-7.30152	-10.655	-7.23859	-10.9462	-9.9436	-7.31982	-15.0041	-8.08634	-11.5197	-11.9421	-12.9903	-12.9876	-10.1583	-11.3106	-11.542	-11.3767	-7.25942	-7.5204	-9.9553	-10.2079	-9.90714	-11.9754	-10.1466	-11.2934	-9.63424	-11.5501	-7.29886	-8.46704	-6.14589	-6.0028	-8.08052	-10.2813	-6.60046	-10.0699	-9.7918	-8.48575	-9.87729	-16.1334
543.5	407.5	11.1583	4.58761	-9.29723	-12.1973	-10.7705	-11.0451	-11.6588	-10.6093	-11.2259	-8.68626	-9.53915	-11.0637	-8.55037	-9.95349	-9.65502	-7.95355	-11.0716	-8.82692	-10.0939	-9.64004	-11.636	-12.691	-10.3399	-8.0043	-8.45132	-9.43486	-7.49353	-10.1498	-11.8247	-10.4781	-9.34472	-11.3621	-11.2908	-11.9202	-9.14822	-11.6061	-8.09664	-8.32779	-5.19233	-7.76017	-9.84382	-10.581	-7.26641	-9.21204	-14.5694	-12.1779	-9.91034	-10.4764
544.5	407.5	11.1584	4.58761	-10.3193	-10.5643	-11.2938	-11.7784	-9.51985	-9.21327	-11.4028	-9.81178	-9.17018	-10.3927	-8.30728	-9.56361	-8.63526	-9.91537	-9.09921	-10.1291	-8.87291	-8.65997	-12.139	-12.558	-9.94563	-7.62681	-6.88308	-7.35203	-7.94423	-10.4471	-8.42234	-10.4871	-9.13649	-8.07841	-10.5848	-8.55816	-9.59186	-9.14506	-6.33779	-7.3013	-4.58181	-8.26424	-9.31356	-10.1568	-11.1719	-8.80265	-12.9952	-9.23303	-10.2038	-8.03362
545.5	407.5	11.1585	4.58761	-8.61176	-8.94932	-9.8872	-10.3649	-9.05153	-8.68528	-9.43688	-10.9177	-8.00505	-9.0612	-9.45222	-10.2601	-9.25788	-11.5867	-7.46885	-8.88928	-8.23996	-8.97849	-10.9608	-12.0456	-8.43159	-8.52179	-5.79024	-9.09068	-10.1826	-7.55146	-6.72306	-9.57826	-7.80138	-7.32085	-10.1614	-8.83001	-8.41532	-8.99056	-5.29227	-9.23396	-6.98354	-9.95455	-9.86111	-10.1702	-11.4476	-10.3417	-12.0194	-9.17253	-13.5923	-10.9657
546.5	407.5	11.1586	4.58761	-4.91383	-9.50218	-10.694	-8.94655	-9.16799	-8.23389	-7.472	-10.4842	-6.38707	-7.65991	-12.4137	-11.8493	-9.68455	-10.7431	-6.36604	-8.77167	-9.07108	-6.95914	-8.12787	-12.8987	-8.03741	-9.01087	-6.08376	-11.4413	-11.135	-6.23654	-4.82188	-11.061	-7.83673	-6.9506	-8.81718	-11.294	-9.65205	-10.6244	-5.17561	-10.0642	-9.61516	-11.1135	-11.8725	-10.2495	-12.3333	-13.2823	-11.4922	-11.307	-16.2493	-11.8601
542.5	408.5	11.1582	4.58752	-10.5136	-11.1805	-8.84839	-10.2038	-10.1537	-13.1082	-10.7541	-12.3453	-9.58823	-8.29856	-9.54615	-10.6348	-10.5785	-6.48834	-12.3903	-9.28188	-11.3454	-12.1174	-10.249	-14.1812	-13.1684	-12.5281	-12.7098	-14.4284	-8.11913	-7.92882	-8.58706	-10.2994	-10.7559	-12.0738	-11.0688	-11.8362	-9.75701	-9.24378	-9.11699	-9.45886	-7.05617	-7.00985	-7.62502	-8.11641	-10.037	-12.7319	-9.07071	-9.14032	-9.58415	-15.7118
543.5	408.5	11.1583	4.58752	-9.64354	-11.8296	-7.99948	-10.2945	-8.5447	-12.7516	-12.1001	-9.32077	-10.6172	-7.52435	-11.2481	-8.31005	-11.123	-7.58555	-10.1282	-10.0218	-13.3444	-10.7889	-10.158	-13.0388	-12.064	-10.8336	-9.94954	-10.7068	-9.10184	-10.1069	-11.2773	-9.99926	-12.1041	-13.1624	-13.8689	-14.3037	-9.73869	-11.0323	-10.0768	-13.6213	-6.21285	-9.18399	-11.2814	-9.97387	-8.21762	-11.0869	-14.1756	-13.5526	-8.29624	-9.78525
544.5	408.5	11.1584	4.58752	-9.79237	-9.40431	-10.0292	-10.0234	-8.53986	-8.87365	-11.2521	-8.82807	-10.0116	-8.77282	-9.78995	-8.0241	-10.0407	-9.34911	-10.2922	-9.67432	-11.3567	-10.7879	-11.2501	-12.556	-10.5508	-9.4771	-8.18674	-8.81975	-9.5274	-11.2076	-11.9883	-11.5628	-10.7385	-9.38781	-10.3339	-12.1213	-11.0684	-10.2746	-7.27167	-10.8642	-5.81157	-8.96887	-9.75382	-10.2963	-10.7305	-8.59099	-11.2624	-10.3083	-10.5592	-7.01186
545.5	408.5	11.1585	4.58752	-9.77263	-7.91266	-10.6232	-9.17987	-9.21059	-6.76364	-8.29508	-12.5384	-9.78471	-9.15821	-9.53522	-9.3726	-9.78124	-10.4372	-9.0625	-8.50787	-9.15138	-11.1962	-12.3611	-12.0676	-8.71124	-9.45883	-7.26069	-11.5125	-8.97539	-8.59344	-8.90369	-10.1426	-7.86485	-7.32896	-10.104	-9.99728	-10.2993	-12.4628	-5.50735	-7.92419	-8.33002	-7.26298	-8.32846	-10.7098	-13.2339	-8.76872	-11.4004	-9.86669	-13.0084	-10.3665
545.5	409.5	11.1585	4.58743	-7.48963	-6.97053	-10.5604	-8.40876	-8.33245	-6.11667	-9.02516	-11.32	-9.17331	-8.32739	-7.16565	-9.78911	-9.40862	-9.03013	-10.7103	-7.52409	-8.26486	-12.6382	-10.5179	-11.2735	-8.99146	-10.9758	-9.53053	-12.3072	-10.5316	-9.65654	-9.34741	-10.0794	-9.53843	-6.73842	-13.4885	-11.3666	-12.4582	-11.5268	-5.83934	-7.78322	-9.30432	-7.46468	-9.28174	-11.0362	-13.8439	-10.0731	-13.3709	-10.4739	-8.79413	-8.88509
562.5	427.5	11.16	4.5858	-8.75192	-10.9959	-8.89676	-9.86021	-8.35651	-11.2737	-8.73834	-11.4383	-11.9481	-8.49716	-7.49458	-10.9963	-11.5259	-13.6277	-10.7597	-8.14088	-8.90799	-6.89855	-8.31982	-6.53146	-6.4452	-10.9443	-7.35468	-8.32578	-7.20493	-6.72113	-5.63865	-7.32191	-6.72651	-4.22592	-5.13454	-6.86015	-7.97007	-8.78065	-5.36677	-5.50442	-7.53177	-4.92735	-7.89813	-6.35382	-7.36597	-7.62639	-6.08584	-5.71477	-8.78785	-10.2022
563.5	427.5	11.1601	4.5858	-7.19678	-13.359	-10.6057	-9.02862	-8.74885	-14.1934	-11.3117	-12.9585	-11.9798	-9.30019	-6.12966	-11.8416	-9.14432	-11.6591	-10.9026	-10.141	-10.7527	-4.8739	-10.1259	-8.40084	-8.82705	-11.8538	-8.18469	-10.5693	-8.87238	-4.85469	-7.77571	-8.2111	-5.04997	-4.47086	-4.74912	-5.8986	-6.72285	-10.4409	-5.21691	-1.37353	-5.97139	-2.47909	-5.97361	-4.2826	-5.54041	-5.66393	-4.59868	-3.4715	-8.43565	-9.10451
561.5	428.5	11.1599	4.58571	-8.77752	-11.4278	-10.2686	-14.1742	-10.2563	-8.6948	-7.74894	-11.0961	-11.9429	-12.5041	-10.426	-9.08785	-10.7376	-11.1094	-8.26218	-7.94215	-10.664	-13.5646	-10.7783	-8.74176	-7.37209	-10.1886	-9.74265	-9.78724	-9.95044	-8.3894	-5.61372	-7.08139	-5.53988	-8.07725	-7.90373	-7.68848	-8.45553	-7.05905	-6.32982	-9.29712	-12.1049	-10.1	-6.43802	-7.15573	-9.84778	-11.1072	-10.4575	-10.6534	-10.4584	-10.7527
562.5	428.5	11.16	4.58571	-7.60813	-9.87622	-10.8286	-13.9968	-11.3307	-9.9971	-9.25387	-11.441	-11.5962	-11.2891	-9.0366	-9.54546	-10.3097	-11.7051	-10.2528	-8.85478	-10.2883	-8.57333	-11.7169	-7.63571	-7.20255	-12.5324	-8.59803	-8.83969	-7.9044	-7.50801	-5.38147	-8.9062	-4.84906	-5.14324	-6.86063	-6.68342	-5.90556	-7.23792	-5.6964	-5.45184	-8.98469	-6.04342	-7.11774	-4.52039	-6.40069	-7.41248	-6.73463	-6.45051	-8.02072	-9.62365
563.5	428.5	11.1601	4.58571	-7.99044	-12.6981	-12.2167	-11.1155	-10.8425	-13.9635	-11.2782	-12.8212	-9.50893	-11.722	-7.50775	-12.1216	-9.80641	-9.23739	-11.6485	-10.3501	-12.3581	-6.46353	-13.2661	-11.2224	-9.27142	-12.6509	-8.56326	-11.6761	-9.9452	-5.11225	-8.65803	-11.0148	-5.60102	-5.91169	-5.79753	-6.796	-5.65477	-10.0475	-5.85	-1.70098	-5.89686	-2.75921	-5.8831	-2.54393	-5.67372	-5.67721	-5.85254	-4.1819	-9.32232	-8.20486
564.5	428.5	11.1602	4.58571	-9.61703	-12.6096	-10.9607	-9.12317	-11.7062	-13.6864	-12.815	-14.3158	-7.49257	-12.2132	-5.78044	-10.9119	-8.54242	-7.96725	-11.9277	-12.7261	-15.582	-7.06179	-13.3489	-11.8462	-11.9702	-11.7111	-10.2208	-17.2004	-8.05817	-1.84922	-11.7161	-11.545	-4.88482	-9.25364	-5.78824	-6.3228	-4.94328	-8.01822	-5.36497	-0.910856	-4.82786	-2.06319	-5.29572	-2.89314	-5.68573	-5.74028	-6.93368	-3.21827	-10.6652	-8.97919
560.5	429.5	11.1598	4.58562	-10.5908	-12.6458	-13.4331	-15.5491	-10.34	-9.67972	-12.9103	-8.14705	-12.5646	-9.48649	-12.5542	-7.28196	-9.30804	-10.0003	-7.66605	-6.45833	-14.4275	-10.8294	-10.7862	-13.1077	-10.3743	-9.5418	-13.5097	-8.40283	-13.3003	-10.2359	-8.33952	-8.20737	-6.43053	-10.7853	-9.18868	-5.98368	-12.8934	-7.72025	-8.37266	-11.3406	-10.7416	-10.7961	-6.13869	-9.04368	-13.2097	-10.4975	-11.6754	-11.2777	-10.136	-11.1634
561.5	429.5	11.1599	4.58562	-8.43625	-11.6951	-12.7865	-13.6146	-11.6137	-8.61654	-9.73026	-11.0434	-11.5262	-11.5747	-10.2414	-7.71125	-8.67954	-10.2197	-9.34292	-7.72318	-12.5399	-11.3713	-12.0254	-10.0564	-9.24479	-10.1666	-10.9463	-8.57946	-11.9768	-9.76623	-5.8348	-6.51305	-5.2187	-7.58512	-10.5507	-7.35302	-8.38748	-7.19331	-6.57375	-9.06572	-11.4925	-7.94761	-6.95237	-5.91287	-10.8996	-10.2085	-10.032	-8.45572	-10.2403	-11.023
562.5	429.5	11.16	4.58562	-8.43331	-10.9006	-11.4018	-12.2519	-10.4032	-10.3738	-10.1259	-12.7426	-10.731	-14.3996	-8.02373	-8.82075	-8.5033	-9.78789	-10.9707	-8.62088	-11.2623	-9.65406	-14.0098	-10.0382	-9.22121	-10.7417	-9.8414	-10.4044	-10.2933	-8.31494	-6.03403	-8.90278	-5.68067	-5.09729	-9.31989	-6.97936	-6.71645	-9.82253	-6.76188	-7.12531	-8.7919	-6.49018	-8.39025	-4.5285	-8.65661	-8.96045	-7.41122	-6.66341	-8.92211	-9.58276
563.5	429.5	11.1601	4.58562	-9.79348	-12.3627	-10.7484	-11.7943	-10.4268	-12.5294	-10.8117	-12.3708	-8.03482	-14.4044	-7.36279	-11.2884	-9.48127	-7.99821	-13.4571	-9.8323	-13.8231	-9.0292	-17.5275	-15.7237	-11.593	-11.6976	-10.5453	-13.2187	-12.3812	-5.52285	-9.46962	-11.3746	-8.23129	-6.13801	-7.22518	-8.13343	-6.81822	-7.32719	-7.35544	-3.69326	-2.60563	-4.31775	-7.10902	-3.48891	-8.60984	-7.75188	-7.63049	-6.04489	-10.594	-8.50041
564.5	429.5	11.1602	4.58562	-11.0179	-12.6605	-10.3077	-9.97194	-14.3242	-12.0336	-12.4485	-11.5345	-6.07732	-13.3004	-6.37985	-11.24	-8.52304	-8.39947	-13.6236	-11.237	-15.6805	-9.93917	-12.8903	-14.2616	-15.0914	-11.9802	-14.3369	-13.9398	-8.29934	-2.94761	-12.3472	-12.7462	-6.0635	-7.6692	-7.08441	-7.10011	-5.22626	-5.98067	-6.11777	-2.83303	-1.46217	-3.10646	-8.19984	-3.337	-6.72408	-7.09684	-9.35751	-4.68179	-10.621	-9.19173
565.5	429.5	11.1603	4.58562	-10.3059	-13.0383	-9.65663	-10.144	-12.018	-13.4736	-12.6907	-11.6966	-6.12261	-11.0547	-5.95148	-8.64248	-7.05066	-9.7487	-11.8194	-11.9086	-14.7943	-13.1097	-13.8819	-10.5674	-14.8439	-10.7876	-15.3615	-13.699	-5.86413	-2.89769	-11.6698	-15.5607	-4.84026	-6.99515	-7.89431	-7.12036	-4.87957	-8.48152	-7.66559	-4.47616	-4.87676	-4.43166	-10.6659	-3.61363	-6.14865	-9.63755	-10.736	-5.40991	-10.3354	-9.26567
559.5	430.5	11.1597	4.58554	-11.5573	-9.81228	-11.2332	-13.1846	-9.91759	-11.9777	-14.5819	-8.65886	-6.94445	-6.28986	-8.69129	-7.55193	-11.4407	-7.72663	-7.75706	-7.21614	-13.6972	-9.14945	-11.4881	-13.1648	-12.8368	-11.945	-12.5897	-8.73641	-10.9832	-9.50985	-9.09181	-10.7126	-8.43168	-10.6068	-9.22611	-7.57125	-8.59213	-10.4198	-6.92098	-8.56127	-12.5913	-10.9462	-8.23507	-12.9339	-13.2307	-10.8222	-10.3795	-9.92482	-10.5654	-11.8419
560.5	430.5	11.1598	4.58554	-12.2883	-13.2992	-14.2869	-13.671	-10.8215	-11.4287	-14.5662	-9.9561	-11.3066	-9.27221	-10.6663	-6.78286	-8.40092	-9.68895	-8.57851	-7.31994	-14.9125	-10.8154	-12.4142	-12.6346	-11.7144	-9.80728	-13.0501	-6.56592	-11.4861	-10.1136	-8.86201	-9.46763	-7.33717	-9.6005	-11.0744	-6.97434	-10.9595	-9.20491	-7.90721	-9.98501	-9.05485	-8.07844	-6.83892	-9.35218	-13.178	-7.30666	-9.79732	-10.2294	-9.36113	-9.64854
561.5	430.5	11.1599	4.58553	-9.45043	-12.9143	-13.1861	-12.03	-13.2081	-10.8643	-13.2431	-11.6427	-11.2033	-10.6734	-8.95688	-7.59548	-7.39581	-9.91802	-11.8546	-8.44289	-11.9587	-9.58115	-11.9941	-10.534	-11.2026	-8.12467	-10.726	-8.41461	-12.4766	-9.84714	-6.68965	-7.35255	-6.63067	-5.21769	-13.4859	-8.11443	-9.18344	-10.0219	-7.79897	-8.63231	-9.9242	-6.27042	-8.33989	-6.93599	-11.7335	-6.75756	-9.38784	-8.10919	-11.6434	-11.4076
562.5	430.5	11.16	4.58553	-9.21944	-11.7658	-10.7595	-10.676	-9.01392	-11.6694	-11.3251	-13.085	-10.5695	-11.7962	-7.54966	-9.01685	-7.69095	-9.61849	-13.7525	-8.752	-11.6652	-10.0224	-13.4022	-11.7023	-10.7768	-9.23317	-10.4508	-11.8301	-11.3285	-8.42172	-7.28863	-8.48031	-8.1113	-4.12565	-9.1906	-7.75371	-8.66068	-8.07094	-7.92033	-8.40413	-7.55052	-7.75568	-8.22978	-7.39625	-12.447	-8.11712	-7.61057	-8.49087	-12.1089	-9.92133
563.5	430.5	11.1601	4.58553	-10.6046	-12.2948	-9.68829	-11.0062	-10.0709	-12.7487	-11.6253	-11.2141	-9.42881	-13.0043	-6.774	-11.2478	-8.78021	-8.88481	-14.9058	-10.1161	-13.9346	-10.2041	-20.7129	-14.0526	-11.9526	-11.8667	-11.4712	-12.1421	-11.3324	-6.56979	-10.2672	-10.4092	-8.48778	-5.89197	-7.65875	-9.83789	-7.73355	-4.99711	-9.28369	-6.66882	-1.58772	-7.96666	-7.75213	-6.63302	-12.6879	-9.41292	-8.96064	-8.45971	-10.0666	-8.42788
564.5	430.5	11.1602	4.58553	-11.6576	-13.4057	-10.4378	-10.2945	-13.4876	-12.6642	-13.0688	-10.4851	-7.43155	-13.5254	-6.64544	-12.7575	-8.90416	-9.69586	-13.9059	-9.92889	-15.4206	-11.4819	-12.1943	-15.362	-13.9727	-13.9898	-15.8129	-11.6093	-9.1657	-5.82032	-12.5746	-13.8108	-7.49822	-7.6462	-9.63053	-11.6455	-7.58628	-6.27968	-8.65082	-6.50431	-0.868696	-5.18896	-9.26604	-5.80132	-8.22387	-9.35634	-11.5712	-6.27823	-8.79141	-7.84304
560.5	431.5	11.1598	4.58545	-11.2351	-14.5206	-13.7149	-12.8848	-11.4601	-12.4483	-13.6415	-12.8752	-10.9522	-10.0807	-9.41593	-8.44014	-9.57525	-10.2086	-10.0054	-8.65231	-14.3117	-12.6455	-12.2577	-12.6717	-11.5026	-9.27873	-10.5123	-8.00147	-10.8607	-10.716	-9.15488	-11.535	-9.13022	-6.36449	-10.9662	-7.53047	-8.57629	-10.3578	-9.62394	-7.76215	-8.80663	-6.24462	-7.56072	-10.1409	-11.8727	-5.3503	-8.682	-9.39442	-9.2184	-8.57506
561.5	431.5	11.1599	4.58544	-10.1218	-15.2339	-12.0278	-12.5746	-15.702	-13.9877	-14.8588	-12.5192	-11.3362	-10.0385	-8.93053	-10.1084	-7.70862	-10.2919	-13.455	-10.2439	-11.2279	-10.3835	-11.6819	-11.0838	-11.4101	-8.31953	-10.4891	-9.47663	-12.3579	-8.82467	-7.89601	-9.43422	-8.42317	-3.90401	-12.0366	-8.40293	-8.4405	-8.34674	-9.5207	-7.56153	-9.02179	-6.07197	-7.26392	-10.4928	-10.0732	-5.46496	-7.83114	-8.2079	-11.1109	-12.3227
562.5	431.5	11.16	4.58544	-10.6016	-13.663	-9.68994	-11.6205	-10.8295	-12.9294	-13.8446	-12.5997	-10.3843	-9.33235	-8.27632	-9.26702	-8.23124	-10.5317	-13.6066	-9.94241	-11.519	-8.86687	-13.9264	-13.1827	-11.2055	-10.2764	-11.8715	-12.8626	-10.452	-8.14409	-8.64851	-9.44077	-7.30972	-4.12586	-8.77205	-8.54461	-7.07372	-5.28875	-7.28487	-7.50019	-6.391	-8.77882	-6.82216	-11.7581	-10.2464	-6.91674	-7.12136	-10.173	-12.2987	-11.7527
563.5	431.5	11.1601	4.58544	-12.2266	-14.1526	-10.2333	-11.6129	-10.6125	-12.9072	-14.2438	-11.0954	-10.2699	-10.8084	-6.22733	-10.4193	-9.44058	-11.0212	-13.2131	-10.2712	-13.3165	-9.22822	-18.1455	-12.6042	-11.0543	-11.9997	-13.4019	-12.3861	-10.1283	-8.74576	-10.3091	-10.5758	-6.08176	-7.00804	-7.25599	-9.99624	-6.30523	-5.28983	-7.32872	-8.82225	-3.15926	-11.2274	-7.56315	-9.18103	-10.7336	-8.32416	-7.6868	-8.67109	-9.34275	-8.79056
561.5	432.5	11.1599	4.58536	-8.99984	-11.2437	-9.92643	-12.597	-15.3827	-13.7695	-15.4891	-13.5342	-10.558	-9.6981	-9.04773	-11.8755	-6.92016	-10.2659	-12.2642	-12.8928	-13.654	-11.2438	-12.6035	-12.5439	-11.4915	-11.2896	-11.8309	-12.4354	-10.4553	-8.47463	-9.2197	-11.0109	-8.43546	-4.73854	-12.7078	-7.90665	-8.02973	-5.44353	-10.2904	-6.07772	-8.5521	-5.02083	-6.7975	-9.77135	-8.24715	-7.00278	-6.74915	-8.02015	-10.0093	-12.2784
562.5	432.5	11.16	4.58535	-10.4633	-10.3688	-8.19835	-10.9287	-11.7168	-13.6714	-19.7217	-12.0083	-10.6986	-8.80502	-7.43269	-8.93215	-9.31401	-11.1528	-11.7765	-11.147	-12.1113	-9.33578	-15.9078	-14.2466	-13.1567	-11.8126	-13.7497	-14.7013	-11.0195	-8.88994	-9.35745	-10.6976	-6.63588	-5.83676	-10.5974	-7.92909	-5.53913	-4.0454	-6.77329	-7.02207	-6.20231	-7.97022	-6.89889	-10.1286	-7.94136	-7.41702	-7.39097	-9.30654	-10.0886	-12.6343
639.5	485.5	11.1668	4.58053	-8.65982	-10.4516	-11.4488	-7.06377	-6.90097	-7.80352	-14.0268	-13.4697	-7.83131	-9.14247	-4.07506	-8.75188	-7.2768	-9.56806	-11.4	-8.71311	-8.92891	-5.08693	-10.8975	-9.02265	-8.76037	-10.3679	-10.4257	-11.8611	-12.2926	-10.4665	-12.8234	-12.847	-9.71657	-8.31385	-12.4134	-10.8072	-11.7503	-6.5118	-10.5117	-8.42715	-8.86645	-7.19744	-11.159	-8.52703	-9.57153	-11.5454	-13.0109	-10.7551	-8.73785	-7.39227
640.5	485.5	11.1669	4.58053	-8.84262	-11.274	-13.7711	-8.65771	-6.31109	-8.89015	-14.0436	-11.5232	-4.51129	-8.01844	-5.83027	-8.13883	-6.94024	-9.1144	-9.90248	-5.75967	-11.2556	-6.27966	-10.6743	-9.42475	-9.95096	-12.1672	-15.7768	-10.7794	-14.296	-9.02691	-9.05068	-10.6533	-9.95449	-6.37568	-10.897	-12.6724	-12.7665	-4.14855	-11.0198	-9.04676	-10.6198	-7.31062	-9.77686	-9.67976	-10.4096	-10.3449	-9.45733	-7.48287	-9.03374	-9.38074
641.5	485.5	11.167	4.58053	-7.37205	-9.76008	-14.0364	-12.4136	-6.4785	-11.1867	-12.4153	-9.20527	-3.1624	-8.79152	-7.67719	-10.7331	-7.56037	-8.52018	-11.0127	-5.64556	-13.2502	-8.36597	-11.5572	-11.0567	-10.8197	-11.5995	-12.5547	-10.4099	-14.5984	-9.60569	-8.47779	-11.5534	-10.6426	-6.47059	-9.22761	-11.7164	-13.0657	-4.12922	-11.7198	-13.3518	-10.2018	-8.68526	-8.2891	-10.4782	-12.5028	-8.98433	-9.29826	-7.02839	-11.4473	-9.62037
642.5	485.5	11.1671	4.58053	-6.68275	-8.64252	-12.7216	-13.3932	-7.67756	-14.407	-13.5313	-7.06409	-4.15594	-11.7473	-7.76558	-10.2151	-8.12511	-9.0793	-11.8377	-8.45632	-12.2208	-9.4304	-12.0005	-12.4057	-11.6541	-10.2941	-9.01713	-11.9919	-11.7067	-10.0304	-8.68473	-12.3424	-11.2238	-9.15284	-8.2085	-11.6951	-11.28	-11.9874	-11.5115	-13.9503	-12.736	-10.4667	-9.15293	-11.1425	-11.631	-8.86102	-11.5134	-8.32657	-12.6641	-7.19734
643.5	485.5	11.1672	4.58052	-6.88114	-8.21561	-11.2357	-10.3809	-8.26344	-11.6041	-11.7998	-6.45933	-6.21996	-12.8578	-6.96936	-9.28003	-8.52574	-11.225	-11.3865	-9.47127	-11.8594	-10.3789	-11.553	-14.1924	-12.4064	-8.89872	-8.62993	-14.1131	-12.4121	-8.55043	-7.97502	-13.4369	-11.5285	-10.5088	-9.87348	-14.8932	-10.2619	-12.9197	-12.2838	-12.5456	-15.3213	-9.80933	-9.96844	-12.1726	-12.392	-10.7246	-13.2229	-9.40402	-12.735	-9.71375
639.5	486.5	11.1668	4.58044	-5.501	-10.2509	-11.9088	-6.42994	-7.39762	-7.86678	-12.0591	-12.5765	-7.42877	-10.8265	-4.26442	-9.0831	-5.38239	-8.52389	-10.5683	-9.25639	-8.70986	-6.40914	-12.0737	-11.1671	-9.08629	-13.4173	-9.50078	-11.2894	-10.4564	-8.74504	-10.2491	-12.3152	-9.91791	-10.2667	-9.90531	-12.5267	-10.3165	-5.11163	-8.32182	-6.95432	-8.53689	-9.14306	-9.20756	-10.7001	-12.6773	-12.2264	-10.918	-10.624	-7.28873	-8.74566
640.5	486.5	11.1669	4.58044	-6.77944	-10.7693	-13.2822	-7.44757	-6.32227	-8.50015	-12.663	-12.1468	-5.34196	-10.0085	-8.12233	-9.16935	-6.7351	-9.32807	-9.49025	-7.60375	-10.3175	-6.81378	-10.2096	-10.8913	-11.343	-14.7032	-15.8228	-11.4746	-10.5239	-8.32939	-7.60843	-11.1795	-9.08851	-7.90725	-10.3247	-13.7385	-10.8784	-4.57929	-11.2311	-8.39738	-9.6156	-9.70959	-6.55227	-11.1084	-11.6877	-10.0032	-9.67752	-8.25433	-7.04251	-9.468
641.5	486.5	11.167	4.58044	-7.84348	-10.9781	-13.9794	-10.5471	-5.97997	-8.87593	-10.8113	-10.7504	-4.66557	-10.2671	-10.1759	-9.72882	-7.41623	-7.72686	-11.6959	-8.42991	-12.1674	-8.31463	-10.3406	-12.5529	-12.1919	-12.2707	-14.7183	-11.9204	-12.5289	-11.2913	-8.54094	-10.9092	-8.40306	-8.7634	-11.1748	-13.7236	-10.0034	-7.0311	-12.3036	-13.3899	-8.99253	-10.88	-5.50198	-11.5211	-10.8515	-7.90452	-10.9197	-7.8809	-10.7014	-10.5361
642.5	486.5	11.1671	4.58044	-8.59684	-10.8458	-14.8251	-11.9968	-6.49981	-9.20491	-10.895	-9.66949	-5.05444	-11.0882	-8.78544	-9.00215	-8.15775	-8.11692	-13.8153	-9.90034	-12.084	-7.78748	-10.7233	-12.9584	-11.2104	-11.1234	-9.82281	-12.9778	-12.61	-10.5193	-10.023	-11.702	-9.99318	-10.4389	-10.2626	-13.9494	-11.1933	-12.9521	-9.8721	-11.4349	-9.48696	-10.0929	-7.28635	-12.8678	-11.1274	-8.12801	-12.1606	-9.7854	-10.7455	-9.80311
643.5	486.5	11.1672	4.58044	-8.80774	-10.1092	-11.1748	-10.1583	-6.67674	-9.58914	-10.1207	-9.33451	-6.13491	-11.3808	-9.9148	-8.38579	-9.66297	-10.4901	-13.1113	-10.0608	-11.8113	-8.56315	-10.7498	-12.7912	-10.5409	-10.1529	-9.35824	-13.944	-13.1119	-10.3025	-9.79164	-11.9764	-11.3266	-11.7033	-11.4819	-13.3507	-12.6224	-13.1723	-9.49275	-10.8147	-10.6286	-10.2472	-8.03178	-14.0935	-12.4468	-10.1119	-12.1277	-12.1438	-10.8641	-12.718
639.5	487.5	11.1668	4.58035	-3.99664	-11.0175	-9.47855	-6.80562	-7.8206	-9.67384	-12.4879	-10.6618	-7.37594	-12.3182	-5.56474	-9.8134	-4.37295	-8.00648	-11.9672	-10.0858	-11.1702	-8.81461	-13.5365	-12.0079	-10.5371	-12.7979	-9.9094	-9.93965	-8.62192	-9.52918	-10.64	-11.973	-9.65431	-10.9121	-9.96208	-12.1567	-8.87182	-5.08696	-9.1527	-6.72962	-10.0679	-11.3302	-9.59822	-11.5273	-11.9427	-13.2332	-9.24985	-10.6236	-8.39113	-8.95305
640.5	487.5	11.1669	4.58035	-4.8412	-10.4285	-10.6711	-7.44169	-7.55458	-10.2176	-13.5021	-11.6273	-6.26014	-11.9582	-9.89598	-9.87108	-5.95715	-8.12215	-11.5739	-10.493	-11.2279	-6.81361	-11.262	-10.8494	-11.8763	-14.1936	-12.2358	-10.2464	-8.03077	-9.72821	-9.27483	-12.8565	-9.04725	-9.69464	-11.8109	-14.8835	-10.1257	-5.61127	-11.1039	-8.50842	-9.5411	-12.5126	-6.1735	-10.9768	-11.3181	-12.49	-9.59698	-8.97395	-6.85419	-8.15766
641.5	487.5	11.167	4.58035	-6.59522	-10.8456	-10.351	-8.88437	-6.92658	-9.66273	-11.7219	-12.2326	-5.71926	-10.635	-10.9072	-8.36479	-7.65759	-7.45308	-13.3715	-12.6465	-11.2681	-6.062	-10.1493	-11.0285	-12.8212	-13.6548	-13.2834	-11.6582	-8.54483	-12.179	-8.95807	-11.0013	-7.43138	-10.5794	-10.7099	-11.6992	-9.07641	-9.14119	-11.5061	-11.0923	-8.64444	-11.8138	-5.13816	-12.1878	-9.65134	-9.07789	-10.9798	-9.57829	-10.1408	-10.6355
642.5	487.5	11.1671	4.58035	-8.5379	-12.1878	-13.4944	-10.0413	-6.47501	-8.17744	-10.4376	-13.7529	-5.47692	-9.69313	-10.0262	-7.04916	-9.42088	-7.53146	-13.3018	-12.5808	-11.0711	-6.25896	-9.61748	-11.1079	-11.1305	-12.8268	-10.7505	-13.1763	-9.87931	-10.2339	-10.5454	-9.98726	-8.35009	-10.849	-8.98793	-11.6244	-9.42925	-13.6047	-9.22416	-9.61634	-8.80852	-10.0782	-6.68675	-13.2106	-9.56871	-8.70592	-11.6813	-11.7198	-9.56995	-12.4033
643.5	487.5	11.1672	4.58035	-7.47609	-10.5143	-10.9884	-10.1667	-6.54233	-7.27637	-9.34823	-15.3097	-6.40222	-10.0949	-10.665	-6.8631	-10.6679	-9.1596	-11.7284	-11.8883	-11.1108	-7.4341	-9.98825	-11.2945	-9.55462	-12.2756	-9.79127	-12.9329	-10.7484	-11.1056	-12.2733	-8.69098	-10.0625	-10.5075	-8.83429	-12.3824	-11.6911	-13.1754	-8.79921	-9.0208	-8.99846	-10.4649	-7.77593	-15.2551	-10.0082	-10.4198	-10.9642	-11.9605	-9.49097	-13.1197
639.5	488.5	11.1668	4.58026	-5.28221	-10.285	-7.53298	-5.54836	-9.52563	-9.66086	-14.144	-11.1756	-8.02084	-14.0496	-6.44309	-8.90791	-4.29869	-11.6341	-13.0571	-10.2496	-13.2393	-11.5987	-13.9312	-10.898	-10.1458	-11.3924	-11.6783	-11.7042	-8.86285	-11.2464	-11.2148	-12.0385	-10.7598	-9.9338	-9.67621	-11.6236	-8.66732	-5.69517	-12.7639	-7.05484	-11.7258	-12.2149	-10.09	-11.329	-9.29274	-13.2421	-10.5298	-8.74472	-10.543	-7.88736
640.5	488.5	11.1669	4.58026	-5.28571	-9.74165	-8.21036	-6.56179	-10.1899	-10.1352	-15.4098	-11.1448	-6.86942	-13.2878	-7.90195	-9.81064	-6.24148	-10.3223	-11.0406	-10.4667	-12.1483	-8.03438	-12.959	-9.18022	-10.2219	-11.8669	-10.5335	-10.1759	-8.38414	-13.9996	-13.824	-14.2695	-11.0282	-10.5829	-14.7063	-14.212	-9.45628	-7.58818	-12.3119	-9.23494	-9.66993	-13.2731	-8.69234	-9.78532	-11.7928	-13.3932	-11.774	-9.24528	-8.98876	-7.03395
641.5	488.5	11.167	4.58026	-6.297	-11.0585	-8.4316	-7.89696	-9.61251	-9.74119	-12.7652	-11.457	-7.11687	-11.4478	-8.82323	-9.70594	-7.66505	-8.76085	-10.5592	-13.3542	-11.1414	-6.9748	-11.5247	-9.39092	-11.2284	-12.9163	-10.5339	-10.8949	-7.08507	-11.3356	-11.6703	-11.94	-7.93983	-9.08535	-9.09245	-10.3989	-8.91051	-11.3017	-10.9282	-11.0625	-10.0456	-11.6585	-7.66421	-11.4074	-10.9134	-9.35798	-12.3053	-9.18331	-8.88655	-9.62731
642.5	488.5	11.1671	4.58026	-6.51726	-10.6173	-9.54153	-7.55129	-8.19818	-7.68388	-10.8471	-14.6659	-7.48865	-10.2087	-10.6757	-7.05123	-10.199	-7.6371	-11.0835	-14.2638	-10.7279	-7.1494	-9.66195	-9.53964	-11.995	-13.1575	-10.4025	-12.6162	-7.5637	-9.16665	-11.21	-10.3561	-7.36827	-9.25346	-7.55711	-8.80146	-9.18426	-13.766	-8.78982	-8.55041	-11.5471	-10.2195	-8.10587	-12.5462	-9.96445	-8.85297	-12.7537	-10.2731	-10.0793	-11.492
643.5	488.5	11.1672	4.58026	-5.16556	-8.85013	-10.5458	-7.85845	-8.63596	-6.16555	-10.5099	-16.3221	-8.23169	-10.5057	-9.58733	-6.63487	-11.0148	-9.09079	-10.797	-12.6377	-11.4715	-7.83825	-9.55146	-10.5826	-9.89691	-12.8453	-10.1239	-12.7691	-8.66595	-9.87928	-13.1217	-7.32221	-8.98476	-8.95877	-7.41069	-10.1731	-9.82776	-12.7337	-8.8435	-7.27729	-10.9686	-10.3659	-8.46323	-14.1205	-8.49971	-10.6413	-11.3775	-9.42015	-11.5153	-12.7306
639.5	489.5	11.1668	4.58017	-8.78274	-8.98607	-6.02736	-4.83114	-11.4619	-6.52449	-10.66	-11.162	-6.70118	-13.2172	-5.44993	-7.38222	-4.30113	-11.5038	-12.1325	-11.0386	-11.1552	-13.0652	-9.98771	-11.5166	-9.53283	-11.9853	-13.9341	-13.8542	-8.8008	-10.9921	-11.5155	-12.9844	-11.0463	-10.6354	-9.85002	-10.8291	-8.49174	-6.90963	-11.4434	-6.7337	-10.4726	-10.2826	-7.67955	-11.2774	-7.00255	-11.5699	-10.1112	-7.04654	-8.87367	-7.17442
640.5	489.5	11.1669	4.58017	-8.34019	-8.72817	-7.30633	-5.78463	-9.82707	-7.70891	-12.4058	-9.08048	-6.80471	-11.8804	-5.182	-7.69195	-6.48616	-11.4617	-10.4811	-9.88404	-9.82779	-9.62258	-11.2475	-9.18871	-8.94894	-10.6772	-9.88102	-11.1332	-10.5959	-15.5086	-13.3302	-13.3125	-14.1483	-10.6316	-13.6005	-12.8465	-9.62292	-11.2417	-14.9179	-8.89485	-11.6538	-12.2054	-10.8314	-9.57545	-11.8331	-12.9629	-13.0359	-9.84073	-9.36457	-8.07442
641.5	489.5	11.167	4.58017	-6.70017	-9.85883	-8.64379	-7.19093	-9.15492	-8.33738	-9.12142	-9.49583	-7.4613	-12.0942	-5.69536	-8.19331	-7.73324	-9.92859	-9.67995	-12.7338	-10.7264	-8.54238	-13.4789	-9.56691	-9.356	-10.7108	-8.79639	-11.186	-8.56806	-12.2683	-13.6359	-11.8419	-9.67004	-8.26019	-9.39253	-12.3724	-8.46864	-15.9825	-12.8329	-13.2307	-11.497	-12.7637	-12.8037	-10.4053	-12.5358	-9.28918	-15.1931	-9.18493	-9.16492	-10.7759
642.5	489.5	11.1671	4.58017	-4.34141	-10.0336	-9.22109	-6.2746	-7.70622	-6.13453	-8.7357	-12.3663	-8.63744	-10.8618	-6.54382	-7.07378	-9.46764	-8.11919	-10.5045	-15.1146	-11.4449	-9.3581	-11.1395	-9.79868	-10.3311	-11.0806	-8.67662	-11.7757	-7.08095	-9.66546	-11.7012	-11.9356	-6.55847	-8.7333	-8.37457	-8.21093	-10.2738	-16.2417	-10.4683	-9.3901	-13.5171	-12.2315	-10.3733	-11.5045	-8.55675	-9.12548	-12.4979	-8.14117	-11.3162	-11.7554
643.5	489.5	11.1672	4.58017	-2.92648	-9.27282	-9.89599	-6.09338	-8.75292	-5.77757	-10.4945	-14.6833	-8.31642	-10.311	-6.80967	-6.96468	-10.9809	-8.85985	-11.2686	-12.0742	-12.7107	-9.39413	-9.22135	-10.055	-9.74906	-12.502	-9.46717	-10.1605	-7.65998	-9.30338	-11.7616	-8.92828	-8.08532	-8.80611	-8.65932	-8.21468	-10.0733	-11.5349	-9.48614	-7.00973	-14.4344	-11.4919	-9.46594	-12.3135	-7.29411	-11.1013	-11.9283	-7.78018	-16.2643	-13.7777
433.5	556.5	11.1483	4.57438	-4.6445	-11.5836	-11.0794	-6.43254	-7.65876	-9.24492	-9.14087	-7.38267	-13.7769	-10.5821	-8.60779	-9.13572	-9.0434	-11.0645	-9.46441	-12.7085	-9.7312	-12.5323	-12.8739	-13.1179	-14.1665	-16.0974	-15.3861	-12.5561	-10.9507	-10.8289	-12.7488	-13.1363	-10.1961	-13.7492	-10.2209	-12.3067	-16.6893	-8.52634	-12.8802	-10.3622	-7.59053	-11.243	-10.6917	-11.6005	-12.2099	-14.4824	-10.8967	-13.2975	-8.60845	-12.1256
434.5	556.5	11.1484	4.57438	-4.37992	-9.21413	-10.1414	-7.78084	-8.3531	-10.6874	-10.8927	-8.41251	-14.104	-10.5858	-11.2317	-10.0726	-7.42356	-13.4252	-9.81492	-10.5957	-8.93928	-13.0668	-12.2193	-11.7981	-11.0587	-13.5873	-13.6505	-10.4979	-12.7177	-12.218	-13.3715	-16.3517	-12.7466	-13.2908	-12.7988	-11.9393	-11.4746	-4.76292	-11.7307	-7.94045	-5.76908	-9.84253	-12.6621	-9.51052	-11.1485	-11.6896	-10.5	-12.2009	-9.37705	-10.1221
433.5	557.5	11.1483	4.57429	-5.48546	-11.8475	-11.5292	-7.60698	-9.54179	-8.95455	-8.77418	-8.19495	-11.5023	-10.6558	-6.90415	-9.49692	-9.60789	-12.1245	-8.7372	-14.1666	-7.8431	-11.6452	-10.4426	-11.3418	-14.6862	-13.6957	-14.5725	-11.3459	-7.97823	-10.8907	-12.609	-14.6276	-9.94055	-12.6643	-8.26129	-11.7308	-13.3405	-7.586	-12.3656	-10.1229	-9.36827	-12.2929	-8.06303	-11.9222	-11.7649	-14.3777	-9.96767	-10.3959	-5.68359	-10.1323
434.5	557.5	11.1484	4.57429	-5.62488	-9.70523	-10.1098	-8.27624	-9.34146	-10.8249	-9.17315	-8.915	-10.7336	-9.82803	-9.2152	-11.2632	-8.98707	-15.7174	-10.7963	-13.111	-8.173	-13.1398	-11.1044	-10.8641	-11.9746	-13.1078	-13.4476	-9.60444	-11.8635	-13.217	-13.4844	-14.3252	-13.849	-19.3204	-9.83314	-11.6724	-11.9604	-3.60776	-11.4651	-13.2646	-6.91525	-12.4751	-12.0719	-10.7559	-11.7921	-14.142	-11.9905	-12.358	-7.21384	-10.0613
435.5	557.5	11.1485	4.57429	-7.2635	-8.77384	-9.5085	-8.39957	-8.73146	-12.094	-9.99584	-9.36916	-9.31292	-9.48175	-9.82602	-10.9397	-8.89062	-12.7589	-9.3259	-10.4799	-8.14729	-11.4039	-12.0901	-11.4772	-11.6957	-12.7457	-14.0231	-9.77143	-15.366	-14.7325	-12.7075	-11.8342	-15.8216	-14.9182	-10.2354	-12.127	-10.7572	-4.37024	-9.6047	-11.6632	-9.53186	-13.6012	-13.1656	-9.99276	-11.4678	-13.0482	-13.3251	-14.6128	-7.96025	-10.2075
436.5	557.5	11.1486	4.57429	-8.26671	-10.148	-7.69159	-8.54977	-10.6149	-12.9082	-10.9378	-9.01195	-8.0831	-10.9208	-9.87279	-8.79868	-9.68298	-11.5411	-6.43051	-9.8317	-8.34721	-9.98506	-12.5835	-11.8749	-13.7772	-12.4461	-15.1734	-10.3937	-13.9553	-15.5993	-11.2734	-10.6199	-13.6983	-10.4748	-9.82977	-12.5895	-11.8674	-5.00145	-8.30659	-11.4661	-12.0261	-11.6451	-12.5737	-11.8156	-11.1676	-12.1775	-10.6257	-12.1047	-10.0089	-11.6982
433.5	558.5	11.1483	4.5742	-8.09113	-12.4647	-10.1653	-10.6078	-9.54973	-8.66744	-7.65272	-11.7978	-11.8548	-9.89522	-5.88676	-7.99759	-9.54166	-12.5946	-9.7108	-15.0545	-7.63438	-11.8988	-10.487	-9.75208	-15.5196	-11.7067	-13.4674	-11.4425	-6.89742	-9.61449	-15.1127	-15.8635	-8.96019	-12.1425	-8.71227	-10.2005	-10.5224	-4.77913	-11.4563	-10.1693	-12.4744	-12.211	-7.7975	-10.9364	-12.9501	-10.2382	-10.389	-9.7756	-4.61977	-7.4132
434.5	558.5	11.1484	4.5742	-6.59918	-12.148	-9.81889	-9.82702	-9.22956	-10.6494	-8.04409	-9.47244	-10.3418	-9.49969	-5.97196	-10.3942	-10.1527	-15.3046	-11.6551	-14.3139	-9.43572	-12.8138	-11.7758	-9.96385	-14.5866	-11.5015	-11.8335	-10.2497	-10.9606	-11.737	-13.8813	-13.3936	-13.1699	-17.1825	-8.28405	-11.7635	-13.3	-4.69851	-12.3109	-14.9689	-10.3413	-12.9041	-12.6782	-11.6473	-12.6582	-12.7877	-11.8218	-13.3057	-7.00751	-8.97108
435.5	558.5	11.1485	4.5742	-6.92687	-10.225	-10.4604	-9.23816	-8.96096	-10.8686	-9.68667	-7.21173	-7.4206	-7.83203	-8.00845	-10.2032	-10.5027	-13.9991	-10.3596	-10.9308	-9.23485	-12.0154	-11.9223	-12.2763	-13.6759	-13.8269	-13.283	-10.3704	-15.4563	-12.9683	-11.8888	-11.8825	-20.1919	-16.835	-9.08565	-11.6193	-13.5462	-7.39408	-9.93012	-17.1972	-12.6511	-14.3975	-13.3242	-11.0715	-12.5467	-13.302	-12.8277	-14.9035	-9.49909	-10.744
436.5	558.5	11.1486	4.5742	-6.99242	-10.2151	-8.66161	-7.52035	-9.53958	-11.1912	-11.1263	-6.55117	-6.68042	-8.51791	-8.56696	-7.39864	-9.08158	-11.5373	-7.52796	-10.7903	-8.61149	-10.2534	-11.5062	-14.7222	-12.6977	-13.4951	-14.3368	-10.104	-14.3916	-11.7168	-10.6574	-10.8272	-15.3101	-12.3921	-10.1722	-11.1376	-13.4925	-4.85312	-9.38996	-14.373	-13.4183	-12.466	-11.1042	-11.0493	-13.5653	-12.4234	-10.4658	-13.9213	-9.7915	-11.5468
437.5	558.5	11.1487	4.5742	-5.69198	-9.21716	-7.47799	-6.07813	-8.92764	-10.3311	-10.7258	-9.03486	-8.00388	-8.42949	-7.52027	-6.52101	-8.84666	-10.4098	-8.33898	-11.2108	-9.44668	-9.99145	-10.2765	-16.4845	-13.3427	-13.7467	-14.0552	-8.51197	-11.9947	-10.1256	-10.5791	-11.0847	-11.9805	-11.3236	-10.5087	-10.9862	-13.7871	-6.29752	-11.1529	-11.13	-10.2886	-8.23429	-10.0185	-9.50496	-9.20899	-11.6801	-9.22132	-9.17993	-9.13987	-10.9566
438.5	558.5	11.1488	4.5742	-4.8402	-8.61059	-7.66332	-5.70305	-7.73906	-8.61683	-8.46727	-12.5873	-7.89069	-8.20337	-7.18077	-6.69655	-12.3794	-9.78335	-10.7028	-12.7461	-10.3096	-11.9953	-9.76189	-13.5296	-13.4236	-13.7289	-11.8833	-8.77382	-12.0999	-11.1014	-9.38638	-12.4386	-9.51032	-11.6123	-9.38307	-11.4738	-10.1375	-7.62346	-11.5343	-9.74775	-9.41426	-8.25711	-7.62591	-8.04476	-6.10271	-9.78719	-12.5943	-8.75879	-9.47702	-9.08187
433.5	559.5	11.1483	4.57411	-9.13038	-10.9205	-8.94623	-10.6998	-8.47803	-8.10969	-7.67097	-14.412	-12.0649	-8.15106	-5.53176	-7.28831	-9.24314	-10.4576	-9.99494	-13.861	-8.44206	-14.7832	-11.0017	-9.83311	-16.2685	-7.2821	-10.4845	-12.823	-8.58987	-7.39612	-14.7684	-15.9817	-7.82086	-12.2027	-10.2691	-11.3947	-10.6553	-6.37158	-10.996	-12.8501	-10.011	-12.5397	-9.14182	-12.9659	-13.2333	-9.26189	-10.0678	-11.3417	-4.21983	-7.19198
434.5	559.5	11.1484	4.57411	-7.23418	-11.7834	-9.65817	-8.66705	-8.95198	-10.4833	-8.9191	-10.403	-10.4674	-8.61581	-4.502	-8.19031	-10.5257	-12.9965	-10.8434	-13.1487	-11.0824	-13.074	-12.8132	-10.5991	-15.4134	-8.78539	-10.2221	-10.9979	-11.0288	-9.09311	-12.5708	-12.9387	-10.9559	-14.1587	-10.2439	-13.3647	-14.2304	-9.6356	-11.5031	-15.2532	-11.8915	-11.3214	-12.5502	-13.4975	-14.1208	-9.26771	-10.4998	-14.0336	-8.09491	-8.68687
435.5	559.5	11.1485	4.57411	-6.75365	-10.441	-11.3345	-9.07644	-9.09743	-10.2123	-11.5224	-7.49044	-7.03384	-7.47886	-5.41129	-9.16285	-10.521	-11.4424	-10.6322	-10.5602	-11.6364	-13.1314	-10.9062	-11.1272	-13.5667	-12.8649	-11.1023	-11.3817	-15.12	-11.6262	-9.68698	-11.825	-15.2817	-13.9383	-11.3136	-13.0634	-15.5643	-5.45855	-9.06737	-14.0449	-15.3722	-11.741	-12.4392	-12.772	-13.5247	-10.5598	-10.5064	-11.0201	-12.353	-11.2041
436.5	559.5	11.1486	4.57411	-6.42335	-9.85285	-10.354	-8.00964	-9.2145	-10.3457	-12.4328	-7.18745	-6.22721	-8.06604	-6.27368	-7.5889	-8.75766	-9.75006	-8.3384	-10.5077	-10.2776	-11.6418	-10.0635	-12.1447	-11.7167	-12.8886	-11.4618	-10.0088	-15.5533	-11.1652	-8.43607	-10.5405	-15.065	-11.6256	-10.8052	-11.253	-13.9818	-4.23312	-8.90102	-12.5934	-13.6276	-11.2346	-9.39014	-11.4606	-13.593	-10.6793	-8.83117	-10.2045	-10.4764	-11.6238
437.5	559.5	11.1487	4.57411	-5.89624	-8.4576	-8.56592	-6.24619	-8.90746	-10.5392	-10.7004	-9.31039	-7.78715	-8.10094	-6.29683	-7.19624	-7.87677	-10.6259	-7.7174	-10.2153	-9.74103	-10.8918	-9.42368	-13.5281	-12.928	-14.8247	-10.9601	-9.32447	-13.5301	-9.80329	-10.379	-10.5265	-12.8679	-10.704	-10.9249	-9.34699	-13.1227	-5.94243	-10.8306	-11.7126	-9.46285	-9.47908	-8.42952	-8.69885	-10.399	-10.6477	-9.2403	-11.6559	-8.81587	-9.67764
438.5	559.5	11.1488	4.57411	-5.66845	-6.31157	-7.90689	-5.87309	-8.09031	-8.18135	-8.772	-12.1479	-7.93575	-7.51544	-7.14238	-10.0106	-11.0847	-10.3559	-7.92677	-13.0852	-10.766	-11.9979	-8.41557	-12.4746	-13.505	-16.0992	-9.72268	-9.80692	-12.7466	-13.324	-10.5199	-10.3928	-11.4214	-12.2955	-10.208	-10.2628	-11.4902	-7.52705	-10.3021	-10.2362	-8.07991	-11.832	-8.9524	-7.3361	-8.64597	-8.2013	-12.125	-13.291	-9.6293	-8.48504
433.5	560.5	11.1483	4.57402	-10.7883	-10.1633	-8.94556	-10.4062	-8.05905	-7.94456	-8.76965	-12.7375	-11.3143	-7.41506	-6.54787	-8.76684	-10.2327	-10.1266	-9.03983	-14.1495	-8.48162	-16.2941	-10.9028	-11.026	-15.8531	-6.22459	-9.12015	-13.5282	-11.7226	-8.0184	-13.2521	-14.1945	-8.31248	-14.9284	-11.9915	-15.5123	-12.1124	-7.75622	-13.3537	-15.4077	-8.61794	-12.0178	-12.0881	-15.1549	-13.2407	-11.3704	-9.45156	-12.8887	-5.51122	-8.99426
434.5	560.5	11.1484	4.57402	-10.5584	-9.88318	-9.09747	-9.31707	-9.48212	-9.55239	-10.3246	-11.0833	-10.6463	-7.46906	-5.62486	-8.45737	-12.1166	-11.0592	-11.1366	-14.6631	-10.419	-13.1599	-12.9058	-11.4675	-14.7295	-7.57417	-9.63571	-10.4416	-12.6525	-9.71575	-11.9375	-11.6954	-11.0636	-12.4292	-12.9151	-14.3336	-12.449	-6.59431	-10.8928	-18.8652	-12.0284	-10.924	-12.2063	-16.7417	-14.4053	-9.28884	-10.1536	-12.9548	-9.72345	-11.703
435.5	560.5	11.1485	4.57402	-8.06326	-9.41364	-10.4753	-9.37911	-11.0566	-9.1962	-12.073	-8.87001	-8.0061	-7.43055	-5.14213	-9.2687	-11.5564	-8.60395	-9.62257	-11.8553	-11.0907	-12.2515	-10.6462	-10.588	-14.5513	-10.954	-10.1827	-12.2491	-14.2292	-11.4887	-8.45017	-11.1038	-12.5739	-10.9273	-14.1832	-14.5847	-13.331	-2.90791	-9.2471	-12.4573	-14.7727	-11.1328	-11.6878	-15.95	-15.0238	-8.35285	-10.2662	-8.99098	-13.0061	-13.3587
436.5	560.5	11.1486	4.57402	-5.93239	-9.52696	-9.52731	-8.74314	-10.5955	-9.88843	-11.7553	-9.47381	-7.30381	-8.3673	-4.82932	-9.03388	-9.86281	-6.97689	-7.60825	-10.4211	-9.77881	-11.1874	-10.6901	-10.3739	-11.6236	-11.2141	-10.4702	-11.086	-14.8332	-11.9235	-5.7493	-9.77272	-12.8473	-10.3884	-13.7089	-11.6399	-13.5771	-3.29892	-9.79679	-9.9622	-14.0838	-10.0937	-9.75942	-12.8098	-13.9676	-8.40633	-9.86934	-8.29399	-11.3826	-12.2851
437.5	560.5	11.1487	4.57402	-7.01824	-8.53297	-7.87052	-7.35518	-9.57419	-11.1221	-9.3683	-11.619	-8.57361	-9.69605	-5.44192	-7.46116	-9.30545	-7.55804	-6.56461	-8.83507	-9.89842	-11.4023	-11.6015	-11.3955	-12.7603	-13.7175	-8.53573	-11.5585	-14.7249	-12.0086	-6.07551	-9.56732	-13.8844	-10.7832	-11.9277	-8.65215	-14.043	-5.37429	-9.5295	-10.1812	-10.731	-9.64113	-8.84112	-10.1066	-12.2313	-9.65646	-10.4	-11.4193	-9.7325	-11.3849
438.5	560.5	11.1488	4.57402	-7.89756	-6.3858	-8.23566	-6.73948	-8.3424	-8.30483	-8.48904	-11.3306	-8.42422	-8.97325	-7.05553	-8.82838	-11.8346	-7.81163	-6.79993	-9.12408	-11.6817	-10.4307	-10.5432	-12.346	-12.078	-17.7412	-7.46156	-9.85596	-12.7626	-13.6466	-8.34467	-9.04625	-14.5581	-12.3982	-11.0976	-9.0568	-12.3376	-5.73894	-8.50356	-10.1314	-7.82875	-11.449	-10.5198	-9.36877	-12.7255	-9.43226	-11.1706	-14.0169	-10.5972	-10.7145
436.5	561.5	11.1486	4.57393	-5.33778	-9.17883	-9.07605	-9.72086	-9.97765	-9.52854	-7.98516	-11.2601	-9.61412	-7.84972	-4.44527	-11.2274	-9.26791	-6.60872	-7.6555	-9.74864	-8.78598	-9.94827	-12.5918	-12.5196	-11.7368	-9.57077	-9.95895	-11.4723	-11.0085	-11.7978	-5.06075	-8.28711	-10.8619	-11.659	-13.0685	-12.1672	-12.2535	-3.14765	-9.48973	-8.49308	-8.60927	-8.81064	-9.40477	-13.2182	-12.9128	-8.5622	-12.699	-9.53069	-11.019	-10.9872
437.5	561.5	11.1487	4.57393	-7.19036	-8.4209	-7.09647	-8.68273	-9.01604	-10.2676	-7.00759	-10.7455	-10.5006	-9.62653	-4.96176	-7.63182	-9.79312	-6.95164	-5.80859	-8.36846	-8.70969	-12.2211	-13.7308	-13.3441	-11.8862	-10.2178	-8.28851	-9.13829	-11.973	-12.503	-4.48169	-7.58756	-12.5217	-11.0962	-11.056	-9.4503	-14.8637	-4.37999	-8.62586	-8.30281	-8.3625	-9.89636	-9.39381	-13.0749	-12.0352	-10.0287	-13.1002	-12.7012	-10.1725	-12.1925
612.5	663.5	11.1642	4.56462	-9.62415	-10.5232	-9.65249	-10.185	-12.5727	-13.6055	-8.33907	-12.1846	-10.6004	-10.3333	-9.74288	-8.4287	-8.64548	-10.9467	-8.3604	-8.80532	-15.498	-10.0658	-10.5835	-12.6265	-10.9721	-12.2345	-9.45196	-11.9953	-10.594	-12.8988	-10.2812	-7.34578	-10.4091	-13.0056	-12.4039	-13.4107	-13.6132	-7.00868	-9.82656	-8.89148	-8.67147	-9.50095	-8.82785	-11.4172	-10.0133	-9.33503	-12.6679	-9.49282	-15.2404	-11.3567
613.5	663.5	11.1643	4.56462	-11.8559	-9.75318	-10.0712	-11.6546	-13.1607	-10.7024	-7.92701	-11.5711	-11.7075	-9.76131	-10.1645	-9.79443	-7.34244	-11.5725	-10.6502	-9.55036	-13.3961	-10.5362	-9.8569	-11.8272	-9.04455	-11.437	-9.10234	-8.73442	-12.7245	-13.0613	-8.20173	-7.53543	-8.57389	-8.53947	-9.54372	-13.2941	-13.3702	-5.68329	-12.6224	-9.44182	-11.8907	-9.52115	-8.27828	-13.3386	-9.12501	-8.53208	-7.20619	-10.5462	-10.3932	-11.7826
614.5	663.5	11.1644	4.56462	-10.0397	-8.90584	-10.1304	-10.4955	-12.2514	-7.43429	-8.18627	-11.0178	-11.1836	-9.99499	-7.65737	-11.9292	-6.63089	-10.25	-11.7552	-10.0253	-10.8969	-14.5367	-9.47705	-14.2794	-9.04601	-10.0452	-7.50667	-9.28803	-10.3091	-8.10505	-4.74746	-10.3076	-9.42729	-7.22165	-7.31592	-11.6141	-11.2835	-5.00139	-11.5838	-10.1705	-11.7274	-7.14468	-7.35623	-10.9006	-11.8917	-7.52389	-6.87656	-10.2551	-9.38783	-13.0295
612.5	664.5	11.1642	4.56453	-8.58584	-12.2159	-11.9285	-11.3466	-11.3853	-8.71015	-8.41825	-12.3804	-10.6045	-8.73154	-9.98928	-8.26451	-8.5753	-10.2596	-7.66649	-7.56853	-13.299	-10.4097	-9.68681	-11.9549	-9.94754	-13.1733	-7.07429	-10.0097	-11.1848	-14.4342	-10.4127	-6.77157	-11.3034	-13.0448	-13.8694	-15.9313	-13.2081	-7.43523	-12.0297	-16	-10.1874	-12.5746	-12.4242	-12.6679	-13.7448	-10.482	-11.7624	-11.4911	-15.4279	-11.4104
613.5	664.5	11.1643	4.56453	-11.8646	-10.4129	-9.01938	-12.7713	-12.1399	-9.78122	-7.40582	-9.26063	-11.6455	-8.98639	-10.1185	-8.57637	-7.63585	-11.5742	-8.02459	-9.51135	-11.5893	-12.6196	-11.3608	-9.84044	-9.51121	-10.5313	-8.26444	-8.90871	-13.1906	-16.0352	-6.60409	-7.80756	-10.1354	-10.2204	-11.1935	-15.1268	-12.8082	-7.76362	-10.6425	-14.6823	-14.0335	-13.4947	-10.0028	-11.5332	-12.9181	-9.17792	-7.29591	-12.1503	-11.6074	-11.76
612.5	665.5	11.1642	4.56444	-6.99799	-10.2855	-10.1321	-8.92037	-9.90153	-6.16239	-9.88744	-11.061	-11.3951	-9.6636	-11.4527	-8.81072	-6.94081	-9.94415	-8.45866	-7.14301	-12.4108	-10.4253	-10.1212	-12.3777	-9.01483	-11.9908	-5.49819	-8.32219	-11.8057	-14.2978	-11.5009	-7.29327	-12.2776	-12.4311	-13.0313	-17.2849	-15.7011	-9.02162	-12.3406	-16.0397	-11.8035	-14.2967	-14.5676	-13.4055	-12.8735	-11.4218	-10.8476	-13.1342	-13.4079	-11.2079
613.5	665.5	11.1643	4.56444	-9.07065	-12.2131	-8.97706	-11.0137	-10.8975	-7.96862	-8.65417	-8.14737	-12.2754	-9.61275	-10.1284	-8.11798	-7.31897	-11.5963	-7.33838	-8.0778	-10.0942	-12.3107	-12.9817	-9.70152	-9.58319	-9.7701	-7.55483	-8.46693	-12.4896	-13.8508	-7.5912	-7.63423	-11.104	-11.8027	-11.3245	-13.8474	-14.098	-9.7548	-7.6988	-13.5147	-13.9011	-15.0552	-11.8603	-12.9537	-13.4382	-10.695	-7.5889	-11.7479	-12.5593	-11.569
374.5	666.5	11.143	4.56459	-10.4934	-14.1246	-13.7826	-13.9162	-13.2107	-11.1993	-12.2547	-10.6636	-7.99322	-8.55386	-8.03709	-9.06998	-8.7189	-8.53587	-7.47438	-12.85	-12.2593	-9.46269	-12.7266	-8.09244	-9.16631	-10.036	-9.77107	-8.40278	-10.8132	-7.746	-4.58009	-7.88777	-9.56822	-6.93321	-8.24636	-10.3856	-13.0461	-10.1728	-8.40409	-12.1322	-7.6567	-5.49591	-11.8419	-10.4722	-9.24955	-10.5298	-15.8236	-11.2284	-9.18077	-8.89628
375.5	666.5	11.1431	4.56459	-10.6792	-14.8077	-15.1375	-15.4464	-11.4269	-11.3936	-11.9565	-10.4219	-8.1512	-9.00666	-10.6897	-9.03878	-9.22459	-8.97984	-4.90591	-14.5106	-10.3748	-9.81228	-12.5206	-11.7683	-11.8085	-8.67855	-14.377	-10.2961	-10.7647	-7.84119	-4.75237	-7.41042	-9.47475	-6.39726	-8.59054	-10.5914	-10.3431	-8.34992	-8.46068	-8.55052	-9.11273	-6.12841	-10.5681	-10.9362	-9.82471	-10.8868	-12.8498	-11.8165	-10.577	-14.1259
376.5	666.5	11.1431	4.56459	-10.2067	-14.8796	-14.5496	-16.6681	-10.4488	-10.9295	-10.8581	-9.8946	-10.3998	-9.89084	-13.0802	-10.0597	-9.72252	-9.46578	-6.62173	-14.1555	-7.55678	-8.30711	-12.5401	-13.4836	-11.8905	-8.42447	-13.2419	-11.0676	-9.94925	-8.30814	-6.68966	-7.24648	-9.57866	-7.15645	-9.70337	-10.0435	-8.34634	-8.02718	-8.24323	-6.74367	-8.77277	-7.05466	-10.0267	-9.17267	-9.15124	-13.1756	-10.8106	-11.0177	-10.7338	-10.5725
377.5	666.5	11.1432	4.56459	-8.86639	-15.1699	-12.0581	-14.6356	-11.1604	-10.6169	-10.4868	-9.23867	-12.7577	-10.5275	-12.9984	-9.41026	-8.30666	-10.2159	-9.57928	-14.1358	-8.19208	-9.20226	-15.117	-14.1647	-11.8953	-9.57085	-9.11535	-11.211	-9.13036	-8.02112	-8.5564	-9.92111	-9.22179	-9.22601	-12.029	-8.66982	-8.02759	-8.25074	-10.2459	-6.40435	-5.93883	-5.64588	-8.13886	-6.44357	-8.68073	-13.3964	-9.1202	-13.3334	-9.81399	-8.47198
613.5	666.5	11.1643	4.56435	-7.47782	-12.1434	-8.71364	-8.53469	-11.4102	-7.82637	-9.87121	-9.97033	-11.9551	-11.2772	-10.7313	-8.82379	-7.85499	-10.6182	-8.31752	-8.54772	-11.1571	-11.87	-12.2133	-10.7233	-9.10533	-9.98584	-6.45127	-9.18813	-10.9073	-11.5405	-9.36152	-7.06051	-10.8102	-9.78235	-9.55322	-11.576	-16.1216	-9.25872	-6.96002	-10.5676	-9.97584	-11.944	-10.329	-14.7476	-11.2819	-9.10537	-8.60649	-9.83762	-9.61961	-11.305
373.5	667.5	11.1429	4.5645	-11.1222	-13.7706	-15.075	-14.8643	-10.5587	-10.07	-9.10208	-12.2864	-9.40246	-9.49186	-8.18348	-10.1965	-8.54405	-10.897	-12.8633	-9.2329	-8.64179	-8.35763	-9.06589	-5.71682	-6.84058	-12.4835	-6.356	-9.50201	-8.32321	-9.4122	-7.07749	-9.43536	-9.70125	-7.54169	-9.71133	-11.8423	-11.1119	-8.93018	-8.71116	-11.236	-8.75069	-7.7432	-12.293	-10.3216	-9.44026	-13.9323	-12.4134	-13.2867	-6.55203	-7.40286
374.5	667.5	11.143	4.5645	-9.89534	-13.9184	-14.8088	-14.3413	-11.8434	-11.0886	-11.1026	-12.834	-8.80483	-9.44512	-8.74443	-10.5902	-9.9855	-9.87418	-9.32004	-11.8033	-8.94353	-9.85978	-10.5067	-6.07733	-8.38385	-8.83885	-7.82578	-10.9477	-9.36502	-6.88238	-5.29369	-6.65613	-9.43096	-6.75772	-9.82729	-11.3606	-11.401	-7.68569	-7.46468	-12.4036	-8.54429	-6.14018	-13.0686	-9.86382	-12.3135	-12.3858	-13.3826	-13.5068	-7.29355	-8.8643
375.5	667.5	11.1431	4.5645	-10.5027	-15.4547	-15.9021	-15.4463	-11.6088	-11.5714	-12.7486	-11.1712	-9.00508	-9.79118	-10.472	-10.5064	-10.2801	-9.84753	-8.16347	-12.1069	-7.12572	-11.6979	-11.0566	-8.33509	-11.7743	-8.23672	-13.1801	-10.9944	-9.15443	-6.27622	-4.77926	-6.80039	-9.40005	-7.31727	-9.61672	-10.3176	-9.06606	-7.4967	-5.89331	-8.56851	-9.15675	-6.64567	-13.0734	-9.73464	-13.1965	-12.3195	-11.5578	-11.5344	-8.60038	-12.3906
376.5	667.5	11.1431	4.5645	-9.8376	-13.2541	-14.4714	-14.8082	-9.41923	-11.9996	-13.2651	-10.0322	-11.6861	-10.182	-10.1344	-9.6926	-9.97061	-10.2521	-9.91809	-11.3812	-5.01917	-9.72952	-9.8482	-10.5499	-11.9812	-9.7899	-11.9584	-11.5044	-9.25406	-6.75378	-5.29963	-8.83685	-9.0796	-8.53989	-9.63653	-8.32542	-8.2744	-8.70628	-6.2895	-6.35539	-8.72856	-7.69752	-10.608	-7.49973	-10.4016	-12.8145	-9.11116	-10.6432	-9.76722	-10.961
377.5	667.5	11.1432	4.5645	-9.2806	-12.6732	-11.5464	-11.6038	-8.54739	-12.0585	-10.1726	-9.92139	-12.1142	-10.3217	-11.4652	-7.46742	-8.15836	-11.8106	-11.4215	-11.9258	-5.63839	-10.1043	-10.4023	-13.1774	-11.5949	-11.1043	-8.5365	-11.9695	-10.5613	-6.81654	-6.66513	-11.2772	-9.78999	-9.00314	-10.3502	-7.4733	-8.74208	-10.5431	-9.2656	-6.82526	-6.89616	-6.15129	-9.17205	-6.39336	-8.23529	-11.7831	-8.2506	-10.5616	-8.15211	-8.20849
378.5	667.5	11.1433	4.5645	-8.18319	-13.6929	-10.6393	-9.7992	-10.1652	-12.4943	-8.69669	-10.6312	-8.89396	-10.9339	-12.0879	-5.33578	-7.83167	-12.3495	-11.8631	-14.5432	-7.64781	-13.3471	-12.2465	-16.4374	-13.0534	-12.9821	-9.14512	-14.1673	-11.3852	-8.46922	-7.9048	-11.1808	-12.7696	-9.83139	-11.2813	-8.13372	-8.95487	-8.7741	-9.39713	-8.82281	-5.56255	-7.43608	-10.7396	-7.60562	-8.03945	-11.7462	-9.37918	-10.7207	-5.80365	-8.27171
379.5	667.5	11.1434	4.5645	-10.3713	-9.52767	-10.3134	-9.48079	-11.045	-10.693	-9.35368	-9.69918	-7.83873	-12.5265	-12.2362	-5.79493	-8.21018	-12.9978	-12.3106	-15.0082	-10.2473	-14.6488	-13.8694	-15.4952	-13.7686	-16.5435	-10.1257	-16.2104	-12.9168	-9.72323	-8.01709	-11.7608	-12.8982	-10.1657	-10.7431	-9.99331	-9.94075	-7.89723	-9.12661	-8.24849	-5.4692	-13.2206	-13.5182	-7.70075	-9.6015	-12.5266	-12.3125	-10.3679	-7.76818	-13.9313
380.5	667.5	11.1435	4.5645	-11.979	-7.55674	-7.72815	-8.6889	-9.65039	-10.3911	-11.1535	-8.04687	-7.58611	-12.1546	-11.4655	-8.36452	-7.6596	-12.3607	-12.7755	-12.933	-10.9404	-14.2944	-13.1757	-13.0631	-12.4845	-18.7763	-8.97414	-13.2017	-13.8086	-9.87638	-9.22123	-13.8916	-11.936	-11.8969	-11.2022	-10.5839	-10.8966	-8.69565	-10.5531	-7.88036	-7.56932	-13.3399	-12.9716	-8.83651	-10.8184	-15.1468	-13.1146	-10.3374	-8.86146	-16.1146
381.5	667.5	11.1436	4.5645	-11.1968	-6.69157	-5.8814	-9.0248	-9.97866	-10.0801	-11.3791	-8.30222	-7.53016	-10.0189	-6.57737	-7.66256	-6.84462	-13.2639	-13.931	-12.1023	-10.6115	-13.6425	-10.7501	-12.8571	-11.6626	-14.8102	-8.62139	-10.6306	-15.0311	-11.5599	-11.7494	-14.2043	-12.8671	-14.597	-10.6559	-9.99148	-10.8139	-9.10931	-11.9919	-8.37964	-10.0399	-9.84405	-11.8498	-10.5342	-11.9154	-12.9913	-10.7844	-11.4494	-10.5397	-17.2302
373.5	668.5	11.1429	4.56441	-8.9724	-16.6645	-12.6515	-13.6283	-8.38124	-12.1615	-10.7553	-12.9793	-9.92306	-11.368	-11.4775	-10.5712	-9.5967	-11.2653	-13.1201	-10.2818	-7.9678	-9.07621	-10.0843	-6.67011	-7.19327	-11.8	-6.37219	-10.1981	-8.12458	-7.94119	-9.03283	-11.5361	-9.48248	-8.59676	-10.8436	-12.5274	-13.8049	-8.4551	-9.39441	-10.1441	-11.6041	-8.53531	-9.90268	-11.0136	-8.35381	-12.1359	-10.7802	-14.4221	-8.0173	-7.44582
374.5	668.5	11.143	4.56441	-7.12608	-15.9301	-12.9689	-12.8559	-9.75901	-13.6747	-10.8606	-14.8867	-8.98591	-11.1221	-10.6865	-11.5911	-11.49	-12.4952	-10.3114	-12.5875	-7.16591	-10.0568	-10.3771	-5.52637	-9.07451	-9.02034	-7.59957	-10.5844	-9.31483	-5.42822	-6.77672	-7.16606	-9.23507	-7.50803	-10.8507	-10.9793	-12.133	-7.57719	-7.4251	-11.268	-9.91776	-7.6273	-9.66928	-11.071	-14.7065	-12.8376	-10.1258	-11.8042	-9.20299	-7.41367
375.5	668.5	11.1431	4.56441	-7.48898	-15.4685	-14.1402	-13.6448	-9.5116	-11.7328	-11.2185	-11.1914	-9.64617	-10.8353	-8.75596	-11.8726	-11.7536	-14.236	-10.6374	-11.6667	-6.06439	-11.6166	-10.2363	-5.7397	-10.614	-9.03943	-9.47926	-11.4437	-8.46701	-5.42457	-5.35064	-7.46963	-9.8777	-8.25497	-10.3303	-9.36641	-9.94734	-8.12874	-6.18759	-8.43525	-7.90425	-7.84904	-10.0122	-10.5573	-14.4994	-12.55	-9.23873	-9.77276	-8.57866	-10.2338
376.5	668.5	11.1431	4.56441	-8.33135	-12.5554	-13.2823	-13.177	-8.48131	-12.4053	-11.6063	-11.1293	-12.4311	-9.13468	-6.72685	-10.8269	-11.3944	-15.5169	-11.7334	-10.6755	-5.4018	-9.8244	-9.12084	-7.6082	-10.7072	-10.5355	-10.5437	-12.7763	-8.2426	-6.32864	-6.02574	-11.1489	-9.30976	-7.54683	-8.63858	-7.53001	-9.86332	-9.69061	-6.52287	-6.52132	-8.30988	-7.72485	-8.73056	-9.16791	-11.0037	-11.1343	-8.87459	-9.59103	-8.92148	-11.846
377.5	668.5	11.1432	4.56441	-9.60974	-12.2217	-10.3985	-9.51935	-8.19598	-11.9091	-9.19746	-11.3302	-11.883	-8.86988	-9.13144	-7.9953	-8.6057	-13.7998	-13.1446	-12.5269	-6.02722	-10.5349	-9.34261	-10.5556	-11.9444	-11.1315	-8.59523	-12.6494	-10.7724	-6.9954	-7.67253	-12.3808	-9.31456	-7.32934	-8.72899	-6.96988	-10.1085	-9.05648	-8.88104	-6.87825	-9.90083	-6.66108	-8.82784	-9.09813	-7.93058	-9.8332	-8.71567	-9.59338	-7.17659	-7.96589
378.5	668.5	11.1433	4.56441	-9.27135	-13.6934	-9.92901	-8.37646	-10.9107	-10.8325	-8.96621	-9.13039	-9.01411	-10.6136	-11.4252	-5.90124	-7.9062	-13.9683	-13.8849	-16.2169	-7.72976	-12.9877	-10.8168	-13.4719	-15.384	-12.621	-7.80475	-14.0743	-14.415	-9.37069	-8.94485	-10.2588	-10.5225	-9.12185	-10.5186	-7.93481	-8.92204	-8.34672	-10.214	-8.35268	-10.2196	-7.72183	-10.6774	-10.5803	-7.92431	-10.9842	-9.874	-10.5394	-5.35753	-6.0257
379.5	668.5	11.1434	4.56441	-10.8515	-9.43489	-10.7243	-9.01455	-11.5515	-9.36662	-9.7548	-8.63492	-7.02386	-13.3188	-12.5317	-6.18206	-8.35179	-14.3902	-12.6404	-14.5263	-9.22616	-13.7004	-11.9795	-13.8427	-13.3738	-15.9543	-7.7999	-15.2493	-14.9646	-10.3746	-8.56172	-10.3094	-10.4322	-11.0465	-11.142	-9.4693	-9.89746	-9.33773	-8.81628	-8.6746	-9.65368	-11.7534	-12.855	-10.6875	-11.3821	-13.6408	-13.1644	-12.2878	-6.48453	-9.47445
380.5	668.5	11.1435	4.56441	-12.7623	-8.2751	-7.38476	-7.69424	-8.69988	-7.94716	-10.7551	-9.06142	-6.03203	-12.4743	-10.9994	-9.26766	-8.29309	-14.7082	-10.7031	-12.2035	-9.49725	-14.4815	-12.6848	-12.6272	-10.6316	-18.3469	-7.70467	-12.9456	-13.6514	-9.11134	-9.28491	-13.1804	-10.7482	-12.5596	-9.56432	-9.78058	-11.2226	-9.16298	-8.52242	-8.56787	-9.86362	-12.5531	-11.9411	-11.7248	-13.8725	-15.671	-12.9118	-12.1344	-7.9551	-12.0376
373.5	669.5	11.1429	4.56432	-6.29505	-15.9498	-10.5319	-12.6436	-7.57218	-12.5414	-10.6785	-12.3025	-11.3646	-15.8277	-11.2049	-8.50735	-10.9304	-8.80767	-12.8864	-10.201	-9.45053	-10.5574	-13.6845	-9.62883	-8.7354	-11.1118	-7.96528	-10.3161	-11.9088	-9.51717	-10.255	-13.8819	-8.94219	-12.0845	-11.5589	-14.3429	-13.8775	-7.74693	-9.83733	-10.7054	-13.3892	-11.2925	-7.84143	-9.73567	-8.34363	-10.8899	-11.1022	-12.1388	-7.99184	-4.28693
374.5	669.5	11.143	4.56432	-4.68227	-14.8288	-12.6795	-11.8518	-9.28582	-10.6109	-11.7097	-13.6276	-9.95707	-15.0467	-11.3356	-10.6125	-11.4071	-10.3372	-9.43771	-11.2674	-7.22939	-9.96607	-11.1631	-6.89262	-9.5928	-10.5867	-8.91407	-10.0254	-12.2073	-6.76103	-7.93952	-8.12542	-9.51892	-9.72629	-12.7236	-11.9972	-12.1207	-7.46203	-7.8232	-9.8754	-10.212	-10.1375	-8.04443	-11.3059	-12.0384	-11.2903	-10.1448	-9.69668	-13.9079	-4.66139
375.5	669.5	11.1431	4.56432	-5.44519	-13.4802	-13.9607	-12.597	-9.32335	-9.33276	-11.6141	-12.287	-10.93	-12.1847	-8.27997	-12.5552	-12.2013	-9.839	-9.64324	-11.5825	-6.93403	-11.6287	-10.4479	-6.28934	-8.99899	-10.7662	-8.61066	-11.8359	-9.71602	-6.27524	-6.14817	-7.64184	-10.6741	-10.6105	-11.4432	-10.8644	-10.5199	-7.77662	-7.41831	-7.45806	-6.9356	-8.15734	-7.94967	-11.6598	-11.3544	-10.2308	-9.40426	-8.65656	-13.86	-8.04365
376.5	669.5	11.1431	4.56432	-8.02076	-12.5801	-12.888	-13.8608	-9.43082	-10.8555	-10.3835	-12.8334	-12.7943	-9.19144	-6.07113	-12.3791	-13.2614	-10.9528	-9.68178	-11.1349	-8.59786	-11.103	-10.7466	-7.92833	-10.0449	-11.6149	-8.26622	-13.4561	-8.69601	-7.2004	-7.18357	-10.2392	-9.61091	-8.66489	-9.06631	-9.75573	-9.614	-7.52158	-8.61449	-6.58643	-7.84	-7.30858	-6.60348	-11.2874	-11.8339	-8.77842	-9.61253	-9.04984	-11.2013	-11.1233
377.5	669.5	11.1432	4.56432	-11.0633	-13.568	-10.0612	-9.4205	-9.69442	-11.2398	-9.70945	-11.2373	-11.3134	-9.88467	-8.3028	-9.55939	-10.3806	-10.9706	-10.9882	-12.7662	-9.80121	-10.6092	-10.9581	-10.4844	-12.7468	-11.7847	-7.553	-11.9876	-10.5464	-8.7416	-9.90469	-9.43736	-8.23302	-7.02732	-9.27022	-7.9631	-8.46893	-7.4215	-10.0949	-7.83387	-12.6332	-7.99432	-6.77671	-12.1071	-8.98058	-8.99273	-9.70241	-8.80324	-9.00594	-9.34658
378.5	669.5	11.1433	4.56432	-10.3019	-9.95768	-9.97933	-8.25788	-11.6168	-11.2654	-12.4317	-8.10061	-11.0679	-11.2357	-10.0068	-6.80324	-9.07521	-10.981	-13.3902	-13.9793	-9.77136	-12.0385	-10.7885	-11.6433	-14.5501	-12.5192	-6.51716	-12.7716	-14.3458	-10.0714	-11.4318	-8.81742	-7.30123	-8.1227	-10.3622	-8.67174	-7.16165	-8.80846	-10.4944	-8.68422	-16.4068	-8.68717	-7.83132	-11.4281	-8.37116	-10.5511	-9.53983	-8.56584	-7.80141	-8.20393
379.5	669.5	11.1434	4.56432	-9.33877	-7.46452	-9.69602	-8.70682	-10.983	-9.02166	-12.0219	-8.62328	-8.78552	-10.3891	-9.13206	-6.34402	-9.05038	-11.262	-12.5682	-11.5856	-9.37697	-13.7446	-9.95769	-11.6423	-12.9364	-15.044	-6.7854	-15.4147	-14.894	-10.2821	-10.8596	-9.5782	-7.93901	-8.72559	-9.13752	-10.2888	-7.89197	-9.45593	-10.0574	-8.8298	-13.4497	-10.3949	-9.70079	-10.6083	-11.1162	-11.0861	-12.8478	-10.9334	-8.70681	-9.62314
380.5	669.5	11.1435	4.56432	-11.0844	-8.459	-7.81206	-7.43123	-6.73998	-6.81921	-10.6218	-10.6852	-5.70981	-10.6235	-8.49365	-10.7433	-9.77784	-12.9975	-9.61059	-10.1105	-9.79372	-14.1916	-10.207	-12.0278	-11.4117	-17.7328	-7.40572	-15.5745	-13.0219	-8.88526	-11.0389	-12.9335	-10.0627	-9.61356	-6.57201	-10.9026	-9.0538	-9.41039	-9.86035	-9.7995	-11.1599	-12.5634	-11.1373	-10.0754	-12.7633	-13.2461	-15.3117	-12.8009	-9.44574	-10.1602
373.5	670.5	11.1429	4.56424	-7.24203	-12.9676	-10.8952	-11.6385	-8.24753	-10.4441	-9.9463	-11.2483	-11.438	-13.0734	-8.31658	-9.183	-11.5782	-7.58047	-10.9159	-6.81641	-11.6414	-10.0973	-11.5277	-12.4337	-10.2403	-9.77761	-8.27699	-10.9216	-11.8902	-9.56223	-10.1832	-11.7297	-7.69388	-13.108	-12.8097	-11.5537	-10.4586	-7.49008	-9.58688	-9.51301	-12.2993	-10.9227	-8.68005	-11.8685	-9.59937	-9.54641	-12.8889	-10.8361	-6.8816	-2.48749
374.5	670.5	11.143	4.56423	-5.48422	-12.1691	-13.3249	-11.4123	-9.77166	-7.28808	-11.0585	-11.6517	-12.0711	-15.0304	-7.54658	-11.2702	-10.5207	-8.34308	-9.22792	-7.4861	-8.68068	-10.0165	-9.02306	-8.68957	-9.51998	-10.824	-8.72158	-10.1188	-14.8125	-10.2225	-9.27298	-8.58824	-9.8434	-10.6649	-15.8279	-12.1567	-9.62539	-7.4796	-6.79417	-8.01683	-9.21531	-11.1733	-9.796	-12.0896	-11.4365	-9.81457	-11.2185	-9.88866	-11.3673	-3.97454
375.5	670.5	11.1431	4.56423	-5.89821	-11.7241	-14.0379	-11.4765	-10.7707	-7.36606	-11.9734	-10.9892	-12.5414	-13.7485	-7.90468	-12.9781	-9.68714	-6.95845	-9.86219	-10.8579	-9.23785	-12.0593	-9.7727	-8.95157	-8.03397	-11.1822	-9.30922	-11.8177	-12.3426	-8.05441	-8.78883	-7.49951	-10.3636	-10.3214	-13.2745	-12.1829	-9.26476	-7.0883	-6.60061	-5.22986	-6.75351	-8.28158	-8.88339	-10.4337	-9.0874	-7.95521	-8.77812	-9.90465	-12.2045	-7.81979
376.5	670.5	11.1431	4.56423	-8.60455	-12.2363	-12.3188	-12.9127	-11.6303	-9.34822	-11.0914	-12.53	-11.5221	-12.2339	-7.56131	-13.3587	-10.0729	-6.92466	-10.0355	-10.7913	-9.82719	-13.692	-12.6243	-11.5661	-9.32792	-11.6264	-8.56971	-11.7257	-9.47535	-8.44335	-9.48342	-8.94132	-9.66498	-11.5843	-12.3421	-11.4633	-9.02605	-6.73931	-9.13833	-4.75627	-7.72555	-7.57932	-7.21639	-8.88949	-12.9055	-7.60202	-8.89078	-10.4302	-13.0643	-10.4643
377.5	670.5	11.1432	4.56423	-11.6056	-12.5364	-10.2195	-11.5873	-11.2552	-11.0407	-10.6762	-11.8325	-9.42921	-12.693	-9.30317	-12.2903	-11.0171	-8.22407	-11.1567	-10.1692	-10.3401	-12.0056	-12.1514	-12.1275	-12.3774	-11.6586	-6.48045	-11.479	-10.113	-11.0362	-11.88	-8.80793	-7.93526	-9.82803	-10.483	-10.0684	-7.38084	-7.57817	-10.0745	-6.7824	-11.6534	-11.1606	-6.20216	-9.80498	-10.8492	-9.05194	-10.4132	-9.89288	-11.2408	-10.4255
378.5	670.5	11.1433	4.56423	-10.9706	-7.95468	-9.77708	-10.2359	-12.333	-12.0295	-13.5328	-9.79038	-9.20083	-11.4996	-10.9539	-8.92194	-11.0245	-8.87898	-12.8637	-10.9771	-11.0183	-10.415	-11.0469	-11.2887	-13.1177	-10.6478	-5.79407	-12.0257	-12.1971	-11.8128	-13.9682	-8.04829	-6.39966	-7.9073	-9.49029	-12.3462	-5.55518	-9.30339	-9.80131	-8.11915	-13.2042	-13.6465	-5.51671	-12.0578	-9.73058	-7.57221	-8.26461	-7.81638	-9.93066	-11.5099
379.5	670.5	11.1434	4.56423	-8.5963	-6.13978	-8.77621	-9.29275	-11.8429	-10.7354	-13.1628	-10.5231	-10.4931	-10.678	-9.28657	-7.27639	-9.2298	-9.70808	-13.4315	-9.37114	-10.3888	-11.6831	-8.91677	-10.6712	-13.2353	-11.8835	-7.1109	-14.6333	-12.9271	-10.3763	-12.9704	-9.48569	-7.13191	-6.347	-8.63351	-12.8406	-6.08877	-11.1389	-12.2997	-10.6751	-11.4181	-10.1686	-7.20823	-11.169	-12.2079	-7.06171	-9.77645	-9.57817	-10.4486	-11.6751
380.5	670.5	11.1435	4.56423	-9.04243	-7.69989	-7.69492	-8.38313	-7.84095	-8.3909	-10.852	-11.9453	-7.86959	-11.7429	-8.36601	-9.49963	-9.09773	-11.1625	-10.919	-8.63371	-10.7315	-11.5136	-8.5548	-11.1521	-13.9874	-14.6858	-8.80182	-16.0676	-12.5371	-8.72629	-11.4309	-11.7996	-10.3645	-6.94035	-6.59389	-13.03	-6.88399	-10.6544	-11.2967	-11.6332	-9.88572	-10.4408	-11.7856	-9.63494	-12.1066	-10.5059	-11.2762	-13.6846	-10.6237	-10.4652
373.5	671.5	11.1429	4.56415	-6.9321	-14.0244	-10.7628	-10.2763	-8.37034	-11.1464	-8.9359	-11.2013	-9.99096	-9.37177	-7.26503	-11.505	-12.1618	-7.84574	-7.42782	-6.23278	-11.8267	-9.32071	-10.964	-12.488	-10.1782	-9.89121	-8.24317	-9.94858	-8.76829	-9.74488	-10.4929	-11.2067	-8.53133	-9.61422	-12.5152	-8.79006	-8.93902	-8.35216	-9.62572	-7.77347	-10.8392	-8.60389	-11.6816	-12.1704	-10.4681	-8.96219	-14.3615	-9.52815	-7.91514	-2.11013
374.5	671.5	11.143	4.56414	-6.53426	-13.9882	-11.1568	-10.2672	-9.88613	-7.91689	-9.7468	-11.2028	-12.2022	-10.3544	-5.72552	-12.7728	-10.3675	-9.15267	-7.78946	-6.12111	-10.6277	-9.42554	-9.28343	-10.9603	-9.12212	-10.1414	-7.12468	-9.22508	-11.5988	-10.8275	-11.2197	-11.2711	-10.2999	-8.58725	-12.9034	-10.2383	-9.28367	-8.77334	-5.97547	-7.51407	-7.72129	-10.8848	-13.0607	-11.4246	-11.704	-9.27955	-12.1436	-13.2211	-9.34607	-4.99545
375.5	671.5	11.1431	4.56414	-6.62506	-12.6953	-11.9662	-9.76463	-10.6932	-7.31698	-11.0835	-9.95215	-11.8867	-12.0826	-6.60754	-13.0312	-7.87882	-8.27189	-9.23683	-9.54765	-11.2354	-10.4878	-9.92005	-11.774	-8.29185	-9.81058	-8.0007	-11.7206	-13.0462	-10.3235	-11.5955	-8.8834	-8.77767	-8.35648	-9.65781	-10.7999	-9.00786	-8.42287	-5.72526	-4.7055	-5.88587	-9.11971	-9.95482	-8.53931	-9.34297	-7.44324	-8.00764	-14.0119	-8.28987	-9.93362
376.5	671.5	11.1431	4.56414	-7.15592	-11.8475	-11.6098	-10.7498	-11.2682	-8.99484	-12.3282	-10.4743	-10.3751	-12.8344	-8.65551	-13.5851	-8.22529	-8.02815	-10.6163	-10.6545	-11.1925	-12.8563	-12.9978	-12.8735	-9.87357	-10.9415	-10.2295	-11.1856	-9.27897	-9.81299	-10.3833	-8.75741	-8.1675	-9.44745	-10.2626	-8.51839	-8.86976	-7.96884	-9.4851	-3.50731	-6.60579	-8.6606	-8.97248	-7.45612	-11.1727	-7.86446	-7.6692	-13.2447	-11.0071	-11.8028
377.5	671.5	11.1432	4.56414	-8.20425	-10.431	-9.93348	-12.135	-12.0106	-10.5799	-11.603	-12.7718	-9.20134	-12.1406	-10.0047	-13.4914	-11.145	-8.29989	-12.683	-9.02968	-10.4741	-12.4639	-14.2164	-12.2862	-12.073	-10.0937	-7.31573	-10.6964	-8.48235	-10.4693	-9.87311	-10.4221	-7.40914	-11.9469	-8.53332	-8.86716	-7.61955	-9.44362	-10.8102	-4.43924	-9.84904	-10.71	-8.31439	-9.5026	-9.54735	-9.32186	-9.09541	-14.4859	-11.1095	-12.0132
378.5	671.5	11.1433	4.56414	-9.30309	-8.30409	-9.00895	-12.4958	-13.7154	-11.6765	-11.423	-13.3854	-8.61685	-11.1236	-10.6677	-11.1544	-12.5222	-8.55038	-15.6344	-9.96524	-10.9913	-9.03399	-13.2227	-11.5014	-12.3718	-8.52211	-6.73079	-12.3469	-10.0571	-10.4792	-12.8294	-9.26462	-7.59352	-9.01702	-7.5169	-13.0589	-6.02344	-11.348	-10.3287	-6.29596	-10.0502	-10.9658	-5.68126	-13.3154	-8.64725	-6.54256	-8.57005	-10.7307	-8.8383	-15.235
379.5	671.5	11.1434	4.56414	-7.26107	-6.97533	-7.38522	-11.9535	-13.8985	-11.7743	-11.8912	-13.0945	-10.1188	-12.5231	-10.2172	-8.6287	-9.61085	-9.28519	-17.3442	-9.54094	-11.4381	-10.7069	-10.0816	-10.8066	-13.0315	-9.91765	-8.96499	-13.9374	-12.1699	-9.78117	-11.4121	-9.65593	-8.94604	-6.5221	-8.94156	-13.7731	-5.91591	-11.5758	-14.6104	-8.86326	-8.45274	-7.77927	-6.78517	-12.2054	-11.1138	-6.18674	-8.83989	-9.99301	-8.32371	-11.4103
380.5	671.5	11.1435	4.56414	-7.3156	-7.46155	-6.0209	-10.461	-11.3733	-11.4186	-11.0448	-11.8263	-11.4317	-13.6786	-9.1183	-9.16985	-8.15462	-9.75483	-13.7852	-9.10742	-12.0837	-10.3005	-9.61183	-10.8323	-14.571	-12.498	-9.54798	-13.7292	-13.4306	-8.61137	-9.07789	-11.0292	-10.8252	-7.06671	-9.31696	-14.5504	-6.87979	-7.36057	-10.8761	-11.1808	-7.59678	-5.97717	-11.4445	-11.0243	-12.7964	-9.20997	-9.15543	-11.909	-8.79529	-10.8641
373.5	672.5	11.1429	4.56406	-5.31701	-14.7097	-9.18755	-8.85034	-7.72453	-12.2853	-10.6871	-11.458	-9.73967	-8.87587	-7.46332	-9.32491	-11.4054	-8.54013	-4.89205	-7.13124	-12.045	-9.83125	-9.43306	-11.4911	-9.80619	-8.84693	-9.43778	-8.00996	-8.83908	-10.8426	-11.2687	-13.0535	-8.86492	-9.04873	-12.2774	-8.92669	-7.3227	-9.36238	-11.7223	-7.22023	-10.1171	-8.1978	-11.2301	-10.5606	-9.67283	-9.2701	-17.8961	-8.94542	-9.94126	-3.73236
374.5	672.5	11.143	4.56406	-4.57899	-12.7954	-9.49941	-8.64655	-9.3648	-10.1275	-11.1523	-11.5757	-10.8447	-9.9547	-6.08938	-10.7311	-11.1784	-11.0331	-6.90557	-5.76773	-10.3121	-8.66018	-8.47111	-9.43177	-8.88282	-7.87688	-7.77638	-6.73926	-11.9183	-12.5202	-12.7372	-13.9646	-10.0529	-7.6639	-10.91	-10.6986	-12.102	-11.1422	-7.9162	-8.51865	-6.96167	-11.469	-12.5601	-9.8278	-10.5403	-10.4112	-15.006	-15.4917	-9.73564	-5.8927
375.5	672.5	11.1431	4.56405	-5.18188	-13.6871	-10.336	-8.50762	-9.71146	-8.71067	-11.3539	-11.0275	-10.7795	-10.4305	-6.00032	-11.6159	-8.02079	-12.007	-7.33706	-8.42901	-10.0136	-8.9988	-10.2597	-9.2568	-8.52995	-8.70202	-7.53883	-8.02487	-13.4851	-12.6425	-12.5486	-11.8645	-7.80346	-6.89242	-7.83295	-11.4738	-10.93	-11.2443	-7.21274	-6.63008	-5.21099	-9.28546	-9.83857	-7.35797	-10.3036	-8.3692	-10.2198	-14.1326	-9.84812	-10.5483
376.5	672.5	11.1431	4.56405	-5.04415	-10.6386	-10.0011	-9.74067	-10.7217	-9.6001	-12.5783	-10.3237	-10.6537	-10.0358	-8.6326	-12.9506	-9.07063	-12.9276	-7.93043	-11.9987	-11.8949	-9.84638	-14.0052	-11.0562	-11.4432	-11.0148	-9.80808	-10.6729	-10.7942	-10.443	-9.93873	-8.24205	-5.99489	-7.46104	-7.01198	-8.74204	-8.74162	-9.86784	-9.95684	-4.24736	-6.27145	-9.69539	-8.48605	-7.78414	-11.0731	-8.40204	-8.52195	-11.8145	-11.9084	-15.0242
377.5	672.5	11.1432	4.56405	-6.53806	-8.52349	-9.49998	-10.9446	-12.4044	-10.0354	-11.9349	-11.532	-10.9237	-10.1394	-10.3814	-12.6632	-14.1025	-10.7129	-10.2697	-10.4601	-13.1692	-9.50105	-16.1701	-10.7881	-11.2233	-10.8537	-8.69161	-11.1632	-9.65284	-9.79677	-8.55613	-10.9017	-5.11716	-9.55331	-6.30056	-7.73104	-7.65192	-8.91377	-11.1866	-3.48307	-9.04872	-9.699	-9.20328	-10.5954	-8.13151	-9.16627	-8.6468	-11.9988	-11.1047	-15.6014
378.5	672.5	11.1433	4.56405	-8.68035	-8.92016	-9.09896	-11.5233	-14.3366	-10.4709	-11.1342	-15.3232	-10.5393	-10.6919	-9.33848	-10.7569	-15.4799	-8.39428	-13.1558	-10.6437	-12.723	-7.29956	-14.4963	-10.1414	-11.2747	-10.2127	-9.2965	-13.2564	-11.6924	-10.5501	-10.0351	-9.55388	-6.38347	-10.3699	-6.37422	-8.9741	-8.53373	-8.1305	-10.899	-4.71245	-8.8843	-7.63456	-7.84849	-10.0362	-6.50733	-8.26739	-9.31284	-12.2448	-8.24146	-13.6172
379.5	672.5	11.1434	4.56405	-5.35587	-9.81202	-7.59153	-12.902	-14.0578	-11.4073	-11.326	-16.2197	-10.368	-12.1918	-7.91888	-9.56868	-11.4393	-8.49563	-17.4045	-10.9414	-12.8893	-9.89386	-12.6019	-10.787	-11.3599	-11.472	-11.4969	-14.7626	-14.1282	-10.1091	-10.4526	-9.32572	-9.19743	-8.67325	-8.84839	-10.599	-9.23667	-7.5545	-12.3387	-7.89364	-8.21271	-4.92052	-7.52561	-10.4806	-7.84489	-8.52791	-9.59397	-10.9434	-8.33133	-10.067
380.5	672.5	11.1435	4.56405	-6.06226	-9.31576	-5.81198	-11.6121	-13.6353	-12.3443	-11.4998	-14.1513	-11.1933	-12.2515	-7.34235	-9.80097	-9.4237	-10.2776	-15.2557	-10.9795	-13.2489	-11.0646	-12.5266	-11.5553	-11.3751	-12.4239	-9.40892	-14.8499	-13.8418	-9.18526	-8.04134	-11.426	-10.4781	-8.68658	-10.2942	-11.755	-8.72759	-4.64755	-11.0036	-9.58469	-7.64225	-3.96852	-9.34997	-11.7344	-10.2459	-10.5161	-9.41922	-11.1224	-10.3585	-9.65896
373.5	673.5	11.1429	4.56397	-6.41408	-10.5832	-7.5449	-8.79084	-8.43932	-12.1984	-14.0004	-10.7644	-10.2596	-9.37889	-8.63945	-7.65456	-10.4022	-8.99123	-4.46285	-8.90963	-12.1091	-9.99167	-8.82221	-10.9339	-10.6647	-8.94996	-8.4666	-5.93508	-9.5606	-11.5048	-8.38836	-9.22133	-8.50036	-13.2086	-13.678	-14.1815	-6.8227	-10.5614	-13.9023	-8.67636	-10.0375	-9.36834	-10.9845	-10.1519	-8.76417	-11.9932	-20.4369	-10.8833	-9.66746	-6.16296
374.5	673.5	11.143	4.56397	-5.97068	-7.73262	-7.90653	-10.175	-10.4613	-11.7082	-14.3584	-11.4379	-10.771	-11.9511	-7.47251	-9.30882	-11.1827	-11.0073	-6.54122	-6.16544	-9.9033	-7.97914	-7.17511	-7.64351	-9.50123	-6.96396	-8.93975	-5.28442	-12.3358	-14.9605	-9.8595	-10.7985	-9.78979	-9.9964	-12.49	-13.5484	-13.1887	-11.5646	-11.79	-10.1598	-8.38835	-10.6737	-12.1507	-10.4098	-10.0514	-11.8837	-17.232	-13.4502	-9.02345	-9.04401
375.5	673.5	11.143	4.56396	-5.38804	-9.61039	-8.76687	-9.93714	-10.9898	-10.9763	-12.9376	-12.7136	-12.037	-11.6979	-6.65932	-9.81068	-9.43689	-13.0576	-6.24593	-7.64062	-8.26272	-8.97241	-9.08808	-6.67865	-9.04757	-7.93566	-9.33916	-6.75231	-13.6777	-12.6074	-11.4222	-10.8445	-7.76272	-6.84525	-8.71467	-12.4505	-13.1866	-11.854	-9.46978	-7.05539	-5.85146	-8.29218	-9.45189	-7.97298	-11.4036	-8.90344	-13.7222	-11.412	-8.84024	-10.9483
376.5	673.5	11.1431	4.56396	-4.5792	-8.75682	-9.07856	-10.8438	-11.9674	-11.5804	-11.7279	-12.542	-11.9667	-9.46903	-8.66399	-12.5257	-11.9657	-14.0454	-5.75601	-11.2174	-9.67847	-8.6359	-11.4432	-8.2911	-9.12154	-11.2225	-11.1664	-9.08998	-13.0301	-9.66945	-10.4466	-8.93371	-5.37445	-5.96159	-7.30333	-9.01011	-8.65006	-8.80928	-8.88651	-5.08905	-6.5882	-11.0318	-6.27906	-8.05764	-12.4466	-7.76369	-12.2136	-10.8911	-10.4983	-15.569
377.5	673.5	11.1432	4.56396	-6.88322	-7.55386	-9.24657	-10.5436	-12.8598	-10.5179	-10.5415	-11.7713	-11.7495	-8.66591	-10.8204	-11.1187	-16.3637	-11.6642	-8.26146	-11.4332	-12.817	-9.63385	-11.0287	-8.61316	-8.91557	-12.5552	-10.1938	-10.9695	-11.944	-7.94088	-8.87509	-8.99368	-4.06671	-9.76311	-5.71661	-7.41737	-7.50004	-8.24351	-8.71462	-3.95371	-8.65674	-10.4017	-6.48263	-9.48399	-8.52012	-8.28515	-10.8598	-10.0673	-10.7506	-17.9292
378.5	673.5	11.1433	4.56396	-9.05389	-8.10044	-8.64585	-10.0768	-13.403	-9.42989	-10.8375	-15.7832	-12.0401	-10.0048	-8.73866	-9.00007	-13.7588	-7.76929	-10.6099	-11.6366	-13.5891	-8.21577	-10.9999	-8.67451	-10.6382	-13.3413	-10.8922	-12.86	-13.2834	-9.36492	-9.31405	-7.61107	-4.82651	-13.9698	-6.34048	-7.44669	-9.37006	-8.05832	-9.56369	-3.7253	-8.68824	-7.54021	-8.28549	-8.49938	-6.3376	-8.78202	-9.52326	-11.793	-7.61395	-13.1022
379.5	673.5	11.1434	4.56396	-5.40449	-8.49207	-7.02198	-10.8025	-11.4644	-10.6487	-11.325	-15.4994	-11.5635	-11.9502	-6.53672	-9.30829	-10.2722	-7.50563	-15.749	-11.8942	-13.9274	-10.1433	-11.843	-10.4292	-12.0263	-15.3535	-12.3862	-14.6642	-14.2384	-10.8269	-11.8882	-8.65707	-8.04899	-12.1914	-9.28384	-8.43701	-10.2058	-6.24084	-11.1377	-5.60126	-8.72287	-5.62314	-8.3735	-8.30779	-7.98597	-10.072	-9.63727	-12.1854	-7.78192	-9.69055
380.5	673.5	11.1435	4.56396	-5.57059	-9.27796	-6.43104	-11.4593	-11.0681	-12.2993	-11.6362	-12.9345	-11.4311	-12.4182	-6.23263	-9.60327	-9.15555	-11.3078	-16.454	-12.5434	-15.4642	-12.6623	-13.7757	-12.3896	-11.0575	-14.7613	-9.13044	-14.5317	-12.8464	-9.44773	-10.2032	-12.4085	-10.2255	-10.7605	-11.3007	-9.5266	-8.14993	-4.97743	-11.9164	-7.11197	-8.57922	-5.39197	-7.86467	-9.88078	-10.0649	-11.2985	-10.3352	-11.2187	-11.7392	-8.75538
374.5	674.5	11.143	4.56388	-9.4828	-8.00252	-7.78376	-10.8365	-12.5433	-13.9051	-14.6148	-11.1259	-11.2947	-11.3287	-9.50952	-9.71407	-10.9005	-11.5358	-6.03813	-7.91279	-9.81434	-7.2448	-9.29121	-7.79808	-10.2466	-7.88929	-7.02459	-5.84374	-11.4655	-14.6468	-6.33057	-7.16646	-11.7137	-12.4161	-13.4022	-13.242	-12.8217	-11.544	-13.5953	-13.2242	-12.33	-12.5379	-14.0074	-11.9802	-10.9927	-9.78767	-13.9421	-11.2191	-9.78149	-8.45848
375.5	674.5	11.143	4.56387	-6.7608	-8.16783	-9.5029	-12.4539	-13.3739	-14.626	-15.0142	-12.367	-11.755	-12.7125	-7.25591	-9.16074	-11.6349	-13.8413	-6.09856	-7.3352	-7.64734	-9.57811	-8.49718	-7.33671	-9.86875	-8.04549	-10.3495	-7.90465	-11.9725	-12.3093	-10.4718	-9.02472	-9.09539	-8.34009	-10.5745	-10.8434	-11.296	-8.78073	-10.3922	-7.18321	-8.9549	-10.3802	-9.87918	-9.90106	-13.2735	-8.24245	-12.1591	-9.5745	-8.28103	-9.64367
376.5	674.5	11.1431	4.56387	-5.13549	-7.77597	-10.7547	-11.4685	-13.7147	-14.365	-12.6164	-13.4222	-10.762	-9.7435	-6.90631	-12.0742	-12.6788	-14.565	-5.57129	-9.57821	-6.98669	-9.09661	-6.58879	-7.12005	-9.1851	-11.1656	-9.5925	-10.2103	-10.2866	-9.92197	-11.852	-8.36651	-6.39009	-6.33687	-8.32209	-8.74008	-7.65633	-8.44071	-6.24936	-5.56832	-7.98212	-11.3697	-5.52054	-7.84345	-13.5954	-6.83752	-11.9732	-11.2117	-8.68744	-13.0916
377.5	674.5	11.1432	4.56387	-6.88298	-7.30967	-8.65933	-9.71668	-13.3929	-11.4018	-11.4186	-12.8351	-10.9534	-7.85828	-8.29059	-10.1191	-12.4902	-12.0877	-8.08057	-11.4939	-11.1073	-11.9689	-5.80956	-7.71667	-8.85739	-12.9675	-8.52516	-11.8455	-7.91376	-6.76302	-9.01376	-6.47336	-5.33636	-6.97526	-5.90688	-8.02676	-7.58108	-9.43	-4.95473	-5.74522	-8.33966	-10.1143	-5.18714	-7.73339	-9.95252	-6.69351	-13.0744	-10.4163	-9.61507	-15.8233
378.5	674.5	11.1433	4.56387	-8.10389	-7.29836	-6.96363	-10.5536	-12.6996	-10.2475	-11.5576	-14.3003	-12.4121	-10.3824	-9.0772	-7.42558	-10.9044	-9.46901	-11.3177	-13.1684	-12.1242	-11.8243	-7.86394	-9.04233	-10.8902	-13.2127	-11.2076	-12.4595	-7.84324	-6.8411	-7.92364	-6.21706	-5.88367	-10.7267	-7.06062	-8.31619	-9.80493	-8.31786	-8.38716	-4.29092	-7.73428	-7.77517	-7.31273	-8.38002	-6.96559	-6.96981	-9.95108	-11.3405	-7.3103	-12.8624
379.5	674.5	11.1434	4.56387	-6.5665	-7.06018	-5.95667	-10.3138	-11.357	-11.1872	-9.66759	-13.5945	-13.5182	-12.5376	-8.25118	-7.11097	-7.5824	-8.48424	-15.7862	-12.8141	-11.5939	-13.1218	-12.4981	-11.5731	-14.4351	-14.7457	-13.0444	-13.1907	-11.3988	-8.85732	-10.259	-8.58353	-8.43954	-12.6633	-10.4374	-8.87831	-9.60532	-5.88795	-11.8551	-4.94944	-8.26812	-8.02772	-8.76287	-8.20144	-8.5238	-7.60767	-9.5004	-11.6026	-7.4226	-10.3082
380.5	674.5	11.1435	4.56387	-5.92573	-7.43783	-5.98333	-11.0371	-11.8932	-12.1624	-10.2653	-10.9612	-15.0027	-12.4968	-7.60408	-7.54902	-6.38881	-10.5903	-16.4544	-13.8144	-16.7008	-15.5592	-15.0918	-12.8372	-13.7843	-15.7582	-10.1026	-12.4445	-13.0726	-8.21373	-13.4778	-12.4833	-10.4244	-11.3872	-12.6616	-9.55006	-7.79394	-5.65372	-11.341	-6.51387	-8.9662	-10.146	-7.82819	-8.56158	-12.3034	-9.7468	-12.0482	-11.11	-10.2518	-9.43186
379.5	675.5	11.1434	4.56378	-5.46367	-7.2379	-7.04219	-12.0952	-10.0663	-12.5718	-9.97701	-13.8402	-13.4384	-12.6514	-10.9997	-7.4251	-7.4154	-9.19785	-14.3272	-14.573	-9.79121	-12.0236	-10.2948	-13.4526	-16.7676	-14.3918	-15.3737	-13.1749	-11.427	-6.62742	-8.3842	-8.8483	-10.2445	-9.7525	-9.6318	-11.0527	-10.4917	-4.94644	-12.3323	-7.83808	-8.00718	-9.30972	-8.9375	-8.19427	-7.99846	-7.65136	-10.2958	-9.20361	-8.01711	-11.0761
380.5	675.5	11.1435	4.56378	-5.49718	-7.79008	-7.64817	-11.1035	-12.9653	-13.9465	-9.23263	-10.2695	-13.472	-11.3136	-10.0487	-6.94075	-5.63605	-8.83255	-15.6314	-15.1592	-13.6687	-15.8619	-13.9114	-13.9282	-16.3923	-16.4423	-13.513	-12.9529	-15.5653	-7.37811	-11.9861	-13.9669	-9.9265	-11.6787	-11.2002	-11.3412	-9.68809	-5.3306	-11.8845	-10.415	-10.4298	-13.0775	-9.58871	-7.67345	-10.684	-9.88333	-12.828	-10.0061	-9.71569	-11.4487
471.5	684.5	11.1516	4.56288	-6.39816	-8.14563	-8.8945	-12.8358	-7.24287	-7.9862	-8.33989	-9.90486	-11.8896	-9.80074	-7.71438	-8.8787	-12.62	-10.0308	-9.23071	-11.1776	-10.3345	-10.6209	-10.1107	-12.4717	-10.8193	-13.2429	-8.61885	-8.86997	-8.47298	-7.61756	-7.88934	-8.28029	-10.9417	-11.7364	-8.55334	-4.01301	-8.3007	-8.48486	-9.44634	-6.56041	-11.0573	-8.10716	-10.148	-12.6163	-9.80958	-11.8853	-11.6506	-10.4625	-9.88744	-11.446
469.5	685.5	11.1514	4.56279	-4.78363	-7.59721	-9.35864	-7.79277	-6.20796	-10.251	-10.0806	-14.476	-13.6278	-10.162	-9.20222	-8.38463	-9.19916	-11.3595	-11.6665	-10.9231	-13.7592	-11.6489	-11.7315	-11.5004	-13.2875	-9.6587	-8.64414	-8.53841	-10.4789	-10.5725	-9.53052	-9.55126	-12.0715	-9.24442	-11.49	-5.85111	-9.10696	-10.081	-8.432	-7.04675	-7.05643	-7.55096	-6.95777	-10.7033	-12.4028	-9.05293	-8.88114	-10.0197	-10.073	-8.54006
470.5	685.5	11.1515	4.56279	-5.66997	-9.13348	-10.2468	-8.7475	-7.52704	-9.3953	-9.76803	-12.367	-11.7309	-10.6596	-8.51698	-9.12956	-9.94743	-12.2476	-10.9444	-10.8647	-11.6902	-11.9605	-11.8275	-12.6652	-15.827	-11.1567	-9.73948	-8.30824	-9.74784	-10.177	-8.18165	-9.78315	-10.9629	-8.94867	-9.81688	-3.41082	-7.71696	-9.79343	-8.4572	-5.71262	-9.34702	-8.61063	-7.70965	-10.9767	-11.5438	-10.8724	-9.26136	-9.2028	-9.82577	-9.58306
471.5	685.5	11.1516	4.56279	-6.64656	-9.52107	-9.84187	-11.2063	-9.86629	-8.25364	-10.7325	-11.1332	-10.6424	-10.7042	-7.51497	-10.6414	-12.5067	-13.4298	-10.3897	-11.009	-9.10514	-10.8568	-9.84187	-13.1489	-12.3069	-13.5896	-10.0363	-7.42298	-8.79099	-9.10817	-9.15948	-9.88638	-10.3043	-10.7796	-9.87266	-3.02117	-6.78752	-9.82797	-9.95674	-5.66856	-10.1379	-9.07338	-9.67098	-10.7399	-11.0506	-10.0248	-10.2007	-10.1204	-11.8016	-11.6834
469.5	686.5	11.1514	4.5627	-6.35324	-9.8185	-9.88062	-9.18041	-6.9896	-8.65854	-9.10679	-14.7194	-11.0234	-13.3429	-9.19879	-9.07108	-10.3148	-9.55388	-10.9297	-10.6487	-13.3283	-12.9483	-10.2262	-13.4395	-14.0078	-8.94547	-10.1007	-10.3413	-9.88069	-11.8646	-9.37988	-10.7888	-11.1767	-9.61695	-11.0681	-5.64159	-9.01956	-11.1291	-7.23276	-6.70062	-7.68911	-8.24216	-7.12509	-10.8894	-9.91891	-10.6221	-10.5024	-11.0138	-9.81647	-6.90787
470.5	686.5	11.1515	4.5627	-8.22549	-10.4652	-10.1536	-7.6563	-10.6074	-9.34196	-10.1956	-13.7891	-9.08248	-13.5789	-8.6192	-9.08026	-10.3249	-11.009	-10.4469	-10.8854	-10.8211	-14.0133	-10.0255	-13.4989	-15.5268	-10.6717	-11.3493	-9.81637	-8.48017	-10.4497	-9.41391	-11.862	-10.4677	-9.03741	-11.0909	-3.75277	-7.37849	-10.8391	-8.44303	-5.64775	-9.17772	-8.49772	-7.32953	-9.02595	-9.71695	-11.1946	-10.212	-10.2062	-10.7616	-8.28319
471.5	686.5	11.1516	4.5627	-9.58154	-10.9513	-10.5608	-8.12248	-11.5059	-8.48929	-11.9188	-12.2028	-9.83986	-13.1671	-7.51012	-9.78344	-10.4902	-12.1356	-12.1556	-10.3888	-9.74075	-12.9875	-8.81994	-12.222	-14.1853	-12.6667	-12.9816	-7.631	-8.45108	-8.80765	-10.9796	-11.0645	-10.0259	-9.84304	-10.8767	-3.52196	-5.69759	-10.5358	-10.5662	-5.34925	-10.0044	-8.88636	-8.71771	-8.81395	-9.81077	-9.81291	-10.1659	-10.0138	-13.7561	-11.7797
472.5	686.5	11.1517	4.5627	-8.99559	-10.9565	-10.1615	-9.57197	-8.37638	-7.0212	-13.1635	-10.4807	-10.4156	-12.832	-6.81698	-9.61636	-8.52522	-10.0652	-11.1521	-11.1983	-9.44762	-10.7782	-8.26939	-11.325	-10.452	-13.3955	-9.86283	-8.55565	-11.3755	-8.54966	-12.2922	-12.0311	-10.8454	-10.9438	-10.8756	-5.58503	-6.33066	-8.33255	-12.9411	-6.30312	-9.64123	-9.41737	-11.9786	-10.8688	-10.3009	-8.43815	-9.48005	-10.47	-12.3163	-12.5753
469.5	687.5	11.1514	4.56261	-11.1168	-16.1616	-10.6022	-9.26144	-7.56256	-7.34815	-9.05778	-14.9937	-8.82792	-14.8256	-10.0123	-9.89311	-11.1493	-10.0765	-9.999	-12.1238	-11.7451	-11.4513	-10.0874	-11.1617	-11.0811	-7.03545	-8.43913	-9.71622	-9.2934	-12.293	-9.37022	-12.2221	-10.002	-10.3988	-10.0131	-6.13043	-10.9705	-11.0916	-7.76149	-6.0506	-7.46919	-7.96054	-7.95597	-9.65425	-8.96703	-12.6056	-13.4183	-11.2895	-12.7061	-7.08878
470.5	687.5	11.1515	4.56261	-11.6759	-13.4482	-10.6252	-7.3258	-12.3688	-8.44831	-9.78313	-13.4124	-7.46155	-14.968	-9.07185	-8.67052	-10.4019	-9.43748	-10.6371	-10.8974	-10.1684	-13.3817	-8.67228	-10.2499	-11.4697	-9.97354	-9.29379	-10.98	-8.50486	-9.54583	-10.933	-13.2933	-10.8464	-9.20245	-10.2796	-5.32203	-8.80293	-10.5887	-10.545	-5.85566	-7.97519	-8.43012	-7.73505	-8.06246	-7.32318	-11.6063	-13.5418	-12.0112	-14.3571	-8.59946
471.5	687.5	11.1516	4.56261	-11.4718	-11.3894	-10.7474	-7.1322	-10.5956	-8.63269	-11.5358	-12.6749	-8.76062	-12.5481	-8.56508	-8.37559	-8.99306	-8.79383	-14.5325	-10.0397	-10.3787	-13.1416	-8.13717	-9.68494	-12.4737	-11.5594	-11.197	-10.1701	-8.94739	-8.58845	-10.5699	-11.7564	-10.1634	-8.7645	-11.4386	-6.14803	-6.20241	-8.64592	-12.8851	-6.51734	-10.5848	-9.72873	-9.37828	-8.07005	-8.03215	-10.1234	-12.5399	-11.5522	-13.1173	-10.0536
472.5	687.5	11.1517	4.56261	-8.95618	-10.5205	-10.1151	-8.78758	-7.51185	-7.87833	-11.2679	-12.2977	-10.4067	-11.1708	-8.66629	-9.31933	-8.33644	-7.97922	-12.604	-9.94033	-9.88672	-10.9349	-8.53254	-9.20909	-11.1744	-11.1127	-11.2706	-10.9528	-11.6883	-8.81804	-10.6741	-13.2949	-11.3458	-8.94453	-10.5804	-8.93195	-6.81384	-7.51294	-12.3466	-7.70799	-11.2185	-11.417	-11.6083	-10.0089	-9.09848	-8.92296	-9.46197	-10.6539	-11.4686	-10.3753
470.5	688.5	11.1515	4.56252	-8.5014	-11.8489	-12.3123	-8.74584	-11.4268	-8.545	-10.6896	-10.0774	-7.52409	-13.4528	-9.39084	-9.18354	-9.79416	-10.4394	-11.8071	-10.9825	-9.95869	-10.9581	-8.42342	-7.99952	-8.21484	-8.72704	-9.31599	-9.63603	-8.61211	-7.98199	-11.0455	-13.1379	-11.8928	-7.31278	-10.8683	-6.66861	-8.80454	-9.04233	-11.8288	-7.22658	-8.78042	-8.80167	-8.23981	-9.0991	-5.40975	-9.9513	-13.5688	-13.606	-14.5334	-9.49516
471.5	688.5	11.1516	4.56252	-7.87448	-10.517	-11.6328	-8.43598	-10.0681	-8.35712	-11.3023	-10.2452	-8.40731	-10.6077	-9.94412	-9.07172	-6.88212	-8.42421	-13.4394	-10.9886	-9.97223	-9.23963	-8.11192	-7.93535	-9.31984	-9.73211	-10.3648	-10.0786	-10.843	-8.76817	-9.93291	-12.2223	-11.4119	-7.26678	-11.5128	-9.34046	-7.54045	-7.28484	-14.0879	-9.33541	-11.8271	-10.5126	-10.3356	-9.59892	-7.17402	-9.69639	-13.0241	-14.5461	-11.5432	-8.80963
341.5	749.5	11.1399	4.55719	-5.88521	-13.3767	-11.4007	-10.3405	-7.41487	-8.13927	-9.1876	-12.5796	-8.60383	-8.56794	-8.25525	-10.1052	-10.6224	-12.041	-11.3812	-7.89354	-14.349	-12.0812	-10.1499	-13.2529	-12.9334	-10.8482	-6.80823	-11.6159	-8.02816	-9.04201	-8.10797	-7.29358	-9.08533	-9.38419	-10.438	-11.8507	-9.31897	-7.81811	-8.2118	-4.86801	-8.58092	-8.45593	-9.44921	-10.5394	-11.402	-7.59946	-10.7517	-14.4314	-11.2698	-11.0938
341.5	750.5	11.1399	4.5571	-5.61145	-14.5083	-12.0943	-12.224	-9.11131	-10.5353	-10.9933	-11.768	-9.40762	-8.38882	-7.70256	-11.3586	-11.1204	-12.4052	-13.5164	-8.82277	-14.6126	-8.8463	-9.38973	-13.942	-12.952	-9.9016	-7.24358	-10.5887	-7.78136	-9.85367	-7.74192	-8.06606	-10.516	-8.12656	-8.35057	-8.13685	-8.9129	-8.93773	-7.8586	-5.20899	-6.14143	-6.65834	-9.22268	-8.21791	-13.6424	-7.91753	-11.757	-14.1671	-8.60502	-11.2433
342.5	750.5	11.14	4.5571	-5.34293	-14.2403	-12.7888	-11.5092	-10.3002	-10.442	-13.7693	-11.2788	-9.92819	-10.018	-10.1625	-10.0737	-8.97384	-11.1008	-14.98	-11.3981	-13.837	-10.1301	-10.8318	-13.4324	-12.1319	-10.6973	-9.27658	-9.84337	-8.91309	-9.26263	-9.16179	-9.08519	-10.5958	-8.60074	-7.02193	-6.78951	-10.1614	-9.54637	-7.90455	-4.31448	-7.36711	-8.57701	-8.59931	-8.16612	-10.4991	-7.89809	-10.6521	-12.486	-12.8788	-14.7095
343.5	750.5	11.1401	4.5571	-6.39872	-14.0294	-14.3688	-11.8217	-10.5113	-10.0688	-11.4421	-11.0753	-10.5677	-12.4964	-10.7887	-10.7741	-7.68203	-9.16654	-13.227	-13.2636	-12.7466	-10.7509	-11.9076	-14.2954	-14.3118	-12.3606	-11.7445	-9.70203	-10.9009	-8.34596	-10.0669	-11.7309	-11.3471	-10.1517	-8.47314	-7.5808	-12.644	-9.24758	-11.3924	-4.45495	-9.43138	-11.9103	-9.02856	-8.91001	-10.0272	-9.64081	-11.3164	-12.5678	-13.1022	-12.7039
344.5	750.5	11.1402	4.5571	-9.49952	-14.4206	-14.4091	-12.9242	-10.3465	-10.1718	-10.6111	-10.3849	-11.6122	-11.0073	-10.7093	-12.0056	-7.83263	-9.25724	-11.2454	-14.6589	-13.5369	-13.2205	-11.9148	-14.2564	-17.9107	-11.4893	-12.5787	-9.44714	-11.7753	-9.34182	-9.25754	-15.2883	-10.3603	-12.808	-11.2182	-10.4642	-14.7145	-9.60005	-14.0559	-6.59816	-10.5764	-13.7474	-10.2309	-10.6976	-10.7465	-12.4465	-11.6778	-13.1783	-10.4065	-7.2957
345.5	750.5	11.1403	4.5571	-9.43073	-16.9401	-13.0484	-13.9763	-11.1297	-10.2862	-11.3501	-10.6252	-14.5539	-10.4585	-10.6073	-10.8494	-9.30271	-10.446	-11.4269	-15.1085	-13.8291	-13.1572	-11.658	-13.5562	-14.5566	-11.9029	-12.5792	-9.53454	-11.0902	-11.7996	-9.1777	-15.1276	-9.72489	-15.1468	-11.5126	-12.7787	-13.8759	-10.2871	-11.0614	-11.2188	-10.6065	-14.0777	-10.9708	-13.2213	-11.0015	-11.5823	-9.85256	-11.3218	-9.80787	-7.10066
341.5	751.5	11.1399	4.55701	-6.23777	-15.4358	-10.9242	-12.3219	-11.0527	-14.4393	-13.376	-11.336	-13.1046	-10.5227	-8.32601	-13.0684	-11.7832	-14.1588	-12.6111	-10.1912	-11.8893	-6.88906	-7.25338	-13.3958	-9.26073	-10.9051	-8.31205	-9.86387	-9.30999	-11.4015	-7.4104	-10.8272	-13.417	-8.58289	-7.80139	-7.73779	-9.36163	-7.97787	-8.75234	-5.45988	-5.63099	-7.03464	-9.15724	-8.35431	-12.6068	-8.37129	-11.8775	-11.1074	-7.03382	-8.77163
342.5	751.5	11.14	4.55701	-6.97004	-14.447	-11.8023	-10.8288	-11.6732	-12.4036	-12.8011	-11.689	-12.9617	-10.9576	-9.77297	-10.3672	-10.0664	-12.5472	-14.3891	-11.3721	-11.1166	-8.70434	-8.98194	-12.3033	-9.76887	-11.7558	-10.1491	-10.1338	-9.20324	-10.0338	-7.20838	-11.9441	-11.4595	-8.15504	-6.58442	-5.45591	-8.69435	-8.87481	-8.1831	-3.20556	-8.25079	-7.83907	-7.15227	-8.8196	-10.3269	-7.21422	-10.3281	-9.85298	-12.2438	-12.9662
343.5	751.5	11.1401	4.55701	-9.40444	-13.5365	-13.6835	-10.4927	-10.9119	-11.1948	-10.4107	-11.3928	-13.0733	-12.9812	-11.9146	-9.85648	-7.75809	-10.7396	-13.343	-13.4208	-10.4817	-9.29199	-9.25625	-12.0258	-13.0858	-11.984	-10.7857	-11.0107	-9.64533	-8.01026	-8.9623	-14.866	-11.5991	-10.4496	-9.06511	-6.37565	-9.95677	-9.24442	-10.0376	-2.57468	-12.1881	-9.59035	-7.99365	-10.9062	-9.88133	-7.93796	-9.83598	-10.1359	-13.0391	-11.2288
344.5	751.5	11.1402	4.55701	-11.0813	-14.2051	-15.7648	-11.5894	-10.4413	-11.2656	-10.6099	-10.9015	-14.2888	-12.9418	-13.3554	-11.9752	-7.57313	-10.519	-10.918	-15.126	-11.8243	-10.8468	-9.24641	-11.657	-15.0459	-10.3439	-10.662	-10.8937	-10.2522	-8.92296	-11.1548	-16.7954	-11.4224	-12.2135	-11.6641	-10.2962	-13.3874	-10.8449	-11.9138	-4.60083	-11.9265	-11.4666	-10.8706	-14.6646	-8.54673	-10.1991	-9.57572	-9.67041	-11.4408	-6.59223
345.5	751.5	11.1403	4.55701	-9.11468	-15.1053	-14.6109	-13.6761	-10.9541	-11.0806	-11.9931	-10.9238	-17.6081	-11.8262	-11.0653	-12.0077	-9.53178	-11.5879	-11.1014	-14.7091	-14.2944	-11.8866	-9.66674	-11.3279	-13.2179	-10.7295	-11.1694	-10.8508	-10.3606	-11.5451	-10.5847	-15.3395	-9.74713	-11.6749	-10.3782	-12.6275	-16.5029	-11.6831	-10.7725	-10.6364	-11.3298	-12.6926	-11.7624	-17.0533	-7.96494	-11.8377	-9.68707	-8.72271	-12.0328	-6.86138
346.5	751.5	11.1404	4.55701	-6.50207	-14.0755	-13.0198	-13.7719	-12.4221	-9.57229	-11.2987	-10.883	-17.8585	-12.2323	-9.07511	-11.4433	-12.7094	-13.6895	-13.671	-14.3787	-13.765	-12.4398	-11.3244	-11.205	-11.9922	-13.085	-10.9778	-10.7164	-10.7449	-11.4632	-10.038	-13.1828	-10.2639	-10.745	-9.01225	-13.4472	-14.1351	-10.281	-11.4746	-11.3364	-11.5403	-10.829	-12.1919	-15.7453	-9.71965	-10.8716	-9.802	-10.0114	-14.7255	-10.7651
347.5	751.5	11.1405	4.55701	-5.7898	-12.9405	-13.2521	-12.8923	-11.4151	-8.91528	-11.4929	-11.6126	-15.6624	-13.3271	-8.39815	-11.8023	-12.8784	-13.5658	-14.5087	-13.1721	-12.1197	-13.524	-13.3695	-12.8278	-11.2082	-15.0757	-9.25103	-9.68584	-12.3259	-11.5478	-9.95407	-12.1475	-12.8924	-10.3193	-9.81959	-13.6062	-10.7602	-10.1148	-14.6708	-10.5211	-13.9822	-8.81456	-13.5179	-14.1407	-11.8495	-10.0596	-9.90034	-11.6254	-14.5783	-12.7443
348.5	751.5	11.1406	4.55701	-6.38836	-14.4879	-12.9171	-12.1219	-10.4888	-9.49922	-13.8461	-13.0122	-13.5692	-13.2576	-8.56858	-11.7683	-10.4558	-10.7012	-12.2366	-12.5269	-11.8583	-14.0299	-13.045	-13.5778	-9.26714	-12.4623	-9.15484	-9.15947	-13.1894	-10.9748	-8.50072	-11.5484	-12.616	-9.55536	-13.4002	-13.0596	-10.248	-11.7267	-14.67	-12.5744	-14.5802	-10.2176	-15.1774	-13.4651	-12.6963	-11.3188	-11.6694	-10.329	-10.5059	-12.5755
349.5	751.5	11.1407	4.55701	-8.39164	-16.0356	-11.7346	-11.5974	-10.4698	-10.5048	-15.3128	-15.0316	-11.1368	-12.8977	-10.2965	-11.6715	-9.28923	-9.90743	-11.3203	-13.183	-10.5262	-13.5188	-12.9108	-12.1389	-7.92345	-10.6347	-10.9394	-9.06472	-12.7264	-10.8577	-7.15439	-11.744	-10.3098	-8.83617	-13.874	-11.8691	-12.7603	-10.8232	-11.3492	-12.473	-12.0075	-14.5865	-19.4564	-14.5243	-13.5123	-10.0969	-12.5592	-9.96179	-9.03771	-10.7624
341.5	752.5	11.1399	4.55692	-5.0499	-13.4289	-10.9315	-12.2613	-9.05274	-11.9431	-12.356	-10.846	-12.9814	-10.5223	-7.18495	-10.8781	-10.2672	-13.4605	-10.4886	-11.2656	-10.5504	-6.83745	-6.8417	-9.45018	-8.35112	-12.9014	-7.76439	-10.4749	-11.1019	-12.0509	-8.40145	-14.9301	-12.5797	-8.54193	-9.59084	-8.86448	-10.5373	-7.04116	-10.0403	-5.39709	-7.44169	-8.62389	-10.2142	-9.98273	-13.9943	-7.91553	-12.5387	-10.0237	-8.15873	-7.9061
342.5	752.5	11.14	4.55692	-6.66743	-13.5379	-12.0954	-10.6852	-9.4765	-11.5924	-11.0015	-11.4997	-14.1293	-10.4841	-8.85692	-9.05166	-10.3934	-13.4429	-11.8044	-11.6275	-10.9671	-8.44117	-8.31751	-9.18708	-8.68103	-12.9467	-8.19726	-12.0669	-8.87212	-8.28025	-7.57376	-14.7865	-9.35592	-7.47798	-9.29674	-7.75212	-8.1499	-7.40428	-7.9975	-2.61166	-10.6437	-8.23094	-7.25629	-9.77736	-10.5752	-5.74415	-10.4871	-8.73475	-12.2504	-11.3753
343.5	752.5	11.1401	4.55692	-10.8343	-14.053	-13.3838	-10.2783	-9.47923	-11.3477	-9.45466	-12.2306	-14.5527	-10.6254	-11.9885	-9.35114	-8.71219	-12.6021	-14.2825	-13.556	-10.3421	-9.01498	-8.06452	-9.07772	-11.4264	-11.9216	-7.77211	-12.1413	-7.64361	-6.32474	-10.2451	-13.7232	-9.75023	-9.79124	-11.7298	-9.30573	-9.7088	-7.797	-8.53308	-2.04669	-9.42577	-9.83925	-7.90643	-9.99472	-8.91994	-6.76892	-8.97979	-9.04895	-11.8531	-11.7892
344.5	752.5	11.1402	4.55692	-13.3753	-14.949	-16.9233	-10.085	-10.2649	-11.3772	-10.6445	-13.0779	-13.5409	-11.637	-10.4498	-12.2415	-8.87509	-11.2396	-11.3791	-12.9467	-11.2209	-9.44698	-7.6073	-8.88303	-12.36	-10.2002	-8.30678	-12.0229	-8.23703	-7.59303	-14.2443	-12.8988	-12.0619	-10.2422	-12.5234	-10.6629	-13.6721	-8.7795	-9.77821	-4.28632	-8.98809	-12.4684	-11.4513	-11.1408	-7.32801	-10.148	-9.5002	-8.35423	-11.5291	-8.36172
345.5	752.5	11.1403	4.55692	-10.6532	-14.037	-15.982	-11.6649	-11.9047	-11.0703	-13.7605	-12.691	-14.1853	-11.6585	-8.2492	-12.3295	-10.2781	-10.8915	-10.2097	-11.738	-12.7188	-10.5168	-8.21449	-9.2176	-11.4518	-10.1842	-9.32841	-12.5126	-9.93126	-10.2343	-13.7429	-13.7108	-11.9181	-8.92296	-10.5751	-9.52206	-12.9375	-9.75719	-10.3471	-10.4789	-10.6529	-12.1438	-12.6659	-13.394	-7.74643	-13.6872	-10.6118	-9.11174	-13.0773	-8.74542
346.5	752.5	11.1404	4.55692	-6.90761	-13.4945	-12.7842	-13.2769	-13.0137	-10.3312	-12.5318	-11.9223	-14.5	-11.434	-8.73201	-11.1293	-11.0258	-13.0401	-11.2721	-13.3931	-11.9571	-12.001	-9.82811	-10.6053	-11.1482	-12.3009	-10.038	-12.2005	-10.434	-9.71933	-11.1858	-13.247	-11.1209	-8.51965	-9.35999	-9.95806	-11.2478	-10.2411	-12.3812	-13.5916	-12.5693	-10.4697	-13.4081	-16.3096	-10.725	-12.0296	-10.1532	-12.9694	-14.228	-11.6914
347.5	752.5	11.1405	4.55692	-5.16784	-12.5655	-11.6221	-12.2595	-10.3169	-10.1926	-11.7821	-12.5427	-14.0669	-12.9309	-9.4419	-11.2968	-10.5046	-15.342	-12.8442	-12.9316	-11.0122	-14.4367	-11.4521	-12.3255	-12.1694	-15.4626	-9.09869	-10.0511	-10.6237	-9.4207	-9.9199	-13.3744	-12.0633	-9.47278	-10.4486	-10.4573	-9.53684	-10.9596	-15.3304	-13.4803	-14.1374	-8.90511	-16.2791	-14.1801	-14.0848	-11.4308	-9.98731	-15.0856	-13.7469	-11.7449
348.5	752.5	11.1406	4.55692	-5.41004	-13.8032	-12.3061	-10.8579	-9.53209	-10.3936	-12.8904	-13.7336	-14.4416	-14.5044	-10.0133	-12.5629	-9.99068	-11.6046	-12.8123	-10.8774	-10.8182	-13.5952	-12.6029	-13.7179	-10.753	-13.326	-9.7554	-9.31784	-9.93378	-9.73138	-9.37361	-14.0529	-9.78763	-8.70112	-15.1401	-10.2766	-10.1548	-9.83765	-13.11	-14.5299	-12.2916	-10.5754	-16.7592	-12.2551	-15.4661	-11.0477	-10.525	-10.8109	-12.0568	-11.6013
349.5	752.5	11.1406	4.55692	-7.48709	-14.4876	-12.7412	-11.0136	-11.0618	-10.4543	-13.8731	-15.3642	-12.2985	-14.7218	-10.8853	-11.7168	-10.2585	-10.0237	-12.0762	-11.2763	-10.0215	-13.0351	-12.523	-13.1871	-8.97347	-12.4621	-12.3321	-10.0552	-10.934	-10.4872	-9.04165	-13.6566	-9.06943	-8.89166	-14.414	-9.55996	-12.3144	-10.846	-10.847	-10.6411	-10.929	-13.04	-15.8934	-14.1447	-14.096	-9.29992	-10.3912	-9.39159	-10.8388	-11.1345
350.5	752.5	11.1407	4.55692	-8.39416	-13.5921	-12.5408	-14.3565	-10.6844	-12.3667	-12.8554	-15.2082	-10.767	-13.1238	-9.84688	-10.6505	-8.80333	-10.77	-11.9869	-11.7507	-10.2701	-13.2272	-12.7153	-12.1993	-10.462	-13.3	-12.9423	-10.4026	-14.297	-9.96839	-9.58252	-14.1104	-9.97464	-9.586	-12.1652	-8.9025	-13.1472	-11.8954	-9.4906	-8.25111	-9.67218	-12.4228	-14.5026	-15.6802	-12.6757	-8.53811	-9.96629	-10.0699	-10.4293	-10.3692
341.5	753.5	11.1399	4.55684	-4.67957	-11.8012	-10.7109	-10.4962	-8.55481	-10.2495	-11.6566	-12.1601	-11.9071	-8.75396	-7.68243	-8.06975	-8.22546	-13.2478	-8.83595	-10.7423	-11.6026	-7.57538	-9.15626	-8.85929	-9.82997	-12.5954	-7.72013	-11.5737	-11.8256	-10.9868	-11.0402	-17.7423	-11.8603	-7.61003	-12.4289	-9.51801	-12.0381	-5.99885	-10.705	-5.56735	-9.14377	-8.90061	-12.4977	-10.7708	-14.8013	-6.7568	-11.573	-10.2257	-13.3035	-5.7941
342.5	753.5	11.14	4.55683	-5.79515	-13.7413	-12.1957	-10.0243	-8.52543	-10.5826	-11.0775	-12.9451	-13.7772	-9.08238	-9.29009	-7.59434	-9.48267	-14.481	-10.2704	-10.8859	-11.8152	-8.58034	-9.58687	-8.03886	-9.71249	-11.7514	-8.26603	-12.5845	-8.89687	-7.16065	-9.90859	-13.8525	-8.08447	-7.09096	-12.5251	-10.9518	-9.83872	-6.05688	-8.26096	-2.98604	-7.31574	-8.44758	-9.17156	-8.9942	-11.3341	-5.23633	-10.7488	-8.93645	-14.5884	-9.33626
343.5	753.5	11.1401	4.55683	-9.01083	-16.2218	-13.3199	-10.3563	-9.19292	-10.7997	-10.1611	-15.0043	-13.3325	-8.81503	-10.9873	-9.22677	-9.58181	-14.3537	-11.6744	-12.9561	-11.0148	-9.4387	-8.84771	-8.0941	-10.5168	-10.9449	-8.61511	-12.5524	-6.75614	-5.94625	-10.2663	-11.1617	-8.20634	-8.61272	-12.75	-13.1322	-11.719	-7.6215	-8.59747	-3.05605	-6.03252	-9.32876	-9.1548	-7.62839	-9.2395	-6.90601	-10.1681	-9.9474	-11.7127	-11.7484
344.5	753.5	11.1402	4.55683	-11.7599	-17.3515	-15.9664	-9.30518	-10.5263	-10.3913	-11.5915	-16.8975	-11.199	-9.41363	-8.08568	-13.0836	-10.9927	-11.7645	-9.71374	-10.5076	-11.2126	-9.49268	-8.47167	-8.55519	-10.5493	-10.3295	-9.29928	-12.1735	-7.2038	-7.08994	-9.48551	-10.2632	-11.149	-9.04374	-12.2364	-9.47736	-14.5589	-9.57767	-9.7186	-6.68568	-7.32328	-10.3042	-11.2653	-7.08901	-8.48106	-9.58929	-11.4614	-10.244	-11.4037	-10.8507
345.5	753.5	11.1403	4.55683	-12.6071	-16.499	-15.3536	-9.9722	-10.6001	-9.91416	-13.6124	-14.7936	-11.6206	-9.06018	-6.99909	-12.7768	-11.1247	-10.6082	-8.99705	-10.0868	-10.7359	-9.73574	-8.74773	-8.72397	-10.3459	-10.5703	-10.5322	-13.7256	-9.75826	-9.09096	-11.3845	-11.4237	-12.1619	-8.40441	-11.3352	-7.12601	-12.147	-10.6321	-10.4719	-12.8383	-9.74194	-11.2739	-12.57	-9.37168	-9.89578	-12.0306	-10.9475	-13.0221	-11.1491	-11.6525
346.5	753.5	11.1404	4.55683	-7.68579	-14.6134	-11.604	-11.0438	-11.0963	-11.1967	-13.3281	-12.8717	-14.2152	-9.70816	-7.97616	-10.6457	-10.2516	-12.1308	-9.64701	-11.9722	-10.229	-10.4551	-8.7732	-9.55785	-10.1621	-12.7082	-11.2828	-14.478	-10.8771	-9.18278	-11.3714	-12.9468	-11.3094	-8.64885	-11.5918	-7.64433	-9.71047	-11.8519	-11.8097	-14.5243	-10.6857	-11.4448	-13.7868	-16.1939	-13.1137	-11.7121	-9.72311	-16.6831	-9.71297	-11.1051
347.5	753.5	11.1405	4.55683	-4.90577	-12.0768	-10.4205	-10.9753	-9.18002	-12.1972	-12.1361	-12.7256	-14.7742	-12.6523	-9.08261	-11.0685	-10.2502	-12.4408	-11.6883	-13.1483	-10.9275	-12.5283	-9.56082	-12.0886	-11.8553	-15.9677	-10.906	-12.7593	-10.2674	-8.77264	-10.023	-14.304	-10.8052	-7.74987	-12.6118	-9.44696	-9.50735	-11.0385	-13.1546	-15.2616	-9.66871	-10.0929	-16.4386	-14.9518	-13.6416	-11.5828	-10.27	-16.7818	-9.1468	-9.16841
348.5	753.5	11.1406	4.55683	-5.83226	-11.7532	-11.8763	-10.4699	-8.5207	-11.8057	-11.6144	-13.7827	-14.1842	-15.8066	-9.24132	-13.0236	-9.99147	-9.8568	-13.924	-10.7014	-12.4106	-13.2236	-11.2533	-14.4685	-12.7855	-15.0592	-10.5739	-11.7597	-9.32564	-8.99045	-10.1626	-16.0823	-8.54186	-7.23629	-13.3073	-9.57526	-11.2669	-11.1421	-11.7552	-11.9698	-9.60293	-11.2959	-14.6433	-13.0074	-12.1118	-10.8454	-10.462	-11.3637	-9.91194	-9.06984
349.5	753.5	11.1406	4.55683	-9.82807	-12.7391	-14.0745	-11.2052	-10.3847	-11.0946	-11.3753	-15.3838	-11.7328	-14.9162	-10.7198	-9.94644	-10.8703	-9.38022	-13.5289	-10.4955	-11.881	-13.1657	-11.7553	-13.4916	-11.7216	-13.2628	-11.3426	-12.4834	-10.6792	-8.07144	-11.575	-16.7746	-7.58598	-8.46739	-11.8664	-9.39017	-12.3922	-10.524	-9.81305	-8.82547	-9.51012	-11.7781	-11.8817	-16.2517	-11.1103	-9.92019	-10.2848	-10.2299	-10.76	-10.6786
350.5	753.5	11.1407	4.55683	-8.92921	-15.3392	-13.1642	-14.3767	-11.3554	-13.0978	-12.0496	-15.4761	-10.6865	-12.7897	-9.5853	-8.63842	-9.97899	-11.81	-12.2552	-12.1477	-12.7011	-14.1388	-13.3466	-12.5908	-12.5221	-13.2481	-11.3349	-12.4124	-13.0375	-7.76412	-12.0943	-14.9075	-7.79515	-10.3889	-10.4997	-9.76171	-12.4529	-10.6775	-8.51504	-7.21549	-10.3911	-11.5846	-11.8353	-17.5163	-11.7301	-9.79578	-9.80353	-11.2083	-11.5045	-11.5398
341.5	754.5	11.1399	4.55675	-7.27398	-11.6572	-10.7331	-9.37121	-10.3399	-11.4645	-11.4684	-14.848	-11.2929	-9.77589	-9.88961	-7.06867	-7.72919	-13.6622	-7.66824	-9.86834	-12.7887	-8.80993	-11.1452	-10.3565	-11.4078	-11.9883	-8.85539	-11.0681	-11.9172	-9.7542	-12.6045	-13.5668	-10.8738	-9.16306	-13.4365	-10.624	-11.0646	-5.63551	-10.2901	-6.98643	-9.94529	-8.0301	-13.0715	-10.8273	-14.2386	-7.79118	-9.94146	-10.8349	-10.892	-4.45356
342.5	754.5	11.14	4.55674	-6.75315	-14.4511	-12.593	-9.43175	-9.76768	-9.58073	-12.1407	-18.2786	-12.7061	-9.39591	-11.6193	-7.72067	-9.38785	-14.8959	-9.78209	-11.1151	-12.1604	-9.12075	-10.4407	-10.8356	-12.0423	-11.5119	-8.3106	-9.90331	-9.76678	-8.19418	-10.9722	-11.5046	-8.47325	-8.87536	-11.9817	-14.0626	-12.0733	-6.31034	-8.44436	-4.47317	-5.54587	-7.43986	-11.4784	-8.11771	-13.516	-7.0446	-10.1303	-9.57577	-11.3621	-8.05381
343.5	754.5	11.1401	4.55674	-7.11142	-16.7434	-13.2032	-10.0908	-10.4346	-8.83081	-11.9254	-20.0926	-13.4379	-9.14537	-10.5851	-11.0888	-10.5479	-14.3218	-11.71	-13.1176	-11.4848	-9.73964	-10.1581	-10.7999	-11.1353	-12.1051	-10.1851	-10.6989	-7.44855	-7.28964	-8.01952	-9.90117	-8.03188	-8.56093	-11.7365	-17.5712	-10.4133	-9.39027	-10.2056	-4.89553	-4.6411	-7.25248	-10.807	-7.66739	-12.0597	-8.77105	-13.1604	-11.3056	-11.5416	-11.1602
344.5	754.5	11.1402	4.55674	-8.46433	-16.8656	-14.5816	-9.51335	-11.5331	-9.07833	-12.4179	-17.5745	-11.4583	-10.1246	-7.64716	-14.2186	-11.9014	-12.9704	-10.9014	-11.828	-10.7045	-9.97219	-10.017	-10.4246	-9.8656	-12.0255	-13.029	-12.3078	-7.61343	-7.33319	-7.57391	-8.7747	-10.3764	-9.41629	-11.0402	-10.8525	-10.5934	-11.3028	-11.619	-8.81457	-7.04552	-7.8532	-12.4234	-7.40624	-11.6311	-9.56008	-12.6824	-11.9278	-12.2608	-13.0464
345.5	754.5	11.1403	4.55674	-10.2756	-16.5286	-16.013	-10.0663	-11.0861	-11.2252	-12.6943	-16.0626	-11.8645	-9.21628	-7.08135	-11.5568	-10.8129	-12.2717	-9.39782	-10.7668	-9.42434	-10.279	-9.59348	-9.2797	-10.7223	-12.2534	-12.8905	-14.6306	-9.70747	-8.58396	-9.63554	-9.58353	-11.4777	-10.2425	-10.9752	-6.79682	-11.1379	-13.1336	-11.0452	-12.887	-9.61552	-9.75891	-12.7553	-9.43061	-13.1769	-9.59876	-10.0307	-12.6406	-10.6428	-13.2617
346.5	754.5	11.1404	4.55674	-7.96463	-14.3211	-11.8553	-9.437	-12.3811	-13.0132	-12.3781	-15.6803	-15.1958	-9.6907	-7.16465	-9.50303	-10.4965	-11.7043	-9.13915	-12.0547	-9.0738	-10.1632	-8.8553	-9.09041	-11.0013	-13.7599	-12.8802	-16.2429	-11.0077	-9.78754	-11.3237	-11.9768	-11.2556	-10.155	-13.7287	-7.42589	-9.80597	-12.8797	-10.8291	-12.718	-10.0713	-9.92295	-12.144	-16.3577	-14.5736	-10.6614	-9.79997	-13.1988	-8.02152	-9.80562
347.5	754.5	11.1405	4.55674	-5.21946	-11.8864	-10.1308	-9.77967	-10.8752	-12.3378	-10.8355	-14.5298	-15.8012	-12.481	-8.02218	-10.3405	-11.8567	-9.0881	-11.1798	-13.9089	-10.7492	-10.9873	-9.29453	-11.5898	-12.1357	-16.0988	-12.6286	-15.0685	-10.7715	-9.70518	-10.0361	-14.6258	-11.6053	-8.93041	-13.3357	-9.81552	-11.0243	-11.0736	-11.4244	-11.5242	-9.06937	-10.2633	-12.5934	-14.8593	-11.6366	-11.3576	-11.5	-13.6786	-6.36255	-7.71512
348.5	754.5	11.1406	4.55674	-6.49037	-11.3709	-11.8257	-10.4833	-9.14391	-10.9623	-10.1918	-14.1127	-13.0499	-15.2919	-8.30173	-10.5711	-10.7272	-8.0335	-16.0265	-12.2547	-13.3213	-12.5283	-10.9402	-12.5646	-14.7206	-16.5179	-11.8572	-13.7259	-11.1092	-9.15823	-10.1607	-16.376	-9.39116	-8.42085	-11.4356	-10.4887	-10.9924	-9.74786	-11.4295	-9.37782	-9.18332	-11.8065	-12.2537	-14.5733	-10.0795	-11.6741	-13.0183	-11.729	-7.20695	-7.81517
349.5	754.5	11.1406	4.55674	-9.0208	-12.3749	-13.9704	-12.8534	-10.6506	-10.4507	-9.65027	-15.7464	-12.6062	-12.5527	-10.0593	-7.41411	-11.1863	-8.75145	-15.5559	-11.9911	-12.1363	-14.2994	-10.4057	-11.0659	-15.0653	-13.5724	-11.3228	-14.6306	-12.7381	-8.30019	-12.953	-14.7222	-7.97892	-9.5204	-10.4154	-10.5652	-9.49249	-9.27555	-9.45573	-8.23375	-9.68869	-12.0743	-10.8618	-14.8966	-9.82127	-10.8286	-12.4986	-10.9287	-9.42062	-10.8187
350.5	754.5	11.1407	4.55674	-8.45078	-12.8848	-12.8939	-14.3433	-10.3109	-12.4452	-11.3767	-17.1012	-12.4009	-10.8983	-8.40297	-7.77511	-10.2038	-13.0332	-12.625	-13.8035	-12.3384	-15.464	-11.2406	-11.5718	-15.3159	-12.5896	-10.1492	-13.4346	-13.745	-8.35981	-12.4079	-13.9619	-7.61435	-11.4996	-10.0973	-11.478	-9.55718	-10.9423	-7.58855	-7.88146	-10.7306	-10.6719	-11.0384	-14.4216	-10.4364	-9.48428	-10.9326	-11.3085	-11.3325	-12.7886
341.5	755.5	11.1399	4.55666	-9.73228	-12.1906	-11.0795	-10.079	-8.90631	-12.1904	-11.2697	-14.7899	-12.8299	-13.4136	-9.20005	-7.38482	-9.54046	-14.0462	-6.33269	-11.503	-12.0174	-10.5206	-9.3217	-10.5255	-11.5024	-11.759	-9.31099	-9.91414	-11.074	-10.406	-9.6443	-11.8422	-11.0298	-12.3769	-12.9257	-12.4743	-11.978	-6.38066	-10.6713	-10.0805	-10.4616	-7.35107	-13.1527	-10.5337	-11.9301	-10.3005	-10.3103	-10.2726	-7.6409	-6.53555
342.5	755.5	11.14	4.55666	-7.55211	-14.0639	-13.8513	-10.3806	-9.13746	-8.73696	-13.0055	-15.451	-14.6824	-11.3592	-13.1143	-8.36659	-11.1227	-15.2312	-9.40547	-13.0478	-12.314	-9.23777	-9.65783	-14.4435	-12.5686	-11.0934	-8.68754	-8.76043	-9.75928	-10.2035	-10.4085	-11.1168	-9.93488	-13.3241	-12.4521	-15.3362	-12.0737	-8.91867	-8.62912	-7.14932	-6.46361	-7.07699	-11.4933	-8.22103	-14.6694	-10.8984	-9.82195	-10.4299	-8.93054	-8.15934
343.5	755.5	11.1401	4.55665	-6.13371	-14.4093	-13.6644	-9.9096	-10.6953	-7.64755	-14.2087	-16.1472	-15.6043	-11.0689	-10.6695	-11.3371	-11.8838	-13.5674	-13.4862	-14.1037	-12.0056	-8.69713	-10.2991	-14.5694	-13.5873	-12.2195	-8.49026	-10.1235	-9.06854	-9.51671	-8.32063	-11.0403	-9.22639	-13.2817	-12.4719	-12.252	-9.58328	-12.1904	-9.66696	-6.26735	-4.62604	-7.04045	-11.2589	-9.02125	-14.0325	-11.913	-11.8387	-12.078	-10.9878	-9.40105
344.5	755.5	11.1402	4.55665	-7.33275	-13.6851	-14.4338	-10.3547	-11.2381	-7.62001	-12.8937	-14.5374	-12.6523	-12.1705	-8.22169	-13.4461	-11.3364	-12.497	-13.065	-13.1105	-10.3627	-9.08301	-10.277	-11.3886	-10.8129	-13.6594	-8.85167	-12.7139	-10.2616	-8.92107	-8.30557	-10.2711	-10.8386	-12.509	-10.4263	-10.3962	-8.78121	-12.7558	-10.4307	-7.04668	-6.92594	-7.90627	-12.8962	-9.69555	-14.1019	-11.2451	-10.7428	-9.93603	-12.0755	-10.6441
345.5	755.5	11.1403	4.55665	-9.22767	-13.1917	-16.52	-11.9133	-11.446	-9.65202	-12.1699	-14.9906	-12.8583	-10.4073	-8.22158	-10.44	-10.1096	-13.4253	-10.245	-11.6942	-8.68296	-9.82904	-10.0346	-9.71807	-11.7567	-13.2823	-9.14213	-14.9647	-10.6385	-8.89566	-10.1099	-10.0592	-13.1127	-12.2259	-10.6716	-8.01218	-9.57495	-13.4863	-10.9998	-8.93093	-9.97085	-8.71186	-13.1339	-11.723	-14.5779	-10.1867	-9.64624	-8.72677	-11.3262	-11.0279
346.5	755.5	11.1404	4.55665	-7.92091	-13.6577	-12.9422	-10.3998	-12.2729	-11.8763	-11.0072	-17.6116	-13.5448	-10.5137	-7.74562	-9.36945	-11.0165	-10.4333	-8.93613	-12.0133	-8.61321	-9.75705	-9.79793	-9.78509	-13.29	-12.7504	-10.2829	-16.2351	-10.3306	-10.6029	-12.0845	-12.4467	-13.8132	-10.6345	-13.3427	-7.98211	-10.7112	-12.7262	-11.1214	-10.6397	-9.44835	-8.50745	-12.1539	-14.7336	-13.6422	-10.574	-10.738	-9.63834	-8.49657	-10.5816
347.5	755.5	11.1405	4.55665	-5.99279	-13.6867	-11.5713	-9.63782	-11.1181	-11.0416	-8.7215	-18.3543	-13.7813	-11.842	-8.33482	-10.6776	-11.811	-7.74488	-10.3819	-14.2087	-10.4515	-9.90009	-10.1246	-11.3059	-15.2959	-14.1032	-12.4858	-16.8772	-10.507	-12.365	-10.7468	-15.6698	-13.4505	-8.99723	-14.2306	-8.76142	-12.4352	-11.223	-11.2231	-9.64679	-8.86396	-9.65716	-12.4933	-13.0046	-11.5213	-12.2683	-13.9327	-11.5059	-6.06427	-8.8465
348.5	755.5	11.1406	4.55665	-6.12934	-13.6404	-12.5803	-10.5357	-9.47927	-9.16664	-8.5243	-16.4014	-12.5484	-12.0612	-9.33235	-8.50719	-10.2225	-8.07575	-15.9695	-14.6999	-11.4507	-11.1353	-11.0146	-10.1324	-15.9658	-16.6568	-13.3755	-14.1075	-11.6138	-12.1485	-10.2688	-16.5575	-12.5471	-9.23646	-12.5043	-9.35293	-11.3255	-10.1937	-11.4227	-7.86311	-9.37056	-12.4448	-13.4609	-13.375	-10.8281	-13.8828	-16.5183	-12.9197	-6.68032	-9.12685
349.5	755.5	11.1406	4.55665	-6.95768	-14.1516	-13.6277	-14.356	-10.0322	-9.36385	-9.01034	-18.1204	-13.8841	-10.2355	-11.3986	-6.94375	-11.6445	-9.50238	-15.2491	-14.6751	-9.87873	-12.9422	-9.61459	-9.52838	-15.3343	-14.2838	-11.0873	-13.1319	-14.4691	-11.7643	-13.7148	-13.8764	-11.4477	-10.2458	-11.7302	-10.6617	-9.0654	-10.354	-9.92657	-7.047	-10.1199	-12.3399	-13.6273	-11.8672	-11.3768	-12.7559	-14.7214	-12.9489	-9.21002	-11.4266
350.5	755.5	11.1407	4.55665	-7.56481	-13.386	-13.9857	-15.4845	-8.20619	-10.5376	-11.928	-19.6686	-14.5979	-9.63108	-9.6457	-9.10857	-10.873	-12.8584	-11.152	-15.0541	-9.69596	-13.1495	-9.49103	-10.7109	-13.8807	-12.4266	-9.011	-13.3558	-16.1018	-12.103	-11.9037	-12.923	-11.4548	-12.5782	-11.2686	-13.2298	-9.4349	-10.7295	-7.79095	-7.50584	-10.4485	-9.90695	-13.3361	-10.6042	-11.6807	-8.97056	-11.8564	-12.2786	-11.3244	-12.9744
341.5	756.5	11.1399	4.55657	-9.26959	-13.0189	-10.1703	-11.9402	-7.10884	-9.4816	-11.3756	-13.6204	-12.6661	-16.8878	-10.3939	-8.38557	-10.5913	-13.1875	-5.35817	-12.3486	-10.664	-10.3939	-8.26688	-7.00434	-10.4971	-10.3306	-6.96675	-8.73754	-11.2114	-12.9381	-6.67171	-12.1407	-13.1561	-10.9684	-11.1225	-14.0672	-12.6439	-7.73385	-10.6209	-10.6972	-12.1735	-8.98638	-12.4341	-10.4901	-12.8157	-12.0102	-12.3964	-9.8902	-8.03467	-8.43173
342.5	756.5	11.14	4.55657	-6.81507	-12.9927	-12.9806	-11.9951	-8.0169	-8.04095	-12.5578	-12.3631	-14.5071	-13.146	-13.5457	-8.03034	-10.3418	-14.0525	-9.03587	-15.5512	-11.1128	-9.31295	-8.89842	-11.5782	-10.7929	-9.81448	-8.79329	-7.90791	-9.71455	-10.8955	-8.74719	-11.088	-11.8752	-11.7068	-11.0989	-15.1476	-13.0464	-11.7581	-8.46912	-8.56084	-9.2959	-8.57012	-11.1531	-9.70227	-14.8004	-13.5609	-11.907	-12.5004	-9.81118	-7.20404
343.5	756.5	11.1401	4.55656	-5.85538	-12.8175	-14.7609	-10.3103	-9.81577	-8.30876	-13.0754	-13.035	-15.5094	-13.3145	-9.99912	-7.83344	-8.20121	-12.5299	-14.5585	-13.4406	-11.0681	-9.42213	-10.1616	-12.037	-13.7443	-10.4565	-7.31882	-8.48781	-9.81355	-9.81974	-7.73281	-11.6996	-10.8689	-13.158	-10.2075	-11.197	-9.99646	-13.6472	-7.73721	-7.09671	-6.0712	-8.51374	-11.8231	-10.7074	-11.7448	-13.9764	-11.6429	-12.5012	-10.094	-7.1642
344.5	756.5	11.1402	4.55656	-7.4852	-12.2822	-15.2447	-12.2106	-9.65573	-7.83969	-11.3562	-13.8898	-14.1678	-14.3268	-8.90982	-8.96331	-8.82176	-10.9974	-14.2658	-11.0149	-10.1053	-9.93235	-10.0701	-9.87337	-12.9465	-11.2869	-6.19406	-11.3294	-11.4185	-9.29882	-7.37404	-12.4541	-12.0496	-13.2427	-9.42474	-9.77198	-8.27301	-12.5055	-8.17145	-6.49227	-6.944	-8.34007	-12.8939	-10.7075	-12.9517	-13.2486	-10.5695	-8.55124	-9.41406	-8.07504
345.5	756.5	11.1403	4.55656	-9.35147	-11.9935	-16.0984	-11.5147	-10.2296	-8.35737	-11.2502	-14.3618	-15.12	-10.9831	-9.97089	-10.1195	-9.80684	-10.5233	-11.0689	-9.36498	-8.62928	-9.70868	-10.032	-9.69853	-11.8475	-10.6172	-6.73365	-14.0139	-11.9415	-8.89539	-9.00828	-12.5305	-12.8773	-12.7468	-10.3522	-9.05215	-8.50533	-11.6432	-9.58176	-7.18353	-9.79072	-7.89612	-12.5747	-10.1858	-15.9308	-11.9248	-10.1477	-6.88715	-10.3354	-8.40673
346.5	756.5	11.1404	4.55656	-8.12412	-13.5403	-14.1744	-11.6749	-10.6422	-11.3822	-10.0463	-13.9243	-13.6233	-9.71609	-10.1096	-11.4122	-11.5904	-9.17613	-9.41022	-9.92696	-8.71126	-9.29752	-9.57612	-10.4733	-12.4851	-10.1528	-8.6661	-15.1064	-10.8682	-10.0333	-13.1281	-14.261	-12.7998	-10.2394	-13.6287	-8.55021	-10.6674	-11.2615	-11.9108	-8.57016	-10.2519	-7.98449	-12.267	-11.1663	-15.499	-11.7483	-11.5965	-7.40139	-9.34929	-9.84635
347.5	756.5	11.1405	4.55656	-6.36774	-15.1815	-13.2011	-10.8654	-9.94836	-11.6838	-7.8683	-15.8481	-11.9093	-10.3232	-9.07166	-12.6243	-12.5423	-7.97535	-10.4304	-13.4718	-9.94641	-9.35418	-9.67425	-11.3685	-14.3173	-11.993	-12.0766	-15.7737	-10.0664	-14.6629	-12.0874	-16.5905	-13.4401	-7.42861	-14.5218	-8.45877	-13.71	-11.2771	-11.7855	-9.13461	-9.4151	-9.8805	-13.2125	-11.808	-14.0059	-14.314	-16.4576	-10.0761	-7.46036	-10.8663
348.5	756.5	11.1406	4.55656	-5.79551	-15.1779	-12.7442	-12.3974	-9.28381	-9.84817	-7.69089	-18.5031	-11.539	-10.2086	-9.35058	-9.34327	-12.2366	-9.16141	-14.898	-14.8604	-10.7096	-10.8117	-10.8984	-9.90217	-14.7863	-14.4059	-11.4838	-12.2553	-10.0573	-15.6003	-10.586	-16.7374	-13.2067	-8.16097	-13.5598	-8.91922	-12.4957	-11.0177	-10.3889	-7.84685	-9.3538	-13.2005	-14.5883	-12.4395	-13.9787	-16.5532	-17.1844	-13.8429	-7.77796	-11.2978
349.5	756.5	11.1406	4.55656	-6.33633	-14.9437	-13.2725	-15.3656	-9.91033	-10.1488	-9.11817	-17.9382	-12.6355	-10.3772	-11.5787	-9.03678	-11.9529	-10.7579	-14.6824	-11.5496	-9.98772	-12.5938	-9.95983	-9.89649	-13.929	-13.4304	-8.39516	-11.5166	-12.2993	-14.0223	-11.9161	-15.5401	-13.6568	-9.90692	-11.8749	-9.87414	-11.1826	-10.3206	-10.8327	-7.20115	-9.8559	-12.1613	-14.8224	-12.1905	-15.0121	-14.3374	-12.0712	-14.4789	-10.143	-12.5845
350.5	756.5	11.1407	4.55656	-7.04472	-14.5895	-15.0637	-14.2626	-9.28892	-9.99316	-12.586	-15.9356	-14.7703	-10.9725	-12.4192	-10.479	-10.5315	-12.0145	-10.9054	-11.1155	-8.76535	-10.8151	-9.56426	-10.3796	-12.5564	-11.6973	-7.93356	-13.638	-17.1968	-13.3945	-11.7208	-12.9966	-16.1456	-11.894	-13.1319	-11.722	-13.6752	-9.23671	-9.83544	-7.28216	-10.0261	-10.3701	-16.9955	-10.7275	-13.9956	-10.1609	-9.69827	-12.3115	-11.7815	-13.4918
342.5	757.5	11.14	4.55648	-5.68368	-12.0276	-11.8539	-11.2645	-8.96663	-8.099	-11.1987	-11.7615	-11.5631	-13.0173	-10.2103	-7.50831	-8.63869	-13.2616	-7.97234	-17.158	-10.6066	-8.93773	-8.74024	-11.1849	-10.726	-9.59331	-9.18501	-8.48998	-10.1539	-9.24359	-7.47685	-9.32086	-10.1241	-8.08698	-8.25019	-12.6483	-11.757	-11.7232	-9.20457	-8.92436	-13.5981	-10.7363	-10.3736	-11.9944	-9.88436	-15.0804	-10.4157	-13.9308	-11.3215	-6.4058
343.5	757.5	11.1401	4.55647	-6.09171	-11.5198	-11.9336	-11.2174	-9.73229	-10.0133	-11.5436	-13.8705	-13.466	-14.0032	-8.63726	-5.80705	-6.02547	-12.0938	-12.8995	-13.6431	-10.1943	-11.1486	-10.3821	-12.2851	-12.7298	-9.37123	-7.48763	-8.43988	-10.142	-8.06793	-7.84166	-10.8233	-10.1947	-9.29179	-8.09795	-10.9433	-9.71287	-12.6738	-8.47638	-8.35695	-9.45728	-10.2657	-12.4582	-13.1438	-8.76393	-13.7422	-9.54443	-9.99911	-8.44145	-6.27101
344.5	757.5	11.1402	4.55647	-8.08948	-11.5781	-13.9063	-13.6747	-8.74079	-9.90629	-11.8018	-15.2089	-16.6241	-13.9063	-9.29021	-6.91567	-7.08635	-9.00378	-13.1918	-11.2369	-9.62399	-12.3097	-10.6866	-9.48743	-12.178	-9.08749	-5.86577	-9.95636	-11.7441	-7.9229	-6.80062	-13.6051	-11.6846	-9.04166	-8.1799	-10.7035	-8.33821	-11.8191	-8.41936	-7.24368	-8.57705	-8.49026	-13.1773	-12.1462	-10.919	-13.1155	-10.8043	-7.50971	-7.16184	-7.21261
345.5	757.5	11.1403	4.55647	-8.45912	-12.4344	-16.7078	-11.4643	-9.63405	-10.0658	-12.9682	-14.4155	-17.9539	-11.8952	-10.7471	-9.95007	-8.44765	-8.05694	-11.2384	-8.37323	-8.93197	-11.7195	-10.1311	-9.87653	-10.5519	-8.72254	-6.86181	-12.6359	-12.4036	-7.24246	-8.1311	-13.9162	-11.4476	-11.355	-10.0438	-10.2374	-7.85134	-11.0922	-9.35323	-7.42698	-10.0556	-7.8896	-11.5775	-10.6506	-15.2211	-12.1595	-10.7614	-6.98274	-8.65324	-7.96012
346.5	757.5	11.1404	4.55647	-7.16757	-14.895	-15.7278	-11.5623	-10.8021	-13.4247	-10.3771	-12.672	-14.18	-10.5218	-10.4024	-13.4739	-9.6822	-8.94721	-10.6092	-8.65276	-8.57305	-10.3039	-8.47422	-10.8882	-10.7644	-8.68727	-9.23885	-14.681	-11.2809	-8.62511	-12.5122	-14.0524	-11.3561	-10.2871	-14.4739	-9.0282	-9.21554	-11.7133	-12.9665	-7.58149	-11.593	-8.15785	-11.6687	-10.7625	-15.0203	-12.2546	-12.1317	-7.76954	-9.71441	-9.82056
347.5	757.5	11.1405	4.55647	-6.2916	-16.138	-13.1503	-12.7403	-10.6438	-15.4549	-8.74875	-12.7348	-11.3249	-10.7697	-8.58712	-15.289	-10.6849	-9.18287	-11.472	-12.1869	-8.36732	-9.44036	-8.73911	-12.1497	-11.5663	-10.5334	-10.6411	-14.2839	-10.062	-12.9018	-11.4531	-15.0016	-12.4859	-7.62029	-12.5917	-8.85601	-14.5353	-12.0896	-13.0295	-8.62919	-10.7589	-10.7994	-12.3004	-12.1699	-14.534	-13.4751	-15.5727	-9.35717	-9.64738	-11.6784
348.5	757.5	11.1406	4.55647	-6.4294	-14.9892	-11.8439	-15.9745	-10.5004	-13.9025	-9.03137	-13.8247	-10.4618	-11.2796	-7.58463	-12.3376	-10.182	-10.023	-14.0509	-14.0511	-9.94427	-11.1635	-10.0144	-11.012	-12.4501	-11.4931	-9.29724	-10.5137	-9.26363	-12.295	-10.5558	-14.3427	-10.4099	-7.48825	-12.0686	-10.1649	-12.0986	-10.7538	-10.4402	-9.04453	-10.5125	-11.8464	-12.9035	-13.1021	-14.7636	-13.1827	-13.2297	-12.8221	-10.308	-12.2752
349.5	757.5	11.1406	4.55647	-6.90478	-13.9237	-12.2814	-15.6544	-11.8161	-13.4868	-10.9308	-13.7363	-11.1262	-12.6038	-8.35126	-11.205	-9.30632	-10.646	-13.7773	-10.2442	-10.253	-13.8062	-10.2749	-10.9325	-12.3753	-10.6117	-6.45742	-11.0658	-10.8428	-10.8928	-12.5695	-13.6795	-10.9173	-8.12299	-9.80793	-8.97173	-10.0356	-9.77464	-11.6516	-8.30708	-9.93149	-10.5127	-14.3629	-14.4704	-13.2368	-10.5794	-9.98889	-13.3937	-11.589	-13.1086
345.5	758.5	11.1403	4.55638	-8.07185	-13.3512	-15.9041	-12.0148	-8.37982	-11.3075	-11.5816	-13.4919	-16.5466	-11.457	-12.0899	-9.74075	-7.32824	-7.61627	-9.737	-9.57525	-9.25244	-12.1362	-9.86084	-10.5189	-9.93484	-8.84027	-9.05828	-12.3877	-12.4186	-7.48918	-8.62345	-14.5146	-10.3772	-9.16311	-10.9292	-8.82309	-7.39379	-12.8815	-10.4799	-9.52049	-12.0936	-8.03125	-10.7447	-11.2913	-11.6585	-10.8449	-10.453	-8.95602	-7.3723	-7.13552
346.5	758.5	11.1404	4.55638	-6.35548	-16.7729	-17.2474	-12.0503	-8.3978	-14.251	-10.2169	-13.0739	-14.5733	-12.8394	-12.4348	-12.442	-8.35814	-8.94231	-11.2093	-9.26654	-8.07707	-10.1243	-9.05037	-10.7053	-10.9435	-8.28892	-9.78062	-14.8235	-10.6124	-9.05936	-10.5564	-14.4865	-11.2467	-10.4563	-13.6818	-8.63117	-8.71454	-11.6708	-13.5231	-9.08217	-12.8629	-9.87608	-11.9552	-12.3565	-12.4496	-11.4309	-12.3288	-8.93891	-8.86361	-9.31443
347.5	758.5	11.1405	4.55638	-6.76219	-16.9085	-14.1739	-13.5404	-9.2338	-16.9104	-10.3195	-12.8269	-12.9002	-13.352	-9.35285	-13.8858	-10.4391	-9.98098	-12.2863	-11.472	-7.67101	-9.23829	-9.09034	-11.2736	-11.2868	-9.33971	-8.73665	-14.4246	-10.1789	-12.2654	-9.55565	-14.0479	-11.3048	-9.10295	-12.585	-8.78565	-13.1747	-11.046	-13.4956	-9.44637	-10.5912	-11.5585	-11.0202	-13.0403	-12.448	-11.118	-15.9644	-9.12926	-10.544	-12.4406
348.5	758.5	11.1406	4.55638	-8.51104	-14.5648	-12.0837	-15.5852	-10.6617	-18.3625	-11.2978	-12.6633	-11.0497	-13.2201	-7.3597	-13.7435	-10.767	-11.2513	-13.4536	-13.0511	-9.73756	-10.5011	-9.19052	-11.9357	-10.6004	-10.6115	-7.95938	-10.9941	-10.3189	-11.5307	-9.57686	-12.2349	-9.94179	-8.58241	-11.3373	-8.29833	-11.521	-9.77869	-12.4392	-10.6318	-9.81215	-9.94958	-11.1214	-12.7994	-12.2517	-10.8322	-15.5687	-11.9529	-13.066	-12.774
349.5	758.5	11.1406	4.55638	-9.61709	-12.8081	-12.0747	-14.0792	-12.2144	-17.6178	-13.389	-12.9102	-10.0128	-13.0726	-6.85464	-12.2346	-8.64781	-11.6702	-12.1383	-10.8681	-10.3859	-11.9354	-10.188	-11.0492	-10.1049	-10.2297	-6.45265	-11.8484	-11.2659	-10.5429	-11.9396	-11.4707	-10.5548	-8.40558	-9.15248	-7.88454	-8.7537	-10.3204	-13.3933	-9.90341	-9.9919	-8.63654	-13.436	-13.9127	-11.0077	-9.2557	-11.5009	-14.0386	-11.4124	-13.2525
349.5	759.5	11.1406	4.55629	-11.6952	-12.1126	-13.4476	-13.9445	-9.71475	-15.6154	-11.2135	-15.7892	-9.40613	-10.6601	-8.0795	-12.9502	-10.8516	-15.0755	-9.93421	-10.377	-10.5118	-10.6667	-10.6617	-10.7327	-8.79882	-10.8152	-7.50404	-11.0824	-11.1307	-11.8876	-8.80608	-12.3949	-12.6084	-10.9148	-11.3345	-8.28674	-8.88541	-9.55875	-11.8533	-11.6551	-10.5808	-7.32862	-11.5967	-11.8565	-11.3717	-11.0987	-13.9779	-15.1057	-9.62182	-11.833
628.5	801.5	11.1655	4.55224	-6.64705	-13.0508	-14.1187	-9.8716	-7.40415	-8.04681	-9.20813	-12.3867	-9.39278	-9.97983	-8.86466	-10.1496	-8.56127	-9.57126	-6.63138	-8.25065	-12.3575	-9.18222	-10.9666	-11.4109	-8.85994	-8.48196	-7.87335	-9.59486	-10.1138	-13.5794	-7.62129	-9.19254	-8.22428	-5.40903	-9.31901	-9.10688	-10.9561	-6.01878	-6.99986	-8.84824	-8.72172	-14.8016	-10.7234	-9.13125	-9.25171	-12.5749	-10.4059	-9.00137	-7.00695	-13.6976
629.5	801.5	11.1656	4.55224	-6.46042	-10.7942	-11.1728	-8.62259	-7.09253	-10.2828	-10.2768	-13.5377	-9.64859	-8.96897	-11.5049	-10.666	-8.83075	-9.75458	-5.51451	-8.8932	-9.52457	-8.77029	-12.0358	-11.7029	-9.72026	-8.09041	-8.86643	-10.7147	-10.8537	-11.7631	-7.8149	-10.2367	-8.6856	-4.65863	-7.42009	-8.27435	-7.55445	-8.53776	-7.97996	-9.05445	-9.77649	-12.3938	-11.9431	-6.99573	-7.94488	-12.4568	-11.6401	-9.30409	-7.37567	-11.8684
627.5	802.5	11.1654	4.55216	-7.662	-11.5118	-12.4082	-11.3447	-5.43777	-6.67669	-8.26299	-12.8433	-10.0644	-10.2892	-6.07934	-6.41049	-8.3016	-7.75012	-9.85578	-8.94338	-13.5387	-13.8011	-10.6409	-10.5243	-8.00976	-9.49243	-6.83701	-8.21823	-11.6438	-13.1105	-8.34641	-9.34007	-10.2516	-8.97117	-12.1205	-8.44507	-11.0003	-4.86392	-8.70353	-11.8365	-7.85364	-13.6514	-8.03988	-12.1921	-11.5154	-14.7669	-11.1761	-9.80204	-11.9073	-16.1828
628.5	802.5	11.1655	4.55215	-6.06628	-13.714	-11.7706	-9.9504	-7.43469	-8.49681	-10.6799	-12.4321	-10.7622	-13.5053	-7.90251	-6.59258	-8.32033	-9.77084	-7.33039	-9.20348	-13.0637	-11.1316	-9.80088	-9.51407	-8.63659	-8.53819	-8.26895	-10.911	-10.0543	-11.1507	-8.1525	-8.76389	-9.85363	-7.99553	-10.7264	-9.64201	-10.6176	-6.31322	-7.86005	-11.3846	-8.78821	-15.1363	-9.44988	-10.0019	-11.5298	-13.649	-11.3655	-10.5267	-8.71649	-16.337
629.5	802.5	11.1656	4.55215	-4.14701	-13.0225	-11.0534	-9.05861	-10.5798	-11.0878	-12.4099	-11.9456	-11.194	-13.0654	-10.8965	-8.19483	-9.48875	-10.301	-5.94859	-9.28705	-11.5731	-9.92817	-12.0132	-9.85388	-11.1303	-7.91535	-9.62003	-11.4526	-8.62002	-9.11115	-9.47856	-9.87741	-9.24404	-7.44488	-8.68291	-9.26107	-8.54231	-10.6572	-8.35912	-10.1922	-9.02233	-13.2165	-12.2901	-8.65527	-10.9291	-12.4237	-12.653	-10.8254	-8.16013	-13.2688
630.5	802.5	11.1657	4.55215	-4.62221	-13.6821	-10.51	-8.83314	-8.7553	-13.1828	-10.7282	-12.6762	-9.18657	-9.71113	-11.8915	-10.117	-8.77924	-10.8326	-6.81152	-10.2008	-13.2678	-9.6093	-14.0007	-10.692	-10.1056	-7.18766	-7.85027	-9.00671	-7.55094	-7.66595	-10.6346	-10.6254	-7.47149	-6.1314	-5.58403	-6.75423	-7.40909	-14.0782	-8.61113	-9.45824	-8.50961	-11.742	-12.5877	-8.10941	-8.80732	-13.1817	-13.5239	-11.6825	-9.41218	-11.6013
631.5	802.5	11.1658	4.55215	-7.35459	-15.6774	-10.2627	-9.5703	-6.31138	-12.014	-11.2024	-13.5476	-8.83051	-8.13554	-10.5216	-8.61561	-9.48335	-13.4929	-8.68833	-11.9888	-15.0054	-10.0477	-11.2522	-9.63751	-8.01741	-9.70451	-7.01394	-12.1814	-8.3297	-6.59689	-10.1648	-10.9569	-7.08357	-5.92492	-3.98742	-6.09203	-8.09566	-13.2111	-7.29444	-9.10202	-8.31054	-12.2471	-11.4488	-7.39121	-6.82886	-13.5657	-12.1801	-11.4145	-11.3017	-11.3615
632.5	802.5	11.1659	4.55215	-10.4465	-16.4417	-9.64333	-9.11645	-6.13703	-10.2433	-12.5889	-12.3753	-10.2295	-9.30405	-9.0409	-8.59394	-10.4091	-13.229	-11.4937	-13.5344	-12.2781	-10.9876	-8.81954	-9.74016	-8.73089	-13.0559	-9.41071	-14.7249	-9.50494	-6.8916	-10.1642	-12.6079	-7.6916	-6.96931	-5.69876	-9.00918	-6.59767	-13.1061	-9.10397	-9.60794	-8.425	-12.3525	-12.7491	-6.64643	-6.54142	-13.0701	-10.2015	-9.79902	-13.0356	-11.6108
633.5	802.5	11.1659	4.55215	-7.94629	-14.6367	-8.78115	-8.23205	-6.94614	-8.17968	-12.3752	-9.89726	-9.92596	-11.1742	-7.81383	-8.79594	-10.3454	-11.9428	-13.2873	-13.5733	-10.6803	-11.5776	-8.52911	-10.666	-9.20779	-14.3767	-9.32093	-11.794	-9.10829	-7.88382	-10.3369	-15.0362	-10.0994	-9.00008	-7.79202	-11.1382	-7.03391	-13.5308	-11.464	-11.5437	-9.68509	-11.2693	-11.9183	-6.58065	-7.51535	-13.5229	-9.23878	-9.67305	-16.0711	-12.0829
627.5	803.5	11.1654	4.55207	-9.66424	-11.0558	-12.2067	-12.5249	-3.91646	-8.04256	-8.86344	-12.1559	-8.80002	-10.226	-7.28442	-4.06466	-8.52027	-8.25869	-9.81987	-8.8885	-10.1827	-14.6659	-9.51468	-10.612	-8.09684	-9.99202	-7.63887	-8.47711	-14.1351	-12.0123	-5.66585	-9.20128	-11.4925	-10.6558	-12.9035	-7.81499	-10.6034	-6.83889	-9.48246	-11.204	-8.71052	-10.2784	-8.31372	-11.535	-11.7687	-13.3371	-11.4792	-8.60752	-13.0549	-15.2088
628.5	803.5	11.1655	4.55207	-5.60017	-12.6053	-11.135	-10.5214	-6.34158	-11.0786	-12.9853	-12.4538	-12.3388	-12.8517	-8.75998	-4.05289	-8.79899	-10.0859	-7.84963	-8.82768	-11.0865	-14.7691	-10.1213	-10.6898	-8.76516	-8.67756	-8.95322	-10.4312	-10.608	-9.47761	-6.13894	-8.8728	-11.1046	-10.6728	-11.1736	-9.52309	-12.8569	-11.0059	-10.3556	-12.3022	-9.63839	-9.17005	-10.2071	-10.9094	-12.4155	-10.6627	-11.2195	-9.15917	-10.9809	-14.2225
629.5	803.5	11.1656	4.55206	-3.42203	-13.4917	-11.4676	-9.31238	-10.047	-12.9765	-15.015	-11.2983	-12.6077	-11.5525	-10.1554	-6.01781	-10.9073	-9.94136	-6.86515	-8.55997	-11.3142	-12.9037	-12.3139	-11.4386	-10.358	-7.80285	-9.54848	-11.3221	-7.54025	-8.17422	-8.70388	-9.77087	-9.0929	-10.0789	-10.089	-10.8148	-10.7249	-16.015	-9.86206	-11.8598	-10.266	-10.0747	-13.1192	-11.0511	-10.5853	-9.90204	-14.4826	-9.49573	-10.3131	-12.8047
630.5	803.5	11.1657	4.55206	-4.552	-14.7675	-12.645	-9.26137	-8.50706	-12.6032	-12.764	-11.1837	-10.1229	-9.51025	-9.55178	-8.37938	-11.4667	-10.448	-7.78753	-9.43275	-11.4194	-11.3354	-13.8592	-11.9223	-7.92067	-7.12236	-8.50339	-10.1566	-6.49371	-7.87965	-11.3938	-9.6294	-6.58964	-9.57021	-6.75187	-8.22433	-8.38016	-13.456	-6.25657	-10.6373	-9.34853	-10.8414	-11.3272	-9.59189	-8.05689	-10.1995	-16.815	-11.0944	-12.484	-11.9826
631.5	803.5	11.1658	4.55206	-7.56659	-15.7322	-12.0634	-10.3054	-6.27947	-11.8508	-13.5214	-11.3109	-9.14479	-9.24361	-9.46668	-9.96047	-10.7052	-13.0195	-10.2456	-11.0035	-11.6633	-12.2523	-10.61	-10.5226	-7.2393	-8.41134	-7.68174	-11.5823	-8.15067	-7.74514	-11.6315	-8.75655	-7.13075	-9.09029	-5.40375	-7.76654	-7.53205	-13.315	-5.89083	-9.57135	-8.73768	-11.792	-9.73487	-7.53891	-6.6648	-9.60971	-13.7113	-11.8049	-14.6941	-13.0646
632.5	803.5	11.1659	4.55206	-8.74438	-16.1871	-10.6431	-11.2145	-6.19495	-11.133	-15.2385	-10.7051	-9.50266	-10.5158	-11.2238	-10.6673	-11.64	-14.796	-13.0923	-12.4883	-10.2968	-14.1801	-8.2132	-10.0736	-7.77176	-11.682	-9.75663	-12.9525	-8.35399	-7.41699	-10.8612	-9.29615	-9.00583	-8.18144	-6.00238	-9.20134	-6.24824	-15.1251	-8.69893	-8.58306	-9.77295	-12.8096	-10.0569	-7.50582	-7.14332	-8.54759	-10.9137	-11.29	-15.1162	-12.1606
633.5	803.5	11.1659	4.55206	-6.04118	-17.4648	-9.56761	-10.8823	-7.07598	-10.1867	-13.494	-9.40011	-9.677	-11.063	-8.93378	-10.0016	-11.8936	-14.6997	-13.1432	-12.0971	-8.2304	-14.1188	-8.18266	-11.2677	-8.1467	-15.5319	-10.6189	-12.4173	-7.6783	-7.40528	-10.0374	-10.9457	-11.7818	-8.51196	-7.29095	-10.2946	-6.38828	-12.9481	-12.6103	-7.71951	-11.2653	-12.3031	-10.4891	-8.49598	-8.38889	-8.68999	-10.0997	-11.4574	-13.0404	-11.8612
634.5	803.5	11.166	4.55206	-4.50904	-15.1218	-9.285	-9.76699	-7.34229	-8.7258	-11.713	-8.64147	-7.87432	-9.80097	-8.10936	-8.93706	-10.9133	-13.2356	-10.3701	-10.724	-7.88666	-12.8478	-9.85885	-12.3498	-9.20674	-17.4922	-8.69148	-12.0238	-8.25274	-9.42306	-10.4844	-11.5381	-12.5312	-11.0439	-9.03388	-10.8951	-8.07549	-11.1117	-12.5629	-7.51643	-10.2077	-11.3719	-10.2737	-9.67863	-9.11333	-11.1499	-11.5625	-12.7849	-10.9516	-12.2492
635.5	803.5	11.1661	4.55206	-4.61391	-12.9343	-9.80378	-9.11503	-6.43211	-8.41395	-10.9297	-10.7517	-8.11832	-9.45547	-7.83713	-7.20774	-9.67269	-10.7011	-8.29979	-9.90589	-10.2899	-12.2362	-12.6756	-12.4804	-9.79034	-14.837	-7.79811	-11.7877	-10.168	-12.2559	-9.2604	-10.6094	-10.618	-12.3475	-10.4498	-10.9686	-10.3604	-10.6368	-11.2852	-8.48697	-7.2289	-11.1672	-11.1202	-10.1492	-10.0709	-12.3906	-12.9768	-14.0176	-10.887	-11.278
636.5	803.5	11.1662	4.55206	-5.63922	-11.7131	-11.0787	-8.70027	-5.02793	-9.94893	-10.5396	-12.24	-9.73239	-10.3585	-7.71046	-6.96565	-8.00741	-8.65609	-8.44474	-10.3819	-12.2631	-13.1997	-14.1034	-11.6697	-9.26718	-11.4324	-6.57267	-11.9809	-11.0314	-11.9846	-7.45985	-12.1738	-9.70097	-11.9235	-10.2671	-11.2809	-11.9595	-8.96992	-10.4074	-9.91283	-7.08619	-10.4069	-14.3939	-9.94382	-10.7512	-10.6747	-11.7773	-13.8732	-12.2111	-13.1551
627.5	804.5	11.1654	4.55198	-11.0388	-10.2785	-11.4552	-11.154	-5.03183	-9.63987	-8.6479	-11.3356	-8.79828	-9.23657	-9.42141	-4.64963	-9.5145	-8.94956	-11.8453	-8.54274	-8.00448	-12.9877	-10.3326	-11.0441	-9.1604	-10.3675	-8.18065	-9.40959	-16.2529	-14.9027	-5.17537	-10.8336	-9.86385	-7.42893	-11.5958	-8.54804	-9.08712	-7.98283	-12.1385	-12.1247	-8.69162	-7.01568	-9.19595	-11.268	-12.0694	-11.1188	-10.4134	-8.50165	-11.9172	-14.7557
628.5	804.5	11.1655	4.55198	-8.27614	-10.4643	-12.8006	-10.0325	-5.92262	-12.5168	-11.457	-12.8396	-11.5355	-10.0887	-9.03567	-4.89066	-9.3443	-9.86186	-10.1903	-7.39057	-9.2315	-14.4346	-12.3424	-12.8567	-9.5813	-9.05716	-10.3662	-9.44342	-13.1014	-12.5036	-5.43456	-9.49523	-10.6513	-8.16247	-10.2132	-9.39575	-11.6242	-11.2876	-13.8389	-12.5693	-9.38172	-5.88176	-11.5077	-9.79202	-11.4727	-9.77024	-10.8541	-8.62869	-11.1178	-14.2949
629.5	804.5	11.1656	4.55197	-6.80861	-11.3668	-14.2822	-9.16472	-6.69239	-14.1803	-13.492	-12.7794	-12.5329	-10.6214	-8.51113	-6.82529	-10.2189	-9.7457	-8.7194	-6.92658	-10.0382	-14.8312	-14.7042	-12.9005	-8.89702	-8.29359	-9.70309	-10.9518	-9.2386	-10.5734	-8.6618	-9.56596	-7.89041	-8.45698	-9.28522	-10.826	-9.22536	-13.2424	-9.9812	-11.2167	-10.179	-7.21907	-12.7816	-11.2276	-9.46116	-9.42205	-13.8481	-9.17358	-10.6342	-12.7269
630.5	804.5	11.1657	4.55197	-7.11036	-13.1126	-13.1018	-8.91369	-6.71294	-12.8074	-12.8029	-11.8896	-11.1327	-10.5291	-7.87537	-9.04561	-9.19327	-8.6507	-8.70882	-8.33289	-10.3284	-12.3156	-14.5393	-11.6886	-6.88596	-8.14828	-9.29194	-10.8656	-8.15977	-10.3484	-10.5134	-9.20427	-6.64701	-8.22437	-8.56414	-10.1807	-6.57579	-12.1182	-6.78048	-9.02759	-9.50057	-9.57255	-10.1421	-10.4053	-7.93769	-9.72038	-14.6175	-10.4898	-11.3231	-11.8454
631.5	804.5	11.1658	4.55197	-8.363	-13.9197	-11.4922	-9.50934	-6.54608	-12.2616	-12.8473	-11.1854	-10.4444	-10.1718	-9.06371	-10.3513	-8.09846	-9.13833	-10.723	-10.4342	-10.345	-12.3624	-10.5787	-10.4932	-7.36945	-9.29173	-9.17039	-10.1565	-9.48836	-10.5575	-10.6964	-8.67928	-7.67258	-7.87885	-8.64349	-9.59078	-6.093	-12.3863	-7.03227	-7.92068	-9.4711	-10.4333	-7.63109	-8.57285	-7.40061	-9.40209	-11.682	-11.2167	-12.4514	-13.1404
632.5	804.5	11.1658	4.55197	-7.98772	-13.416	-11.0276	-10.9665	-6.81712	-11.8196	-14.6331	-10.7985	-10.879	-10.0628	-11.2828	-11.4961	-10.5873	-11.6494	-12.3519	-12.4136	-9.63799	-13.9516	-8.53395	-10.9064	-8.33698	-11.885	-9.50097	-10.331	-9.90735	-9.85176	-11.8817	-8.43922	-9.86421	-6.4399	-7.88025	-9.77908	-6.6442	-13.9692	-10.5126	-7.6367	-9.30366	-10.8633	-7.13605	-8.64421	-8.18855	-8.36566	-10.1681	-11.4057	-11.8528	-13.8095
633.5	804.5	11.1659	4.55197	-5.8108	-12.292	-10.3315	-12.131	-7.09481	-10.4163	-15.125	-10.7654	-10.7942	-10.9386	-10.3754	-10.9464	-10.673	-14.6159	-11.6708	-12.6314	-7.65096	-14.2297	-9.47846	-12.7995	-9.38007	-14.9627	-9.48346	-10.8314	-8.51716	-9.29586	-10.8626	-8.48128	-11.1362	-5.84765	-7.28919	-9.90733	-7.31572	-12.5438	-13.1801	-6.60173	-9.02406	-12.1562	-9.03322	-9.734	-9.98655	-8.038	-10.522	-12.4241	-10.6918	-12.6637
634.5	804.5	11.166	4.55197	-4.23346	-11.2373	-9.76352	-11.1903	-6.88093	-9.00572	-12.9957	-10.622	-8.38964	-11.4801	-8.295	-9.97975	-10.4187	-15.6302	-10.4569	-10.7399	-7.15302	-11.7141	-11.1829	-13.3384	-10.6102	-15.9342	-8.16728	-12.3527	-8.2418	-11.1713	-11.4725	-9.20867	-11.6072	-6.86319	-8.90686	-10.6602	-9.05666	-11.4973	-12.1873	-6.56791	-10.032	-12.0188	-10.7293	-10.5659	-10.7764	-9.75265	-12.68	-14.1103	-10.3086	-11.9102
635.5	804.5	11.1661	4.55197	-3.9958	-10.795	-10.1502	-10.2256	-6.35492	-9.60316	-11.7086	-10.9949	-8.3052	-11.5428	-7.62841	-8.97385	-10.6062	-12.7794	-9.56073	-10.1001	-9.34362	-8.72214	-13.6647	-15.2037	-9.49859	-13.8142	-7.88347	-14.1966	-8.49728	-13.1004	-8.5188	-10.0739	-10.5859	-7.65025	-13.2653	-12.7351	-10.293	-10.6337	-11.1757	-8.38834	-10.5671	-10.0446	-11.0037	-10.494	-11.4605	-11.0469	-14.5117	-14.6221	-11.3239	-12.4377
636.5	804.5	11.1662	4.55197	-4.12663	-11.5004	-11.3936	-10.1008	-4.87639	-10.0527	-11.5333	-11.3896	-9.21985	-10.7994	-7.50378	-7.84098	-10.3196	-9.09823	-9.25355	-10.567	-11.0921	-8.8042	-14.3534	-11.8542	-7.63916	-11.3028	-7.52453	-15.5559	-9.37813	-11.7747	-6.95649	-11.4578	-9.66147	-8.07549	-14.3006	-12.6216	-11.836	-8.39324	-11.189	-10.2539	-9.14727	-8.83948	-11.3905	-9.79771	-12.4221	-10.4566	-13.8286	-14.1107	-13.1832	-12.8646
626.5	805.5	11.1653	4.55189	-9.71343	-10.3177	-10.5912	-10.2397	-8.1475	-9.03773	-8.03436	-8.66014	-9.32571	-9.56275	-13.187	-7.41295	-11.8338	-9.37814	-11.7342	-7.70107	-6.79086	-13.7514	-11.1702	-10.1773	-12.2541	-10.9454	-6.80661	-10.3321	-12.3164	-12.4714	-11.1527	-13.2472	-9.37276	-7.13009	-10.7712	-10.7899	-8.81301	-7.57596	-12.5908	-12.6177	-10.4659	-9.32431	-9.08018	-12.8746	-10.4225	-11.5047	-11.407	-10.7598	-10.4584	-17.9336
627.5	805.5	11.1654	4.55189	-9.93415	-9.19956	-10.8329	-10.661	-6.93689	-10.0296	-8.26435	-10.5377	-10.631	-9.93677	-10.7597	-7.48333	-9.31241	-8.74941	-14.6152	-7.19068	-7.32568	-10.8153	-11.3353	-12.0718	-10.447	-11.7528	-8.79082	-8.7268	-14.1226	-13.9067	-8.74485	-12.2306	-9.29902	-5.67627	-10.7409	-10.4694	-9.39038	-8.9422	-14.1356	-11.0688	-8.02478	-6.47673	-8.83137	-8.94032	-11.3921	-10.3803	-10.2385	-11.0792	-10.6228	-15.9459
628.5	805.5	11.1655	4.55189	-9.34847	-7.71243	-12.6273	-10.6673	-5.99127	-12.2383	-9.54008	-12.7219	-11.2871	-11.1062	-8.64405	-8.53026	-7.99334	-9.43874	-12.5971	-6.4835	-8.70741	-11.4635	-13.4286	-12.4355	-10.2013	-10.9074	-11.8637	-8.5412	-14.7491	-14.2157	-8.32507	-10.1282	-10.0667	-6.13124	-9.33956	-10.2282	-10.0541	-11.4696	-13.295	-10.8842	-8.40216	-5.35971	-9.97247	-7.50115	-10.6591	-9.66106	-9.92938	-11.3359	-10.5997	-14.7431
629.5	805.5	11.1656	4.55189	-8.93766	-8.1062	-14.3142	-10.2418	-5.2595	-13.4638	-10.6189	-14.4237	-10.7096	-12.1384	-8.35448	-10.0744	-8.38838	-9.67178	-10.5957	-6.49147	-9.85397	-13.2687	-17.007	-12.193	-9.97692	-10.0656	-10.0032	-10.1338	-11.1859	-12.7662	-10.9346	-9.46971	-10.182	-5.41997	-8.18451	-10.8367	-6.76668	-12.2697	-8.95841	-9.51467	-9.10384	-6.90366	-11.2832	-8.81479	-9.88474	-10.4635	-11.8306	-11.3412	-10.8001	-13.653
630.5	805.5	11.1657	4.55188	-7.07956	-10.0863	-12.9598	-9.42492	-5.89233	-12.1796	-10.9914	-14.7685	-10.9467	-11.541	-9.20493	-10.9678	-8.3943	-8.33052	-9.38591	-8.54182	-10.4852	-11.8474	-16.5689	-11.1664	-9.31743	-9.68207	-9.23262	-11.2631	-9.72828	-12.1055	-10.0453	-9.45682	-9.66935	-4.54735	-9.50512	-12.3376	-4.27623	-10.6637	-6.41285	-7.49814	-9.37011	-8.81005	-10.5515	-10.1723	-9.75357	-12.3662	-13.249	-10.9833	-10.7831	-12.7074
631.5	805.5	11.1658	4.55188	-7.20092	-11.2319	-11.7005	-8.95549	-7.27683	-11.4073	-11.7358	-12.8969	-11.6601	-9.9923	-10.0403	-10.7518	-7.89563	-7.80986	-11.1494	-11.2822	-11.7232	-11.8224	-11.3144	-10.494	-9.6935	-10.5063	-11.1948	-10.2428	-10.1824	-12.0351	-10.4528	-10.0059	-10.045	-4.7123	-11.4815	-12.1503	-4.18359	-10.6993	-6.75846	-6.52933	-10.2975	-8.31168	-8.1759	-10.1861	-9.3426	-12.1265	-9.46625	-9.95237	-10.7158	-12.7464
632.5	805.5	11.1658	4.55188	-7.66339	-11.155	-11.3954	-9.4045	-7.53738	-10.5037	-12.6449	-12.3151	-11.3006	-9.2909	-9.63075	-10.6972	-9.32185	-10.1232	-13.6554	-11.5452	-11.9908	-13.1372	-9.79215	-11.1896	-10.1458	-11.3002	-10.5702	-9.1884	-10.6322	-10.832	-10.6978	-9.29646	-10.3996	-4.96346	-8.77162	-10.6894	-7.0476	-12.3628	-10.8362	-6.83159	-10.2158	-8.10242	-6.7038	-10.0689	-9.42397	-10.2579	-8.97896	-9.47077	-10.6071	-12.9352
633.5	805.5	11.1659	4.55188	-6.12878	-10.3043	-11.0011	-9.77309	-6.82735	-9.44632	-12.8565	-13.4042	-9.55227	-10.1791	-8.08241	-11.5846	-9.29342	-12.8236	-11.2209	-11.2392	-9.25069	-12.8392	-11.6112	-12.0754	-10.8972	-11.0934	-8.30402	-8.96684	-10.7566	-9.63634	-10.9257	-8.31638	-10.954	-3.9023	-6.94862	-8.99443	-9.78554	-13.4493	-12.2187	-6.85206	-9.04043	-9.2075	-8.28035	-10.2101	-9.7904	-9.47693	-11.4458	-11.2381	-10.8935	-12.1053
634.5	805.5	11.166	4.55188	-4.47397	-9.8811	-10.6775	-9.44992	-6.30868	-9.23291	-12.5143	-13.9096	-8.55018	-11.9661	-6.57782	-11.7071	-8.68763	-14.3635	-10.6897	-10.9052	-8.8716	-10.9988	-12.3317	-11.2574	-12.5203	-10.8671	-7.88861	-10.9444	-8.87807	-10.9174	-10.5641	-9.32003	-10.7938	-3.69753	-8.4435	-8.90386	-9.91066	-12.1639	-11.6038	-7.53625	-9.79129	-10.7014	-10.6713	-10.7533	-8.45713	-9.86456	-12.7328	-14.1265	-12.3312	-12.427
635.5	805.5	11.1661	4.55188	-3.91956	-10.2882	-11.0172	-9.33077	-5.87356	-10.3283	-12.909	-12.3359	-8.66798	-13.9586	-6.04438	-10.9187	-7.77726	-13.7725	-10.6886	-11.3803	-10.0053	-7.64789	-14.6672	-11.1467	-10.9236	-12.0605	-8.70919	-13.6528	-8.06941	-11.2214	-7.94554	-11.5189	-10.6811	-4.60468	-11.8909	-9.99405	-9.47881	-9.66871	-10.2831	-7.45937	-10.6586	-9.2321	-10.4123	-10.6831	-10.1676	-10.5083	-11.3811	-15.0197	-14.0129	-14.3994
636.5	805.5	11.1662	4.55188	-3.93499	-10.4522	-10.8968	-9.72974	-5.3051	-10.3795	-13.372	-11.1314	-8.69502	-13.634	-6.07832	-9.12664	-6.56514	-12.2137	-10.0765	-11.9021	-11.1658	-8.4493	-14.6202	-9.4767	-7.5416	-10.8866	-11.2903	-13.0386	-10.1977	-10.1441	-7.00075	-12.9303	-9.35124	-5.19175	-10.9436	-9.38208	-11.2047	-7.77565	-10.9211	-8.19224	-10.7856	-7.62006	-8.30389	-10.2037	-12.5529	-11.3799	-10.9089	-14.8091	-13.6544	-12.8331
626.5	806.5	11.1653	4.5518	-8.01506	-10.4356	-11.7812	-10.32	-10.5162	-9.74658	-7.93709	-8.14806	-12.5824	-9.75715	-11.4808	-7.1981	-8.93275	-10.6216	-9.56324	-8.08362	-8.58949	-13.2567	-12.5149	-12.7074	-10.9301	-10.8133	-9.15264	-10.4276	-11.048	-12.1445	-12.0206	-14.3489	-9.742	-7.15925	-9.82985	-12.6813	-9.22465	-9.16184	-11.6041	-8.97299	-9.85749	-10.8528	-8.20716	-10.5575	-10.2556	-13.4482	-12.0067	-14.9638	-10.6981	-16.7562
627.5	806.5	11.1654	4.5518	-6.96726	-8.40643	-10.6409	-11.7681	-8.33582	-10.0272	-9.35621	-9.83789	-13.4922	-10.7904	-11.0607	-8.2886	-6.98618	-9.28533	-8.83597	-6.94036	-8.65823	-9.0299	-11.387	-12.4928	-10.0495	-10.7358	-10.8549	-9.39007	-11.372	-11.771	-11.4825	-14.5434	-8.98776	-5.97804	-11.4501	-12.383	-9.80924	-10.0239	-13.4625	-6.6679	-8.64635	-7.98473	-7.73989	-7.39544	-11.1956	-11.9196	-9.89335	-12.6957	-11.0948	-15.8542
628.5	806.5	11.1655	4.5518	-6.25015	-6.4245	-9.70361	-13.1728	-7.22324	-11.1088	-10.0361	-12.15	-11.6912	-11.2465	-8.4164	-10.2703	-6.435	-9.45908	-8.83999	-7.13686	-9.1479	-8.54792	-11.1722	-11.1526	-10.0122	-12.7317	-14.0192	-9.00804	-11.3836	-9.34378	-9.87409	-11.1003	-9.23564	-6.68827	-10.1019	-10.2383	-9.85656	-11.6717	-10.7881	-7.17134	-8.88341	-6.83868	-9.23086	-6.67695	-10.8139	-11.1238	-8.38631	-11.3466	-10.5248	-13.8599
629.5	806.5	11.1656	4.5518	-5.22054	-6.07637	-9.71589	-12.0104	-6.75779	-10.6581	-9.64702	-12.6845	-10.292	-11.2169	-8.44616	-11.3877	-7.61302	-10.0896	-9.71552	-7.41487	-9.84012	-11.0938	-14.4891	-11.42	-10.8172	-12.8075	-10.7341	-9.52712	-9.27882	-8.72068	-9.93007	-9.91469	-10.8148	-4.58135	-7.00674	-10.0468	-7.52141	-10.2982	-7.63181	-10.0885	-9.80064	-9.03708	-10.1525	-8.6331	-10.0345	-11.9719	-9.60605	-9.80676	-11.418	-13.779
630.5	806.5	11.1657	4.55179	-4.55089	-7.18054	-10.7273	-10.0976	-7.2789	-9.77143	-10.1113	-14.4734	-11.0563	-10.2025	-9.80435	-12.0061	-8.816	-9.19394	-9.08284	-9.15992	-9.58651	-10.4357	-16.9616	-13.682	-12.6131	-10.6333	-7.69218	-11.2421	-9.22893	-10.2391	-9.77069	-10.496	-12.2285	-3.29997	-7.995	-12.0456	-4.53962	-8.14451	-6.12662	-9.79485	-9.55954	-8.30004	-10.7562	-11.2834	-9.79899	-14.2233	-13.9408	-9.63852	-13.1138	-14.3775
631.5	806.5	11.1658	4.55179	-6.45308	-8.53514	-11.5254	-9.09911	-8.36704	-10.0029	-11.8766	-14.4237	-12.8361	-9.52093	-9.17966	-11.2241	-9.85132	-9.18455	-10.7719	-10.5781	-10.7287	-10.1113	-12.3088	-12.7709	-12.7068	-11.4983	-9.06736	-12.9275	-9.98211	-11.724	-12.2735	-11.812	-9.59428	-4.08377	-12.2582	-14.3549	-3.70892	-7.93787	-5.9447	-7.58589	-9.5898	-7.87223	-7.93114	-11.6092	-9.70551	-13.1921	-9.09721	-9.21902	-12.0774	-12.497
632.5	806.5	11.1658	4.55179	-7.5076	-9.94689	-11.7214	-8.77934	-8.16391	-9.90814	-13.081	-14.3739	-11.135	-10.8572	-7.8665	-12.0739	-9.58268	-11.9104	-12.5796	-9.87919	-12.3425	-11.4543	-10.4962	-11.3062	-10.5149	-12.0254	-10.9358	-12.3312	-10.7069	-10.4313	-11.1704	-10.2713	-8.67974	-5.80797	-9.82987	-12.1182	-6.23907	-9.25062	-9.3571	-7.14162	-9.99705	-8.93561	-5.89413	-11.7802	-11.1156	-12.0775	-9.12253	-9.06498	-12.3885	-10.5507
633.5	806.5	11.1659	4.55179	-6.40603	-11.0345	-11.4476	-7.92001	-7.82323	-10.6197	-12.5052	-14.8687	-9.4186	-12.2515	-6.64558	-12.4834	-9.02582	-11.1572	-11.1247	-9.37437	-12.0832	-11.2682	-10.3014	-11.0992	-9.88136	-8.6941	-8.92136	-10.3942	-12.5273	-9.23893	-10.3739	-8.93098	-9.4754	-4.17848	-6.9133	-8.09207	-10.5861	-10.7143	-10.7413	-7.38282	-9.03242	-9.74596	-7.02125	-12.7073	-13.3876	-11.3986	-13.1912	-10.9202	-13.2234	-9.90089
634.5	806.5	11.166	4.55179	-5.50101	-11.4984	-10.9671	-7.52348	-7.36257	-11.0422	-12.2654	-14.3389	-8.46026	-12.9608	-5.43424	-11.9909	-7.99729	-11.4616	-10.2315	-9.7982	-12.0339	-10.6222	-11.278	-11.1179	-13.1419	-8.20335	-9.66986	-11.3777	-9.71854	-9.36596	-9.75486	-9.77286	-8.23052	-3.56655	-7.36875	-7.39315	-9.03023	-9.56896	-10.8764	-7.09746	-9.49983	-10.6521	-9.46314	-12.1068	-11.4678	-9.92665	-11.8296	-12.6717	-13.9344	-11.1829
635.5	806.5	11.1661	4.55179	-5.04652	-11.1103	-10.2161	-8.16632	-6.46979	-10.6945	-13.5477	-12.6125	-9.3567	-13.6028	-4.86101	-12.2219	-5.50986	-12.3713	-10.2417	-10.8767	-13.1012	-9.43017	-13.303	-10.4038	-13.6077	-10.1476	-11.6385	-12.0925	-9.64484	-9.01954	-8.73901	-12.4563	-8.02759	-4.28477	-8.10414	-7.49353	-8.65347	-7.87705	-9.63092	-6.10442	-8.37223	-9.11483	-10.2613	-10.1449	-10.8137	-9.78072	-8.41453	-13.4217	-13.3186	-13.6592
636.5	806.5	11.1662	4.55179	-4.98582	-9.50191	-9.0504	-9.35983	-6.23779	-10.4945	-15.0781	-11.4409	-9.65049	-13.5318	-4.84635	-10.049	-4.18698	-14.5872	-9.95229	-11.8576	-14.9249	-11.2211	-13.7147	-8.9939	-9.28294	-10.6145	-14.3279	-11.3816	-11.5994	-9.77206	-8.22751	-15.1618	-8.73751	-4.67316	-7.52254	-7.30366	-10.3063	-8.16699	-8.82618	-6.5264	-8.51927	-7.49337	-7.87331	-9.68056	-11.8083	-10.5122	-7.86144	-12.7428	-12.5299	-12.7742
626.5	807.5	11.1653	4.55171	-5.48116	-8.48418	-11.0299	-9.2424	-10.2657	-10.5394	-8.24393	-7.41709	-13.1085	-9.05598	-9.64937	-7.14687	-6.48198	-11.3506	-8.7502	-10.3152	-8.4576	-14.0776	-13.1565	-12.6901	-9.78095	-11.3206	-11.2407	-13.7025	-11.3362	-12.5465	-8.36469	-15.5646	-9.13379	-8.01314	-9.59427	-10.4695	-9.38391	-9.8669	-11.0665	-7.21748	-11.8565	-11.9223	-9.46261	-10.4479	-12.0523	-15.2343	-13.2093	-14.3622	-11.4956	-13.2185
627.5	807.5	11.1654	4.55171	-4.82458	-7.49034	-9.64567	-11.1886	-8.94726	-10.3481	-11.203	-9.31363	-13.387	-10.4384	-10.1207	-7.49459	-5.58222	-10.5726	-7.1152	-10.7544	-9.33402	-10.5501	-11.0429	-12.1077	-9.03975	-10.1042	-12.6942	-12.2689	-11.1076	-11.4446	-7.49986	-15.7842	-8.10064	-8.27951	-11.5866	-11.6799	-11.0112	-10.0161	-14.0132	-5.60325	-10.0061	-9.11178	-9.08541	-7.48053	-13.1142	-12.7275	-10.6723	-10.4861	-12.8262	-13.0776
628.5	807.5	11.1655	4.55171	-4.60625	-6.93063	-8.9031	-12.1969	-8.74396	-9.64238	-12.8768	-12.7782	-10.0946	-10.1338	-8.36161	-9.46849	-6.27323	-10.5537	-7.69639	-10.8858	-10.2461	-8.64469	-10.0524	-10.5997	-9.50038	-11.1744	-12.8837	-10.4266	-9.59105	-8.38076	-7.90257	-12.5501	-8.47865	-8.80795	-11.4116	-10.4504	-9.55874	-9.2597	-10.237	-6.45765	-10.2495	-9.35699	-10.3861	-7.18258	-12.7188	-14.9257	-8.34521	-9.50507	-10.6415	-12.2434
629.5	807.5	11.1656	4.55171	-4.24484	-6.37407	-8.90647	-10.7521	-9.55129	-7.5337	-10.404	-13.904	-8.79685	-9.73948	-7.58748	-10.6011	-7.3826	-11.3133	-8.84558	-9.00151	-9.95488	-10.6034	-12.1035	-10.2967	-11.4302	-13.2842	-11.3394	-9.72063	-8.39405	-7.86296	-8.47222	-11.5333	-10.8799	-5.94654	-7.4812	-10.2907	-8.44124	-7.51524	-7.6288	-9.09014	-10.7546	-12.2553	-9.71203	-10.2207	-10.8585	-14.6573	-9.47486	-8.18448	-10.9222	-13.0662
630.5	807.5	11.1657	4.55171	-5.02638	-6.4176	-9.74709	-10.2951	-10.1586	-7.95228	-10.1012	-15.5822	-10.9397	-8.84724	-7.74594	-11.337	-7.28371	-9.70748	-9.24155	-8.74066	-9.78709	-9.29367	-14.1784	-13.6116	-14.6199	-11.014	-6.51911	-10.9637	-9.13138	-10.0598	-9.91756	-12.4788	-10.4728	-4.41984	-7.06266	-10.8707	-6.71468	-6.53064	-7.78882	-10.9782	-9.494	-10.1087	-9.38172	-11.7585	-8.24908	-11.9689	-13.1966	-7.96132	-10.3944	-15.7215
631.5	807.5	11.1658	4.5517	-7.22911	-7.62265	-11.3632	-9.87673	-9.44383	-9.78207	-11.1883	-15.4695	-13.2804	-9.82289	-7.72599	-11.6133	-8.1176	-9.96936	-10.8133	-9.44209	-10.7636	-8.72224	-13.5989	-13.8784	-14.1344	-12.5461	-7.83526	-15.0156	-9.77753	-10.9195	-13.1885	-13.1455	-7.45307	-5.57907	-9.75489	-12.685	-5.04938	-6.82507	-9.29032	-10.0293	-9.58029	-10.2402	-7.14991	-10.0952	-8.41164	-10.6671	-10.2208	-7.95057	-9.82587	-12.8647
632.5	807.5	11.1658	4.5517	-7.90304	-9.56662	-12.3264	-9.41233	-8.708	-11.0814	-11.0358	-14.3452	-12.2054	-12.6451	-7.26031	-11.5599	-8.55137	-10.5153	-12.1161	-10.0096	-12.2869	-10.4878	-11.4934	-11.9209	-10.1687	-12.3502	-10.5482	-14.5668	-11.0921	-10.0796	-13.0734	-10.8493	-7.28508	-8.4973	-11.8471	-12.1717	-5.60874	-7.83779	-10.7642	-9.52151	-6.90768	-10.4053	-5.56362	-10.0009	-11.0712	-9.75999	-10.8505	-8.93104	-12.2343	-10.4506
633.5	807.5	11.1659	4.5517	-6.81719	-11.0729	-12.4213	-8.47672	-8.92369	-13.1544	-10.6465	-13.1324	-10.751	-13.8561	-6.90532	-10.7322	-8.41143	-9.39967	-11.1356	-9.91417	-13.2998	-10.4334	-10.1489	-11.3952	-8.6228	-8.64507	-10.4631	-12.4275	-12.7114	-9.84479	-10.5188	-9.06378	-8.88455	-6.96346	-7.84909	-8.96546	-6.81732	-8.94787	-10.5581	-8.60112	-5.29923	-8.29175	-5.78311	-11.7506	-12.9503	-10.7132	-13.7793	-12.0884	-15.8413	-10.3619
634.5	807.5	11.166	4.5517	-5.90213	-11.4208	-12.082	-7.69157	-8.85902	-12.5354	-11.2133	-12.6395	-10.624	-11.7792	-5.70477	-9.64859	-7.55024	-9.58531	-9.77115	-9.72707	-15.1429	-10.8608	-10.742	-12.1992	-11.8242	-7.79953	-10.882	-11.659	-11.6	-9.10226	-9.09021	-9.1987	-7.36624	-5.6627	-6.76173	-7.68669	-6.24278	-7.66697	-9.2216	-6.24743	-5.91179	-9.23426	-8.56629	-10.9703	-12.3745	-10.1551	-11.7835	-14.3324	-13.4391	-11.8981
635.5	807.5	11.1661	4.5517	-5.76736	-10.2804	-10.7573	-8.34909	-8.41516	-10.4313	-13.0129	-12.4191	-11.0707	-10.644	-4.66379	-11.045	-4.92635	-10.6017	-9.31217	-10.4419	-18.147	-11.8763	-12.4427	-12.8843	-10.9532	-9.33321	-11.6795	-10.9645	-11.6447	-9.05136	-9.21908	-11.2492	-6.58566	-5.67515	-6.24421	-6.80716	-6.80737	-7.49899	-7.72274	-5.03491	-5.58673	-9.63135	-11.0427	-9.56137	-12.2868	-8.7881	-8.62749	-12.8398	-10.9248	-12.1592
627.5	808.5	11.1654	4.55162	-4.04029	-6.47634	-8.16949	-9.49508	-8.09444	-11.0543	-12.5112	-8.89391	-11.3229	-10.2678	-10.0802	-7.9715	-5.46268	-10.8656	-8.66382	-12.8553	-9.07844	-13.8291	-11.1701	-10.8961	-8.42851	-11.2953	-10.5724	-9.07357	-12.199	-12.7113	-7.55602	-11.7334	-9.29154	-10.789	-11.2716	-9.53292	-12.1311	-7.44693	-14.9841	-7.64472	-8.54668	-10.4157	-13.1874	-8.55926	-14.552	-11.3964	-12.3843	-10.8758	-13.684	-11.4187
628.5	808.5	11.1655	4.55162	-4.36961	-7.26219	-8.76623	-10.7457	-8.46686	-10.1666	-11.3866	-11.9457	-9.0507	-11.4991	-8.74917	-9.70453	-7.02833	-11.4941	-8.39367	-12.3917	-10.9339	-12.9582	-9.97941	-10.0638	-9.12254	-12.2512	-11.0664	-10.4202	-10.8666	-10.9311	-8.47101	-11.9285	-9.6447	-11.9833	-12.6618	-11.0024	-11.0164	-6.27865	-11.2766	-7.69058	-9.47646	-10.9479	-11.2767	-8.07235	-13.3221	-12.0447	-9.95913	-10.4595	-12.0379	-11.8259
629.5	808.5	11.1656	4.55162	-5.04148	-7.59581	-9.81804	-12.0563	-9.87345	-8.09708	-9.27492	-14.4752	-8.13886	-12.0341	-7.85013	-9.80904	-7.28796	-11.9575	-9.10174	-9.36849	-11.41	-11.821	-11.2796	-9.93353	-13.4008	-13.0986	-10.6104	-11.1129	-10.3213	-10.2542	-9.57205	-13.7736	-12.5628	-8.92703	-9.77725	-11.5396	-9.2485	-6.50627	-9.03839	-8.73824	-10.5134	-12.2741	-9.00662	-9.20224	-10.491	-10.9725	-10.8805	-9.28347	-11.6154	-12.5038
630.5	808.5	11.1657	4.55162	-6.62357	-7.57141	-10.9807	-11.7552	-9.36791	-8.89346	-9.71094	-16.2361	-9.89858	-9.56338	-7.62801	-9.42937	-5.63765	-9.81422	-10.4022	-8.39842	-11.628	-9.05937	-12.5914	-12.1123	-15.9512	-12.5305	-7.55952	-11.9537	-10.3779	-10.6664	-11.2824	-15.7066	-12.125	-7.05247	-8.10712	-10.7625	-7.93875	-6.92434	-10.1143	-9.74279	-9.39855	-10.8268	-8.6021	-9.3262	-7.94661	-10.1615	-13.6232	-7.76804	-9.22422	-14.3788
631.5	808.5	11.1658	4.55161	-8.02838	-8.03861	-11.265	-11.0365	-9.05981	-10.8846	-11.0122	-15.2264	-12.5062	-9.61164	-7.57652	-10.0886	-4.56999	-10.2977	-12.1285	-9.18663	-11.331	-8.77041	-13.595	-14.1621	-13.4258	-13.5213	-8.37766	-12.4362	-10.9958	-10.1941	-13.3469	-15.5129	-7.85607	-8.11017	-9.72569	-12.4846	-6.64079	-7.08337	-10.2165	-11.1916	-8.90181	-11.7503	-8.32084	-8.46464	-8.43848	-9.75741	-11.957	-6.76737	-8.96656	-13.3337
632.5	808.5	11.1658	4.55161	-7.98539	-9.57234	-10.9864	-10.9573	-8.48619	-11.8231	-10.0397	-12.385	-11.96	-11.0954	-7.48864	-11.1366	-4.77349	-9.90346	-12.9575	-11.1952	-10.5927	-10.5817	-14.0149	-12.8295	-10.577	-12.6205	-9.20765	-10.8299	-11.5091	-11.0333	-13.5992	-12.6093	-7.43609	-10.1264	-12.6963	-13.0966	-6.14689	-8.32505	-8.91569	-11.663	-5.25595	-9.48819	-7.70801	-8.86689	-10.7546	-8.7734	-11.5903	-7.84435	-12.3904	-12.2798
633.5	808.5	11.1659	4.55161	-6.88616	-9.61697	-10.6224	-10.4654	-8.78134	-12.3389	-9.47204	-10.5609	-10.1282	-11.4435	-6.81184	-10.4518	-6.28188	-9.37019	-11.4984	-12.6505	-10.803	-11.4549	-12.7792	-11.789	-9.51103	-10.005	-8.91611	-10.0077	-11.5785	-12.1883	-11.2866	-10.0936	-9.53291	-8.66843	-9.50122	-11.6163	-5.43938	-8.84292	-8.40372	-9.07911	-3.38493	-6.56921	-7.31488	-10.1253	-10.4543	-8.85512	-12.5226	-11.3588	-18.4827	-11.8964
634.5	808.5	11.166	4.55161	-5.85042	-8.81633	-10.5293	-9.19826	-10.5395	-11.6295	-10.9385	-10.9256	-10.9686	-9.65941	-5.73191	-9.4709	-6.55893	-9.80276	-9.48981	-11.441	-13.7028	-11.7447	-12.824	-13.2964	-11.6664	-8.76955	-8.98941	-10.1797	-11.3825	-11.1548	-8.04525	-9.37466	-9.07915	-6.84446	-7.17807	-9.75035	-4.83905	-8.22459	-7.1918	-6.2667	-3.83779	-7.16797	-9.28576	-10.36	-8.69259	-8.80315	-11.6303	-16.3858	-13.6899	-11.4962
635.5	808.5	11.1661	4.55161	-6.07616	-7.93937	-10.8446	-9.07588	-13.0829	-9.68901	-12.9989	-12.0175	-11.2157	-8.53148	-4.756	-10.4287	-5.71267	-11.0097	-8.22961	-11.4592	-16.8273	-12.9144	-13.4349	-13.9421	-12.1231	-9.49829	-9.56577	-10.8715	-11.3418	-10.5329	-7.56595	-10.4906	-7.57763	-6.67911	-5.63833	-7.57055	-5.68571	-8.254	-5.78005	-4.77743	-4.39487	-10.1748	-11.6881	-9.79336	-8.45559	-8.21032	-9.95743	-15.3702	-12.0825	-11.0933
630.5	809.5	11.1657	4.55153	-8.10758	-8.8536	-9.15192	-10.5731	-8.60952	-10.7449	-8.92625	-13.659	-10.5987	-9.55263	-6.78877	-7.59273	-5.6897	-10.1666	-11.8628	-9.10402	-13.4938	-10.0337	-11.4941	-11.64	-13.5777	-14.1363	-9.83212	-13.3103	-12.2028	-9.59758	-13.1598	-18.1834	-13.8661	-9.40817	-9.17536	-11.8661	-8.80094	-7.98944	-11.4428	-9.17086	-9.39655	-8.21358	-8.93952	-8.88124	-8.50922	-11.4816	-13.626	-9.28645	-12.3994	-13.058
631.5	809.5	11.1658	4.55153	-7.71296	-7.87573	-8.49136	-9.7739	-8.83376	-11.2759	-11.5246	-13.9258	-12.0642	-8.959	-6.1919	-7.93372	-4.06245	-11.0051	-14.2651	-9.72307	-11.3932	-10.0306	-12.7286	-14.7431	-9.99731	-15.322	-9.95392	-12.1482	-12.0088	-9.48458	-13.3878	-17.4223	-10.1764	-9.71482	-10.564	-12.1226	-8.79899	-8.02039	-9.6853	-11.1675	-7.78737	-9.73284	-11.027	-9.02289	-9.48367	-11.4879	-13.7309	-7.90276	-13.2648	-13.0806
632.5	809.5	11.1658	4.55152	-7.19789	-7.8925	-7.3601	-10.3555	-8.28618	-11.5212	-11.3069	-10.1097	-11.4134	-9.65875	-6.09055	-10.3291	-2.81905	-12.2366	-12.3554	-12.2561	-9.75088	-12.7114	-15.126	-12.1861	-9.79647	-15.1324	-9.02806	-10.1319	-11.8978	-11.2433	-12.5747	-13.7776	-9.03571	-8.99588	-13.1138	-12.6899	-7.66661	-9.71718	-7.10925	-10.6128	-5.1616	-9.53943	-11.8881	-9.73206	-11.8175	-10.2737	-12.9621	-8.63641	-16.5447	-14.4128
633.5	809.5	11.1659	4.55152	-6.67354	-7.28736	-6.69389	-11.2705	-8.21551	-11.4375	-10.4887	-8.80143	-9.73189	-9.6646	-5.9026	-10.7577	-4.28263	-10.8332	-11.1116	-14.1393	-8.97234	-15.7047	-13.1749	-10.7113	-10.6444	-12.8602	-7.80993	-9.90704	-11.2188	-13.7889	-12.9589	-10.9765	-10.6858	-6.90511	-11.5727	-13.2884	-6.21242	-9.83931	-6.21741	-8.6985	-4.01269	-7.91946	-11.4097	-10.1605	-11.0803	-9.44471	-12.4085	-12.0356	-18.245	-13.5883
634.5	809.5	11.166	4.55152	-7.13432	-6.63054	-6.48461	-10.3573	-9.39584	-9.26844	-11.0955	-9.37882	-10.1429	-8.61468	-5.89264	-10.3355	-5.65431	-10.8605	-9.67663	-13.3559	-10.635	-12.6942	-13.2673	-12.994	-12.6281	-10.9271	-7.71883	-10.5161	-10.7219	-12.5672	-8.17923	-10.8065	-10.6738	-5.71419	-8.31251	-11.868	-5.80607	-8.49387	-5.64501	-6.39639	-3.99149	-9.32359	-10.0631	-10.7948	-9.098	-8.95275	-11.5063	-15.2804	-14.5191	-11.636
634.5	810.5	11.166	4.55143	-3.57535	-4.44855	-4.46624	-8.53441	-8.74099	-6.07588	-7.39177	-6.18335	-9.48062	-8.08636	-5.64212	-8.48213	-4.92563	-9.71063	-11.966	-13.3943	-8.51971	-10.5253	-10.8229	-11.1715	-12.5395	-13.8189	-7.1093	-11.1878	-11.5613	-12.8012	-10.9548	-13.2382	-12.0796	-6.53018	-10.4793	-11.5158	-7.84894	-7.85707	-5.53774	-7.18836	-5.36259	-11.5701	-7.65057	-10.1087	-9.83499	-10.1693	-13.264	-15.9646	-14.4019	-11.5329
622.5	849.5	11.1649	4.54795	-11.1004	-9.4941	-12.8216	-6.4062	-10.1512	-9.00867	-9.97117	-11.0744	-8.70195	-6.46133	-10.8014	-8.62132	-12.3955	-10.612	-12.9086	-11.4729	-10.7062	-13.2808	-9.92521	-12.6386	-10.9733	-9.90001	-9.75411	-11.6175	-9.07458	-8.53046	-8.17715	-8.65001	-11.1494	-13.6146	-10.3466	-7.55488	-7.99983	-7.76085	-11.3755	-7.49333	-10.2909	-8.32915	-8.06437	-8.4862	-7.11006	-8.86134	-10.5414	-8.54094	-9.17368	-6.29628
623.5	849.5	11.165	4.54795	-9.0102	-8.35767	-13.7045	-7.57149	-10.2284	-9.01781	-11.6315	-13.4434	-12.1371	-10.41	-12.993	-8.82566	-10.1762	-11.9147	-13.3557	-12.8681	-10.9154	-14.4059	-12.4678	-12.1408	-9.18602	-9.29047	-5.84185	-12.1604	-10.1599	-10.5658	-9.90098	-8.41457	-10.4228	-12.2638	-11.6355	-7.78941	-8.7324	-8.32229	-9.19826	-9.3712	-9.61773	-7.75593	-9.82341	-9.17315	-9.21584	-10.1072	-12.3575	-9.66481	-8.46473	-5.329
624.5	849.5	11.1651	4.54795	-6.55425	-8.24009	-11.5515	-9.40887	-9.83525	-6.65199	-10.1842	-10.5786	-8.50497	-9.76796	-14.1301	-9.08826	-8.11948	-11.9623	-11.7731	-13.3882	-9.22077	-11.694	-11.9027	-9.77911	-9.14396	-9.62849	-4.84767	-11.8326	-9.98725	-12.0484	-10.7316	-9.04443	-10.179	-9.83952	-11.3626	-10.6412	-7.82092	-9.81995	-7.97346	-10.3563	-7.30631	-8.80378	-11.1601	-10.0914	-10.4932	-10.4723	-12.5393	-10.8006	-9.03178	-5.74271
625.5	849.5	11.1652	4.54795	-5.45822	-9.38326	-11.1871	-10.0913	-9.49704	-6.70806	-10.6825	-8.06603	-6.80569	-9.0233	-12.476	-9.16392	-10.0902	-13.2369	-10.4005	-11.7704	-9.67183	-9.85441	-9.90251	-9.99114	-9.92749	-11.184	-5.50441	-10.9349	-8.63539	-9.94069	-9.94618	-9.52958	-9.98367	-7.66961	-10.3693	-10.9094	-7.56454	-10.3166	-7.39234	-10.0359	-5.22577	-10.1562	-11.2178	-9.37586	-10.0007	-9.59336	-10.8501	-10.2321	-11.2228	-7.40193
622.5	850.5	11.1649	4.54786	-9.33155	-9.68461	-14.1591	-6.94652	-10.3559	-8.72814	-11.7918	-10.1601	-9.90892	-8.3215	-10.2823	-7.82567	-11.4727	-10.2953	-12.2582	-12.0225	-9.9393	-14.0238	-9.59718	-12.3856	-9.37771	-10.3922	-9.94871	-10.8403	-9.84402	-10.1322	-7.94799	-9.28195	-9.94567	-11.3223	-10.4204	-7.48952	-6.95906	-8.6308	-7.91179	-9.9633	-7.35417	-10.0159	-8.53951	-7.73823	-7.33786	-12.5193	-10.5732	-7.96641	-10.1498	-6.49335
623.5	850.5	11.165	4.54786	-7.01295	-7.76126	-12.8307	-8.30177	-11.0546	-8.23087	-13.2573	-12.9312	-10.8525	-10.9003	-12.2864	-9.16216	-10.3791	-10.5863	-15.3619	-13.6943	-9.66944	-14.791	-10.5074	-11.6483	-8.80124	-10.4002	-9.16903	-11.4911	-10.1399	-10.4585	-10.9587	-8.47084	-9.53977	-10.82	-12.1446	-8.2721	-6.45474	-9.6164	-8.37764	-10.9748	-7.91932	-9.2881	-9.49715	-9.20373	-10.0592	-12.797	-12.0153	-8.37395	-8.04695	-5.98529
624.5	850.5	11.1651	4.54786	-4.50648	-7.75692	-9.90074	-9.59953	-10.8603	-8.51967	-12.5351	-9.77405	-7.41376	-11.1506	-10.439	-9.32066	-8.44532	-12.0215	-15.4188	-11.7166	-8.29612	-13.1351	-10.041	-9.73328	-10.0072	-10.143	-7.85948	-10.9866	-9.17797	-11.0592	-12.7985	-8.51674	-9.62241	-10.1926	-12.338	-10.7303	-5.56546	-10.5623	-8.47616	-10.672	-7.25722	-8.94871	-10.3173	-9.93252	-12.2699	-11.5486	-14.1111	-9.13791	-8.98151	-7.41709
625.5	850.5	11.1652	4.54786	-3.50834	-10.8269	-9.51962	-9.81282	-10.6444	-9.99083	-12.6568	-7.21278	-7.18702	-10.4792	-9.93714	-9.86586	-9.27724	-12.336	-14.1477	-10.9636	-9.80011	-10.3779	-9.43727	-9.38209	-11.7799	-11.4912	-6.87178	-10.0069	-7.89161	-11.4539	-11.8117	-8.81043	-9.40719	-8.58086	-11.8358	-11.8989	-5.5023	-10.764	-8.64155	-10.2496	-6.04829	-9.02784	-10.9961	-9.16703	-11.1056	-10.1663	-13.1932	-10.0502	-11.5901	-8.8764
621.5	851.5	11.1648	4.54777	-6.65555	-10.8882	-12.9067	-10.3505	-10.642	-9.49616	-13.0487	-7.95239	-8.94611	-7.18029	-8.44486	-6.25586	-10.1744	-8.93609	-9.4669	-10.9551	-9.33906	-12.8107	-7.52845	-10.5612	-10.7047	-10.111	-8.50658	-13.0226	-9.06296	-9.45551	-7.6628	-9.69259	-9.21102	-9.19961	-8.49606	-7.88274	-6.10706	-9.64234	-6.30368	-8.25633	-5.52228	-10.5141	-9.73561	-7.23487	-6.97816	-12.6823	-9.76331	-8.25176	-14.6876	-7.15724
622.5	851.5	11.1649	4.54777	-7.81675	-11.5884	-14.216	-10.1102	-10.9521	-7.61546	-13.1689	-10.4051	-10.0052	-10.2461	-9.12364	-7.15189	-11.2651	-9.05597	-11.0513	-11.527	-9.79085	-11.9763	-9.06604	-11.6363	-11.1845	-11.0376	-8.2432	-11.8763	-9.63476	-11.006	-7.85243	-9.06181	-8.26926	-10.091	-8.83202	-7.93572	-6.12637	-9.49016	-7.26446	-9.14374	-5.67538	-10.424	-8.76061	-6.99981	-7.65933	-13.8335	-8.89387	-8.31562	-12.8955	-6.23418
623.5	851.5	11.165	4.54777	-6.00141	-9.50903	-13.0705	-11.0329	-9.53504	-7.54678	-15.1402	-13.3727	-10.4631	-11.2232	-10.8482	-8.55237	-11.6599	-10.3849	-14.6429	-11.3365	-9.23336	-11.671	-10.4142	-11.8398	-11.2803	-9.09545	-8.38113	-11.379	-10.0685	-10.7551	-9.807	-7.8937	-8.29304	-10.1549	-10.2388	-8.99608	-6.01705	-10.0157	-8.72967	-10.6013	-7.25842	-10.8105	-8.69364	-8.66545	-10.4285	-14.1729	-9.79072	-8.80046	-10.0651	-7.5646
624.5	851.5	11.1651	4.54777	-3.78404	-8.85709	-10.8436	-10.9074	-9.55335	-9.20081	-15.525	-10.6143	-7.84744	-10.7082	-8.423	-10.2918	-9.32286	-11.0298	-14.0365	-9.45974	-8.97124	-10.7259	-9.93907	-10.1006	-12.3956	-8.64373	-10.4165	-9.47157	-9.67927	-10.6029	-10.9558	-9.05087	-9.0557	-9.46476	-11.3486	-10.7729	-5.62084	-10.2948	-8.43814	-11.1593	-8.9208	-11.6393	-10.3745	-11.1947	-13.6045	-14.2477	-12.8287	-9.50147	-9.8834	-10.2686
625.5	851.5	11.1652	4.54777	-3.33235	-10.9836	-10.0304	-9.4059	-11.2923	-10.7657	-13.122	-8.08835	-7.32051	-12.2288	-7.16479	-12.3184	-9.82432	-9.7221	-12.2498	-9.74351	-11.3398	-9.05984	-9.07682	-8.43282	-15.2172	-11.2752	-8.23115	-8.48586	-8.37045	-11.1991	-11.922	-8.95281	-9.10951	-8.90225	-11.4515	-11.3249	-5.98927	-9.49798	-8.76902	-10.8248	-7.9553	-11.9685	-13.7035	-10.4766	-13.1247	-12.2595	-14.128	-11.6721	-10.6784	-11.7357
333.5	645.5	11.1393	4.56651	-8.56663	-6.03976	-6.10509	-10.6652	-11.4553	-6.84913	-8.43461	-7.74878	-9.7872	-8.78901	-8.04905	-8.14504	-8.2761	-13.4816	-11.4461	-7.11003	-9.96476	-12.5599	-9.4076	-9.12726	-11.193	-17.568	-14.5269	-16.9704	-12.1037	-10.1823	-12.3403	-13.1698	-11.3714	-14.0106	-8.76739	-10.1923	-10.351	-8.95014	-9.4084	-8.2053	-7.5072	-8.8944	-13.1402	-10.763	-13.2817	-13.8961	-11.8378	-11.4852	-9.34989	-11.1266
334.5	645.5	11.1394	4.56651	-9.01441	-5.77939	-6.33125	-9.16728	-11.3771	-7.91521	-8.22437	-8.82042	-8.55574	-8.36801	-8.04847	-8.72906	-10.3276	-11.273	-11.6531	-5.05204	-10.0629	-11.5992	-10.6506	-10.6261	-12.7181	-17.1043	-12.3594	-13.8353	-11.6671	-11.0787	-10.9086	-11.599	-12.5662	-16.2051	-7.54166	-8.49528	-10.5175	-12.0008	-10.19	-6.84351	-9.5855	-8.03855	-12.7073	-11.8627	-11.1459	-12.0586	-9.39982	-9.87074	-8.88581	-12.1739
335.5	645.5	11.1395	4.56651	-8.81343	-6.83293	-7.22121	-7.70901	-9.90194	-7.83406	-8.82671	-10.6809	-9.5378	-8.41018	-9.48096	-8.51592	-12.5759	-8.00074	-12.1968	-5.91735	-10.6841	-12.6322	-11.8678	-12.0043	-11.1567	-15.7006	-10.7807	-11.2785	-10.2055	-10.8714	-10.1048	-11.9941	-10.5623	-13.4253	-10.079	-12.6304	-11.0721	-7.49763	-12.0742	-8.65101	-8.95453	-7.18863	-12.9623	-14.4546	-13.179	-10.7407	-9.56046	-12.2697	-13.1765	-14.4414
336.5	645.5	11.1396	4.56651	-8.36771	-8.90171	-8.16636	-7.20504	-7.92125	-7.82708	-10.2268	-12.6133	-11.2334	-8.44589	-11.3379	-7.04582	-12.084	-7.4833	-12.3124	-7.76632	-12.1215	-10.9977	-11.3477	-11.1485	-9.91846	-15.0646	-11.0068	-9.33826	-8.87726	-10.1253	-9.16128	-12.6389	-9.90936	-11.826	-11.5819	-7.94591	-8.9995	-6.55432	-14.5824	-9.66307	-6.60338	-8.36118	-13.4914	-13.602	-14.1327	-12.9097	-10.671	-13.9988	-15.7716	-14.0679
337.5	645.5	11.1397	4.56651	-7.58076	-9.09535	-9.51082	-7.56089	-7.01151	-8.66436	-10.5238	-11.3732	-11.5583	-8.79528	-10.5388	-6.44174	-9.26013	-8.58189	-11.8013	-8.4207	-12.5017	-9.27683	-10.7892	-10.3886	-8.9752	-13.9036	-14.0615	-8.67585	-10.203	-10.5515	-8.56532	-11.2674	-11.4935	-12.6167	-11.6354	-7.09012	-7.26089	-4.9345	-13.615	-7.96804	-4.71852	-6.74121	-13.4512	-11.2728	-14.0828	-13.1662	-11.2731	-14.6147	-13.0866	-12.934
338.5	645.5	11.1398	4.56651	-6.80213	-6.66456	-9.93236	-9.02559	-7.33494	-10.6171	-9.73836	-8.94316	-11.6026	-9.25705	-9.77435	-7.23169	-6.86231	-9.07163	-10.6421	-8.83273	-13.8109	-10.6343	-10.5526	-11.7977	-10.31	-12.2783	-17.0842	-8.79541	-11.724	-9.52052	-8.1043	-11.4268	-13.178	-9.28006	-12.4493	-9.14087	-7.22154	-5.13583	-12.3869	-8.58079	-5.65488	-6.6463	-11.121	-10.2219	-13.4502	-11.153	-11.7944	-12.5034	-11.6081	-13.2105
333.5	646.5	11.1393	4.56643	-7.87708	-6.00745	-7.93365	-8.54745	-10.578	-6.08301	-9.46949	-6.58174	-9.54533	-11.1928	-8.91275	-10.3799	-6.55433	-12.1593	-11.0624	-7.64751	-12.6896	-10.4044	-9.80663	-8.85171	-12.1011	-16.0358	-12.1259	-16.2299	-10.4769	-9.85019	-13.0411	-14.0846	-10.5791	-13.6205	-7.15034	-10.2527	-8.17507	-9.93729	-8.08661	-6.46178	-8.10217	-7.57098	-13.5748	-12.3864	-12.8135	-12.3413	-12.0189	-13.1064	-7.83466	-10.3342
334.5	646.5	11.1394	4.56642	-8.90987	-6.52623	-7.16384	-8.45899	-10.5158	-8.14255	-9.70358	-7.3223	-9.60974	-10.782	-9.17692	-9.8644	-8.5437	-10.4106	-12.684	-6.06495	-12.3099	-8.75916	-10.1632	-10.1799	-13.9442	-13.2834	-11.5521	-11.9594	-10.6976	-9.93078	-12.3455	-13.2953	-14.8877	-15.62	-7.4425	-8.77556	-7.58972	-7.1115	-9.95357	-6.18358	-10.4598	-6.74415	-15.2249	-14.3156	-12.2474	-12.9163	-10.3882	-11.9912	-7.66928	-10.3493
335.5	646.5	11.1395	4.56642	-9.39751	-7.62544	-7.23718	-8.45167	-10.3114	-8.22315	-9.58304	-9.03018	-9.15567	-10.5806	-10.8803	-9.07403	-11.7514	-8.77411	-12.8465	-7.21809	-11.0409	-9.86925	-9.38985	-10.7715	-11.7442	-13.0551	-11.492	-9.72718	-11.8613	-11.1314	-9.49813	-14.9112	-12.061	-13.9028	-9.70506	-13.2412	-9.41254	-6.34271	-12.5769	-9.22869	-12.3633	-6.60114	-13.4603	-13.9663	-16.9133	-12.7624	-9.81913	-11.9064	-14.036	-11.9133
336.5	646.5	11.1396	4.56642	-9.09691	-9.31883	-9.7166	-8.05435	-9.518	-8.13499	-10.467	-11.3555	-9.77185	-10.574	-12.0692	-8.28715	-13.3557	-8.35375	-13.5811	-8.94042	-11.988	-12.1348	-8.62354	-8.93589	-9.53254	-14.5512	-11.3676	-9.52931	-11.1913	-9.83811	-8.02842	-13.0855	-10.4505	-11.5822	-11.2	-8.09609	-8.425	-5.02182	-15.5208	-9.55396	-8.69305	-8.06895	-15.1549	-13.622	-14.7806	-13.0989	-9.97804	-12.8825	-15.6418	-14.3865
337.5	646.5	11.1397	4.56642	-8.1562	-8.18728	-11.3805	-8.35182	-8.00591	-8.97748	-11.1059	-12.4982	-10.972	-11.2256	-9.44651	-7.38379	-11.8838	-9.32355	-11.8864	-8.54264	-11.69	-11.8957	-9.09658	-8.51188	-8.78066	-14.2939	-12.7109	-9.58822	-13.8234	-9.3701	-9.03437	-10.9376	-10.3772	-11.857	-10.4922	-7.83991	-6.19221	-4.11475	-14.6482	-8.32574	-5.12514	-7.98036	-12.7986	-10.4022	-13.7973	-12.3236	-10.0329	-11.5602	-12.6384	-13.6522
338.5	646.5	11.1398	4.56642	-6.32073	-5.75306	-10.4845	-9.89333	-7.56748	-10.3117	-8.64267	-8.10871	-9.87142	-11.7165	-8.71927	-6.79562	-8.36809	-10.5986	-9.95526	-8.96401	-12.3687	-11.6346	-10.8224	-10.7076	-10.7073	-13.2473	-15.4464	-8.91412	-12.5788	-8.91257	-7.0406	-8.96786	-10.3892	-9.49722	-11.5405	-9.94703	-6.80942	-6.68222	-11.1832	-8.9716	-5.28127	-7.57144	-9.55959	-9.9605	-14.4125	-11.2687	-9.59943	-9.65809	-10.6041	-12.6466
333.5	647.5	11.1393	4.56634	-5.71633	-7.79167	-10.6766	-6.2511	-9.5066	-6.80194	-9.92208	-7.98955	-8.67577	-11.5703	-7.80585	-10.8802	-6.0484	-11.1206	-11.1543	-8.58874	-14.9049	-10.167	-11.3775	-9.46729	-10.9218	-14.4056	-10.1034	-11.977	-8.44496	-10.3918	-11.0699	-12.0494	-11.5786	-12.5751	-8.20563	-9.32082	-7.07056	-8.85984	-8.86389	-6.85221	-8.38509	-8.02069	-12.8649	-10.0254	-10.3508	-11.4449	-12.7318	-14.4124	-8.83057	-9.43004
334.5	647.5	11.1394	4.56633	-5.1136	-8.82823	-8.30775	-6.45079	-9.99988	-9.22105	-10.182	-7.63934	-10.2225	-10.4686	-7.74474	-10.1545	-7.21109	-10.6513	-13.5888	-9.42602	-13.9874	-8.66724	-9.41774	-9.79275	-13.2673	-11.2069	-10.1606	-10.026	-10.1406	-9.25157	-11.0355	-10.9354	-15.9919	-13.0849	-7.67503	-9.74577	-7.18372	-6.71237	-11.6616	-6.72337	-10.6284	-7.39026	-16.6249	-10.1522	-11.0012	-14.5117	-11.1884	-14.2921	-8.79998	-7.65485
335.5	647.5	11.1395	4.56633	-5.07998	-9.15611	-7.73018	-7.84252	-10.6045	-10.2331	-10.5798	-8.82486	-10.1053	-10.0159	-8.71721	-10.0177	-10.2717	-9.01144	-12.0749	-12.8693	-12.8409	-8.98558	-8.02465	-10.2494	-11.3109	-10.5969	-12.586	-8.80947	-12.8086	-8.75176	-8.54907	-12.3804	-12.9967	-12.5365	-9.38468	-10.3218	-8.96985	-5.64411	-13.7601	-8.95961	-14.811	-8.05373	-11.4679	-11.0103	-13.5534	-17.2511	-9.53782	-13.4305	-16.8278	-9.17328
336.5	647.5	11.1396	4.56633	-6.78569	-9.77007	-9.69524	-8.92061	-10.8647	-10.0439	-11.0453	-12.2027	-9.62385	-10.9067	-9.32339	-10.3578	-12.7465	-7.41334	-11.4512	-13.0222	-12.4253	-12.087	-7.71698	-8.27644	-9.2921	-12.6493	-13.0907	-9.64923	-14.7184	-8.01663	-7.71504	-12.4948	-10.7476	-10.4528	-10.8338	-8.15672	-8.6903	-3.9031	-14.335	-10.0225	-13.7569	-8.77551	-13.9757	-12.2845	-13.1675	-15.8025	-9.50562	-13.2563	-13.8915	-12.0925
337.5	647.5	11.1397	4.56633	-7.97926	-8.18039	-12.2339	-9.68412	-8.95166	-9.4522	-9.88784	-12.379	-9.56841	-11.6553	-8.83004	-10.2917	-12.7744	-6.95962	-9.87464	-8.98664	-10.3935	-11.9887	-8.27675	-7.8807	-9.30277	-14.3906	-12.7821	-11.9898	-13.7488	-8.17183	-9.13311	-12.4401	-8.77266	-11.7495	-10.1786	-8.26855	-6.49247	-5.79174	-10.6549	-10.0571	-11.1373	-9.91553	-12.2478	-10.0241	-14.3158	-10.8881	-11.3801	-9.3219	-11.1869	-11.3377
338.5	647.5	11.1398	4.56633	-6.90488	-6.34456	-12.7206	-11.7876	-7.8594	-8.97982	-6.94504	-8.47085	-7.96191	-12.3503	-8.26117	-8.97095	-8.56625	-9.11754	-8.04438	-8.38554	-9.61079	-10.0038	-10.5744	-10.2028	-11.0042	-12.8253	-13.2749	-11.2447	-11.3639	-9.06807	-7.82041	-10.3134	-7.62223	-10.469	-12.4658	-10.3155	-6.98184	-8.82018	-8.30741	-11.3508	-8.71733	-8.05212	-8.29108	-10.4462	-11.753	-9.38643	-9.30656	-8.38311	-9.85622	-10.8975
333.5	648.5	11.1393	4.56625	-5.15706	-8.14139	-10.1861	-5.70677	-10.4222	-8.43875	-9.08388	-7.79844	-9.46347	-9.79239	-6.43065	-10.4179	-7.25716	-10.458	-12.1836	-9.01558	-11.9466	-11.6872	-12.0557	-10.7833	-9.88742	-11.4765	-8.83742	-9.87252	-8.39267	-10.9425	-10.5844	-11.9211	-12.3117	-8.79932	-10.8575	-9.37102	-7.41957	-6.91563	-11.5029	-9.15156	-7.77568	-8.72275	-13.0976	-9.28227	-8.91018	-11.0642	-12.9988	-15.0897	-10.776	-9.33786
334.5	648.5	11.1394	4.56624	-4.12313	-9.68056	-9.09148	-5.87832	-9.81471	-9.79555	-8.64193	-6.90179	-9.91093	-7.9463	-6.80501	-10.455	-7.05274	-10.9858	-11.8706	-11.6275	-12.0732	-11.1313	-9.3089	-10.8357	-12.7278	-11.5963	-9.44521	-9.09886	-9.55178	-9.54783	-10.8782	-10.3509	-13.7122	-9.18524	-8.35988	-11.024	-8.60534	-4.7418	-13.4499	-8.64902	-9.32626	-8.27669	-13.1427	-9.26704	-9.77101	-14.4008	-11.4763	-15.4481	-11.4886	-7.81037
335.5	648.5	11.1395	4.56624	-4.60061	-10.4712	-8.98621	-6.90394	-9.10715	-10.6899	-8.97444	-8.23805	-9.56471	-7.24387	-8.16124	-10.1244	-9.09276	-9.34168	-9.61343	-14.4627	-12.2488	-10.0701	-8.17468	-11.0625	-11.999	-9.61715	-12.1224	-8.02611	-10.8039	-8.01216	-9.45635	-11.3738	-11.5375	-11.3068	-9.76798	-10.2339	-9.25288	-4.00549	-13.4553	-10.0734	-12.8015	-8.71006	-10.022	-9.92984	-10.8639	-14.5687	-9.39031	-18.1966	-14.8256	-9.04308
336.5	648.5	11.1396	4.56624	-6.6827	-10.6419	-10.4587	-7.11842	-9.17606	-10.677	-9.11142	-10.4363	-9.78486	-9.5152	-9.11572	-11.0093	-10.9392	-7.19326	-9.30981	-14.236	-10.8868	-10.1913	-8.07448	-9.75464	-9.89311	-10.4806	-12.3886	-8.39904	-14.5737	-7.20843	-8.68712	-12.825	-10.8922	-11.3037	-10.0485	-9.48342	-9.06789	-5.74359	-14.0247	-11.367	-11.6232	-9.60501	-12.157	-11.7495	-11.0525	-14.6077	-9.51594	-13.0831	-11.3241	-10.8015
337.5	648.5	11.1397	4.56624	-8.30679	-9.24775	-12.4785	-8.92445	-9.00108	-9.11701	-7.61902	-10.696	-9.04062	-11.2617	-8.98567	-13.2914	-10.8468	-6.49646	-9.12528	-10.3716	-8.97658	-11.1876	-8.2567	-9.09632	-9.66787	-13.8352	-12.7332	-11.1232	-11.6907	-7.54939	-9.78383	-13.5209	-8.814	-12.8602	-9.26041	-10.2185	-8.3135	-7.3647	-9.85941	-12.6984	-10.2325	-11.2656	-12.4675	-10.575	-12.7347	-10.3787	-10.4248	-9.41596	-11.5855	-9.81656
338.5	648.5	11.1398	4.56624	-8.54799	-7.71822	-12.6438	-11.3705	-8.9317	-8.26337	-5.96405	-8.60586	-7.81763	-11.8179	-8.17096	-14.0457	-8.15626	-7.98116	-8.38897	-8.94785	-8.69635	-9.86313	-9.74764	-9.8264	-10.7147	-13.117	-11.6079	-14.1993	-11.2895	-8.93818	-10.4196	-12.801	-7.72823	-12.5483	-9.66679	-10.6658	-8.8714	-6.03126	-8.53319	-11.9519	-9.54836	-8.83875	-9.42386	-9.76577	-9.28231	-8.42963	-9.52442	-9.65486	-11.0583	-8.938
333.5	649.5	11.1393	4.56616	-6.493	-7.80302	-8.62285	-7.25239	-12.4604	-9.80781	-8.60682	-6.64759	-12.0005	-9.27464	-6.30037	-9.28846	-7.8736	-8.89951	-11.44	-10.9969	-10.6922	-14.4803	-11.8774	-11.3852	-10.3867	-9.76095	-9.68809	-10.2636	-9.71305	-10.6235	-12.6598	-13.2076	-10.7276	-9.31075	-10.2767	-8.34533	-9.19341	-5.30428	-11.7321	-11.0877	-8.90637	-9.35572	-13.3188	-10.522	-9.34297	-9.90369	-11.4238	-14.7975	-10.657	-11.2689
334.5	649.5	11.1394	4.56616	-5.6425	-9.16452	-8.7943	-7.8545	-9.47927	-10.9506	-7.1419	-6.46183	-10.7105	-7.06264	-6.2683	-9.28504	-7.04551	-11.1606	-11.453	-11.889	-10.6332	-13.2109	-10.5802	-12.823	-13.4911	-11.1976	-10.7696	-10.691	-8.59306	-11.227	-11.6632	-12.9252	-11.2816	-8.1439	-8.4952	-10.7577	-11.1412	-5.27513	-11.4438	-9.9723	-10.0805	-9.2177	-12.4702	-10.2887	-9.28324	-12.2931	-11.7899	-12.4018	-12.5549	-11.1771
335.5	649.5	11.1395	4.56615	-6.45585	-10.7611	-9.34276	-8.05571	-8.68966	-10.6969	-7.61674	-7.45559	-9.07869	-7.58347	-7.79525	-8.40609	-8.14979	-9.54153	-9.88843	-11.6023	-10.5028	-10.8965	-9.83451	-14.0287	-13.5353	-8.97816	-11.9982	-9.21618	-9.06716	-9.73649	-10.7309	-13.3532	-9.76844	-10.7948	-9.82136	-12.0481	-10.5173	-6.77489	-11.81	-10.123	-12.4482	-9.30045	-10.7958	-10.7906	-8.81988	-13.1738	-10.4545	-11.9545	-13.4254	-12.2981
336.5	649.5	11.1396	4.56615	-6.88811	-11.9028	-10.3687	-7.55168	-9.36038	-8.35422	-7.57781	-8.25388	-9.40278	-9.47172	-10.5964	-8.57501	-10.7669	-7.00283	-9.43164	-12.3232	-9.62246	-9.55507	-9.30523	-13.1311	-10.6091	-9.10683	-11.53	-8.14171	-12.6691	-8.12973	-9.95305	-12.891	-9.5026	-12.5792	-10.4469	-9.94938	-8.87188	-7.03795	-13.2223	-12.178	-10.8598	-10.1042	-10.8953	-12.1529	-9.61804	-12.2779	-10.4151	-11.8091	-10.6797	-12.465
337.5	649.5	11.1397	4.56615	-8.07535	-10.6189	-10.7743	-9.11822	-10.3476	-6.80873	-7.05729	-8.22137	-10.3606	-11.2099	-10.9666	-10.2862	-11.4764	-7.22903	-10.3052	-11.8861	-9.1605	-10.4027	-8.95103	-11.8594	-10.6111	-11.5883	-10.561	-8.51104	-10.2247	-8.02628	-10.5517	-12.5877	-9.73854	-13.7715	-9.9139	-10.4213	-9.55155	-5.30564	-12.1546	-13.7768	-10.2274	-10.3516	-10.5692	-11.9755	-10.6135	-10.2296	-10.609	-11.0849	-11.3141	-10.8476
338.5	649.5	11.1398	4.56615	-10.1263	-9.05682	-9.14198	-11.4016	-10.4419	-6.4278	-6.81945	-8.72373	-9.29656	-11.4801	-8.78471	-11.5447	-9.5774	-8.0811	-10.5095	-9.99069	-10.0669	-11.8365	-9.76646	-11.1105	-11.4041	-12.1606	-9.61186	-10.4044	-8.96802	-9.31819	-10.3945	-11.8725	-10.4218	-12.5411	-9.64452	-12.6066	-11.0944	-5.45457	-11.6673	-10.7062	-9.44491	-8.85351	-10.6348	-9.87227	-8.52769	-9.08022	-10.1297	-10.7489	-11.8747	-9.06521
333.5	650.5	11.1393	4.56607	-8.23287	-7.89535	-8.30231	-10.5578	-11.9858	-10.9622	-9.00805	-6.09845	-10.5552	-8.80246	-7.21457	-8.31575	-7.4621	-8.63852	-10.3503	-14.4259	-10.5815	-13.1248	-12.0526	-11.8181	-12.0664	-11.2334	-9.62368	-10.9862	-12.2252	-10.5871	-12.6669	-11.4589	-10.1797	-12.667	-10.4272	-8.51545	-12.3037	-5.84524	-9.86049	-11.5208	-13.0057	-9.76626	-13.2691	-11.7901	-11.9617	-8.8529	-11.762	-13.0036	-12.1866	-13.9891
334.5	650.5	11.1394	4.56607	-8.40938	-8.08206	-7.66343	-10.7589	-9.12988	-13.8449	-6.7222	-6.39422	-10.81	-7.55468	-6.78935	-7.91942	-6.87421	-10.9234	-11.8595	-12.9406	-11.8855	-12.4591	-12.2666	-14.3676	-14.846	-11.192	-10.5688	-12.9177	-10.0366	-12.1771	-11.4692	-12.8294	-9.85922	-11.1616	-8.24581	-10.4824	-13.3197	-7.68493	-9.06608	-9.95183	-12.7285	-10.7103	-14.0498	-10.0897	-10.1608	-10.594	-13.9113	-10.4786	-12.3144	-14.8304
335.5	650.5	11.1395	4.56606	-7.07438	-8.54476	-7.92647	-9.39036	-9.37193	-10.5005	-6.421	-7.23816	-10.5321	-8.56854	-7.3919	-6.93686	-8.01551	-9.22163	-11.0287	-12.022	-10.84	-12.1611	-12.4155	-14.9708	-13.2785	-9.23784	-12.0577	-12.2102	-8.9042	-11.3632	-11.0583	-12.4365	-8.40827	-11.1615	-9.82576	-13.3876	-10.4934	-8.08841	-10.3032	-8.98927	-12.7231	-11.562	-12.2395	-9.71823	-8.22304	-12.3702	-12.6944	-9.72157	-12.6634	-14.7178
336.5	650.5	11.1396	4.56606	-6.01922	-9.9004	-8.94206	-9.09401	-11.3771	-6.83852	-6.88703	-7.7465	-11.2295	-10.3274	-10.0111	-6.5254	-10.7747	-7.04245	-11.289	-12.5463	-9.60275	-11.3581	-11.3171	-12.474	-10.6677	-9.46498	-11.563	-9.59185	-10.7845	-10.1393	-11.1872	-11.7304	-8.71788	-11.0297	-12.592	-9.46572	-8.54862	-5.85092	-12.1118	-10.7322	-11.3368	-10.295	-9.69194	-12.1406	-9.4737	-11.8202	-12.0317	-12.2133	-11.7745	-14.7838
337.5	650.5	11.1397	4.56606	-6.6049	-10.4016	-8.09518	-10.7054	-13.2393	-4.73813	-7.42658	-7.79067	-12.5442	-10.8486	-13.1316	-7.62919	-12.0798	-7.51329	-12.9401	-13.0418	-9.93496	-11.2105	-10.5806	-11.4081	-11.1692	-11.557	-9.69773	-8.17742	-9.98269	-9.94446	-10.9684	-12.4386	-11.2593	-11.2053	-11.7714	-9.12922	-9.41662	-5.15972	-12.6079	-12.6901	-9.98656	-8.77004	-8.262	-13.1654	-10.4634	-10.4682	-11.8881	-12.8699	-12.6558	-13.2866
338.5	650.5	11.1398	4.56606	-9.78099	-9.28555	-6.31102	-12.1921	-12.6117	-4.62543	-8.16639	-8.72163	-10.4834	-11.2988	-10.0778	-9.27189	-11.2869	-9.53064	-12.7178	-11.8764	-12.5534	-12.4174	-11.5372	-12.0302	-12.4498	-11.9067	-9.68202	-8.67413	-8.41383	-11.0679	-8.33697	-11.0113	-13.483	-11.782	-10.3473	-11.8807	-11.6668	-4.94711	-12.477	-11.2212	-9.13191	-8.1908	-8.84939	-12.5678	-9.15922	-10.7216	-11.39	-10.148	-11.7758	-10.5474
245.5	753.5	11.1314	4.55693	-6.38366	-9.27491	-6.94572	-11.639	-9.03671	-14.7647	-8.44113	-9.63617	-10.6442	-13.8296	-9.53693	-9.73823	-8.56136	-11.0518	-13.9278	-9.49306	-11.7975	-10.9054	-12.5386	-14.8881	-12.0471	-12.5616	-11.5337	-11.3064	-10.1143	-7.49376	-7.94382	-8.39336	-12.2342	-10.7137	-7.41461	-12.0507	-10.6285	-5.78149	-11.4735	-12.4611	-7.88387	-9.41267	-10.4517	-9.24088	-9.72659	-10.5153	-9.94464	-11.8896	-11.351	-14.0692
246.5	753.5	11.1315	4.55693	-8.93026	-8.46306	-6.42332	-11.2605	-10.0589	-12.0731	-11.7232	-9.17838	-9.27762	-11.9999	-10.597	-10.1613	-8.45602	-9.69574	-10.9609	-8.60667	-11.6525	-11.1285	-13.2336	-9.42589	-10.4182	-12.5245	-10.1577	-11.9817	-13.1533	-8.07983	-7.27796	-9.16176	-14.1473	-11.5571	-10.0284	-13.9592	-11.1772	-6.88742	-9.33814	-9.98683	-8.17008	-10.1245	-14.9889	-10.5739	-12.3989	-11.1091	-9.94022	-12.7485	-11.6537	-12.7931
242.5	754.5	11.1311	4.55685	-8.29639	-9.29751	-8.77354	-10.3936	-8.27789	-8.24596	-6.70576	-11.8798	-8.82446	-10.4698	-10.6275	-10.0808	-8.50894	-9.42161	-11.4789	-12.552	-14.9604	-12.7813	-12.1793	-12.2035	-11.4733	-12.2101	-10.4318	-9.80208	-7.23804	-10.9082	-9.74923	-13.0627	-11.7796	-7.34081	-9.91384	-12.2516	-11.8348	-10.1005	-11.9989	-7.56754	-9.84475	-9.07537	-12.7501	-12.5549	-11.4012	-14.9463	-13.3775	-14.7835	-11.8338	-11.8325
243.5	754.5	11.1312	4.55685	-8.59899	-9.20542	-9.98655	-10.3524	-8.34992	-9.08215	-6.85034	-13.1006	-12.6592	-10.5717	-11.1607	-8.91501	-7.84219	-12.406	-12.6793	-12.5844	-13.3352	-12.8811	-12.3144	-10.8205	-10.9912	-13.6288	-9.85043	-13.1624	-10.5688	-10.3375	-9.4679	-12.0803	-10.8555	-8.06637	-12.1134	-10.4561	-11.376	-7.40585	-11.2582	-6.58091	-8.54833	-9.40154	-12.9902	-10.1258	-11.572	-14.7546	-12.7715	-14.287	-9.26852	-13.5092
244.5	754.5	11.1313	4.55684	-7.4182	-9.03408	-11.7301	-9.15959	-8.17212	-11.9766	-8.91609	-12.4416	-9.76597	-14.2131	-11.1501	-8.96213	-8.08315	-12.6898	-14.4516	-10.7802	-12.365	-12.4624	-10.3815	-11.8698	-12.167	-12.3576	-11.1847	-13.2635	-10.6371	-8.3436	-8.37179	-10.5603	-10.5354	-8.7037	-9.3517	-9.09984	-11.147	-6.21355	-10.6219	-8.39735	-8.2466	-8.83266	-12.6643	-9.15826	-10.504	-10.1232	-11.2321	-11.6514	-9.02476	-12.414
245.5	754.5	11.1314	4.55684	-5.91241	-8.36691	-9.12651	-9.02783	-7.74469	-12.7702	-10.9864	-11.3169	-8.16957	-14.5389	-9.47811	-10.7052	-9.09934	-10.8533	-13.5041	-10.4622	-11.8328	-14.8356	-10.9064	-15.5238	-12.4337	-12.393	-12.7531	-12.2199	-11.1302	-7.60448	-7.80372	-10.0679	-11.3198	-8.83225	-7.87198	-10.208	-11.5595	-6.4163	-12.5179	-12.0606	-8.53935	-9.69748	-14.2059	-9.1149	-10.6821	-9.20095	-10.2034	-12.4021	-10.5833	-14.4104
246.5	754.5	11.1315	4.55684	-5.85729	-8.9017	-7.59934	-9.70322	-9.04335	-11.7981	-12.2936	-10.2074	-8.657	-11.7737	-8.77662	-11.8891	-11.1042	-9.61407	-10.9274	-9.62946	-11.8225	-13.0932	-12.1569	-11.831	-9.81093	-12.6313	-10.6038	-11.8605	-12.2033	-10.2152	-7.36115	-9.13806	-14.4725	-10.4661	-10.9038	-12.8137	-14.1146	-9.21716	-11.1482	-10.7635	-10.1978	-11.0286	-17.6174	-11.3629	-13.0581	-11.3745	-10.5306	-13.0791	-13.3588	-15.2579
241.5	755.5	11.131	4.55676	-7.62066	-8.00296	-9.52902	-11.0046	-7.3161	-10.6063	-7.95173	-10.8026	-6.01832	-12.1294	-10.1889	-11.8841	-9.2322	-7.59994	-11.2624	-11.1086	-14.2708	-12.9548	-12.1114	-10.4867	-14.5167	-9.7047	-10.4145	-8.36242	-6.90198	-9.39057	-11.3124	-14.3167	-12.4092	-9.56458	-13.0355	-9.38835	-12.5901	-10.5162	-9.65748	-9.69148	-9.92274	-7.95002	-11.9239	-11.4881	-10.4195	-10.609	-10.4209	-12.4103	-11.1799	-11.3155
242.5	755.5	11.1311	4.55676	-9.49841	-8.60444	-9.04106	-11.5051	-6.42982	-8.14107	-6.48953	-10.7783	-8.2474	-10.1143	-9.60569	-10.6473	-8.6224	-9.17902	-12.7289	-10.2821	-13.2544	-13.1877	-12.0326	-12.8592	-16.2405	-10.9912	-10.7146	-10.347	-7.09745	-9.86912	-9.55359	-15.6626	-12.8231	-9.62347	-12.0095	-10.4604	-14.0167	-9.33458	-11.5862	-9.61724	-10.4745	-8.2296	-12.8292	-13.0716	-10.6813	-15.3374	-11.3605	-12.2643	-12.535	-11.6761
243.5	755.5	11.1312	4.55676	-9.82013	-8.79153	-9.22758	-10.2362	-7.26536	-9.24696	-7.40523	-11.7436	-11.5574	-9.36867	-10.7176	-9.92919	-8.15753	-12.087	-12.5049	-11.8976	-12.2645	-13.0514	-14.6628	-11.1208	-12.2932	-11.8943	-10.633	-13.0276	-9.777	-10.0742	-9.23666	-16.6647	-11.9978	-10.406	-11.8319	-11.8356	-12.9869	-7.72569	-12.8277	-8.09985	-8.91133	-7.77461	-13.2175	-11.7493	-10.7902	-14.7429	-12.311	-13.1768	-10.1894	-13.4825
244.5	755.5	11.1313	4.55675	-9.24012	-8.42529	-11.0024	-8.61909	-8.31343	-12.5042	-10.3597	-13.7258	-9.53567	-11.5793	-11.1467	-10.3707	-8.35821	-11.2408	-11.8787	-12.5435	-12.1743	-12.574	-12.1648	-11.4903	-12.7684	-11.2631	-10.7121	-14.2767	-12.8781	-9.55355	-9.42951	-14.91	-11.0029	-9.54455	-9.75773	-12.2764	-11.3847	-7.49542	-12.0573	-8.20724	-8.16217	-6.63668	-13.4644	-10.7363	-11.0043	-10.1158	-12.69	-12.2864	-9.41837	-14.0371
245.5	755.5	11.1314	4.55675	-7.04074	-6.91022	-9.34045	-8.79173	-7.84956	-13.096	-11.2809	-12.2224	-6.99005	-13.4804	-9.05732	-11.0099	-9.28067	-11.0109	-11.8337	-10.8081	-11.8891	-14.541	-10.4663	-13.5549	-11.6312	-11.03	-11.3958	-13.0172	-12.2677	-9.36221	-10.8417	-11.5182	-11.0513	-7.87992	-8.8346	-11.0942	-12.2511	-9.7561	-13.9787	-10.5585	-9.07243	-7.6811	-16.0678	-10.8353	-10.7462	-8.30283	-12.1631	-10.8278	-10.8225	-14.4014
246.5	755.5	11.1315	4.55675	-4.81196	-7.44293	-7.48442	-10.3015	-9.34233	-10.5567	-10.7303	-10.2502	-7.163	-12.2152	-7.82618	-11.2647	-10.6104	-10.7788	-10.4062	-10.5217	-11.2283	-14.4545	-10.2519	-12.6913	-9.27833	-11.4514	-10.1058	-12.9238	-11.0138	-11.6443	-8.83496	-8.44982	-13.0725	-8.96295	-11.5473	-10.9377	-15.324	-11.1947	-15.2639	-10.8367	-10.0394	-8.54348	-17.6525	-13.8516	-10.9247	-9.8234	-12.4028	-11.1728	-14.505	-13.4984
247.5	755.5	11.1315	4.55675	-5.70208	-9.38074	-6.86964	-10.2983	-11.5343	-9.96072	-11.4933	-9.35417	-8.27431	-11.0549	-8.11764	-11.0904	-9.41268	-10.9326	-8.91275	-10.914	-12.2187	-12.5118	-10.6325	-12.7606	-9.92586	-14.0978	-11.3572	-11.8172	-8.63082	-13.4223	-8.55405	-8.66667	-14.2573	-11.6717	-13.3863	-10.787	-13.6721	-9.08349	-13.9064	-11.2856	-8.27983	-8.3097	-14.0449	-15.5938	-10.4471	-11.5584	-15.3885	-12.0504	-15.9653	-12.2913
242.5	756.5	11.1311	4.55667	-9.56445	-10.5209	-9.26206	-10.5464	-7.79928	-8.61703	-7.11901	-11.0318	-8.65696	-10.5161	-9.6976	-9.8439	-9.0603	-10.1201	-12.5423	-9.38384	-11.1887	-12.2755	-11.0617	-12.1468	-13.0299	-11.6564	-10.3278	-12.5915	-9.69553	-10.3716	-9.41005	-18.4611	-11.7064	-11.6407	-13.4241	-9.30533	-15.3983	-9.54173	-13.8899	-10.3531	-9.70472	-8.87629	-12.4244	-12.3253	-10.545	-15.036	-11.2287	-12.1792	-13.0205	-12.4058
243.5	756.5	11.1312	4.55667	-10.0045	-10.7585	-9.20034	-8.6745	-7.43729	-9.28823	-8.21039	-11.2173	-11.8129	-9.21417	-9.44649	-10.0364	-8.80469	-12.8801	-12.0392	-11.4344	-11.3962	-12.3286	-16.0129	-9.65711	-10.9333	-12.8267	-10.6179	-14.9354	-11.2211	-10.7568	-9.83039	-18.2102	-12.9885	-12.0057	-11.5365	-9.63675	-16.082	-9.15222	-15.2265	-9.18951	-8.32536	-7.38866	-14.7253	-13.1367	-11.0704	-15.3783	-12.1764	-13.7764	-11.9254	-14.6165
244.5	756.5	11.1313	4.55667	-9.95865	-9.21271	-10.1767	-7.40075	-8.38407	-11.1612	-11.3552	-12.7292	-10.9565	-9.6458	-8.97362	-12.2648	-8.94786	-10.436	-11.0098	-15.2714	-11.3234	-12.0333	-14.9778	-9.65149	-11.9142	-11.8414	-9.7976	-14.5141	-13.9434	-10.7292	-9.79349	-13.3653	-12.4727	-11.565	-12.8623	-13.5494	-14.5319	-10.2038	-12.051	-8.69637	-7.94675	-6.04615	-11.7857	-12.1474	-12.4618	-11.257	-14.282	-13.1661	-11.5405	-17.8841
245.5	756.5	11.1314	4.55666	-8.51461	-6.69053	-8.12662	-8.53868	-8.00113	-9.48258	-10.9658	-11.9393	-8.74069	-11.2394	-8.36667	-10.7935	-9.499	-10.3473	-10.6741	-11.5678	-11.9445	-10.773	-13.2963	-12.3219	-11.2543	-10.2373	-9.99827	-12.9689	-12.0747	-10.1171	-11.3113	-11.2921	-11.3408	-8.78317	-11.4657	-15.2452	-14.0148	-11.1043	-13.9567	-9.81254	-8.96073	-6.07115	-12.8704	-12.7845	-10.5217	-8.72577	-13.7831	-9.81267	-12.1788	-16.7305
246.5	756.5	11.1315	4.55666	-5.34238	-5.93325	-8.00564	-9.90614	-10.0371	-7.66313	-9.42196	-11.0213	-9.34239	-12.3867	-8.01486	-8.93452	-10.5539	-10.3931	-9.55345	-10.5366	-11.0903	-10.9806	-10.341	-11.7236	-9.47108	-9.96536	-8.9533	-12.5618	-11.578	-12.4663	-8.69163	-7.86742	-12.0581	-9.11626	-13.4194	-12.353	-13.8618	-9.20423	-15.6235	-8.99919	-9.23294	-6.1446	-15.1293	-16.5209	-8.65359	-8.81196	-13.172	-8.64051	-15.1723	-12.976
247.5	756.5	11.1315	4.55666	-6.22162	-7.47824	-8.1982	-10.312	-13.3752	-8.97287	-10.8618	-9.87285	-10.4309	-10.8992	-7.40496	-8.97669	-8.50073	-10.3412	-9.03827	-10.1533	-11.2346	-11.7144	-10.4955	-11.428	-9.90469	-10.8676	-9.5321	-11.7427	-10.5641	-13.9518	-8.31235	-7.95008	-12.3359	-11.649	-13.6879	-10.9455	-12.3911	-7.80253	-13.5293	-9.04896	-8.04906	-6.88332	-12.7643	-18.9858	-9.88792	-11.3121	-14.2678	-10.215	-14.9294	-12.4957
242.5	757.5	11.1311	4.55658	-6.88895	-12.0318	-10.8319	-11.0657	-9.21199	-7.7427	-8.699	-11.2507	-8.91532	-10.0759	-9.53415	-10.7529	-10.0963	-10.8472	-13.1833	-10.0566	-11.2733	-11.4559	-11.3601	-8.51638	-10.6324	-13.5014	-10.7816	-14.1195	-14.3169	-10.2793	-9.21681	-18.4724	-11.4255	-12.7386	-11.6614	-9.39851	-13.7509	-10.4278	-15.2452	-10.3204	-10.4333	-9.66477	-12.3425	-13.4056	-11.4998	-15.0034	-11.9546	-13.1091	-11.3733	-14.5132
243.5	757.5	11.1312	4.55658	-9.53379	-11.5909	-11.2962	-9.1966	-8.26596	-8.53389	-9.32523	-12.6086	-11.4869	-9.85385	-8.13126	-9.91342	-8.57132	-13.4021	-12.9001	-12.3466	-11.7629	-11.7037	-12.9975	-6.83522	-9.67453	-13.713	-11.6185	-13.178	-13.6123	-9.90548	-11.247	-15.7883	-12.509	-13.5998	-9.80599	-9.9897	-15.3429	-10.855	-13.5306	-9.87229	-7.22452	-8.2654	-15.5887	-14.0301	-12.3144	-14.4182	-12.1222	-13.9924	-10.3255	-15.6285
244.5	757.5	11.1313	4.55658	-9.95592	-9.74095	-9.96536	-7.61269	-8.40361	-10.3325	-9.79623	-11.8154	-11.1842	-9.25557	-7.12564	-9.01084	-8.52753	-10.6826	-12.1806	-16.3092	-11.2509	-13.1296	-12.1889	-7.77685	-11.1635	-13.5163	-9.7559	-12.4368	-12.7852	-9.75918	-11.2195	-13.0448	-12.436	-13.0673	-12.0311	-11.9174	-17.6667	-11.7265	-10.3846	-10.115	-7.01141	-7.7656	-13.1835	-14.0616	-13.1293	-11.0629	-13.2275	-13.399	-12.4304	-18.9953
245.5	757.5	11.1314	4.55657	-8.57587	-8.09764	-7.60482	-9.68346	-9.88705	-8.87664	-10.0855	-12.324	-12.1932	-10.0881	-7.26043	-9.88688	-10.3722	-9.33413	-11.1637	-12.4119	-11.774	-9.83775	-13.1625	-11.0013	-12.7224	-11.1611	-9.69749	-10.5075	-10.0084	-9.73636	-10.1154	-13.9135	-11.2359	-10.8318	-14.1478	-16.6851	-12.332	-10.0751	-12.6146	-12.2256	-8.75428	-6.81772	-12.3765	-15.2216	-11.0231	-9.26889	-13.5037	-9.18956	-14.5505	-18.1296
246.5	757.5	11.1315	4.55657	-7.13143	-7.16603	-8.57153	-9.5599	-11.9594	-7.56065	-8.9235	-13.6787	-14.2775	-10.7163	-6.82085	-7.92997	-13.0397	-9.17681	-9.54526	-10.8844	-10.2219	-9.32623	-11.2683	-11.4589	-12.2157	-9.17398	-9.1032	-9.82072	-11.5698	-12.932	-7.92954	-9.38817	-10.3468	-9.14194	-15.0509	-14.6485	-10.6684	-8.06132	-13.4957	-9.48047	-8.62291	-5.80869	-13.392	-16.5326	-7.89376	-8.7415	-12.5944	-6.67449	-15.2588	-14.4361
247.5	757.5	11.1315	4.55657	-7.30866	-7.57672	-11.0141	-10.2668	-12.6085	-9.28373	-9.47148	-13.2579	-13.3877	-10.8101	-5.89564	-7.30427	-9.59862	-9.79002	-10.0656	-10.1175	-9.92861	-11.2853	-10.6022	-11.2393	-13.1189	-8.79914	-9.53647	-9.97277	-13.7252	-12.8844	-7.5956	-8.36729	-9.33174	-8.99944	-12.9737	-11.5024	-11.2875	-8.19764	-11.6037	-8.81625	-8.70955	-7.24161	-13.0493	-17.5022	-9.5747	-10.5785	-13.0722	-8.12449	-12.7442	-13.4912
242.5	758.5	11.1311	4.55649	-5.55354	-10.2802	-10.6719	-11.5936	-9.18553	-7.98438	-10.5229	-11.5029	-10.3244	-10.1972	-9.41255	-12.2608	-11.2109	-11.0713	-14.538	-11.6108	-12.854	-10.3962	-12.1055	-8.30653	-10.8558	-15.2969	-11.8046	-14.9807	-13.9522	-8.79792	-9.80056	-13.212	-12.7128	-11.5415	-11.6145	-10.547	-11.1119	-12.6253	-12.0045	-12.4832	-12.5402	-9.20585	-11.849	-16.4463	-14.2547	-15.7093	-14.3289	-11.8181	-9.24831	-15.3565
243.5	758.5	11.1312	4.55649	-8.98814	-10.9075	-11.4828	-10.7272	-8.61527	-8.86997	-10.2709	-11.9349	-11.3521	-10.3679	-8.46823	-10.3515	-9.64574	-12.9067	-14.0443	-14.0567	-12.6195	-11.345	-11.9794	-7.17769	-9.21087	-12.3371	-13.6827	-12.8409	-14.6635	-7.2946	-12.4032	-13.7223	-13.4611	-11.0324	-10.6186	-11.0442	-12.6852	-11.7675	-14.9815	-12.5756	-9.27197	-9.01916	-12.0589	-11.7896	-14.2486	-13.9485	-16.4304	-12.4992	-8.61964	-14.8537
244.5	758.5	11.1313	4.55649	-8.88773	-9.96147	-9.75624	-10.1487	-8.93283	-10.0823	-8.80718	-11.2143	-11.1064	-8.7536	-6.94138	-7.57645	-8.80341	-11.6999	-13.5442	-15.1602	-11.8883	-14.5815	-12.1177	-8.30285	-10.6573	-11.6131	-13.1091	-11.7743	-12.8902	-7.54273	-11.5918	-13.2842	-12.5259	-11.5411	-11.1011	-11.8723	-15.1119	-10.8347	-12.3672	-12.1779	-8.58458	-10.1921	-12.6157	-11.1573	-14.2339	-11.8601	-16.2483	-12.8058	-10.2982	-15.0586
245.5	758.5	11.1314	4.55649	-6.57801	-9.44906	-8.4217	-10.8998	-9.91878	-9.08657	-8.42507	-11.9582	-11.4768	-7.35522	-6.21088	-7.04774	-9.96612	-9.29458	-12.6093	-13.3724	-12.5287	-10.8192	-13.2198	-10.9815	-13.6217	-11.2034	-11.7708	-9.43162	-10.5813	-9.60493	-9.09726	-13.5947	-11.7498	-10.3452	-13.2843	-13.2552	-11.609	-8.65852	-13.0982	-12.8844	-10.5173	-9.33687	-12.9707	-12.4346	-13.028	-10.4595	-14.23	-10.7394	-12.1773	-14.552
246.5	758.5	11.1315	4.55648	-5.71956	-9.669	-9.75289	-8.84834	-10.0844	-9.25557	-8.09224	-10.8722	-12.0547	-7.36413	-5.31867	-7.10877	-11.6061	-8.89187	-10.9853	-12.2513	-10.4584	-9.71428	-12.3949	-11.9114	-14.4355	-9.14996	-10.2654	-8.56597	-11.6031	-12.8576	-7.31041	-10.1877	-10.5609	-8.29875	-14.1382	-11.9223	-10.1478	-8.21348	-12.6657	-10.7742	-8.43876	-7.88012	-12.9131	-13.9659	-10.5197	-9.34933	-13.1515	-8.12882	-13.3532	-15.5719
247.5	758.5	11.1315	4.55648	-6.79545	-9.31243	-13.7492	-10.1663	-9.4473	-9.30006	-8.35139	-10.8858	-9.91016	-9.88918	-5.20971	-6.96781	-9.93032	-9.97663	-11.7769	-11.3786	-9.77156	-10.2815	-10.6692	-11.8951	-14.0973	-8.70039	-11.1972	-8.53848	-14.2676	-13.0923	-7.06397	-8.8622	-8.75155	-7.18491	-12.057	-9.61725	-10.7528	-10.288	-10.6317	-9.89646	-9.25226	-9.15257	-13.3805	-13.8091	-10.8538	-10.4512	-12.4562	-8.26754	-14.226	-14.91
242.5	759.5	11.1311	4.5564	-4.68759	-9.13486	-8.12805	-12.6655	-10.3806	-11.2427	-12.1568	-11.4755	-10.152	-10.6433	-9.86131	-10.1326	-11.4632	-11.7465	-12.9156	-12.1896	-12.9325	-9.84845	-10.5919	-10.7916	-10.2913	-14.9511	-12.9126	-13.7424	-13.284	-8.45467	-10.4423	-9.2307	-14.9083	-10.5056	-13.4001	-11.2355	-9.05089	-11.6902	-10.0405	-14.3037	-12.4425	-7.64373	-10.3683	-14.6203	-15.6154	-14.8344	-16.1784	-8.82273	-9.23057	-14.4532
243.5	759.5	11.1312	4.5564	-7.65826	-11.1552	-8.53307	-11.4587	-9.523	-10.6088	-11.0173	-12.2099	-10.6006	-10.6507	-9.8623	-9.85865	-12.9612	-11.8633	-14.3098	-14.0225	-12.3173	-11.1187	-11.4344	-10.9069	-7.48949	-12.5974	-15.898	-12.6291	-14.0165	-6.229	-11.6836	-10.8063	-14.018	-10.0805	-14.6579	-10.203	-11.5059	-10.3336	-13.0358	-16.2911	-10.9046	-9.05136	-9.47089	-11.0255	-16.6868	-13.4537	-17.8962	-10.7406	-8.41433	-14.2355
244.5	759.5	11.1313	4.5564	-6.74178	-10.4883	-9.04909	-11.205	-8.84609	-9.45474	-8.33867	-11.897	-11.1224	-7.98485	-8.14335	-7.83806	-12.7508	-11.0439	-12.5658	-12.5851	-11.279	-13.161	-11.9671	-11.4782	-9.05049	-10.3963	-13.8194	-11.8758	-12.8092	-6.35983	-10.4085	-11.9376	-13.8205	-9.92372	-14.9803	-9.25239	-14.9553	-9.08543	-14.931	-14.315	-11.6351	-12.474	-10.5178	-9.4085	-16.514	-14.0695	-18.379	-12.4671	-8.35783	-12.6747
289.5	776.5	11.1353	4.55483	-3.84766	-14.8237	-9.56414	-8.00212	-9.33335	-10.1142	-16.9644	-15.1819	-12.1397	-12.6952	-9.22302	-10.4343	-11.5807	-9.58133	-12.0523	-5.40334	-7.32087	-7.03044	-6.60666	-6.84775	-13.5832	-10.6586	-9.69975	-10.6759	-8.80087	-11.1083	-6.84525	-13.7911	-9.55238	-6.89502	-8.51824	-9.66107	-10.4416	-11.0407	-5.93874	-8.01822	-4.19847	-6.01593	-7.87836	-7.30612	-11.7139	-11.1969	-10.6628	-9.20437	-10.4147	-10.6944
286.5	777.5	11.135	4.55474	-5.28774	-11.8009	-13.4231	-7.9978	-8.78246	-7.76038	-10.7957	-11.027	-9.51827	-5.33168	-5.20351	-9.99034	-8.57881	-8.54497	-7.69696	-11.1492	-9.84935	-11.9379	-11.2336	-10.3398	-12.5441	-7.12609	-7.06543	-10.7283	-7.78274	-10.0084	-6.0596	-10.7524	-10.6307	-6.97061	-11.0965	-9.90818	-10.3996	-5.41578	-6.50971	-5.8968	-11.7263	-6.30495	-5.33938	-9.88691	-11.3641	-10.3566	-12.3522	-11.8732	-12.9224	-11.2797
287.5	777.5	11.1351	4.55474	-4.77476	-12.9137	-14.034	-8.61455	-7.38675	-9.34777	-11.7524	-10.7276	-8.9258	-8.3854	-6.77287	-12.7771	-9.81851	-11.6162	-8.93946	-8.51176	-10.4999	-12.7116	-9.41395	-9.21252	-12.0524	-7.59796	-8.3227	-9.59091	-5.59577	-10.1496	-6.05508	-14.2207	-9.64168	-5.21024	-10.1982	-8.89414	-9.87178	-7.23679	-6.38684	-5.81057	-8.34343	-6.42601	-5.62187	-8.2296	-9.45788	-9.34472	-9.8472	-10.3328	-13.3995	-13.2245
288.5	777.5	11.1352	4.55474	-4.4496	-13.4709	-12.6466	-9.98061	-6.69221	-10.6337	-13.8281	-12.0254	-10.4306	-9.98479	-10.035	-10.9775	-12.2333	-12.3376	-11.0902	-6.58649	-8.85625	-10.7783	-8.41897	-7.84378	-10.7132	-9.70465	-8.66137	-9.78435	-5.58491	-10.6723	-5.89143	-14.8732	-9.33588	-5.71275	-10.1497	-8.82359	-9.66955	-9.12271	-5.84533	-5.36814	-5.6145	-4.55948	-7.00704	-7.68616	-8.197	-9.28887	-8.19527	-8.91334	-13.925	-11.3444
289.5	777.5	11.1353	4.55474	-4.56527	-15.0296	-11.008	-9.22359	-7.49301	-13.3195	-16.0514	-15.1221	-11.6409	-10.4697	-11.809	-9.60041	-13.5565	-10.7801	-10.5525	-6.22881	-9.30985	-8.2777	-8.02891	-8.11361	-9.56613	-10.6961	-8.41282	-10.2323	-7.25257	-11.3822	-6.85833	-17.0711	-10.5768	-9.95333	-9.31992	-8.88655	-9.4446	-10.809	-5.15008	-5.0598	-5.05481	-3.28564	-7.5882	-8.41863	-10.1058	-10.7359	-8.1897	-8.94568	-14.7273	-11.7369
283.5	778.5	11.1347	4.55466	-7.74146	-6.23978	-10.6405	-9.76467	-6.04329	-6.05935	-11.7102	-11.1718	-10.6537	-11.6448	-11.1417	-10.5656	-8.6585	-7.32953	-12.6966	-7.64911	-10.307	-12.0651	-16.0878	-11.6911	-8.34054	-13.4274	-8.02864	-10.1792	-10.7059	-11.1124	-6.5829	-11.4652	-14.0986	-16.2168	-12.8853	-11.7079	-11.1357	-3.07528	-12.2443	-9.39955	-8.11813	-11.7768	-10.4284	-10.5256	-11.4212	-13.6408	-13.0526	-12.0733	-7.89178	-9.47057
284.5	778.5	11.1348	4.55465	-6.5965	-7.12534	-11.7255	-10.2868	-8.87627	-5.35102	-13.4537	-10.8279	-10.8091	-8.15597	-9.23686	-9.84309	-11.094	-7.99523	-10.1299	-8.12305	-10.4306	-10.3508	-13.3001	-10.5004	-10.725	-10.5164	-7.94154	-9.52711	-12.3514	-12.1967	-5.86842	-8.89471	-15.3755	-14.7192	-14.1749	-11.5178	-12.294	-4.50511	-9.46418	-11.855	-8.6637	-14.4797	-11.0945	-10.8675	-13.7413	-16.4154	-13.6958	-13.2717	-10.2835	-10.3396
285.5	778.5	11.1349	4.55465	-5.10101	-8.65066	-12.0461	-9.53335	-9.35117	-5.40122	-12.1983	-9.64009	-12.1656	-6.78076	-6.52887	-8.55441	-11.2716	-8.46049	-8.25059	-10.0893	-10.2742	-10.3648	-10.7446	-11.6551	-13.0575	-7.86705	-7.5993	-10.3316	-11.2872	-10.8866	-6.56944	-8.45932	-12.9375	-11.933	-13.0534	-10.5916	-12.3507	-6.65346	-6.83167	-8.86158	-9.63439	-10.8996	-9.35811	-11.5546	-14.6693	-13.6635	-14.1457	-15.1992	-10.9781	-9.94024
286.5	778.5	11.135	4.55465	-4.48285	-11.029	-12.4353	-8.22124	-9.73339	-7.37074	-11.9528	-9.03712	-9.64903	-8.11139	-5.52671	-10.0127	-10.7954	-8.85477	-7.2204	-9.35078	-9.88696	-12.1098	-9.00999	-14.2216	-12.6794	-7.00468	-8.29164	-10.4272	-7.27358	-10.049	-8.65352	-10.7518	-9.93025	-8.38785	-9.44441	-8.18313	-12.1263	-6.60897	-5.23124	-6.84875	-9.65671	-8.12721	-8.13328	-10.9619	-11.218	-10.2593	-12.323	-13.2231	-11.2233	-11.3083
287.5	778.5	11.1351	4.55465	-4.85635	-13.3688	-14.078	-8.87199	-7.87789	-9.37405	-12.4054	-9.41638	-8.47795	-9.67683	-6.98542	-10.9432	-10.2641	-11.4601	-7.75216	-8.09749	-9.4708	-13.3387	-8.37858	-10.9253	-10.7628	-8.44932	-9.79109	-9.16293	-4.15788	-10.1583	-8.96179	-14.4586	-7.80368	-7.83233	-9.08651	-7.60717	-10.2722	-7.19566	-5.81353	-5.80048	-6.84945	-6.88764	-8.22333	-9.37333	-7.83528	-8.79242	-9.27592	-10.0995	-12.355	-12.8559
288.5	778.5	11.1352	4.55465	-6.09612	-13.4278	-15.465	-11.304	-6.33867	-10.9215	-12.3734	-11.1519	-9.28945	-8.90609	-11.7502	-9.51001	-10.7423	-12.8875	-9.25776	-7.79002	-9.35711	-12.1194	-9.81541	-7.70341	-8.83765	-11.4441	-8.67633	-9.4068	-3.98236	-10.2966	-7.41252	-19.0916	-6.53538	-9.1947	-12.5688	-7.23452	-8.70506	-8.77566	-6.11645	-5.6435	-5.23632	-3.6569	-7.94501	-8.79698	-6.3858	-9.47609	-6.76323	-8.39596	-13.7922	-12.7862
289.5	778.5	11.1353	4.55465	-8.45112	-13.6989	-12.9885	-11.546	-5.5072	-12.2929	-12.5859	-14.7204	-10.8343	-8.87272	-13.6669	-8.84454	-11.1854	-11.5919	-10.0803	-8.46197	-10.8754	-9.85776	-10.5586	-8.14666	-8.11831	-11.7156	-7.20635	-9.83249	-6.09696	-9.58514	-7.36396	-20.8019	-7.62719	-10.2867	-10.0339	-6.69562	-8.41577	-8.99751	-5.04541	-3.77122	-5.73867	-3.37043	-6.84545	-9.1566	-8.72636	-10.3383	-6.59291	-7.47606	-13.4498	-12.4208
284.5	779.5	11.1348	4.55456	-5.01107	-7.77776	-11.9046	-9.35065	-11.0857	-5.20929	-14.2255	-10.741	-11.4613	-9.59149	-8.95585	-9.85915	-9.71808	-9.14556	-11.1776	-10.0185	-10.05	-10.581	-13.1152	-10.0867	-11.3511	-10.3622	-9.88716	-8.49381	-12.3902	-10.5131	-7.86222	-7.1749	-12.9986	-12.763	-12.6413	-9.45583	-10.1393	-7.93857	-7.89156	-14.181	-9.4195	-14.341	-10.9621	-13.812	-11.0178	-15.7464	-11.568	-12.1101	-10.2853	-10.6763
285.5	779.5	11.1349	4.55456	-3.38001	-8.99991	-11.7307	-9.56526	-10.3642	-5.18827	-12.9267	-9.83397	-11.4342	-8.63546	-8.0776	-9.3286	-12.2253	-9.51345	-10.34	-10.7931	-10.7398	-10.0924	-9.28605	-10.1585	-11.4078	-7.9191	-9.62668	-8.85449	-10.1815	-8.60918	-8.51362	-8.1525	-11.2609	-11.0635	-10.8926	-7.68168	-11.7532	-7.18439	-5.5148	-10.1104	-8.78581	-13.9861	-8.44382	-13.173	-11.2326	-12.6353	-10.8735	-17.026	-11.8277	-10.6067
286.5	779.5	11.135	4.55456	-2.81841	-11.0025	-10.2271	-9.34918	-10.6196	-7.51247	-12.9567	-8.98272	-9.5824	-8.99287	-6.90306	-9.54372	-13.9243	-10.9633	-7.67127	-9.16087	-10.6485	-10.7895	-7.48313	-12.6652	-10.5939	-7.47765	-9.71357	-8.40071	-7.63762	-8.24895	-10.1936	-9.38041	-9.30506	-7.83601	-7.24954	-5.1293	-13.721	-6.3597	-5.10178	-6.68234	-6.84677	-10.5656	-7.56147	-12.5396	-8.5363	-10.0995	-9.86875	-13.6113	-11.5106	-10.8625
287.5	779.5	11.1351	4.55456	-3.35818	-11.9659	-10.0023	-10.3455	-9.02497	-10.037	-13.5243	-9.46233	-8.47197	-9.05889	-7.75917	-9.13104	-11.8128	-11.8332	-8.12432	-8.46887	-10.4654	-12.9105	-8.37581	-11.2885	-9.73576	-9.6462	-11.8419	-8.58092	-4.55082	-7.78491	-11.4552	-10.1892	-7.10565	-7.06732	-7.2636	-5.37759	-10.1062	-8.12463	-6.52589	-6.25848	-4.32777	-8.55096	-8.30746	-11.176	-6.01768	-8.8132	-9.10955	-9.81238	-11.5823	-11.4317
288.5	779.5	11.1352	4.55456	-5.85429	-10.3214	-12.4834	-12.9748	-6.83636	-11.0217	-13.2195	-11.1896	-10.0497	-8.56206	-12.2172	-8.16519	-9.31017	-11.5028	-10.39	-8.92755	-10.4776	-13.0044	-10.7068	-8.70289	-8.25098	-11.3383	-9.80393	-9.6605	-5.0732	-6.779	-9.86149	-12.0538	-5.96204	-7.9569	-10.8493	-5.67108	-8.5648	-10.5779	-6.56936	-5.94365	-3.66706	-6.10134	-7.79103	-10.4362	-5.57845	-9.15007	-7.30101	-9.34679	-11.3911	-12.777
289.5	779.5	11.1353	4.55456	-10.0566	-11.3715	-13.3399	-13.3167	-4.79035	-9.75856	-11.4205	-14.4084	-11.7397	-8.74174	-14.0122	-7.90834	-8.4296	-11.5435	-11.3141	-10.6571	-11.6697	-11.7985	-12.7342	-8.87276	-8.44424	-12.5629	-7.51459	-10.7606	-7.34989	-6.51567	-8.05186	-14.9789	-6.98948	-9.62311	-10.7505	-6.07409	-8.26707	-12.85	-5.53946	-4.14275	-4.32278	-6.9827	-6.95637	-8.29876	-7.03113	-9.9025	-7.13979	-8.73148	-10.1796	-13.6084
284.5	780.5	11.1348	4.55448	-5.25183	-9.68087	-12.3717	-10.0617	-12.3359	-5.79009	-13.2235	-11.8157	-12.9683	-11.1026	-5.73835	-8.61903	-8.63089	-9.65343	-9.60654	-11.343	-9.94409	-11.2051	-14.0209	-10.3257	-10.7239	-9.38835	-13.2748	-8.28825	-10.5126	-8.99595	-8.71804	-9.10999	-13.0712	-10.7607	-10.9225	-8.69344	-9.51277	-9.11056	-5.22451	-13.6572	-7.85428	-13.6901	-10.4012	-17.2757	-8.89682	-11.1975	-12.4212	-10.8498	-10.8383	-11.7176
285.5	780.5	11.1349	4.55447	-3.05378	-9.34184	-12.3853	-10.5515	-11.1524	-6.41318	-13.2995	-11.3418	-12.2965	-9.76106	-7.04317	-8.90959	-11.9817	-9.00202	-10.763	-12.117	-10.1519	-9.40032	-10.0721	-9.70789	-9.97735	-8.33095	-13.1554	-8.84019	-7.27034	-6.69797	-10.027	-9.00028	-10.0127	-11.1458	-9.10857	-6.06122	-11.1191	-6.90877	-4.35062	-9.15887	-8.21516	-11.7017	-5.74908	-16.7771	-6.88812	-10.8971	-10.2939	-12.9172	-12.4215	-10.7725
286.5	780.5	11.135	4.55447	-1.95933	-10.2624	-9.35918	-11.0313	-10.5142	-7.95668	-14.1491	-10.1352	-10.4336	-8.82075	-7.58011	-9.81661	-14.2064	-9.34064	-7.29432	-11.0289	-9.45968	-9.65414	-8.32074	-10.266	-9.50884	-9.17069	-11.8921	-8.70592	-6.59647	-6.56106	-10.1791	-8.99794	-8.58877	-8.98328	-7.9367	-4.18488	-10.377	-7.56101	-4.85507	-6.63012	-6.14134	-10.5976	-5.69753	-14.5312	-4.70162	-10.3638	-9.01101	-11.3857	-13.9996	-9.6964
287.5	780.5	11.1351	4.55447	-2.085	-9.44456	-7.91816	-12.2143	-9.90323	-9.8089	-15.1601	-10.6174	-9.34613	-8.05525	-8.21968	-9.0783	-14.1225	-9.48654	-7.12009	-10.5139	-9.09441	-12.0977	-9.40926	-11.7795	-9.65277	-11.6915	-11.6514	-10.2801	-5.84471	-5.70209	-10.1364	-9.54413	-7.5967	-8.19974	-9.86919	-4.20779	-8.75802	-9.81224	-6.12759	-5.50391	-3.56351	-10.3685	-7.27701	-12.7691	-4.2874	-9.63682	-10.2708	-9.78587	-12.4258	-9.78674
288.5	780.5	11.1352	4.55447	-5.20979	-8.58448	-9.71776	-11.4603	-8.06997	-10.3757	-15.5117	-11.7177	-12.9403	-9.39416	-10.3635	-7.53277	-8.359	-9.29242	-8.65243	-10.8767	-9.7988	-14.0261	-11.4427	-12.0441	-9.24684	-13.1895	-10.584	-12.3792	-7.38531	-4.98857	-9.4116	-10.0487	-7.15035	-9.00608	-12.3788	-5.40269	-9.66249	-14.1779	-6.58955	-4.71898	-3.10653	-9.76983	-6.46078	-10.2435	-5.5801	-9.76994	-10.0283	-10.0157	-10.4251	-10.5043
289.5	780.5	11.1353	4.55447	-7.77681	-9.89352	-12.672	-11.4486	-5.17265	-8.5782	-11.5268	-14.3906	-13.3399	-10.857	-12.1689	-7.28518	-7.35031	-9.84433	-10.7067	-11.302	-11.1898	-13.2918	-12.2728	-11.8901	-10.1468	-14.1088	-9.0938	-13.6192	-9.30015	-5.38327	-8.43598	-10.5685	-8.50772	-10.4798	-12.2486	-6.68133	-10.6705	-10.7078	-6.06823	-4.74126	-3.52561	-10.038	-7.10482	-6.87952	-7.78223	-9.95357	-9.74019	-9.67319	-9.22005	-13.5278
290.5	780.5	11.1354	4.55447	-5.84986	-12.9881	-14.3126	-13.0147	-3.65603	-6.83614	-9.79649	-16.2458	-12.556	-9.03679	-9.11843	-7.59746	-7.87192	-12.7593	-10.8083	-11.2028	-10.9667	-13.0438	-11.2755	-14.0632	-11.3741	-14.4878	-8.17306	-13.1128	-9.69509	-6.93699	-8.15687	-11.1079	-11.2377	-10.8045	-11.0554	-8.6409	-9.44907	-8.68986	-5.72718	-5.49946	-4.66743	-9.5059	-7.37304	-6.2232	-9.47508	-10.6486	-10.414	-10.1865	-6.64993	-15.2399
284.5	781.5	11.1348	4.55439	-5.6756	-11.1577	-11.2543	-11.5626	-11.1662	-6.45328	-12.3853	-13.817	-10.6768	-10.3671	-5.7067	-6.75004	-7.23128	-9.18648	-7.80946	-11.3937	-9.88573	-10.0114	-13.4389	-10.6426	-10.9103	-8.85356	-13.6768	-9.9185	-9.03693	-9.38678	-10.4319	-15.1943	-13.7831	-9.67051	-9.02303	-8.06162	-12.298	-8.36217	-3.72688	-14.2632	-8.06421	-10.5094	-8.36148	-13.7346	-9.4365	-8.75107	-12.5463	-9.85469	-8.61957	-13.5794
285.5	781.5	11.1349	4.55438	-4.00682	-10.0081	-10.5471	-10.9847	-9.68182	-7.10395	-14.0715	-11.6322	-12.0319	-10.4417	-7.07034	-8.37683	-7.87296	-8.14429	-8.49961	-12.2124	-8.68613	-9.0135	-12.1496	-10.2829	-9.72259	-9.22836	-15.7237	-10.8839	-6.35194	-7.15798	-11.9427	-11.4581	-10.0239	-11.1055	-8.28427	-6.24149	-10.6768	-8.58106	-4.15036	-9.41103	-7.09499	-9.2234	-4.90517	-12.6186	-6.36383	-8.74868	-10.9987	-10.4433	-8.54459	-10.4925
286.5	781.5	11.135	4.55438	-2.44901	-9.57593	-8.57029	-10.2545	-9.38716	-8.21821	-13.9061	-10.4501	-10.7466	-9.52937	-7.84691	-10.6799	-8.8079	-7.81138	-7.12943	-11.6983	-8.31795	-8.79415	-9.53442	-10.6358	-9.67248	-10.84	-13.2758	-11.0263	-6.47906	-6.66045	-10.5868	-10.437	-8.20068	-10.0841	-8.93863	-5.62504	-7.79566	-9.14379	-4.9428	-6.78068	-4.93629	-10.2142	-5.33834	-12.1994	-3.71507	-9.41786	-9.43415	-8.8288	-10.3831	-9.20584
287.5	781.5	11.1351	4.55438	-2.25475	-8.28832	-7.75898	-11.6438	-9.44481	-9.7607	-12.3247	-10.9021	-9.70525	-8.42543	-7.949	-9.86104	-11.3415	-7.93778	-7.21255	-11.4427	-9.01673	-10.0784	-9.96939	-12.157	-10.4864	-13.3746	-11.057	-12.7078	-7.32497	-5.93267	-9.24698	-11.0775	-7.81645	-9.15241	-11.6148	-5.3841	-7.49119	-10.2071	-5.95528	-4.46542	-3.90381	-11.9929	-7.32929	-10.9691	-4.254	-9.95002	-11.2698	-8.50373	-10.2222	-10.0439
288.5	781.5	11.1352	4.55438	-5.98317	-8.80442	-9.75494	-8.96571	-8.86747	-10.3708	-13.2127	-11.057	-13.1348	-11.3474	-8.17472	-7.70019	-8.54734	-7.63642	-8.57575	-11.6998	-9.96987	-11.9544	-12.1511	-13.9295	-11.2685	-16.0692	-10.532	-14.2595	-8.61609	-5.85433	-8.33792	-11.1168	-8.32363	-8.80607	-12.2121	-6.13055	-9.47109	-9.26671	-6.78448	-3.97369	-4.05308	-12.6531	-6.72945	-8.02727	-7.25933	-10.887	-12.8147	-9.44965	-9.91703	-8.43696
289.5	781.5	11.1353	4.55438	-8.38809	-9.48051	-12.5086	-9.17981	-6.56117	-8.59251	-11.295	-12.5689	-12.2968	-12.0581	-9.55026	-7.95965	-7.94912	-8.11429	-9.90404	-10.8007	-11.9724	-12.7488	-11.7977	-12.2683	-12.349	-16.2641	-10.2038	-14.8961	-9.12583	-6.94929	-8.51883	-10.021	-9.49269	-9.58169	-10.8224	-7.43512	-11.1551	-7.83908	-6.89456	-5.47008	-4.64115	-12.3929	-7.15244	-6.16552	-11.5339	-11.3029	-11.5348	-9.68059	-10.0049	-11.5996
290.5	781.5	11.1354	4.55438	-6.52685	-9.76419	-14.1906	-13.0357	-5.08982	-7.51838	-10.616	-14.0566	-12.4869	-10.0893	-8.5785	-8.56253	-8.90099	-10.5946	-10.2831	-9.38185	-11.8446	-13.1344	-9.59899	-9.87467	-12.9386	-13.6571	-9.15156	-13.4447	-9.01026	-8.78328	-9.74232	-9.94514	-10.6174	-9.66719	-9.71861	-8.45727	-10.1026	-9.38466	-7.25817	-7.88892	-5.81242	-10.3436	-7.82336	-6.28144	-13.4862	-10.8695	-10.6996	-9.68329	-8.06879	-12.4324
285.5	782.5	11.1349	4.5543	-4.50875	-10.813	-10.1221	-10.222	-9.9225	-7.43194	-12.7439	-11.862	-8.27568	-11.6672	-8.07694	-8.59733	-5.42964	-7.68842	-7.23693	-10.4345	-7.41937	-8.1982	-10.4388	-9.04868	-11.4729	-10.0001	-13.8204	-10.6008	-8.15002	-8.57267	-12.8441	-11.719	-11.615	-8.28233	-8.44523	-7.22827	-8.76213	-8.68914	-4.82392	-10.1203	-4.93582	-7.14132	-5.32033	-9.54759	-7.95699	-8.59931	-10.8431	-8.10645	-6.27805	-9.12273
286.5	782.5	11.135	4.55429	-3.01575	-9.38645	-9.5483	-10.5174	-9.64132	-8.44931	-11.0623	-10.382	-8.03005	-10.5856	-8.67314	-10.8966	-8.03449	-7.64054	-7.2346	-10.0723	-6.89577	-7.68511	-9.22589	-9.78865	-10.5429	-11.0792	-12.2653	-9.74486	-8.53503	-8.7259	-10.8719	-11.0569	-9.2971	-6.20372	-9.28793	-7.80957	-6.91928	-8.9643	-5.84778	-7.19274	-3.1536	-9.79588	-6.50852	-9.92979	-6.30653	-8.33391	-10.9744	-6.95594	-6.64404	-9.16144
287.5	782.5	11.1351	4.55429	-3.61696	-8.51952	-9.82848	-10.7997	-8.39171	-11.448	-9.10645	-10.3766	-8.31307	-9.32423	-7.85953	-10.5977	-11.7305	-7.52021	-8.45149	-10.4987	-7.78491	-8.57379	-9.64039	-11.9568	-11.057	-12.1433	-10.4257	-9.779	-9.66606	-8.15144	-8.1916	-10.9079	-8.36732	-5.70342	-10.2301	-8.09026	-7.15183	-9.39298	-7.41817	-5.04625	-3.7103	-10.8997	-8.65842	-9.54084	-7.02491	-8.97062	-11.6609	-7.03753	-7.54783	-11.1323
288.5	782.5	11.1352	4.55429	-7.42408	-9.95603	-11.1769	-9.01944	-8.53873	-9.94747	-10.3791	-10.2186	-9.59234	-10.7442	-6.95422	-9.07111	-10.064	-6.44894	-9.81669	-11.4006	-9.20422	-10.0669	-11.3945	-12.6143	-11.849	-14.0112	-10.0672	-11.4304	-10.5334	-8.4007	-6.75482	-11.2225	-8.82765	-7.03071	-10.1263	-8.3699	-8.80782	-9.32026	-8.22005	-4.61186	-5.58051	-10.6022	-8.27336	-7.74116	-10.3291	-10.4157	-12.0002	-8.70241	-9.14324	-8.99409
289.5	782.5	11.1353	4.55429	-9.32278	-10.0484	-12.1906	-9.51288	-7.71638	-8.24465	-12.3503	-11.1644	-10.5761	-10.9748	-7.96376	-9.97157	-9.63822	-7.2756	-10.0176	-10.2373	-12.3451	-11.5483	-10.9103	-10.7253	-11.2727	-16.0937	-9.65	-14.2252	-9.85629	-10.0713	-7.95727	-11.17	-9.50024	-9.08321	-9.61599	-8.69744	-10.1776	-11.0405	-7.74598	-6.03525	-7.32479	-11.4495	-8.03075	-7.08206	-12.1358	-12.1239	-10.8705	-9.67205	-10.1704	-11.4681
290.5	782.5	11.1354	4.55429	-8.06745	-9.06163	-13.1167	-12.261	-6.81047	-8.56359	-12.1506	-12.1019	-10.8849	-10.0291	-8.12403	-10.0494	-9.92212	-9.96109	-10.3726	-9.89845	-14.3927	-13.9437	-9.886	-9.38305	-9.26656	-12.3768	-9.4047	-12.2392	-9.36128	-10.9433	-9.72528	-11.5817	-9.83772	-9.48967	-9.44905	-8.97924	-10.8989	-13.0918	-8.16647	-7.27027	-8.83684	-10.9362	-8.45644	-7.756	-12.1379	-12.0895	-11.0454	-9.96267	-10.1445	-10.5057
285.5	783.5	11.1349	4.55421	-4.91776	-10.9163	-12.3791	-10.7253	-9.56387	-8.32083	-10.0963	-12.5392	-7.3777	-12.8183	-7.24997	-7.762	-5.60048	-7.84438	-8.16401	-9.1859	-7.15982	-6.8569	-10.1548	-8.06602	-14.2436	-10.5266	-10.6882	-8.65027	-10.3997	-9.30888	-13.2749	-10.717	-11.6783	-7.03341	-9.66135	-7.39212	-7.97215	-7.31449	-6.64138	-8.66653	-4.64051	-6.82135	-7.16445	-7.38205	-8.49333	-9.48248	-10.9518	-8.55274	-6.2228	-9.57654
286.5	783.5	11.135	4.5542	-3.88952	-9.0542	-14.0173	-11.2641	-8.45934	-9.93607	-9.96061	-11.4494	-7.32089	-11.5792	-8.65499	-9.51254	-8.2016	-8.74117	-7.43434	-8.70451	-5.81529	-6.63328	-9.49951	-8.90354	-13.4944	-10.3306	-10.6515	-8.04676	-9.53307	-9.99226	-12.1066	-9.88768	-12.0708	-4.09718	-9.74496	-9.13259	-7.39289	-8.75609	-7.64058	-8.91525	-3.23632	-9.06895	-9.3901	-8.57606	-8.75099	-8.24948	-13.4601	-7.27448	-6.47628	-9.86211
287.5	783.5	11.1351	4.5542	-5.10424	-9.34456	-13.39	-11.2506	-8.24581	-13.1958	-8.86169	-11.0231	-7.76769	-9.37786	-7.98825	-10.8475	-12.1582	-7.9182	-8.27602	-9.43584	-6.30313	-8.09892	-9.65777	-11.9571	-12.6674	-9.84349	-8.85899	-8.1481	-8.86135	-8.87878	-7.98201	-8.8908	-10.2677	-3.87482	-9.9421	-11.4174	-6.71748	-9.43351	-8.79979	-7.70451	-3.75685	-8.7076	-10.6314	-9.32666	-10.7759	-8.82715	-12.8113	-7.10883	-7.70278	-11.0399
473.5	486.5	11.152	4.58061	-9.34347	-10.7242	-11.9664	-10.3299	-8.95221	-9.81004	-11.6197	-8.90794	-10.2967	-13.4396	-8.41768	-10.5614	-8.7047	-10.7368	-11.1109	-8.2419	-13.1792	-11.2186	-9.78264	-13.9856	-9.45531	-6.70636	-10.8211	-8.69056	-9.17197	-6.80091	-8.67363	-11.4528	-11.0332	-7.93781	-10.1047	-10.0934	-5.03953	-13.4554	-7.51286	-3.11994	-8.03047	-8.80566	-8.29917	-6.86128	-8.28246	-10.2979	-12.0986	-12.0609	-9.10895	-10.3415
470.5	487.5	11.1517	4.58052	-7.86341	-9.80771	-10.2004	-13.823	-10.9926	-10.1063	-9.79896	-10.6404	-7.84343	-11.3975	-10.5949	-8.79925	-8.98879	-8.18998	-10.3503	-11.8617	-11.9267	-10.7609	-9.60341	-11.885	-8.59071	-9.03523	-10.7413	-9.77497	-8.2926	-7.70175	-8.53815	-13.0342	-10.57	-5.23297	-10.765	-6.79444	-7.13462	-9.21847	-7.25884	-7.21984	-6.45682	-8.23839	-10.1608	-10.6401	-6.95938	-14.8595	-10.5992	-8.67187	-9.857	-13.3776
471.5	487.5	11.1518	4.58052	-8.13359	-9.32516	-11.2869	-15.4166	-11.2739	-8.92397	-10.5562	-11.71	-8.71387	-11.9911	-11.4982	-8.40875	-8.9169	-8.91964	-10.2533	-9.8635	-11.2972	-11.9332	-9.67014	-13.2412	-7.952	-7.94716	-10.1254	-9.98081	-8.3958	-9.53443	-6.84971	-12.2697	-12.1354	-6.23303	-11.5621	-6.5621	-5.23825	-9.4996	-7.54321	-5.69694	-7.18617	-8.34719	-10.226	-14.3748	-7.85097	-14.0524	-10.2199	-8.78727	-11.0179	-10.8271
472.5	487.5	11.1519	4.58052	-9.11279	-9.12939	-12.5902	-12.1937	-9.68862	-9.75441	-11.6504	-12.704	-9.09229	-11.6874	-11.6616	-9.35333	-8.93456	-8.40193	-9.33542	-8.51599	-12.6872	-12.3858	-10.2299	-13.5814	-7.05344	-7.85698	-12.2718	-11.5059	-8.40203	-10.7068	-6.69216	-10.1129	-11.58	-7.90775	-9.84155	-6.95604	-4.71985	-10.1329	-8.26215	-2.76182	-8.42646	-9.29002	-9.42616	-9.55558	-8.71388	-13.1263	-8.70895	-11.313	-10.9368	-10.2919
473.5	487.5	11.152	4.58052	-8.93045	-10.03	-13.1715	-9.64433	-9.13285	-11.1608	-11.4954	-11.6408	-9.1696	-11.4355	-9.71373	-9.86015	-8.7232	-7.81014	-10.3606	-8.62952	-11.5661	-10.7772	-11.2056	-12.5053	-8.20066	-7.38802	-12.3939	-10.4633	-9.27013	-9.37139	-7.95872	-10.2358	-10.1366	-8.19047	-8.44395	-7.64129	-5.09297	-10.8144	-9.12415	-2.31173	-10.3924	-8.45134	-6.99936	-5.63	-7.90726	-12.8992	-9.84839	-12.8034	-9.45852	-9.76311
468.5	488.5	11.1515	4.58044	-4.41735	-11.6608	-11.1008	-9.05506	-8.18275	-9.48336	-7.2321	-10.1934	-7.71634	-10.081	-6.86337	-9.01259	-8.15107	-8.00835	-9.71824	-10.4757	-14.6001	-12.5089	-9.65338	-14.11	-10.9669	-16.5868	-11.6745	-10.6931	-11.7471	-12.0926	-9.45694	-11.6141	-7.17904	-10.5974	-7.48447	-10.018	-13.0527	-8.17023	-9.35209	-6.76614	-12.2891	-7.48295	-10.4724	-11.0883	-11.8171	-9.05484	-12.9709	-10.2663	-12.0482	-12.2946
469.5	488.5	11.1516	4.58043	-4.06955	-12.6156	-9.44241	-10.3654	-8.40061	-11.8009	-8.04526	-9.9624	-7.56569	-10.2735	-8.97601	-10.2729	-8.95892	-8.6997	-10.2304	-11.2578	-13.2387	-11.7019	-9.88775	-15.242	-9.53993	-13.7272	-12.2002	-9.99008	-10.606	-11.1673	-14.1225	-9.93137	-7.64408	-9.84825	-8.53797	-6.31641	-10.4211	-7.05005	-7.81561	-6.32174	-9.98274	-7.26017	-12.7997	-9.41269	-8.38361	-9.20369	-11.1414	-11.2627	-9.7446	-12.1275
470.5	488.5	11.1517	4.58043	-4.85159	-11.2791	-9.17546	-12.8344	-8.92871	-10.1058	-9.00328	-11.5512	-7.59821	-11.6146	-12.8033	-9.84455	-8.66501	-8.41489	-12.7882	-10.1228	-11.2178	-11.7383	-11.0364	-14.2706	-9.16688	-11.2136	-11.196	-10.3778	-8.81677	-9.97504	-12.4049	-9.08273	-10.2994	-8.03955	-10.9891	-5.99627	-6.84479	-6.77866	-7.71744	-6.43536	-7.96521	-8.31906	-11.8553	-9.5924	-7.70071	-13.2065	-12.0093	-9.65372	-11.0667	-10.817
471.5	488.5	11.1518	4.58043	-5.77973	-8.85743	-9.48719	-13.6599	-10.6399	-9.51363	-10.4977	-13.9969	-7.53429	-10.8709	-13.6404	-8.88668	-10.0444	-8.26056	-11.1104	-8.81607	-9.68227	-12.4657	-11.2772	-12.0266	-10.1232	-9.42574	-10.5478	-11.6266	-8.81174	-10.095	-9.23231	-10.6548	-11.5645	-7.88268	-13.758	-3.84314	-4.13354	-7.47253	-6.78006	-6.57807	-8.22661	-7.22179	-12.8754	-12.591	-9.08104	-16.3778	-13.0487	-8.93145	-12.8736	-9.40688
472.5	488.5	11.1519	4.58043	-7.45124	-7.54094	-11.092	-11.3256	-10.7498	-10.3736	-12.1032	-15.9379	-8.27675	-9.56356	-12.9046	-9.52644	-9.9558	-8.19787	-10.164	-8.6462	-11.4496	-13.0387	-10.2995	-9.81852	-8.79306	-8.94084	-10.4041	-13.5036	-9.41049	-13.1324	-7.67077	-9.99026	-10.4586	-8.37049	-8.5561	-2.54822	-3.50864	-7.91811	-6.35393	-3.99114	-9.48669	-9.17756	-11.4906	-10.5045	-9.78292	-15.6745	-10.0105	-10.6738	-13.6982	-10.1766
473.5	488.5	11.152	4.58043	-8.69961	-7.59154	-13.0721	-9.13593	-9.59471	-10.6069	-11.8068	-12.7757	-9.67128	-9.85162	-11.2497	-10.569	-9.53041	-7.8915	-11.5999	-10.7005	-10.2738	-10.7895	-10.1994	-10.2704	-8.97693	-9.62455	-9.54042	-12.7649	-10.6957	-11.1669	-7.76556	-9.70051	-9.82777	-8.80057	-6.67645	-7.50286	-4.93673	-9.45272	-7.09163	-3.22047	-10.2614	-8.36074	-7.27979	-5.81335	-8.27587	-16.4961	-9.13471	-12.4635	-12.3749	-10.6167
474.5	488.5	11.1521	4.58043	-10.5087	-8.08811	-13.3987	-8.45867	-9.74793	-9.18626	-10.5465	-8.77623	-12.9449	-10.8242	-11.4778	-10.2755	-7.55558	-8.97756	-12.5719	-14.1259	-7.72562	-11.3044	-10.912	-9.75691	-10.3628	-8.6761	-8.96744	-11.0863	-11.767	-10.2505	-9.37129	-12.4395	-9.50365	-8.02963	-8.61205	-6.46852	-5.36287	-9.80277	-8.09326	-4.66706	-9.37172	-7.43232	-6.27708	-4.03562	-6.84717	-14.3019	-9.02861	-12.9129	-12.8053	-10.892
469.5	489.5	11.1516	4.58035	-4.34194	-12.3591	-10.1953	-8.67871	-7.92073	-10.6615	-8.81987	-9.32179	-6.98982	-9.11294	-11.2805	-10.7179	-6.7238	-8.77502	-11.8664	-11.0707	-15.5087	-10.916	-11.7056	-14.067	-10.3857	-15.2787	-11.5808	-9.41226	-11.332	-12.2934	-13.1797	-9.82945	-8.32005	-10.4042	-8.07307	-6.88522	-8.6931	-6.65278	-10.2594	-7.85659	-9.99361	-7.63957	-10.5436	-9.62382	-10.4944	-11.2292	-11.4354	-15.115	-8.82091	-9.20925
470.5	489.5	11.1517	4.58034	-5.10018	-11.4781	-10.6195	-9.95433	-9.71967	-9.90624	-8.6954	-12.0339	-7.14308	-10.6155	-15.4356	-9.46039	-7.15252	-8.18687	-14.9407	-10.3981	-13.1904	-11.9891	-12.6846	-13.0793	-10.3558	-17.4627	-11.3183	-9.41389	-9.28697	-12.0854	-12.6641	-8.85492	-10.3215	-9.87172	-10.7872	-6.39213	-5.58749	-6.55462	-9.30318	-7.6107	-9.00226	-7.41476	-10.9884	-9.60674	-9.06527	-14.3424	-13.802	-13.557	-10.9116	-10.4906
471.5	489.5	11.1518	4.58034	-5.34472	-7.60057	-9.34507	-9.49315	-11.6133	-10.8347	-10.0428	-15.3438	-6.79623	-10.3138	-16.1638	-8.61213	-11.0102	-7.97471	-11.8712	-9.24666	-9.7754	-12.0876	-10.4489	-9.39402	-11.1333	-13.1428	-11.0947	-10.5896	-10.5427	-11.3227	-10.8348	-10.3068	-9.86248	-9.32627	-13.3615	-3.96546	-2.96989	-6.59397	-8.36477	-7.27864	-9.52337	-6.4639	-13.0717	-11.7457	-9.74803	-16.5765	-15.6067	-12.3789	-13.7617	-10.3224
472.5	489.5	11.1519	4.58034	-6.39048	-6.77583	-10.2157	-8.90513	-10.4773	-12.2605	-11.6995	-13.1346	-8.91926	-9.19299	-12.5529	-9.30381	-11.253	-7.84425	-12.257	-10.1278	-10.4133	-11.6769	-9.70457	-8.25591	-11.8729	-10.6875	-9.30951	-12.6097	-10.3967	-13.3005	-8.39335	-11.633	-9.61589	-9.03946	-8.48374	-2.77697	-2.69454	-7.39781	-6.30014	-5.7023	-8.43549	-8.76019	-12.8197	-11.9108	-10.2632	-14.0308	-11.4697	-12.2728	-14.2885	-11.2598
473.5	489.5	11.152	4.58034	-9.15716	-6.48467	-10.9727	-8.14724	-9.51723	-9.09225	-11.1977	-10.0826	-11.3244	-10.5311	-11.0496	-10.6294	-9.67681	-6.3833	-13.7196	-12.5977	-10.315	-10.0385	-9.93299	-9.69732	-11.096	-11.2343	-7.46955	-12.4016	-9.32118	-11.5208	-6.89076	-10.9429	-9.69362	-11.3683	-7.41762	-8.92461	-4.75089	-9.8734	-5.20837	-5.75837	-7.76223	-7.715	-8.99519	-8.08198	-10.2699	-14.4289	-9.27707	-12.9221	-15.2115	-11.9458
474.5	489.5	11.1521	4.58034	-11.5007	-6.74301	-10.3595	-7.92623	-10.0275	-7.43369	-9.0815	-8.4434	-15.869	-11.5124	-11.225	-11.6659	-8.7141	-6.83454	-12.314	-12.0777	-8.34199	-10.1074	-10.2272	-10.4948	-9.91287	-10.8215	-9.19842	-12.8266	-11.1778	-11.5893	-6.51033	-12.4517	-9.71735	-11.3206	-9.82362	-10.3799	-6.20452	-12.0003	-7.1806	-6.97769	-8.73649	-7.71719	-9.06711	-6.41062	-8.42288	-13.2558	-9.44177	-14.764	-12.2043	-11.5076
469.5	490.5	11.1516	4.58026	-6.4954	-11.0815	-12.53	-7.521	-8.04723	-9.58475	-9.16535	-9.02306	-8.3099	-7.73321	-11.3283	-12.6667	-6.92262	-10.1648	-12.5797	-10.9332	-13.1681	-9.20785	-11.2486	-13.7091	-11.6393	-14.5558	-11.2606	-10.65	-12.3573	-12.4712	-10.746	-11.0485	-9.69357	-11.6229	-8.63664	-7.23317	-9.04776	-8.20404	-9.13651	-9.67468	-8.78132	-7.87042	-11.678	-11.5668	-12.1594	-14.9012	-12.5174	-13.9955	-8.27267	-7.92414
470.5	490.5	11.1517	4.58025	-7.76908	-11.0613	-12.1448	-8.45867	-11.8848	-10.5581	-8.56558	-10.0422	-7.93149	-9.96875	-12.3674	-8.82379	-7.36625	-8.90471	-12.4821	-11.6933	-14.2909	-12.0355	-12.5843	-11.558	-12.5419	-20.2629	-11.2328	-9.42185	-11.1314	-11.846	-10.3328	-11.8011	-11.7106	-10.0401	-11.1522	-8.4504	-6.67994	-8.72689	-9.1028	-9.71166	-8.00547	-9.63903	-11.6453	-10.93	-11.1713	-18.7268	-14.9706	-13.6279	-8.61141	-9.1286
471.5	490.5	11.1518	4.58025	-6.99886	-8.88141	-9.38118	-8.14362	-13.6786	-11.0815	-9.42771	-11.5347	-7.81857	-9.59189	-11.0202	-7.24771	-9.47282	-7.76985	-10.9115	-11.2067	-11.9682	-11.8609	-11.6347	-7.37571	-12.7642	-16.3176	-12.3318	-10.0221	-11.8668	-11.2686	-10.1973	-13.551	-10.7012	-10.2879	-13.0958	-6.83872	-4.27885	-8.19291	-10.7725	-8.76373	-10.1032	-8.59453	-10.7891	-11.1718	-10.6416	-16.2583	-15.4408	-13.4216	-11.2866	-11.0833
472.5	490.5	11.1519	4.58025	-7.29578	-8.16951	-9.4836	-8.40945	-11.6265	-9.72796	-9.7588	-10.7324	-10.8847	-10.1561	-9.21819	-7.21433	-9.53398	-6.93845	-12.9951	-11.3364	-11.26	-10.5969	-11.7248	-8.02929	-12.4204	-11.6359	-9.66006	-11.3288	-9.74681	-12.6034	-8.70107	-14.3862	-10.5003	-10.7887	-11.0075	-6.64608	-3.83606	-8.16097	-7.65824	-7.74122	-8.39132	-9.45921	-10.2865	-13.537	-10.9981	-12.663	-12.1216	-13.1643	-12.4878	-11.3732
473.5	490.5	11.152	4.58025	-9.90877	-7.26239	-9.66655	-8.40302	-10.565	-7.55106	-10.1554	-9.3747	-12.9147	-10.6513	-8.76119	-7.59591	-8.18772	-4.95195	-15.0323	-13.2179	-11.948	-9.24585	-11.5784	-11.9962	-11.253	-10.1882	-7.07994	-12.1043	-8.45843	-12.4208	-6.76388	-12.1856	-9.46195	-11.3096	-10.5893	-11.8916	-5.75198	-10.9571	-5.37336	-9.09228	-6.15131	-7.78295	-10.8192	-11.9407	-11.5769	-11.2958	-10.2865	-13.7125	-12.3545	-11.3666
474.5	490.5	11.1521	4.58025	-10.3	-6.9329	-8.44594	-8.38147	-10.0776	-6.52865	-8.91296	-8.27085	-13.5274	-9.55335	-9.60693	-8.06194	-7.4874	-5.09176	-13.6109	-11.468	-11.5665	-9.22054	-10.9976	-13.2089	-9.00327	-12.7064	-7.84587	-13.899	-10.5903	-14.0251	-5.70647	-10.9479	-8.30472	-12.2131	-12.4551	-17.0325	-7.82783	-11.3908	-8.14492	-10.0113	-7.59371	-7.91308	-10.2881	-10.5989	-11.0187	-10.721	-11.5297	-12.954	-11.0947	-9.75575
475.5	490.5	11.1522	4.58025	-8.10767	-7.43551	-7.45105	-8.60376	-7.87855	-7.4045	-8.53711	-7.29194	-11.5653	-9.53884	-10.1133	-9.69779	-6.88687	-7.05193	-11.6969	-10.5883	-10.0357	-8.98486	-9.04262	-11.7472	-7.99872	-12.0486	-9.05208	-12.965	-12.8334	-15.3703	-5.89743	-12.0454	-9.80004	-11.1345	-11.5872	-14.4462	-10.1835	-10.9262	-12.4461	-8.82801	-8.68325	-10.5092	-11.648	-11.7544	-8.73349	-8.88954	-11.2656	-10.5894	-13.8149	-8.90649
470.5	491.5	11.1517	4.58017	-9.47902	-9.53941	-12.2088	-7.89934	-12.4594	-10.1189	-9.89482	-8.67123	-9.18783	-9.35033	-8.89326	-9.38213	-8.73856	-9.44509	-13.7551	-10.8136	-13.8516	-11.4894	-14.1534	-11.0946	-13.3477	-14.0819	-11.7071	-10.0209	-13.8632	-10.6333	-8.91221	-15.0507	-13.5872	-10.1495	-11.8179	-8.91658	-9.98091	-11.312	-7.72143	-11.6372	-7.05115	-11.2336	-11.9798	-12.0227	-11.6377	-13.4763	-14.1341	-12.502	-7.39777	-10.0307
471.5	491.5	11.1518	4.58016	-8.99425	-8.67032	-10.0999	-8.82336	-14.1113	-10.3474	-8.92956	-9.18193	-9.92064	-10.0958	-8.23162	-6.54506	-8.31727	-7.47414	-11.8709	-11.5153	-12.9457	-12.5951	-15.165	-7.72769	-11.5019	-13.2526	-12.7222	-10.365	-13.377	-11.549	-10.5277	-17.4852	-11.7907	-10.2955	-11.6835	-10.5013	-8.381	-9.57285	-12.0001	-11.6587	-8.39105	-8.2695	-9.92672	-11.4345	-12.2658	-13.2489	-13.3809	-11.4791	-9.52618	-10.6764
472.5	491.5	11.1519	4.58016	-8.40505	-8.83009	-9.43098	-9.75905	-13.6294	-8.78408	-7.91021	-9.59606	-11.3572	-9.53683	-6.90846	-5.71165	-6.66704	-7.68094	-12.5524	-12.2566	-13.2751	-10.8382	-16.283	-8.39005	-12.0115	-12.2083	-10.1704	-10.151	-10.6205	-12.9152	-10.06	-15.0459	-11.3241	-10.9928	-12.6796	-12.4748	-7.4478	-9.65711	-9.87012	-10.2837	-9.5704	-8.72702	-8.05362	-11.6205	-12.3236	-11.6505	-13.3504	-11.5886	-12.2331	-10.6864
473.5	491.5	11.152	4.58016	-9.07029	-8.51713	-8.76004	-9.33451	-12.1627	-7.06876	-8.46783	-9.59182	-11.5923	-8.53331	-7.18583	-5.7636	-5.11197	-8.43901	-13.2856	-14.257	-14.3681	-10.0219	-15.2028	-12.0884	-12.7775	-8.88444	-6.78674	-10.7616	-9.59305	-13.009	-8.45635	-13.1738	-9.95814	-9.49725	-12.7871	-15.171	-8.42916	-11.0038	-7.43028	-11.46	-6.43238	-8.16923	-9.50009	-11.3096	-11.6069	-10.3288	-14.489	-12.6931	-12.2167	-10.8884
474.5	491.5	11.1521	4.58016	-8.44952	-7.79122	-7.70082	-9.29368	-10.2786	-6.28999	-9.43843	-8.58382	-11.43	-7.97055	-8.97883	-5.88842	-5.26945	-8.65	-13.3605	-12.4583	-12.8696	-10.8185	-13.0868	-14.5452	-9.70016	-10.1332	-6.55159	-14.5639	-10.7136	-13.6209	-7.71388	-11.7188	-7.93919	-9.78198	-11.8096	-14.5745	-9.1853	-10.3006	-9.45698	-9.84806	-6.29339	-8.48154	-10.5798	-11.5995	-11.2135	-11.2979	-15.6733	-12.9038	-11.7832	-9.95678
470.5	492.5	11.1517	4.58008	-8.49538	-9.52867	-10.1034	-8.81813	-12.7647	-8.94423	-10.1436	-8.57706	-9.10995	-8.87813	-6.48342	-8.53657	-8.5061	-8.83046	-15.9709	-11.6588	-12.5933	-10.7541	-16.8319	-11.7185	-12.5578	-10.1833	-12.0367	-11.3116	-12.1419	-7.63967	-7.06376	-13.6295	-11.3791	-10.3576	-10.6112	-7.32258	-10.9628	-13.3069	-7.65389	-9.89033	-7.81266	-9.40986	-10.3093	-10.8584	-8.38448	-11.3624	-13.7795	-11.008	-7.54117	-10.7304
471.5	492.5	11.1518	4.58007	-8.6813	-9.42869	-9.17317	-10.1155	-15.0353	-8.30533	-7.78745	-8.76778	-9.96878	-9.035	-7.0602	-6.70509	-8.13677	-7.41852	-15.4059	-11.9768	-11.3641	-13.1096	-17.1925	-9.87766	-10.0991	-11.3078	-12.0801	-11.371	-14.4217	-10.2616	-10.2495	-15.3732	-11.3637	-10.0711	-9.4267	-9.51533	-11.8957	-13.0973	-10.7016	-10.5936	-8.17862	-7.60185	-10.715	-10.5028	-11.4232	-11.9548	-12.718	-10.7672	-9.04126	-10.8222
472.5	492.5	11.1519	4.58007	-7.99816	-9.73348	-9.23866	-9.94704	-12.3298	-7.84208	-6.76723	-9.63535	-9.73246	-8.42491	-6.10981	-5.78093	-6.36164	-8.88194	-13.0727	-13.7231	-13.2802	-12.2041	-16.2966	-10.6722	-10.9367	-14.0599	-10.5435	-10.2698	-13.0801	-13.5244	-10.9314	-14.6021	-10.6288	-10.6815	-11.4614	-14.8872	-11.7349	-11.9987	-10.5408	-10.6473	-10.2538	-7.97342	-7.55062	-9.79913	-13.8762	-11.7338	-13.1049	-11.6086	-11.4243	-10.9495
357.5	605.5	11.1415	4.57007	-8.38065	-6.72426	-7.95313	-7.92676	-13.2258	-11.4108	-8.39462	-7.25673	-7.9387	-9.57311	-5.47701	-9.28406	-7.1239	-8.22184	-14.1862	-13.3965	-10.6818	-10.2553	-13.6065	-12.7618	-12.0425	-13.4655	-13.2172	-12.7053	-12.623	-13.3201	-9.20794	-16.3326	-9.85792	-11.7436	-10.4621	-10.518	-8.84151	-10.2137	-13.7245	-9.83215	-11.1732	-10.0079	-9.96566	-10.5128	-10.3122	-8.93263	-12.2273	-13.2905	-13.0408	-14.0721
358.5	605.5	11.1416	4.57007	-9.66219	-9.2533	-8.86649	-7.3996	-10.8736	-10.931	-6.78716	-7.88231	-7.58995	-10.8577	-8.07971	-8.98209	-8.04341	-8.44776	-13.4888	-13.8773	-11.4545	-12.3162	-15.0214	-11.2545	-12.2726	-11.6186	-13.9504	-10.3522	-14.4318	-10.733	-10.791	-14.2729	-12.7796	-12.8982	-13.5519	-11.6387	-11.4502	-13.0129	-12.8078	-9.60472	-11.673	-11.9899	-13.2213	-11.8392	-11.2315	-10.6115	-13.7888	-10.1781	-13.7461	-14.36
359.5	605.5	11.1417	4.57007	-7.96815	-11.4859	-8.26799	-7.38223	-8.45708	-10.8046	-5.62615	-9.81485	-7.13729	-8.47416	-9.53859	-8.37394	-9.16771	-9.1598	-16.1001	-14.229	-13.0067	-11.884	-13.402	-11.1427	-13.4283	-11.9517	-15.428	-10.5078	-12.8586	-10.4941	-11.8031	-12.4493	-16.0196	-13.1232	-15.7188	-12.6099	-9.41147	-12.166	-11.647	-10.7057	-12.0409	-12.627	-12.4449	-10.2497	-10.4545	-8.46239	-10.3698	-8.30918	-17.3957	-14.2049
357.5	606.5	11.1415	4.56998	-8.06369	-8.23381	-8.6353	-8.85825	-10.8017	-11.0465	-8.30603	-7.61704	-6.95286	-7.34755	-6.62637	-7.83995	-6.23049	-9.73728	-17.2512	-11.724	-10.7027	-10.8031	-15.4617	-12.6347	-11.905	-12.1564	-11.6238	-11.9711	-14.1806	-11.0947	-9.69784	-12.6772	-11.463	-11.0977	-12.7952	-13.2666	-8.36791	-11.3113	-12.5501	-11.0977	-11.6912	-8.31508	-10.8904	-10.246	-12.0055	-10.209	-10.2516	-13.9664	-12.4877	-12.841
358.5	606.5	11.1416	4.56998	-8.37266	-9.73951	-10.6872	-7.85103	-10.7951	-9.60642	-7.61347	-7.61592	-7.37312	-9.7437	-9.44707	-9.01144	-6.77185	-8.56416	-14.0018	-12.6915	-11.097	-12.6453	-14.482	-11.9223	-11.6264	-12.9162	-13.4324	-9.83103	-14.9805	-8.81428	-11.8374	-15.1091	-12.7609	-13.234	-13.0498	-12.3709	-10.2899	-15.0127	-11.8439	-10.3219	-12.2458	-11.3949	-11.8391	-11.6003	-12.3428	-10.1727	-12.5108	-12.5579	-12.2666	-14.3898
359.5	606.5	11.1417	4.56998	-8.65218	-11.4842	-10.4378	-8.14012	-9.26641	-8.77993	-7.58469	-8.53967	-8.40731	-10.1031	-7.31961	-9.38845	-9.12816	-7.67639	-12.9457	-15.3513	-11.9227	-14.5478	-13.06	-12.416	-13.9175	-12.2802	-15.5794	-10.9189	-12.2392	-9.10617	-12.4978	-14.521	-15.6188	-12.4503	-15.0883	-11.9639	-10.0498	-10.1385	-11.654	-9.77927	-13.206	-14.0594	-10.3142	-9.44534	-11.5266	-9.26892	-12.9191	-10.3481	-13.5916	-19.1928
360.5	606.5	11.1418	4.56998	-6.14375	-11.0238	-12.8008	-8.53599	-6.03689	-10.3973	-6.45093	-8.95546	-11.0164	-9.64887	-6.29466	-9.46343	-12.4919	-6.30638	-12.9408	-13.1873	-10.7999	-17.2438	-12.5006	-12.4131	-12.7693	-10.1758	-14.5331	-13.566	-10.6727	-10.0801	-12.4228	-14.6807	-13.6002	-11.0181	-15.1297	-11.9378	-10.7071	-8.89285	-11.6013	-11.8826	-13.7963	-10.6599	-11.9794	-9.39686	-14.7569	-12.1131	-14.2035	-8.85645	-11.2609	-14.1682
361.5	606.5	11.1419	4.56998	-4.25501	-9.13857	-12.1671	-8.95932	-3.88261	-10.3584	-5.5881	-9.85051	-11.1194	-10.7726	-7.81881	-10.9859	-13.1215	-6.61331	-11.5666	-11.9162	-8.73315	-16.4232	-11.5721	-11.0721	-11.808	-10.7445	-12.898	-13.1969	-11.2627	-12.1209	-11.31	-14.5666	-12.6399	-11.4951	-15.8858	-10.0008	-12.5225	-9.26482	-11.2779	-12.4914	-11.0067	-10.8198	-12.7916	-9.05226	-14.7698	-13.9396	-16.1397	-10.2457	-9.18788	-9.48148
362.5	606.5	11.142	4.56998	-5.82235	-6.32592	-8.69332	-10.4234	-4.56969	-8.84556	-6.75941	-11.6774	-8.80059	-11.863	-7.75559	-8.47129	-9.27478	-9.4082	-11.427	-11.0468	-7.29144	-13.1248	-10.9132	-10.3977	-10.7398	-12.8537	-12.457	-10.125	-14.9062	-13.3619	-9.51071	-13.2222	-13.5984	-13.1184	-15.3551	-8.8483	-11.4104	-9.52336	-11.8582	-12.3059	-10.0217	-12.5466	-12.4798	-8.24508	-12.1402	-15.0037	-15.1042	-11.7301	-10.4724	-7.92762
357.5	607.5	11.1415	4.56989	-7.54178	-8.53093	-9.89043	-8.85935	-9.89381	-11.2059	-8.17753	-8.01847	-7.62008	-6.75933	-7.74041	-8.06794	-6.84968	-12.8529	-16.0864	-11.0781	-11.3481	-13.4591	-15.2389	-11.3072	-13.0564	-10.0911	-12.242	-9.69255	-13.6975	-8.8304	-10.055	-11.808	-11.0206	-11.0519	-12.2854	-10.5506	-9.39991	-13.042	-13.4577	-11.1105	-11.8845	-8.34834	-11.894	-10.9638	-12.2209	-11.852	-10.2665	-13.0476	-13.0938	-12.6516
358.5	607.5	11.1416	4.56989	-7.6911	-8.69321	-11.2309	-8.21148	-10.7237	-9.2131	-8.0299	-7.97899	-7.16673	-8.4808	-8.18154	-11.708	-6.91961	-11.8612	-14.2399	-11.8312	-12.2138	-16.6152	-13.446	-10.4558	-12.487	-13.183	-14.3922	-9.68581	-12.9157	-9.57293	-11.9004	-15.1563	-11.2309	-11.5654	-12.3276	-13.3016	-11.8097	-11.1363	-11.9443	-9.00936	-13.43	-10.1731	-9.89839	-12.2439	-12.0193	-11.3519	-13.9255	-15.2888	-11.9594	-15.4586
359.5	607.5	11.1417	4.56989	-8.33723	-8.81567	-10.84	-9.21616	-10.4235	-8.71742	-8.76335	-7.75135	-6.933	-11.2557	-4.95221	-13.2807	-9.67063	-8.99777	-12.1697	-13.1977	-11.8363	-18.604	-13.626	-10.993	-13.9776	-12.6823	-13.3393	-11.95	-11.125	-10.4706	-11.7925	-15.8251	-11.1332	-11.7558	-13.7263	-10.7281	-11.1871	-8.97235	-13.3175	-9.93102	-15.8181	-11.0512	-9.86942	-9.89158	-13.5104	-12.6902	-14.0389	-11.0628	-12.3599	-15.981
360.5	607.5	11.1418	4.56989	-7.62202	-10.1316	-11.9917	-9.68006	-7.56428	-9.15685	-7.13663	-7.44492	-11.0236	-10.0972	-4.29711	-10.3392	-11.4835	-7.86576	-13.3311	-10.8766	-9.95386	-17.722	-13.1822	-12.0189	-12.0096	-10.5763	-11.651	-12.9987	-9.89776	-10.3761	-12.4529	-15.6343	-10.7624	-11.542	-13.3412	-9.84935	-11.072	-9.85302	-12.9916	-12.7545	-14.2298	-11.5737	-10.9585	-9.81658	-18.1238	-13.8913	-16.1382	-9.35697	-11.5274	-13.9149
361.5	607.5	11.1419	4.56989	-6.36445	-9.49343	-12.305	-10.4247	-5.26548	-8.2421	-6.54614	-8.82869	-11.787	-10.1378	-6.35675	-10.3339	-9.92689	-8.50544	-14.2902	-9.44128	-8.06231	-14.0465	-10.8756	-12.3263	-10.5342	-10.9876	-10.1922	-11.0954	-11.0128	-10.9435	-12.4989	-14.4485	-11.8844	-11.5153	-14.4769	-8.62443	-12.6054	-9.26268	-13.2491	-11.6322	-13.6576	-13.1309	-11.2426	-9.13361	-12.1865	-15.0152	-16.2241	-10.3227	-9.53774	-11.2658
362.5	607.5	11.142	4.56989	-7.8446	-6.13424	-9.49423	-10.7759	-5.75038	-7.86974	-6.56319	-10.2924	-8.30124	-10.9808	-9.02976	-9.34828	-8.53336	-10.4381	-13.5792	-9.6514	-7.12692	-12.1271	-9.35194	-11.0742	-10.5354	-11.6731	-9.45678	-8.8254	-13.3101	-11.7947	-11.3054	-12.6476	-12.2961	-10.4705	-16.5826	-8.25221	-12.6455	-8.15105	-13.9185	-11.1962	-12.8233	-14.4399	-11.4928	-9.05451	-10.7075	-16.3032	-14.6167	-11.7775	-9.72339	-8.91281
357.5	608.5	11.1415	4.5698	-6.93747	-8.91305	-8.31163	-8.38241	-9.62589	-11.8684	-9.02685	-8.18117	-8.85879	-8.07002	-8.25466	-9.33859	-8.64007	-13.4903	-13.5249	-11.6433	-12.3053	-13.8018	-14.3028	-9.70701	-14.826	-9.02045	-11.0007	-9.73738	-11.0428	-8.99553	-9.9154	-12.7757	-10.8246	-9.11352	-12.9505	-8.94097	-11.2531	-10.6315	-13.8953	-10.9315	-10.4656	-9.43091	-14.086	-11.6922	-10.578	-13.0057	-10.7314	-12.852	-14.6742	-12.5683
358.5	608.5	11.1416	4.5698	-7.83558	-8.4379	-9.3304	-6.73515	-9.44793	-10.6678	-8.18386	-8.47359	-7.38459	-8.77848	-7.50977	-11.768	-7.8905	-14.2312	-14.3212	-11.1403	-12.6043	-14.0927	-12.8163	-9.38702	-12.9103	-8.57842	-13.2067	-10.8922	-10.4453	-12.6701	-10.2345	-14.9967	-9.76365	-11.7207	-14.0632	-13.1788	-13.579	-7.33939	-13.8674	-9.87398	-13.2021	-10.1278	-12.9245	-12.5136	-10.1332	-12.6475	-13.1189	-11.6357	-12.9356	-13.6269
359.5	608.5	11.1417	4.5698	-8.33202	-7.32344	-9.65304	-6.50407	-10.1402	-10.1058	-6.19589	-8.31544	-5.72501	-10.1843	-5.29006	-11.8001	-9.58338	-11.653	-12.8416	-10.6137	-11.1339	-15.585	-12.3164	-9.89423	-12.7238	-8.793	-12.1522	-13.4153	-10.13	-13.0738	-10.2463	-16.2989	-8.00247	-12.8088	-14.0464	-9.80551	-11.8221	-8.90424	-14.9561	-12.2281	-14.3297	-10.2487	-10.9793	-11.081	-11.0046	-13.1895	-10.363	-9.13393	-11.7505	-12.9884
360.5	608.5	11.1418	4.5698	-8.21817	-7.52756	-9.58506	-8.31563	-9.79747	-8.71702	-4.80658	-8.03222	-8.29626	-9.90114	-4.6747	-10.436	-9.95485	-10.3489	-13.6261	-9.58757	-9.12131	-14.4332	-12.7449	-10.5213	-12.1128	-9.65976	-10.5824	-12.8913	-10.2118	-10.7265	-11.3596	-16.23	-7.96103	-13.1222	-13.4127	-9.03931	-10.9112	-9.16434	-14.1505	-12.5458	-12.3791	-12.1647	-10.3854	-9.67352	-13.678	-14.0428	-12.5548	-9.84894	-11.8508	-12.9898
361.5	608.5	11.1419	4.5698	-8.50084	-8.4359	-10.7614	-11.3926	-7.31484	-7.32805	-5.4388	-9.78879	-12.9468	-10.3296	-6.3281	-10.1407	-8.43431	-10.8255	-14.0366	-9.13046	-8.03417	-11.8108	-12.0888	-10.8127	-11.3783	-10.6559	-9.13527	-11.045	-11.7365	-10.5046	-12.6675	-14.0614	-9.51538	-12.0035	-14.0978	-9.41665	-11.7986	-8.58122	-14.8443	-11.1794	-11.8308	-13.9171	-10.6535	-9.35062	-10.1675	-14.4248	-13.0947	-11.4149	-12.0368	-13.6329
362.5	608.5	11.142	4.5698	-8.79467	-6.70688	-10.708	-9.74482	-6.78118	-8.13064	-6.14675	-10.5728	-10.5441	-10.6802	-8.92196	-9.8144	-8.95902	-11.511	-11.9663	-10.4674	-7.99302	-10.3951	-9.88506	-10.4432	-12.0704	-10.5721	-8.05531	-9.22763	-13.736	-11.4132	-13.1342	-12.7984	-10.1522	-9.94711	-15.4762	-10.0981	-11.873	-6.96991	-14.842	-11.1519	-12.2878	-12.2924	-10.2011	-10.4351	-9.54558	-15.013	-12.6976	-13.1419	-11.0737	-11.9174
357.5	609.5	11.1415	4.56971	-6.88162	-10.6587	-6.77239	-7.88107	-8.6978	-11.193	-10.7583	-8.24615	-9.1669	-9.09085	-8.91596	-9.88124	-9.71328	-10.6129	-12.1174	-12.4435	-12.2008	-12.6307	-14.7857	-9.78923	-14.6559	-10.1104	-9.97696	-11.4115	-10.9725	-9.94399	-9.31329	-13.9431	-10.7067	-8.12894	-12.4686	-10.6467	-10.8002	-8.15848	-9.95953	-11.5121	-10.205	-9.86034	-13.6299	-11.7547	-9.56603	-12.2353	-9.80778	-12.6176	-14.5196	-12.136
358.5	609.5	11.1416	4.56971	-8.33041	-10.0789	-7.90125	-4.98965	-7.84869	-10.2482	-9.67146	-9.42149	-8.12053	-9.9604	-8.67063	-9.91664	-7.91972	-10.4831	-12.1616	-10.5251	-12.3525	-10.9427	-13.6748	-10.032	-12.4051	-8.99609	-11.0627	-12.0275	-9.6309	-15.9232	-9.03361	-14.8886	-8.79466	-9.74985	-15.4457	-12.9055	-11.5749	-8.20306	-13.7854	-11.0902	-12.9978	-9.16386	-14.637	-11.9402	-9.58891	-11.626	-10.2214	-9.16395	-12.3738	-12.9298
359.5	609.5	11.1417	4.56971	-9.99957	-7.34983	-8.42278	-4.10737	-8.28591	-8.9236	-5.4764	-10.2947	-6.71841	-9.38531	-7.76349	-9.36048	-8.79823	-9.32943	-11.9545	-9.41101	-10.514	-11.5046	-12.2104	-11.3255	-12.8796	-9.02989	-12.2316	-14.5384	-9.72581	-14.9108	-9.55357	-17.9202	-7.72145	-11.8195	-14.4331	-9.81839	-12.5264	-10.9284	-15.0618	-11.5032	-12.9284	-10.8948	-12.3764	-11.0688	-10.5298	-11.6691	-8.65502	-8.62216	-10.4434	-13.5753
360.5	609.5	11.1418	4.56971	-10.3167	-6.21558	-7.55208	-5.92707	-8.31301	-6.85126	-3.21333	-10.6677	-8.4607	-10.0623	-7.23573	-8.50562	-9.26934	-9.05928	-12.4923	-10.0748	-8.8214	-12.1093	-11.3623	-11.9574	-12.8563	-10.2177	-11.8179	-14.3694	-11.5299	-12.3579	-10.2194	-15.1008	-7.26714	-11.8901	-11.7447	-9.71678	-10.5303	-11.3386	-13.8766	-10.2216	-11.9615	-12.5874	-11.0778	-9.79154	-11.9901	-13.3353	-11.0309	-9.45789	-10.7569	-14.1575
361.5	609.5	11.1419	4.56971	-10.3242	-7.22573	-7.8989	-9.43481	-6.83558	-5.76049	-4.15027	-11.5804	-12.8674	-11.517	-7.60702	-8.04533	-8.10466	-11.4566	-11.7139	-10.5089	-9.01072	-10.6033	-13.3673	-12.8679	-11.8517	-10.8204	-10.8448	-12.4203	-12.9931	-11.3084	-11.3099	-12.2918	-8.43693	-11.59	-10.9634	-10.5197	-10.1378	-7.892	-14.8515	-10.8577	-11.0445	-12.2218	-11.2579	-10.3436	-9.78966	-13.1763	-12.271	-11.4944	-11.1121	-14.8593
362.5	609.5	11.142	4.56971	-8.62416	-7.28599	-9.85141	-9.64197	-6.84517	-6.6597	-6.5342	-11.556	-13.098	-10.7146	-8.54706	-7.55128	-7.82517	-12.6298	-11.3835	-11.7311	-9.75867	-9.68191	-11.0181	-11.745	-12.2386	-10.1343	-9.55176	-11.9688	-13.2254	-11.4665	-12.5344	-11.9017	-10.1222	-12.5823	-12.1089	-12.5775	-10.4857	-5.62977	-14.34	-11.4914	-11.1789	-9.60344	-10.7562	-11.2903	-8.75743	-12.3698	-13.0309	-14.6345	-12.0351	-13.4641
359.5	610.5	11.1417	4.56962	-8.1149	-7.94843	-8.97604	-3.2532	-8.13013	-7.9655	-7.18481	-11.9003	-8.85649	-7.84481	-8.14983	-8.1254	-8.51227	-6.73923	-11.2122	-11.9375	-10.9319	-11.5915	-13.5361	-14.214	-11.9181	-12.1515	-11.9278	-14.0128	-8.63229	-12.0685	-10.1839	-12.6871	-9.77901	-10.9796	-14.8934	-10.554	-12.7624	-12.1875	-12.3803	-10.9636	-14.4545	-12.8207	-12.4907	-10.7655	-13.4848	-12.8644	-10.0076	-9.47516	-10.1806	-15.4713
360.5	610.5	11.1418	4.56962	-9.84728	-5.27311	-7.958	-4.55772	-8.26755	-5.87584	-4.05744	-11.3159	-11.1364	-7.42863	-7.44801	-6.6854	-9.25326	-7.35426	-10.7291	-11.8051	-9.3972	-11.3251	-11.3889	-13.9446	-11.3512	-11.6444	-12.3748	-13.6547	-11.383	-12.7641	-10.6298	-11.6365	-9.28216	-11.3497	-9.50554	-10.0613	-10.2883	-9.85615	-11.7947	-11.1015	-13.2531	-13.308	-11.1748	-10.6483	-15.2012	-14.7661	-11.9786	-9.26469	-11.5789	-15.7081
361.5	610.5	11.1419	4.56962	-10.8638	-6.01803	-8.11264	-8.37892	-7.35001	-4.56666	-4.77425	-11.6378	-13.638	-9.20508	-7.22087	-6.19119	-9.04128	-11.1659	-9.54815	-11.5832	-9.51657	-9.61597	-13.0733	-14.7	-10.443	-10.2966	-13.5166	-10.0671	-12.8858	-12.1527	-11.6224	-11.2959	-9.48314	-12.401	-7.7517	-9.90753	-9.23716	-5.59199	-13.5427	-12.6109	-12.1009	-11.4449	-10.9405	-11.4276	-11.8915	-13.9151	-11.9872	-10.2879	-11.0326	-14.7429
350.5	620.5	11.1409	4.56874	-8.21185	-8.89045	-11.9566	-8.29711	-11.2143	-10.5625	-10.4902	-10.9859	-9.21932	-7.72299	-8.62691	-5.77491	-9.71682	-10.5926	-11.3834	-14.2988	-16.3241	-14.2005	-15.1592	-11.6134	-10.9445	-12.9541	-9.69098	-14.1286	-12.0483	-8.51469	-11.2306	-16.1777	-11.7235	-9.68407	-9.1715	-9.01214	-9.96524	-6.47257	-11.373	-11.9963	-10.2626	-9.19013	-11.4754	-8.84807	-7.80075	-11.656	-11.4124	-12.9936	-12.974	-11.841
351.5	620.5	11.141	4.56874	-6.77125	-11.6236	-9.18807	-7.74775	-10.8584	-8.56877	-11.2114	-9.82558	-9.96757	-6.25089	-9.26486	-5.84309	-7.93276	-9.02875	-14.8043	-13.1014	-14.6915	-14.958	-18.5358	-11.129	-12.6359	-12.7408	-9.91133	-15.8739	-14.7044	-9.17352	-12.6989	-17.3428	-13.7198	-10.3254	-10.0659	-13.8343	-11.4316	-7.31954	-10.0813	-12.2075	-13.3956	-9.80813	-11.9978	-9.98898	-11.2015	-14.2924	-12.8171	-15.2364	-11.3942	-13.4637
349.5	621.5	11.1408	4.56865	-9.27749	-6.72465	-14.156	-11.5972	-11.5597	-11.7471	-10.3865	-10.681	-8.17379	-11.6831	-5.75291	-8.33291	-10.8218	-14.1582	-11.9203	-10.9649	-14.3123	-13.4721	-12.939	-13.6902	-9.7273	-11.9354	-8.61292	-10.6279	-10.5721	-11.0827	-13.4551	-12.7048	-8.86427	-11.2973	-8.80795	-9.83033	-8.98264	-6.46725	-11.1436	-12.8871	-5.47106	-12.728	-9.86719	-6.21128	-9.12451	-8.83837	-12.713	-10.689	-10.5261	-13.3018
350.5	621.5	11.1409	4.56865	-8.46406	-8.36773	-9.88387	-9.80034	-11.9382	-11.1499	-12.655	-10.0339	-8.70332	-8.61275	-9.02714	-5.60683	-10.5343	-12.7682	-12.1126	-13.4475	-15.5282	-13.6797	-13.6189	-13.0994	-10.1372	-12.2063	-9.29735	-11.8327	-14.1012	-8.65353	-11.9671	-16.7167	-12.22	-9.8945	-12.0487	-10.6813	-9.57039	-7.96154	-14.8434	-13.7622	-9.5273	-11.8192	-12.8247	-9.43469	-11.107	-12.2199	-13.6796	-13.2026	-11.1569	-13.2839
351.5	621.5	11.141	4.56865	-7.93057	-9.37991	-7.35865	-7.74923	-10.9219	-9.72861	-13.3781	-10.2641	-10.1745	-6.01551	-8.80815	-5.46535	-9.31076	-10.1729	-14.4098	-14.4742	-12.6608	-15.1523	-18.9813	-10.7006	-11.7615	-13.076	-10.4404	-15.6787	-16.5822	-7.90693	-11.9078	-17.1377	-12.8544	-9.24474	-11.7357	-14.0291	-9.98661	-9.03303	-13.0638	-12.2076	-11.0674	-11.1041	-12.8667	-10.4066	-12.5393	-14.3918	-15.0203	-15.0162	-10.1115	-14.9788
348.5	622.5	11.1407	4.56856	-9.33129	-7.11314	-13.7963	-11.0605	-10.7232	-12.9958	-9.57316	-11.5152	-10.7025	-14.4534	-7.94078	-11.6261	-9.90833	-14.6252	-12.3917	-12.8446	-11.3362	-14.6975	-11.9523	-14.3851	-11.6497	-10.3092	-9.96898	-10.7349	-10.117	-11.4065	-11.2563	-11.6519	-9.03144	-9.80828	-11.1214	-11.9626	-12.6202	-6.31068	-10.383	-6.79623	-5.70781	-8.90556	-11.1582	-5.91748	-13.2373	-10.392	-12.1813	-11.197	-9.80507	-13.203
349.5	622.5	11.1408	4.56856	-8.79008	-7.92603	-12.4656	-10.8975	-11.1065	-11.9244	-10.2717	-11.8952	-10.0414	-13.4146	-6.72754	-9.73011	-11.1834	-16.0927	-12.3514	-12.5512	-11.8104	-13.0211	-11.6728	-16.6962	-9.65643	-10.1861	-8.93125	-10.5325	-12.3722	-10.8563	-12.5452	-13.1803	-10.1664	-12.1903	-11.8341	-14.3193	-10.7374	-7.61806	-14.5984	-10.512	-8.50429	-8.10619	-12.9948	-7.86439	-16.3906	-11.5087	-12.8303	-11.3839	-11.4909	-12.5009
350.5	622.5	11.1409	4.56856	-7.59992	-9.16843	-9.82892	-11.8788	-11.4707	-10.6502	-13.1917	-11.4386	-9.38355	-9.48125	-9.06909	-7.00347	-10.879	-13.279	-12.2872	-14.5895	-11.6727	-12.9111	-12.5224	-14.7635	-9.45976	-10.8173	-9.63973	-11.0731	-13.7733	-9.77662	-12.4289	-15.4375	-13.5044	-10.9782	-15.6803	-12.732	-8.75491	-8.78556	-15.9493	-11.4272	-11.6934	-11.3773	-12.9765	-10.2771	-15.0988	-14.7092	-14.3388	-12.9088	-12.4725	-13.6243
351.5	622.5	11.141	4.56856	-8.09478	-8.61048	-7.77241	-8.77839	-9.78202	-10.1529	-11.5527	-10.5066	-10.3911	-7.55355	-9.10518	-5.51301	-10.5992	-10.0928	-11.8317	-15.739	-11.3721	-13.876	-15.5238	-11.481	-10.5648	-12.0098	-12.2319	-12.467	-15.3041	-8.62064	-11.5104	-16.1694	-13.2353	-8.54332	-12.7934	-10.3266	-10.1186	-9.08965	-12.6952	-9.96286	-11.0396	-10.987	-11.805	-11.7839	-14.4051	-13.4207	-14.4828	-14.1504	-10.7559	-16.3356
352.5	622.5	11.141	4.56855	-8.47388	-8.16304	-6.54802	-7.42445	-9.07401	-9.69038	-9.98573	-10.2375	-9.39763	-8.5656	-7.13179	-7.26657	-10.4152	-8.85297	-11.1923	-14.994	-12.3386	-14.4151	-17.3172	-11.4966	-12.4185	-10.5176	-12.148	-13.7861	-14.4045	-8.96941	-10.5746	-13.7939	-11.2081	-9.64057	-10.2463	-10.241	-8.69885	-9.40675	-12.7018	-8.72993	-10.5644	-11.4051	-12.033	-11.3072	-12.1699	-12.295	-13.6452	-13.4056	-10.2265	-17.6138
346.5	623.5	11.1405	4.56847	-5.70953	-6.16824	-11.2005	-12.6124	-9.58907	-11.522	-8.75108	-16.6652	-12.2016	-10.2522	-8.25585	-11.3094	-12.5748	-10.084	-11.9531	-14.3602	-16.4405	-12.3817	-12.1126	-10.1345	-11.5723	-14.5942	-12.1085	-13.3212	-10.7944	-11.701	-8.90316	-10.1048	-9.95198	-8.56785	-7.58866	-9.07209	-10.2613	-6.87945	-7.6788	-6.10539	-10.0101	-14.9352	-11.6481	-9.71588	-10.8202	-10.3844	-14.6595	-11.4987	-11.3879	-10.3715
347.5	623.5	11.1406	4.56847	-5.8602	-7.24077	-13.7253	-10.7991	-11.3064	-13.0112	-11.5	-13.8303	-10.4365	-12.7331	-10.1022	-11.0863	-9.05869	-13.8094	-12.0771	-14.6967	-14.1852	-13.6958	-12.5643	-12.7275	-9.6504	-13.0309	-11.0542	-12.0195	-11.6571	-8.61917	-7.45964	-10.7009	-10.598	-9.21276	-11.376	-8.13519	-10.0362	-7.34866	-8.69968	-6.27268	-8.70598	-13.981	-16.4519	-9.29262	-12.3183	-10.4202	-14.592	-12.371	-12.1334	-13.565
348.5	623.5	11.1407	4.56847	-6.20311	-8.1086	-11.3821	-9.3025	-10.6037	-14.6834	-9.35536	-11.7395	-10.3371	-14.5463	-8.33448	-8.47392	-8.36362	-13.8235	-13.949	-17.7052	-11.0853	-14.0276	-10.4913	-14.7035	-9.38041	-11.1207	-10.874	-11.6408	-11.5588	-7.04061	-8.23305	-13.3265	-10.7121	-9.52503	-10.9045	-10.3384	-11.8724	-7.30504	-11.5891	-7.21777	-9.94132	-8.37041	-15.052	-9.40352	-13.3499	-9.97877	-13.6243	-13.2168	-12.6015	-12.9017
349.5	623.5	11.1408	4.56847	-5.691	-7.94707	-9.40214	-9.1795	-11.7995	-12.2566	-9.76554	-11.2169	-9.30331	-12.4263	-6.78753	-7.73779	-9.91425	-13.9538	-14.4602	-17.2328	-10.6038	-12.4046	-9.92429	-15.0927	-8.9089	-9.53497	-10.7886	-12.0328	-10.8598	-7.87513	-9.1409	-13.6071	-12.06	-11.8085	-11.9472	-13.5001	-12.3262	-7.23632	-14.9734	-9.08881	-10.41	-6.91253	-14.0566	-10.8315	-13.6337	-12.2411	-12.7618	-13.5986	-13.9093	-12.5371
350.5	623.5	11.1409	4.56847	-5.77697	-9.42132	-9.24993	-10.8523	-9.84857	-9.7435	-11.4681	-9.43346	-9.17566	-9.57081	-8.47876	-6.54017	-9.44573	-12.3545	-13.3038	-14.6086	-10.8448	-11.4346	-11.5576	-14.2422	-9.9633	-9.43563	-10.8564	-11.3742	-11.4247	-9.83724	-11.5956	-13.6941	-14.1707	-13.45	-15.5804	-12.7839	-9.84469	-7.99723	-11.9373	-9.24195	-10.9655	-11.1523	-13.727	-11.1394	-14.6639	-14.8404	-11.4062	-12.4087	-14.6016	-14.2655
351.5	623.5	11.141	4.56847	-7.46748	-9.0965	-9.13877	-9.72202	-7.69425	-9.50083	-9.69521	-8.28954	-10.8086	-8.35346	-9.26389	-4.88403	-8.13242	-9.39212	-11.5106	-14.7686	-11.2638	-10.8078	-13.0085	-12.9031	-11.2503	-11.303	-11.8012	-10.43	-12.3407	-8.55988	-11.9801	-14.6926	-13.1695	-10.4428	-13.8614	-10.0211	-9.54217	-8.50024	-10.2983	-7.94201	-10.3746	-10.2501	-10.9849	-13.1637	-14.5768	-12.7764	-10.8722	-12.0791	-13.1362	-16.0333
352.5	623.5	11.141	4.56847	-8.19115	-8.85347	-8.06687	-9.1272	-7.78347	-9.80938	-9.19711	-8.4703	-9.81023	-8.55077	-7.58781	-5.51131	-8.61394	-7.94929	-11.0699	-15.6224	-11.8609	-10.4552	-12.8124	-12.9083	-11.4443	-11.795	-11.7722	-11.34	-11.5248	-7.60606	-10.2199	-14.5689	-12.7204	-10.8696	-10.4565	-9.31139	-8.15789	-8.64227	-11.7	-7.16246	-10.0837	-9.75082	-9.44438	-11.4375	-10.7393	-11.2865	-12.1356	-9.87822	-11.9456	-14.9908
353.5	623.5	11.1411	4.56846	-7.72371	-8.70873	-7.39333	-10.1196	-8.56352	-10.2846	-10.1819	-9.02174	-7.70529	-8.73853	-7.4825	-8.86933	-10.5394	-8.26164	-9.94827	-14.5367	-12.7994	-12.2001	-13.0696	-13.3246	-14.2211	-13.0788	-12.0374	-11.593	-11.6168	-8.43952	-10.7923	-12.028	-14.1301	-14.5982	-10.9629	-10.4946	-9.58626	-8.51444	-14.6091	-9.60793	-12.0885	-11.34	-10.3959	-10.4283	-10.4699	-11.8474	-12.2491	-9.65831	-13.0671	-14.6565
347.5	624.5	11.1406	4.56838	-5.5801	-7.92106	-11.8254	-10.9452	-10.4552	-11.5249	-11.624	-13.6945	-8.34243	-14.0128	-7.99827	-10.6792	-9.97141	-12.5285	-13.2537	-15.3378	-11.9626	-13.7182	-13.1261	-11.4995	-8.71741	-11.5333	-13.6807	-12.4324	-13.4586	-8.07446	-5.99258	-10.82	-11.432	-10.2506	-11.4493	-9.99275	-10.2503	-7.52511	-8.85121	-8.75763	-10.8367	-14.4065	-15.6325	-13.0511	-11.4361	-10.8017	-16.4242	-10.04	-13.1031	-14.4507
348.5	624.5	11.1407	4.56838	-3.37541	-8.86892	-9.31469	-10.3066	-11.2953	-12.235	-10.0994	-11.3293	-10.4203	-13.0796	-7.76652	-7.01995	-8.48106	-11.5562	-13.985	-17.5535	-10.7104	-14.1672	-10.4763	-13.2937	-8.94533	-11.1649	-13.9475	-13.3927	-11.8346	-6.98133	-6.38606	-13.1438	-11.5663	-11.227	-10.6138	-9.26636	-10.7991	-7.51747	-12.1962	-9.9589	-11.3805	-9.85274	-14.2246	-12.7157	-12.2445	-11.6153	-14.9249	-10.8347	-13.7461	-14.5278
349.5	624.5	11.1408	4.56838	-2.29577	-8.09323	-8.28977	-9.46958	-12.2278	-11.3185	-8.19396	-9.21937	-10.0357	-9.86158	-7.22058	-6.16598	-9.60553	-10.7956	-13.3721	-13.8326	-11.0419	-11.3462	-10.224	-13.1667	-9.28272	-9.49501	-12.4794	-12.7816	-9.78523	-7.85639	-7.18518	-12.9307	-12.4579	-10.1071	-11.3617	-10.8604	-13.8374	-7.28068	-13.0664	-10.2336	-10.8829	-8.7471	-13.6977	-13.5167	-13.2352	-13.9972	-11.9395	-11.9997	-14.6759	-14.038
350.5	624.5	11.1409	4.56838	-4.04541	-9.50829	-8.45793	-9.27351	-8.47354	-10.2359	-8.98675	-7.11368	-9.1631	-8.34397	-9.14568	-5.82616	-9.74327	-10.4675	-13.8451	-11.1511	-11.5407	-9.78162	-12.3171	-12.6448	-11.0901	-9.0102	-10.844	-11.153	-11.0635	-9.70129	-10.4182	-12.7797	-12.2672	-10.8848	-12.6545	-12.4548	-11.9581	-7.53281	-10.8225	-9.51139	-10.1779	-9.72989	-13.6104	-13.0549	-15.3913	-15.5897	-10.5966	-11.1921	-15.5768	-14.0873
351.5	624.5	11.141	4.56838	-7.23489	-10.096	-8.74497	-9.09912	-7.66467	-9.16362	-10.1707	-6.46939	-11.1077	-7.92963	-9.53928	-5.29961	-8.97077	-9.51707	-11.7188	-11.9514	-11.6794	-9.5232	-12.109	-11.245	-12.1763	-11.1315	-9.70029	-10.102	-11.8835	-8.07194	-12.5502	-13.1353	-12.2719	-10.5732	-12.5374	-12.162	-9.11791	-8.79216	-9.27258	-7.17237	-8.24991	-9.31351	-12.4301	-13.3139	-14.3888	-15.4054	-10.2332	-10.496	-13.4036	-14.2927
352.5	624.5	11.141	4.56838	-7.33638	-9.53119	-8.36949	-9.84277	-7.08454	-8.19999	-8.99432	-7.07463	-10.557	-7.6082	-7.36109	-6.11725	-8.9292	-7.04151	-10.7731	-12.866	-12.727	-10.1187	-10.8528	-11.8999	-11.2923	-12.8944	-9.83354	-10.8102	-10.4397	-7.0941	-10.161	-12.8858	-12.6678	-12.8157	-10.1463	-11.4603	-8.48573	-7.787	-9.31353	-6.94658	-8.2019	-9.9738	-11.7209	-11.1611	-11.076	-13.3047	-11.2693	-9.13854	-11.7016	-12.4514
347.5	625.5	11.1406	4.56829	-6.70871	-7.32952	-8.99824	-11.8639	-8.88345	-10.5725	-11.6548	-11.0505	-7.7117	-10.9956	-6.59829	-9.16756	-11.138	-10.4517	-12.7031	-14.1616	-9.41297	-12.2779	-13.8749	-11.1002	-9.81697	-10.1279	-12.5918	-10.5677	-11.8559	-9.28289	-7.31031	-11.267	-13.455	-10.2933	-10.4802	-9.95191	-11.1073	-7.78296	-10.3607	-10.0482	-11.4961	-14.4221	-11.6122	-16.5503	-11.6855	-10.9996	-15.3677	-9.7254	-11.7491	-12.8715
348.5	625.5	11.1407	4.56829	-2.45431	-7.93051	-7.68919	-12.3884	-11.3734	-10.1092	-9.30173	-10.6392	-10.5405	-11.0773	-6.79595	-8.19885	-10.3737	-10.0334	-10.1045	-12.9047	-9.43207	-13.1485	-11.0233	-12.1899	-10.1566	-10.4076	-13.9313	-12.2504	-10.6023	-9.95267	-7.74381	-11.7118	-12.9174	-11.8339	-11.2022	-9.24452	-10.4376	-7.78532	-10.9958	-12.9325	-12.0763	-10.5555	-13.1923	-14.2752	-13.1114	-12.3097	-13.9393	-9.4373	-12.4523	-11.4412
349.5	625.5	11.1408	4.56829	-1.08213	-8.35541	-9.14626	-9.44431	-11.2244	-9.36285	-5.73792	-8.53805	-11.6531	-8.68399	-6.99203	-6.64681	-9.85771	-9.99663	-9.75677	-10.4398	-10.7869	-10.7823	-11.2797	-11.315	-10.0734	-9.8112	-12.0145	-11.4325	-10.5358	-11.2051	-7.75429	-11.8885	-12.6476	-8.27416	-11.0576	-9.46389	-12.4135	-7.44362	-10.5916	-12.8998	-11.5166	-8.61277	-13.0871	-13.441	-13.5454	-14.5642	-10.5667	-9.2534	-13.301	-11.4207
350.5	625.5	11.1409	4.56829	-3.06523	-9.60191	-9.04777	-7.46628	-7.42026	-11.3384	-6.58809	-6.88601	-10.558	-7.05731	-10.313	-6.25419	-9.44183	-10.1102	-11.8406	-9.62586	-11.4625	-9.25818	-13.0699	-11.4032	-11.3714	-9.70325	-11.1507	-10.9839	-12.8528	-10.4866	-10.6449	-12.4715	-11.0074	-8.8591	-10.7922	-10.2322	-11.0919	-10.4762	-10.7582	-9.51682	-9.70421	-7.26491	-11.6539	-12.5395	-13.0184	-16.599	-11.2508	-9.65888	-12.6401	-12.5949
351.5	625.5	11.141	4.56829	-6.35166	-11.428	-8.33565	-8.31028	-8.78643	-7.74064	-10.1206	-6.61078	-11.7564	-7.61717	-9.79413	-7.07729	-9.9393	-10.4567	-11.2568	-11.0857	-11.8186	-9.72659	-11.4169	-10.6174	-12.9477	-11.5385	-10.3296	-11.0167	-13.9016	-9.05625	-12.2249	-12.0697	-10.9848	-12.0895	-12.4228	-11.7379	-7.97049	-10.0437	-10.3853	-7.37856	-8.51572	-8.0802	-10.9909	-12.8158	-13.9302	-16.7096	-12.7879	-9.86055	-10.5954	-13.1183
348.5	626.5	11.1407	4.5682	-3.66792	-7.2253	-6.7271	-11.981	-10.8035	-11.2024	-8.12922	-9.75571	-10.5146	-8.05183	-5.79371	-7.12212	-11.6127	-10.9112	-8.93186	-13.2892	-8.70136	-14.2771	-12.524	-11.8739	-10.8961	-10.1888	-11.9483	-10.5761	-10.5763	-10.8328	-10.5542	-11.5265	-13.1093	-9.91071	-10.1801	-7.89848	-10.4223	-7.57332	-7.89584	-11.1871	-13.1548	-10.8449	-12.6105	-12.5368	-13.1486	-10.8336	-12.8472	-11.5539	-11.3355	-10.5041
349.5	626.5	11.1408	4.5682	-1.99414	-7.59984	-9.63954	-8.18547	-10.3619	-11.6553	-5.06856	-9.66793	-10.4702	-6.57031	-6.42973	-6.50922	-9.37454	-11.1194	-8.96101	-11.2189	-9.41659	-11.9266	-11.605	-10.371	-10.3088	-9.35444	-12.2182	-10.0856	-11.3489	-10.6917	-10.2527	-11.0896	-14.4111	-6.83705	-10.0086	-8.21302	-10.5459	-10.4042	-8.66098	-10.5871	-10.5033	-8.16688	-12.0418	-9.96606	-13.7537	-11.6784	-10.3398	-12.5696	-10.8548	-10.5841
350.5	626.5	11.1409	4.5682	-3.2938	-8.46768	-10.3068	-6.6502	-8.25322	-11.3304	-6.00776	-8.42922	-10.6956	-6.8971	-8.68993	-6.59951	-8.6902	-10.276	-11.0605	-10.6527	-10.59	-9.98554	-11.9142	-11.0324	-10.1301	-10.081	-13.3048	-11.5965	-12.3691	-9.53415	-11.1032	-11.3745	-10.3519	-8.01148	-8.98109	-8.20902	-8.10763	-12.4336	-10.7755	-8.54622	-8.03548	-6.7881	-10.6978	-9.18427	-12.6527	-12.4638	-11.2941	-10.4805	-10.3883	-11.1032
[truncated: 6 more columns]

## Sheet: CoAF
Pixel-X	Pixel-Y	Longitude	Latitude	Sigma0_VV_db_mst_07Apr2015	Sigma0_VV_db_slv2_25May2015	Sigma0_VV_db_slv4_06Jun2015	Sigma0_VV_db_slv6_18Jun2015	Sigma0_VV_db_slv8_12Jul2015	Sigma0_VV_db_slv10_24Jul2015	Sigma0_VV_db_slv16_05Aug2015	Sigma0_VV_db_slv18_17Aug2015	Sigma0_VV_db_slv20_10Sep2015	Sigma0_VV_db_slv22_22Sep2015	Sigma0_VV_db_slv24_04Oct2015	Sigma0_VV_db_slv26_16Oct2015	Sigma0_VV_db_slv28_28Oct2015	Sigma0_VV_db_slv30_21Nov2015	Sigma0_VV_db_slv32_03Dec2015	Sigma0_VV_db_slv34_15Dec2015	Sigma0_VV_db_slv36_08Jan2016	Sigma0_VV_db_slv38_20Jan2016	Sigma0_VV_db_slv40_13Feb2016	Sigma0_VV_db_slv42_08Mar2016	Sigma0_VV_db_slv44_20Mar2016	Sigma0_VV_db_slv46_01Apr2016	Sigma0_VV_db_slv48_13Apr2016	Sigma0_VV_db_slv50_07May2016	Sigma0_VV_db_slv54_19May2016	Sigma0_VV_db_slv56_31May2016	Sigma0_VV_db_slv58_12Jun2016	Sigma0_VV_db_slv60_06Jul2016	Sigma0_VV_db_slv62_18Jul2016	Sigma0_VV_db_slv64_30Jul2016	Sigma0_VV_db_slv66_11Aug2016	Sigma0_VV_db_slv68_23Aug2016	Sigma0_VV_db_slv70_04Sep2016	Sigma0_VV_db_slv72_16Sep2016	Sigma0_VV_db_slv74_28Sep2016	Sigma0_VV_db_slv76_10Oct2016	Sigma0_VV_db_slv78_22Oct2016	Sigma0_VV_db_slv80_03Nov2016	Sigma0_VV_db_slv82_15Nov2016	Sigma0_VV_db_slv84_27Nov2016	Sigma0_VV_db_slv86_21Dec2016	Sigma0_VV_db_slv88_02Jan2017	Sigma0_VV_db_slv90_14Jan2017	Sigma0_VV_db_slv92_26Jan2017	Sigma0_VV_db_slv94_07Feb2017	Sigma0_VV_db_slv96_19Feb2017
315.5	498.5	11.1379	4.5797	-8.38807	-6.36617	-4.96194	-6.2341	-7.54304	-10.3104	-4.19024	-11.0497	-8.50871	-5.84824	-4.15015	-5.65332	-6.85174	-7.00741	-8.73084	-10.0817	-9.27218	-13.4722	-11.6882	-8.08616	-8.89058	-7.8782	-7.70183	-9.17274	-10.1882	-8.78946	-13.7745	-15.9569	-11.9173	-7.30041	-9.96184	-9.49242	-11.7626	-9.08026	-7.6833	-9.90603	-11.3805	-8.15548	-10.1351	-10.8266	-8.27514	-9.94512	-8.78328	-11.2632	-7.38305	-6.77364
316.5	498.5	11.138	4.5797	-5.94078	-7.7393	-3.54002	-6.07095	-11.4181	-16.9148	-6.30893	-6.55281	-7.10291	-5.46996	-4.15041	-6.56751	-6.61816	-7.76696	-6.81234	-9.26586	-10.3695	-12.1163	-10.0963	-7.69289	-9.59121	-6.625	-8.17954	-8.97919	-7.26213	-6.99963	-13.4031	-10.7695	-9.84184	-8.05252	-10.1439	-9.38745	-6.51608	-9.54878	-6.84894	-6.39557	-9.84072	-8.87262	-8.24151	-9.02958	-5.45392	-7.53872	-6.97434	-8.22052	-6.96446	-7.64951
317.5	498.5	11.1381	4.57969	-5.01334	-6.51718	-5.35164	-5.53028	-8.28259	-12.4421	-6.05589	-5.44012	-5.98186	-7.52303	-4.65755	-8.89676	-8.32353	-10.0631	-7.40952	-9.6303	-11.5121	-9.75815	-7.79984	-9.06905	-10.9651	-6.99636	-9.7584	-10.0279	-7.86567	-5.94791	-11.4353	-8.77415	-7.6267	-11.0243	-9.28546	-10.9946	-3.81483	-10.459	-7.65404	-4.81461	-8.52257	-10.9847	-9.54112	-7.87428	-2.90628	-7.48456	-5.69904	-7.9923	-8.74488	-9.0304
314.5	499.5	11.1378	4.57961	-9.50933	-6.44969	-7.99255	-5.58366	-4.84289	-7.40478	-4.7765	-6.05669	-8.38951	-7.50744	-7.05926	-6.49904	-5.52757	-9.00842	-9.46275	-14.3251	-12.1214	-14.5326	-11.9191	-13.0765	-10.78	-10.2496	-10.4269	-15.3654	-11.3231	-10.6382	-14.0306	-13.1258	-9.19405	-9.03079	-7.89425	-11.7239	-6.85341	-9.28636	-8.04456	-13.6697	-13.7216	-9.19693	-8.15495	-12.8471	-7.84987	-8.38659	-7.02257	-10.8187	-12.8755	-10.2969
315.5	499.5	11.1379	4.57961	-7.52926	-6.87952	-6.85633	-5.26548	-4.86208	-7.89784	-5.85425	-8.98255	-8.74466	-5.85248	-5.89203	-6.12969	-8.37125	-7.39313	-8.23313	-12.6093	-8.78094	-15.9618	-10.4498	-8.30171	-10.6127	-8.07027	-9.45234	-11.7542	-11.436	-9.84119	-16.456	-16.5164	-11.0487	-9.69612	-8.79066	-11.5292	-8.6414	-9.08269	-8.24899	-11.3153	-12.1454	-9.10496	-8.87873	-12.0415	-7.09775	-9.81789	-8.61012	-11.3037	-10.9507	-7.10242
316.5	499.5	11.138	4.57961	-5.89755	-6.76164	-5.27191	-5.47156	-7.36787	-8.04166	-6.22628	-9.52816	-7.83415	-5.39443	-6.31642	-7.53371	-8.29463	-7.49125	-7.05848	-11.1022	-7.70822	-13.5099	-8.34067	-6.95504	-11.4173	-8.40901	-9.54745	-10.0077	-9.57717	-11.1444	-13.1722	-12.2302	-10.8783	-10.5218	-9.6617	-11.0984	-8.08846	-10.1916	-7.56877	-9.39163	-10.5366	-10.9742	-9.18028	-9.93595	-6.93466	-10.2872	-9.48054	-9.20457	-10.9176	-7.68607
317.5	499.5	11.1381	4.57961	-5.71151	-7.06991	-6.11791	-6.92781	-8.16428	-8.89815	-5.949	-9.81656	-6.54455	-6.39975	-6.10111	-7.93389	-10.1791	-10.1329	-6.8709	-9.05922	-9.65672	-12.0646	-7.60271	-7.21382	-10.7506	-10.0802	-11.0307	-9.80494	-9.88825	-10.1445	-9.58729	-9.41813	-10.0413	-13.7684	-9.99722	-10.8317	-5.97914	-11.8605	-7.06811	-8.23761	-9.51685	-13.3061	-10.5435	-8.6688	-5.84088	-9.9253	-9.71906	-9.27256	-12.1405	-10.5
314.5	500.5	11.1378	4.57952	-12.1551	-6.67655	-8.86329	-6.41649	-6.00277	-6.62017	-5.27847	-4.14143	-9.09516	-9.34118	-7.09072	-5.99339	-5.75787	-9.15395	-7.58893	-13.9962	-12.5075	-14.4187	-11.6442	-11.896	-8.52564	-12.3199	-12.2011	-14.7911	-11.2287	-12.0786	-13.5391	-11.4376	-8.53105	-10.561	-7.7322	-10.4223	-5.50922	-9.22561	-9.89762	-11.1911	-11.0149	-10.9883	-8.0009	-10.4	-7.98021	-7.6288	-8.77691	-9.39102	-10.1298	-11.1175
315.5	500.5	11.1379	4.57952	-9.18613	-7.35413	-8.97342	-5.78584	-4.09773	-7.10123	-6.89773	-6.49119	-8.25935	-7.8354	-6.88594	-7.08926	-9.42032	-7.23815	-8.38017	-12.3612	-8.19752	-13.8917	-10.7402	-8.02628	-8.98655	-7.73864	-11.4188	-11.5212	-12.04	-13.3029	-15.6407	-15.9834	-9.05508	-12.05	-9.13394	-12.6745	-6.96873	-8.06809	-10.8186	-12.3361	-11.5865	-10.7891	-9.17054	-11.2736	-7.31738	-7.78645	-9.65424	-10.7315	-13.326	-10.4365
316.5	500.5	11.138	4.57952	-6.87673	-5.97664	-8.49132	-4.90767	-5.31082	-6.40067	-7.1863	-10.0203	-9.41483	-6.1339	-6.52636	-8.00839	-11.2585	-7.60769	-7.09213	-11.8685	-6.4519	-11.6377	-8.71796	-6.29483	-10.826	-6.49429	-10.2811	-9.46687	-12.3	-14.3356	-13.1062	-14.3901	-10.919	-13.2239	-11.2576	-16.3433	-10.6932	-8.36223	-10.3757	-11.4955	-10.2822	-12.5083	-9.15254	-12.3044	-7.73862	-9.10043	-10.0863	-10.1989	-14.5902	-8.99263
317.5	500.5	11.1381	4.57952	-5.77559	-5.67698	-8.30642	-6.79188	-7.00468	-6.92785	-6.6158	-10.1876	-7.75469	-5.71722	-4.99107	-6.00311	-10.5866	-8.04038	-5.72628	-10.7445	-8.38809	-11.479	-7.99933	-6.28736	-10.4653	-8.30092	-10.1805	-8.69454	-12.5309	-15.1156	-9.35324	-10.0186	-10.0671	-13.7522	-12.0483	-11.8294	-9.77567	-10.3468	-7.78193	-11.4432	-9.74162	-12.4985	-9.82858	-10.9852	-8.89003	-11.7199	-11.2018	-10.1465	-14.8622	-10.8987
314.5	501.5	11.1378	4.57943	-14.2731	-9.33256	-8.91549	-6.92061	-7.44858	-6.81861	-5.73852	-4.12902	-8.25712	-9.10444	-6.76351	-6.5858	-5.87631	-9.80467	-7.89942	-13.8335	-9.69928	-13.618	-9.97484	-10.4353	-7.13238	-12.826	-9.81203	-14.5533	-13.2203	-12.1288	-9.98086	-7.77853	-10.1004	-13.409	-10.4858	-9.00183	-5.96213	-9.35217	-11.7883	-10.2933	-9.46255	-11.8699	-10.3367	-11.5917	-11.5487	-10.4289	-14.8887	-9.32293	-6.90056	-8.18358
315.5	501.5	11.1379	4.57943	-10.3896	-9.27703	-8.89543	-6.31618	-5.33517	-6.8068	-8.15422	-5.33074	-7.405	-8.72627	-6.18606	-8.62975	-8.04515	-8.87258	-10.4532	-9.70167	-7.17428	-13.6892	-12.8147	-8.0999	-5.83597	-9.70841	-9.78823	-10.0325	-14.8144	-15.1741	-10.0784	-10.2254	-10.1239	-13.4638	-10.6204	-10.9696	-8.09633	-7.92097	-15.1435	-12.5076	-12.0578	-14.5951	-12.2191	-10.4421	-10.4886	-11.4701	-13.6037	-10.7211	-7.44449	-8.04756
316.5	501.5	11.138	4.57943	-7.36522	-6.41543	-8.22158	-4.84801	-6.81306	-5.28472	-7.77557	-6.68191	-7.53704	-7.8113	-6.13946	-8.41576	-11.0543	-9.80477	-7.63205	-8.73707	-5.07898	-10.9362	-9.81957	-6.28817	-8.02617	-7.37183	-8.86819	-7.28992	-14.4157	-15.5034	-12.2029	-12.3174	-9.30117	-14.7829	-12.1546	-14.5204	-12.0684	-8.30294	-12.1526	-12.9463	-12.0875	-13.8963	-12.6405	-10.3688	-11.0937	-11.5317	-10.881	-10.0914	-12.9524	-8.42787
317.5	501.5	11.138	4.57943	-5.66449	-5.15488	-8.2872	-5.55581	-8.66705	-6.26089	-7.15878	-7.45257	-7.43218	-6.11515	-4.90248	-5.94768	-8.96715	-7.84424	-4.36318	-9.49832	-7.17828	-8.95327	-8.37442	-7.62626	-8.31934	-7.55896	-8.26697	-7.16252	-13.0113	-12.8375	-10.4422	-9.80359	-7.60657	-13.0472	-11.6655	-14.3527	-13.1496	-10.8313	-9.08511	-12.2237	-10.5407	-10.7501	-11.9161	-10.3439	-10.9369	-12.1931	-9.55512	-9.93443	-12.9274	-9.88727
318.5	501.5	11.1381	4.57943	-6.30032	-5.99371	-9.01765	-7.96748	-8.09094	-7.45129	-5.91965	-6.5434	-8.9999	-5.50832	-5.08514	-4.21017	-7.34326	-6.12451	-5.22065	-10.4335	-9.7006	-7.3513	-8.44253	-10.2801	-9.53425	-10.8063	-8.69198	-7.56758	-11.3519	-10.4812	-8.24661	-7.881	-8.35789	-10.7236	-10.0456	-11.9245	-12.278	-12.4571	-7.91522	-11.4975	-9.84051	-9.9195	-12.3065	-9.03895	-10.3836	-10.9412	-10.1773	-10.8241	-13.0303	-11.8899
314.5	502.5	11.1378	4.57934	-11.9174	-11.0204	-7.30475	-7.40217	-8.23306	-7.7446	-5.8049	-6.08357	-6.70159	-7.55469	-6.52454	-8.37464	-6.3672	-8.62423	-6.77225	-10.0721	-6.64435	-10.1795	-7.5044	-9.31835	-9.22504	-12.4728	-7.72816	-15.9176	-11.2144	-13.7936	-8.99877	-4.89812	-8.81522	-13.1419	-13.0697	-7.81077	-5.90427	-8.44808	-14.2599	-10.9033	-11.9045	-11.0026	-14.8577	-14.0639	-10.9945	-12.1379	-13.6588	-8.27553	-6.15225	-8.58467
315.5	502.5	11.1379	4.57934	-11.6625	-9.22143	-7.03938	-6.4159	-8.87924	-7.33155	-9.82983	-5.41515	-7.01361	-7.58522	-5.69798	-9.34869	-7.44504	-10.2082	-6.91067	-7.35575	-5.57361	-12.0257	-8.94799	-9.39602	-6.01117	-11.0546	-8.30325	-10.0819	-14.9976	-17.3928	-8.77337	-5.21843	-10.56	-12.3198	-12.4273	-9.92808	-8.46083	-8.05103	-19.5907	-11.8837	-13.2243	-15.8087	-17.1153	-13.3366	-13.4153	-16.3235	-13.4459	-12.2632	-6.82641	-7.46873
316.5	502.5	11.138	4.57934	-9.36293	-7.06306	-7.11219	-5.18949	-10.9339	-6.31348	-9.76556	-4.88377	-7.48732	-7.58993	-6.57525	-7.98162	-10.9298	-11.1913	-6.11573	-6.05426	-4.45788	-10.6988	-8.28663	-7.88524	-5.32798	-8.06999	-7.83936	-5.28928	-16.7815	-16.8784	-9.09992	-7.04313	-11.3626	-13.946	-10.7709	-11.3627	-12.7794	-10.2042	-13.2498	-14.1126	-12.943	-17.3225	-15.1539	-12.1335	-12.0909	-16.7076	-11.9213	-10.8424	-11.0858	-7.49005
317.5	502.5	11.138	4.57934	-8.08834	-5.0997	-7.96655	-5.17742	-13.4364	-5.33481	-8.12755	-6.52587	-6.93538	-6.21036	-6.65264	-6.81974	-8.62909	-9.31584	-4.5491	-5.99626	-5.62806	-6.40471	-7.18936	-10.4014	-5.18234	-7.15579	-6.66255	-5.60215	-13.2224	-12.3771	-8.66252	-7.69462	-7.47346	-13.3206	-10.8271	-11.3434	-13.9985	-14.9221	-9.84142	-13.0331	-11.1961	-9.40085	-10.1949	-10.9556	-10.3162	-12.223	-8.94986	-8.2657	-10.2059	-8.67891
318.5	502.5	11.1381	4.57934	-7.97718	-6.02785	-11.3102	-6.01218	-12.1629	-5.05203	-5.63428	-7.04248	-7.86281	-4.5647	-7.18746	-5.96206	-7.63928	-7.25736	-5.23759	-8.59423	-7.79767	-5.15257	-7.25759	-17.6598	-6.73877	-9.63296	-7.18386	-9.23518	-10.8294	-8.37371	-7.79638	-7.62797	-6.55416	-10.4141	-10.2671	-13.4978	-11.0243	-15.3572	-8.47424	-11.9851	-11.8385	-7.16685	-9.30966	-10.2496	-10.0009	-10.0452	-10.3221	-8.9169	-10.5379	-10.7305
287.5	545.5	11.1353	4.57552	-6.98232	-8.14729	-9.12961	-8.11004	-6.52526	-9.27502	-12.028	-6.58247	-8.0063	-7.98691	-8.11724	-8.33365	-5.88122	-11.0265	-9.24757	-12.522	-9.31989	-8.3414	-6.22168	-6.58131	-6.78539	-7.06162	-9.84962	-11.103	-4.62057	-7.76441	-8.94052	-10.1998	-7.6667	-6.6171	-4.76402	-9.16013	-9.23309	-8.26594	-10.3542	-8.19581	-9.90979	-6.82845	-8.61418	-6.06054	-7.24458	-4.58329	-7.06552	-7.5656	-7.14733	-7.7997
288.5	545.5	11.1354	4.57552	-5.44978	-8.3364	-8.81294	-6.38931	-4.55813	-6.83856	-8.39897	-7.96017	-7.51154	-7.57827	-6.83878	-6.71533	-7.36368	-11.3606	-9.02639	-10.1558	-9.17932	-8.54649	-6.00956	-6.92951	-6.12838	-5.92091	-9.61716	-10.8327	-5.59731	-8.1812	-7.89685	-10.6048	-8.578	-7.76962	-5.5914	-10.0401	-10.6178	-8.05955	-10.893	-8.37277	-10.4203	-7.05255	-10.9639	-5.49681	-6.92885	-4.97054	-7.75663	-9.29537	-8.22458	-8.96384
289.5	545.5	11.1355	4.57551	-5.57807	-7.50444	-9.61172	-5.7174	-4.1849	-6.26521	-5.25332	-8.77091	-6.75085	-5.71095	-6.66991	-5.49277	-8.99896	-11.6659	-9.41056	-9.86156	-10.1134	-8.11652	-7.45309	-7.12682	-11.4048	-8.73595	-11.5177	-14.225	-8.12509	-7.85662	-9.2481	-11.169	-9.16275	-7.39203	-7.40031	-9.82492	-11.0433	-6.69773	-12.0846	-7.60583	-9.66843	-5.81574	-11.856	-9.4056	-6.88441	-7.85176	-7.50936	-8.66204	-11.5371	-9.91047
290.5	545.5	11.1356	4.57551	-6.36747	-8.08199	-9.50912	-5.76609	-5.06914	-5.48091	-3.9919	-8.96007	-5.16269	-3.53481	-6.7424	-5.55529	-10.2974	-11.8418	-10.7337	-9.5732	-10.6043	-6.94689	-9.3416	-8.93438	-13.7523	-11.7956	-12.0683	-14.537	-7.46273	-6.27392	-10.0647	-10.0969	-8.04274	-6.47806	-7.03809	-11.4691	-7.54475	-6.31875	-10.5625	-7.75681	-10.2244	-6.06894	-9.17255	-8.30813	-6.96189	-11.2334	-6.665	-4.95556	-12.1266	-8.17705
310.5	545.5	11.1374	4.57549	-4.78288	-3.46927	-3.92496	-8.18992	-5.87002	-5.09455	-3.03602	-4.52405	-6.24874	-7.13168	-5.72435	-8.10033	-7.17843	-6.79709	-6.385	-8.3892	-12.7868	-5.58497	-10.0376	-10.4142	-8.70305	-9.391	-8.88703	-8.97897	-5.83416	-7.85603	-5.03648	-8.47405	-4.23897	-6.8117	-7.91483	-8.36944	-4.87671	-10.031	-8.08628	-4.55055	-7.52636	-5.79589	-7.45312	-5.75771	-5.43287	-5.04795	-6.56391	-4.45166	-7.69285	-5.02359
311.5	545.5	11.1375	4.57549	-4.81271	-7.10529	-6.11839	-9.42879	-8.01749	-5.09938	-2.97039	-4.74308	-8.40719	-9.14328	-7.69156	-5.89027	-9.776	-5.82948	-7.98449	-7.06609	-11.7312	-5.20531	-11.7619	-7.94421	-7.92962	-8.32891	-9.89395	-6.79076	-5.88339	-7.24252	-5.37925	-8.17392	-4.00443	-7.04515	-8.00453	-8.30834	-5.26656	-8.49227	-8.30177	-3.20016	-6.75805	-7.80246	-8.60734	-5.64014	-4.51447	-4.38013	-6.62254	-4.81628	-7.71392	-5.49328
312.5	545.5	11.1376	4.57549	-3.36583	-9.35809	-8.86507	-8.81579	-6.79307	-5.71029	-2.50104	-6.76702	-9.04566	-8.58279	-11.5254	-5.09766	-8.67323	-5.27998	-7.1057	-5.41948	-10.6058	-4.42514	-9.51394	-5.73128	-8.24808	-5.7913	-7.275	-4.4681	-5.71795	-6.48245	-4.76794	-9.26044	-3.6567	-5.01201	-7.77927	-8.46508	-6.06179	-6.23495	-7.2743	-2.03383	-6.27792	-10.6302	-8.11054	-7.14771	-3.97887	-4.33064	-7.0169	-6.15194	-7.60432	-6.9083
313.5	545.5	11.1376	4.57549	-5.6312	-13.4873	-12.8559	-12.5636	-5.3941	-5.66022	-4.98991	-8.76187	-9.35123	-7.70101	-13.0182	-6.30008	-8.44538	-7.2119	-5.77196	-4.60059	-7.85512	-3.76951	-8.94421	-5.89183	-10.5827	-4.21146	-5.03673	-3.61113	-5.92599	-5.1109	-3.66825	-8.66618	-4.60665	-3.75927	-7.70473	-8.15157	-3.46596	-4.58384	-5.18602	-2.56351	-6.35637	-6.51197	-5.06083	-8.38061	-4.44015	-3.7805	-6.53628	-4.09763	-7.37664	-9.18746
314.5	545.5	11.1377	4.57549	-8.48233	-13.6116	-19.1233	-11.7903	-6.88439	-6.92481	-6.5831	-11.8087	-14.0617	-11.9858	-13.5995	-12.5315	-14.5482	-7.85329	-6.80637	-4.83876	-5.10837	-4.21307	-7.42898	-9.17281	-7.53582	-4.12334	-4.86008	-5.68619	-5.21398	-4.06274	-5.04629	-7.57743	-4.8485	-4.27605	-7.93364	-5.90942	-2.77081	-4.83679	-4.1749	-3.17759	-7.71281	-4.94418	-4.17267	-8.01237	-5.69311	-4.34774	-5.89887	-4.2926	-7.48483	-12.3542
286.5	546.5	11.1352	4.57543	-8.9182	-6.69787	-12.4298	-8.88147	-7.58674	-8.41015	-11.0933	-5.90832	-8.5814	-7.11683	-6.96582	-8.87429	-4.82409	-8.55029	-12.3894	-12.5791	-7.62405	-7.2317	-6.13768	-6.58214	-10.6966	-11.9873	-12.4486	-10.6683	-5.14316	-6.67257	-8.68772	-8.04596	-7.30246	-11.6151	-5.90556	-6.57719	-6.63789	-7.01307	-11.3898	-6.30919	-9.72174	-6.5119	-8.03751	-7.7594	-9.34536	-4.32112	-9.087	-7.88829	-9.0958	-7.81509
287.5	546.5	11.1353	4.57543	-6.17679	-8.00355	-10.5599	-8.79051	-6.01534	-9.44037	-9.51553	-6.90889	-8.4868	-8.2626	-8.78797	-6.73779	-6.57003	-8.81895	-9.37545	-11.5464	-8.57694	-9.49761	-5.06941	-7.60406	-6.79238	-9.29615	-10.3288	-9.23391	-6.19236	-7.05364	-9.05519	-11.5514	-7.90104	-10.6366	-6.39067	-8.68979	-10.6259	-6.68015	-11.1646	-8.25508	-8.24064	-7.98931	-8.947	-3.82451	-10.4277	-6.39128	-8.46995	-9.44906	-7.52404	-7.32291
288.5	546.5	11.1354	4.57543	-4.86653	-8.53644	-9.4251	-9.27908	-4.0122	-6.64058	-7.19764	-8.22272	-8.36118	-9.00927	-7.37293	-5.25306	-8.40878	-10.8213	-7.67026	-10.87	-7.89377	-8.7787	-6.02391	-7.62708	-5.5547	-7.1263	-9.64047	-9.28808	-6.6187	-9.13261	-8.5432	-11.2903	-8.27107	-9.97036	-6.50546	-10.0342	-10.4228	-7.68394	-10.7088	-9.13685	-9.07275	-9.13966	-10.6323	-3.71343	-10.3205	-7.68932	-9.68546	-12.2625	-8.27924	-7.87529
289.5	546.5	11.1355	4.57543	-6.10048	-8.44518	-9.4124	-9.91436	-2.77752	-4.33789	-5.7878	-8.00275	-8.50177	-7.44831	-6.21841	-4.4736	-8.87863	-10.4522	-7.96554	-9.95833	-8.6038	-7.66326	-8.90344	-7.77247	-10.3844	-8.77391	-10.7161	-12.1651	-8.41736	-9.77368	-9.11214	-8.08034	-8.39237	-8.71123	-7.58031	-8.58471	-10.4614	-6.9776	-12.1101	-8.13607	-10.9542	-9.0096	-12.2879	-8.02855	-9.39554	-8.47152	-9.11323	-10.6027	-13.4475	-8.65572
290.5	546.5	11.1356	4.57542	-6.78903	-8.15044	-10.6086	-9.5936	-3.80309	-4.11452	-4.97313	-7.72416	-6.76861	-4.79075	-6.64981	-4.56199	-8.394	-10.8376	-9.34014	-9.29487	-10.7892	-7.37894	-10.143	-8.35089	-14.1488	-11.5345	-12.1352	-12.2966	-7.40799	-5.77477	-9.69392	-7.04689	-7.664	-7.0421	-8.44152	-10.0762	-7.8849	-7.25587	-9.4008	-7.20096	-12.9167	-10.5656	-9.67271	-8.28976	-9.48032	-10.1305	-7.43552	-4.68234	-10.5244	-9.09439
291.5	546.5	11.1357	4.57542	-6.79854	-8.66986	-10.6994	-9.79985	-4.86443	-4.31388	-6.29538	-7.7574	-5.44838	-4.63104	-6.89107	-4.96454	-7.79509	-10.4116	-10.3098	-11.7497	-9.80415	-9.25064	-11.3058	-10.348	-13.8082	-10.929	-11.1027	-9.36648	-5.14199	-3.70938	-11.6131	-8.51525	-7.32024	-7.46815	-6.38176	-10.2076	-3.80231	-10.075	-8.2193	-8.35181	-9.75838	-9.37071	-7.22965	-7.26588	-7.11197	-10.0049	-7.00029	-3.38143	-8.57282	-9.78773
310.5	546.5	11.1374	4.5754	-5.03256	-3.07481	-3.69707	-6.14553	-3.97105	-7.2503	-2.45253	-3.17176	-6.39685	-7.65159	-5.86341	-8.88758	-6.53809	-7.00975	-4.68277	-7.96063	-12.2514	-6.74954	-9.23623	-10.3496	-8.96157	-5.98245	-5.94649	-9.62486	-8.17167	-8.13258	-2.8812	-6.18705	-5.57254	-7.09104	-9.54859	-9.68418	-6.46733	-7.33963	-6.56437	-5.52496	-7.95998	-7.79346	-9.49116	-5.84425	-4.64965	-5.82478	-7.79747	-5.4582	-8.00274	-5.32984
311.5	546.5	11.1375	4.5754	-3.71002	-7.8339	-6.35277	-6.97086	-6.64179	-5.04559	-2.76742	-3.85582	-8.10903	-8.93206	-6.46429	-6.29476	-7.65629	-5.4113	-7.56505	-7.50811	-11.3453	-6.30894	-10.1342	-11.3506	-7.87214	-5.84242	-7.19982	-7.54514	-10.3726	-9.46841	-5.35534	-5.96531	-5.0923	-6.59018	-9.63282	-9.35931	-5.88535	-6.35287	-6.51999	-3.98237	-7.66987	-9.42857	-9.99005	-6.48309	-4.5994	-4.84277	-7.66897	-5.09862	-8.36961	-5.2366
312.5	546.5	11.1376	4.5754	-3.04831	-9.4708	-10.1996	-9.65034	-8.12743	-4.01608	-0.909686	-4.9214	-9.29638	-8.36199	-9.5968	-5.2898	-8.74341	-4.70475	-8.82863	-6.77592	-11.2504	-6.10375	-9.34309	-8.63606	-7.4825	-6.63115	-8.66173	-5.76052	-11.1263	-8.13961	-6.74807	-7.14896	-5.22313	-5.25974	-8.13195	-9.01634	-6.49078	-5.12222	-6.37538	-3.36691	-6.74786	-9.37195	-8.5052	-7.08856	-5.85709	-4.61749	-7.53271	-4.86131	-8.59903	-6.19832
313.5	546.5	11.1376	4.5754	-5.3694	-11.1352	-17.3872	-13.9468	-5.88837	-6.53719	-4.18789	-7.65501	-8.51292	-11.983	-11.8306	-7.49111	-9.67015	-6.01884	-6.98558	-5.1466	-7.80086	-6.18823	-9.28939	-8.71039	-9.22519	-5.80151	-6.08035	-4.20295	-10.8147	-6.80168	-5.11803	-8.28016	-5.85912	-3.00917	-6.15835	-9.04367	-5.94609	-4.95035	-6.0902	-3.93555	-8.56573	-8.1562	-6.2855	-5.95771	-7.53364	-4.48953	-6.91112	-4.29223	-8.79903	-8.08691
314.5	546.5	11.1377	4.5754	-6.96392	-11.0119	-16.7741	-12.4849	-5.06064	-8.00374	-6.66411	-14.1273	-12.3702	-15.7342	-16.1971	-13.5598	-13.1331	-6.25202	-7.19959	-4.34243	-4.5029	-7.28699	-7.38714	-9.62258	-8.19954	-5.10624	-4.59175	-4.18828	-7.81099	-5.69233	-4.24388	-7.74703	-6.01528	-3.56561	-4.66063	-9.45066	-4.79689	-5.00787	-5.5592	-4.93196	-8.73124	-6.67753	-4.67207	-4.03575	-8.72643	-5.08627	-5.49695	-4.37775	-9.10111	-11.1629
286.5	547.5	11.1352	4.57534	-9.45264	-8.00251	-14.175	-8.12473	-8.53962	-8.51187	-11.6278	-7.34567	-10.0289	-6.92912	-7.83785	-8.3949	-6.57751	-9.34721	-12.8324	-8.92639	-6.92806	-6.42383	-6.60551	-7.41182	-10.0499	-10.2172	-11.2982	-10.2085	-5.34328	-5.55993	-7.50197	-6.29255	-9.27568	-8.20693	-7.30663	-7.28401	-7.41568	-6.4052	-8.96021	-7.25832	-6.97154	-7.39702	-9.03756	-7.25505	-7.3729	-5.19958	-8.51577	-10.3614	-7.98333	-8.61716
287.5	547.5	11.1353	4.57534	-7.88045	-7.70369	-11.5966	-7.44256	-7.29348	-11.1317	-9.83751	-7.4043	-9.34809	-6.7846	-8.13502	-7.6334	-9.03637	-9.03877	-9.54638	-9.06162	-6.59511	-10.9644	-7.07674	-8.03501	-8.89726	-9.27673	-9.02322	-8.38025	-8.00375	-8.12125	-9.4313	-9.59122	-8.99121	-10.2906	-9.0764	-8.13348	-10.8796	-7.16654	-10.477	-10.123	-6.35373	-9.36538	-9.57981	-4.70507	-10.0987	-8.51209	-9.06756	-11.8136	-7.2071	-7.72877
288.5	547.5	11.1354	4.57534	-6.72993	-7.36275	-10.2734	-8.32349	-5.39029	-8.54054	-8.28763	-7.57422	-9.05554	-7.44215	-8.33306	-6.29726	-10.4931	-10.6943	-5.94824	-9.58814	-5.47434	-12.644	-8.06532	-5.86929	-6.9693	-7.17018	-7.2842	-6.59548	-8.01472	-11.7876	-8.80969	-10.6096	-8.41983	-11.1364	-9.27757	-8.52245	-10.8114	-9.07177	-11.7618	-9.98822	-8.79435	-10.4063	-9.33548	-4.72292	-12.7738	-10.619	-11.3696	-11.6702	-7.31399	-7.65673
289.5	547.5	11.1355	4.57534	-6.89532	-6.71957	-9.82611	-10.4426	-3.96924	-5.8512	-7.93749	-7.5872	-8.33969	-6.76034	-7.61535	-5.53214	-9.53584	-9.87294	-6.5811	-7.65579	-5.67437	-8.11289	-10.2083	-4.50867	-10.1142	-7.98398	-7.46307	-7.76119	-8.18788	-11.6724	-6.87496	-6.81408	-10.1119	-10.4601	-10.0861	-6.64013	-9.99179	-8.65773	-11.6582	-10.4764	-12.8725	-10.8231	-10.3688	-8.16493	-13.0138	-9.50661	-9.32863	-10.3262	-9.93563	-7.96137
290.5	547.5	11.1356	4.57533	-6.54403	-6.66651	-9.87891	-11.3893	-4.78333	-5.58711	-7.87882	-7.97542	-7.27295	-6.05859	-7.64735	-5.40133	-7.50597	-8.53213	-8.78616	-7.32999	-8.4868	-7.31132	-10.6954	-5.69102	-14.9098	-11.6442	-10.4639	-9.34453	-8.63452	-7.19919	-6.26691	-5.22755	-9.55598	-8.86136	-10.8284	-6.84195	-9.19812	-10.0247	-10.2183	-8.44867	-12.2738	-12.7423	-9.79883	-8.63856	-11.8548	-8.82723	-8.09263	-5.87732	-10.0269	-9.10329
291.5	547.5	11.1357	4.57533	-6.16152	-6.54253	-9.18116	-10.4466	-5.81045	-6.35414	-8.83935	-8.39394	-6.36013	-6.03791	-7.76793	-6.00885	-6.23802	-6.31404	-10.0327	-12.3677	-12.616	-10.0136	-12.4282	-11.1296	-12.7355	-14.4805	-12.1751	-10.4972	-7.65194	-6.05516	-7.67666	-6.93725	-9.8236	-8.33078	-9.60031	-7.98316	-5.99603	-6.98507	-11.0495	-8.14129	-8.60973	-10.8318	-8.78941	-6.29113	-8.86932	-8.4445	-8.46706	-4.21367	-8.96831	-10.7128
310.5	547.5	11.1374	4.57531	-5.22233	-2.92652	-6.1597	-5.32386	-3.71859	-8.1112	-3.64397	-2.40728	-8.39407	-6.71581	-6.25302	-10.0299	-5.89825	-4.77202	-4.8445	-6.29165	-10.3682	-8.8701	-7.80391	-8.42461	-9.11283	-6.08039	-5.07455	-13.5754	-9.04612	-6.42269	-3.31285	-4.46169	-5.86037	-9.07496	-6.83259	-10.6971	-10.1759	-6.06615	-6.61419	-10.034	-9.38646	-7.059	-7.10068	-7.45604	-5.43246	-8.0268	-9.47178	-6.84441	-9.3757	-7.86732
311.5	547.5	11.1375	4.57531	-3.85208	-8.66464	-8.17923	-7.14413	-4.57884	-4.53815	-2.67829	-4.59382	-8.74753	-8.21215	-5.91618	-6.39887	-6.69034	-3.84556	-6.94802	-6.82817	-9.44138	-9.88076	-8.52474	-10.9407	-8.18225	-6.32173	-6.91371	-8.6235	-10.5759	-7.28745	-5.86503	-4.80263	-5.6617	-7.80803	-7.00079	-9.89907	-9.85219	-5.51556	-6.37567	-7.23208	-9.33482	-6.97469	-7.22898	-7.92668	-6.28462	-6.33688	-9.15786	-5.61872	-9.53092	-8.34876
312.5	547.5	11.1376	4.57531	-4.66658	-10.2704	-11.2905	-10.6673	-4.91227	-2.83771	-0.555714	-5.10573	-10.723	-7.56286	-8.82924	-5.83109	-8.99721	-4.27456	-8.15132	-6.8988	-10.254	-10.1805	-9.05555	-10.8469	-6.49018	-7.09012	-8.68865	-6.69775	-11.7905	-7.47958	-7.92276	-6.45417	-6.21496	-5.30778	-6.45842	-9.54873	-9.53144	-5.29371	-6.62399	-6.0282	-7.92146	-6.92886	-6.4989	-7.07956	-8.59183	-5.0702	-8.44583	-4.72004	-9.90099	-8.99196
313.5	547.5	11.1376	4.57531	-6.23273	-8.3048	-13.7609	-10.9853	-6.24936	-6.31636	-3.68288	-7.81631	-11.6798	-12.547	-10.2082	-9.06901	-10.9486	-5.22615	-8.31868	-5.44529	-8.21682	-9.06278	-8.98039	-10.3267	-8.52853	-7.1529	-6.50257	-5.68898	-10.813	-6.324	-6.41325	-9.09227	-8.20306	-3.22688	-4.41695	-9.65471	-9.53939	-5.59392	-7.29497	-5.84544	-8.29793	-7.63801	-4.71432	-4.78315	-11.8042	-3.90232	-7.03738	-4.62833	-11.7161	-9.40912
314.5	547.5	11.1377	4.57531	-6.53721	-8.615	-12.6966	-11.1405	-5.16013	-9.32142	-6.93736	-13.3079	-13.6	-13.3366	-17.3462	-11.9845	-10.8258	-6.45659	-8.65605	-4.17202	-5.45482	-8.71178	-6.33311	-9.34524	-9.80249	-6.41096	-5.17596	-5.5383	-7.98555	-4.45022	-5.13909	-8.78896	-8.40211	-3.19891	-3.14008	-11.2434	-6.90484	-5.25581	-7.27779	-8.96866	-8.78132	-8.34119	-4.31443	-2.87705	-11.1162	-4.9439	-6.00722	-5.7386	-11.9807	-10.6832
290.5	548.5	11.1356	4.57524	-7.13374	-6.15345	-7.39206	-9.85906	-7.47854	-9.90081	-7.86233	-6.89362	-8.26117	-5.67789	-7.51794	-7.62726	-8.42331	-9.56267	-9.61362	-6.22246	-6.48124	-5.57582	-10.0731	-4.85587	-12.8147	-10.4987	-7.98192	-7.83868	-10.1148	-9.18468	-3.31531	-5.02577	-12.8892	-9.24328	-10.5111	-5.42956	-10.0462	-8.61107	-11.3137	-10.3487	-10.8938	-10.467	-8.96572	-8.62193	-10.0344	-8.26347	-10.1408	-7.89032	-10.3525	-8.06801
291.5	548.5	11.1357	4.57524	-6.98064	-5.8457	-7.07525	-9.41313	-7.94499	-10.69	-6.28173	-7.58427	-6.87686	-5.73019	-6.67762	-8.34821	-7.23261	-6.92569	-11.8168	-12.2721	-13.0006	-8.01719	-12.2343	-11.5711	-12.8273	-13.4916	-10.4105	-11.1539	-11.0049	-8.43813	-4.75574	-6.03936	-11.5613	-10.3417	-11.6344	-5.31359	-9.43071	-6.39194	-12.9985	-9.54966	-9.33585	-10.0182	-9.42202	-7.20121	-10.2414	-7.4768	-11.6342	-7.25541	-10.3072	-11.6685
310.5	548.5	11.1374	4.57522	-5.36102	-2.91337	-9.1052	-5.44535	-5.29545	-6.47302	-4.87964	-4.35362	-11.9916	-6.21477	-7.40728	-6.9099	-5.15757	-5.25356	-6.1622	-5.64519	-9.27501	-9.43732	-8.38527	-6.91048	-11.4581	-8.68799	-6.84867	-13.5552	-9.28219	-5.36551	-7.04287	-4.6011	-7.79732	-12.363	-7.51071	-11.8648	-9.79951	-5.45999	-8.62563	-12.3225	-10.045	-6.20277	-6.71223	-8.16937	-7.29939	-10.3469	-13.0155	-7.89044	-8.29931	-11.6139
311.5	548.5	11.1375	4.57522	-3.56371	-7.42085	-11.1524	-7.52647	-4.45821	-4.40343	-2.4534	-7.60719	-10.7262	-8.71286	-6.93009	-6.2665	-6.99628	-4.14973	-7.70807	-6.92865	-9.53822	-10.9439	-9.68316	-8.47105	-11.7424	-9.70897	-8.26922	-10.1167	-9.81885	-5.47163	-8.86395	-5.23247	-7.58601	-9.05336	-6.78996	-11.2158	-10.1448	-5.26372	-7.70644	-12.7014	-9.28898	-5.58035	-6.00547	-6.6353	-8.66687	-10.1909	-12.0429	-6.76294	-8.14255	-10.4761
312.5	548.5	11.1376	4.57522	-4.91082	-9.55936	-12.3545	-10.6004	-3.70716	-2.76727	-0.837151	-8.38055	-13.605	-8.97796	-10.2499	-7.14006	-10.3586	-5.3101	-6.81887	-6.87805	-10.7147	-11.5729	-10.354	-9.30647	-8.55641	-9.70846	-7.869	-8.10972	-9.38433	-5.92084	-7.80484	-7.32707	-7.69325	-6.24874	-6.66494	-9.97182	-12.3401	-5.93036	-8.02169	-11.1492	-8.5288	-5.68138	-5.86211	-5.33754	-10.2191	-7.41877	-11.298	-5.20362	-7.5162	-9.47935
313.5	548.5	11.1376	4.57522	-7.23064	-7.56963	-10.2814	-10.5673	-6.20737	-4.54531	-3.96396	-10.6558	-13.4516	-12.4726	-10.1182	-9.5088	-11.1417	-5.78552	-7.58218	-5.11427	-8.71378	-10.2952	-9.3705	-8.86745	-8.19271	-8.07126	-5.41602	-6.8389	-8.14346	-5.44337	-7.3296	-10.8389	-7.63227	-4.31916	-5.673	-9.73404	-11.258	-6.0296	-8.62504	-9.96228	-8.57182	-7.02893	-5.26466	-4.36255	-11.5075	-4.72143	-8.76105	-5.8852	-7.50705	-8.90751
314.5	548.5	11.1377	4.57522	-7.9835	-8.09083	-10.4097	-9.03641	-7.8218	-9.1793	-8.01734	-10.5114	-12.9838	-10.0453	-15.4347	-10.2133	-9.66016	-7.31065	-8.66773	-4.5175	-6.62797	-8.52936	-5.83472	-7.83633	-9.50964	-6.06508	-4.78316	-6.30977	-7.09498	-4.27945	-7.63579	-10.4601	-7.29711	-4.17781	-4.76664	-10.1601	-7.19472	-5.86708	-9.04996	-9.45915	-6.37454	-8.32105	-5.59625	-2.81221	-9.55378	-4.63778	-6.78177	-7.29545	-8.08788	-9.40996
301.5	687.5	11.1364	4.56279	-8.37173	-4.26635	-7.94774	-7.55079	-8.74679	-9.41077	-9.63862	-7.94562	-1.42196	-5.94406	-0.0792956	-5.56627	-5.93665	-11.1862	-7.83705	-6.78312	-9.93937	-6.73674	-8.63053	-10.7968	-9.771	-9.94977	-8.34348	-12.8251	-16.4111	-12.1755	-7.18841	-8.77505	-13.1367	-10.3773	-11.5964	-13.1945	-12.3485	-6.95522	-15.5394	-12.5381	-9.98219	-7.29036	-16.3961	-12.2784	-9.32363	-11.7781	-10.5716	-7.27901	-5.49311	-5.35976
300.5	688.5	11.1363	4.5627	-11.4044	-5.17212	-6.68204	-8.9665	-9.31164	-12.0257	-10.8654	-10.6043	-3.88991	-6.61206	-4.05545	-7.73652	-4.09197	-10.656	-5.04724	-7.51747	-8.47144	-5.17687	-8.77832	-7.39945	-9.27745	-10.9899	-5.63631	-10.0966	-9.7036	-10.6261	-5.55024	-7.37114	-10.1125	-9.64773	-10.8467	-11.1562	-9.29551	-3.74689	-12.2717	-9.46772	-10.3893	-9.8942	-10.0415	-11.0443	-8.74322	-11.3231	-8.50111	-7.30183	-7.01644	-7.69238
301.5	688.5	11.1364	4.5627	-8.8508	-3.44359	-6.81992	-9.07314	-11.0469	-9.22007	-8.57408	-7.87156	-1.96468	-5.28209	-2.26008	-5.70957	-4.71066	-9.65753	-6.16563	-8.20762	-8.61903	-8.05068	-10.9783	-11.0742	-8.99012	-10.6063	-7.29112	-14.763	-14.4915	-12.7915	-5.66557	-7.38445	-10.8527	-9.2377	-11.9196	-11.2275	-11.151	-3.99294	-12.8202	-11.3958	-13.8998	-9.15638	-10.7879	-10.0744	-8.88488	-14.6235	-8.69585	-7.60935	-8.04881	-6.46067
302.5	688.5	11.1365	4.5627	-5.62002	-4.1526	-4.24692	-4.68823	-11.5212	-6.54733	-7.16227	-5.36251	-3.61426	-4.59992	-1.49881	-6.49686	-5.08137	-8.71751	-9.68478	-9.89971	-8.68332	-9.74643	-10.2428	-19.5575	-10.3423	-11.3145	-11.8991	-14.5233	-12.9578	-10.5457	-7.24248	-8.91435	-12.1917	-10.1386	-13.9461	-11.7887	-9.57588	-6.02428	-12.1186	-11.845	-16.6448	-7.85902	-9.59823	-11.055	-8.4264	-12.7217	-10.0098	-9.47578	-9.69067	-7.47047
299.5	689.5	11.1363	4.56261	-13.4192	-8.35638	-7.15787	-8.92699	-11.2537	-12.4782	-9.88752	-10.0139	-10.3517	-9.15901	-5.0502	-8.17128	-6.72846	-11.5682	-6.959	-5.99111	-9.12687	-2.3352	-9.80284	-4.83611	-10.7248	-8.97341	-5.92825	-6.75189	-7.91368	-6.44349	-5.80734	-8.09834	-6.88676	-10.7902	-8.73931	-7.96119	-3.89902	-3.06974	-9.58873	-9.18318	-9.63889	-7.73444	-5.29337	-9.47485	-7.21003	-10.2445	-12.2405	-8.67827	-9.32321	-8.61624
300.5	689.5	11.1363	4.56261	-12.4232	-5.70339	-7.56816	-8.80446	-10.1627	-12.6601	-10.0277	-10.2025	-5.32416	-5.94744	-6.19039	-6.99801	-4.87756	-10.4362	-6.22355	-6.55625	-10.9197	-5.67844	-8.37	-5.69936	-9.98557	-9.48715	-5.31702	-10.1462	-8.30799	-6.62337	-4.81817	-10.1392	-9.00235	-8.91044	-7.88017	-7.66919	-7.78704	-3.6358	-10.2626	-7.63863	-9.60516	-7.60657	-5.27385	-10.5699	-7.40483	-11.9601	-8.82165	-7.91015	-8.47318	-9.08178
301.5	689.5	11.1364	4.56261	-11.4301	-5.03614	-7.09916	-9.51021	-10.7541	-9.52745	-8.22082	-8.34154	-3.56976	-4.50103	-5.86454	-7.33429	-4.56356	-9.32338	-7.44766	-8.14421	-8.57463	-9.16961	-8.15704	-9.47926	-10.3733	-10.6592	-7.20872	-13.4569	-11.3833	-7.85574	-4.52262	-9.86053	-8.74411	-8.02601	-9.54097	-7.75926	-8.84848	-5.55541	-10.6125	-7.6192	-13.3571	-7.15914	-6.87606	-9.33124	-8.69173	-11.7049	-7.23082	-8.0718	-8.35023	-7.94234
302.5	689.5	11.1365	4.56261	-7.33886	-6.4424	-4.16136	-6.54917	-9.03918	-7.59242	-6.92364	-4.81179	-4.0853	-3.49484	-4.36702	-7.56882	-5.63472	-8.58933	-10.2844	-11.1168	-7.95223	-9.98407	-8.61579	-15.9871	-11.5748	-12.8637	-10.7922	-12.0246	-12.6515	-8.87316	-5.23814	-9.25635	-8.03262	-8.8663	-12.6008	-8.81704	-8.38463	-9.66022	-11.0805	-9.24276	-17.2811	-6.87168	-6.96524	-10.1584	-9.39922	-9.1955	-9.35492	-8.9745	-8.43046	-9.32832
303.5	689.5	11.1366	4.56261	-5.18948	-5.95192	-3.1073	-6.46587	-7.33563	-5.19589	-7.20731	-2.09887	-3.89581	-3.21461	-3.66819	-6.30443	-5.747	-6.70285	-11.8764	-14.196	-7.1324	-12.4901	-8.7099	-14.826	-12.4181	-13.0346	-14.0334	-13.9776	-10.2573	-7.97713	-7.06851	-10.0913	-8.89615	-9.65032	-14.1801	-10.0432	-9.96896	-14.2509	-12.6377	-10.8802	-13.1061	-8.20947	-8.51427	-10.2982	-9.68111	-9.43809	-12.0361	-9.29316	-10.6131	-9.07197
300.5	690.5	11.1363	4.56252	-11.9654	-6.43255	-9.78669	-8.42552	-9.4981	-12.6733	-9.75386	-9.55016	-7.56349	-6.5085	-7.22756	-9.81797	-6.068	-11.4471	-6.66899	-6.40724	-10.5912	-7.55157	-8.0253	-5.20976	-12.4646	-7.10098	-3.63801	-9.90632	-5.76533	-4.50699	-5.13533	-10.7009	-8.96301	-5.82801	-6.27119	-7.04393	-7.2282	-6.47703	-9.58099	-5.82106	-9.66148	-5.5129	-3.51963	-7.22502	-7.49514	-8.6197	-6.38982	-6.4811	-8.19923	-8.95553
301.5	690.5	11.1364	4.56252	-10.1758	-7.16673	-8.46087	-8.93118	-10.0284	-9.25728	-8.24485	-8.35913	-6.63926	-4.72693	-8.96534	-9.87711	-6.0026	-11.7651	-8.96594	-7.20683	-8.45802	-8.62295	-7.26988	-9.09399	-12.6108	-9.68809	-5.73168	-11.287	-7.78759	-4.44422	-4.02156	-10.5878	-7.88457	-6.72527	-7.74561	-6.77129	-8.47628	-10.1358	-10.1438	-6.1383	-11.0983	-5.41963	-5.2435	-6.99767	-9.21358	-7.31491	-5.92703	-5.57275	-8.38486	-8.63837
302.5	690.5	11.1365	4.56252	-6.72327	-10.4379	-5.63904	-8.60653	-7.43759	-7.28298	-6.63884	-5.3203	-5.93368	-3.59913	-7.44518	-7.89541	-7.9789	-9.7561	-9.93477	-9.67113	-7.29958	-8.36266	-7.65799	-14.1063	-10.8816	-12.0097	-9.15855	-10.1608	-12.2341	-5.87183	-4.40149	-10.5759	-6.92604	-8.20017	-11.4773	-7.65943	-8.42521	-14.6666	-10.1975	-7.04643	-11.446	-5.80445	-6.35628	-8.3616	-12.0972	-5.99782	-8.4854	-6.12814	-9.66658	-10.4628
303.5	690.5	11.1366	4.56252	-5.96831	-9.9795	-3.35477	-7.44383	-6.4729	-5.59225	-7.05035	-3.2149	-4.25554	-3.24426	-6.50453	-6.09336	-7.73944	-7.14187	-8.81156	-14.4396	-6.77853	-10.6106	-7.79369	-14.5903	-10.1621	-11.8448	-12.5806	-12.3321	-11.9586	-7.75219	-6.84709	-10.1976	-8.29635	-9.89082	-14.9494	-9.00051	-9.95023	-14.2737	-10.3528	-8.96125	-11.2906	-8.16648	-8.66521	-9.53691	-11.8443	-8.03058	-11.76	-7.60201	-12.1861	-9.14321
304.5	690.5	11.1367	4.56251	-7.99542	-6.57386	-3.94897	-6.23338	-6.67381	-5.51176	-8.83155	-3.40381	-3.82029	-3.91578	-7.27382	-5.69285	-5.80558	-7.46372	-7.69227	-16.5853	-6.56313	-13.5687	-8.4194	-12.5221	-9.06924	-10.3991	-13.7342	-12.431	-12.408	-9.52395	-11.2607	-9.50701	-11.9999	-11.8574	-17.0793	-10.9905	-11.5514	-10.8211	-11.1238	-10.7424	-12.793	-9.93618	-13.2969	-11.0445	-10.5216	-12.7108	-9.93644	-10.6357	-8.30362	-8.79778
300.5	691.5	11.1363	4.56243	-8.4002	-8.20372	-10.0666	-7.88978	-9.93915	-13.9382	-10.1709	-10.2735	-9.3057	-7.67722	-7.04882	-11.7288	-9.22684	-9.61707	-6.86284	-6.77456	-9.29378	-8.31723	-8.98043	-6.74856	-13.4129	-6.63792	-2.84442	-13.2353	-4.90472	-4.2879	-5.95355	-8.09798	-8.32655	-6.14474	-6.26488	-10.0158	-5.61757	-11.7079	-9.26917	-5.77449	-9.57739	-4.97233	-4.36074	-4.937	-8.58228	-5.39614	-4.68284	-5.37916	-8.17996	-8.85859
301.5	691.5	11.1364	4.56243	-7.00386	-9.09506	-11.3238	-8.31168	-10.8413	-10.3829	-9.6075	-9.1171	-8.98768	-6.10257	-10.197	-11.0713	-8.77493	-13.3627	-8.57822	-7.84108	-8.04886	-7.62837	-9.22052	-9.8054	-12.9438	-9.01455	-4.94149	-10.7709	-6.70608	-4.17123	-5.11638	-8.08792	-8.20073	-7.17437	-6.43065	-8.94696	-6.16843	-14.5683	-8.57044	-6.84082	-8.79981	-5.20104	-6.24856	-5.29441	-8.50052	-4.36286	-5.65801	-4.05188	-10.4996	-9.30574
302.5	691.5	11.1365	4.56243	-5.41233	-11.98	-9.31736	-9.97377	-7.77414	-8.49764	-7.96501	-7.62438	-8.16631	-5.58552	-11.4915	-10.1626	-12.2847	-12.3315	-7.73195	-10.158	-6.67455	-7.56998	-7.80907	-11.38	-9.98375	-11.4956	-9.20289	-9.07007	-11.4259	-5.11592	-5.55384	-8.81155	-8.09111	-7.85434	-7.83198	-7.61181	-7.93414	-15.1643	-7.83012	-8.20098	-8.00684	-5.6074	-7.90617	-7.04087	-8.49893	-4.99175	-8.9299	-4.26802	-10.3025	-11.1491
303.5	691.5	11.1366	4.56243	-5.82343	-13.3756	-5.24747	-9.72115	-6.58287	-8.2034	-8.05373	-6.17432	-6.60441	-5.74428	-8.65805	-8.28416	-9.52101	-8.81943	-6.45575	-12.2875	-5.46547	-9.81527	-6.78452	-11.1025	-8.57304	-12.8867	-10.9574	-10.5142	-11.6839	-6.79644	-8.30689	-9.0057	-9.24002	-9.08291	-8.77047	-7.22995	-9.45129	-10.5329	-7.78435	-9.11505	-8.51938	-7.95662	-10.2246	-8.50378	-9.34194	-8.59411	-11.8424	-5.93711	-8.04991	-9.98662
301.5	692.5	11.1364	4.56234	-5.95993	-9.83198	-12.5778	-8.22588	-10.3065	-9.86491	-10.8201	-9.90756	-9.83746	-9.23688	-10.0956	-10.466	-11.9635	-10.626	-7.11351	-9.08563	-8.41905	-5.87262	-11.61	-10.5588	-13.154	-12.5955	-7.36893	-8.94419	-8.19526	-7.1813	-7.73934	-7.00661	-8.13601	-7.69421	-5.86604	-10.3719	-4.17604	-11.518	-6.09706	-7.7725	-7.85821	-5.62088	-9.70614	-5.9267	-8.3248	-3.34568	-8.16774	-4.19681	-10.7711	-10.6223
527.5	416.5	11.1569	4.58682	-3.96924	-7.63966	-7.50359	-8.31767	-5.88999	-3.36932	-4.64312	-7.68333	-8.93124	-7.03385	-8.13459	-8.52865	-7.91412	-3.09509	-5.99826	-12.102	-9.93672	-11.084	-9.80991	-11.3396	-9.60817	-10.8932	-12.1916	-11.3363	-4.48115	-5.78756	-7.35323	-8.6716	-6.50852	-8.02628	-7.49722	-8.90311	-5.34686	-11.7303	-6.41057	-8.26416	-6.19409	-6.85135	-7.85561	-6.07689	-8.19784	-10.24	-7.83252	-7.06637	-9.48701	-6.81101
528.5	416.5	11.157	4.58682	-7.49799	-7.74917	-7.16883	-8.31325	-7.18139	-4.31168	-5.61438	-4.95997	-10.5007	-7.40091	-10.5627	-7.68611	-7.75706	-3.93194	-7.44484	-7.62645	-9.91058	-12.2694	-12.7207	-9.61396	-10.4527	-10.9855	-10.7297	-12.1904	-5.51066	-3.82124	-9.00712	-7.5387	-6.74376	-7.88813	-5.95248	-9.36179	-7.25361	-11.868	-6.78187	-7.4722	-5.72621	-8.09569	-7.87468	-8.23232	-4.93988	-7.32093	-5.9907	-7.62603	-9.69188	-7.40589
529.5	416.5	11.1571	4.58682	-5.97944	-6.7094	-7.61525	-7.90139	-5.75413	-6.12789	-7.26938	-6.33067	-9.62219	-9.03212	-10.8242	-9.36256	-6.30056	-5.3404	-6.76585	-5.79604	-10.2786	-11.4133	-13.1905	-8.01196	-7.93776	-11.0727	-9.9342	-10.7044	-8.04365	-4.0511	-10.1431	-8.46789	-8.49529	-9.49878	-6.68863	-8.77823	-7.06323	-12.807	-8.01825	-8.83869	-6.44106	-10.7919	-7.42559	-12.146	-4.30488	-6.09513	-6.36845	-10.5175	-10.9325	-9.96812
530.5	416.5	11.1571	4.58682	-4.67183	-5.8491	-9.18324	-8.89218	-3.52122	-4.31552	-5.72131	-7.71256	-7.55472	-11.9268	-9.57303	-11.4541	-5.64252	-4.29233	-6.12144	-5.17091	-7.31323	-8.61083	-10.2699	-7.03104	-6.09076	-11.1194	-10.2831	-6.188	-11.3726	-6.57217	-9.47869	-10.7517	-12.7134	-10.7585	-8.73136	-10.5042	-6.60485	-9.43274	-7.85649	-11.8562	-9.24855	-12.287	-8.21102	-11.3677	-8.10244	-7.78806	-8.33811	-11.2709	-12.9164	-11.9294
531.5	416.5	11.1572	4.58682	-4.41405	-6.18118	-9.02464	-7.98888	-4.82565	-4.35939	-5.11967	-7.93051	-7.00816	-6.97292	-6.64744	-7.82584	-5.4054	-6.19007	-5.35716	-5.85569	-6.24547	-5.76961	-6.82509	-6.58589	-7.18628	-10.5242	-9.87506	-3.95071	-9.58493	-7.14162	-6.54525	-10.7935	-11.2534	-10.2132	-11.3496	-10.1832	-8.63697	-8.69066	-6.25298	-11.8851	-14.3804	-12.0632	-9.22397	-8.33015	-13.9016	-8.43984	-8.88343	-11.2335	-14.7595	-12.248
527.5	417.5	11.1569	4.58673	-2.26037	-5.93969	-8.18343	-5.99192	-2.62522	-1.71056	-3.494	-7.65201	-7.0182	-6.65562	-6.78691	-6.60175	-7.64232	-3.2857	-4.41443	-13.5359	-12.7277	-11.6372	-11.3218	-14.6505	-9.98725	-12.4009	-12.1288	-11.9447	-5.81779	-7.82254	-5.25386	-5.12819	-8.29897	-9.42569	-9.17564	-8.85822	-5.56523	-10.4954	-8.16283	-7.24525	-5.6036	-8.47591	-9.06766	-7.31229	-7.36844	-12.1993	-10.1909	-7.65481	-10.7002	-6.00677
528.5	417.5	11.157	4.58673	-4.85649	-5.86266	-8.83752	-7.50475	-5.49485	-2.89235	-4.51399	-5.04498	-8.87897	-7.42175	-8.44396	-6.18908	-10.4288	-3.41067	-6.00026	-9.38255	-12.3816	-10.6801	-12.721	-12.0008	-10.4622	-11.8661	-12.5359	-14.4486	-6.67264	-5.01684	-6.73267	-4.4357	-6.48415	-10.2018	-8.09287	-11.6089	-6.25059	-11.3648	-8.67178	-6.83338	-4.68906	-9.38226	-11.5589	-8.95364	-5.26238	-9.44478	-7.83693	-9.00623	-8.54688	-6.54406
529.5	417.5	11.1571	4.58673	-3.9087	-5.65863	-8.7674	-8.25987	-6.65506	-4.70316	-5.91452	-4.96219	-9.77555	-9.95571	-8.84954	-8.16803	-9.24418	-4.72973	-6.26358	-8.23586	-11.0799	-9.72149	-12.2828	-9.36333	-8.7618	-10.9564	-10.3622	-9.18051	-8.70101	-5.07478	-8.33515	-5.31358	-7.66094	-10.9223	-8.21728	-10.7443	-6.28743	-11.4042	-9.92135	-8.68133	-6.28311	-10.7996	-12.0364	-12.8128	-5.71005	-8.58346	-8.3774	-11.832	-8.70276	-9.37657
530.5	417.5	11.1571	4.58673	-3.57201	-6.20668	-9.59968	-9.26914	-5.45974	-3.98895	-6.4634	-7.06569	-8.48273	-13.0475	-8.33072	-11.7045	-7.21017	-3.85185	-5.1558	-7.7758	-7.92748	-9.30346	-10.2886	-7.28843	-6.79924	-9.46973	-9.48069	-4.70392	-9.89598	-7.35256	-8.78413	-7.57037	-11.7474	-10.8085	-10.4775	-10.739	-6.5049	-11.255	-8.32315	-10.8776	-10.4797	-11.1245	-12.3254	-13.7402	-9.22487	-9.52314	-10.2012	-12.4982	-12.0919	-12.2079
531.5	417.5	11.1572	4.58673	-4.20385	-7.85049	-10.2174	-8.65189	-6.93143	-5.07813	-8.05669	-8.24971	-7.44391	-9.85531	-7.41306	-11.3355	-5.4947	-6.16559	-4.29406	-7.26649	-6.5312	-7.49636	-8.2065	-5.7981	-5.85021	-8.18212	-8.05553	-2.44321	-8.74447	-7.17595	-6.00708	-10.3496	-13.3475	-10.3373	-11.4417	-10.3076	-7.74222	-11.0725	-6.59183	-10.2617	-15.1371	-11.0089	-9.6783	-9.37104	-13.4342	-9.20775	-11.4464	-12.1053	-14.4736	-13.7056
527.5	418.5	11.1569	4.58664	-3.24918	-5.0284	-6.42685	-5.27966	-1.86772	-2.41324	-4.30459	-7.84802	-6.24501	-7.23189	-7.68462	-5.6306	-8.14264	-6.25193	-5.50799	-13.7399	-12.3415	-11.9955	-10.4597	-13.5133	-10.9697	-11.5102	-9.28396	-8.07274	-8.6455	-9.17369	-5.40862	-3.94842	-10.0896	-10.1151	-7.41254	-8.5326	-7.09739	-9.86018	-9.12773	-6.77393	-6.12635	-11.0318	-8.64779	-8.42913	-7.40806	-10.2312	-10.0212	-9.87269	-12.7239	-6.71567
528.5	418.5	11.157	4.58664	-4.8483	-4.48452	-7.3485	-6.82098	-4.42411	-3.22695	-4.8309	-6.07611	-6.89621	-7.04561	-7.97007	-5.22875	-9.56193	-5.31645	-7.56553	-11.3152	-11.5719	-10.1637	-10.6128	-13.6805	-11.7279	-12.2356	-11.2274	-10.2456	-9.60587	-7.72605	-6.57853	-3.76921	-7.60366	-11.2336	-7.7663	-12.9446	-7.67088	-9.62249	-10.8859	-6.68542	-5.904	-11.5695	-12.4631	-9.19394	-7.13887	-9.59955	-9.66018	-11.3176	-7.98349	-6.18212
529.5	418.5	11.1571	4.58664	-3.77736	-5.42059	-8.93611	-8.65155	-7.42091	-4.03763	-5.30671	-4.78139	-8.29113	-9.14617	-7.99172	-6.93245	-10.8419	-5.07763	-8.23286	-10.4513	-11.1493	-8.80397	-11.1103	-10.6197	-10.8538	-11.5402	-10.7863	-9.19452	-11.087	-8.37811	-8.17587	-4.31296	-7.75576	-11.2145	-9.6009	-12.7357	-7.43726	-10.8238	-10.8354	-7.25636	-7.42251	-11.8659	-16.0238	-12.0646	-7.33487	-9.75704	-10.1098	-14.1607	-7.6583	-8.7993
530.5	418.5	11.1571	4.58664	-2.93957	-7.90737	-9.12421	-9.80736	-7.82004	-4.09183	-4.7219	-7.71819	-10.9316	-12.8803	-8.6252	-11.9384	-9.848	-4.65516	-5.61722	-12.33	-8.01749	-8.93455	-9.70774	-7.54834	-8.39015	-8.40357	-9.55037	-5.66863	-10.6933	-9.52297	-10.249	-4.98633	-9.97329	-11.3788	-11.1568	-10.8021	-7.40036	-13.8642	-8.64632	-7.68546	-10.4331	-12.1041	-14.5578	-13.449	-8.18285	-10.7831	-11.6659	-15.0145	-11.1985	-11.8167
531.5	418.5	11.1572	4.58664	-4.82213	-10.7641	-9.47767	-9.23018	-9.94502	-5.13626	-6.54078	-9.60644	-10.664	-13.5129	-8.22393	-13.8188	-6.82726	-6.0029	-4.31567	-10.3173	-5.85477	-8.78878	-6.04587	-5.32967	-6.43397	-6.49471	-8.48	-3.55809	-9.63909	-8.07249	-7.76889	-6.5264	-12.5793	-11.4606	-10.5514	-9.74353	-7.7438	-11.9799	-6.96621	-8.23711	-12.6168	-10.9582	-10.7419	-11.265	-10.266	-11.3803	-13.4631	-12.5491	-12.1338	-11.789
528.5	419.5	11.157	4.58655	-8.36176	-5.72687	-8.46835	-6.97698	-5.58931	-4.50024	-5.84302	-6.67773	-5.70627	-6.61653	-8.98417	-5.43138	-10.076	-9.91547	-8.87308	-13.2852	-8.54507	-9.21038	-7.74101	-13.7636	-10.7839	-8.83327	-10.2341	-6.29583	-10.5139	-11.2035	-6.03979	-4.66084	-8.30791	-10.0369	-6.74769	-11.3765	-10.2225	-9.00013	-9.91717	-6.71806	-6.83522	-12.1601	-11.4383	-7.51692	-8.5065	-8.46274	-8.80792	-11.6508	-8.63535	-6.59524
529.5	419.5	11.1571	4.58655	-6.24999	-6.71722	-9.41688	-9.48744	-7.53112	-4.9055	-6.81109	-5.91151	-7.80837	-8.51089	-9.04708	-6.12344	-10.8225	-8.13154	-9.96591	-12.303	-8.51919	-8.0874	-10.8813	-12.5872	-9.82607	-8.55654	-10.5764	-7.58286	-13.1918	-11.1898	-6.77903	-4.67136	-7.45042	-9.48967	-9.07775	-11.1611	-10.4333	-11.8774	-10.8433	-8.00966	-9.39476	-12.2408	-13.1556	-7.82576	-8.13072	-10.5026	-9.52117	-11.931	-8.48708	-8.14821
530.5	419.5	11.1571	4.58655	-5.09744	-9.47776	-8.96395	-11.0216	-7.78587	-5.03148	-6.32149	-8.90369	-12.274	-11.2097	-11.4553	-10.1316	-11.7022	-6.45351	-7.91796	-12.0582	-6.48938	-6.99898	-9.196	-8.90095	-7.30799	-7.817	-9.33	-7.37625	-13.7078	-10.6254	-9.40049	-4.58154	-7.48515	-11.1502	-10.1495	-10.2996	-10.1287	-13.5189	-9.73971	-8.72397	-11.9353	-10.6075	-11.5609	-9.45268	-7.75901	-13.6238	-11.6187	-10.9767	-10.1015	-8.76744
531.5	419.5	11.1572	4.58655	-6.70148	-11.9502	-8.94803	-10.4642	-9.40073	-6.39016	-6.96773	-11.0083	-16.9178	-11.0915	-10.746	-13.0473	-9.32424	-6.12849	-5.80562	-10.9337	-4.85397	-7.16138	-5.27967	-6.85055	-5.90888	-6.78578	-8.37398	-6.34737	-11.5431	-8.66067	-9.33527	-4.93625	-9.53173	-12.8767	-9.61446	-9.24373	-8.45821	-11.6837	-8.37877	-8.81966	-13.8044	-10.4949	-9.95215	-10.951	-8.38343	-14.9159	-15.6841	-10.164	-9.2219	-7.55671
528.5	420.5	11.157	4.58646	-12.8921	-9.68798	-10.8177	-7.03201	-6.97414	-4.51262	-6.26782	-6.36523	-5.36044	-8.53802	-9.31629	-5.75133	-8.50053	-12.9784	-6.52104	-9.07102	-6.77224	-7.97054	-6.29883	-9.97077	-9.66915	-7.09574	-9.24284	-6.76826	-8.44633	-12.031	-5.17126	-6.41855	-8.22601	-8.89608	-8.24149	-7.15563	-8.08618	-10.4477	-9.55124	-7.35672	-8.83864	-8.13567	-10.624	-8.81455	-7.72116	-8.62443	-7.92101	-10.6971	-8.54713	-8.24051
529.5	420.5	11.1571	4.58646	-7.84129	-10.3648	-10.1234	-9.48533	-6.43936	-6.31329	-6.74596	-6.77235	-8.95302	-9.8375	-10.0361	-5.75667	-10.2992	-8.49734	-6.7082	-9.32803	-7.54597	-7.43854	-9.94453	-10.3628	-8.72594	-6.65408	-11.3164	-6.5102	-11.5445	-12.4768	-5.55714	-5.60163	-6.53209	-8.79758	-10.5397	-7.64682	-8.55522	-11.13	-11.256	-11.357	-11.824	-7.30364	-10.1661	-8.9983	-8.09547	-12.9295	-7.29022	-10.6965	-8.69641	-7.97604
530.5	420.5	11.1571	4.58646	-6.43834	-10.0267	-9.58959	-11.8096	-6.97256	-6.98599	-7.31527	-9.44832	-12.2756	-11.1747	-12.0497	-10.2687	-11.9924	-6.36265	-8.03528	-9.20051	-6.57684	-6.16213	-9.81546	-10.0457	-6.5618	-7.84328	-9.01252	-6.43897	-9.50361	-11.8314	-6.71429	-5.38676	-5.91343	-11.3776	-10.4528	-9.34014	-11.3798	-10.7386	-12.4737	-12.9642	-13.457	-5.91462	-8.99091	-9.11063	-8.43683	-15.5559	-9.48024	-11.1288	-8.9015	-6.14786
531.5	420.5	11.1572	4.58646	-9.38717	-10.0761	-10.9472	-12.6284	-7.93614	-8.71109	-9.37964	-11.2555	-16.2163	-11.2275	-11.8258	-13.4296	-10.1784	-6.236	-7.79734	-8.595	-5.60241	-6.39025	-6.30965	-10.0229	-5.15259	-9.04972	-7.29036	-7.18562	-8.47263	-8.92084	-7.15793	-5.49573	-9.06226	-13.1396	-11.413	-9.70659	-9.73534	-10.2545	-11.1306	-11.3515	-13.3055	-8.13864	-8.61511	-9.71417	-8.57702	-13.9449	-13.7045	-9.7483	-8.07656	-4.36928
536.5	420.5	11.1577	4.58646	-11.6491	-5.09215	-5.2975	-2.60265	-9.48699	-9.19499	-10.5458	-6.55742	-7.363	-5.69665	-5.81903	-10.2645	-5.65419	-9.59808	-9.85509	-12.0336	-9.76436	-6.77142	-11.6551	-9.03426	-8.60974	-9.83192	-9.19331	-9.34415	-4.20427	-8.46803	-8.27782	-7.24729	-8.00184	-8.90237	-8.33553	-6.57352	-6.95013	-8.36568	-8.33924	-6.4068	-10.9042	-9.31867	-12.5225	-8.90334	-6.80569	-5.32558	-8.4387	-6.13479	-6.93856	-9.21203
537.5	420.5	11.1578	4.58645	-10.9953	-6.4081	-6.79783	-4.42324	-9.84547	-8.82337	-9.326	-6.62422	-5.57396	-6.04672	-5.70223	-8.05077	-7.04941	-9.522	-7.54239	-9.61201	-11.167	-7.00863	-14.0003	-10.1793	-10.6246	-14.7005	-10.5878	-12.432	-4.91837	-8.23308	-10.1011	-7.91784	-9.22141	-6.72876	-7.48458	-7.90071	-9.38687	-7.75785	-7.1625	-6.05323	-11.1672	-9.86727	-9.07111	-9.63805	-8.43263	-6.64492	-11.2534	-8.08038	-9.57623	-10.2916
538.5	420.5	11.1579	4.58645	-11.2809	-5.13421	-6.40517	-5.3533	-10.1909	-8.15118	-7.6813	-7.64577	-5.36965	-5.88597	-3.70554	-8.40956	-7.6629	-9.23098	-9.15751	-7.79934	-10.9846	-10.583	-15.7538	-10.9944	-12.7061	-12.9591	-10.2615	-14.9721	-6.62575	-7.23546	-11.4633	-11.4738	-7.50802	-6.86868	-8.31388	-6.80328	-8.72484	-8.03215	-5.60509	-8.52442	-9.94121	-9.01809	-8.70376	-10.3874	-7.96799	-8.34281	-9.26931	-11.1384	-9.95326	-9.31146
539.5	420.5	11.1579	4.58645	-5.65639	-4.41924	-7.88809	-3.94593	-7.38739	-9.84186	-4.82548	-5.18162	-6.44635	-5.63323	-4.79902	-7.4496	-5.17914	-10.4925	-9.91041	-9.56456	-10.4554	-14.2643	-9.30118	-10.6109	-10.6017	-11.5725	-8.81121	-13.6777	-6.46195	-7.91377	-9.86478	-11.7022	-8.08203	-9.60305	-11.1838	-6.80021	-9.6421	-9.06564	-5.98296	-7.83223	-7.80383	-8.23178	-11.4004	-11.835	-5.89042	-10.5876	-8.38176	-12.0968	-8.83817	-7.5072
540.5	420.5	11.158	4.58645	-5.61124	-4.71613	-9.65068	-4.40918	-4.95461	-5.72305	-4.0156	-3.86045	-8.24057	-6.25751	-6.77088	-7.4044	-5.54809	-10.1143	-8.31389	-12.7654	-9.18251	-13.9391	-9.09802	-13.0857	-7.73186	-12.7984	-11.0027	-13.9962	-7.31401	-10.7605	-10.8647	-9.51318	-10.1893	-12.3779	-11.7707	-8.83292	-9.3692	-8.03055	-9.8144	-8.45469	-7.38591	-7.86769	-12.4305	-13.0862	-8.08827	-11.5065	-10.0286	-10.6283	-8.91662	-8.21697
528.5	421.5	11.157	4.58637	-11.1084	-10.2292	-10.5458	-7.45984	-8.08451	-5.57925	-6.22277	-5.82208	-7.11642	-10.1046	-9.4754	-5.89229	-7.24808	-9.87326	-5.74733	-5.00911	-5.62091	-8.82673	-6.19664	-7.35822	-11.5011	-6.77013	-8.46598	-7.20413	-7.99935	-9.32401	-6.61401	-7.31939	-8.97308	-8.92121	-10.1633	-6.23173	-5.63617	-11.6973	-9.59129	-8.06444	-12.6321	-5.85821	-9.196	-9.98574	-6.09686	-9.96565	-6.19187	-9.63012	-9.5094	-11.6748
529.5	421.5	11.157	4.58637	-7.60981	-13.3305	-8.83754	-9.30474	-7.36432	-6.56207	-4.87216	-6.89771	-11.5794	-11.0484	-10.9364	-5.58638	-9.3986	-7.29856	-5.13891	-5.63415	-7.06598	-9.56119	-8.82824	-8.00893	-11.2149	-6.9662	-10.5365	-6.20304	-9.10982	-11.6495	-6.64764	-5.41387	-6.01087	-9.53624	-11.8899	-6.87898	-5.64526	-9.38488	-11.5246	-10.082	-12.3415	-3.84521	-9.62804	-10.1203	-6.22254	-14.5231	-5.58528	-10.2871	-9.2545	-9.52724
530.5	421.5	11.1571	4.58637	-6.12708	-10.4863	-8.64763	-11.28	-7.54908	-7.4387	-4.30721	-10.5719	-13.0346	-12.8944	-9.91356	-11.3653	-9.88849	-5.11988	-7.20637	-6.06831	-7.20098	-8.88222	-10.8713	-8.89842	-7.43192	-8.72514	-8.65472	-6.01275	-6.02773	-12.3142	-6.32834	-4.80885	-5.64414	-11.0761	-11.2297	-8.13397	-8.18659	-8.39905	-12.1432	-12.2302	-10.3526	-3.30696	-8.99431	-11.4369	-7.34269	-12.7172	-7.36879	-11.7432	-8.57245	-6.10698
531.5	421.5	11.1572	4.58637	-7.36015	-8.84142	-10.3343	-12.3597	-6.93498	-9.00525	-6.70086	-10.0349	-15.6518	-12.3401	-9.14843	-11.3398	-8.07416	-5.2629	-9.4911	-6.32355	-7.91881	-8.09025	-8.14845	-10.013	-5.85495	-10.6532	-6.91327	-7.76045	-6.14335	-9.32567	-5.60112	-5.39745	-8.59689	-12.2559	-11.4009	-9.18278	-9.95561	-7.44546	-11.2465	-12.9827	-8.861	-5.27063	-8.82273	-10.6556	-9.15821	-12.4984	-9.07179	-10.7528	-8.05243	-3.72953
536.5	421.5	11.1577	4.58637	-7.96794	-5.11112	-7.2563	-4.39706	-8.28853	-6.2223	-8.81297	-7.28019	-9.82487	-5.21145	-7.16128	-9.91128	-8.3364	-8.91763	-8.61526	-11.9267	-11.0416	-6.43714	-9.32607	-8.84763	-8.74532	-8.25794	-9.92648	-14.9915	-4.52744	-12.0124	-8.07897	-12.2307	-7.48752	-10.1669	-7.06007	-6.92219	-8.74209	-6.45972	-11.6967	-8.89585	-10.8154	-11.4096	-11.6483	-6.88418	-8.1273	-6.38752	-9.891	-8.08856	-9.39618	-7.93444
537.5	421.5	11.1578	4.58636	-9.35754	-5.75576	-7.63602	-5.21242	-7.26877	-5.25606	-7.93176	-8.28143	-7.49491	-7.69332	-8.16203	-8.52846	-9.28504	-8.59085	-8.31519	-9.55889	-11.9092	-7.25651	-11.9445	-8.47977	-12.3017	-9.38914	-9.12381	-14.2338	-5.84731	-11.2776	-10.8621	-11.8721	-8.94219	-8.71931	-6.77292	-7.32083	-10.6032	-5.77994	-9.33249	-8.37666	-12.2116	-12.2537	-9.91645	-8.86924	-7.79702	-7.71388	-12.1047	-7.63986	-11.1818	-7.87108
538.5	421.5	11.1579	4.58636	-11.0738	-5.25337	-7.22956	-5.59564	-7.85465	-6.22241	-7.96025	-8.31248	-7.46476	-8.51712	-7.1156	-8.11791	-10.6993	-8.69878	-9.0987	-8.54081	-11.4258	-9.14607	-14.6368	-10.5619	-14.3829	-10.9472	-8.03603	-13.777	-7.52683	-9.14436	-11.3946	-12.6303	-7.90348	-9.55261	-7.48061	-8.31618	-8.45836	-7.10935	-7.10393	-9.87129	-10.0028	-11.0453	-9.00615	-8.67376	-7.01448	-9.03201	-9.99204	-9.53899	-10.321	-8.72371
539.5	421.5	11.1579	4.58636	-6.49659	-4.73329	-7.17193	-3.9565	-7.96583	-8.74968	-6.42275	-5.14175	-7.8933	-7.03583	-6.33053	-6.35478	-9.06082	-9.63522	-9.68294	-9.54262	-8.90604	-9.56573	-10.7021	-10.1731	-12.2917	-12.3211	-6.77995	-13.2144	-7.53263	-7.44577	-10.767	-9.35611	-7.84223	-12.8735	-9.87688	-9.73642	-9.2896	-7.97596	-7.16145	-8.08303	-9.55027	-9.02831	-9.09624	-9.25428	-5.51842	-10.1964	-8.66796	-12.3284	-7.66809	-8.71506
540.5	421.5	11.158	4.58636	-4.78213	-5.40646	-8.17454	-3.55449	-6.65424	-7.33502	-6.39109	-4.26388	-10.0951	-6.14391	-6.1338	-7.28719	-7.29246	-10.7333	-8.05063	-13.6424	-6.70155	-11.8069	-9.37767	-11.227	-9.66796	-11.0854	-9.39125	-11.4806	-9.30514	-9.77001	-10.866	-7.89005	-9.07105	-12.749	-13.1456	-9.74612	-8.95084	-4.40029	-10.4269	-7.50532	-10.0381	-8.61799	-9.5288	-11.1019	-6.72725	-12.0421	-9.94733	-10.6921	-8.05663	-7.65555
536.5	422.5	11.1577	4.58628	-4.72031	-5.19749	-8.44287	-5.9266	-7.29936	-4.97108	-7.46791	-7.49572	-9.95268	-5.73837	-7.39057	-9.07416	-6.95684	-6.95032	-8.13316	-13.8831	-12.5611	-6.38435	-10.3241	-7.85136	-7.26509	-8.46496	-10.757	-14.6608	-7.20469	-11.7191	-7.79851	-10.3942	-7.05507	-8.71424	-7.88622	-7.93472	-8.18796	-5.12352	-12.5187	-11.0084	-11.0922	-12.3734	-11.1615	-6.55547	-11.9667	-9.00695	-10.3138	-9.11625	-12.4032	-5.4812
537.5	422.5	11.1578	4.58628	-5.97648	-4.44197	-8.34106	-7.1345	-5.88891	-3.11649	-6.15808	-8.23985	-9.16515	-8.59371	-9.20651	-9.70906	-7.46602	-6.80097	-9.2653	-10.2785	-12.0844	-7.11497	-12.0593	-7.86625	-12.2079	-7.54047	-7.87388	-12.6317	-6.44525	-12.9856	-11.3845	-13.3172	-8.28945	-7.99656	-7.17918	-5.95612	-8.9904	-5.24206	-12.8615	-10.7331	-11.4021	-10.8923	-9.76185	-9.70161	-9.28704	-7.80372	-11.2348	-9.77219	-13.6569	-6.12893
538.5	422.5	11.1579	4.58627	-9.48745	-3.66489	-8.94211	-7.32076	-5.96583	-3.91856	-6.81787	-8.83687	-7.95388	-7.7113	-7.53352	-7.19698	-6.78983	-8.88141	-8.18736	-10.3131	-11.6888	-8.26143	-12.6126	-9.40828	-15.6211	-7.85317	-5.95071	-11.8609	-7.22748	-14.0121	-11.8273	-12.7308	-8.4121	-7.99735	-8.38519	-8.38828	-7.34639	-8.42056	-11.8477	-12.5149	-8.64338	-10.9729	-8.36759	-9.09061	-7.57167	-8.65357	-9.98633	-11.2393	-10.0784	-6.85593
539.5	422.5	11.1579	4.58627	-9.69889	-3.72073	-6.77323	-5.52348	-7.00288	-6.78115	-7.37504	-8.22398	-7.36112	-6.45729	-6.28283	-4.38899	-5.68363	-9.56844	-8.62924	-11.3497	-9.39792	-7.48059	-12.9042	-8.77925	-13.2234	-9.75566	-5.78627	-11.6714	-8.98246	-11.1491	-12.9696	-8.31561	-8.25982	-9.67614	-9.16206	-15.5171	-10.2241	-7.03668	-10.2488	-9.59166	-9.17672	-9.89041	-8.14786	-8.86242	-5.88004	-10.4472	-9.78083	-13.2329	-6.7216	-6.70946
540.5	422.5	11.158	4.58627	-5.73572	-5.15265	-6.26547	-4.38514	-8.0046	-9.91061	-7.75591	-6.26928	-7.06719	-6.07205	-5.19787	-3.74785	-6.35269	-8.8089	-8.50505	-11.3411	-7.37167	-9.34979	-12.4899	-8.74944	-10.6645	-7.44635	-8.13277	-10.2985	-12.7792	-12.4503	-12.0516	-8.20905	-9.03112	-11.6058	-10.6353	-11.9896	-10.2053	-3.47385	-12.3446	-8.25583	-11.5901	-10.6719	-9.46046	-10.9111	-7.22699	-11.8399	-10.8022	-9.75651	-7.11681	-7.07766
536.5	423.5	11.1577	4.58619	-3.9904	-5.04121	-8.58769	-6.22749	-6.58167	-6.96845	-8.18745	-7.94831	-8.44873	-6.5798	-7.10693	-9.91424	-3.73187	-7.50155	-9.37693	-13.5432	-12.6425	-8.24606	-9.12993	-7.44277	-7.49666	-10.4763	-10.328	-10.6527	-6.23198	-7.68131	-9.56732	-8.18141	-6.75089	-8.13766	-8.67407	-8.10138	-7.72361	-5.39717	-9.9922	-12.6115	-10.4865	-8.05827	-9.64772	-7.73796	-10.5673	-6.87265	-10.2413	-7.37854	-10.8232	-4.09258
537.5	423.5	11.1578	4.58619	-5.15606	-4.76624	-7.86441	-7.27981	-5.79285	-5.01289	-5.35007	-7.49655	-7.48469	-7.82177	-6.72583	-10.0565	-4.57554	-6.56336	-11.1601	-11.1533	-11.7215	-6.6194	-11.0476	-9.05105	-11.4559	-8.87153	-7.0593	-9.88115	-5.30474	-11.5329	-11.2618	-11.7579	-7.04115	-7.53278	-8.48589	-6.42971	-8.48461	-7.66776	-11.7993	-11.4955	-10.4721	-8.89365	-8.74307	-11.79	-10.7706	-5.95369	-10.1464	-11.355	-13.7173	-5.79878
538.5	423.5	11.1579	4.58618	-8.2294	-4.22569	-8.03301	-9.0277	-6.76326	-3.71506	-6.75437	-7.89354	-5.99781	-7.00128	-5.56304	-8.36528	-4.53113	-8.60945	-8.36643	-11.2083	-12.1226	-7.86238	-10.4377	-11.5625	-14.403	-7.54387	-5.81471	-9.43561	-6.12809	-11.7325	-9.92569	-11.5691	-8.23753	-6.73619	-10.4284	-8.5199	-7.52931	-10.3832	-13.9241	-10.1097	-8.4099	-9.05972	-8.41352	-9.91053	-8.55898	-6.82286	-10.6786	-13.6858	-9.77114	-6.06673
539.5	423.5	11.1579	4.58618	-10.3611	-4.62386	-7.33599	-8.09572	-6.9734	-4.81086	-8.89674	-8.81022	-5.37129	-6.05951	-5.30967	-4.73868	-3.38559	-8.06806	-8.79585	-13.0107	-10.2392	-8.27782	-12.7215	-8.43664	-11.5499	-8.06164	-6.07136	-10.9854	-9.78408	-11.8694	-10.3055	-8.82808	-10.1798	-8.30321	-9.12872	-10.5623	-8.84183	-5.75103	-11.0199	-9.52442	-9.28321	-8.68216	-9.46276	-9.28198	-7.11744	-9.41986	-10.1411	-13.3638	-6.31602	-5.59293
540.5	423.5	11.158	4.58618	-7.51936	-6.28622	-6.46325	-5.60129	-8.98224	-9.73619	-8.47438	-7.58745	-4.75064	-6.79566	-5.54272	-4.94687	-3.17438	-7.16709	-9.91835	-11.6245	-9.21102	-9.69324	-12.4163	-7.77929	-10.4851	-6.53282	-7.49386	-11.8598	-12.9573	-15.0687	-9.44052	-10.8738	-9.79479	-9.84067	-7.81149	-9.26677	-8.58162	-4.57625	-12.4877	-10.4701	-11.2404	-11.689	-11.0211	-10.1448	-9.43444	-9.96789	-8.94866	-9.31163	-7.3244	-6.90798
511.5	424.5	11.1554	4.58612	-7.04967	-2.87142	-4.89005	-6.23051	-4.85032	-3.89476	-6.34037	-3.3233	-9.50776	-5.10271	-6.28419	-8.99077	-1.86652	-9.59489	-11.2526	-8.71785	-7.50273	-7.41241	-10.562	-10.1623	-8.83628	-7.39083	-7.69445	-6.72851	-6.05141	-4.32641	-9.09558	-10.9691	-9.87155	-8.61615	-9.76022	-5.92732	-7.19862	-8.16462	-6.34731	-7.04585	-6.48632	-4.31792	-4.39371	-7.59566	-5.55393	-8.99583	-6.75197	-7.80846	-8.40861	-7.82528
536.5	424.5	11.1577	4.5861	-6.08889	-4.69685	-9.33311	-6.30821	-7.28561	-10.3954	-7.87192	-8.9365	-6.23835	-9.63554	-5.7979	-8.33897	-3.86333	-9.55213	-9.33647	-11.2615	-11.4022	-8.44855	-8.45384	-8.83482	-9.56628	-7.48733	-9.10966	-7.57056	-5.24892	-5.93459	-12.3524	-7.94567	-6.23501	-9.5545	-7.19161	-7.83153	-8.79282	-7.09407	-10.1056	-10.2782	-9.56628	-6.43879	-8.62142	-8.89106	-7.78839	-5.46085	-10.8341	-6.87871	-8.31913	-5.11424
537.5	424.5	11.1578	4.5861	-6.26776	-4.59653	-7.89519	-7.65025	-6.32652	-10.5407	-5.52915	-8.10624	-6.0185	-8.74184	-4.91748	-8.2963	-4.38096	-9.70295	-10.7216	-8.51183	-11.34	-6.92104	-9.36686	-11.6395	-13.0592	-10.4619	-5.93377	-8.15836	-5.99925	-8.81468	-11.2653	-11.408	-6.90345	-8.61629	-9.48763	-7.39277	-9.42306	-9.89189	-12.0797	-8.82133	-10.4738	-8.35644	-7.48583	-10.9115	-8.69353	-5.25296	-10.2663	-8.45189	-11.6168	-6.78362
538.5	424.5	11.1578	4.58609	-6.94943	-5.14009	-6.32504	-8.68278	-8.00624	-6.57864	-7.1464	-7.67228	-5.45856	-7.10968	-4.60401	-7.81006	-4.70732	-10.3219	-10.1464	-8.78834	-13.1401	-7.40835	-9.96597	-11.4482	-13.7974	-9.27119	-5.79129	-8.36723	-7.14441	-9.37962	-8.62339	-11.1541	-8.83189	-7.23565	-12.2164	-8.16537	-8.23867	-8.15776	-12.1295	-8.17757	-9.21713	-9.26316	-6.85969	-9.52569	-8.97422	-6.93354	-10.5426	-9.94513	-9.81926	-6.658
539.5	424.5	11.1579	4.58609	-7.66358	-6.38335	-6.21995	-7.81743	-8.7826	-4.90848	-9.62161	-6.92804	-4.74715	-6.89921	-5.24707	-6.54119	-4.18857	-8.20984	-8.92884	-12.4059	-9.10393	-9.08015	-13.195	-8.32156	-10.6424	-8.72878	-6.96958	-10.1179	-10.1357	-9.76638	-7.70424	-9.27911	-11.324	-7.81569	-10.1968	-8.17471	-8.51357	-6.06003	-10.3141	-8.46455	-9.27201	-8.49503	-7.33245	-11.3455	-8.62389	-8.74248	-8.36043	-10.9921	-6.96066	-6.62798
540.5	424.5	11.158	4.58609	-7.87083	-9.80978	-6.81916	-5.81807	-9.86287	-5.80261	-9.88566	-5.48418	-4.64688	-7.37515	-6.14142	-5.87693	-3.06521	-6.7503	-8.86764	-10.148	-7.10779	-10.4058	-11.6581	-7.0945	-9.94407	-7.30295	-7.31339	-11.7606	-10.3111	-12.8045	-8.87628	-9.7976	-9.60638	-8.18671	-7.75806	-7.34415	-6.77325	-7.29745	-12.173	-11.3742	-10.4635	-10.412	-8.67474	-11.0678	-10.7301	-8.73777	-6.84729	-9.37498	-8.44975	-7.32676
507.5	425.5	11.1551	4.58604	-6.56701	-5.37889	-4.91837	-5.84457	-5.03769	-9.53892	-10.7051	-7.09264	-11.4994	-4.47453	-4.81813	-4.06762	-4.01764	-9.12543	-6.73079	-8.63679	-9.55178	-8.03732	-10.0035	-9.25359	-8.42222	-7.50962	-6.52737	-9.40356	-8.83308	-9.86834	-5.64959	-5.0788	-8.71673	-6.23435	-6.3604	-8.98332	-10.2713	-6.4606	-6.42275	-7.92762	-6.49669	-8.85806	-7.95453	-10.3328	-9.01511	-11.5566	-7.93776	-8.3699	-9.98371	-10.3798
508.5	425.5	11.1552	4.58604	-10.0366	-5.42702	-4.26312	-5.73304	-6.61315	-10.4005	-8.22992	-6.93201	-11.2717	-2.8331	-3.99395	-3.80278	-2.24032	-8.93249	-8.02064	-10.8151	-9.61132	-8.95136	-11.5951	-11.4144	-7.75536	-5.56564	-10.1986	-7.2044	-8.3478	-9.78577	-8.02933	-11.444	-6.94047	-5.50103	-5.16032	-10.5964	-8.13555	-5.19626	-3.43615	-6.84646	-4.98119	-7.35656	-5.1427	-8.84012	-10.3782	-13.2374	-6.09406	-5.47756	-12.3417	-8.65877
509.5	425.5	11.1553	4.58604	-9.39649	-5.88808	-3.45171	-6.2366	-8.01888	-10.0595	-5.95136	-6.07258	-12.2634	-2.3438	-3.47947	-4.04456	-1.66127	-10.2186	-8.4905	-8.59749	-6.37048	-9.58178	-8.90141	-10.0799	-6.51862	-4.30327	-10.5877	-7.46156	-7.43643	-7.05866	-9.33085	-12.815	-5.54136	-4.42377	-4.87101	-7.09872	-5.57298	-6.75209	-2.41148	-5.77691	-5.21079	-5.71561	-3.99288	-7.8108	-11.4125	-8.09971	-5.81828	-3.31998	-10.7836	-7.47274
510.5	425.5	11.1553	4.58603	-8.24619	-5.05128	-4.20297	-6.5644	-5.6911	-4.7051	-4.91795	-4.42454	-9.85792	-3.0957	-4.266	-5.32712	-2.31653	-10.7322	-10.0788	-8.95829	-4.88395	-7.69526	-9.05938	-8.73144	-8.32062	-4.4631	-8.8461	-8.84484	-6.93658	-4.78732	-8.01395	-11.9851	-6.76249	-5.5437	-6.90981	-4.32553	-5.97135	-7.08343	-4.89174	-6.8987	-6.76236	-5.99917	-4.81365	-7.09748	-8.30274	-5.90917	-6.64147	-4.43155	-8.24721	-7.1993
511.5	425.5	11.1554	4.58603	-6.72274	-4.23393	-6.30927	-6.42149	-4.58866	-3.25761	-4.46553	-4.54273	-9.79441	-4.46821	-4.67557	-8.51756	-4.0961	-10.5256	-8.6957	-9.33795	-7.45727	-8.28906	-10.0309	-10.4609	-11.5401	-6.75784	-7.22431	-6.98489	-7.84306	-5.07622	-8.10278	-12.844	-9.74808	-5.70957	-10.5381	-5.52887	-8.44325	-7.84768	-7.76282	-6.21929	-8.38229	-6.91924	-7.07585	-6.8069	-6.28128	-9.44755	-8.11923	-6.47068	-7.93716	-8.03467
508.5	426.5	11.1552	4.58595	-8.48587	-6.11369	-3.97998	-5.98001	-6.6337	-10.207	-10.3067	-6.57187	-7.06412	-4.14375	-5.18611	-4.47974	-2.65326	-9.48567	-7.10287	-11.3008	-7.55088	-11.2212	-10.5648	-9.52009	-8.71298	-8.06883	-10.3158	-10.0281	-8.47137	-9.60578	-9.45232	-8.37891	-7.19676	-6.53668	-5.97776	-10.2751	-6.92263	-6.52189	-3.91682	-4.33299	-4.04308	-9.54702	-9.21694	-6.27794	-11.6819	-11.6425	-5.89769	-4.15555	-8.06443	-7.70558
509.5	426.5	11.1553	4.58595	-7.82358	-9.58642	-4.00808	-5.70113	-4.98042	-9.09821	-5.59448	-7.31942	-5.81699	-3.8176	-4.196	-4.14512	-2.08548	-8.44668	-7.99797	-8.89179	-6.56952	-9.15715	-9.04199	-11.0213	-7.775	-5.74584	-9.57806	-10.3722	-7.57892	-6.86662	-7.93265	-7.86548	-4.78366	-5.17573	-6.70232	-7.67837	-4.64521	-6.78859	-3.71019	-3.61557	-4.23839	-8.39557	-6.48842	-5.92304	-10.369	-7.46981	-7.52053	-2.32356	-5.6379	-6.86235
510.5	426.5	11.1553	4.58594	-6.6932	-8.27789	-5.86869	-4.51059	-3.92801	-5.26471	-3.99563	-6.14913	-7.1159	-4.5553	-3.84675	-4.86861	-2.90523	-7.44641	-10.576	-8.13958	-5.77416	-7.13992	-8.79119	-11.8714	-9.32497	-5.52069	-9.38714	-10.4966	-7.49291	-4.72358	-6.84997	-8.94171	-4.81182	-5.97605	-8.64309	-6.16805	-5.45583	-7.06096	-8.48708	-5.6941	-5.65971	-9.51028	-7.67235	-6.17214	-8.48175	-6.09721	-8.21963	-3.42275	-5.96232	-7.18027
511.5	426.5	11.1554	4.58594	-6.10068	-7.1016	-7.57542	-5.44115	-3.66509	-4.14167	-3.75117	-5.17631	-8.85133	-5.5868	-4.18429	-6.33772	-4.84152	-5.1734	-7.1158	-8.70233	-7.61905	-8.09855	-9.68532	-11.6	-11.4722	-8.60419	-7.60075	-6.90319	-10.3898	-5.00588	-8.5936	-11.3159	-7.6242	-6.74724	-9.48036	-7.50435	-9.05841	-9.24168	-8.86707	-6.03832	-9.17713	-9.9838	-10.4723	-6.19099	-8.09347	-10.5357	-8.37584	-6.0448	-8.05193	-8.38376
508.5	427.5	11.1552	4.58586	-5.93621	-4.44775	-4.78828	-5.9359	-5.84156	-9.74352	-8.69038	-5.71056	-4.7133	-6.54696	-6.29435	-3.42808	-3.29744	-10.0427	-6.98298	-8.32491	-5.22778	-8.93817	-8.38545	-6.86624	-9.49633	-8.44892	-8.43049	-7.93518	-5.17522	-7.41487	-9.71792	-6.59102	-7.26173	-6.45137	-6.22485	-8.42269	-5.82657	-8.96567	-5.74808	-4.61677	-4.92469	-7.03055	-10.4922	-6.62803	-9.32712	-11.2703	-6.24857	-5.38359	-5.91543	-8.2095
509.5	427.5	11.1553	4.58586	-5.33719	-5.83074	-4.78	-5.31383	-3.72738	-7.65067	-4.92072	-6.52432	-4.03428	-6.7805	-5.77532	-3.52453	-2.4717	-7.47329	-7.62948	-10.8067	-6.94679	-7.08984	-8.53745	-9.17083	-8.50267	-7.07467	-7.36735	-8.99875	-7.42207	-7.5381	-6.092	-4.45919	-4.36022	-6.3057	-7.82398	-7.86282	-5.09627	-8.97635	-6.74135	-4.04261	-4.25786	-7.66142	-8.15547	-5.18214	-10.7705	-8.85001	-8.69187	-3.07578	-2.94746	-7.92831
510.5	427.5	11.1553	4.58586	-5.594	-6.87345	-5.31071	-3.97794	-3.22175	-5.94008	-4.29341	-6.11934	-5.60918	-7.29157	-5.6289	-4.64684	-3.0334	-5.71824	-9.49645	-8.94121	-7.35029	-7.32372	-8.90435	-12.1285	-8.90181	-8.18778	-9.62359	-10.8337	-8.62092	-6.39854	-5.82694	-5.9857	-4.27181	-7.15887	-9.6495	-8.48411	-6.57526	-8.88972	-11.8157	-6.10862	-5.22359	-10.5767	-7.39264	-5.93933	-10.8484	-7.80808	-10.0527	-4.2885	-5.07953	-8.89501
511.5	427.5	11.1554	4.58585	-6.73391	-7.3668	-5.85463	-4.88863	-3.33559	-5.77363	-4.68715	-5.77381	-7.75928	-7.4316	-6.28708	-6.2747	-4.30337	-4.11464	-7.7949	-7.69768	-7.69596	-9.61669	-8.70817	-11.3922	-10.4739	-11.4163	-8.68715	-7.71052	-9.17122	-5.81301	-7.97567	-9.92116	-7.46517	-7.95587	-9.31156	-10.127	-10.2585	-11.1937	-9.10896	-7.22498	-8.03708	-10.6142	-8.40408	-6.05779	-10.6237	-10.3754	-8.63515	-7.18114	-8.21393	-9.38352
508.5	428.5	11.1552	4.58577	-5.03989	-3.14951	-5.24178	-7.36548	-5.49712	-8.22684	-7.17105	-4.0256	-4.13592	-5.60683	-5.34245	-3.92538	-5.25813	-11.4607	-7.89619	-8.99186	-4.81532	-6.73723	-7.59754	-5.64301	-9.11658	-7.31353	-6.45454	-4.46631	-4.94165	-6.6647	-7.64794	-5.62662	-5.35884	-8.19959	-7.43877	-8.23061	-8.1441	-9.87477	-6.11141	-6.30037	-6.02523	-5.78969	-8.95362	-7.92346	-5.5228	-12.9058	-7.05983	-7.17469	-5.66852	-8.50273
509.5	428.5	11.1553	4.58577	-4.80303	-3.48003	-4.62129	-7.26635	-4.64645	-8.21826	-4.98272	-3.46371	-4.61592	-5.57508	-6.10687	-4.25463	-4.19468	-7.00154	-8.07538	-12.2104	-7.71173	-5.81404	-7.86751	-7.84419	-8.18903	-7.1741	-5.45565	-7.18838	-8.76165	-9.15847	-5.25744	-3.39505	-4.15384	-8.33166	-9.55877	-7.55631	-8.3341	-8.67858	-9.22967	-5.67594	-5.49435	-6.67188	-9.01969	-6.42732	-7.02269	-11.0555	-9.76873	-5.04094	-3.77964	-8.33122
[truncated: 497 more rows]
[truncated: 6 more columns]

## Sheet: Builtup
Pixel-X	Pixel-Y	Longitude	Latitude	Sigma0_VV_db_mst_07Apr2015	Sigma0_VV_db_slv2_25May2015	Sigma0_VV_db_slv4_06Jun2015	Sigma0_VV_db_slv6_18Jun2015	Sigma0_VV_db_slv8_12Jul2015	Sigma0_VV_db_slv10_24Jul2015	Sigma0_VV_db_slv16_05Aug2015	Sigma0_VV_db_slv18_17Aug2015	Sigma0_VV_db_slv20_10Sep2015	Sigma0_VV_db_slv22_22Sep2015	Sigma0_VV_db_slv24_04Oct2015	Sigma0_VV_db_slv26_16Oct2015	Sigma0_VV_db_slv28_28Oct2015	Sigma0_VV_db_slv30_21Nov2015	Sigma0_VV_db_slv32_03Dec2015	Sigma0_VV_db_slv34_15Dec2015	Sigma0_VV_db_slv36_08Jan2016	Sigma0_VV_db_slv38_20Jan2016	Sigma0_VV_db_slv40_13Feb2016	Sigma0_VV_db_slv42_08Mar2016	Sigma0_VV_db_slv44_20Mar2016	Sigma0_VV_db_slv46_01Apr2016	Sigma0_VV_db_slv48_13Apr2016	Sigma0_VV_db_slv50_07May2016	Sigma0_VV_db_slv54_19May2016	Sigma0_VV_db_slv56_31May2016	Sigma0_VV_db_slv58_12Jun2016	Sigma0_VV_db_slv60_06Jul2016	Sigma0_VV_db_slv62_18Jul2016	Sigma0_VV_db_slv64_30Jul2016	Sigma0_VV_db_slv66_11Aug2016	Sigma0_VV_db_slv68_23Aug2016	Sigma0_VV_db_slv70_04Sep2016	Sigma0_VV_db_slv72_16Sep2016	Sigma0_VV_db_slv74_28Sep2016	Sigma0_VV_db_slv76_10Oct2016	Sigma0_VV_db_slv78_22Oct2016	Sigma0_VV_db_slv80_03Nov2016	Sigma0_VV_db_slv82_15Nov2016	Sigma0_VV_db_slv84_27Nov2016	Sigma0_VV_db_slv86_21Dec2016	Sigma0_VV_db_slv88_02Jan2017	Sigma0_VV_db_slv90_14Jan2017	Sigma0_VV_db_slv92_26Jan2017	Sigma0_VV_db_slv94_07Feb2017	Sigma0_VV_db_slv96_19Feb2017
[truncated: 610 more rows]
[truncated: 6 more columns]

[truncated: 3 more sheets: Earthroad-BareSoil, SForest, Farmland]
